# Supplementary material for: Proteome and allergenome of the European house dust mite Dermatophagoides pteronyssinus
Source: PLoS One. 2019 May 1;14(5):e0216171. doi: 10.1371/journal.pone.0216171 (PMC6493757; doi:10.1371/journal.pone.0216171)
Supplement: S7 Data — (XLSX) [file pone.0216171.s011.xlsx]

## Sheet: Sheet1
	Tags	SeqName	Description	Length	#Hits	e-Value	sim mean	#GO	GO IDs	GO Names	Enzyme Codes	Enzyme Names	InterPro IDs	InterPro GO IDs	InterPro GO Names
TRUE	[INTERPRO, BLASTED, MAPPED, GO-SLIM]	DERPT_G8629	: Full=3-oxoacyl-	246	20	1.00546e-74	57.85	12	C:GO:0005739; C:GO:0005886; P:GO:0005975; P:GO:0005975; P:GO:0006629; P:GO:0009056; P:GO:0009056; F:GO:0016491; P:GO:0034641; P:GO:0044281; P:GO:0051186; P:GO:0065003	C:mitochondrion; C:plasma membrane; P:carbohydrate metabolic process; P:carbohydrate metabolic process; P:lipid metabolic process; P:catabolic process; P:catabolic process; F:oxidoreductase activity; P:cellular nitrogen compound metabolic process; P:small molecule metabolic process; P:cofactor metabolic process; P:protein-containing complex assembly	EC:1.1.1.10; EC:1.1.1.184	L-xylulose reductase; Carbonyl reductase (NADPH)	IPR002347 (PRINTS); IPR002347 (PRINTS); PF13561 (PFAM); G3DSA:3.40.50.720 (GENE3D); PTHR44252 (PANTHER); PTHR44252:SF3 (PANTHER); IPR020904 (PROSITE_PATTERNS); IPR036291 (SUPERFAMILY)	F:GO:0016491	F:oxidoreductase activity
TRUE	[INTERPRO, BLASTED, MAPPED, GO-SLIM]	DERPT_G9063	: Full=Retinol dehydrogenase 10	319	20	1.91576e-61	56.55	10	C:GO:0005783; C:GO:0005811; P:GO:0006629; P:GO:0008283; P:GO:0009056; P:GO:0009058; P:GO:0009058; P:GO:0009790; F:GO:0016491; P:GO:0044281	C:endoplasmic reticulum; C:lipid droplet; P:lipid metabolic process; P:cell proliferation; P:catabolic process; P:biosynthetic process; P:biosynthetic process; P:embryo development; F:oxidoreductase activity; P:small molecule metabolic process	EC:1.1.1.105	All-trans-retinol dehydrogenase (NAD(+))	IPR002347 (PRINTS); IPR002347 (PRINTS); IPR002347 (PFAM); G3DSA:3.40.50.720 (GENE3D); PTHR24322 (PANTHER); PTHR24322:SF634 (PANTHER); TRANSMEMBRANE (PHOBIUS); CYTOPLASMIC_DOMAIN (PHOBIUS); NON_CYTOPLASMIC_DOMAIN (PHOBIUS); cd05339 (CDD); IPR036291 (SUPERFAMILY); TMhelix (TMHMM)	no GO terms	no GO terms
TRUE	[INTERPRO, BLASTED, MAPPED, GO-SLIM]	DERPT_G3197	: Full=D-beta-hydroxybutyrate mitochondrial ame: Full=3-hydroxybutyrate dehydrogenase Short=BDH Flags: Precursor	1079	20	7.01524e-48	54.11	11	P:GO:0000003; C:GO:0005634; C:GO:0005739; C:GO:0005783; P:GO:0006629; P:GO:0009058; P:GO:0009058; F:GO:0016491; F:GO:0016746; P:GO:0044281; P:GO:0048856	P:reproduction; C:nucleus; C:mitochondrion; C:endoplasmic reticulum; P:lipid metabolic process; P:biosynthetic process; P:biosynthetic process; F:oxidoreductase activity; F:transferase activity, transferring acyl groups; P:small molecule metabolic process; P:anatomical structure development	EC:1.1.1.105	All-trans-retinol dehydrogenase (NAD(+))	Coil (COILS); IPR002347 (PRINTS); IPR002347 (PRINTS); IPR006621 (SMART); IPR002656 (PFAM); G3DSA:3.40.50.720 (GENE3D); IPR002347 (PFAM); PTHR11161 (PANTHER); IPR020904 (PROSITE_PATTERNS); TRANSMEMBRANE (PHOBIUS); TRANSMEMBRANE (PHOBIUS); CYTOPLASMIC_DOMAIN (PHOBIUS); NON_CYTOPLASMIC_DOMAIN (PHOBIUS); TRANSMEMBRANE (PHOBIUS); TRANSMEMBRANE (PHOBIUS); CYTOPLASMIC_DOMAIN (PHOBIUS); CYTOPLASMIC_DOMAI…	F:GO:0016491; F:GO:0016747	F:oxidoreductase activity; F:transferase activity, transferring acyl groups other than amino-acyl groups
TRUE	[INTERPRO, BLASTED, MAPPED, GO-SLIM]	DERPT_G6720	: Full=Retinol dehydrogenase 10	345	20	7.64154e-71	58.66	11	C:GO:0005783; C:GO:0005811; C:GO:0005829; P:GO:0006629; P:GO:0008283; P:GO:0009056; P:GO:0009058; P:GO:0009058; P:GO:0009790; F:GO:0016491; P:GO:0044281	C:endoplasmic reticulum; C:lipid droplet; C:cytosol; P:lipid metabolic process; P:cell proliferation; P:catabolic process; P:biosynthetic process; P:biosynthetic process; P:embryo development; F:oxidoreductase activity; P:small molecule metabolic process	EC:1.1.1.105; EC:1.1.1.62	All-trans-retinol dehydrogenase (NAD(+)); 17-beta-estradiol 17-dehydrogenase	IPR002347 (PRINTS); IPR002347 (PRINTS); G3DSA:3.40.50.720 (GENE3D); IPR002347 (PFAM); PTHR24322 (PANTHER); CYTOPLASMIC_DOMAIN (PHOBIUS); NON_CYTOPLASMIC_DOMAIN (PHOBIUS); TRANSMEMBRANE (PHOBIUS); cd05339 (CDD); IPR036291 (SUPERFAMILY); TMhelix (TMHMM)	no GO terms	no GO terms
TRUE	[INTERPRO, BLASTED, MAPPED, GO-SLIM]	DERPT_G6355	: Full=Sorbitol dehydrogenase ame: Full=L-iditol 2-dehydrogenase	654	20	5.44174e-108	63	14	F:GO:0003677; C:GO:0005739; C:GO:0005829; C:GO:0005929; P:GO:0005975; P:GO:0005975; P:GO:0009056; P:GO:0009056; P:GO:0009058; P:GO:0009058; F:GO:0016491; F:GO:0043167; P:GO:0044281; P:GO:0048870	F:DNA binding; C:mitochondrion; C:cytosol; C:cilium; P:carbohydrate metabolic process; P:carbohydrate metabolic process; P:catabolic process; P:catabolic process; P:biosynthetic process; P:biosynthetic process; F:oxidoreductase activity; F:ion binding; P:small molecule metabolic process; P:cell motility	EC:1.1.1.14	L-iditol 2-dehydrogenase	IPR020843 (SMART); IPR003656 (PFAM); IPR013154 (PFAM); G3DSA:3.40.50.720 (GENE3D); G3DSA:3.90.180.10 (GENE3D); IPR013149 (PFAM); mobidb-lite (MOBIDB_LITE); mobidb-lite (MOBIDB_LITE); mobidb-lite (MOBIDB_LITE); PTHR43161 (PANTHER); IPR003656 (PROSITE_PROFILES); cd05285 (CDD); IPR036291 (SUPERFAMILY); IPR011032 (SUPERFAMILY)	F:GO:0003677; F:GO:0016491; P:GO:0055114	F:DNA binding; F:oxidoreductase activity; P:oxidation-reduction process
TRUE	[INTERPRO, BLASTED, MAPPED, GO-SLIM]	DERPT_G12	: Full=Sorbitol dehydrogenase ame: Full=L-iditol 2-dehydrogenase	718	20	5.24682e-102	62.79	13	C:GO:0005739; C:GO:0005829; C:GO:0005929; P:GO:0005975; P:GO:0005975; P:GO:0009056; P:GO:0009056; P:GO:0009058; P:GO:0009058; F:GO:0016491; F:GO:0043167; P:GO:0044281; P:GO:0048870	C:mitochondrion; C:cytosol; C:cilium; P:carbohydrate metabolic process; P:carbohydrate metabolic process; P:catabolic process; P:catabolic process; P:biosynthetic process; P:biosynthetic process; F:oxidoreductase activity; F:ion binding; P:small molecule metabolic process; P:cell motility	EC:1.1.1.14	L-iditol 2-dehydrogenase	IPR020843 (SMART); G3DSA:3.40.50.720 (GENE3D); G3DSA:3.90.180.10 (GENE3D); IPR013154 (PFAM); IPR013149 (PFAM); PTHR43161 (PANTHER); PTHR43161:SF9 (PANTHER); PTHR43161 (PANTHER); PTHR43161:SF9 (PANTHER); cd05285 (CDD); cd05285 (CDD); IPR036291 (SUPERFAMILY); IPR011032 (SUPERFAMILY); IPR011032 (SUPERFAMILY); IPR036291 (SUPERFAMILY)	F:GO:0016491; P:GO:0055114	F:oxidoreductase activity; P:oxidation-reduction process
TRUE	[INTERPRO, BLASTED, MAPPED, GO-SLIM]	DERPT_G10462	: Full=Sorbitol dehydrogenase ame: Full=L-iditol 2-dehydrogenase	583	20	4.16637e-94	58.5	17	F:GO:0003677; C:GO:0005634; C:GO:0005694; C:GO:0005739; C:GO:0005829; C:GO:0005929; P:GO:0005975; P:GO:0005975; P:GO:0009056; P:GO:0009056; P:GO:0009058; P:GO:0009058; F:GO:0016491; P:GO:0044281; P:GO:0048870; P:GO:0051276; P:GO:0065003	F:DNA binding; C:nucleus; C:chromosome; C:mitochondrion; C:cytosol; C:cilium; P:carbohydrate metabolic process; P:carbohydrate metabolic process; P:catabolic process; P:catabolic process; P:biosynthetic process; P:biosynthetic process; F:oxidoreductase activity; P:small molecule metabolic process; P:cell motility; P:chromosome organization; P:protein-containing complex assembly	EC:1.1.1.14	L-iditol 2-dehydrogenase	IPR005819 (PRINTS); IPR005818 (SMART); IPR020843 (SMART); G3DSA:3.40.50.720 (GENE3D); IPR005818 (PFAM); IPR036388 (G3DSA:1.10.10.GENE3D); IPR013149 (PFAM); IPR013154 (PFAM); G3DSA:3.90.180.10 (GENE3D); mobidb-lite (MOBIDB_LITE); mobidb-lite (MOBIDB_LITE); PTHR43161:SF9 (PANTHER); PTHR43161 (PANTHER); IPR002328 (PROSITE_PATTERNS); IPR005818 (PROSITE_PROFILES); cd05285 (CDD); cd00073 (CDD); IPR0362…	C:GO:0000786; F:GO:0003677; C:GO:0005634; P:GO:0006334; F:GO:0008270; F:GO:0016491; P:GO:0055114	C:nucleosome; F:DNA binding; C:nucleus; P:nucleosome assembly; F:zinc ion binding; F:oxidoreductase activity; P:oxidation-reduction process
TRUE	[INTERPRO, BLASTED, MAPPED, GO-SLIM]	DERPT_G311	: Full=Succinate dehydrogenase	1045	20	0	84.86	13	C:GO:0005618; C:GO:0005739; C:GO:0005794; P:GO:0005975; P:GO:0005975; P:GO:0006091; P:GO:0006810; P:GO:0009790; F:GO:0016491; C:GO:0032991; P:GO:0034641; F:GO:0043167; P:GO:0044281	C:cell wall; C:mitochondrion; C:Golgi apparatus; P:carbohydrate metabolic process; P:carbohydrate metabolic process; P:generation of precursor metabolites and energy; P:transport; P:embryo development; F:oxidoreductase activity; C:protein-containing complex; P:cellular nitrogen compound metabolic process; F:ion binding; P:small molecule metabolic process	EC:1.1.1.14; EC:1.3.99.1; EC:1.3.5.1	L-iditol 2-dehydrogenase; Deleted entry; Succinate dehydrogenase (quinone)	IPR013763 (SMART); G3DSA:1.10.472.10 (GENE3D); IPR036188 (G3DSA:3.50.50.GENE3D); G3DSA:4.10.80.40 (GENE3D); IPR027477 (G3DSA:3.90.700.GENE3D); G3DSA:1.20.58.100 (GENE3D); IPR011281 (TIGRFAM); G3DSA:1.10.472.10 (GENE3D); IPR015939 (PFAM); IPR003953 (PFAM); IPR006671 (PFAM); IPR014006 (TIGRFAM); mobidb-lite (MOBIDB_LITE); mobidb-lite (MOBIDB_LITE); PTHR11632 (PANTHER); PTHR11632:SF51 (PANTHER); IPR…	P:GO:0006099; F:GO:0016491; F:GO:0016627; P:GO:0022900; F:GO:0050660; P:GO:0055114	P:tricarboxylic acid cycle; F:oxidoreductase activity; F:oxidoreductase activity, acting on the CH-CH group of donors; P:electron transport chain; F:flavin adenine dinucleotide binding; P:oxidation-reduction process
TRUE	[INTERPRO, BLASTED, MAPPED, GO-SLIM]	DERPT_G8461	: Full=Sorbitol dehydrogenase ame: Full=L-iditol 2-dehydrogenase	990	20	5.30437e-103	62.68	16	C:GO:0005739; C:GO:0005829; C:GO:0005929; P:GO:0005975; P:GO:0005975; P:GO:0006629; P:GO:0009056; P:GO:0009056; P:GO:0009058; P:GO:0009058; F:GO:0016491; F:GO:0016829; P:GO:0034641; F:GO:0043167; P:GO:0044281; P:GO:0048870	C:mitochondrion; C:cytosol; C:cilium; P:carbohydrate metabolic process; P:carbohydrate metabolic process; P:lipid metabolic process; P:catabolic process; P:catabolic process; P:biosynthetic process; P:biosynthetic process; F:oxidoreductase activity; F:lyase activity; P:cellular nitrogen compound metabolic process; F:ion binding; P:small molecule metabolic process; P:cell motility	EC:1.1.1.14; EC:4.3.3.2	L-iditol 2-dehydrogenase; Strictosidine synthase	Coil (COILS); IPR020843 (SMART); IPR011042 (G3DSA:2.120.10.GENE3D); G3DSA:3.90.180.10 (GENE3D); IPR018119 (PFAM); IPR013154 (PFAM); IPR013149 (PFAM); G3DSA:3.40.50.720 (GENE3D); PTHR43161 (PANTHER); cd05285 (CDD); SSF63829 (SUPERFAMILY); IPR011032 (SUPERFAMILY); IPR036291 (SUPERFAMILY)	P:GO:0009058; F:GO:0016491; F:GO:0016844; P:GO:0055114	P:biosynthetic process; F:oxidoreductase activity; F:strictosidine synthase activity; P:oxidation-reduction process
TRUE	[INTERPRO, BLASTED, MAPPED, MANUAL, GO-SLIM]	DERPT_G7527	LEA homology: Full=3 beta-hydroxysteroid dehydrogenase Delta 5--	364	20	1.62757e-39	48.66	4	C:GO:0005739; P:GO:0006629; P:GO:0009058; F:GO:0016491	C:mitochondrion; P:lipid metabolic process; P:biosynthetic process; F:oxidoreductase activity	EC:1.1.1.145	3-beta-hydroxy-Delta(5)-steroid dehydrogenase	IPR002225 (PFAM); G3DSA:3.40.50.720 (GENE3D); PTHR10366 (PANTHER); PTHR10366:SF551 (PANTHER); TRANSMEMBRANE (PHOBIUS); CYTOPLASMIC_DOMAIN (PHOBIUS); NON_CYTOPLASMIC_DOMAIN (PHOBIUS); IPR036291 (SUPERFAMILY); TMhelix (TMHMM)	F:GO:0003854; P:GO:0006694; F:GO:0016616; P:GO:0055114	F:3-beta-hydroxy-delta5-steroid dehydrogenase activity; P:steroid biosynthetic process; F:oxidoreductase activity, acting on the CH-OH group of donors, NAD or NADP as acceptor; P:oxidation-reduction process
TRUE	[INTERPRO, BLASTED, MAPPED, GO-SLIM]	DERPT_G9216	: Full=Pyruvate dehydrogenase E1 component subunit alpha	492	20	0	61.09	12	C:GO:0005739; P:GO:0006520; P:GO:0006629; P:GO:0006950; P:GO:0009056; P:GO:0009056; P:GO:0009058; P:GO:0009058; F:GO:0016491; C:GO:0032991; P:GO:0034641; P:GO:0051186	C:mitochondrion; P:cellular amino acid metabolic process; P:lipid metabolic process; P:response to stress; P:catabolic process; P:catabolic process; P:biosynthetic process; P:biosynthetic process; F:oxidoreductase activity; C:protein-containing complex; P:cellular nitrogen compound metabolic process; P:cofactor metabolic process	EC:1.1.1.169; EC:1.2.4.4	2-dehydropantoate 2-reductase; 3-methyl-2-oxobutanoate dehydrogenase (2-methylpropanoyl-transferring)	IPR001017 (PFAM); G3DSA:3.40.50.970 (GENE3D); PTHR43380 (PANTHER); IPR034616 (PTHR43380:PANTHER); cd02000 (CDD); IPR029061 (SUPERFAMILY)	F:GO:0003826; F:GO:0003863; P:GO:0008152; P:GO:0009083; F:GO:0016624	F:alpha-ketoacid dehydrogenase activity; F:3-methyl-2-oxobutanoate dehydrogenase (2-methylpropanoyl-transferring) activity; P:metabolic process; P:branched-chain amino acid catabolic process; F:oxidoreductase activity, acting on the aldehyde or oxo group of donors, disulfide as acceptor
TRUE	[INTERPRO, BLASTED, MAPPED, GO-SLIM]	DERPT_G7335	: Full=Pyruvate dehydrogenase E1 component subunit alpha	484	20	2.59313e-144	59.49	12	C:GO:0005739; P:GO:0006520; P:GO:0006629; P:GO:0006950; P:GO:0009056; P:GO:0009056; P:GO:0009058; P:GO:0009058; F:GO:0016491; C:GO:0032991; P:GO:0034641; P:GO:0051186	C:mitochondrion; P:cellular amino acid metabolic process; P:lipid metabolic process; P:response to stress; P:catabolic process; P:catabolic process; P:biosynthetic process; P:biosynthetic process; F:oxidoreductase activity; C:protein-containing complex; P:cellular nitrogen compound metabolic process; P:cofactor metabolic process	EC:1.1.1.169; EC:1.2.4.4	2-dehydropantoate 2-reductase; 3-methyl-2-oxobutanoate dehydrogenase (2-methylpropanoyl-transferring)	IPR001017 (PFAM); G3DSA:3.40.50.970 (GENE3D); PTHR43380 (PANTHER); IPR034616 (PTHR43380:PANTHER); cd02000 (CDD); IPR029061 (SUPERFAMILY)	F:GO:0003826; F:GO:0003863; P:GO:0008152; P:GO:0009083; F:GO:0016624	F:alpha-ketoacid dehydrogenase activity; F:3-methyl-2-oxobutanoate dehydrogenase (2-methylpropanoyl-transferring) activity; P:metabolic process; P:branched-chain amino acid catabolic process; F:oxidoreductase activity, acting on the aldehyde or oxo group of donors, disulfide as acceptor
TRUE	[INTERPRO, BLASTED, MAPPED, GO-SLIM]	DERPT_G930	: Full=Glucose 1-dehydrogenase	266	20	5.76408e-42	54.9	17	C:GO:0005576; C:GO:0005635; C:GO:0005777; P:GO:0005975; P:GO:0005975; P:GO:0006091; P:GO:0006629; P:GO:0007165; P:GO:0009056; P:GO:0009056; P:GO:0009058; P:GO:0009058; F:GO:0016491; P:GO:0034641; P:GO:0044281; P:GO:0051186; P:GO:0065003	C:extracellular region; C:nuclear envelope; C:peroxisome; P:carbohydrate metabolic process; P:carbohydrate metabolic process; P:generation of precursor metabolites and energy; P:lipid metabolic process; P:signal transduction; P:catabolic process; P:catabolic process; P:biosynthetic process; P:biosynthetic process; F:oxidoreductase activity; P:cellular nitrogen compound metabolic process; P:small …	EC:1.1.1.184; EC:1.1.1.71; EC:1.1.1.270	Carbonyl reductase (NADPH); Alcohol dehydrogenase (NAD(P)(+)); 3-beta-hydroxysteroid 3-dehydrogenase	IPR002347 (PRINTS); IPR002347 (PRINTS); G3DSA:3.40.50.720 (GENE3D); PF13561 (PFAM); PTHR43975 (PANTHER); IPR020904 (PROSITE_PATTERNS); IPR036291 (SUPERFAMILY)	F:GO:0016491	F:oxidoreductase activity
TRUE	[INTERPRO, BLASTED, MAPPED, GO-SLIM]	DERPT_G4241	: Full=Oxidoreductase	288	20	1.48677e-41	53.96	17	C:GO:0005576; C:GO:0005635; C:GO:0005777; P:GO:0005975; P:GO:0005975; P:GO:0006091; P:GO:0006629; P:GO:0007165; P:GO:0009056; P:GO:0009056; P:GO:0009058; P:GO:0009058; F:GO:0016491; P:GO:0034641; P:GO:0044281; P:GO:0051186; P:GO:0065003	C:extracellular region; C:nuclear envelope; C:peroxisome; P:carbohydrate metabolic process; P:carbohydrate metabolic process; P:generation of precursor metabolites and energy; P:lipid metabolic process; P:signal transduction; P:catabolic process; P:catabolic process; P:biosynthetic process; P:biosynthetic process; F:oxidoreductase activity; P:cellular nitrogen compound metabolic process; P:small …	EC:1.1.1.184; EC:1.1.1.71; EC:1.1.1.270	Carbonyl reductase (NADPH); Alcohol dehydrogenase (NAD(P)(+)); 3-beta-hydroxysteroid 3-dehydrogenase	IPR002347 (PRINTS); IPR002347 (PRINTS); PF13561 (PFAM); G3DSA:3.40.50.720 (GENE3D); PTHR43975 (PANTHER); IPR020904 (PROSITE_PATTERNS); IPR036291 (SUPERFAMILY)	F:GO:0016491	F:oxidoreductase activity
TRUE	[INTERPRO, BLASTED, MAPPED, GO-SLIM]	DERPT_G11215	: Full=3-oxoacyl-	989	20	3.34185e-78	52.86	18	C:GO:0005576; C:GO:0005635; C:GO:0005777; P:GO:0005975; P:GO:0005975; P:GO:0006091; P:GO:0006629; P:GO:0007165; F:GO:0008233; P:GO:0009056; P:GO:0009056; P:GO:0009058; P:GO:0009058; F:GO:0016491; P:GO:0034641; P:GO:0044281; P:GO:0051186; P:GO:0065003	C:extracellular region; C:nuclear envelope; C:peroxisome; P:carbohydrate metabolic process; P:carbohydrate metabolic process; P:generation of precursor metabolites and energy; P:lipid metabolic process; P:signal transduction; F:peptidase activity; P:catabolic process; P:catabolic process; P:biosynthetic process; P:biosynthetic process; F:oxidoreductase activity; P:cellular nitrogen compound metab…	EC:1.1.1.184; EC:1.1.1.71; EC:1.1.1.270	Carbonyl reductase (NADPH); Alcohol dehydrogenase (NAD(P)(+)); 3-beta-hydroxysteroid 3-dehydrogenase	IPR002347 (PRINTS); IPR002347 (PRINTS); G3DSA:3.40.50.720 (GENE3D); PF13561 (PFAM); IPR001375 (PFAM); IPR029058 (G3DSA:3.40.50.GENE3D); PTHR42776:SF4 (PANTHER); PTHR42776 (PANTHER); IPR020904 (PROSITE_PATTERNS); IPR036291 (SUPERFAMILY); IPR029058 (SUPERFAMILY)	P:GO:0006508; F:GO:0008236; F:GO:0016491	P:proteolysis; F:serine-type peptidase activity; F:oxidoreductase activity
TRUE	[INTERPRO, BLASTED, MAPPED, GO-SLIM]	DERPT_G6178	: Full=Eukaryotic translation initiation factor 4E Short=eIF-4E Short=eIF4E ame: Full=eIF-4F 25 kDa subunit ame: Full=mRNA cap-binding	637	20	3.07384e-51	61.25	27	P:GO:0000003; P:GO:0000278; P:GO:0000278; C:GO:0005634; C:GO:0005840; C:GO:0005856; C:GO:0005886; P:GO:0005975; P:GO:0005975; P:GO:0006091; P:GO:0006629; P:GO:0006950; P:GO:0007059; F:GO:0008135; P:GO:0008219; P:GO:0008283; P:GO:0009056; P:GO:0009056; P:GO:0009790; F:GO:0016491; P:GO:0030154; C:GO:0032991; P:GO:0040007; P:GO:0044281; P:GO:0051186; P:GO:0051276; P:GO:0051301	P:reproduction; P:mitotic cell cycle; P:mitotic cell cycle; C:nucleus; C:ribosome; C:cytoskeleton; C:plasma membrane; P:carbohydrate metabolic process; P:carbohydrate metabolic process; P:generation of precursor metabolites and energy; P:lipid metabolic process; P:response to stress; P:chromosome segregation; F:translation factor activity, RNA binding; P:cell death; P:cell proliferation; P:catabo…	EC:1.1.1.2	Alcohol dehydrogenase (NADP(+))	IPR002347 (PFAM); IPR001040 (PFAM); G3DSA:3.40.50.720 (GENE3D); IPR023398 (G3DSA:3.30.760.GENE3D); PTHR24320 (PANTHER); IPR013152 (PROSITE_PATTERNS); TRANSMEMBRANE (PHOBIUS); NON_CYTOPLASMIC_DOMAIN (PHOBIUS); NON_CYTOPLASMIC_DOMAIN (PHOBIUS); CYTOPLASMIC_DOMAIN (PHOBIUS); TRANSMEMBRANE (PHOBIUS); IPR023398 (SUPERFAMILY); IPR036291 (SUPERFAMILY)	F:GO:0003723; F:GO:0003743; C:GO:0005737; P:GO:0006413	F:RNA binding; F:translation initiation factor activity; C:cytoplasm; P:translational initiation
TRUE	[INTERPRO, BLASTED, MAPPED, GO-SLIM]	DERPT_G5455	: Full=WW domain-containing oxidoreductase	382	20	1.32347e-37	48.47	17	C:GO:0005886; P:GO:0005975; P:GO:0005975; P:GO:0006091; P:GO:0006629; P:GO:0007165; P:GO:0008219; P:GO:0009056; P:GO:0009056; P:GO:0009058; P:GO:0009058; C:GO:0009536; F:GO:0016491; P:GO:0034641; P:GO:0044281; P:GO:0048856; P:GO:0051186	C:plasma membrane; P:carbohydrate metabolic process; P:carbohydrate metabolic process; P:generation of precursor metabolites and energy; P:lipid metabolic process; P:signal transduction; P:cell death; P:catabolic process; P:catabolic process; P:biosynthetic process; P:biosynthetic process; C:plastid; F:oxidoreductase activity; P:cellular nitrogen compound metabolic process; P:small molecule metab…	EC:1.1.1.2	Alcohol dehydrogenase (NADP(+))	Coil (COILS); IPR002347 (PRINTS); G3DSA:3.40.50.720 (GENE3D); IPR002347 (PFAM); PTHR24320:SF145 (PANTHER); PTHR24320 (PANTHER); SIGNAL_PEPTIDE_H_REGION (PHOBIUS); SIGNAL_PEPTIDE_N_REGION (PHOBIUS); SIGNAL_PEPTIDE (PHOBIUS); SIGNAL_PEPTIDE_C_REGION (PHOBIUS); NON_CYTOPLASMIC_DOMAIN (PHOBIUS); IPR036291 (SUPERFAMILY)	no GO terms	no GO terms
TRUE	[INTERPRO, BLASTED, MAPPED, GO-SLIM]	DERPT_G9515	: Full=Inosine-5 -monophosphate dehydrogenase Short=IMP dehydrogenase Short=IMPD Short=IMPDH	519	20	0	80.23	22	P:GO:0000003; P:GO:0000902; P:GO:0002376; F:GO:0003677; F:GO:0003729; C:GO:0005576; C:GO:0005654; C:GO:0005739; C:GO:0005777; P:GO:0008283; P:GO:0009058; P:GO:0009058; P:GO:0016192; F:GO:0016491; P:GO:0030154; C:GO:0032991; P:GO:0034641; P:GO:0040011; F:GO:0043167; P:GO:0043473; P:GO:0044281; P:GO:0065003	P:reproduction; P:cell morphogenesis; P:immune system process; F:DNA binding; F:mRNA binding; C:extracellular region; C:nucleoplasm; C:mitochondrion; C:peroxisome; P:cell proliferation; P:biosynthetic process; P:biosynthetic process; P:vesicle-mediated transport; F:oxidoreductase activity; P:cell differentiation; C:protein-containing complex; P:cellular nitrogen compound metabolic process; P:loco…	EC:1.1.1.205	IMP dehydrogenase	SM01240 (SMART); IPR000644 (SMART); IPR005990 (PIRSF); IPR001093 (PFAM); IPR005990 (TIGRFAM); IPR013785 (G3DSA:3.20.20.GENE3D); IPR000644 (PFAM); IPR013785 (G3DSA:3.20.20.GENE3D); PTHR11911 (PANTHER); PTHR11911:SF121 (PANTHER); IPR015875 (PROSITE_PATTERNS); IPR005990 (HAMAP); IPR000644 (PROSITE_PROFILES); IPR000644 (PROSITE_PROFILES); cd04602 (CDD); IPR001093 (CDD); SSF51412 (SUPERFAMILY); SSF514…	F:GO:0003824; F:GO:0003938; P:GO:0006164; F:GO:0016491; P:GO:0055114	F:catalytic activity; F:IMP dehydrogenase activity; P:purine nucleotide biosynthetic process; F:oxidoreductase activity; P:oxidation-reduction process
TRUE	[INTERPRO, BLASTED, MAPPED, GO-SLIM]	DERPT_G502	: Full=Aldose reductase Short=AR ame: Full=Aldehyde reductase	827	20	6.09222e-103	66.36	20	C:GO:0005576; C:GO:0005739; C:GO:0005764; C:GO:0005829; C:GO:0005886; P:GO:0005975; P:GO:0005975; P:GO:0006629; P:GO:0006950; P:GO:0008219; P:GO:0009056; P:GO:0009056; P:GO:0009058; P:GO:0009058; F:GO:0016491; P:GO:0019748; P:GO:0042592; P:GO:0044281; P:GO:0048856; P:GO:0051186	C:extracellular region; C:mitochondrion; C:lysosome; C:cytosol; C:plasma membrane; P:carbohydrate metabolic process; P:carbohydrate metabolic process; P:lipid metabolic process; P:response to stress; P:cell death; P:catabolic process; P:catabolic process; P:biosynthetic process; P:biosynthetic process; F:oxidoreductase activity; P:secondary metabolic process; P:homeostatic process; P:small molecu…	EC:1.1.1.21; EC:1.2.1.36; EC:1.1.1.112; EC:1.1.1.19; EC:1.1.1.62; EC:1.1.1.2	Aldehyde reductase; Retinal dehydrogenase; Indanol dehydrogenase; Glucuronate reductase; 17-beta-estradiol 17-dehydrogenase; Alcohol dehydrogenase (NADP(+))	IPR020471 (PRINTS); IPR023210 (PFAM); IPR036812 (G3DSA:3.20.20.GENE3D); PTHR11732:SF375 (PANTHER); IPR020471 (PANTHER); IPR018170 (PROSITE_PATTERNS); IPR018170 (PROSITE_PATTERNS); CYTOPLASMIC_DOMAIN (PHOBIUS); NON_CYTOPLASMIC_DOMAIN (PHOBIUS); SIGNAL_PEPTIDE_C_REGION (PHOBIUS); SIGNAL_PEPTIDE_N_REGION (PHOBIUS); CYTOPLASMIC_DOMAIN (PHOBIUS); TRANSMEMBRANE (PHOBIUS); TRANSMEMBRANE (PHOBIUS); NON_C…	F:GO:0016491; P:GO:0055114	F:oxidoreductase activity; P:oxidation-reduction process
TRUE	[INTERPRO, BLASTED, MAPPED, GO-SLIM]	DERPT_G10488	: Full=Alcohol dehydrogenase	335	20	1.20788e-72	59.08	16	C:GO:0005576; C:GO:0005739; C:GO:0005829; C:GO:0005886; P:GO:0005975; P:GO:0005975; P:GO:0006397; P:GO:0006629; P:GO:0009056; P:GO:0009056; P:GO:0009058; P:GO:0009058; F:GO:0016491; P:GO:0019748; P:GO:0044281; P:GO:0051186	C:extracellular region; C:mitochondrion; C:cytosol; C:plasma membrane; P:carbohydrate metabolic process; P:carbohydrate metabolic process; P:mRNA processing; P:lipid metabolic process; P:catabolic process; P:catabolic process; P:biosynthetic process; P:biosynthetic process; F:oxidoreductase activity; P:secondary metabolic process; P:small molecule metabolic process; P:cofactor metabolic process	EC:1.1.1.21; EC:1.2.1.36; EC:1.1.1.112; EC:1.1.1.19; EC:1.1.1.62; EC:1.1.1.2; EC:1.1.1.209	Aldehyde reductase; Retinal dehydrogenase; Indanol dehydrogenase; Glucuronate reductase; 17-beta-estradiol 17-dehydrogenase; Alcohol dehydrogenase (NADP(+)); 3(or 17)-alpha-hydroxysteroid dehydrogenase	IPR020471 (PRINTS); IPR036812 (G3DSA:3.20.20.GENE3D); IPR023210 (PFAM); IPR020471 (PIRSF); IPR020471 (PANTHER); PTHR11732:SF375 (PANTHER); IPR018170 (PROSITE_PATTERNS); IPR018170 (PROSITE_PATTERNS); IPR018170 (PROSITE_PATTERNS); IPR023210 (CDD); IPR036812 (SUPERFAMILY)	F:GO:0016491; P:GO:0055114	F:oxidoreductase activity; P:oxidation-reduction process
TRUE	[INTERPRO, BLASTED, MAPPED, GO-SLIM]	DERPT_G10493	: Full=Aldo-keto reductase family 1 member C1 homolog ame: Full=20-alpha-hydroxysteroid dehydrogenase Short=20-alpha-HSD ame: Full=Dihydrodiol dehydrogenase 1 Short=DD-1 Short=DD1 ame: Full=Indanol dehydrogenase	1655	20	5.38734e-79	61.75	21	C:GO:0005576; C:GO:0005634; C:GO:0005739; C:GO:0005764; C:GO:0005829; P:GO:0005975; P:GO:0005975; P:GO:0006397; P:GO:0006629; P:GO:0006950; P:GO:0008219; P:GO:0009056; P:GO:0009056; P:GO:0009058; P:GO:0009058; F:GO:0016491; P:GO:0019748; P:GO:0042592; P:GO:0044281; P:GO:0048856; P:GO:0051186	C:extracellular region; C:nucleus; C:mitochondrion; C:lysosome; C:cytosol; P:carbohydrate metabolic process; P:carbohydrate metabolic process; P:mRNA processing; P:lipid metabolic process; P:response to stress; P:cell death; P:catabolic process; P:catabolic process; P:biosynthetic process; P:biosynthetic process; F:oxidoreductase activity; P:secondary metabolic process; P:homeostatic process; P:s…	EC:1.1.1.21; EC:1.2.1.36; EC:1.1.1.112; EC:1.1.1.62; EC:1.1.1.2	Aldehyde reductase; Retinal dehydrogenase; Indanol dehydrogenase; 17-beta-estradiol 17-dehydrogenase; Alcohol dehydrogenase (NADP(+))	Coil (COILS); IPR020471 (PRINTS); IPR007484 (PFAM); IPR036812 (G3DSA:3.20.20.GENE3D); IPR029058 (G3DSA:3.40.50.GENE3D); IPR013818 (PFAM); IPR023210 (PFAM); mobidb-lite (MOBIDB_LITE); IPR020471 (PANTHER); PTHR11732:SF375 (PANTHER); IPR018170 (PROSITE_PATTERNS); IPR018170 (PROSITE_PATTERNS); IPR023210 (CDD); IPR033906 (CDD); IPR029058 (SUPERFAMILY); SSF53187 (SUPERFAMILY); IPR036812 (SUPERFAMILY)	P:GO:0006629; F:GO:0016491; P:GO:0055114	P:lipid metabolic process; F:oxidoreductase activity; P:oxidation-reduction process
TRUE	[INTERPRO, BLASTED, MAPPED, GO-SLIM]	DERPT_G3141	: Full=Alcohol dehydrogenase	317	20	1.06076e-74	57.91	20	P:GO:0000003; C:GO:0005576; C:GO:0005634; C:GO:0005739; C:GO:0005829; C:GO:0005886; P:GO:0005975; P:GO:0005975; P:GO:0006397; P:GO:0006629; P:GO:0006810; P:GO:0006810; P:GO:0009056; P:GO:0009056; P:GO:0009058; P:GO:0009058; F:GO:0016491; P:GO:0019748; P:GO:0044281; P:GO:0051186	P:reproduction; C:extracellular region; C:nucleus; C:mitochondrion; C:cytosol; C:plasma membrane; P:carbohydrate metabolic process; P:carbohydrate metabolic process; P:mRNA processing; P:lipid metabolic process; P:transport; P:transport; P:catabolic process; P:catabolic process; P:biosynthetic process; P:biosynthetic process; F:oxidoreductase activity; P:secondary metabolic process; P:small molec…	EC:1.1.1.21; EC:1.2.1.36; EC:1.1.1.149; EC:1.1.1.112; EC:1.1.1.19; EC:1.1.1.62; EC:1.1.1.2; EC:1.1.1.209	Aldehyde reductase; Retinal dehydrogenase; 20-alpha-hydroxysteroid dehydrogenase; Indanol dehydrogenase; Glucuronate reductase; 17-beta-estradiol 17-dehydrogenase; Alcohol dehydrogenase (NADP(+)); 3(or 17)-alpha-hydroxysteroid dehydrogenase	IPR020471 (PRINTS); IPR020471 (PIRSF); IPR023210 (PFAM); IPR036812 (G3DSA:3.20.20.GENE3D); IPR020471 (PANTHER); PTHR11732:SF375 (PANTHER); IPR018170 (PROSITE_PATTERNS); IPR023210 (CDD); IPR036812 (SUPERFAMILY)	F:GO:0016491; P:GO:0055114	F:oxidoreductase activity; P:oxidation-reduction process
TRUE	[INTERPRO, BLASTED, MAPPED, GO-SLIM]	DERPT_G5348	: Full=UDP-glucose 6-dehydrogenase Short=UDP-Glc dehydrogenase Short=UDP- Short=UDPGDH	652	20	0	74.95	20	P:GO:0000003; C:GO:0005576; C:GO:0005618; C:GO:0005654; C:GO:0005829; P:GO:0005975; P:GO:0005975; P:GO:0006790; P:GO:0007165; P:GO:0007267; P:GO:0009058; P:GO:0009058; P:GO:0009790; F:GO:0016491; P:GO:0034641; C:GO:0043226; P:GO:0044281; P:GO:0048646; P:GO:0048870; P:GO:0071554	P:reproduction; C:extracellular region; C:cell wall; C:nucleoplasm; C:cytosol; P:carbohydrate metabolic process; P:carbohydrate metabolic process; P:sulfur compound metabolic process; P:signal transduction; P:cell-cell signaling; P:biosynthetic process; P:biosynthetic process; P:embryo development; F:oxidoreductase activity; P:cellular nitrogen compound metabolic process; C:organelle; P:small mol…	EC:1.1.1.22	UDP-glucose 6-dehydrogenase	IPR014027 (SMART); IPR029325 (SMART); IPR017476 (TIGRFAM); IPR001732 (PFAM); G3DSA:3.40.50.720 (GENE3D); IPR028356 (PIRSF); G3DSA:3.40.50.720 (GENE3D); IPR014027 (PFAM); IPR017476 (PIRSF); IPR014026 (PFAM); IPR029325 (PFAM); G3DSA:1.20.5.100 (GENE3D); PTHR11374:SF3 (PANTHER); PTHR11374 (PANTHER); IPR036220 (SUPERFAMILY); IPR008927 (SUPERFAMILY); IPR036291 (SUPERFAMILY)	F:GO:0003979; F:GO:0005102; F:GO:0016616; F:GO:0051287; P:GO:0055114	F:UDP-glucose 6-dehydrogenase activity; F:signaling receptor binding; F:oxidoreductase activity, acting on the CH-OH group of donors, NAD or NADP as acceptor; F:NAD binding; P:oxidation-reduction process
TRUE	[INTERPRO, BLASTED, MAPPED, GO-SLIM]	DERPT_G6087	: Full=17-beta-hydroxysteroid dehydrogenase type 6 Short=17-beta-HSD 6 Short=17-beta-HSD6 ame: Full=3-alpha-	927	20	2.24762e-55	57.02	10	P:GO:0000003; C:GO:0005730; C:GO:0005739; C:GO:0005783; P:GO:0006629; P:GO:0009058; P:GO:0009058; P:GO:0009790; F:GO:0016491; P:GO:0044281	P:reproduction; C:nucleolus; C:mitochondrion; C:endoplasmic reticulum; P:lipid metabolic process; P:biosynthetic process; P:biosynthetic process; P:embryo development; F:oxidoreductase activity; P:small molecule metabolic process	EC:1.1.1.239; EC:1.1.1.105; EC:1.1.1.1	3-alpha-(17-beta)-hydroxysteroid dehydrogenase (NAD(+)); All-trans-retinol dehydrogenase (NAD(+)); Alcohol dehydrogenase	IPR002347 (PRINTS); IPR002347 (PRINTS); G3DSA:3.40.50.720 (GENE3D); IPR002347 (PFAM); IPR006845 (PFAM); IPR013083 (G3DSA:3.30.40.GENE3D); PTHR43313:SF25 (PANTHER); PTHR43313:SF25 (PANTHER); PTHR43313 (PANTHER); PTHR43313 (PANTHER); IPR020904 (PROSITE_PATTERNS); IPR017907 (PROSITE_PATTERNS); IPR020904 (PROSITE_PATTERNS); NON_CYTOPLASMIC_DOMAIN (PHOBIUS); NON_CYTOPLASMIC_DOMAIN (PHOBIUS); TRANSMEMB…	F:GO:0016491	F:oxidoreductase activity
TRUE	[INTERPRO, BLASTED, MAPPED, GO-SLIM]	DERPT_G1029	: Full=3-oxoacyl-	249	20	7.14459e-70	61.34	11	C:GO:0005739; C:GO:0005886; P:GO:0006520; P:GO:0006629; P:GO:0009056; P:GO:0009056; P:GO:0009058; P:GO:0009058; F:GO:0016491; P:GO:0034641; P:GO:0040007	C:mitochondrion; C:plasma membrane; P:cellular amino acid metabolic process; P:lipid metabolic process; P:catabolic process; P:catabolic process; P:biosynthetic process; P:biosynthetic process; F:oxidoreductase activity; P:cellular nitrogen compound metabolic process; P:growth	EC:1.1.1.239; EC:1.1.1.35; EC:1.1.1.62	3-alpha-(17-beta)-hydroxysteroid dehydrogenase (NAD(+)); 3-hydroxyacyl-CoA dehydrogenase; 17-beta-estradiol 17-dehydrogenase	IPR002347 (PRINTS); IPR002347 (PRINTS); SM00822 (SMART); G3DSA:3.40.50.720 (GENE3D); PF13561 (PFAM); PTHR42760 (PANTHER); PTHR42760:SF19 (PANTHER); IPR020904 (PROSITE_PATTERNS); IPR036291 (SUPERFAMILY)	F:GO:0016491	F:oxidoreductase activity
TRUE	[INTERPRO, BLASTED, MAPPED, GO-SLIM]	DERPT_G3669	: Full=3-oxoacyl-	256	20	1.51458e-104	57.17	24	C:GO:0005618; C:GO:0005739; C:GO:0005783; C:GO:0005811; C:GO:0005829; C:GO:0005856; C:GO:0005886; P:GO:0006399; P:GO:0006520; P:GO:0006629; P:GO:0006790; P:GO:0007005; P:GO:0007165; F:GO:0008289; P:GO:0009056; P:GO:0009056; P:GO:0009058; P:GO:0009058; C:GO:0009536; F:GO:0016491; C:GO:0032991; P:GO:0048856; P:GO:0051186; P:GO:0065003	C:cell wall; C:mitochondrion; C:endoplasmic reticulum; C:lipid droplet; C:cytosol; C:cytoskeleton; C:plasma membrane; P:tRNA metabolic process; P:cellular amino acid metabolic process; P:lipid metabolic process; P:sulfur compound metabolic process; P:mitochondrion organization; P:signal transduction; F:lipid binding; P:catabolic process; P:catabolic process; P:biosynthetic process; P:biosynthetic…	EC:1.1.1.239; EC:1.1.1.36; EC:1.1.1.201; EC:1.1.1.35; EC:1.1.1.62	3-alpha-(17-beta)-hydroxysteroid dehydrogenase (NAD(+)); Acetoacetyl-CoA reductase; 7-beta-hydroxysteroid dehydrogenase (NADP(+)); 3-hydroxyacyl-CoA dehydrogenase; 17-beta-estradiol 17-dehydrogenase	IPR002347 (PRINTS); IPR002347 (PRINTS); SM00822 (SMART); IPR002347 (PFAM); G3DSA:3.40.50.720 (GENE3D); PTHR43658 (PANTHER); PTHR43658:SF6 (PANTHER); IPR020904 (PROSITE_PATTERNS); cd05371 (CDD); IPR036291 (SUPERFAMILY)	F:GO:0016491	F:oxidoreductase activity
TRUE	[INTERPRO, BLASTED, MAPPED, GO-SLIM]	DERPT_G1168	: Full=Oxidoreductase	261	20	2.25901e-67	51.64	16	C:GO:0005618; C:GO:0005739; C:GO:0005783; C:GO:0005811; C:GO:0005856; C:GO:0005886; P:GO:0006399; P:GO:0006629; P:GO:0006790; P:GO:0007005; P:GO:0009058; F:GO:0016491; C:GO:0032991; P:GO:0044281; P:GO:0048856; P:GO:0051186	C:cell wall; C:mitochondrion; C:endoplasmic reticulum; C:lipid droplet; C:cytoskeleton; C:plasma membrane; P:tRNA metabolic process; P:lipid metabolic process; P:sulfur compound metabolic process; P:mitochondrion organization; P:biosynthetic process; F:oxidoreductase activity; C:protein-containing complex; P:small molecule metabolic process; P:anatomical structure development; P:cofactor metaboli…	EC:1.1.1.239; EC:1.1.1.36; EC:1.1.1.201; EC:1.1.1.62	3-alpha-(17-beta)-hydroxysteroid dehydrogenase (NAD(+)); Acetoacetyl-CoA reductase; 7-beta-hydroxysteroid dehydrogenase (NADP(+)); 17-beta-estradiol 17-dehydrogenase	IPR002347 (PRINTS); IPR002347 (PRINTS); IPR002347 (PFAM); G3DSA:3.40.50.720 (GENE3D); PTHR43658 (PANTHER); PTHR43658:SF6 (PANTHER); SIGNAL_PEPTIDE_H_REGION (PHOBIUS); SIGNAL_PEPTIDE (PHOBIUS); SIGNAL_PEPTIDE_N_REGION (PHOBIUS); NON_CYTOPLASMIC_DOMAIN (PHOBIUS); SIGNAL_PEPTIDE_C_REGION (PHOBIUS); IPR036291 (SUPERFAMILY)	no GO terms	no GO terms
TRUE	[INTERPRO, BLASTED, MAPPED, GO-SLIM]	DERPT_G10370	: Full=GDP-L-fucose synthase ame: Full=GDP-4-keto-6-deoxy-D-mannose-3,5-epimerase-4-reductase	351	20	2.45945e-133	53.92	10	C:GO:0005576; P:GO:0005975; P:GO:0005975; P:GO:0006810; P:GO:0006810; P:GO:0009058; F:GO:0016491; P:GO:0034641; C:GO:0043226; P:GO:0044281	C:extracellular region; P:carbohydrate metabolic process; P:carbohydrate metabolic process; P:transport; P:transport; P:biosynthetic process; F:oxidoreductase activity; P:cellular nitrogen compound metabolic process; C:organelle; P:small molecule metabolic process	EC:1.1.1.271	GDP-L-fucose synthase	G3DSA:3.40.50.720 (GENE3D); G3DSA:3.90.25.10 (GENE3D); IPR001509 (PFAM); PTHR43238 (PANTHER); PTHR43238:SF1 (PANTHER); IPR028614 (HAMAP); IPR028614 (CDD); IPR036291 (SUPERFAMILY)	F:GO:0003824; P:GO:0009226; F:GO:0016491; F:GO:0050662	F:catalytic activity; P:nucleotide-sugar biosynthetic process; F:oxidoreductase activity; F:coenzyme binding
TRUE	[INTERPRO, BLASTED, MAPPED, GO-SLIM]	DERPT_G8393	: Full=Alcohol dehydrogenase class-3 ame: Full=Alcohol dehydrogenase class-III ame: Full=Glutathione-dependent formaldehyde dehydrogenase Short=FALDH Short=FDH Short=GSH-FDH ame: Full=S-(hydroxymethyl)glutathione dehydrogenase	786	20	2.55054e-132	59.34	5	C:GO:0005737; P:GO:0006464; F:GO:0016491; P:GO:0044281; P:GO:0050877	C:cytoplasm; P:cellular protein modification process; F:oxidoreductase activity; P:small molecule metabolic process; P:nervous system process	EC:1.1.1.284; EC:1.1.1.73; EC:1.1.1.1	S-(hydroxymethyl)glutathione dehydrogenase; Octanol dehydrogenase; Alcohol dehydrogenase	IPR020843 (SMART); IPR013149 (PFAM); G3DSA:3.40.50.720 (GENE3D); G3DSA:3.90.180.10 (GENE3D); IPR013154 (PFAM); G3DSA:3.90.180.10 (GENE3D); G3DSA:3.40.50.720 (GENE3D); IPR002328 (PROSITE_PATTERNS); IPR002328 (PROSITE_PATTERNS); IPR011032 (SUPERFAMILY); IPR011032 (SUPERFAMILY); IPR036291 (SUPERFAMILY); IPR011032 (SUPERFAMILY); IPR011032 (SUPERFAMILY); IPR036291 (SUPERFAMILY)	F:GO:0008270; F:GO:0016491; P:GO:0055114	F:zinc ion binding; F:oxidoreductase activity; P:oxidation-reduction process
TRUE	[INTERPRO, BLASTED, MAPPED, GO-SLIM]	DERPT_G3194	: Full=3-hydroxybutyryl- dehydrogenase ame: Full=Beta-hydroxybutyryl- dehydrogenase Short=BHBD	1365	20	9.11375e-80	58.58	15	C:GO:0005618; C:GO:0005739; C:GO:0005829; C:GO:0005840; C:GO:0005886; P:GO:0006520; P:GO:0006629; F:GO:0008135; P:GO:0009056; P:GO:0009056; P:GO:0009790; F:GO:0016491; F:GO:0016874; F:GO:0043167; P:GO:0044403	C:cell wall; C:mitochondrion; C:cytosol; C:ribosome; C:plasma membrane; P:cellular amino acid metabolic process; P:lipid metabolic process; F:translation factor activity, RNA binding; P:catabolic process; P:catabolic process; P:embryo development; F:oxidoreductase activity; F:ligase activity; F:ion binding; P:symbiont process	EC:1.1.1.35; EC:1.1.1.157	3-hydroxyacyl-CoA dehydrogenase; 3-hydroxybutyryl-CoA dehydrogenase	Coil (COILS); IPR001841 (SMART); IPR006108 (PFAM); IPR027370 (PFAM); IPR001040 (PFAM); IPR023398 (G3DSA:3.30.760.GENE3D); IPR013083 (G3DSA:3.30.40.GENE3D); IPR006176 (PFAM); G3DSA:3.40.50.720 (GENE3D); IPR010652 (PFAM); IPR013328 (G3DSA:1.10.1040.GENE3D); G3DSA:3.40.50.720 (GENE3D); mobidb-lite (MOBIDB_LITE); mobidb-lite (MOBIDB_LITE); mobidb-lite (MOBIDB_LITE); IPR017907 (PROSITE_PATTERNS); IPR0…	F:GO:0003723; F:GO:0003743; F:GO:0003857; C:GO:0005737; P:GO:0006413; P:GO:0006631; F:GO:0016491; P:GO:0055114	F:RNA binding; F:translation initiation factor activity; F:3-hydroxyacyl-CoA dehydrogenase activity; C:cytoplasm; P:translational initiation; P:fatty acid metabolic process; F:oxidoreductase activity; P:oxidation-reduction process
TRUE	[INTERPRO, BLASTED, MAPPED, GO-SLIM]	DERPT_G5245	: Full=3-oxoacyl-	1047	20	0	59.03	19	P:GO:0000003; C:GO:0005618; C:GO:0005739; C:GO:0005777; C:GO:0005886; P:GO:0006464; P:GO:0006520; P:GO:0006629; P:GO:0009056; P:GO:0009056; P:GO:0009058; P:GO:0009058; C:GO:0009536; F:GO:0016491; F:GO:0016829; P:GO:0030154; P:GO:0034641; F:GO:0043167; P:GO:0048856	P:reproduction; C:cell wall; C:mitochondrion; C:peroxisome; C:plasma membrane; P:cellular protein modification process; P:cellular amino acid metabolic process; P:lipid metabolic process; P:catabolic process; P:catabolic process; P:biosynthetic process; P:biosynthetic process; C:plastid; F:oxidoreductase activity; F:lyase activity; P:cell differentiation; P:cellular nitrogen compound metabolic pr…	EC:1.1.1.35; EC:4.2.1.17	3-hydroxyacyl-CoA dehydrogenase; Enoyl-CoA hydratase	IPR002347 (PRINTS); IPR002347 (PRINTS); SM00822 (SMART); IPR036527 (G3DSA:3.30.1050.GENE3D); G3DSA:3.40.50.720 (GENE3D); IPR003033 (PFAM); G3DSA:3.10.129.10 (GENE3D); IPR036527 (G3DSA:3.30.1050.GENE3D); IPR002539 (PFAM); G3DSA:3.10.129.10 (GENE3D); IPR002347 (PFAM); mobidb-lite (MOBIDB_LITE); PTHR45024:SF2 (PANTHER); PTHR45024 (PANTHER); PTHR45024 (PANTHER); PTHR45024 (PANTHER); PTHR45024:SF2 (PA…	F:GO:0016491	F:oxidoreductase activity
TRUE	[INTERPRO, BLASTED, MAPPED, GO-SLIM]	DERPT_G4258	: Full=Fatty acid oxidation complex subunit alpha Includes: ame: Full=Enoyl- hydratase 3-hydroxybutyryl- epimerase Includes: ame: Full=3-hydroxyacyl- dehydrogenase	808	20	0	59.93	13	C:GO:0005576; C:GO:0005739; P:GO:0006520; P:GO:0006629; P:GO:0009056; P:GO:0009056; P:GO:0009058; P:GO:0009058; F:GO:0016491; F:GO:0016746; F:GO:0016829; P:GO:0034641; F:GO:0043167	C:extracellular region; C:mitochondrion; P:cellular amino acid metabolic process; P:lipid metabolic process; P:catabolic process; P:catabolic process; P:biosynthetic process; P:biosynthetic process; F:oxidoreductase activity; F:transferase activity, transferring acyl groups; F:lyase activity; P:cellular nitrogen compound metabolic process; F:ion binding	EC:1.1.1.35; EC:4.2.1.74; EC:1.1.1.211; EC:2.3.1.16; EC:4.2.1.17	3-hydroxyacyl-CoA dehydrogenase; Long-chain-enoyl-CoA hydratase; Long-chain-3-hydroxyacyl-CoA dehydrogenase; Acetyl-CoA C-acyltransferase; Enoyl-CoA hydratase	IPR001753 (PFAM); G3DSA:3.90.226.10 (GENE3D); G3DSA:1.10.1040.50 (GENE3D); IPR006108 (PFAM); G3DSA:3.40.50.720 (GENE3D); IPR006176 (PFAM); IPR012803 (TIGRFAM); PTHR43612 (PANTHER); PTHR43612:SF3 (PANTHER); IPR018376 (PROSITE_PATTERNS); cd06558 (CDD); IPR029045 (SUPERFAMILY); IPR008927 (SUPERFAMILY); IPR008927 (SUPERFAMILY); IPR036291 (SUPERFAMILY)	F:GO:0003824; F:GO:0003857; F:GO:0004300; C:GO:0005739; P:GO:0006631; P:GO:0006635; P:GO:0008152; F:GO:0016491; C:GO:0016507; P:GO:0055114	F:catalytic activity; F:3-hydroxyacyl-CoA dehydrogenase activity; F:enoyl-CoA hydratase activity; C:mitochondrion; P:fatty acid metabolic process; P:fatty acid beta-oxidation; P:metabolic process; F:oxidoreductase activity; C:mitochondrial fatty acid beta-oxidation multienzyme complex; P:oxidation-reduction process
TRUE	[INTERPRO, BLASTED, MAPPED, GO-SLIM]	DERPT_G4242	: Full=3-ketoacyl- thiolase ame: Full=ACSs ame: Full=Acetyl- acyltransferase ame: Full=Acyl- ligase ame: Full=Beta-ketothiolase ame: Full=Fatty acid oxidation complex subunit beta	468	20	0	68.19	14	C:GO:0005576; C:GO:0005739; C:GO:0005783; P:GO:0006520; P:GO:0006629; P:GO:0009056; P:GO:0009056; P:GO:0009058; P:GO:0009058; F:GO:0016491; F:GO:0016746; F:GO:0016829; P:GO:0034641; F:GO:0043167	C:extracellular region; C:mitochondrion; C:endoplasmic reticulum; P:cellular amino acid metabolic process; P:lipid metabolic process; P:catabolic process; P:catabolic process; P:biosynthetic process; P:biosynthetic process; F:oxidoreductase activity; F:transferase activity, transferring acyl groups; F:lyase activity; P:cellular nitrogen compound metabolic process; F:ion binding	EC:1.1.1.35; EC:4.2.1.74; EC:1.1.1.211; EC:2.3.1.16; EC:4.2.1.17	3-hydroxyacyl-CoA dehydrogenase; Long-chain-enoyl-CoA hydratase; Long-chain-3-hydroxyacyl-CoA dehydrogenase; Acetyl-CoA C-acyltransferase; Enoyl-CoA hydratase	IPR002155 (TIGRFAM); IPR020616 (PFAM); IPR016039 (G3DSA:3.40.47.GENE3D); IPR020617 (PFAM); PTHR18919:SF5 (PANTHER); PTHR18919 (PANTHER); IPR020613 (PROSITE_PATTERNS); SIGNAL_PEPTIDE_C_REGION (PHOBIUS); NON_CYTOPLASMIC_DOMAIN (PHOBIUS); SIGNAL_PEPTIDE_H_REGION (PHOBIUS); SIGNAL_PEPTIDE_N_REGION (PHOBIUS); SIGNAL_PEPTIDE (PHOBIUS); IPR002155 (CDD); SignalP-TM (SIGNALP_GRAM_POSITIVE); IPR016039 (SUP…	F:GO:0003824; P:GO:0008152; F:GO:0016747	F:catalytic activity; P:metabolic process; F:transferase activity, transferring acyl groups other than amino-acyl groups
TRUE	[INTERPRO, BLASTED, MAPPED, GO-SLIM]	DERPT_G11832	: Full=Malate cytoplasmic ame: Full=Cytosolic malate dehydrogenase	327	20	5.67534e-124	71.09	16	C:GO:0005615; C:GO:0005634; C:GO:0005739; C:GO:0005773; C:GO:0005794; C:GO:0005815; C:GO:0005829; C:GO:0005886; P:GO:0005975; P:GO:0006091; P:GO:0006950; C:GO:0009536; F:GO:0016491; P:GO:0034641; P:GO:0044281; P:GO:0051186	C:extracellular space; C:nucleus; C:mitochondrion; C:vacuole; C:Golgi apparatus; C:microtubule organizing center; C:cytosol; C:plasma membrane; P:carbohydrate metabolic process; P:generation of precursor metabolites and energy; P:response to stress; C:plastid; F:oxidoreductase activity; P:cellular nitrogen compound metabolic process; P:small molecule metabolic process; P:cofactor metabolic process	EC:1.1.1.37	Malate dehydrogenase	Coil (COILS); IPR015955 (G3DSA:3.90.110.GENE3D); IPR001236 (PFAM); IPR001557 (PIRSF); IPR022383 (PFAM); IPR010945 (TIGRFAM); G3DSA:3.40.50.720 (GENE3D); IPR010945 (PANTHER); PTHR23382:SF3 (PANTHER); IPR001252 (PROSITE_PATTERNS); IPR015955 (SUPERFAMILY); IPR036291 (SUPERFAMILY)	F:GO:0003824; P:GO:0005975; P:GO:0006108; F:GO:0016491; F:GO:0016615; F:GO:0016616; P:GO:0019752; P:GO:0055114	F:catalytic activity; P:carbohydrate metabolic process; P:malate metabolic process; F:oxidoreductase activity; F:malate dehydrogenase activity; F:oxidoreductase activity, acting on the CH-OH group of donors, NAD or NADP as acceptor; P:carboxylic acid metabolic process; P:oxidation-reduction process
TRUE	[INTERPRO, BLASTED, MAPPED, MANUAL, GO-SLIM]	DERPT_G6183	Proposed Stren-Allergen, Allergen Homolog (Asp f MDH, Mal f4, Cit iMDH): Full=Malate mitochondrial Flags: Precursor	343	20	8.87881e-167	79.16	34	F:GO:0005507; C:GO:0005618; C:GO:0005654; C:GO:0005743; C:GO:0005759; C:GO:0005774; C:GO:0005794; C:GO:0005829; C:GO:0005886; P:GO:0005975; P:GO:0006090; P:GO:0006107; P:GO:0006108; P:GO:0006475; P:GO:0006734; F:GO:0008746; P:GO:0009409; C:GO:0009570; P:GO:0009651; P:GO:0009735; P:GO:0009793; C:GO:0009941; C:GO:0010319; P:GO:0015976; P:GO:0019643; F:GO:0030060; P:GO:0042742; C:GO:0043209; F:GO:00…	F:copper ion binding; C:cell wall; C:nucleoplasm; C:mitochondrial inner membrane; C:mitochondrial matrix; C:vacuolar membrane; C:Golgi apparatus; C:cytosol; C:plasma membrane; P:carbohydrate metabolic process; P:pyruvate metabolic process; P:oxaloacetate metabolic process; P:malate metabolic process; P:internal protein amino acid acetylation; P:NADH metabolic process; F:NAD(P)+ transhydrogenase a…	EC:1.1.1.37; EC:1.1.1.82	Malate dehydrogenase; Malate dehydrogenase (NADP(+))	IPR001236 (PFAM); G3DSA:3.40.50.720 (GENE3D); IPR022383 (PFAM); IPR010097 (TIGRFAM); IPR001557 (PIRSF); IPR015955 (G3DSA:3.90.110.GENE3D); PTHR11540 (PANTHER); IPR001252 (PROSITE_PATTERNS); cd01337 (CDD); IPR036291 (SUPERFAMILY); IPR015955 (SUPERFAMILY)	F:GO:0003824; P:GO:0005975; P:GO:0006099; P:GO:0006108; F:GO:0016491; F:GO:0016615; F:GO:0016616; P:GO:0019752; F:GO:0030060; P:GO:0055114	F:catalytic activity; P:carbohydrate metabolic process; P:tricarboxylic acid cycle; P:malate metabolic process; F:oxidoreductase activity; F:malate dehydrogenase activity; F:oxidoreductase activity, acting on the CH-OH group of donors, NAD or NADP as acceptor; P:carboxylic acid metabolic process; F:L-malate dehydrogenase activity; P:oxidation-reduction process
TRUE	[INTERPRO, BLASTED, MAPPED, GO-SLIM]	DERPT_G7543	: Full=NADP-dependent malic enzyme Short=NADP-ME	780	20	0	67.18	17	C:GO:0005576; C:GO:0005618; C:GO:0005739; C:GO:0005773; C:GO:0005829; C:GO:0005886; P:GO:0006091; P:GO:0006629; P:GO:0009058; P:GO:0009058; C:GO:0009536; F:GO:0016491; P:GO:0034641; F:GO:0043167; P:GO:0044281; P:GO:0051186; P:GO:0065003	C:extracellular region; C:cell wall; C:mitochondrion; C:vacuole; C:cytosol; C:plasma membrane; P:generation of precursor metabolites and energy; P:lipid metabolic process; P:biosynthetic process; P:biosynthetic process; C:plastid; F:oxidoreductase activity; P:cellular nitrogen compound metabolic process; F:ion binding; P:small molecule metabolic process; P:cofactor metabolic process; P:protein-co…	EC:1.1.1.38; EC:1.1.1.39; EC:1.1.1.40	Malate dehydrogenase (oxaloacetate-decarboxylating); Malate dehydrogenase (decarboxylating); Malate dehydrogenase (oxaloacetate-decarboxylating) (NADP(+))	IPR001891 (PRINTS); IPR012301 (SMART); IPR012302 (SMART); IPR012302 (PFAM); G3DSA:3.40.50.720 (GENE3D); IPR012301 (PFAM); IPR037062 (G3DSA:3.40.50.GENE3D); G3DSA:3.40.50.720 (GENE3D); IPR001891 (PIRSF); PTHR23406 (PANTHER); IPR015884 (PROSITE_PATTERNS); NON_CYTOPLASMIC_DOMAIN (PHOBIUS); TRANSMEMBRANE (PHOBIUS); CYTOPLASMIC_DOMAIN (PHOBIUS); cd05312 (CDD); SSF53223 (SUPERFAMILY); IPR036291 (SUPERF…	F:GO:0004470; F:GO:0004471; F:GO:0051287; P:GO:0055114	F:malic enzyme activity; F:malate dehydrogenase (decarboxylating) (NAD+) activity; F:NAD binding; P:oxidation-reduction process
TRUE	[INTERPRO, BLASTED, MAPPED, GO-SLIM]	DERPT_G1148	: Full=NADP-dependent malic enzyme Short=NADP-ME	581	20	0	67.73	13	C:GO:0005739; C:GO:0005829; P:GO:0006091; P:GO:0006629; P:GO:0009058; P:GO:0009058; C:GO:0009536; F:GO:0016491; P:GO:0034641; F:GO:0043167; P:GO:0044281; P:GO:0051186; P:GO:0065003	C:mitochondrion; C:cytosol; P:generation of precursor metabolites and energy; P:lipid metabolic process; P:biosynthetic process; P:biosynthetic process; C:plastid; F:oxidoreductase activity; P:cellular nitrogen compound metabolic process; F:ion binding; P:small molecule metabolic process; P:cofactor metabolic process; P:protein-containing complex assembly	EC:1.1.1.38; EC:1.1.1.39; EC:1.1.1.40	Malate dehydrogenase (oxaloacetate-decarboxylating); Malate dehydrogenase (decarboxylating); Malate dehydrogenase (oxaloacetate-decarboxylating) (NADP(+))	IPR001891 (PRINTS); IPR012302 (SMART); IPR012301 (SMART); G3DSA:3.30.2330.30 (GENE3D); G3DSA:1.20.1370.30 (GENE3D); IPR001891 (PIRSF); G3DSA:3.40.50.720 (GENE3D); IPR012301 (PFAM); IPR037062 (G3DSA:3.40.50.GENE3D); IPR012302 (PFAM); PTHR23406 (PANTHER); IPR015884 (PROSITE_PATTERNS); TRANSMEMBRANE (PHOBIUS); NON_CYTOPLASMIC_DOMAIN (PHOBIUS); CYTOPLASMIC_DOMAIN (PHOBIUS); cd05312 (CDD); IPR036291 (…	F:GO:0004470; F:GO:0004471; F:GO:0051287; P:GO:0055114	F:malic enzyme activity; F:malate dehydrogenase (decarboxylating) (NAD+) activity; F:NAD binding; P:oxidation-reduction process
TRUE	[INTERPRO, BLASTED, MAPPED, GO-SLIM]	DERPT_G917	: Full=Isocitrate dehydrogenase	408	20	4.06985e-136	69.09	13	C:GO:0005654; C:GO:0005730; C:GO:0005739; P:GO:0006091; P:GO:0006520; P:GO:0009058; P:GO:0009058; F:GO:0016491; C:GO:0032991; P:GO:0034641; P:GO:0040007; F:GO:0043167; P:GO:0051186	C:nucleoplasm; C:nucleolus; C:mitochondrion; P:generation of precursor metabolites and energy; P:cellular amino acid metabolic process; P:biosynthetic process; P:biosynthetic process; F:oxidoreductase activity; C:protein-containing complex; P:cellular nitrogen compound metabolic process; P:growth; F:ion binding; P:cofactor metabolic process	EC:1.1.1.41	Isocitrate dehydrogenase (NAD(+))	IPR024084 (SMART); G3DSA:3.40.718.10 (GENE3D); IPR004434 (TIGRFAM); IPR024084 (PFAM); PTHR11835:SF42 (PANTHER); PTHR11835 (PANTHER); IPR019818 (PROSITE_PATTERNS); SSF53659 (SUPERFAMILY)	F:GO:0000287; F:GO:0004449; P:GO:0006099; F:GO:0016616; F:GO:0051287; P:GO:0055114	F:magnesium ion binding; F:isocitrate dehydrogenase (NAD+) activity; P:tricarboxylic acid cycle; F:oxidoreductase activity, acting on the CH-OH group of donors, NAD or NADP as acceptor; F:NAD binding; P:oxidation-reduction process
TRUE	[INTERPRO, BLASTED, MAPPED, GO-SLIM]	DERPT_G4267	: Full=Isocitrate dehydrogenase	371	20	0	78.56	20	P:GO:0000003; C:GO:0005576; C:GO:0005634; C:GO:0005739; C:GO:0005811; C:GO:0005856; P:GO:0006091; P:GO:0006520; P:GO:0007568; P:GO:0009058; P:GO:0009058; C:GO:0009536; P:GO:0009790; P:GO:0016192; F:GO:0016491; C:GO:0032991; P:GO:0034641; P:GO:0040011; F:GO:0043167; P:GO:0051186	P:reproduction; C:extracellular region; C:nucleus; C:mitochondrion; C:lipid droplet; C:cytoskeleton; P:generation of precursor metabolites and energy; P:cellular amino acid metabolic process; P:aging; P:biosynthetic process; P:biosynthetic process; C:plastid; P:embryo development; P:vesicle-mediated transport; F:oxidoreductase activity; C:protein-containing complex; P:cellular nitrogen compound m…	EC:1.1.1.41	Isocitrate dehydrogenase (NAD(+))	IPR024084 (SMART); IPR024084 (PFAM); IPR004434 (TIGRFAM); G3DSA:3.40.718.10 (GENE3D); PTHR11835 (PANTHER); PTHR11835:SF34 (PANTHER); IPR019818 (PROSITE_PATTERNS); SSF53659 (SUPERFAMILY)	F:GO:0000287; F:GO:0004449; P:GO:0006099; F:GO:0016616; F:GO:0051287; P:GO:0055114	F:magnesium ion binding; F:isocitrate dehydrogenase (NAD+) activity; P:tricarboxylic acid cycle; F:oxidoreductase activity, acting on the CH-OH group of donors, NAD or NADP as acceptor; F:NAD binding; P:oxidation-reduction process
TRUE	[INTERPRO, BLASTED, MAPPED, GO-SLIM]	DERPT_G3092	: Full=Isocitrate dehydrogenase	744	20	2.78175e-157	70.18	15	F:GO:0004871; C:GO:0005576; C:GO:0005634; C:GO:0005739; P:GO:0006091; P:GO:0006520; P:GO:0007267; P:GO:0009058; P:GO:0009058; F:GO:0016491; F:GO:0022857; F:GO:0022857; F:GO:0022857; C:GO:0032991; F:GO:0043167	F:obsolete signal transducer activity; C:extracellular region; C:nucleus; C:mitochondrion; P:generation of precursor metabolites and energy; P:cellular amino acid metabolic process; P:cell-cell signaling; P:biosynthetic process; P:biosynthetic process; F:oxidoreductase activity; F:transmembrane transporter activity; F:transmembrane transporter activity; F:transmembrane transporter activity; C:pro…	EC:1.1.1.41	Isocitrate dehydrogenase (NAD(+))	IPR024084 (SMART); G3DSA:3.40.190.10 (GENE3D); G3DSA:1.10.287.70 (GENE3D); IPR019594 (PFAM); IPR024084 (PFAM); G3DSA:3.40.190.10 (GENE3D); IPR004434 (TIGRFAM); G3DSA:3.40.718.10 (GENE3D); PTHR11835 (PANTHER); PTHR11835:SF57 (PANTHER); IPR019818 (PROSITE_PATTERNS); TRANSMEMBRANE (PHOBIUS); NON_CYTOPLASMIC_DOMAIN (PHOBIUS); CYTOPLASMIC_DOMAIN (PHOBIUS); NON_CYTOPLASMIC_DOMAIN (PHOBIUS); TRANSMEMBRA…	F:GO:0000287; F:GO:0004449; F:GO:0004970; F:GO:0005234; P:GO:0006099; C:GO:0016020; F:GO:0016616; F:GO:0051287; P:GO:0055114	F:magnesium ion binding; F:isocitrate dehydrogenase (NAD+) activity; F:ionotropic glutamate receptor activity; F:extracellularly glutamate-gated ion channel activity; P:tricarboxylic acid cycle; C:membrane; F:oxidoreductase activity, acting on the CH-OH group of donors, NAD or NADP as acceptor; F:NAD binding; P:oxidation-reduction process
TRUE	[INTERPRO, BLASTED, MAPPED, GO-SLIM]	DERPT_G7108	: Full=Isocitrate dehydrogenase	412	20	0	83.6	29	C:GO:0005576; C:GO:0005739; C:GO:0005777; C:GO:0005829; C:GO:0005886; P:GO:0005975; P:GO:0005975; P:GO:0006091; P:GO:0006629; P:GO:0006790; P:GO:0006810; P:GO:0006810; P:GO:0006950; P:GO:0007155; P:GO:0007165; P:GO:0008283; P:GO:0009056; P:GO:0009056; P:GO:0009058; P:GO:0009058; C:GO:0009536; F:GO:0016491; P:GO:0030154; P:GO:0034641; F:GO:0043167; P:GO:0044281; P:GO:0048856; P:GO:0048870; P:GO:00…	C:extracellular region; C:mitochondrion; C:peroxisome; C:cytosol; C:plasma membrane; P:carbohydrate metabolic process; P:carbohydrate metabolic process; P:generation of precursor metabolites and energy; P:lipid metabolic process; P:sulfur compound metabolic process; P:transport; P:transport; P:response to stress; P:cell adhesion; P:signal transduction; P:cell proliferation; P:catabolic process; P…	EC:1.1.1.42	Isocitrate dehydrogenase (NADP(+))	IPR024084 (SMART); IPR024084 (PFAM); IPR004790 (TIGRFAM); IPR004790 (PIRSF); G3DSA:3.40.718.10 (GENE3D); IPR004790 (PANTHER); IPR019818 (PROSITE_PATTERNS); SSF53659 (SUPERFAMILY)	F:GO:0000287; F:GO:0004450; P:GO:0006102; F:GO:0016616; F:GO:0051287; P:GO:0055114	F:magnesium ion binding; F:isocitrate dehydrogenase (NADP+) activity; P:isocitrate metabolic process; F:oxidoreductase activity, acting on the CH-OH group of donors, NAD or NADP as acceptor; F:NAD binding; P:oxidation-reduction process
TRUE	[INTERPRO, BLASTED, MAPPED, GO-SLIM]	DERPT_G4885	: Full=Isocitrate dehydrogenase	461	20	0	81.63	29	C:GO:0005576; C:GO:0005739; C:GO:0005777; C:GO:0005829; C:GO:0005886; P:GO:0005975; P:GO:0005975; P:GO:0006091; P:GO:0006629; P:GO:0006790; P:GO:0006810; P:GO:0006810; P:GO:0006950; P:GO:0007155; P:GO:0007165; P:GO:0008283; P:GO:0009056; P:GO:0009056; P:GO:0009058; P:GO:0009058; C:GO:0009536; F:GO:0016491; P:GO:0030154; P:GO:0034641; F:GO:0043167; P:GO:0044281; P:GO:0048856; P:GO:0048870; P:GO:00…	C:extracellular region; C:mitochondrion; C:peroxisome; C:cytosol; C:plasma membrane; P:carbohydrate metabolic process; P:carbohydrate metabolic process; P:generation of precursor metabolites and energy; P:lipid metabolic process; P:sulfur compound metabolic process; P:transport; P:transport; P:response to stress; P:cell adhesion; P:signal transduction; P:cell proliferation; P:catabolic process; P…	EC:1.1.1.42	Isocitrate dehydrogenase (NADP(+))	IPR024084 (SMART); IPR004790 (PIRSF); IPR004790 (TIGRFAM); IPR024084 (PFAM); G3DSA:3.40.718.10 (GENE3D); PTHR11822:SF11 (PANTHER); IPR004790 (PANTHER); IPR019818 (PROSITE_PATTERNS); SSF53659 (SUPERFAMILY)	F:GO:0000287; F:GO:0004450; P:GO:0006102; F:GO:0016616; F:GO:0051287; P:GO:0055114	F:magnesium ion binding; F:isocitrate dehydrogenase (NADP+) activity; P:isocitrate metabolic process; F:oxidoreductase activity, acting on the CH-OH group of donors, NAD or NADP as acceptor; F:NAD binding; P:oxidation-reduction process
TRUE	[INTERPRO, BLASTED, MAPPED, GO-SLIM]	DERPT_G7487	: Full=6-phosphogluconate decarboxylating	489	20	0	80.82	17	C:GO:0005576; C:GO:0005634; C:GO:0005739; C:GO:0005829; C:GO:0005886; P:GO:0005975; P:GO:0005975; P:GO:0006790; P:GO:0006950; P:GO:0009058; P:GO:0009058; P:GO:0009790; F:GO:0016491; P:GO:0034641; F:GO:0043167; P:GO:0044281; P:GO:0051186	C:extracellular region; C:nucleus; C:mitochondrion; C:cytosol; C:plasma membrane; P:carbohydrate metabolic process; P:carbohydrate metabolic process; P:sulfur compound metabolic process; P:response to stress; P:biosynthetic process; P:biosynthetic process; P:embryo development; F:oxidoreductase activity; P:cellular nitrogen compound metabolic process; F:ion binding; P:small molecule metabolic pro…	EC:1.1.1.43; EC:1.1.1.44	Phosphogluconate 2-dehydrogenase; Phosphogluconate dehydrogenase (NADP(+)-dependent, decarboxylating)	IPR006183 (PRINTS); IPR006114 (SMART); IPR006114 (PFAM); IPR006115 (PFAM); IPR013328 (G3DSA:1.10.1040.GENE3D); G3DSA:1.20.5.320 (GENE3D); G3DSA:3.40.50.720 (GENE3D); IPR006113 (TIGRFAM); IPR006113 (PIRSF); PTHR11811:SF25 (PANTHER); PTHR11811 (PANTHER); IPR006184 (PROSITE_PATTERNS); IPR008927 (SUPERFAMILY); IPR036291 (SUPERFAMILY)	F:GO:0004616; P:GO:0006098; F:GO:0016491; P:GO:0055114	F:phosphogluconate dehydrogenase (decarboxylating) activity; P:pentose-phosphate shunt; F:oxidoreductase activity; P:oxidation-reduction process
TRUE	[INTERPRO, BLASTED, MAPPED, GO-SLIM]	DERPT_G9095	: Full= oxidoreductase GLYR1 ame: Full=Glyoxylate reductase 1 homolog ame: Full=Nuclear NP60	526	20	7.57096e-74	49.02	9	C:GO:0005829; P:GO:0005975; P:GO:0005975; P:GO:0006950; C:GO:0009536; F:GO:0016491; P:GO:0034641; P:GO:0044281; P:GO:0051186	C:cytosol; P:carbohydrate metabolic process; P:carbohydrate metabolic process; P:response to stress; C:plastid; F:oxidoreductase activity; P:cellular nitrogen compound metabolic process; P:small molecule metabolic process; P:cofactor metabolic process	EC:1.1.1.44; EC:1.1.1.30	Phosphogluconate dehydrogenase (NADP(+)-dependent, decarboxylating); 3-hydroxybutyrate dehydrogenase	IPR000313 (SMART); IPR006115 (PFAM); IPR000313 (PFAM); G3DSA:3.40.50.720 (GENE3D); IPR029154 (PFAM); IPR013328 (G3DSA:1.10.1040.GENE3D); G3DSA:2.30.30.140 (GENE3D); mobidb-lite (MOBIDB_LITE); PTHR43580 (PANTHER); IPR000313 (PROSITE_PROFILES); IPR036291 (SUPERFAMILY); SSF63748 (SUPERFAMILY); IPR008927 (SUPERFAMILY)	F:GO:0004616; F:GO:0016491; F:GO:0051287; P:GO:0055114	F:phosphogluconate dehydrogenase (decarboxylating) activity; F:oxidoreductase activity; F:NAD binding; P:oxidation-reduction process
TRUE	[INTERPRO, BLASTED, MAPPED, GO-SLIM]	DERPT_G8619	: Full=3-hydroxyisobutyrate mitochondrial Short=HIBADH Flags: Precursor	331	20	1.35338e-103	59.82	11	C:GO:0005739; C:GO:0005811; P:GO:0005975; P:GO:0005975; P:GO:0006520; P:GO:0009056; P:GO:0009056; F:GO:0016491; P:GO:0034641; P:GO:0051186; P:GO:0065003	C:mitochondrion; C:lipid droplet; P:carbohydrate metabolic process; P:carbohydrate metabolic process; P:cellular amino acid metabolic process; P:catabolic process; P:catabolic process; F:oxidoreductase activity; P:cellular nitrogen compound metabolic process; P:cofactor metabolic process; P:protein-containing complex assembly	EC:1.1.1.44; EC:1.1.1.31	Phosphogluconate dehydrogenase (NADP(+)-dependent, decarboxylating); 3-hydroxyisobutyrate dehydrogenase	G3DSA:3.40.50.720 (GENE3D); IPR015815 (PIRSF); IPR029154 (PFAM); IPR011548 (TIGRFAM); IPR006115 (PFAM); IPR013328 (G3DSA:1.10.1040.GENE3D); PTHR22981:SF44 (PANTHER); PTHR22981 (PANTHER); IPR036291 (SUPERFAMILY); IPR008927 (SUPERFAMILY)	F:GO:0004616; F:GO:0008442; F:GO:0016491; F:GO:0051287; P:GO:0055114	F:phosphogluconate dehydrogenase (decarboxylating) activity; F:3-hydroxyisobutyrate dehydrogenase activity; F:oxidoreductase activity; F:NAD binding; P:oxidation-reduction process
TRUE	[INTERPRO, BLASTED, MAPPED, GO-SLIM]	DERPT_G11317	: Full=L-carnitine dehydrogenase Short=CDH Short=L-CDH	312	20	1.92307e-111	57.24	14	C:GO:0005576; C:GO:0005730; C:GO:0005794; C:GO:0005829; C:GO:0005886; P:GO:0006520; P:GO:0006629; P:GO:0009056; P:GO:0009056; P:GO:0009058; P:GO:0009058; F:GO:0016491; P:GO:0034641; F:GO:0043167	C:extracellular region; C:nucleolus; C:Golgi apparatus; C:cytosol; C:plasma membrane; P:cellular amino acid metabolic process; P:lipid metabolic process; P:catabolic process; P:catabolic process; P:biosynthetic process; P:biosynthetic process; F:oxidoreductase activity; P:cellular nitrogen compound metabolic process; F:ion binding	EC:1.1.1.45; EC:1.1.1.35	L-gulonate 3-dehydrogenase; 3-hydroxyacyl-CoA dehydrogenase	Coil (COILS); IPR013328 (G3DSA:1.10.1040.GENE3D); IPR006108 (PFAM); IPR006176 (PFAM); G3DSA:3.40.50.720 (GENE3D); PTHR43492 (PANTHER); PTHR43492:SF2 (PANTHER); IPR008927 (SUPERFAMILY); IPR036291 (SUPERFAMILY)	F:GO:0003857; P:GO:0006631; F:GO:0016491; P:GO:0055114	F:3-hydroxyacyl-CoA dehydrogenase activity; P:fatty acid metabolic process; F:oxidoreductase activity; P:oxidation-reduction process
TRUE	[INTERPRO, BLASTED, MAPPED, GO-SLIM]	DERPT_G11313	: Full=L-carnitine dehydrogenase Short=CDH Short=L-CDH	469	20	4.21335e-107	56.76	14	C:GO:0005576; C:GO:0005730; C:GO:0005794; C:GO:0005829; C:GO:0005886; P:GO:0006520; P:GO:0006629; P:GO:0009056; P:GO:0009056; P:GO:0009058; P:GO:0009058; F:GO:0016491; P:GO:0034641; F:GO:0043167	C:extracellular region; C:nucleolus; C:Golgi apparatus; C:cytosol; C:plasma membrane; P:cellular amino acid metabolic process; P:lipid metabolic process; P:catabolic process; P:catabolic process; P:biosynthetic process; P:biosynthetic process; F:oxidoreductase activity; P:cellular nitrogen compound metabolic process; F:ion binding	EC:1.1.1.45; EC:1.1.1.35	L-gulonate 3-dehydrogenase; 3-hydroxyacyl-CoA dehydrogenase	Coil (COILS); IPR006108 (PFAM); IPR013328 (G3DSA:1.10.1040.GENE3D); G3DSA:3.40.50.720 (GENE3D); IPR006176 (PFAM); PTHR43492 (PANTHER); PTHR43492 (PANTHER); PTHR43492:SF2 (PANTHER); PTHR43492:SF2 (PANTHER); SIGNAL_PEPTIDE (PHOBIUS); SIGNAL_PEPTIDE_C_REGION (PHOBIUS); SIGNAL_PEPTIDE_N_REGION (PHOBIUS); SIGNAL_PEPTIDE_H_REGION (PHOBIUS); NON_CYTOPLASMIC_DOMAIN (PHOBIUS); IPR008927 (SUPERFAMILY); IPR…	F:GO:0003857; P:GO:0006631; F:GO:0016491; P:GO:0055114	F:3-hydroxyacyl-CoA dehydrogenase activity; P:fatty acid metabolic process; F:oxidoreductase activity; P:oxidation-reduction process
TRUE	[INTERPRO, BLASTED, MAPPED, GO-SLIM]	DERPT_G9506	: Full=Glucose-6-phosphate 1-dehydrogenase Short=G6PD	771	20	0	71.91	27	P:GO:0002376; P:GO:0003013; C:GO:0005576; C:GO:0005634; C:GO:0005815; C:GO:0005829; C:GO:0005886; P:GO:0005975; P:GO:0005975; P:GO:0006464; P:GO:0006629; P:GO:0006790; P:GO:0006950; P:GO:0008219; P:GO:0009058; P:GO:0009058; C:GO:0009536; F:GO:0016491; P:GO:0021700; P:GO:0030154; P:GO:0034641; P:GO:0040007; P:GO:0042592; P:GO:0044281; P:GO:0048856; P:GO:0051186; P:GO:0055085	P:immune system process; P:circulatory system process; C:extracellular region; C:nucleus; C:microtubule organizing center; C:cytosol; C:plasma membrane; P:carbohydrate metabolic process; P:carbohydrate metabolic process; P:cellular protein modification process; P:lipid metabolic process; P:sulfur compound metabolic process; P:response to stress; P:cell death; P:biosynthetic process; P:biosyntheti…	EC:1.1.1.49	Glucose-6-phosphate dehydrogenase (NADP(+))	IPR001282 (PRINTS); G3DSA:3.40.50.720 (GENE3D); IPR022674 (PFAM); IPR022675 (PFAM); G3DSA:3.30.360.10 (GENE3D); IPR001282 (TIGRFAM); mobidb-lite (MOBIDB_LITE); IPR001282 (PANTHER); PTHR23429:SF0 (PANTHER); IPR019796 (PROSITE_PATTERNS); IPR001282 (HAMAP); SSF55347 (SUPERFAMILY); IPR036291 (SUPERFAMILY)	F:GO:0004345; P:GO:0006006; F:GO:0050661; P:GO:0055114	F:glucose-6-phosphate dehydrogenase activity; P:glucose metabolic process; F:NADP binding; P:oxidation-reduction process
TRUE	[INTERPRO, BLASTED, MAPPED, GO-SLIM]	DERPT_G10985	: Full=Glucose-6-phosphate 1-dehydrogenase Short=G6PD	601	20	0	71.53	27	P:GO:0002376; P:GO:0003013; C:GO:0005576; C:GO:0005634; C:GO:0005815; C:GO:0005829; C:GO:0005886; P:GO:0005975; P:GO:0005975; P:GO:0006464; P:GO:0006629; P:GO:0006790; P:GO:0006950; P:GO:0008219; P:GO:0009058; P:GO:0009058; C:GO:0009536; F:GO:0016491; P:GO:0021700; P:GO:0030154; P:GO:0034641; P:GO:0040007; P:GO:0042592; P:GO:0044281; P:GO:0048856; P:GO:0051186; P:GO:0055085	P:immune system process; P:circulatory system process; C:extracellular region; C:nucleus; C:microtubule organizing center; C:cytosol; C:plasma membrane; P:carbohydrate metabolic process; P:carbohydrate metabolic process; P:cellular protein modification process; P:lipid metabolic process; P:sulfur compound metabolic process; P:response to stress; P:cell death; P:biosynthetic process; P:biosyntheti…	EC:1.1.1.49	Glucose-6-phosphate dehydrogenase (NADP(+))	IPR001282 (PRINTS); IPR022674 (PFAM); IPR001282 (TIGRFAM); G3DSA:3.30.360.10 (GENE3D); IPR022675 (PFAM); G3DSA:3.40.50.720 (GENE3D); mobidb-lite (MOBIDB_LITE); IPR001282 (PANTHER); PTHR23429:SF0 (PANTHER); IPR019796 (PROSITE_PATTERNS); IPR001282 (HAMAP); SSF55347 (SUPERFAMILY); IPR036291 (SUPERFAMILY)	F:GO:0004345; P:GO:0006006; F:GO:0050661; P:GO:0055114	F:glucose-6-phosphate dehydrogenase activity; P:glucose metabolic process; F:NADP binding; P:oxidation-reduction process
TRUE	[INTERPRO, BLASTED, MAPPED, GO-SLIM]	DERPT_G9343	: Full=Aerobic glycerol-3-phosphate dehydrogenase	728	20	0	64.12	17	C:GO:0005739; P:GO:0005975; P:GO:0005975; P:GO:0006091; P:GO:0006629; P:GO:0007568; P:GO:0009056; P:GO:0009056; P:GO:0009058; P:GO:0009058; F:GO:0016491; P:GO:0034641; P:GO:0040007; F:GO:0043167; P:GO:0044281; P:GO:0048856; P:GO:0051186	C:mitochondrion; P:carbohydrate metabolic process; P:carbohydrate metabolic process; P:generation of precursor metabolites and energy; P:lipid metabolic process; P:aging; P:catabolic process; P:catabolic process; P:biosynthetic process; P:biosynthetic process; F:oxidoreductase activity; P:cellular nitrogen compound metabolic process; P:growth; F:ion binding; P:small molecule metabolic process; P:…	EC:1.1.1.8; EC:1.1.5.3; EC:1.1.1.94	Glycerol-3-phosphate dehydrogenase (NAD(+)); Glycerol-3-phosphate dehydrogenase; Glycerol-3-phosphate dehydrogenase (NAD(P)(+))	Coil (COILS); IPR000447 (PRINTS); IPR002048 (SMART); G3DSA:3.30.9.10 (GENE3D); IPR038299 (G3DSA:1.10.8.GENE3D); IPR031656 (PFAM); G3DSA:1.10.238.10 (GENE3D); IPR006076 (PFAM); IPR036188 (G3DSA:3.50.50.GENE3D); IPR002048 (PFAM); PTHR11985:SF15 (PANTHER); IPR000447 (PANTHER); IPR000447 (PROSITE_PATTERNS); IPR000447 (PROSITE_PATTERNS); IPR018247 (PROSITE_PATTERNS); IPR002048 (PROSITE_PROFILES); IPR0…	F:GO:0004368; F:GO:0005509; P:GO:0006072; C:GO:0009331; F:GO:0016491; P:GO:0055114	F:glycerol-3-phosphate dehydrogenase (quinone) activity; F:calcium ion binding; P:glycerol-3-phosphate metabolic process; C:glycerol-3-phosphate dehydrogenase complex; F:oxidoreductase activity; P:oxidation-reduction process
TRUE	[INTERPRO, BLASTED, MAPPED, GO-SLIM]	DERPT_G7218	: Full=Glycerol-3-phosphate dehydrogenase	398	20	3.3753e-151	74.67	22	P:GO:0003013; C:GO:0005576; C:GO:0005739; C:GO:0005829; C:GO:0005886; P:GO:0005975; P:GO:0005975; P:GO:0006091; P:GO:0006464; P:GO:0006629; P:GO:0006950; P:GO:0007165; P:GO:0009056; P:GO:0009056; P:GO:0009058; P:GO:0009058; F:GO:0016491; P:GO:0034641; P:GO:0042592; P:GO:0044281; P:GO:0051186; P:GO:0055085	P:circulatory system process; C:extracellular region; C:mitochondrion; C:cytosol; C:plasma membrane; P:carbohydrate metabolic process; P:carbohydrate metabolic process; P:generation of precursor metabolites and energy; P:cellular protein modification process; P:lipid metabolic process; P:response to stress; P:signal transduction; P:catabolic process; P:catabolic process; P:biosynthetic process; P…	EC:1.1.1.8; EC:1.1.5.3; EC:1.1.1.94	Glycerol-3-phosphate dehydrogenase (NAD(+)); Glycerol-3-phosphate dehydrogenase; Glycerol-3-phosphate dehydrogenase (NAD(P)(+))	IPR006168 (PRINTS); IPR006168 (PIRSF); IPR006109 (PFAM); IPR017751 (TIGRFAM); G3DSA:3.40.50.720 (GENE3D); IPR013328 (G3DSA:1.10.1040.GENE3D); IPR011128 (PFAM); mobidb-lite (MOBIDB_LITE); PTHR11728 (PANTHER); PTHR11728:SF15 (PANTHER); IPR006168 (PROSITE_PATTERNS); SignalP-TM (SIGNALP_GRAM_POSITIVE); IPR036291 (SUPERFAMILY); IPR008927 (SUPERFAMILY)	F:GO:0004367; P:GO:0005975; P:GO:0006072; C:GO:0009331; F:GO:0016491; F:GO:0016616; F:GO:0042803; P:GO:0046168; F:GO:0051287; P:GO:0055114	F:glycerol-3-phosphate dehydrogenase [NAD+] activity; P:carbohydrate metabolic process; P:glycerol-3-phosphate metabolic process; C:glycerol-3-phosphate dehydrogenase complex; F:oxidoreductase activity; F:oxidoreductase activity, acting on the CH-OH group of donors, NAD or NADP as acceptor; F:protein homodimerization activity; P:glycerol-3-phosphate catabolic process; F:NAD binding; P:oxidation-r…
TRUE	[INTERPRO, BLASTED, MAPPED, GO-SLIM]	DERPT_G7520	: Full=D-3-phosphoglycerate dehydrogenase Short=3-PGDH ame: Full=2-oxoglutarate reductase ame: Full=Malate dehydrogenase	521	20	1.46496e-141	61.96	14	P:GO:0000003; C:GO:0005634; C:GO:0005739; C:GO:0005829; P:GO:0006520; P:GO:0006790; P:GO:0007049; P:GO:0009058; P:GO:0009058; C:GO:0009536; P:GO:0009790; F:GO:0016491; P:GO:0030154; F:GO:0043167	P:reproduction; C:nucleus; C:mitochondrion; C:cytosol; P:cellular amino acid metabolic process; P:sulfur compound metabolic process; P:cell cycle; P:biosynthetic process; P:biosynthetic process; C:plastid; P:embryo development; F:oxidoreductase activity; P:cell differentiation; F:ion binding	EC:1.1.1.95	Phosphoglycerate dehydrogenase	IPR006139 (PFAM); IPR006236 (TIGRFAM); G3DSA:3.40.50.720 (GENE3D); IPR006140 (PFAM); G3DSA:3.40.50.720 (GENE3D); PTHR42938:SF5 (PANTHER); PTHR42938 (PANTHER); IPR029753 (PROSITE_PATTERNS); IPR029752 (PROSITE_PATTERNS); IPR029753 (PROSITE_PATTERNS); cd12173 (CDD); SSF52283 (SUPERFAMILY); IPR029009 (SUPERFAMILY); IPR036291 (SUPERFAMILY)	F:GO:0004617; P:GO:0006564; P:GO:0008152; F:GO:0016616; F:GO:0051287; P:GO:0055114	F:phosphoglycerate dehydrogenase activity; P:L-serine biosynthetic process; P:metabolic process; F:oxidoreductase activity, acting on the CH-OH group of donors, NAD or NADP as acceptor; F:NAD binding; P:oxidation-reduction process
TRUE	[INTERPRO, BLASTED, MAPPED, GO-SLIM]	DERPT_G285	: Full=D-2-hydroxyglutarate mitochondrial Flags: Precursor	510	20	9.26528e-159	50.8	8	C:GO:0005739; P:GO:0009056; P:GO:0009056; P:GO:0009058; P:GO:0009058; F:GO:0016491; F:GO:0043167; P:GO:0044281	C:mitochondrion; P:catabolic process; P:catabolic process; P:biosynthetic process; P:biosynthetic process; F:oxidoreductase activity; F:ion binding; P:small molecule metabolic process	EC:1.1.2.4; EC:1.1.3.15; EC:1.1.99.14; EC:1.1.1.28	D-lactate dehydrogenase (cytochrome); (S)-2-hydroxy-acid oxidase; Glycolate dehydrogenase; D-lactate dehydrogenase	IPR006094 (PFAM); G3DSA:3.30.465.40 (GENE3D); IPR016171 (G3DSA:1.10.45.GENE3D); IPR004113 (PFAM); G3DSA:3.30.70.2740 (GENE3D); PTHR11748:SF111 (PANTHER); PTHR11748 (PANTHER); IPR016166 (PROSITE_PROFILES); IPR036318 (SUPERFAMILY); IPR016164 (SUPERFAMILY)	F:GO:0003824; F:GO:0016491; F:GO:0016614; F:GO:0050660; P:GO:0055114	F:catalytic activity; F:oxidoreductase activity; F:oxidoreductase activity, acting on CH-OH group of donors; F:flavin adenine dinucleotide binding; P:oxidation-reduction process
TRUE	[INTERPRO, BLASTED, MAPPED, GO-SLIM]	DERPT_G11400	: Full=D-2-hydroxyglutarate mitochondrial Flags: Precursor	1503	20	1.25749e-133	67.32	16	F:GO:0003677; F:GO:0003729; C:GO:0005634; C:GO:0005739; P:GO:0006397; F:GO:0008092; P:GO:0009056; P:GO:0009056; P:GO:0009058; P:GO:0009058; F:GO:0016491; P:GO:0030154; P:GO:0040007; F:GO:0043167; P:GO:0044281; P:GO:0048856	F:DNA binding; F:mRNA binding; C:nucleus; C:mitochondrion; P:mRNA processing; F:cytoskeletal protein binding; P:catabolic process; P:catabolic process; P:biosynthetic process; P:biosynthetic process; F:oxidoreductase activity; P:cell differentiation; P:growth; F:ion binding; P:small molecule metabolic process; P:anatomical structure development	EC:1.1.2.4; EC:1.1.99.2	D-lactate dehydrogenase (cytochrome); L-2-hydroxyglutarate dehydrogenase	IPR000504 (SMART); G3DSA:1.10.720.60 (GENE3D); G3DSA:3.30.465.10 (GENE3D); IPR006094 (PFAM); G3DSA:3.30.70.2740 (GENE3D); IPR012677 (G3DSA:3.30.70.GENE3D); G3DSA:3.30.70.2190 (GENE3D); IPR016171 (G3DSA:1.10.45.GENE3D); IPR023214 (G3DSA:3.40.50.GENE3D); IPR004113 (PFAM); IPR000504 (PFAM); IPR016167 (G3DSA:3.30.43.GENE3D); mobidb-lite (MOBIDB_LITE); mobidb-lite (MOBIDB_LITE); mobidb-lite (MOBIDB_LI…	F:GO:0003676; F:GO:0003723; F:GO:0003824; F:GO:0016491; F:GO:0016614; F:GO:0050660; P:GO:0055114	F:nucleic acid binding; F:RNA binding; F:catalytic activity; F:oxidoreductase activity; F:oxidoreductase activity, acting on CH-OH group of donors; F:flavin adenine dinucleotide binding; P:oxidation-reduction process
TRUE	[INTERPRO, BLASTED, MAPPED, GO-SLIM]	DERPT_G9183	: Full=Hydroxyacid oxidase 1 Short=HAOX1 ame: Full=Glycolate oxidase Short=GOX	394	20	2.46627e-129	67.04	18	P:GO:0002376; C:GO:0005576; C:GO:0005634; C:GO:0005739; C:GO:0005773; C:GO:0005777; C:GO:0005829; C:GO:0005840; P:GO:0006629; P:GO:0006950; P:GO:0007165; P:GO:0009056; P:GO:0009056; P:GO:0009058; C:GO:0009536; F:GO:0016491; F:GO:0043167; P:GO:0044281	P:immune system process; C:extracellular region; C:nucleus; C:mitochondrion; C:vacuole; C:peroxisome; C:cytosol; C:ribosome; P:lipid metabolic process; P:response to stress; P:signal transduction; P:catabolic process; P:catabolic process; P:biosynthetic process; C:plastid; F:oxidoreductase activity; F:ion binding; P:small molecule metabolic process	EC:1.1.3.15	(S)-2-hydroxy-acid oxidase	IPR012133 (PIRSF); IPR013785 (G3DSA:3.20.20.GENE3D); IPR000262 (PFAM); mobidb-lite (MOBIDB_LITE); PTHR10578 (PANTHER); IPR008259 (PROSITE_PATTERNS); IPR037396 (PROSITE_PROFILES); IPR012133 (CDD); SSF51395 (SUPERFAMILY)	F:GO:0003824; F:GO:0010181; F:GO:0016491; P:GO:0055114	F:catalytic activity; F:FMN binding; F:oxidoreductase activity; P:oxidation-reduction process
TRUE	[INTERPRO, BLASTED, MAPPED, GO-SLIM]	DERPT_G165	: Full=L-2-hydroxyglutarate mitochondrial Flags: Precursor	663	20	2.12227e-164	59.84	2	C:GO:0005739; F:GO:0016491	C:mitochondrion; F:oxidoreductase activity	EC:1.1.99.2	L-2-hydroxyglutarate dehydrogenase	G3DSA:3.40.30.10 (GENE3D); IPR004046 (PFAM); IPR006076 (PFAM); IPR004045 (PFAM); G3DSA:1.20.1050.10 (GENE3D),SFLDS00019 (SFLD),SFLDG00358 (SFLD); PTHR43104 (PANTHER); PTHR43104:SF2 (PANTHER); IPR004045 (PROSITE_PROFILES); IPR010987 (PROSITE_PROFILES); IPR036249 (SUPERFAMILY); IPR036188 (SUPERFAMILY); IPR036282 (SUPERFAMILY)	F:GO:0005515; F:GO:0016491; P:GO:0055114	F:protein binding; F:oxidoreductase activity; P:oxidation-reduction process
TRUE	[INTERPRO, BLASTED, MAPPED, GO-SLIM]	DERPT_G6237	: Full=Cytochrome b-c1 complex subunit mitochondrial ame: Full=Complex III subunit 5 ame: Full=Cytochrome b-c1 complex subunit 5 ame: Full=Rieske iron-sulfur Short=RISP ame: Full=Rieske UQCRFS1 ame: Full=Ubiquinol-cytochrome c reductase iron-sulfur subunit Contains: ame: Full=Cytochrome b-c1 complex subunit 9 Short=Su9 Short=Subunit 9 ame: Full=8 kDa subunit 9 ame: Full=Complex III subunit IX ame…	285	20	2.36578e-92	73.56	16	F:GO:0005198; C:GO:0005635; C:GO:0005739; C:GO:0005829; P:GO:0006091; P:GO:0006605; P:GO:0006913; P:GO:0006950; F:GO:0016491; F:GO:0022857; F:GO:0022857; F:GO:0022857; C:GO:0032991; P:GO:0034641; P:GO:0044281; P:GO:0051276	F:structural molecule activity; C:nuclear envelope; C:mitochondrion; C:cytosol; P:generation of precursor metabolites and energy; P:protein targeting; P:nucleocytoplasmic transport; P:response to stress; F:oxidoreductase activity; F:transmembrane transporter activity; F:transmembrane transporter activity; F:transmembrane transporter activity; C:protein-containing complex; P:cellular nitrogen comp…	EC:1.10.2; EC:1.10.2.2	Acting on diphenols and related substances as donors; Quinol--cytochrome-c reductase	IPR005805 (PRINTS); IPR036922 (G3DSA:2.102.10.GENE3D); IPR004192 (PFAM); IPR037008 (G3DSA:1.20.5.GENE3D); IPR017941 (PFAM); IPR006317 (TIGRFAM); IPR014349 (PANTHER); PTHR10134:SF13 (PANTHER); IPR017941 (PROSITE_PROFILES); cd03470 (CDD); SSF81502 (SUPERFAMILY); IPR036922 (SUPERFAMILY)	F:GO:0008121; C:GO:0016020; F:GO:0016491; F:GO:0016679; F:GO:0051537; P:GO:0055114	F:ubiquinol-cytochrome-c reductase activity; C:membrane; F:oxidoreductase activity; F:oxidoreductase activity, acting on diphenols and related substances as donors; F:2 iron, 2 sulfur cluster binding; P:oxidation-reduction process
TRUE	[INTERPRO, BLASTED, MAPPED, GO-SLIM]	DERPT_G10287	: Full=Cytochrome b-c1 complex subunit 8 ame: Full=Complex III subunit 8 ame: Full=Complex III subunit VIII ame: Full=Ubiquinol-cytochrome c reductase complex kDa ame: Full=Ubiquinol-cytochrome c reductase complex ubiquinone-binding QP-C	83	7	2.04034e-21	60.54	11	C:GO:0005739; P:GO:0006091; F:GO:0016491; F:GO:0022857; F:GO:0022857; F:GO:0022857; P:GO:0030154; C:GO:0032991; P:GO:0034641; P:GO:0044281; P:GO:0048856	C:mitochondrion; P:generation of precursor metabolites and energy; F:oxidoreductase activity; F:transmembrane transporter activity; F:transmembrane transporter activity; F:transmembrane transporter activity; P:cell differentiation; C:protein-containing complex; P:cellular nitrogen compound metabolic process; P:small molecule metabolic process; P:anatomical structure development	EC:1.10.2; EC:1.10.2.2	Acting on diphenols and related substances as donors; Quinol--cytochrome-c reductase	IPR004205 (PFAM); IPR036642 (G3DSA:1.20.5.GENE3D); IPR004205 (PANTHER); TRANSMEMBRANE (PHOBIUS); CYTOPLASMIC_DOMAIN (PHOBIUS); NON_CYTOPLASMIC_DOMAIN (PHOBIUS); IPR004205 (PRODOM); IPR036642 (SUPERFAMILY)	F:GO:0008121	F:ubiquinol-cytochrome-c reductase activity
TRUE	[INTERPRO, BLASTED, MAPPED, GO-SLIM]	DERPT_G2607	: Full=Alternative mitochondrial Flags: Precursor	444	20	2.19049e-58	65.03	2	C:GO:0005739; F:GO:0016491	C:mitochondrion; F:oxidoreductase activity	EC:1.10.3	Acting on diphenols and related substances as donors	Coil (COILS); IPR038659 (G3DSA:1.20.1260.GENE3D); IPR002680 (PFAM); PTHR31803:SF3 (PANTHER); IPR002680 (PANTHER)	F:GO:0009916; P:GO:0055114	F:alternative oxidase activity; P:oxidation-reduction process
TRUE	[INTERPRO, BLASTED, MAPPED, GO-SLIM]	DERPT_G9892	: Full=Peroxidasin homolog Flags: Precursor	1867	20	2.92181e-108	52.96	16	P:GO:0000003; P:GO:0002376; C:GO:0005576; C:GO:0005737; P:GO:0006950; P:GO:0009058; P:GO:0009058; P:GO:0016192; F:GO:0016491; P:GO:0030154; P:GO:0030198; P:GO:0040011; C:GO:0043226; P:GO:0044281; P:GO:0048646; P:GO:0048856	P:reproduction; P:immune system process; C:extracellular region; C:cytoplasm; P:response to stress; P:biosynthetic process; P:biosynthetic process; P:vesicle-mediated transport; F:oxidoreductase activity; P:cell differentiation; P:extracellular matrix organization; P:locomotion; C:organelle; P:small molecule metabolic process; P:anatomical structure formation involved in morphogenesis; P:anatomic…	EC:1.11.1.7	Peroxidase	IPR019791 (PRINTS); IPR037120 (G3DSA:1.10.640.GENE3D); IPR019791 (PFAM); mobidb-lite (MOBIDB_LITE); PTHR11475:SF82 (PANTHER); PTHR11475 (PANTHER); PTHR11475 (PANTHER); TRANSMEMBRANE (PHOBIUS); TRANSMEMBRANE (PHOBIUS); TRANSMEMBRANE (PHOBIUS); NON_CYTOPLASMIC_DOMAIN (PHOBIUS); NON_CYTOPLASMIC_DOMAIN (PHOBIUS); TRANSMEMBRANE (PHOBIUS); TRANSMEMBRANE (PHOBIUS); CYTOPLASMIC_DOMAIN (PHOBIUS); TRANSMEM…	F:GO:0004601; P:GO:0006979; F:GO:0020037; P:GO:0055114	F:peroxidase activity; P:response to oxidative stress; F:heme binding; P:oxidation-reduction process
TRUE	[INTERPRO, BLASTED, MAPPED, GO-SLIM]	DERPT_G8945	: Full=Peroxidasin homolog Flags: Precursor	1515	20	5.89675e-122	53.18	18	P:GO:0000003; P:GO:0002376; C:GO:0005615; C:GO:0005737; P:GO:0006464; P:GO:0006950; P:GO:0009058; P:GO:0009058; P:GO:0016192; F:GO:0016491; P:GO:0030154; P:GO:0030198; P:GO:0040011; F:GO:0043167; C:GO:0043226; P:GO:0044281; P:GO:0048646; P:GO:0048856	P:reproduction; P:immune system process; C:extracellular space; C:cytoplasm; P:cellular protein modification process; P:response to stress; P:biosynthetic process; P:biosynthetic process; P:vesicle-mediated transport; F:oxidoreductase activity; P:cell differentiation; P:extracellular matrix organization; P:locomotion; F:ion binding; C:organelle; P:small molecule metabolic process; P:anatomical st…	EC:1.11.1.7	Peroxidase	IPR019791 (PRINTS); IPR037120 (G3DSA:1.10.640.GENE3D); IPR019791 (PFAM); PTHR11475 (PANTHER); PTHR11475:SF107 (PANTHER); PTHR11475 (PANTHER); PTHR11475:SF107 (PANTHER); SIGNAL_PEPTIDE_H_REGION (PHOBIUS); SIGNAL_PEPTIDE (PHOBIUS); NON_CYTOPLASMIC_DOMAIN (PHOBIUS); SIGNAL_PEPTIDE_C_REGION (PHOBIUS); SIGNAL_PEPTIDE_N_REGION (PHOBIUS); IPR019791 (PROSITE_PROFILES); IPR019791 (PROSITE_PROFILES); cd098…	F:GO:0004601; P:GO:0006979; F:GO:0020037; P:GO:0055114	F:peroxidase activity; P:response to oxidative stress; F:heme binding; P:oxidation-reduction process
TRUE	[INTERPRO, BLASTED, MAPPED, GO-SLIM]	DERPT_G821	: Full=Aspartate--tRNA(Asp Asn) ligase ame: Full=Aspartyl-tRNA synthetase Short= ame: Full=Non-discriminating aspartyl-tRNA synthetase Short=ND-	2289	20	5.67621e-149	56.55	8	C:GO:0005739; P:GO:0006399; P:GO:0006412; P:GO:0006520; P:GO:0006950; F:GO:0016491; F:GO:0016874; F:GO:0043167	C:mitochondrion; P:tRNA metabolic process; P:translation; P:cellular amino acid metabolic process; P:response to stress; F:oxidoreductase activity; F:ligase activity; F:ion binding	EC:1.11.1.7	Peroxidase	Coil (COILS); Coil (COILS); Coil (COILS); IPR019791 (PRINTS); G3DSA:3.30.930.10 (GENE3D); G3DSA:2.40.50.140 (GENE3D); IPR004364 (PFAM); IPR004524 (TIGRFAM); IPR037120 (G3DSA:1.10.640.GENE3D); IPR004115 (G3DSA:3.30.1360.GENE3D); IPR019130 (PFAM); IPR019791 (PFAM); mobidb-lite (MOBIDB_LITE); mobidb-lite (MOBIDB_LITE); mobidb-lite (MOBIDB_LITE); mobidb-lite (MOBIDB_LITE); mobidb-lite (MOBIDB_LITE); …	F:GO:0000166; F:GO:0004601; F:GO:0004812; F:GO:0005524; C:GO:0005737; P:GO:0006418; P:GO:0006979; C:GO:0016021; F:GO:0016874; F:GO:0020037; P:GO:0055114	F:nucleotide binding; F:peroxidase activity; F:aminoacyl-tRNA ligase activity; F:ATP binding; C:cytoplasm; P:tRNA aminoacylation for protein translation; P:response to oxidative stress; C:integral component of membrane; F:ligase activity; F:heme binding; P:oxidation-reduction process
TRUE	[INTERPRO, BLASTED, MAPPED, GO-SLIM]	DERPT_G5807	: Full=Peroxidasin homolog Flags: Precursor	1327	20	1.67381e-106	51.08	14	P:GO:0000003; P:GO:0002376; C:GO:0005576; C:GO:0005737; P:GO:0006950; P:GO:0009058; P:GO:0009058; F:GO:0016491; P:GO:0030154; F:GO:0043167; C:GO:0043226; P:GO:0044281; P:GO:0048646; P:GO:0048856	P:reproduction; P:immune system process; C:extracellular region; C:cytoplasm; P:response to stress; P:biosynthetic process; P:biosynthetic process; F:oxidoreductase activity; P:cell differentiation; F:ion binding; C:organelle; P:small molecule metabolic process; P:anatomical structure formation involved in morphogenesis; P:anatomical structure development	EC:1.11.1.7	Peroxidase	Coil (COILS); IPR019791 (PRINTS); IPR019791 (PFAM); IPR037120 (G3DSA:1.10.640.GENE3D); mobidb-lite (MOBIDB_LITE); mobidb-lite (MOBIDB_LITE); PTHR11475:SF106 (PANTHER); PTHR11475 (PANTHER); CYTOPLASMIC_DOMAIN (PHOBIUS); CYTOPLASMIC_DOMAIN (PHOBIUS); TRANSMEMBRANE (PHOBIUS); TRANSMEMBRANE (PHOBIUS); NON_CYTOPLASMIC_DOMAIN (PHOBIUS); IPR019791 (PROSITE_PROFILES); cd09823 (CDD); IPR010255 (SUPERFAMIL…	F:GO:0004601; P:GO:0006979; F:GO:0020037; P:GO:0055114	F:peroxidase activity; P:response to oxidative stress; F:heme binding; P:oxidation-reduction process
TRUE	[INTERPRO, BLASTED, MAPPED, GO-SLIM]	DERPT_G3449	: Full=Neuroglobin	155	20	1.57947e-16	50.7	3	C:GO:0005623; P:GO:0006950; F:GO:0016491	C:cell; P:response to stress; F:oxidoreductase activity	EC:1.11.1.7	Peroxidase	IPR000971 (PFAM); IPR012292 (G3DSA:1.10.490.GENE3D); PTHR11442 (PANTHER); PTHR11442:SF36 (PANTHER); IPR000971 (PROSITE_PROFILES); cd01040 (CDD); IPR009050 (SUPERFAMILY)	F:GO:0019825; F:GO:0020037	F:oxygen binding; F:heme binding
TRUE	[INTERPRO, BLASTED, MAPPED, GO-SLIM]	DERPT_G10749	: Full=Thyroid peroxidase Short=TPO Flags: Precursor	3350	20	8.45483e-143	52.49	9	P:GO:0002376; C:GO:0005615; C:GO:0005739; P:GO:0006950; P:GO:0009058; F:GO:0016491; F:GO:0030234; F:GO:0043167; P:GO:0044281	P:immune system process; C:extracellular space; C:mitochondrion; P:response to stress; P:biosynthetic process; F:oxidoreductase activity; F:enzyme regulator activity; F:ion binding; P:small molecule metabolic process	EC:1.11.1.7	Peroxidase	Coil (COILS); IPR019791 (PRINTS); IPR003599 (SMART); IPR003591 (SMART); IPR009048 (SMART); IPR011625 (SMART); IPR001599 (SMART); IPR003598 (SMART); IPR013783 (G3DSA:2.60.40.GENE3D); IPR032675 (G3DSA:3.80.10.GENE3D); G3DSA:2.60.40.1930 (GENE3D); IPR001599 (PFAM); IPR009048 (PFAM); IPR036595 (G3DSA:2.60.40.GENE3D); IPR001611 (PFAM); IPR013783 (G3DSA:2.60.40.GENE3D); IPR019355 (PFAM); G3DSA:1.20.50.…	F:GO:0004601; F:GO:0004866; F:GO:0005515; C:GO:0005576; C:GO:0005615; P:GO:0006979; F:GO:0020037; P:GO:0055114	F:peroxidase activity; F:endopeptidase inhibitor activity; F:protein binding; C:extracellular region; C:extracellular space; P:response to oxidative stress; F:heme binding; P:oxidation-reduction process
TRUE	[INTERPRO, BLASTED, MAPPED, GO-SLIM]	DERPT_G10504	: Full=Peroxidasin homolog Flags: Precursor	933	20	5.37659e-114	50.51	15	P:GO:0000003; P:GO:0002376; C:GO:0005576; C:GO:0005737; P:GO:0006950; P:GO:0009058; P:GO:0009058; F:GO:0016491; P:GO:0030154; P:GO:0040011; F:GO:0043167; C:GO:0043226; P:GO:0044281; P:GO:0048646; P:GO:0048856	P:reproduction; P:immune system process; C:extracellular region; C:cytoplasm; P:response to stress; P:biosynthetic process; P:biosynthetic process; F:oxidoreductase activity; P:cell differentiation; P:locomotion; F:ion binding; C:organelle; P:small molecule metabolic process; P:anatomical structure formation involved in morphogenesis; P:anatomical structure development	EC:1.11.1.7	Peroxidase	IPR019791 (PRINTS); IPR037120 (G3DSA:1.10.640.GENE3D); IPR019791 (PFAM); PTHR11475 (PANTHER); PTHR11475:SF82 (PANTHER); IPR019791 (PROSITE_PROFILES); cd09823 (CDD); IPR010255 (SUPERFAMILY)	F:GO:0004601; P:GO:0006979; F:GO:0020037; P:GO:0055114	F:peroxidase activity; P:response to oxidative stress; F:heme binding; P:oxidation-reduction process
TRUE	[INTERPRO, BLASTED, MAPPED, GO-SLIM]	DERPT_G603	: Full=Phospholipid hydroperoxide glutathione mitochondrial Short=PHGPx ame: Full=Glutathione peroxidase 4 Short=GPx-4 Short=GSHPx-4 Flags: Precursor	230	20	4.03329e-63	71.23	15	P:GO:0000003; P:GO:0002376; C:GO:0005576; C:GO:0005635; C:GO:0005739; C:GO:0005829; C:GO:0005886; P:GO:0006790; P:GO:0006810; P:GO:0006950; C:GO:0009536; F:GO:0016491; P:GO:0034641; P:GO:0048856; P:GO:0051276	P:reproduction; P:immune system process; C:extracellular region; C:nuclear envelope; C:mitochondrion; C:cytosol; C:plasma membrane; P:sulfur compound metabolic process; P:transport; P:response to stress; C:plastid; F:oxidoreductase activity; P:cellular nitrogen compound metabolic process; P:anatomical structure development; P:chromosome organization	EC:1.11.1.9; EC:1.11.1.12; EC:1.11.1.7	Glutathione peroxidase; Phospholipid-hydroperoxide glutathione peroxidase; Peroxidase	IPR000889 (PRINTS); IPR000889 (PIRSF); G3DSA:3.40.30.10 (GENE3D); IPR000889 (PFAM); IPR000889 (PANTHER); PTHR11592:SF78 (PANTHER); IPR029759 (PROSITE_PATTERNS); IPR000889 (PROSITE_PROFILES); IPR000889 (CDD); IPR036249 (SUPERFAMILY)	F:GO:0004602; P:GO:0006979; P:GO:0055114	F:glutathione peroxidase activity; P:response to oxidative stress; P:oxidation-reduction process
TRUE	[INTERPRO, BLASTED, MAPPED, GO-SLIM]	DERPT_G7316	: Full=Glutathione peroxidase 3 Short=GPx-3 Short=GSHPx-3 ame: Full=Plasma glutathione peroxidase Short=GPx-P Short=GSHPx-P Flags: Precursor	283	20	3.31074e-37	59.34	23	P:GO:0002376; P:GO:0003013; C:GO:0005615; C:GO:0005739; C:GO:0005886; P:GO:0006464; P:GO:0006629; P:GO:0006790; P:GO:0006950; P:GO:0007165; P:GO:0008219; P:GO:0008283; P:GO:0009056; F:GO:0016491; P:GO:0030154; P:GO:0034641; P:GO:0040007; P:GO:0042592; P:GO:0044403; P:GO:0048646; P:GO:0048856; P:GO:0048870; P:GO:0050877	P:immune system process; P:circulatory system process; C:extracellular space; C:mitochondrion; C:plasma membrane; P:cellular protein modification process; P:lipid metabolic process; P:sulfur compound metabolic process; P:response to stress; P:signal transduction; P:cell death; P:cell proliferation; P:catabolic process; F:oxidoreductase activity; P:cell differentiation; P:cellular nitrogen compoun…	EC:1.11.1.9; EC:1.11.1.7	Glutathione peroxidase; Peroxidase	IPR000889 (PRINTS); G3DSA:3.40.30.10 (GENE3D); IPR000889 (PFAM); PTHR11592:SF45 (PANTHER); IPR000889 (PANTHER); IPR000889 (PROSITE_PROFILES); IPR036249 (SUPERFAMILY)	F:GO:0004602; P:GO:0006979; P:GO:0055114	F:glutathione peroxidase activity; P:response to oxidative stress; P:oxidation-reduction process
TRUE	[INTERPRO, BLASTED, MAPPED, GO-SLIM]	DERPT_G3000	: Full=Phospholipid hydroperoxide glutathione mitochondrial Short=PHGPx ame: Full=Glutathione peroxidase 4 Short=GPx-4 Short=GSHPx-4 Flags: Precursor	221	20	7.2274e-60	71.37	12	P:GO:0000003; C:GO:0005576; C:GO:0005635; C:GO:0005739; C:GO:0005829; C:GO:0005886; P:GO:0006790; P:GO:0006950; C:GO:0009536; F:GO:0016491; P:GO:0034641; P:GO:0051276	P:reproduction; C:extracellular region; C:nuclear envelope; C:mitochondrion; C:cytosol; C:plasma membrane; P:sulfur compound metabolic process; P:response to stress; C:plastid; F:oxidoreductase activity; P:cellular nitrogen compound metabolic process; P:chromosome organization	EC:1.11.1.9; EC:1.11.1.7	Glutathione peroxidase; Peroxidase	IPR000889 (PRINTS); IPR000889 (PFAM); IPR000889 (PIRSF); G3DSA:3.40.30.10 (GENE3D); mobidb-lite (MOBIDB_LITE); mobidb-lite (MOBIDB_LITE); IPR000889 (PANTHER); PTHR11592:SF76 (PANTHER); IPR029759 (PROSITE_PATTERNS); IPR000889 (PROSITE_PROFILES); IPR000889 (CDD); IPR036249 (SUPERFAMILY)	F:GO:0004602; P:GO:0006979; P:GO:0055114	F:glutathione peroxidase activity; P:response to oxidative stress; P:oxidation-reduction process
TRUE	[INTERPRO, BLASTED, MAPPED, GO-SLIM]	DERPT_G3636	: Full=Peroxiredoxin-2	222	20	4.07055e-101	82.5	31	P:GO:0000003; P:GO:0002376; C:GO:0005615; C:GO:0005634; C:GO:0005739; C:GO:0005768; C:GO:0005783; C:GO:0005829; P:GO:0006457; P:GO:0006464; P:GO:0006520; P:GO:0006605; P:GO:0006913; P:GO:0006950; P:GO:0007005; P:GO:0007155; P:GO:0007155; P:GO:0007165; P:GO:0008219; P:GO:0008283; P:GO:0009056; P:GO:0009058; F:GO:0016491; F:GO:0019899; P:GO:0030154; P:GO:0030198; F:GO:0030234; P:GO:0034641; P:GO:00…	P:reproduction; P:immune system process; C:extracellular space; C:nucleus; C:mitochondrion; C:endosome; C:endoplasmic reticulum; C:cytosol; P:protein folding; P:cellular protein modification process; P:cellular amino acid metabolic process; P:protein targeting; P:nucleocytoplasmic transport; P:response to stress; P:mitochondrion organization; P:cell adhesion; P:cell adhesion; P:signal transductio…	EC:1.11.1; EC:1.11.1.15; EC:1.11.1.7	Acting on a peroxide as acceptor; Peroxiredoxin; Peroxidase	IPR000866 (PFAM); G3DSA:3.40.30.10 (GENE3D); IPR019479 (PFAM); IPR024706 (PIRSF); PTHR10681 (PANTHER); PTHR10681:SF127 (PANTHER); IPR013766 (PROSITE_PROFILES); cd03015 (CDD); IPR036249 (SUPERFAMILY)	F:GO:0016209; F:GO:0016491; P:GO:0045454; F:GO:0051920; P:GO:0055114	F:antioxidant activity; F:oxidoreductase activity; P:cell redox homeostasis; F:peroxiredoxin activity; P:oxidation-reduction process
TRUE	[INTERPRO, BLASTED, MAPPED, GO-SLIM]	DERPT_G4655	: Full=Peroxiredoxin-1	274	20	9.53366e-59	61.85	30	P:GO:0000003; P:GO:0002376; C:GO:0005576; C:GO:0005634; C:GO:0005739; C:GO:0005829; C:GO:0005856; P:GO:0005975; P:GO:0005975; P:GO:0006464; P:GO:0006605; P:GO:0006790; P:GO:0006913; P:GO:0006950; P:GO:0007155; P:GO:0007155; P:GO:0007165; P:GO:0007568; P:GO:0008219; P:GO:0008283; P:GO:0009056; P:GO:0009058; F:GO:0016491; P:GO:0030154; C:GO:0032991; P:GO:0034641; P:GO:0042592; P:GO:0044281; P:GO:00…	P:reproduction; P:immune system process; C:extracellular region; C:nucleus; C:mitochondrion; C:cytosol; C:cytoskeleton; P:carbohydrate metabolic process; P:carbohydrate metabolic process; P:cellular protein modification process; P:protein targeting; P:sulfur compound metabolic process; P:nucleocytoplasmic transport; P:response to stress; P:cell adhesion; P:cell adhesion; P:signal transduction; P:…	EC:1.11.1; EC:1.11.1.15; EC:1.11.1.9; EC:1.11.1.7	Acting on a peroxide as acceptor; Peroxiredoxin; Glutathione peroxidase; Peroxidase	IPR000866 (PFAM); IPR019479 (PFAM); IPR024706 (PIRSF); G3DSA:3.40.30.10 (GENE3D); PTHR10681 (PANTHER); PTHR10681:SF102 (PANTHER); IPR013766 (PROSITE_PROFILES); cd03015 (CDD); IPR036249 (SUPERFAMILY)	F:GO:0016209; F:GO:0016491; P:GO:0045454; F:GO:0051920; P:GO:0055114	F:antioxidant activity; F:oxidoreductase activity; P:cell redox homeostasis; F:peroxiredoxin activity; P:oxidation-reduction process
TRUE	[INTERPRO, BLASTED, MAPPED, GO-SLIM]	DERPT_G3691	: Full=Peroxiredoxin-2	264	20	3.67051e-121	79.34	38	P:GO:0000003; P:GO:0002376; C:GO:0005615; C:GO:0005634; C:GO:0005739; C:GO:0005768; C:GO:0005783; C:GO:0005829; C:GO:0005856; P:GO:0005975; P:GO:0005975; P:GO:0006457; P:GO:0006464; P:GO:0006520; P:GO:0006605; P:GO:0006790; P:GO:0006913; P:GO:0006950; P:GO:0007005; P:GO:0007155; P:GO:0007155; P:GO:0007165; P:GO:0007568; P:GO:0008219; P:GO:0008283; P:GO:0009056; P:GO:0009058; F:GO:0016491; F:GO:00…	P:reproduction; P:immune system process; C:extracellular space; C:nucleus; C:mitochondrion; C:endosome; C:endoplasmic reticulum; C:cytosol; C:cytoskeleton; P:carbohydrate metabolic process; P:carbohydrate metabolic process; P:protein folding; P:cellular protein modification process; P:cellular amino acid metabolic process; P:protein targeting; P:sulfur compound metabolic process; P:nucleocytoplas…	EC:1.11.1; EC:1.11.1.15; EC:1.11.1.9; EC:1.11.1.7	Acting on a peroxide as acceptor; Peroxiredoxin; Glutathione peroxidase; Peroxidase	IPR019479 (PFAM); IPR000866 (PFAM); IPR024706 (PIRSF); G3DSA:3.40.30.10 (GENE3D); PTHR10681 (PANTHER); PTHR10681:SF102 (PANTHER); NON_CYTOPLASMIC_DOMAIN (PHOBIUS); SIGNAL_PEPTIDE (PHOBIUS); SIGNAL_PEPTIDE_H_REGION (PHOBIUS); SIGNAL_PEPTIDE_N_REGION (PHOBIUS); SIGNAL_PEPTIDE_C_REGION (PHOBIUS); IPR013766 (PROSITE_PROFILES); cd03015 (CDD); SignalP-noTM (SIGNALP_EUK); IPR036249 (SUPERFAMILY); TMheli…	F:GO:0016209; F:GO:0016491; P:GO:0045454; F:GO:0051920; P:GO:0055114	F:antioxidant activity; F:oxidoreductase activity; P:cell redox homeostasis; F:peroxiredoxin activity; P:oxidation-reduction process
TRUE	[INTERPRO, BLASTED, MAPPED, GO-SLIM]	DERPT_G3346	: Full=Peroxiredoxin-1	292	20	1.92666e-109	83.48	37	P:GO:0000003; C:GO:0000228; P:GO:0002376; C:GO:0005615; C:GO:0005730; C:GO:0005739; C:GO:0005777; C:GO:0005783; C:GO:0005829; C:GO:0005856; P:GO:0005975; P:GO:0005975; P:GO:0006457; P:GO:0006464; P:GO:0006520; P:GO:0006605; P:GO:0006790; P:GO:0006913; P:GO:0006950; P:GO:0007155; P:GO:0007155; P:GO:0007165; P:GO:0007568; P:GO:0008219; P:GO:0008283; P:GO:0009056; P:GO:0009058; F:GO:0016491; P:GO:00…	P:reproduction; C:nuclear chromosome; P:immune system process; C:extracellular space; C:nucleolus; C:mitochondrion; C:peroxisome; C:endoplasmic reticulum; C:cytosol; C:cytoskeleton; P:carbohydrate metabolic process; P:carbohydrate metabolic process; P:protein folding; P:cellular protein modification process; P:cellular amino acid metabolic process; P:protein targeting; P:sulfur compound metabolic…	EC:1.11.1; EC:1.11.1.15; EC:1.11.1.9; EC:1.11.1.7	Acting on a peroxide as acceptor; Peroxiredoxin; Glutathione peroxidase; Peroxidase	IPR019479 (PFAM); IPR000866 (PFAM); G3DSA:3.40.30.10 (GENE3D); mobidb-lite (MOBIDB_LITE); PTHR10681:SF127 (PANTHER); PTHR10681 (PANTHER); IPR013766 (PROSITE_PROFILES); cd03015 (CDD); IPR036249 (SUPERFAMILY)	F:GO:0016209; F:GO:0016491; P:GO:0045454; F:GO:0051920; P:GO:0055114	F:antioxidant activity; F:oxidoreductase activity; P:cell redox homeostasis; F:peroxiredoxin activity; P:oxidation-reduction process
TRUE	[INTERPRO, BLASTED, GO-SLIM]	DERPT_G7501	: Full=Protocatechuate 3,4-dioxygenase beta chain ame: Full=3,4-PCD	248	3	3.32572e-06	43.67	2	F:GO:0016491; F:GO:0043167	F:oxidoreductase activity; F:ion binding	EC:1.13.11	Acting on single donors with incorporation of molecular oxygen (oxygenases). The oxygen incorporated need not be derived from O(2)	IPR000627 (PFAM); IPR015889 (G3DSA:2.60.130.GENE3D); PTHR34315 (PANTHER); SIGNAL_PEPTIDE_H_REGION (PHOBIUS); NON_CYTOPLASMIC_DOMAIN (PHOBIUS); SIGNAL_PEPTIDE (PHOBIUS); SIGNAL_PEPTIDE_N_REGION (PHOBIUS); SIGNAL_PEPTIDE_C_REGION (PHOBIUS); cd03457 (CDD); SignalP-noTM (SIGNALP_EUK); IPR015889 (SUPERFAMILY)	F:GO:0003824; F:GO:0005506; P:GO:0006725; F:GO:0008199; F:GO:0016702; P:GO:0055114	F:catalytic activity; F:iron ion binding; P:cellular aromatic compound metabolic process; F:ferric iron binding; F:oxidoreductase activity, acting on single donors with incorporation of molecular oxygen, incorporation of two atoms of oxygen; P:oxidation-reduction process
TRUE	[INTERPRO, BLASTED, MAPPED, GO-SLIM]	DERPT_G11432	: Full=Tryptophan 2,3-dioxygenase Short=TDO ame: Full= vermilion ame: Full=Tryptamin 2,3-dioxygenase ame: Full=Tryptophan oxygenase Short=TO Short=TRPO ame: Full=Tryptophan pyrrolase ame: Full=Tryptophanase	1852	20	2.65867e-144	72.37	14	C:GO:0005576; P:GO:0006520; P:GO:0006790; P:GO:0008219; P:GO:0009056; P:GO:0009056; P:GO:0009058; P:GO:0009058; F:GO:0016491; P:GO:0019748; P:GO:0034641; F:GO:0043167; P:GO:0043473; P:GO:0051186	C:extracellular region; P:cellular amino acid metabolic process; P:sulfur compound metabolic process; P:cell death; P:catabolic process; P:catabolic process; P:biosynthetic process; P:biosynthetic process; F:oxidoreductase activity; P:secondary metabolic process; P:cellular nitrogen compound metabolic process; F:ion binding; P:pigmentation; P:cofactor metabolic process	EC:1.13.11; EC:1.13.11.11	Acting on single donors with incorporation of molecular oxygen (oxygenases). The oxygen incorporated need not be derived from O(2); Tryptophan 2,3-dioxygenase	Coil (COILS); IPR002557 (SMART); IPR002110 (SMART); IPR020683 (PFAM); G3DSA:1.25.40.960 (GENE3D); IPR002557 (PFAM); IPR036770 (G3DSA:1.25.40.GENE3D); IPR004981 (PFAM); IPR036770 (G3DSA:1.25.40.GENE3D); mobidb-lite (MOBIDB_LITE); mobidb-lite (MOBIDB_LITE); mobidb-lite (MOBIDB_LITE); mobidb-lite (MOBIDB_LITE); mobidb-lite (MOBIDB_LITE); mobidb-lite (MOBIDB_LITE); mobidb-lite (MOBIDB_LITE); IPR00498…	F:GO:0004833; F:GO:0005515; C:GO:0005576; P:GO:0006030; F:GO:0008061; P:GO:0019441; F:GO:0020037; F:GO:0046872	F:tryptophan 2,3-dioxygenase activity; F:protein binding; C:extracellular region; P:chitin metabolic process; F:chitin binding; P:tryptophan catabolic process to kynurenine; F:heme binding; F:metal ion binding
TRUE	[INTERPRO, BLASTED, MAPPED, GO-SLIM]	DERPT_G7725	: Full=4-hydroxyphenylpyruvate dioxygenase ame: Full=4-hydroxyphenylpyruvic acid oxidase Short=4HPPD Short=HPD Short=HPPDase	2165	20	0	71.31	23	P:GO:0000003; P:GO:0000278; F:GO:0003677; C:GO:0005576; C:GO:0005634; C:GO:0005654; C:GO:0005739; C:GO:0005783; C:GO:0005794; C:GO:0005829; P:GO:0006259; P:GO:0006520; P:GO:0006950; P:GO:0007005; P:GO:0007059; P:GO:0009056; P:GO:0009056; F:GO:0016491; F:GO:0016853; P:GO:0040007; F:GO:0043167; P:GO:0048856; P:GO:0051276	P:reproduction; P:mitotic cell cycle; F:DNA binding; C:extracellular region; C:nucleus; C:nucleoplasm; C:mitochondrion; C:endoplasmic reticulum; C:Golgi apparatus; C:cytosol; P:DNA metabolic process; P:cellular amino acid metabolic process; P:response to stress; P:mitochondrion organization; P:chromosome segregation; P:catabolic process; P:catabolic process; F:oxidoreductase activity; F:isomerase…	EC:1.13.11; EC:1.13.11.24; EC:5.99.1; EC:1.13.11.27; EC:5.99.1.2	Acting on single donors with incorporation of molecular oxygen (oxygenases). The oxygen incorporated need not be derived from O(2); Quercetin 2,3-dioxygenase; Other isomerases; 4-hydroxyphenylpyruvate dioxygenase; DNA topoisomerase	Coil (COILS); Coil (COILS); IPR013497 (PRINTS); IPR006171 (SMART); IPR003602 (SMART); IPR003601 (SMART); IPR013824 (G3DSA:1.10.460.GENE3D); IPR005956 (TIGRFAM); IPR013825 (G3DSA:2.70.20.GENE3D); G3DSA:3.40.50.140 (GENE3D); IPR029068 (G3DSA:3.10.180.GENE3D); IPR004360 (PFAM); IPR013826 (G3DSA:1.10.290.GENE3D); IPR006171 (PFAM); IPR029068 (G3DSA:3.10.180.GENE3D); IPR013497 (PFAM); mobidb-lite (MOBI…	F:GO:0003677; F:GO:0003868; F:GO:0003916; P:GO:0006265; P:GO:0009072; F:GO:0016701; P:GO:0055114	F:DNA binding; F:4-hydroxyphenylpyruvate dioxygenase activity; F:DNA topoisomerase activity; P:DNA topological change; P:aromatic amino acid family metabolic process; F:oxidoreductase activity, acting on single donors with incorporation of molecular oxygen; P:oxidation-reduction process
TRUE	[INTERPRO, BLASTED, MAPPED, GO-SLIM]	DERPT_G6139	: Full=4-hydroxyphenylpyruvate dioxygenase ame: Full=4-hydroxyphenylpyruvic acid oxidase Short=4HPPD Short=HPD Short=HPPDase	374	20	7.97955e-114	61.85	9	C:GO:0005783; C:GO:0005794; P:GO:0006520; P:GO:0009056; P:GO:0009056; P:GO:0009058; P:GO:0009058; F:GO:0016491; P:GO:0019748	C:endoplasmic reticulum; C:Golgi apparatus; P:cellular amino acid metabolic process; P:catabolic process; P:catabolic process; P:biosynthetic process; P:biosynthetic process; F:oxidoreductase activity; P:secondary metabolic process	EC:1.13.11; EC:1.13.11.27	Acting on single donors with incorporation of molecular oxygen (oxygenases). The oxygen incorporated need not be derived from O(2); 4-hydroxyphenylpyruvate dioxygenase	Coil (COILS); IPR005956 (TIGRFAM); IPR029068 (G3DSA:3.10.180.GENE3D); IPR005956 (PIRSF); IPR004360 (PFAM); IPR029068 (G3DSA:3.10.180.GENE3D); PTHR11959:SF1 (PANTHER); IPR005956 (PANTHER); SIGNAL_PEPTIDE (PHOBIUS); SIGNAL_PEPTIDE_C_REGION (PHOBIUS); SIGNAL_PEPTIDE_H_REGION (PHOBIUS); NON_CYTOPLASMIC_DOMAIN (PHOBIUS); SIGNAL_PEPTIDE_N_REGION (PHOBIUS); IPR037523 (PROSITE_PROFILES); IPR037523 (PROSI…	F:GO:0003868; P:GO:0009072; F:GO:0016701; P:GO:0055114	F:4-hydroxyphenylpyruvate dioxygenase activity; P:aromatic amino acid family metabolic process; F:oxidoreductase activity, acting on single donors with incorporation of molecular oxygen; P:oxidation-reduction process
TRUE	[INTERPRO, BLASTED, MAPPED, GO-SLIM]	DERPT_G8448	: Full=Homogentisate 1,2-dioxygenase Short=HGDO ame: Full=Homogentisate oxygenase ame: Full=Homogentisic acid oxidase ame: Full=Homogentisicase	437	20	0	72.63	8	C:GO:0005576; C:GO:0005829; P:GO:0006520; P:GO:0009056; P:GO:0009056; F:GO:0016491; F:GO:0043167; C:GO:0043226	C:extracellular region; C:cytosol; P:cellular amino acid metabolic process; P:catabolic process; P:catabolic process; F:oxidoreductase activity; F:ion binding; C:organelle	EC:1.13.11; EC:1.13.11.5	Acting on single donors with incorporation of molecular oxygen (oxygenases). The oxygen incorporated need not be derived from O(2); Homogentisate 1,2-dioxygenase	IPR014710 (G3DSA:2.60.120.GENE3D); IPR005708 (PFAM); IPR005708 (TIGRFAM); PTHR11056:SF0 (PANTHER); IPR005708 (PANTHER); IPR011051 (SUPERFAMILY)	F:GO:0004411; P:GO:0006559; P:GO:0006570; P:GO:0055114	F:homogentisate 1,2-dioxygenase activity; P:L-phenylalanine catabolic process; P:tyrosine metabolic process; P:oxidation-reduction process
TRUE	[INTERPRO, BLASTED, MAPPED, GO-SLIM]	DERPT_G7429	: Full=1,2-dihydroxy-3-keto-5-methylthiopentene dioxygenase ame: Full=Acireductone dioxygenase (Fe(2+)-requiring) Short=ARD Short=Fe-ARD	181	20	2.20293e-79	73.49	10	C:GO:0005634; C:GO:0005829; C:GO:0005886; P:GO:0006520; P:GO:0006790; P:GO:0009058; P:GO:0009058; F:GO:0016491; F:GO:0043167; P:GO:0051301	C:nucleus; C:cytosol; C:plasma membrane; P:cellular amino acid metabolic process; P:sulfur compound metabolic process; P:biosynthetic process; P:biosynthetic process; F:oxidoreductase activity; F:ion binding; P:cell division	EC:1.13.11; EC:1.13.11.54	Acting on single donors with incorporation of molecular oxygen (oxygenases). The oxygen incorporated need not be derived from O(2); Acireductone dioxygenase (Fe(2+)-requiring)	IPR014710 (G3DSA:2.60.120.GENE3D); IPR004313 (PFAM); mobidb-lite (MOBIDB_LITE); PTHR23418:SF4 (PANTHER); IPR004313 (PANTHER); IPR027496 (HAMAP); IPR011051 (SUPERFAMILY)	F:GO:0010309; F:GO:0016491; P:GO:0019509; P:GO:0055114	F:acireductone dioxygenase [iron(II)-requiring] activity; F:oxidoreductase activity; P:L-methionine salvage from methylthioadenosine; P:oxidation-reduction process
TRUE	[INTERPRO, BLASTED, MAPPED, GO-SLIM]	DERPT_G1629	: Full=3-hydroxyanthranilate 3,4-dioxygenase ame: Full=3-hydroxyanthranilate oxygenase Short=3-HAO ame: Full=3-hydroxyanthranilic acid dioxygenase Short=HAD	299	20	8.72202e-82	61.2	9	C:GO:0005737; P:GO:0006520; P:GO:0009058; P:GO:0009058; F:GO:0016491; P:GO:0034641; F:GO:0043167; C:GO:0043226; P:GO:0051186	C:cytoplasm; P:cellular amino acid metabolic process; P:biosynthetic process; P:biosynthetic process; F:oxidoreductase activity; P:cellular nitrogen compound metabolic process; F:ion binding; C:organelle; P:cofactor metabolic process	EC:1.13.11; EC:1.13.11.6	Acting on single donors with incorporation of molecular oxygen (oxygenases). The oxygen incorporated need not be derived from O(2); 3-hydroxyanthranilate 3,4-dioxygenase	IPR010329 (PFAM); IPR014710 (G3DSA:2.60.120.GENE3D); IPR010329 (PANTHER); PTHR15497:SF1 (PANTHER); IPR010329 (HAMAP); IPR011051 (SUPERFAMILY)	F:GO:0000334; F:GO:0005506; P:GO:0055114	F:3-hydroxyanthranilate 3,4-dioxygenase activity; F:iron ion binding; P:oxidation-reduction process
TRUE	[INTERPRO, BLASTED, MAPPED, GO-SLIM]	DERPT_G3117	: Full=Prolyl 4-hydroxylase subunit alpha-1 Short=4-PH alpha-1 ame: Full=Procollagen-proline,2-oxoglutarate-4-dioxygenase subunit alpha-1 Flags: Precursor	559	20	3.68288e-97	49.79	7	C:GO:0005783; C:GO:0005794; P:GO:0006464; P:GO:0006520; P:GO:0009790; F:GO:0016491; F:GO:0043167	C:endoplasmic reticulum; C:Golgi apparatus; P:cellular protein modification process; P:cellular amino acid metabolic process; P:embryo development; F:oxidoreductase activity; F:ion binding	EC:1.13.11; EC:1.14.11; EC:1.14.11.2	Acting on single donors with incorporation of molecular oxygen (oxygenases). The oxygen incorporated need not be derived from O(2); Acting on paired donors, with incorporation or reduction of molecular oxygen. The oxygen incorporated need not be derived from O(2); Procollagen-proline 4-dioxygenase	Coil (COILS); IPR006620 (SMART); IPR005123 (PFAM); IPR011990 (G3DSA:1.25.40.GENE3D); G3DSA:2.60.120.620 (GENE3D); IPR013547 (PFAM); PTHR10869 (PANTHER); PTHR10869 (PANTHER); PTHR10869:SF90 (PANTHER); IPR005123 (PROSITE_PROFILES)	F:GO:0004656; F:GO:0005506; F:GO:0005515; C:GO:0005783; F:GO:0016491; F:GO:0016702; F:GO:0016705; F:GO:0031418; P:GO:0055114	F:procollagen-proline 4-dioxygenase activity; F:iron ion binding; F:protein binding; C:endoplasmic reticulum; F:oxidoreductase activity; F:oxidoreductase activity, acting on single donors with incorporation of molecular oxygen, incorporation of two atoms of oxygen; F:oxidoreductase activity, acting on paired donors, with incorporation or reduction of molecular oxygen; F:L-ascorbic acid binding; P…
TRUE	[INTERPRO, BLASTED, MAPPED, GO-SLIM]	DERPT_G10243	: Full=Retinoid isomerohydrolase ame: Full=All-trans-retinyl-palmitate hydrolase ame: Full=Meso-zeaxanthin isomerase ame: Full=Retinal pigment epithelium-specific 65 kDa ame: Full=Retinol isomerase	712	20	7.7306e-108	55.38	13	C:GO:0005739; C:GO:0005829; P:GO:0006629; P:GO:0009056; P:GO:0009056; P:GO:0009058; F:GO:0016491; F:GO:0016746; F:GO:0016853; F:GO:0043167; P:GO:0044281; P:GO:0048856; P:GO:0050877	C:mitochondrion; C:cytosol; P:lipid metabolic process; P:catabolic process; P:catabolic process; P:biosynthetic process; F:oxidoreductase activity; F:transferase activity, transferring acyl groups; F:isomerase activity; F:ion binding; P:small molecule metabolic process; P:anatomical structure development; P:nervous system process	EC:1.13.11; EC:3.1.1.64; EC:1.14.99.36; EC:3.1.1.1	Acting on single donors with incorporation of molecular oxygen (oxygenases). The oxygen incorporated need not be derived from O(2); Retinoid isomerohydrolase; Acting on paired donors, with incorporation or reduction of molecular oxygen. The oxygen incorporated need not be derived from O(2); Carboxylesterase	G3DSA:3.40.630.30 (GENE3D); IPR000182 (PFAM); IPR004294 (PFAM); PTHR10543:SF24 (PANTHER); IPR004294 (PANTHER); IPR000182 (PROSITE_PROFILES); cd04301 (CDD); IPR016181 (SUPERFAMILY)	F:GO:0016702; P:GO:0055114	F:oxidoreductase activity, acting on single donors with incorporation of molecular oxygen, incorporation of two atoms of oxygen; P:oxidation-reduction process
TRUE	[INTERPRO, BLASTED, MAPPED, GO-SLIM]	DERPT_G3003	: Full=Hydroxyacylglutathione hydrolase ame: Full=Glyoxalase II Short=Glx II	236	20	1.09602e-89	53.89	13	P:GO:0000003; C:GO:0005654; C:GO:0005739; C:GO:0005829; P:GO:0006790; P:GO:0006950; P:GO:0009056; P:GO:0009056; P:GO:0009790; F:GO:0016491; P:GO:0034641; F:GO:0043167; P:GO:0044281	P:reproduction; C:nucleoplasm; C:mitochondrion; C:cytosol; P:sulfur compound metabolic process; P:response to stress; P:catabolic process; P:catabolic process; P:embryo development; F:oxidoreductase activity; P:cellular nitrogen compound metabolic process; F:ion binding; P:small molecule metabolic process	EC:1.13.11; EC:3.1.2.7; EC:3.1.2.6; EC:1.13.11.18	Acting on single donors with incorporation of molecular oxygen (oxygenases). The oxygen incorporated need not be derived from O(2); Glutathione thiolesterase; Hydroxyacylglutathione hydrolase; Persulfide dioxygenase	IPR001279 (SMART); IPR001279 (PFAM); IPR036866 (G3DSA:3.60.15.GENE3D); PTHR43084:SF1 (PANTHER); PTHR43084 (PANTHER); cd07724 (CDD); IPR036866 (SUPERFAMILY)	no GO terms	no GO terms
TRUE	[INTERPRO, BLASTED, MAPPED, GO-SLIM]	DERPT_G10310	: Full=Inositol oxygenase ame: Full=Myo-inositol oxygenase Short=MI oxygenase	767	13	1.81284e-122	71.62	14	C:GO:0005576; C:GO:0005737; P:GO:0005975; P:GO:0005975; P:GO:0009056; P:GO:0009056; P:GO:0009058; P:GO:0009058; F:GO:0016491; F:GO:0043167; C:GO:0043226; P:GO:0044281; P:GO:0048646; P:GO:0048856	C:extracellular region; C:cytoplasm; P:carbohydrate metabolic process; P:carbohydrate metabolic process; P:catabolic process; P:catabolic process; P:biosynthetic process; P:biosynthetic process; F:oxidoreductase activity; F:ion binding; C:organelle; P:small molecule metabolic process; P:anatomical structure formation involved in morphogenesis; P:anatomical structure development	EC:1.13.99.1	Inositol oxygenase	IPR007828 (PFAM); mobidb-lite (MOBIDB_LITE); mobidb-lite (MOBIDB_LITE); SSF109604 (SUPERFAMILY)	F:GO:0005506; C:GO:0005737; P:GO:0019310; F:GO:0050113; P:GO:0055114	F:iron ion binding; C:cytoplasm; P:inositol catabolic process; F:inositol oxygenase activity; P:oxidation-reduction process
TRUE	[INTERPRO, BLASTED, MAPPED, GO-SLIM]	DERPT_G8916	: Full=Prolyl 3-hydroxylase OGFOD1 ame: Full=2-oxoglutarate and iron-dependent oxygenase domain-containing 1 ame: Full=uS12 prolyl 3-hydroxylase	718	9	3.97545e-49	47.26	6	C:GO:0005737; P:GO:0006412; P:GO:0006464; F:GO:0016491; F:GO:0043167; C:GO:0043226	C:cytoplasm; P:translation; P:cellular protein modification process; F:oxidoreductase activity; F:ion binding; C:organelle	EC:1.14.11	Acting on paired donors, with incorporation or reduction of molecular oxygen. The oxygen incorporated need not be derived from O(2)	IPR006620 (SMART); G3DSA:2.60.120.620 (GENE3D); IPR019601 (PFAM); PF13661 (PFAM); G3DSA:2.60.120.620 (GENE3D); mobidb-lite (MOBIDB_LITE); mobidb-lite (MOBIDB_LITE); mobidb-lite (MOBIDB_LITE); PTHR12117 (PANTHER); IPR005123 (PROSITE_PROFILES)	F:GO:0005506; F:GO:0016491; F:GO:0016705; F:GO:0016706; F:GO:0031418; P:GO:0055114	F:iron ion binding; F:oxidoreductase activity; F:oxidoreductase activity, acting on paired donors, with incorporation or reduction of molecular oxygen; F:oxidoreductase activity, acting on paired donors, with incorporation or reduction of molecular oxygen, 2-oxoglutarate as one donor, and incorporation of one atom each of oxygen into both donors; F:L-ascorbic acid binding; P:oxidation-reduction p…
TRUE	[INTERPRO, BLASTED, MAPPED, GO-SLIM]	DERPT_G7633	: Full=TBC1 domain family member 22A	997	20	8.57612e-127	61.18	22	P:GO:0000003; C:GO:0005634; C:GO:0005739; C:GO:0005794; C:GO:0005829; P:GO:0006464; P:GO:0006520; P:GO:0006950; P:GO:0007165; P:GO:0008219; P:GO:0008283; P:GO:0009058; P:GO:0009790; P:GO:0016192; F:GO:0016491; F:GO:0019899; P:GO:0022607; F:GO:0030234; P:GO:0034655; P:GO:0042592; F:GO:0043167; P:GO:0048646	P:reproduction; C:nucleus; C:mitochondrion; C:Golgi apparatus; C:cytosol; P:cellular protein modification process; P:cellular amino acid metabolic process; P:response to stress; P:signal transduction; P:cell death; P:cell proliferation; P:biosynthetic process; P:embryo development; P:vesicle-mediated transport; F:oxidoreductase activity; F:enzyme binding; P:cellular component assembly; F:enzyme r…	EC:1.14.11	Acting on paired donors, with incorporation or reduction of molecular oxygen. The oxygen incorporated need not be derived from O(2)	IPR006620 (SMART); IPR000195 (SMART); G3DSA:3.30.60.180 (GENE3D); G3DSA:2.60.120.620 (GENE3D); G3DSA:1.10.8.270 (GENE3D); IPR005123 (PFAM); IPR002893 (PFAM); IPR000195 (PFAM); mobidb-lite (MOBIDB_LITE); mobidb-lite (MOBIDB_LITE); mobidb-lite (MOBIDB_LITE); PTHR22957:SF255 (PANTHER); PTHR22957:SF255 (PANTHER); PTHR22957:SF255 (PANTHER); PTHR22957 (PANTHER); PTHR22957 (PANTHER); IPR002893 (PROSITE_…	F:GO:0005506; F:GO:0016491; F:GO:0016705; F:GO:0031418; P:GO:0055114	F:iron ion binding; F:oxidoreductase activity; F:oxidoreductase activity, acting on paired donors, with incorporation or reduction of molecular oxygen; F:L-ascorbic acid binding; P:oxidation-reduction process
TRUE	[INTERPRO, BLASTED, MAPPED, GO-SLIM]	DERPT_G7588	: Full=tRNA wybutosine-synthesizing 4 Short=tRNA-yW synthesizing 4 ame: Full=Leucine carboxyl methyltransferase 2 ame: Full=tRNA(Phe) (7-(3-amino-3-(methoxycarbonyl)propyl)wyosine(37)-N)-methoxycarbonyltransferase ame: Full=tRNA(Phe) (7-(3-amino-3-carboxypropyl)wyosine(37)-O)-methyltransferase	1225	20	9.01291e-73	51.9	13	F:GO:0003723; C:GO:0005634; C:GO:0005737; P:GO:0006399; P:GO:0006464; P:GO:0006950; P:GO:0007165; P:GO:0009058; P:GO:0009058; F:GO:0016491; P:GO:0030154; F:GO:0043167; P:GO:0048856	F:RNA binding; C:nucleus; C:cytoplasm; P:tRNA metabolic process; P:cellular protein modification process; P:response to stress; P:signal transduction; P:biosynthetic process; P:biosynthetic process; F:oxidoreductase activity; P:cell differentiation; F:ion binding; P:anatomical structure development	EC:1.14.11	Acting on paired donors, with incorporation or reduction of molecular oxygen. The oxygen incorporated need not be derived from O(2)	IPR029444 (PFAM); IPR029445 (PFAM); G3DSA:2.60.120.650 (GENE3D); PF13621 (PFAM); IPR029612 (PTHR12461:PANTHER); PTHR12461 (PANTHER); IPR003347 (PROSITE_PROFILES); SSF51197 (SUPERFAMILY)	F:GO:0000049; F:GO:0016706; P:GO:0031591	F:tRNA binding; F:oxidoreductase activity, acting on paired donors, with incorporation or reduction of molecular oxygen, 2-oxoglutarate as one donor, and incorporation of one atom each of oxygen into both donors; P:wybutosine biosynthetic process
TRUE	[INTERPRO, BLASTED, MAPPED, GO-SLIM]	DERPT_G7188	: Full=Lysine-specific demethylase 7A ame: Full= domain-containing histone demethylation 1D ame: Full=Lysine-specific demethylase 7	734	20	2.21471e-81	51.46	13	F:GO:0003677; C:GO:0005634; C:GO:0005694; P:GO:0006464; P:GO:0008219; P:GO:0009058; P:GO:0009790; F:GO:0016491; C:GO:0032991; P:GO:0034641; F:GO:0042393; F:GO:0043167; P:GO:0051276	F:DNA binding; C:nucleus; C:chromosome; P:cellular protein modification process; P:cell death; P:biosynthetic process; P:embryo development; F:oxidoreductase activity; C:protein-containing complex; P:cellular nitrogen compound metabolic process; F:histone binding; F:ion binding; P:chromosome organization	EC:1.14.11	Acting on paired donors, with incorporation or reduction of molecular oxygen. The oxygen incorporated need not be derived from O(2)	IPR001965 (SMART); IPR003347 (SMART); G3DSA:2.60.120.650 (GENE3D); IPR003347 (PFAM); IPR013083 (G3DSA:3.30.40.GENE3D); G3DSA:1.20.58.1360 (GENE3D); mobidb-lite (MOBIDB_LITE); mobidb-lite (MOBIDB_LITE); mobidb-lite (MOBIDB_LITE); PTHR23123 (PANTHER); PTHR23123:SF15 (PANTHER); PTHR23123 (PANTHER); IPR003347 (PROSITE_PROFILES); SSF51197 (SUPERFAMILY); IPR011011 (SUPERFAMILY)	no GO terms	no GO terms
TRUE	[INTERPRO, BLASTED, MAPPED, GO-SLIM]	DERPT_G11169	: Full=Lysine-specific demethylase 4A ame: Full= domain-containing histone demethylation 3A ame: Full=Jumonji domain-containing 2A	964	20	4.89206e-169	66.93	24	C:GO:0000228; F:GO:0003677; F:GO:0003700; F:GO:0003700; C:GO:0005615; C:GO:0005654; C:GO:0005730; C:GO:0005737; P:GO:0006259; P:GO:0006464; P:GO:0006914; P:GO:0006950; P:GO:0007165; P:GO:0008219; P:GO:0008283; P:GO:0009058; P:GO:0009790; F:GO:0016491; F:GO:0019899; P:GO:0030154; F:GO:0042393; F:GO:0043167; P:GO:0048646; P:GO:0051276	C:nuclear chromosome; F:DNA binding; F:DNA-binding transcription factor activity; F:DNA-binding transcription factor activity; C:extracellular space; C:nucleoplasm; C:nucleolus; C:cytoplasm; P:DNA metabolic process; P:cellular protein modification process; P:autophagy; P:response to stress; P:signal transduction; P:cell death; P:cell proliferation; P:biosynthetic process; P:embryo development; F:…	EC:1.14.11.27; EC:1.14.11	[Histone H3]-lysine-36 demethylase; Acting on paired donors, with incorporation or reduction of molecular oxygen. The oxygen incorporated need not be derived from O(2)	IPR001965 (SMART); IPR003349 (SMART); IPR003347 (SMART); PF13832 (PFAM); IPR013083 (G3DSA:3.30.40.GENE3D); IPR003347 (PFAM); G3DSA:2.30.30.140 (GENE3D); G3DSA:2.60.120.650 (GENE3D); G3DSA:3.10.330.70 (GENE3D); IPR013083 (G3DSA:3.30.40.GENE3D); PF13831 (PFAM); IPR003349 (PFAM); mobidb-lite (MOBIDB_LITE); PTHR10694 (PANTHER); PTHR10694:SF30 (PANTHER); IPR019786 (PROSITE_PATTERNS); IPR034732 (PROSIT…	no GO terms	no GO terms
TRUE	[INTERPRO, BLASTED, MAPPED, GO-SLIM]	DERPT_G10677	: Full=Lysine-specific demethylase 7A ame: Full= domain-containing histone demethylation 1D ame: Full=Lysine-specific demethylase 7	2278	20	2.25213e-135	63.05	22	P:GO:0000003; C:GO:0000228; F:GO:0003677; F:GO:0003723; C:GO:0005654; C:GO:0005730; P:GO:0006464; P:GO:0008219; P:GO:0008283; P:GO:0009056; P:GO:0009058; P:GO:0009790; F:GO:0016491; P:GO:0030154; C:GO:0032991; P:GO:0034641; P:GO:0040007; F:GO:0042393; F:GO:0043167; P:GO:0048646; P:GO:0050877; P:GO:0051276	P:reproduction; C:nuclear chromosome; F:DNA binding; F:RNA binding; C:nucleoplasm; C:nucleolus; P:cellular protein modification process; P:cell death; P:cell proliferation; P:catabolic process; P:biosynthetic process; P:embryo development; F:oxidoreductase activity; P:cell differentiation; C:protein-containing complex; P:cellular nitrogen compound metabolic process; P:growth; F:histone binding; F…	EC:1.14.11.27; EC:1.14.11	[Histone H3]-lysine-36 demethylase; Acting on paired donors, with incorporation or reduction of molecular oxygen. The oxygen incorporated need not be derived from O(2)	Coil (COILS); Coil (COILS); Coil (COILS); IPR001965 (SMART); IPR003347 (SMART); IPR006553 (SMART); IPR013083 (G3DSA:3.30.40.GENE3D); IPR032675 (G3DSA:3.80.10.GENE3D); IPR019787 (PFAM); IPR001810 (PFAM); G3DSA:2.60.120.650 (GENE3D); G3DSA:1.20.58.2210 (GENE3D); IPR002857 (PFAM); G3DSA:1.20.58.1360 (GENE3D); mobidb-lite (MOBIDB_LITE); mobidb-lite (MOBIDB_LITE); mobidb-lite (MOBIDB_LITE); mobidb-lit…	F:GO:0003677; F:GO:0005515; F:GO:0008270	F:DNA binding; F:protein binding; F:zinc ion binding
TRUE	[INTERPRO, BLASTED, MAPPED, GO-SLIM]	DERPT_G3677	: Full=Phytanoyl- dioxygenase domain-containing 1	354	19	4.69344e-111	49.56	8	C:GO:0005739; C:GO:0005777; P:GO:0006629; P:GO:0009056; P:GO:0009056; F:GO:0016491; F:GO:0043167; P:GO:0044281	C:mitochondrion; C:peroxisome; P:lipid metabolic process; P:catabolic process; P:catabolic process; F:oxidoreductase activity; F:ion binding; P:small molecule metabolic process	EC:1.14.11; EC:1.14.11.18	Acting on paired donors, with incorporation or reduction of molecular oxygen. The oxygen incorporated need not be derived from O(2); Phytanoyl-CoA dioxygenase	IPR008775 (PFAM); G3DSA:2.60.120.620 (GENE3D); PTHR21308 (PANTHER); SSF51197 (SUPERFAMILY)	no GO terms	no GO terms
TRUE	[INTERPRO, BLASTED, MAPPED, GO-SLIM]	DERPT_G7482	: Full=Procollagen-lysine,2-oxoglutarate 5-dioxygenase 1 ame: Full=Lysyl hydroxylase 1 Short=LH1 Flags: Precursor	453	20	1.95214e-111	57.42	16	P:GO:0000902; P:GO:0003013; C:GO:0005783; P:GO:0006464; P:GO:0006520; P:GO:0009056; P:GO:0009056; P:GO:0009058; P:GO:0009058; P:GO:0009790; F:GO:0016491; F:GO:0016757; P:GO:0022607; P:GO:0030154; P:GO:0030198; F:GO:0043167	P:cell morphogenesis; P:circulatory system process; C:endoplasmic reticulum; P:cellular protein modification process; P:cellular amino acid metabolic process; P:catabolic process; P:catabolic process; P:biosynthetic process; P:biosynthetic process; P:embryo development; F:oxidoreductase activity; F:transferase activity, transferring glycosyl groups; P:cellular component assembly; P:cell different…	EC:1.14.11; EC:1.14.11.4; EC:2.4.1.66	Acting on paired donors, with incorporation or reduction of molecular oxygen. The oxygen incorporated need not be derived from O(2); Procollagen-lysine 5-dioxygenase; Procollagen glucosyltransferase	PTHR10730 (PANTHER); PTHR10730:SF26 (PANTHER); SIGNAL_PEPTIDE_H_REGION (PHOBIUS); SIGNAL_PEPTIDE (PHOBIUS); SIGNAL_PEPTIDE_N_REGION (PHOBIUS); SIGNAL_PEPTIDE_C_REGION (PHOBIUS); NON_CYTOPLASMIC_DOMAIN (PHOBIUS); SignalP-noTM (SIGNALP_EUK)	no GO terms	no GO terms
TRUE	[INTERPRO, BLASTED, MAPPED, GO-SLIM]	DERPT_G7480	: Full=Procollagen-lysine,2-oxoglutarate 5-dioxygenase 1 ame: Full=Lysyl hydroxylase 1 Short=LH1 Flags: Precursor	334	16	8.18821e-110	64.1	16	P:GO:0000902; P:GO:0003013; P:GO:0006464; P:GO:0006520; P:GO:0009056; P:GO:0009056; P:GO:0009058; P:GO:0009058; P:GO:0009790; F:GO:0016491; F:GO:0016757; P:GO:0022607; P:GO:0030154; P:GO:0030198; F:GO:0043167; C:GO:0043226	P:cell morphogenesis; P:circulatory system process; P:cellular protein modification process; P:cellular amino acid metabolic process; P:catabolic process; P:catabolic process; P:biosynthetic process; P:biosynthetic process; P:embryo development; F:oxidoreductase activity; F:transferase activity, transferring glycosyl groups; P:cellular component assembly; P:cell differentiation; P:extracellular m…	EC:1.14.11; EC:1.14.11.4; EC:2.4.1.66	Acting on paired donors, with incorporation or reduction of molecular oxygen. The oxygen incorporated need not be derived from O(2); Procollagen-lysine 5-dioxygenase; Procollagen glucosyltransferase	IPR006620 (SMART); G3DSA:2.60.120.620 (GENE3D); PTHR10730:SF26 (PANTHER); PTHR10730 (PANTHER); PTHR10730 (PANTHER); IPR005123 (PROSITE_PROFILES)	F:GO:0005506; F:GO:0016491; F:GO:0016705; F:GO:0031418; P:GO:0055114	F:iron ion binding; F:oxidoreductase activity; F:oxidoreductase activity, acting on paired donors, with incorporation or reduction of molecular oxygen; F:L-ascorbic acid binding; P:oxidation-reduction process
TRUE	[INTERPRO, BLASTED, MAPPED, GO-SLIM]	DERPT_G9544	: Full= disulfide-isomerase Short=PDI ame: Full=Cellular thyroid hormone-binding ame: Full=Prolyl 4-hydroxylase subunit beta ame: Full=p55 Flags: Precursor	1672	20	1.55992e-174	67.43	22	C:GO:0005615; C:GO:0005635; C:GO:0005739; C:GO:0005773; C:GO:0005783; C:GO:0005811; C:GO:0005886; P:GO:0006457; P:GO:0006464; P:GO:0006520; P:GO:0006950; P:GO:0007165; P:GO:0008219; C:GO:0009536; F:GO:0016491; F:GO:0016746; F:GO:0016853; F:GO:0019899; C:GO:0032991; P:GO:0042592; P:GO:0044403; P:GO:0048856	C:extracellular space; C:nuclear envelope; C:mitochondrion; C:vacuole; C:endoplasmic reticulum; C:lipid droplet; C:plasma membrane; P:protein folding; P:cellular protein modification process; P:cellular amino acid metabolic process; P:response to stress; P:signal transduction; P:cell death; C:plastid; F:oxidoreductase activity; F:transferase activity, transferring acyl groups; F:isomerase activit…	EC:1.14.11; EC:5.3.4.1; EC:1.14.11.2; EC:2.3.2.13	Acting on paired donors, with incorporation or reduction of molecular oxygen. The oxygen incorporated need not be derived from O(2); Protein disulfide-isomerase; Procollagen-proline 4-dioxygenase; Protein-glutamine gamma-glutamyltransferase	PR00421 (PRINTS); PF13771 (PFAM); IPR005792 (TIGRFAM); IPR005788 (TIGRFAM); IPR013083 (G3DSA:3.30.40.GENE3D); PF13848 (PFAM); G3DSA:3.40.30.10 (GENE3D); G3DSA:3.40.30.10 (GENE3D); G3DSA:3.40.30.10 (GENE3D); G3DSA:3.40.30.10 (GENE3D); IPR013766 (PFAM); mobidb-lite (MOBIDB_LITE); mobidb-lite (MOBIDB_LITE); mobidb-lite (MOBIDB_LITE); mobidb-lite (MOBIDB_LITE); mobidb-lite (MOBIDB_LITE); mobidb-lite …	C:GO:0005783; F:GO:0016853; P:GO:0045454	C:endoplasmic reticulum; F:isomerase activity; P:cell redox homeostasis
TRUE	[INTERPRO, BLASTED, MAPPED, GO-SLIM]	DERPT_G555	: Full=Ubiquinone biosynthesis monooxygenase mitochondrial ame: Full=Coenzyme Q10 monooxygenase 6 Flags: Precursor	1123	18	5.46084e-52	47.86	7	C:GO:0005739; P:GO:0009058; P:GO:0009058; F:GO:0016491; F:GO:0043167; P:GO:0044281; P:GO:0051186	C:mitochondrion; P:biosynthetic process; P:biosynthetic process; F:oxidoreductase activity; F:ion binding; P:small molecule metabolic process; P:cofactor metabolic process	EC:1.14.13	Acting on paired donors, with incorporation or reduction of molecular oxygen. The oxygen incorporated need not be derived from O(2)	PR00420 (PRINTS); IPR036188 (G3DSA:3.50.50.GENE3D); IPR035914 (G3DSA:2.60.120.GENE3D); IPR002938 (PFAM); IPR010971 (TIGRFAM); mobidb-lite (MOBIDB_LITE); mobidb-lite (MOBIDB_LITE); PTHR43876:SF7 (PANTHER); PTHR43876 (PANTHER); IPR018168 (PROSITE_PATTERNS); CYTOPLASMIC_DOMAIN (PHOBIUS); TRANSMEMBRANE (PHOBIUS); NON_CYTOPLASMIC_DOMAIN (PHOBIUS); NON_CYTOPLASMIC_DOMAIN (PHOBIUS); TRANSMEMBRANE (PHOBI…	P:GO:0006744; F:GO:0016709; F:GO:0050660; P:GO:0055114; F:GO:0071949	P:ubiquinone biosynthetic process; F:oxidoreductase activity, acting on paired donors, with incorporation or reduction of molecular oxygen, NAD(P)H as one donor, and incorporation of one atom of oxygen; F:flavin adenine dinucleotide binding; P:oxidation-reduction process; F:FAD binding
TRUE	[INTERPRO, BLASTED, MAPPED, GO-SLIM]	DERPT_G1214	: Full=Nitric oxide endothelial ame: Full=Constitutive NOS Short=cNOS ame: Full=EC-NOS ame: Full=Endothelial NOS Short=eNOS ame: Full=NOS type III Short=NOSIII	1512	20	0	60.35	33	P:GO:0000003; P:GO:0003013; F:GO:0003723; C:GO:0005615; C:GO:0005634; C:GO:0005739; C:GO:0005777; C:GO:0005783; C:GO:0005829; C:GO:0005856; C:GO:0005886; P:GO:0006412; P:GO:0006464; P:GO:0006520; P:GO:0006950; P:GO:0007049; P:GO:0007165; P:GO:0007568; F:GO:0008092; P:GO:0008219; P:GO:0008283; P:GO:0009056; P:GO:0009056; P:GO:0009790; F:GO:0016491; F:GO:0019899; P:GO:0030154; F:GO:0030234; C:GO:00…	P:reproduction; P:circulatory system process; F:RNA binding; C:extracellular space; C:nucleus; C:mitochondrion; C:peroxisome; C:endoplasmic reticulum; C:cytosol; C:cytoskeleton; C:plasma membrane; P:translation; P:cellular protein modification process; P:cellular amino acid metabolic process; P:response to stress; P:cell cycle; P:signal transduction; P:aging; F:cytoskeletal protein binding; P:cel…	EC:1.14.13.39; EC:1.14.13	Nitric-oxide synthase (NADPH); Acting on paired donors, with incorporation or reduction of molecular oxygen. The oxygen incorporated need not be derived from O(2)	IPR001709 (PRINTS); IPR001094 (PRINTS); IPR001478 (SMART); G3DSA:3.90.340.10 (GENE3D); G3DSA:3.40.50.80 (GENE3D); G3DSA:3.90.1230.10 (GENE3D); IPR008254 (PFAM); G3DSA:3.90.440.10 (GENE3D); IPR003097 (PFAM); IPR001433 (PFAM); IPR004030 (PFAM); IPR001478 (PFAM); IPR012144 (PIRSF); G3DSA:2.30.42.10 (GENE3D); G3DSA:2.40.30.10 (GENE3D); mobidb-lite (MOBIDB_LITE); mobidb-lite (MOBIDB_LITE); PTHR19384:S…	F:GO:0004517; F:GO:0005515; F:GO:0005516; P:GO:0006809; F:GO:0010181; F:GO:0016491; F:GO:0020037; F:GO:0050660; F:GO:0050661; P:GO:0055114	F:nitric-oxide synthase activity; F:protein binding; F:calmodulin binding; P:nitric oxide biosynthetic process; F:FMN binding; F:oxidoreductase activity; F:heme binding; F:flavin adenine dinucleotide binding; F:NADP binding; P:oxidation-reduction process
TRUE	[INTERPRO, BLASTED, MAPPED, GO-SLIM]	DERPT_G29	: Full=Dimethylaniline monooxygenase	545	20	1.17157e-157	59.4	5	C:GO:0005737; F:GO:0016491; F:GO:0043167; C:GO:0043226; P:GO:0044281	C:cytoplasm; F:oxidoreductase activity; F:ion binding; C:organelle; P:small molecule metabolic process	EC:1.14.13.8; EC:1.14.13	Flavin-containing monooxygenase; Acting on paired donors, with incorporation or reduction of molecular oxygen. The oxygen incorporated need not be derived from O(2)	IPR002257 (PRINTS); IPR000960 (PRINTS); IPR000960 (PIRSF); IPR036188 (G3DSA:3.50.50.GENE3D); IPR020946 (PFAM); IPR036188 (G3DSA:3.50.50.GENE3D); PTHR23023 (PANTHER); PTHR23023:SF166 (PANTHER); NON_CYTOPLASMIC_DOMAIN (PHOBIUS); TRANSMEMBRANE (PHOBIUS); SIGNAL_PEPTIDE_C_REGION (PHOBIUS); CYTOPLASMIC_DOMAIN (PHOBIUS); SIGNAL_PEPTIDE_H_REGION (PHOBIUS); SIGNAL_PEPTIDE_N_REGION (PHOBIUS); SIGNAL_PEPTI…	F:GO:0004499; F:GO:0050660; F:GO:0050661; P:GO:0055114	F:N,N-dimethylaniline monooxygenase activity; F:flavin adenine dinucleotide binding; F:NADP binding; P:oxidation-reduction process
TRUE	[INTERPRO, BLASTED, MAPPED, GO-SLIM]	DERPT_G11463	: Full=Dimethylaniline monooxygenase	547	20	6.32411e-172	62.21	6	C:GO:0005783; F:GO:0016491; P:GO:0034641; F:GO:0043167; P:GO:0044281; P:GO:0051186	C:endoplasmic reticulum; F:oxidoreductase activity; P:cellular nitrogen compound metabolic process; F:ion binding; P:small molecule metabolic process; P:cofactor metabolic process	EC:1.14.13.8; EC:1.14.13	Flavin-containing monooxygenase; Acting on paired donors, with incorporation or reduction of molecular oxygen. The oxygen incorporated need not be derived from O(2)	IPR000960 (PRINTS); IPR002257 (PRINTS); IPR020946 (PFAM); IPR036188 (G3DSA:3.50.50.GENE3D); IPR000960 (PIRSF); PTHR23023 (PANTHER); PTHR23023:SF166 (PANTHER); NON_CYTOPLASMIC_DOMAIN (PHOBIUS); SIGNAL_PEPTIDE_H_REGION (PHOBIUS); SIGNAL_PEPTIDE_C_REGION (PHOBIUS); SIGNAL_PEPTIDE (PHOBIUS); SIGNAL_PEPTIDE_N_REGION (PHOBIUS); CYTOPLASMIC_DOMAIN (PHOBIUS); TRANSMEMBRANE (PHOBIUS); IPR036188 (SUPERFAMI…	F:GO:0004499; F:GO:0050660; F:GO:0050661; P:GO:0055114	F:N,N-dimethylaniline monooxygenase activity; F:flavin adenine dinucleotide binding; F:NADP binding; P:oxidation-reduction process
TRUE	[INTERPRO, BLASTED, MAPPED, GO-SLIM]	DERPT_G10950	: Full=Dimethylaniline monooxygenase	505	20	1.97735e-53	47.5	6	C:GO:0005737; F:GO:0016491; P:GO:0019748; F:GO:0043167; C:GO:0043226; P:GO:0044281	C:cytoplasm; F:oxidoreductase activity; P:secondary metabolic process; F:ion binding; C:organelle; P:small molecule metabolic process	EC:1.14.13.8; EC:1.14.13	Flavin-containing monooxygenase; Acting on paired donors, with incorporation or reduction of molecular oxygen. The oxygen incorporated need not be derived from O(2)	Coil (COILS); IPR000960 (PRINTS); IPR000960 (PIRSF); IPR036188 (G3DSA:3.50.50.GENE3D); IPR020946 (PFAM); IPR036188 (G3DSA:3.50.50.GENE3D); mobidb-lite (MOBIDB_LITE); PTHR23023 (PANTHER); IPR036188 (SUPERFAMILY); IPR036188 (SUPERFAMILY); IPR036188 (SUPERFAMILY)	F:GO:0004499; F:GO:0050660; F:GO:0050661; P:GO:0055114	F:N,N-dimethylaniline monooxygenase activity; F:flavin adenine dinucleotide binding; F:NADP binding; P:oxidation-reduction process
TRUE	[INTERPRO, BLASTED, MAPPED, GO-SLIM]	DERPT_G6170	: Full=Cytochrome P450 2U1	984	20	6.08634e-139	55.03	14	P:GO:0000003; P:GO:0003013; C:GO:0005783; P:GO:0006629; P:GO:0009056; P:GO:0009056; P:GO:0009058; F:GO:0016491; P:GO:0019748; P:GO:0030154; F:GO:0043167; P:GO:0044281; P:GO:0048646; P:GO:0048856	P:reproduction; P:circulatory system process; C:endoplasmic reticulum; P:lipid metabolic process; P:catabolic process; P:catabolic process; P:biosynthetic process; F:oxidoreductase activity; P:secondary metabolic process; P:cell differentiation; F:ion binding; P:small molecule metabolic process; P:anatomical structure formation involved in morphogenesis; P:anatomical structure development	EC:1.14.14; EC:1.14.13	Acting on paired donors, with incorporation or reduction of molecular oxygen. The oxygen incorporated need not be derived from O(2); Acting on paired donors, with incorporation or reduction of molecular oxygen. The oxygen incorporated need not be derived from O(2)	IPR001128 (PRINTS); IPR002401 (PRINTS); IPR036396 (G3DSA:1.10.630.GENE3D); IPR028124 (PFAM); IPR001128 (PFAM); mobidb-lite (MOBIDB_LITE); PTHR24300 (PANTHER); PTHR24300:SF130 (PANTHER); IPR017972 (PROSITE_PATTERNS); CYTOPLASMIC_DOMAIN (PHOBIUS); NON_CYTOPLASMIC_DOMAIN (PHOBIUS); NON_CYTOPLASMIC_DOMAIN (PHOBIUS); CYTOPLASMIC_DOMAIN (PHOBIUS); TRANSMEMBRANE (PHOBIUS); TRANSMEMBRANE (PHOBIUS); TRANS…	F:GO:0005506; F:GO:0016705; F:GO:0020037; P:GO:0055114	F:iron ion binding; F:oxidoreductase activity, acting on paired donors, with incorporation or reduction of molecular oxygen; F:heme binding; P:oxidation-reduction process
TRUE	[INTERPRO, BLASTED, MAPPED, GO-SLIM]	DERPT_G6418	: Full= pterin-4-alpha-carbinolamine dehydratase Short=PHS ame: Full=4-alpha-hydroxy-tetrahydropterin dehydratase ame: Full=Pterin carbinolamine dehydratase Short=PCD	201	20	3.67585e-37	73.71	16	F:GO:0000988; C:GO:0005576; C:GO:0005654; C:GO:0005739; C:GO:0005829; P:GO:0006520; P:GO:0009056; P:GO:0009056; P:GO:0009058; P:GO:0009058; F:GO:0016491; F:GO:0016829; C:GO:0032991; P:GO:0034641; P:GO:0051186; P:GO:0065003	F:obsolete transcription factor activity, protein binding; C:extracellular region; C:nucleoplasm; C:mitochondrion; C:cytosol; P:cellular amino acid metabolic process; P:catabolic process; P:catabolic process; P:biosynthetic process; P:biosynthetic process; F:oxidoreductase activity; F:lyase activity; C:protein-containing complex; P:cellular nitrogen compound metabolic process; P:cofactor metaboli…	EC:1.14.16.1; EC:1.14.16; EC:4.2.1.96	Phenylalanine 4-monooxygenase; Acting on paired donors, with incorporation or reduction of molecular oxygen. The oxygen incorporated need not be derived from O(2); 4a-hydroxytetrahydrobiopterin dehydratase	IPR001533 (PFAM); IPR036428 (G3DSA:3.30.1360.GENE3D); PTHR12599 (PANTHER); PTHR12599:SF0 (PANTHER); IPR001533 (HAMAP); cd00914 (CDD); IPR036428 (SUPERFAMILY)	P:GO:0006729; F:GO:0008124	P:tetrahydrobiopterin biosynthetic process; F:4-alpha-hydroxytetrahydrobiopterin dehydratase activity
TRUE	[INTERPRO, BLASTED, MAPPED, GO-SLIM]	DERPT_G5108	: Full=Tryptophan 5-hydroxylase 1 ame: Full=Tryptophan 5-monooxygenase 1	599	20	0	72.23	23	P:GO:0000003; P:GO:0003013; C:GO:0005634; C:GO:0005739; C:GO:0005811; P:GO:0006520; P:GO:0006950; P:GO:0007267; P:GO:0007568; P:GO:0009056; P:GO:0009056; P:GO:0009058; P:GO:0009058; P:GO:0009790; P:GO:0016192; F:GO:0016491; P:GO:0019748; P:GO:0030154; C:GO:0031410; P:GO:0034641; F:GO:0043167; P:GO:0043473; P:GO:0050877	P:reproduction; P:circulatory system process; C:nucleus; C:mitochondrion; C:lipid droplet; P:cellular amino acid metabolic process; P:response to stress; P:cell-cell signaling; P:aging; P:catabolic process; P:catabolic process; P:biosynthetic process; P:biosynthetic process; P:embryo development; P:vesicle-mediated transport; F:oxidoreductase activity; P:secondary metabolic process; P:cell differ…	EC:1.14.16.2; EC:1.14.16.1; EC:1.14.16; EC:1.14.16.4	Tyrosine 3-monooxygenase; Phenylalanine 4-monooxygenase; Acting on paired donors, with incorporation or reduction of molecular oxygen. The oxygen incorporated need not be derived from O(2); Tryptophan 5-monooxygenase	Coil (COILS); IPR019774 (PRINTS); IPR036951 (G3DSA:1.10.800.GENE3D); IPR005963 (TIGRFAM); IPR019774 (PFAM); IPR019773 (PIRSF); mobidb-lite (MOBIDB_LITE); IPR001273 (PANTHER); PTHR11473:SF23 (PANTHER); IPR018301 (PROSITE_PATTERNS); IPR002912 (PROSITE_PROFILES); IPR019774 (PROSITE_PROFILES); IPR036329 (SUPERFAMILY); SSF55021 (SUPERFAMILY)	F:GO:0004497; F:GO:0004510; F:GO:0005506; P:GO:0009072; F:GO:0016714; P:GO:0042427; P:GO:0055114	F:monooxygenase activity; F:tryptophan 5-monooxygenase activity; F:iron ion binding; P:aromatic amino acid family metabolic process; F:oxidoreductase activity, acting on paired donors, with incorporation or reduction of molecular oxygen, reduced pteridine as one donor, and incorporation of one atom of oxygen; P:serotonin biosynthetic process; P:oxidation-reduction process
TRUE	[INTERPRO, BLASTED, MAPPED, GO-SLIM]	DERPT_G3376	: Full=Tryptophan 5-hydroxylase 1 ame: Full=Tryptophan 5-monooxygenase 1	463	20	0	74.7	30	P:GO:0000003; P:GO:0003013; C:GO:0005576; C:GO:0005634; C:GO:0005739; C:GO:0005783; C:GO:0005811; C:GO:0005829; C:GO:0005886; P:GO:0006464; P:GO:0006520; P:GO:0006950; P:GO:0007267; P:GO:0007568; P:GO:0009056; P:GO:0009056; P:GO:0009058; P:GO:0009058; P:GO:0009790; P:GO:0016192; F:GO:0016491; P:GO:0019748; F:GO:0019899; P:GO:0030154; C:GO:0031410; P:GO:0034641; F:GO:0043167; P:GO:0043473; P:GO:00…	P:reproduction; P:circulatory system process; C:extracellular region; C:nucleus; C:mitochondrion; C:endoplasmic reticulum; C:lipid droplet; C:cytosol; C:plasma membrane; P:cellular protein modification process; P:cellular amino acid metabolic process; P:response to stress; P:cell-cell signaling; P:aging; P:catabolic process; P:catabolic process; P:biosynthetic process; P:biosynthetic process; P:e…	EC:1.14.16.2; EC:1.14.16.1; EC:1.14.16; EC:1.14.16.4	Tyrosine 3-monooxygenase; Phenylalanine 4-monooxygenase; Acting on paired donors, with incorporation or reduction of molecular oxygen. The oxygen incorporated need not be derived from O(2); Tryptophan 5-monooxygenase	IPR019774 (PRINTS); IPR019773 (PIRSF); IPR036951 (G3DSA:1.10.800.GENE3D); IPR019774 (PFAM); IPR005961 (TIGRFAM); mobidb-lite (MOBIDB_LITE); IPR001273 (PANTHER); IPR019774 (PROSITE_PROFILES); IPR002912 (PROSITE_PROFILES); cd03347 (CDD); SSF55021 (SUPERFAMILY); IPR036329 (SUPERFAMILY)	F:GO:0004497; F:GO:0004505; F:GO:0005506; P:GO:0006559; P:GO:0009072; F:GO:0016714; P:GO:0055114	F:monooxygenase activity; F:phenylalanine 4-monooxygenase activity; F:iron ion binding; P:L-phenylalanine catabolic process; P:aromatic amino acid family metabolic process; F:oxidoreductase activity, acting on paired donors, with incorporation or reduction of molecular oxygen, reduced pteridine as one donor, and incorporation of one atom of oxygen; P:oxidation-reduction process
TRUE	[INTERPRO, BLASTED, MAPPED, GO-SLIM]	DERPT_G6014	: Full=Peptidyl-glycine alpha-amidating monooxygenase Short=PAM Includes: ame: Full=Peptidylglycine alpha-hydroxylating monooxygenase Short=PHM Includes: ame: Full=Peptidyl-alpha-hydroxyglycine alpha-amidating lyase ame: Full=Peptidylamidoglycolate lyase Short=PAL Flags: Precursor	389	20	1.02413e-92	46.05	4	F:GO:0016491; C:GO:0031410; P:GO:0034641; F:GO:0043167	F:oxidoreductase activity; C:cytoplasmic vesicle; P:cellular nitrogen compound metabolic process; F:ion binding	EC:1.14.17	Acting on paired donors, with incorporation or reduction of molecular oxygen. The oxygen incorporated need not be derived from O(2)	IPR000323 (PFAM); IPR024548 (PFAM); IPR036939 (G3DSA:2.60.120.GENE3D); IPR014784 (G3DSA:2.60.120.GENE3D); PTHR10680 (PANTHER); PTHR10680:SF14 (PANTHER); IPR014783 (PROSITE_PATTERNS); NON_CYTOPLASMIC_DOMAIN (PHOBIUS); TRANSMEMBRANE (PHOBIUS); CYTOPLASMIC_DOMAIN (PHOBIUS); IPR008977 (SUPERFAMILY); IPR008977 (SUPERFAMILY)	F:GO:0003824; F:GO:0004497; F:GO:0005507; F:GO:0016715; P:GO:0055114	F:catalytic activity; F:monooxygenase activity; F:copper ion binding; F:oxidoreductase activity, acting on paired donors, with incorporation or reduction of molecular oxygen, reduced ascorbate as one donor, and incorporation of one atom of oxygen; P:oxidation-reduction process
TRUE	[INTERPRO, BLASTED, MAPPED, GO-SLIM]	DERPT_G12218	: Full= isoforms D E Flags: Precursor	131	2	1.42019e-27	65.09	9	F:GO:0005198; C:GO:0005634; C:GO:0005694; C:GO:0005856; P:GO:0006520; P:GO:0007010; P:GO:0007049; F:GO:0016491; P:GO:0022607	F:structural molecule activity; C:nucleus; C:chromosome; C:cytoskeleton; P:cellular amino acid metabolic process; P:cytoskeleton organization; P:cell cycle; F:oxidoreductase activity; P:cellular component assembly	EC:1.14.17.1; EC:1.14.17	Dopamine beta-monooxygenase; Acting on paired donors, with incorporation or reduction of molecular oxygen. The oxygen incorporated need not be derived from O(2)	IPR019545 (SMART); IPR019545 (PFAM); PTHR24036:SF10 (PANTHER); PTHR24036 (PANTHER); SIGNAL_PEPTIDE_H_REGION (PHOBIUS); NON_CYTOPLASMIC_DOMAIN (PHOBIUS); SIGNAL_PEPTIDE_N_REGION (PHOBIUS); SIGNAL_PEPTIDE (PHOBIUS); SIGNAL_PEPTIDE_C_REGION (PHOBIUS); IPR019545 (PROSITE_PROFILES); SignalP-noTM (SIGNALP_EUK)	no GO terms	no GO terms
TRUE	[INTERPRO, BLASTED, MAPPED, GO-SLIM]	DERPT_G7365	: Full=Acyl- desaturase ame: Full=Delta(9)-desaturase Short=Delta-9 desaturase ame: Full=Fatty acid desaturase ame: Full=Stearoyl- desaturase	960	20	1.33259e-77	61.21	17	P:GO:0002376; C:GO:0005783; P:GO:0006629; P:GO:0006790; P:GO:0006950; P:GO:0007165; P:GO:0009058; P:GO:0009058; F:GO:0016491; P:GO:0030154; P:GO:0040007; P:GO:0042592; F:GO:0043167; P:GO:0044281; P:GO:0044403; P:GO:0048856; P:GO:0051186	P:immune system process; C:endoplasmic reticulum; P:lipid metabolic process; P:sulfur compound metabolic process; P:response to stress; P:signal transduction; P:biosynthetic process; P:biosynthetic process; F:oxidoreductase activity; P:cell differentiation; P:growth; P:homeostatic process; F:ion binding; P:small molecule metabolic process; P:symbiont process; P:anatomical structure development; P…	EC:1.14.19.1; EC:1.14.19	Stearoyl-CoA 9-desaturase; Acting on paired donors, with incorporation or reduction of molecular oxygen. The oxygen incorporated need not be derived from O(2)	Coil (COILS); Coil (COILS); Coil (COILS); Coil (COILS); IPR015876 (PRINTS); IPR005804 (PFAM); G3DSA:3.10.20.90 (GENE3D); IPR000159 (PFAM); mobidb-lite (MOBIDB_LITE); mobidb-lite (MOBIDB_LITE); mobidb-lite (MOBIDB_LITE); mobidb-lite (MOBIDB_LITE); PTHR11351:SF31 (PANTHER); IPR015876 (PANTHER); IPR001522 (PROSITE_PATTERNS); NON_CYTOPLASMIC_DOMAIN (PHOBIUS); CYTOPLASMIC_DOMAIN (PHOBIUS); NON_CYTOPLA…	P:GO:0006629; P:GO:0007165; F:GO:0016717; P:GO:0055114	P:lipid metabolic process; P:signal transduction; F:oxidoreductase activity, acting on paired donors, with oxidation of a pair of donors resulting in the reduction of molecular oxygen to two molecules of water; P:oxidation-reduction process
TRUE	[INTERPRO, BLASTED, MAPPED, GO-SLIM]	DERPT_G5028	: Full=Cytochrome b5	579	20	2.37927e-39	67.45	17	P:GO:0002376; C:GO:0005739; C:GO:0005773; C:GO:0005783; C:GO:0005811; C:GO:0005886; P:GO:0006629; P:GO:0007049; P:GO:0008283; P:GO:0009058; P:GO:0009058; C:GO:0009536; C:GO:0009579; F:GO:0016491; P:GO:0030154; P:GO:0044281; P:GO:0048856	P:immune system process; C:mitochondrion; C:vacuole; C:endoplasmic reticulum; C:lipid droplet; C:plasma membrane; P:lipid metabolic process; P:cell cycle; P:cell proliferation; P:biosynthetic process; P:biosynthetic process; C:plastid; C:thylakoid; F:oxidoreductase activity; P:cell differentiation; P:small molecule metabolic process; P:anatomical structure development	EC:1.14.19.1; EC:1.14.19	Stearoyl-CoA 9-desaturase; Acting on paired donors, with incorporation or reduction of molecular oxygen. The oxygen incorporated need not be derived from O(2)	IPR001199 (PRINTS); IPR001199 (SMART); IPR018629 (PFAM); IPR001199 (PFAM); IPR036400 (G3DSA:3.10.120.GENE3D); mobidb-lite (MOBIDB_LITE); PTHR19359:SF37 (PANTHER); PTHR19359 (PANTHER); IPR018506 (PROSITE_PATTERNS); TRANSMEMBRANE (PHOBIUS); NON_CYTOPLASMIC_DOMAIN (PHOBIUS); TRANSMEMBRANE (PHOBIUS); TRANSMEMBRANE (PHOBIUS); CYTOPLASMIC_DOMAIN (PHOBIUS); CYTOPLASMIC_DOMAIN (PHOBIUS); TRANSMEMBRANE (P…	C:GO:0016021; F:GO:0020037	C:integral component of membrane; F:heme binding
TRUE	[INTERPRO, BLASTED, MAPPED, GO-SLIM]	DERPT_G8408	: Full=Acyl- desaturase ame: Full=Delta(9)-desaturase Short=Delta-9 desaturase ame: Full=Fatty acid desaturase ame: Full=Stearoyl- desaturase	1321	20	1.73681e-103	68.1	24	P:GO:0002376; C:GO:0005576; C:GO:0005783; P:GO:0005975; P:GO:0005975; P:GO:0006091; P:GO:0006629; P:GO:0006790; P:GO:0006950; P:GO:0009056; P:GO:0009056; P:GO:0009058; P:GO:0009058; F:GO:0016301; F:GO:0016491; P:GO:0030154; P:GO:0034641; P:GO:0040007; P:GO:0042592; F:GO:0043167; P:GO:0044281; P:GO:0044403; P:GO:0048856; P:GO:0051186	P:immune system process; C:extracellular region; C:endoplasmic reticulum; P:carbohydrate metabolic process; P:carbohydrate metabolic process; P:generation of precursor metabolites and energy; P:lipid metabolic process; P:sulfur compound metabolic process; P:response to stress; P:catabolic process; P:catabolic process; P:biosynthetic process; P:biosynthetic process; F:kinase activity; F:oxidoreduc…	EC:1.14.19.1; EC:1.14.19; EC:2.7.1.1	Stearoyl-CoA 9-desaturase; Acting on paired donors, with incorporation or reduction of molecular oxygen. The oxygen incorporated need not be derived from O(2); Hexokinase	Coil (COILS); IPR015876 (PRINTS); IPR002557 (SMART); G3DSA:2.170.140.10 (GENE3D); G3DSA:3.40.367.20 (GENE3D); G3DSA:3.30.420.40 (GENE3D); IPR022673 (PFAM); IPR005804 (PFAM); IPR002557 (PFAM); IPR022672 (PFAM); mobidb-lite (MOBIDB_LITE); PTHR11351:SF32 (PANTHER); IPR015876 (PANTHER); PTHR11351:SF32 (PANTHER); IPR001522 (PROSITE_PATTERNS); TRANSMEMBRANE (PHOBIUS); TRANSMEMBRANE (PHOBIUS); TRANSMEMB…	P:GO:0001678; F:GO:0004396; F:GO:0005524; F:GO:0005536; C:GO:0005576; P:GO:0005975; P:GO:0006030; P:GO:0006629; F:GO:0008061; F:GO:0016717; F:GO:0016773; P:GO:0055114	P:cellular glucose homeostasis; F:hexokinase activity; F:ATP binding; F:glucose binding; C:extracellular region; P:carbohydrate metabolic process; P:chitin metabolic process; P:lipid metabolic process; F:chitin binding; F:oxidoreductase activity, acting on paired donors, with oxidation of a pair of donors resulting in the reduction of molecular oxygen to two molecules of water; F:phosphotransfera…
TRUE	[INTERPRO, BLASTED, MAPPED, GO-SLIM]	DERPT_G8906	: Full=Glutamine synthetase Short=GS ame: Full=Glutamate--ammonia ligase	2611	20	8.26892e-148	72.35	25	C:GO:0005576; C:GO:0005634; C:GO:0005739; C:GO:0005783; C:GO:0005811; C:GO:0005856; P:GO:0006520; P:GO:0006629; P:GO:0006950; P:GO:0007005; P:GO:0007267; P:GO:0008283; P:GO:0009056; P:GO:0009056; P:GO:0009058; P:GO:0009058; P:GO:0016192; F:GO:0016491; F:GO:0016829; F:GO:0016874; C:GO:0032991; F:GO:0043167; P:GO:0048856; P:GO:0065003; P:GO:0071554	C:extracellular region; C:nucleus; C:mitochondrion; C:endoplasmic reticulum; C:lipid droplet; C:cytoskeleton; P:cellular amino acid metabolic process; P:lipid metabolic process; P:response to stress; P:mitochondrion organization; P:cell-cell signaling; P:cell proliferation; P:catabolic process; P:catabolic process; P:biosynthetic process; P:biosynthetic process; P:vesicle-mediated transport; F:ox…	EC:1.14.19; EC:6.3.1.2	Acting on paired donors, with incorporation or reduction of molecular oxygen. The oxygen incorporated need not be derived from O(2); Glutamine synthetase	IPR015876 (PRINTS); IPR008146 (SMART); IPR019515 (PFAM); IPR005804 (PFAM); IPR008146 (PFAM); IPR036651 (G3DSA:3.10.20.GENE3D); G3DSA:3.30.590.40 (GENE3D); IPR008147 (PFAM); IPR019514 (PFAM); IPR015876 (PANTHER); PTHR11351:SF32 (PANTHER); IPR015876 (PANTHER); PTHR11351:SF32 (PANTHER); IPR027302 (PROSITE_PATTERNS); IPR027303 (PROSITE_PATTERNS); IPR001522 (PROSITE_PATTERNS); IPR001522 (PROSITE_PATTE…	F:GO:0003824; F:GO:0004356; P:GO:0006542; P:GO:0006629; P:GO:0006807; F:GO:0016717; P:GO:0055114	F:catalytic activity; F:glutamate-ammonia ligase activity; P:glutamine biosynthetic process; P:lipid metabolic process; P:nitrogen compound metabolic process; F:oxidoreductase activity, acting on paired donors, with oxidation of a pair of donors resulting in the reduction of molecular oxygen to two molecules of water; P:oxidation-reduction process
TRUE	[INTERPRO, BLASTED, MAPPED, GO-SLIM]	DERPT_G4415	: Full=Superoxide dismutase	210	20	2.45513e-54	58.52	3	C:GO:0005829; F:GO:0016491; F:GO:0043167	C:cytosol; F:oxidoreductase activity; F:ion binding	EC:1.15.1.1	Superoxide dismutase	IPR001189 (PRINTS); IPR019832 (PFAM); IPR036314 (G3DSA:2.40.500.GENE3D); IPR001189 (PIRSF); IPR036324 (G3DSA:1.10.287.GENE3D); IPR019831 (PFAM); PTHR42769 (PANTHER); PTHR42769:SF3 (PANTHER); IPR019833 (PROSITE_PATTERNS); IPR036324 (SUPERFAMILY); IPR036314 (SUPERFAMILY)	F:GO:0004784; P:GO:0006801; F:GO:0046872; P:GO:0055114	F:superoxide dismutase activity; P:superoxide metabolic process; F:metal ion binding; P:oxidation-reduction process
TRUE	[INTERPRO, BLASTED, MAPPED, MANUAL, GO-SLIM]	DERPT_G921	Allergen Homolog (Sola ISOD, Ole5): Full=Superoxide dismutase	1699	20	1.82395e-49	70.28	57	P:GO:0000187; P:GO:0001541; P:GO:0001819; P:GO:0001895; P:GO:0002262; F:GO:0004784; F:GO:0005507; C:GO:0005615; C:GO:0005634; C:GO:0005739; C:GO:0005764; C:GO:0005777; C:GO:0005829; C:GO:0005886; C:GO:0005955; P:GO:0006302; P:GO:0006309; P:GO:0006749; P:GO:0006879; P:GO:0007283; P:GO:0007566; P:GO:0007569; P:GO:0007605; P:GO:0007626; P:GO:0008217; F:GO:0008270; P:GO:0009408; C:GO:0009507; P:GO:00…	P:activation of MAPK activity; P:ovarian follicle development; P:positive regulation of cytokine production; P:retina homeostasis; P:myeloid cell homeostasis; F:superoxide dismutase activity; F:copper ion binding; C:extracellular space; C:nucleus; C:mitochondrion; C:lysosome; C:peroxisome; C:cytosol; C:plasma membrane; C:calcineurin complex; P:double-strand break repair; P:apoptotic DNA fragmenta…	EC:1.15.1.1	Superoxide dismutase	Coil (COILS); Coil (COILS); Coil (COILS); Coil (COILS); IPR001424 (PRINTS); IPR002110 (SMART); IPR036423 (G3DSA:2.60.40.GENE3D); IPR001424 (PFAM); IPR036770 (G3DSA:1.25.40.GENE3D); IPR020683 (PFAM); mobidb-lite (MOBIDB_LITE); mobidb-lite (MOBIDB_LITE); mobidb-lite (MOBIDB_LITE); mobidb-lite (MOBIDB_LITE); mobidb-lite (MOBIDB_LITE); mobidb-lite (MOBIDB_LITE); mobidb-lite (MOBIDB_LITE); mobidb-lite…	F:GO:0005515; P:GO:0006801; F:GO:0046872	F:protein binding; P:superoxide metabolic process; F:metal ion binding
TRUE	[INTERPRO, BLASTED, MAPPED, MANUAL, GO-SLIM]	DERPT_G7727	Proposed Pan-Allergen, Allergen Homolog (Hom sNmSOD, Dro MnSOD, Hev b10, Alt a MnSOD: Full=Superoxide dismutase	231	20	2.44777e-100	76.09	45	P:GO:0001315; P:GO:0001836; P:GO:0001889; P:GO:0002119; P:GO:0003032; P:GO:0003069; F:GO:0003677; F:GO:0004784; P:GO:0006357; P:GO:0006749; P:GO:0007507; P:GO:0007605; P:GO:0007626; P:GO:0008630; P:GO:0010332; P:GO:0014823; P:GO:0019430; F:GO:0019825; F:GO:0019899; P:GO:0022904; P:GO:0030097; F:GO:0030145; P:GO:0031667; P:GO:0032364; P:GO:0042542; P:GO:0042554; C:GO:0042645; F:GO:0042803; C:GO:00…	P:age-dependent response to reactive oxygen species; P:release of cytochrome c from mitochondria; P:liver development; P:nematode larval development; P:detection of oxygen; P:acetylcholine-mediated vasodilation involved in regulation of systemic arterial blood pressure; F:DNA binding; F:superoxide dismutase activity; P:regulation of transcription by RNA polymerase II; P:glutathione metabolic proc…	EC:1.15.1.1	Superoxide dismutase	Coil (COILS); IPR001189 (PRINTS); IPR019832 (PFAM); IPR001189 (PIRSF); IPR036324 (G3DSA:1.10.287.GENE3D); IPR019831 (PFAM); IPR036314 (G3DSA:2.40.500.GENE3D); PTHR11404 (PANTHER); PTHR11404:SF6 (PANTHER); IPR019833 (PROSITE_PATTERNS); SignalP-TM (SIGNALP_GRAM_POSITIVE); IPR036324 (SUPERFAMILY); IPR036314 (SUPERFAMILY)	F:GO:0004784; P:GO:0006801; F:GO:0046872; P:GO:0055114	F:superoxide dismutase activity; P:superoxide metabolic process; F:metal ion binding; P:oxidation-reduction process
TRUE	[INTERPRO, BLASTED, MAPPED, MANUAL, GO-SLIM]	DERPT_G114	Proposed Stren-Allergen, Allergen Homolog (ole e5, Sola 1 SOD): Full=Superoxide dismutase	152	20	3.28532e-71	77.92	48	P:GO:0000187; P:GO:0001541; P:GO:0001819; P:GO:0001895; P:GO:0002262; F:GO:0004784; F:GO:0005507; C:GO:0005615; C:GO:0005634; C:GO:0005739; C:GO:0005829; C:GO:0005886; C:GO:0005955; P:GO:0006302; P:GO:0006309; P:GO:0006749; P:GO:0006879; P:GO:0007283; P:GO:0007566; P:GO:0007569; P:GO:0007605; P:GO:0007626; P:GO:0008217; F:GO:0008270; P:GO:0009408; P:GO:0019226; P:GO:0019430; F:GO:0030346; C:GO:00…	P:activation of MAPK activity; P:ovarian follicle development; P:positive regulation of cytokine production; P:retina homeostasis; P:myeloid cell homeostasis; F:superoxide dismutase activity; F:copper ion binding; C:extracellular space; C:nucleus; C:mitochondrion; C:cytosol; C:plasma membrane; C:calcineurin complex; P:double-strand break repair; P:apoptotic DNA fragmentation; P:glutathione metabo…	EC:1.15.1.1	Superoxide dismutase	IPR001424 (PRINTS); IPR001424 (PFAM); IPR036423 (G3DSA:2.60.40.GENE3D); IPR024134 (PANTHER); PTHR10003:SF34 (PANTHER); IPR018152 (PROSITE_PATTERNS); IPR018152 (PROSITE_PATTERNS); IPR001424 (CDD); IPR036423 (SUPERFAMILY)	F:GO:0004784; P:GO:0006801; F:GO:0046872; P:GO:0055114	F:superoxide dismutase activity; P:superoxide metabolic process; F:metal ion binding; P:oxidation-reduction process
TRUE	[INTERPRO, BLASTED, MAPPED, GO-SLIM]	DERPT_G5527	: Full=Electron transfer flavo -ubiquinone mitochondrial Short=ETF-QO Short=ETF-ubiquinone oxidoreductase ame: Full=Electron-transferring-flavo dehydrogenase Short=ETF dehydrogenase Flags: Precursor	597	20	0	65.16	12	C:GO:0005739; P:GO:0006091; P:GO:0006520; P:GO:0006629; P:GO:0006810; P:GO:0006950; P:GO:0009056; P:GO:0009056; F:GO:0016491; C:GO:0032991; F:GO:0043167; P:GO:0048856	C:mitochondrion; P:generation of precursor metabolites and energy; P:cellular amino acid metabolic process; P:lipid metabolic process; P:transport; P:response to stress; P:catabolic process; P:catabolic process; F:oxidoreductase activity; C:protein-containing complex; F:ion binding; P:anatomical structure development	EC:1.16.8; EC:1.5.5.1	Oxidizing metal ions; Electron-transferring-flavoprotein dehydrogenase	PR00411 (PRINTS); G3DSA:3.30.9.90 (GENE3D); PF05187 (PFAM); IPR036188 (G3DSA:3.50.50.GENE3D); G3DSA:3.30.70.20 (GENE3D); IPR023753 (PFAM); PTHR10617:SF107 (PANTHER); PTHR10617 (PANTHER); TRANSMEMBRANE (PHOBIUS); NON_CYTOPLASMIC_DOMAIN (PHOBIUS); CYTOPLASMIC_DOMAIN (PHOBIUS); IPR017896 (PROSITE_PROFILES); SSF54373 (SUPERFAMILY); IPR036188 (SUPERFAMILY); SSF54862 (SUPERFAMILY)	F:GO:0016491; P:GO:0055114	F:oxidoreductase activity; P:oxidation-reduction process
TRUE	[INTERPRO, BLASTED, MAPPED, GO-SLIM]	DERPT_G6626	: Full=Ribonucleoside-diphosphate reductase large subunit ame: Full=Ribonucleotide reductase large subunit	5422	20	0	81.13	18	P:GO:0000003; C:GO:0005576; C:GO:0005635; C:GO:0005739; C:GO:0005829; P:GO:0006259; P:GO:0006464; P:GO:0006950; P:GO:0008219; P:GO:0009058; P:GO:0009058; P:GO:0009790; F:GO:0016491; P:GO:0040007; P:GO:0040011; F:GO:0043167; P:GO:0044281; P:GO:0065003	P:reproduction; C:extracellular region; C:nuclear envelope; C:mitochondrion; C:cytosol; P:DNA metabolic process; P:cellular protein modification process; P:response to stress; P:cell death; P:biosynthetic process; P:biosynthetic process; P:embryo development; F:oxidoreductase activity; P:growth; P:locomotion; F:ion binding; P:small molecule metabolic process; P:protein-containing complex assembly	EC:1.17.4; EC:1.17.4.1	Acting on CH or CH(2) groups; Ribonucleoside-diphosphate reductase	Coil (COILS); Coil (COILS); Coil (COILS); IPR000788 (PRINTS); IPR018123 (SMART); IPR015940 (SMART); IPR000569 (SMART); IPR013346 (TIGRFAM); IPR015940 (PFAM); IPR004170 (PFAM); IPR037197 (G3DSA:3.30.720.GENE3D); G3DSA:3.20.70.20 (GENE3D); IPR013509 (PFAM); G3DSA:3.90.1750.10 (GENE3D); IPR000569 (PFAM); G3DSA:1.10.8.10 (GENE3D); IPR025527 (PFAM); IPR010309 (PFAM); G3DSA:3.30.2160.10 (GENE3D); G3DSA…	F:GO:0004748; F:GO:0004842; F:GO:0005515; F:GO:0005524; P:GO:0006260; F:GO:0008270; P:GO:0055114	F:ribonucleoside-diphosphate reductase activity, thioredoxin disulfide as acceptor; F:ubiquitin-protein transferase activity; F:protein binding; F:ATP binding; P:DNA replication; F:zinc ion binding; P:oxidation-reduction process
TRUE	[INTERPRO, BLASTED, MAPPED, GO-SLIM]	DERPT_G2756	: Full=Ribonucleoside-diphosphate reductase large subunit ame: Full=Ribonucleotide reductase large subunit	3285	20	0	73.91	28	P:GO:0000003; C:GO:0005576; C:GO:0005635; C:GO:0005694; C:GO:0005730; C:GO:0005739; C:GO:0005829; P:GO:0005975; P:GO:0005975; P:GO:0006091; P:GO:0006259; P:GO:0006464; P:GO:0006950; P:GO:0008219; P:GO:0009056; P:GO:0009056; P:GO:0009058; P:GO:0009058; F:GO:0016301; F:GO:0016491; F:GO:0016779; F:GO:0016853; P:GO:0040007; F:GO:0043167; P:GO:0044281; P:GO:0048856; P:GO:0051186; P:GO:0065003	P:reproduction; C:extracellular region; C:nuclear envelope; C:chromosome; C:nucleolus; C:mitochondrion; C:cytosol; P:carbohydrate metabolic process; P:carbohydrate metabolic process; P:generation of precursor metabolites and energy; P:DNA metabolic process; P:cellular protein modification process; P:response to stress; P:cell death; P:catabolic process; P:catabolic process; P:biosynthetic process…	EC:1.17.4; EC:1.17.4.1; EC:5.3.1.9; EC:2.7.7.6	Acting on CH or CH(2) groups; Ribonucleoside-diphosphate reductase; Glucose-6-phosphate isomerase; DNA-directed RNA polymerase	IPR000788 (PRINTS); IPR000719 (SMART); IPR001672 (PFAM); G3DSA:1.20.930.80 (GENE3D); G3DSA:3.30.200.20 (GENE3D); G3DSA:3.40.50.10490 (GENE3D); G3DSA:1.10.238.10 (GENE3D); IPR000719 (PFAM); IPR007238 (PFAM); IPR002048 (PFAM); G3DSA:3.20.70.20 (GENE3D); G3DSA:3.40.50.10490 (GENE3D); IPR000788 (PFAM); IPR023096 (G3DSA:1.10.1390.GENE3D); IPR013346 (TIGRFAM); IPR013509 (PFAM); G3DSA:1.10.510.10 (GENE3…	F:GO:0003896; F:GO:0004347; F:GO:0004672; F:GO:0004748; F:GO:0005509; F:GO:0005524; P:GO:0006094; P:GO:0006096; P:GO:0006260; P:GO:0006269; P:GO:0006468; P:GO:0055114	F:DNA primase activity; F:glucose-6-phosphate isomerase activity; F:protein kinase activity; F:ribonucleoside-diphosphate reductase activity, thioredoxin disulfide as acceptor; F:calcium ion binding; F:ATP binding; P:gluconeogenesis; P:glycolytic process; P:DNA replication; P:DNA replication, synthesis of RNA primer; P:protein phosphorylation; P:oxidation-reduction process
TRUE	[INTERPRO, BLASTED, MAPPED, GO-SLIM]	DERPT_G5965	: Full=NADPH:adrenodoxin mitochondrial Short=AR Short=Adrenodoxin reductase ame: Full=Ferredoxin--NADP(+) reductase Short=Ferredoxin reductase Flags: Precursor	520	20	2.15776e-145	54.98	13	C:GO:0005739; C:GO:0005886; P:GO:0006091; P:GO:0006520; P:GO:0006629; P:GO:0009058; P:GO:0009058; C:GO:0009536; F:GO:0016491; P:GO:0034641; F:GO:0043167; P:GO:0048856; P:GO:0051186	C:mitochondrion; C:plasma membrane; P:generation of precursor metabolites and energy; P:cellular amino acid metabolic process; P:lipid metabolic process; P:biosynthetic process; P:biosynthetic process; C:plastid; F:oxidoreductase activity; P:cellular nitrogen compound metabolic process; F:ion binding; P:anatomical structure development; P:cofactor metabolic process	EC:1.18.1	Acting on iron-sulfur proteins as donors	PR00419 (PRINTS); G3DSA:3.40.50.720 (GENE3D); IPR021163 (PIRSF); IPR036188 (G3DSA:3.50.50.GENE3D); IPR023753 (PFAM); PTHR11938 (PANTHER); PTHR11938:SF91 (PANTHER); SSF51971 (SUPERFAMILY)	F:GO:0016491; P:GO:0055114	F:oxidoreductase activity; P:oxidation-reduction process
TRUE	[INTERPRO, BLASTED, MAPPED, GO-SLIM]	DERPT_G5361	: Full=Succinate-semialdehyde mitochondrial ame: Full=Aldehyde dehydrogenase family 5 member A1 ame: Full=NAD(+)-dependent succinic semialdehyde dehydrogenase Flags: Precursor	548	20	0	69.8	19	C:GO:0005739; P:GO:0005975; P:GO:0005975; P:GO:0006091; P:GO:0006520; P:GO:0006629; P:GO:0006790; P:GO:0006950; P:GO:0009056; P:GO:0009056; P:GO:0009058; P:GO:0009058; C:GO:0009536; F:GO:0016491; P:GO:0034641; F:GO:0043167; P:GO:0048856; P:GO:0051186; P:GO:0065003	C:mitochondrion; P:carbohydrate metabolic process; P:carbohydrate metabolic process; P:generation of precursor metabolites and energy; P:cellular amino acid metabolic process; P:lipid metabolic process; P:sulfur compound metabolic process; P:response to stress; P:catabolic process; P:catabolic process; P:biosynthetic process; P:biosynthetic process; C:plastid; F:oxidoreductase activity; P:cellula…	EC:1.2.1.16; EC:1.2.1.24; EC:1.2.1.3	Succinate-semialdehyde dehydrogenase (NAD(P)(+)); Succinate-semialdehyde dehydrogenase (NAD(+)); Aldehyde dehydrogenase (NAD(+))	IPR016162 (G3DSA:3.40.605.GENE3D); IPR016163 (G3DSA:3.40.309.GENE3D); IPR015590 (PFAM); PTHR43353:SF5 (PANTHER); PTHR43353 (PANTHER); IPR016160 (PROSITE_PATTERNS); SIGNAL_PEPTIDE_N_REGION (PHOBIUS); SIGNAL_PEPTIDE_H_REGION (PHOBIUS); SIGNAL_PEPTIDE_C_REGION (PHOBIUS); NON_CYTOPLASMIC_DOMAIN (PHOBIUS); SIGNAL_PEPTIDE (PHOBIUS); cd07103 (CDD); IPR016161 (SUPERFAMILY)	P:GO:0008152; F:GO:0016491; F:GO:0016620; P:GO:0055114	P:metabolic process; F:oxidoreductase activity; F:oxidoreductase activity, acting on the aldehyde or oxo group of donors, NAD or NADP as acceptor; P:oxidation-reduction process
TRUE	[INTERPRO, BLASTED, MAPPED, GO-SLIM]	DERPT_G10946	: Full=Succinate-- ligase	438	20	2.63656e-128	65.69	12	C:GO:0005634; C:GO:0005739; C:GO:0005815; C:GO:0005886; P:GO:0006091; P:GO:0006790; F:GO:0016491; F:GO:0016874; C:GO:0032991; F:GO:0043167; P:GO:0044281; P:GO:0051186	C:nucleus; C:mitochondrion; C:microtubule organizing center; C:plasma membrane; P:generation of precursor metabolites and energy; P:sulfur compound metabolic process; F:oxidoreductase activity; F:ligase activity; C:protein-containing complex; F:ion binding; P:small molecule metabolic process; P:cofactor metabolic process	EC:1.2.1.24; EC:6.2.1.4	Succinate-semialdehyde dehydrogenase (NAD(+)); Succinate--CoA ligase (GDP-forming)	IPR005811 (PFAM); G3DSA:3.30.470.20 (GENE3D); IPR005809 (TIGRFAM); IPR005809 (PIRSF); IPR013650 (PFAM); IPR016102 (G3DSA:3.40.50.GENE3D); IPR013815 (G3DSA:3.30.1490.GENE3D); IPR005809 (PANTHER); PTHR11815:SF5 (PANTHER); IPR017866 (PROSITE_PATTERNS); IPR011761 (PROSITE_PROFILES); IPR005809 (HAMAP); IPR016102 (SUPERFAMILY); SSF56059 (SUPERFAMILY)	F:GO:0003824; F:GO:0005524; P:GO:0006099; P:GO:0008152; F:GO:0046872	F:catalytic activity; F:ATP binding; P:tricarboxylic acid cycle; P:metabolic process; F:metal ion binding
TRUE	[INTERPRO, BLASTED, MAPPED, GO-SLIM]	DERPT_G7270	: Full=Succinate-- ligase	444	20	0	74.18	14	C:GO:0005576; C:GO:0005634; C:GO:0005739; C:GO:0005794; C:GO:0005815; C:GO:0005886; P:GO:0006091; P:GO:0006790; F:GO:0016491; F:GO:0016874; C:GO:0032991; F:GO:0043167; P:GO:0044281; P:GO:0051186	C:extracellular region; C:nucleus; C:mitochondrion; C:Golgi apparatus; C:microtubule organizing center; C:plasma membrane; P:generation of precursor metabolites and energy; P:sulfur compound metabolic process; F:oxidoreductase activity; F:ligase activity; C:protein-containing complex; F:ion binding; P:small molecule metabolic process; P:cofactor metabolic process	EC:1.2.1.24; EC:6.2.1.5; EC:6.2.1.4	Succinate-semialdehyde dehydrogenase (NAD(+)); Succinate--CoA ligase (ADP-forming); Succinate--CoA ligase (GDP-forming)	IPR013815 (G3DSA:3.30.1490.GENE3D); G3DSA:3.30.470.20 (GENE3D); IPR005809 (TIGRFAM); IPR005811 (PFAM); IPR005809 (PIRSF); IPR013650 (PFAM); IPR016102 (G3DSA:3.40.50.GENE3D); PTHR11815:SF1 (PANTHER); IPR005809 (PANTHER); IPR017866 (PROSITE_PATTERNS); IPR011761 (PROSITE_PROFILES); IPR005809 (HAMAP); IPR034723 (HAMAP); IPR016102 (SUPERFAMILY); SSF56059 (SUPERFAMILY)	F:GO:0003824; F:GO:0005524; C:GO:0005739; P:GO:0006099; P:GO:0008152; F:GO:0046872	F:catalytic activity; F:ATP binding; C:mitochondrion; P:tricarboxylic acid cycle; P:metabolic process; F:metal ion binding
TRUE	[INTERPRO, BLASTED, MAPPED, GO-SLIM]	DERPT_G9981	: Full=Probable methylmalonate-semialdehyde dehydrogenase [acylating] mitochondrial Short=MMSDH Short=Malonate-semialdehyde dehydrogenase	535	20	0	75.62	18	C:GO:0005576; C:GO:0005654; C:GO:0005739; P:GO:0005975; P:GO:0005975; P:GO:0006091; P:GO:0006520; P:GO:0006629; P:GO:0006950; P:GO:0009056; P:GO:0009056; P:GO:0009058; P:GO:0009058; F:GO:0016491; P:GO:0030154; P:GO:0034641; F:GO:0043167; P:GO:0051186	C:extracellular region; C:nucleoplasm; C:mitochondrion; P:carbohydrate metabolic process; P:carbohydrate metabolic process; P:generation of precursor metabolites and energy; P:cellular amino acid metabolic process; P:lipid metabolic process; P:response to stress; P:catabolic process; P:catabolic process; P:biosynthetic process; P:biosynthetic process; F:oxidoreductase activity; P:cell differentia…	EC:1.2.1.27; EC:1.2.1.3; EC:1.2.1.18	Methylmalonate-semialdehyde dehydrogenase (CoA acylating); Aldehyde dehydrogenase (NAD(+)); Malonate-semialdehyde dehydrogenase (acetylating)	IPR015590 (PFAM); IPR010061 (TIGRFAM); IPR016162 (G3DSA:3.40.605.GENE3D); IPR016163 (G3DSA:3.40.309.GENE3D); PTHR43866:SF3 (PANTHER); IPR010061 (PANTHER); IPR016160 (PROSITE_PATTERNS); IPR010061 (CDD); IPR016161 (SUPERFAMILY)	F:GO:0004491; P:GO:0008152; F:GO:0016491; F:GO:0016620; P:GO:0055114	F:methylmalonate-semialdehyde dehydrogenase (acylating) activity; P:metabolic process; F:oxidoreductase activity; F:oxidoreductase activity, acting on the aldehyde or oxo group of donors, NAD or NADP as acceptor; P:oxidation-reduction process
TRUE	[INTERPRO, BLASTED, MAPPED, GO-SLIM]	DERPT_G3686	: Full=Alpha-aminoadipic semialdehyde dehydrogenase Short=Alpha-AASA dehydrogenase ame: Full=Aldehyde dehydrogenase family 7 member A1 ame: Full=Antiquitin-1 ame: Full=Betaine aldehyde dehydrogenase ame: Full=Delta1-piperideine-6-carboxylate dehydrogenase Short=P6c dehydrogenase Flags: Precursor	515	20	0	64.04	16	C:GO:0005576; C:GO:0005634; C:GO:0005739; C:GO:0005829; P:GO:0006520; P:GO:0006629; P:GO:0006950; P:GO:0009056; P:GO:0009056; P:GO:0009058; P:GO:0009058; C:GO:0009536; P:GO:0009790; F:GO:0016491; P:GO:0034641; F:GO:0043167	C:extracellular region; C:nucleus; C:mitochondrion; C:cytosol; P:cellular amino acid metabolic process; P:lipid metabolic process; P:response to stress; P:catabolic process; P:catabolic process; P:biosynthetic process; P:biosynthetic process; C:plastid; P:embryo development; F:oxidoreductase activity; P:cellular nitrogen compound metabolic process; F:ion binding	EC:1.2.1.31; EC:1.2.1.8; EC:1.2.1.3	L-aminoadipate-semialdehyde dehydrogenase; Betaine-aldehyde dehydrogenase; Aldehyde dehydrogenase (NAD(+))	IPR016163 (G3DSA:3.40.309.GENE3D); IPR016162 (G3DSA:3.40.605.GENE3D); IPR015590 (PFAM); PTHR43521 (PANTHER); PTHR43521:SF1 (PANTHER); IPR029510 (PROSITE_PATTERNS); cd07130 (CDD); IPR016161 (SUPERFAMILY)	P:GO:0008152; F:GO:0016491; F:GO:0016620; P:GO:0055114	P:metabolic process; F:oxidoreductase activity; F:oxidoreductase activity, acting on the aldehyde or oxo group of donors, NAD or NADP as acceptor; P:oxidation-reduction process
TRUE	[INTERPRO, BLASTED, MAPPED, GO-SLIM]	DERPT_G9323	: Full=Dehydrogenase reductase SDR family member 4 ame: Full=NADPH-dependent carbonyl reductase NADP-retinol dehydrogenase Short=CR Short=PHCR ame: Full=NADPH-dependent retinol dehydrogenase reductase Short=NDRD ame: Full=Peroxisomal short-chain alcohol dehydrogenase Short=PSCD	431	20	1.052e-76	66.18	30	C:GO:0005576; C:GO:0005635; C:GO:0005654; C:GO:0005730; C:GO:0005739; C:GO:0005777; C:GO:0005783; C:GO:0005829; P:GO:0005975; P:GO:0005975; P:GO:0006091; P:GO:0006457; P:GO:0006629; P:GO:0007010; P:GO:0007165; P:GO:0009056; P:GO:0009056; P:GO:0009058; P:GO:0009058; F:GO:0016491; P:GO:0021700; P:GO:0030154; C:GO:0032991; P:GO:0034641; P:GO:0040007; P:GO:0044281; P:GO:0048856; F:GO:0051082; P:GO:00…	C:extracellular region; C:nuclear envelope; C:nucleoplasm; C:nucleolus; C:mitochondrion; C:peroxisome; C:endoplasmic reticulum; C:cytosol; P:carbohydrate metabolic process; P:carbohydrate metabolic process; P:generation of precursor metabolites and energy; P:protein folding; P:lipid metabolic process; P:cytoskeleton organization; P:signal transduction; P:catabolic process; P:catabolic process; P:…	EC:1.2.1.36; EC:1.1.1.300; EC:1.1.1.184; EC:1.1.1.2; EC:1.1.1.71; EC:1.1.1.270	Retinal dehydrogenase; NADP-retinol dehydrogenase; Carbonyl reductase (NADPH); Alcohol dehydrogenase (NADP(+)); Alcohol dehydrogenase (NAD(P)(+)); 3-beta-hydroxysteroid 3-dehydrogenase	Coil (COILS); Coil (COILS); IPR002347 (PRINTS); IPR009053 (G3DSA:1.10.287.GENE3D); G3DSA:3.40.50.720 (GENE3D); IPR002777 (PFAM); PF13561 (PFAM); mobidb-lite (MOBIDB_LITE); PTHR43943 (PANTHER); PTHR43943:SF2 (PANTHER); SSF46579 (SUPERFAMILY); IPR036291 (SUPERFAMILY)	P:GO:0006457; C:GO:0016272; F:GO:0051082	P:protein folding; C:prefoldin complex; F:unfolded protein binding
TRUE	[INTERPRO, BLASTED, MAPPED, MANUAL, GO-SLIM]	DERPT_G5156	Der f aldehyde dehydrogenase like allergen; Allergen homolog (Tyr p 35, Cla h3): Full=Retinal dehydrogenase 2 Short=RALDH 2 Short= 2 ame: Full=Aldehyde dehydrogenase family 1 member A2 ame: Full=Retinaldehyde-specific dehydrogenase type 2 Short=RALDH(II)	490	20	0	75.59	45	P:GO:0001568; F:GO:0001758; P:GO:0001936; P:GO:0001947; F:GO:0004028; C:GO:0005654; C:GO:0005739; C:GO:0005829; P:GO:0008284; P:GO:0008285; P:GO:0009952; P:GO:0009954; P:GO:0010628; P:GO:0014032; P:GO:0016331; F:GO:0016918; F:GO:0018479; P:GO:0018874; P:GO:0021915; P:GO:0030182; P:GO:0030324; P:GO:0030900; P:GO:0030902; P:GO:0031016; P:GO:0031076; P:GO:0034097; P:GO:0035115; P:GO:0035799; P:GO:00…	P:blood vessel development; F:retinal dehydrogenase activity; P:regulation of endothelial cell proliferation; P:heart looping; F:3-chloroallyl aldehyde dehydrogenase activity; C:nucleoplasm; C:mitochondrion; C:cytosol; P:positive regulation of cell proliferation; P:negative regulation of cell proliferation; P:anterior/posterior pattern specification; P:proximal/distal pattern formation; P:positiv…	EC:1.2.1.36; EC:1.2.1.3; EC:1.2.1.28	Retinal dehydrogenase; Aldehyde dehydrogenase (NAD(+)); Benzaldehyde dehydrogenase (NAD(+))	IPR016163 (G3DSA:3.40.309.GENE3D); IPR015590 (PFAM); IPR016162 (G3DSA:3.40.605.GENE3D); PTHR11699:SF265 (PANTHER); PTHR11699 (PANTHER); IPR029510 (PROSITE_PATTERNS); IPR016160 (PROSITE_PATTERNS); cd07141 (CDD); IPR016161 (SUPERFAMILY)	P:GO:0008152; F:GO:0016491; F:GO:0016620; P:GO:0055114	P:metabolic process; F:oxidoreductase activity; F:oxidoreductase activity, acting on the aldehyde or oxo group of donors, NAD or NADP as acceptor; P:oxidation-reduction process
TRUE	[INTERPRO, BLASTED, MAPPED, GO-SLIM]	DERPT_G1595	: Full=Retinal dehydrogenase 2 Short=RALDH 2 Short= 2 ame: Full=Aldehyde dehydrogenase family 1 member A2 ame: Full=Retinaldehyde-specific dehydrogenase type 2 Short=RALDH(II)	507	20	1.0801e-157	65	23	C:GO:0005739; P:GO:0005975; P:GO:0005975; P:GO:0006091; P:GO:0006520; P:GO:0006629; P:GO:0007165; P:GO:0008219; P:GO:0008283; P:GO:0009056; P:GO:0009056; P:GO:0009058; P:GO:0009058; P:GO:0009790; F:GO:0016491; P:GO:0019748; P:GO:0021700; P:GO:0030154; P:GO:0034641; F:GO:0043167; P:GO:0048646; P:GO:0050877; P:GO:0051186	C:mitochondrion; P:carbohydrate metabolic process; P:carbohydrate metabolic process; P:generation of precursor metabolites and energy; P:cellular amino acid metabolic process; P:lipid metabolic process; P:signal transduction; P:cell death; P:cell proliferation; P:catabolic process; P:catabolic process; P:biosynthetic process; P:biosynthetic process; P:embryo development; F:oxidoreductase activity…	EC:1.2.1.36; EC:1.2.1.68; EC:1.2.1.5; EC:1.2.1.3	Retinal dehydrogenase; Coniferyl-aldehyde dehydrogenase; Aldehyde dehydrogenase (NAD(P)(+)); Aldehyde dehydrogenase (NAD(+))	IPR015590 (PFAM); IPR016163 (G3DSA:3.40.309.GENE3D); IPR016162 (G3DSA:3.40.605.GENE3D); PTHR11699:SF211 (PANTHER); PTHR11699 (PANTHER); IPR029510 (PROSITE_PATTERNS); IPR016160 (PROSITE_PATTERNS); IPR016161 (SUPERFAMILY)	P:GO:0008152; F:GO:0016491; F:GO:0016620; P:GO:0055114	P:metabolic process; F:oxidoreductase activity; F:oxidoreductase activity, acting on the aldehyde or oxo group of donors, NAD or NADP as acceptor; P:oxidation-reduction process
TRUE	[INTERPRO, BLASTED, MAPPED, MANUAL, GO-SLIM]	DERPT_G10061	Proposed Mon-Allergen, Allergen homolog (Bea b Ald, Typ 35, Cla h 10, ALTA10) : Full=Retinal dehydrogenase 2 Short=RALDH 2 Short= 2 ame: Full=Aldehyde dehydrogenase family 1 member A2 ame: Full=Retinaldehyde-specific dehydrogenase type 2 Short=RALDH(II)	1298	20	0	74.69	54	C:GO:0000123; P:GO:0001568; F:GO:0001758; P:GO:0001936; P:GO:0001947; P:GO:0002072; F:GO:0003700; F:GO:0004028; F:GO:0004402; C:GO:0005667; C:GO:0005739; C:GO:0005829; P:GO:0006355; P:GO:0006979; F:GO:0008270; P:GO:0008284; P:GO:0008285; P:GO:0009952; P:GO:0009954; P:GO:0010628; P:GO:0014032; P:GO:0016573; F:GO:0016918; F:GO:0018479; P:GO:0018874; P:GO:0021915; P:GO:0030182; P:GO:0030324; P:GO:00…	C:histone acetyltransferase complex; P:blood vessel development; F:retinal dehydrogenase activity; P:regulation of endothelial cell proliferation; P:heart looping; P:optic cup morphogenesis involved in camera-type eye development; F:DNA-binding transcription factor activity; F:3-chloroallyl aldehyde dehydrogenase activity; F:histone acetyltransferase activity; C:transcription factor complex; C:mi…	EC:1.2.1.36; EC:2.3.1.48; EC:1.2.1.3; EC:1.2.1.28	Retinal dehydrogenase; Histone acetyltransferase; Aldehyde dehydrogenase (NAD(+)); Benzaldehyde dehydrogenase (NAD(+))	Coil (COILS); IPR001965 (SMART); G3DSA:3.30.60.60 (GENE3D); G3DSA:3.40.630.30 (GENE3D); IPR002717 (PFAM); IPR015590 (PFAM); IPR013083 (G3DSA:3.30.40.GENE3D); IPR036388 (G3DSA:1.10.10.GENE3D); IPR016163 (G3DSA:3.40.309.GENE3D); IPR002515 (PFAM); IPR016162 (G3DSA:3.40.605.GENE3D); mobidb-lite (MOBIDB_LITE); mobidb-lite (MOBIDB_LITE); mobidb-lite (MOBIDB_LITE); PTHR11699 (PANTHER); PTHR11699:SF269 (…	F:GO:0003700; F:GO:0004402; C:GO:0005634; P:GO:0006355; P:GO:0008152; F:GO:0008270; F:GO:0016491; P:GO:0016573; F:GO:0016620; P:GO:0055114	F:DNA-binding transcription factor activity; F:histone acetyltransferase activity; C:nucleus; P:regulation of transcription, DNA-templated; P:metabolic process; F:zinc ion binding; F:oxidoreductase activity; P:histone acetylation; F:oxidoreductase activity, acting on the aldehyde or oxo group of donors, NAD or NADP as acceptor; P:oxidation-reduction process
TRUE	[INTERPRO, BLASTED, MAPPED, GO-SLIM]	DERPT_G3451	: Full=Angiotensin-converting enzyme Short=ACE ame: Full=Dipeptidyl carboxypeptidase I ame: Full=Kininase II ame: CD_antigen=CD143 Contains: ame: Full=Angiotensin-converting soluble form Flags: Precursor	1071	20	9.93513e-159	60.72	36	P:GO:0000003; P:GO:0002376; P:GO:0003013; C:GO:0005615; C:GO:0005737; C:GO:0005886; C:GO:0005929; P:GO:0005975; P:GO:0005975; P:GO:0006091; P:GO:0006464; P:GO:0006520; P:GO:0006629; P:GO:0006810; P:GO:0006810; P:GO:0006950; P:GO:0007568; P:GO:0008219; F:GO:0008233; P:GO:0008283; P:GO:0009056; P:GO:0009056; P:GO:0009058; P:GO:0009058; F:GO:0016491; P:GO:0022607; P:GO:0030154; P:GO:0034330; P:GO:00…	P:reproduction; P:immune system process; P:circulatory system process; C:extracellular space; C:cytoplasm; C:plasma membrane; C:cilium; P:carbohydrate metabolic process; P:carbohydrate metabolic process; P:generation of precursor metabolites and energy; P:cellular protein modification process; P:cellular amino acid metabolic process; P:lipid metabolic process; P:transport; P:transport; P:response…	EC:1.2.1.36; EC:3.4.15; EC:1.2.1.3	Retinal dehydrogenase; Acting on peptide bonds (peptidases); Aldehyde dehydrogenase (NAD(+))	Coil (COILS); Coil (COILS); IPR001548 (PRINTS); IPR016163 (G3DSA:3.40.309.GENE3D); IPR015590 (PFAM); IPR016162 (G3DSA:3.40.605.GENE3D); IPR001548 (PFAM); IPR001548 (PANTHER); PTHR10514:SF35 (PANTHER); IPR029510 (PROSITE_PATTERNS); IPR016160 (PROSITE_PATTERNS); SIGNAL_PEPTIDE_H_REGION (PHOBIUS); NON_CYTOPLASMIC_DOMAIN (PHOBIUS); SIGNAL_PEPTIDE_C_REGION (PHOBIUS); SIGNAL_PEPTIDE (PHOBIUS); SIGNAL_P…	P:GO:0006508; P:GO:0008152; F:GO:0008237; F:GO:0008241; C:GO:0016020; F:GO:0016491; F:GO:0016620; P:GO:0055114	P:proteolysis; P:metabolic process; F:metallopeptidase activity; F:peptidyl-dipeptidase activity; C:membrane; F:oxidoreductase activity; F:oxidoreductase activity, acting on the aldehyde or oxo group of donors, NAD or NADP as acceptor; P:oxidation-reduction process
TRUE	[INTERPRO, BLASTED, MAPPED, GO-SLIM]	DERPT_G6640	: Full=Gamma-glutamyl phosphate reductase Short=GPR ame: Full=Glutamate-5-semialdehyde dehydrogenase ame: Full=Glutamyl-gamma-semialdehyde dehydrogenase Short=GSA dehydrogenase	831	20	0	65.67	11	P:GO:0000003; C:GO:0005739; C:GO:0005829; P:GO:0006520; P:GO:0006950; P:GO:0009058; P:GO:0009058; C:GO:0009536; P:GO:0009790; F:GO:0016301; F:GO:0016491	P:reproduction; C:mitochondrion; C:cytosol; P:cellular amino acid metabolic process; P:response to stress; P:biosynthetic process; P:biosynthetic process; C:plastid; P:embryo development; F:kinase activity; F:oxidoreductase activity	EC:1.2.1.41; EC:2.7.2.11	Glutamate-5-semialdehyde dehydrogenase; Glutamate 5-kinase	IPR001057 (PRINTS); IPR016162 (G3DSA:3.40.605.GENE3D); IPR000965 (TIGRFAM); IPR005766 (PIRSF); IPR001048 (PFAM); IPR005766 (TIGRFAM); IPR016163 (G3DSA:3.40.309.GENE3D); IPR015590 (PFAM); IPR036393 (G3DSA:3.40.1160.GENE3D); IPR005715 (TIGRFAM); mobidb-lite (MOBIDB_LITE); PTHR11063 (PANTHER); PTHR11063:SF16 (PANTHER); IPR019797 (PROSITE_PATTERNS); IPR020593 (PROSITE_PATTERNS); IPR000965 (HAMAP); IP…	F:GO:0003824; F:GO:0004349; F:GO:0004350; C:GO:0005737; P:GO:0006561; P:GO:0008152; F:GO:0016491; F:GO:0016620; P:GO:0055114	F:catalytic activity; F:glutamate 5-kinase activity; F:glutamate-5-semialdehyde dehydrogenase activity; C:cytoplasm; P:proline biosynthetic process; P:metabolic process; F:oxidoreductase activity; F:oxidoreductase activity, acting on the aldehyde or oxo group of donors, NAD or NADP as acceptor; P:oxidation-reduction process
TRUE	[INTERPRO, BLASTED, MAPPED, GO-SLIM]	DERPT_G3798	: Full=Alcohol dehydrogenase class-3 ame: Full=Alcohol dehydrogenase class-III ame: Full=Glutathione-dependent formaldehyde dehydrogenase Short=FALDH Short=FDH Short=GSH-FDH ame: Full=S-(hydroxymethyl)glutathione dehydrogenase	382	20	0	81.88	19	P:GO:0000003; P:GO:0003013; C:GO:0005576; C:GO:0005634; C:GO:0005739; C:GO:0005777; C:GO:0005829; P:GO:0006464; P:GO:0006629; P:GO:0006950; P:GO:0008219; F:GO:0008289; P:GO:0009056; P:GO:0009056; F:GO:0016491; F:GO:0043167; P:GO:0044281; P:GO:0048856; P:GO:0050877	P:reproduction; P:circulatory system process; C:extracellular region; C:nucleus; C:mitochondrion; C:peroxisome; C:cytosol; P:cellular protein modification process; P:lipid metabolic process; P:response to stress; P:cell death; F:lipid binding; P:catabolic process; P:catabolic process; F:oxidoreductase activity; F:ion binding; P:small molecule metabolic process; P:anatomical structure development;…	EC:1.2.1.46; EC:1.1.1.284; EC:1.1.1.73; EC:1.2.1.3; EC:1.1.1.1	Formaldehyde dehydrogenase; S-(hydroxymethyl)glutathione dehydrogenase; Octanol dehydrogenase; Aldehyde dehydrogenase (NAD(+)); Alcohol dehydrogenase	G3DSA:3.40.50.720 (GENE3D); IPR013149 (PFAM); IPR013154 (PFAM); IPR014183 (TIGRFAM); G3DSA:3.90.180.10 (GENE3D); PTHR43880 (PANTHER); PTHR43880:SF13 (PANTHER); IPR002328 (PROSITE_PATTERNS); IPR014183 (CDD); IPR036291 (SUPERFAMILY); IPR011032 (SUPERFAMILY); IPR011032 (SUPERFAMILY)	P:GO:0006069; F:GO:0008270; F:GO:0016491; F:GO:0051903; P:GO:0055114	P:ethanol oxidation; F:zinc ion binding; F:oxidoreductase activity; F:S-(hydroxymethyl)glutathione dehydrogenase activity; P:oxidation-reduction process
TRUE	[INTERPRO, BLASTED, MAPPED, GO-SLIM]	DERPT_G11608	: Full=Cytosolic 10-formyltetrahydrofolate dehydrogenase Short=10-FTHFDH Short=FDH ame: Full=Aldehyde dehydrogenase family 1 member L1	914	20	0	71.06	24	C:GO:0005576; C:GO:0005739; P:GO:0005975; P:GO:0005975; P:GO:0006091; P:GO:0006520; P:GO:0006629; P:GO:0007165; P:GO:0008219; P:GO:0008283; P:GO:0009056; P:GO:0009056; P:GO:0009058; P:GO:0009058; P:GO:0009790; F:GO:0016491; P:GO:0021700; P:GO:0030154; C:GO:0032991; P:GO:0034641; F:GO:0043167; P:GO:0048646; P:GO:0050877; P:GO:0051186	C:extracellular region; C:mitochondrion; P:carbohydrate metabolic process; P:carbohydrate metabolic process; P:generation of precursor metabolites and energy; P:cellular amino acid metabolic process; P:lipid metabolic process; P:signal transduction; P:cell death; P:cell proliferation; P:catabolic process; P:catabolic process; P:biosynthetic process; P:biosynthetic process; P:embryo development; F…	EC:1.2.1.47; EC:1.2.1.36; EC:1.2.1.5; EC:1.2.1.19; EC:1.2.1.4; EC:1.2.1.3; EC:1.5.1.6	4-trimethylammoniobutyraldehyde dehydrogenase; Retinal dehydrogenase; Aldehyde dehydrogenase (NAD(P)(+)); Aminobutyraldehyde dehydrogenase; Aldehyde dehydrogenase (NADP(+)); Aldehyde dehydrogenase (NAD(+)); Formyltetrahydrofolate dehydrogenase	IPR011407 (PIRSF); IPR016162 (G3DSA:3.40.605.GENE3D); IPR016163 (G3DSA:3.40.309.GENE3D); G3DSA:3.40.50.170 (GENE3D); IPR036736 (G3DSA:1.10.1200.GENE3D); IPR015590 (PFAM); IPR002376 (PFAM); IPR037022 (G3DSA:3.10.25.GENE3D); IPR005793 (PFAM); PTHR11699:SF190 (PANTHER); PTHR11699 (PANTHER); IPR029510 (PROSITE_PATTERNS); IPR016160 (PROSITE_PATTERNS); SIGNAL_PEPTIDE_H_REGION (PHOBIUS); SIGNAL_PEPTIDE_…	F:GO:0003824; C:GO:0005737; P:GO:0006730; P:GO:0008152; P:GO:0009058; P:GO:0009258; F:GO:0016155; F:GO:0016491; F:GO:0016620; F:GO:0016742; P:GO:0055114	F:catalytic activity; C:cytoplasm; P:one-carbon metabolic process; P:metabolic process; P:biosynthetic process; P:10-formyltetrahydrofolate catabolic process; F:formyltetrahydrofolate dehydrogenase activity; F:oxidoreductase activity; F:oxidoreductase activity, acting on the aldehyde or oxo group of donors, NAD or NADP as acceptor; F:hydroxymethyl-, formyl- and related transferase activity; P:oxi…
TRUE	[INTERPRO, BLASTED, MAPPED, GO-SLIM]	DERPT_G7119	: Full=Aldehyde dehydrogenase family 3 member B1 Flags: Precursor	511	20	1.90474e-157	66.71	25	C:GO:0005576; C:GO:0005634; C:GO:0005739; C:GO:0005773; C:GO:0005777; C:GO:0005783; C:GO:0005794; C:GO:0005811; C:GO:0005829; C:GO:0005886; P:GO:0005975; P:GO:0005975; P:GO:0006091; P:GO:0006520; P:GO:0006629; P:GO:0006950; P:GO:0009056; P:GO:0009056; P:GO:0009058; P:GO:0009058; C:GO:0009536; F:GO:0016491; P:GO:0034641; P:GO:0048856; P:GO:0051186	C:extracellular region; C:nucleus; C:mitochondrion; C:vacuole; C:peroxisome; C:endoplasmic reticulum; C:Golgi apparatus; C:lipid droplet; C:cytosol; C:plasma membrane; P:carbohydrate metabolic process; P:carbohydrate metabolic process; P:generation of precursor metabolites and energy; P:cellular amino acid metabolic process; P:lipid metabolic process; P:response to stress; P:catabolic process; P:…	EC:1.2.1.48; EC:1.1.3.20; EC:1.2.1.5; EC:1.2.1.4; EC:1.2.1.3	Long-chain-aldehyde dehydrogenase; Long-chain-alcohol oxidase; Aldehyde dehydrogenase (NAD(P)(+)); Aldehyde dehydrogenase (NADP(+)); Aldehyde dehydrogenase (NAD(+))	Coil (COILS); IPR016162 (G3DSA:3.40.605.GENE3D); IPR015590 (PFAM); IPR016163 (G3DSA:3.40.309.GENE3D); IPR012394 (PIRSF); PTHR43570 (PANTHER); PTHR43570:SF16 (PANTHER); IPR029510 (PROSITE_PATTERNS); NON_CYTOPLASMIC_DOMAIN (PHOBIUS); CYTOPLASMIC_DOMAIN (PHOBIUS); TRANSMEMBRANE (PHOBIUS); IPR016161 (SUPERFAMILY); TMhelix (TMHMM)	P:GO:0006081; P:GO:0008152; F:GO:0016491; F:GO:0016620; P:GO:0055114	P:cellular aldehyde metabolic process; P:metabolic process; F:oxidoreductase activity; F:oxidoreductase activity, acting on the aldehyde or oxo group of donors, NAD or NADP as acceptor; P:oxidation-reduction process
TRUE	[INTERPRO, BLASTED, MAPPED, GO-SLIM]	DERPT_G5553	: Full=Fatty acyl- reductase 1	821	20	7.27999e-91	53.84	16	C:GO:0005777; P:GO:0005975; P:GO:0005975; P:GO:0006091; P:GO:0006520; P:GO:0006629; P:GO:0006950; P:GO:0009056; P:GO:0009056; P:GO:0009058; P:GO:0009058; F:GO:0016491; P:GO:0019748; P:GO:0034641; P:GO:0048856; P:GO:0051186	C:peroxisome; P:carbohydrate metabolic process; P:carbohydrate metabolic process; P:generation of precursor metabolites and energy; P:cellular amino acid metabolic process; P:lipid metabolic process; P:response to stress; P:catabolic process; P:catabolic process; P:biosynthetic process; P:biosynthetic process; F:oxidoreductase activity; P:secondary metabolic process; P:cellular nitrogen compound …	EC:1.2.1.50; EC:1.2.1.3	Long-chain-fatty-acyl-CoA reductase; Aldehyde dehydrogenase (NAD(+))	IPR033640 (PFAM); G3DSA:3.40.50.720 (GENE3D); IPR013120 (PFAM); IPR026055 (PANTHER); PTHR11011:SF43 (PANTHER); IPR026055 (PANTHER); PTHR11011:SF43 (PANTHER); CYTOPLASMIC_DOMAIN (PHOBIUS); TRANSMEMBRANE (PHOBIUS); CYTOPLASMIC_DOMAIN (PHOBIUS); TRANSMEMBRANE (PHOBIUS); TRANSMEMBRANE (PHOBIUS); NON_CYTOPLASMIC_DOMAIN (PHOBIUS); NON_CYTOPLASMIC_DOMAIN (PHOBIUS); IPR033640 (CDD); cd05236 (CDD); IPR033…	F:GO:0080019	F:fatty-acyl-CoA reductase (alcohol-forming) activity
TRUE	[INTERPRO, BLASTED, MAPPED, MANUAL, GO-SLIM]	DERPT_G3392	Allergen homolog (Tri a34, Asp vGAPDH): Full=Glyceraldehyde-3-phosphate dehydrogenase Short=GAPDH ame: Full=Peptidyl-cysteine S-nitrosylase GAPDH	332	20	0	84.85	34	P:GO:0000226; F:GO:0004365; C:GO:0005739; C:GO:0005811; C:GO:0005829; C:GO:0005875; C:GO:0005886; P:GO:0006094; P:GO:0006096; P:GO:0007275; P:GO:0007520; P:GO:0007525; F:GO:0008017; P:GO:0017148; F:GO:0019899; C:GO:0030018; C:GO:0031012; C:GO:0031430; C:GO:0031965; F:GO:0035605; P:GO:0035606; F:GO:0042802; C:GO:0043209; C:GO:0045298; F:GO:0050661; P:GO:0050821; F:GO:0051287; P:GO:0051402; P:GO:00…	P:microtubule cytoskeleton organization; F:glyceraldehyde-3-phosphate dehydrogenase (NAD+) (phosphorylating) activity; C:mitochondrion; C:lipid droplet; C:cytosol; C:microtubule associated complex; C:plasma membrane; P:gluconeogenesis; P:glycolytic process; P:multicellular organism development; P:myoblast fusion; P:somatic muscle development; F:microtubule binding; P:negative regulation of transl…	EC:1.2.1.59; EC:1.2.1.12	Glyceraldehyde-3-phosphate dehydrogenase (NAD(P)(+)) (phosphorylating); Glyceraldehyde-3-phosphate dehydrogenase (phosphorylating)	IPR020831 (PRINTS); IPR020828 (SMART); IPR020828 (PFAM); IPR020829 (PFAM); G3DSA:3.30.360.10 (GENE3D); IPR020831 (PIRSF); G3DSA:3.40.50.720 (GENE3D); IPR006424 (TIGRFAM); PTHR10836:SF79 (PANTHER); IPR020831 (PANTHER); IPR020830 (PROSITE_PATTERNS); SSF55347 (SUPERFAMILY); IPR036291 (SUPERFAMILY)	P:GO:0006006; F:GO:0016620; F:GO:0050661; F:GO:0051287; P:GO:0055114	P:glucose metabolic process; F:oxidoreductase activity, acting on the aldehyde or oxo group of donors, NAD or NADP as acceptor; F:NADP binding; F:NAD binding; P:oxidation-reduction process
TRUE	[INTERPRO, BLASTED, MAPPED, MANUAL, GO-SLIM]	DERPT_G1818	Allergen homolog (Tri a34, Asp v GAPDH): Full=Glyceraldehyde-3-phosphate dehydrogenase Short=GAPDH	928	20	5.36654e-35	85.75	17	F:GO:0001968; F:GO:0004365; C:GO:0005829; C:GO:0005886; P:GO:0006094; P:GO:0006096; P:GO:0007160; C:GO:0009986; C:GO:0030445; C:GO:0030446; F:GO:0043236; P:GO:0044406; P:GO:0044416; F:GO:0050661; F:GO:0051287; P:GO:0055114; C:GO:0097311	F:fibronectin binding; F:glyceraldehyde-3-phosphate dehydrogenase (NAD+) (phosphorylating) activity; C:cytosol; C:plasma membrane; P:gluconeogenesis; P:glycolytic process; P:cell-matrix adhesion; C:cell surface; C:yeast-form cell wall; C:hyphal cell wall; F:laminin binding; P:adhesion of symbiont to host; P:induction by symbiont of host defense response; F:NADP binding; F:NAD binding; P:oxidation…	EC:1.2.1.59; EC:1.2.1.12	Glyceraldehyde-3-phosphate dehydrogenase (NAD(P)(+)) (phosphorylating); Glyceraldehyde-3-phosphate dehydrogenase (phosphorylating)	G3DSA:3.30.360.10 (GENE3D); IPR020829 (PFAM); mobidb-lite (MOBIDB_LITE); mobidb-lite (MOBIDB_LITE); mobidb-lite (MOBIDB_LITE); PTHR10836:SF52 (PANTHER); IPR020831 (PANTHER); SSF55347 (SUPERFAMILY)	F:GO:0016620; P:GO:0055114	F:oxidoreductase activity, acting on the aldehyde or oxo group of donors, NAD or NADP as acceptor; P:oxidation-reduction process
TRUE	[INTERPRO, BLASTED, MAPPED, GO-SLIM]	DERPT_G7879	: Full=Pyruvate dehydrogenase E1 component subunit mitochondrial Short=PDHE1-B Flags: Precursor	373	20	0	81.37	22	C:GO:0005576; C:GO:0005654; C:GO:0005730; C:GO:0005739; C:GO:0005773; C:GO:0005794; C:GO:0005829; P:GO:0005975; P:GO:0005975; P:GO:0006091; P:GO:0006520; P:GO:0006790; P:GO:0006950; P:GO:0007568; P:GO:0009056; P:GO:0009056; P:GO:0009058; P:GO:0009058; P:GO:0009790; F:GO:0016491; P:GO:0034641; P:GO:0051186	C:extracellular region; C:nucleoplasm; C:nucleolus; C:mitochondrion; C:vacuole; C:Golgi apparatus; C:cytosol; P:carbohydrate metabolic process; P:carbohydrate metabolic process; P:generation of precursor metabolites and energy; P:cellular amino acid metabolic process; P:sulfur compound metabolic process; P:response to stress; P:aging; P:catabolic process; P:catabolic process; P:biosynthetic proce…	EC:1.2.4.1	Pyruvate dehydrogenase (acetyl-transferring)	IPR005475 (SMART); G3DSA:3.40.50.970 (GENE3D); IPR033248 (PFAM); IPR005475 (PFAM); IPR009014 (G3DSA:3.40.50.GENE3D); IPR027110 (PTHR11624:PANTHER); PTHR11624 (PANTHER); cd07036 (CDD); SignalP-TM (SIGNALP_GRAM_POSITIVE); IPR029061 (SUPERFAMILY); IPR009014 (SUPERFAMILY)	F:GO:0003824; F:GO:0004739; P:GO:0006086; P:GO:0008152	F:catalytic activity; F:pyruvate dehydrogenase (acetyl-transferring) activity; P:acetyl-CoA biosynthetic process from pyruvate; P:metabolic process
TRUE	[INTERPRO, BLASTED, MAPPED, GO-SLIM]	DERPT_G5313	: Full=Pyruvate dehydrogenase E1 component subunit somatic mitochondrial ame: Full=PDHE1-A type I Flags: Precursor	397	20	1.38252e-169	72.08	19	P:GO:0000003; C:GO:0005634; C:GO:0005739; C:GO:0005829; P:GO:0005975; P:GO:0005975; P:GO:0006091; P:GO:0006520; P:GO:0006790; P:GO:0006950; P:GO:0009056; P:GO:0009056; P:GO:0009058; P:GO:0009058; F:GO:0016491; P:GO:0034641; F:GO:0043167; P:GO:0048856; P:GO:0051186	P:reproduction; C:nucleus; C:mitochondrion; C:cytosol; P:carbohydrate metabolic process; P:carbohydrate metabolic process; P:generation of precursor metabolites and energy; P:cellular amino acid metabolic process; P:sulfur compound metabolic process; P:response to stress; P:catabolic process; P:catabolic process; P:biosynthetic process; P:biosynthetic process; F:oxidoreductase activity; P:cellula…	EC:1.2.4.1	Pyruvate dehydrogenase (acetyl-transferring)	G3DSA:3.40.50.970 (GENE3D); IPR001017 (PFAM); IPR017597 (TIGRFAM); PTHR11516 (PANTHER); PTHR11516:SF24 (PANTHER); cd02000 (CDD); IPR029061 (SUPERFAMILY)	F:GO:0004739; P:GO:0006086; P:GO:0008152; F:GO:0016624; C:GO:0043231	F:pyruvate dehydrogenase (acetyl-transferring) activity; P:acetyl-CoA biosynthetic process from pyruvate; P:metabolic process; F:oxidoreductase activity, acting on the aldehyde or oxo group of donors, disulfide as acceptor; C:intracellular membrane-bounded organelle
TRUE	[INTERPRO, BLASTED, MAPPED, GO-SLIM]	DERPT_G3615	: Full=Pyruvate dehydrogenase E1 component subunit somatic mitochondrial ame: Full=PDHE1-A type I Flags: Precursor	390	20	6.17218e-156	70.84	17	P:GO:0000003; C:GO:0005634; C:GO:0005739; C:GO:0005829; P:GO:0005975; P:GO:0005975; P:GO:0006091; P:GO:0006520; P:GO:0006790; P:GO:0009056; P:GO:0009056; P:GO:0009058; P:GO:0009058; F:GO:0016491; P:GO:0034641; P:GO:0048856; P:GO:0051186	P:reproduction; C:nucleus; C:mitochondrion; C:cytosol; P:carbohydrate metabolic process; P:carbohydrate metabolic process; P:generation of precursor metabolites and energy; P:cellular amino acid metabolic process; P:sulfur compound metabolic process; P:catabolic process; P:catabolic process; P:biosynthetic process; P:biosynthetic process; F:oxidoreductase activity; P:cellular nitrogen compound me…	EC:1.2.4.1	Pyruvate dehydrogenase (acetyl-transferring)	IPR017597 (TIGRFAM); IPR001017 (PFAM); G3DSA:3.40.50.970 (GENE3D); PTHR11516:SF24 (PANTHER); PTHR11516 (PANTHER); cd02000 (CDD); IPR029061 (SUPERFAMILY)	F:GO:0004739; P:GO:0006086; P:GO:0008152; F:GO:0016624; C:GO:0043231	F:pyruvate dehydrogenase (acetyl-transferring) activity; P:acetyl-CoA biosynthetic process from pyruvate; P:metabolic process; F:oxidoreductase activity, acting on the aldehyde or oxo group of donors, disulfide as acceptor; C:intracellular membrane-bounded organelle
TRUE	[INTERPRO, BLASTED, MAPPED, GO-SLIM]	DERPT_G12474	: Full=Pyruvate dehydrogenase E1 component subunit mitochondrial Short=PDHE1-B Flags: Precursor	48	20	1.17294e-15	78.3	22	C:GO:0005576; C:GO:0005654; C:GO:0005730; C:GO:0005739; C:GO:0005773; C:GO:0005794; C:GO:0005829; P:GO:0005975; P:GO:0005975; P:GO:0006091; P:GO:0006520; P:GO:0006790; P:GO:0006950; P:GO:0007568; P:GO:0009056; P:GO:0009056; P:GO:0009058; P:GO:0009058; P:GO:0009790; F:GO:0016491; P:GO:0034641; P:GO:0051186	C:extracellular region; C:nucleoplasm; C:nucleolus; C:mitochondrion; C:vacuole; C:Golgi apparatus; C:cytosol; P:carbohydrate metabolic process; P:carbohydrate metabolic process; P:generation of precursor metabolites and energy; P:cellular amino acid metabolic process; P:sulfur compound metabolic process; P:response to stress; P:aging; P:catabolic process; P:catabolic process; P:biosynthetic proce…	EC:1.2.4.1	Pyruvate dehydrogenase (acetyl-transferring)	IPR033248 (PFAM); IPR009014 (G3DSA:3.40.50.GENE3D); PTHR11624 (PANTHER); PTHR11624:SF56 (PANTHER); IPR009014 (SUPERFAMILY)	F:GO:0003824; P:GO:0008152	F:catalytic activity; P:metabolic process
TRUE	[INTERPRO, BLASTED, MAPPED, GO-SLIM]	DERPT_G888	: Full=2-oxoglutarate dehydrogenase E1 component ame: Full=Alpha-ketoglutarate dehydrogenase	974	20	0	57.57	12	P:GO:0002376; C:GO:0005739; P:GO:0006091; P:GO:0006520; P:GO:0009056; P:GO:0009056; F:GO:0016491; P:GO:0030154; C:GO:0032991; P:GO:0034641; F:GO:0043167; P:GO:0048856	P:immune system process; C:mitochondrion; P:generation of precursor metabolites and energy; P:cellular amino acid metabolic process; P:catabolic process; P:catabolic process; F:oxidoreductase activity; P:cell differentiation; C:protein-containing complex; P:cellular nitrogen compound metabolic process; F:ion binding; P:anatomical structure development	EC:1.2.4.2	Oxoglutarate dehydrogenase (succinyl-transferring)	IPR005475 (SMART); G3DSA:3.40.50.12470 (GENE3D); G3DSA:3.40.50.11610 (GENE3D); IPR001017 (PFAM); IPR005475 (PFAM); IPR011603 (PIRSF); G3DSA:3.40.50.970 (GENE3D); IPR031717 (PFAM); IPR011603 (PANTHER); PTHR23152:SF21 (PANTHER); IPR029061 (SUPERFAMILY); IPR029061 (SUPERFAMILY)	F:GO:0004591; P:GO:0006099; P:GO:0008152; F:GO:0016624; F:GO:0030976; P:GO:0055114	F:oxoglutarate dehydrogenase (succinyl-transferring) activity; P:tricarboxylic acid cycle; P:metabolic process; F:oxidoreductase activity, acting on the aldehyde or oxo group of donors, disulfide as acceptor; F:thiamine pyrophosphate binding; P:oxidation-reduction process
TRUE	[INTERPRO, BLASTED, MAPPED, GO-SLIM]	DERPT_G11320	: Full=2-oxoglutarate mitochondrial ame: Full=2-oxoglutarate dehydrogenase complex component E1 Short=OGDC-E1 ame: Full=Alpha-ketoglutarate dehydrogenase Flags: Precursor	1113	20	0	68.79	15	C:GO:0005739; C:GO:0005829; P:GO:0006091; P:GO:0006520; P:GO:0006790; P:GO:0009056; P:GO:0009056; F:GO:0016491; P:GO:0030154; C:GO:0032991; P:GO:0034641; F:GO:0043167; P:GO:0048856; P:GO:0048870; P:GO:0051186	C:mitochondrion; C:cytosol; P:generation of precursor metabolites and energy; P:cellular amino acid metabolic process; P:sulfur compound metabolic process; P:catabolic process; P:catabolic process; F:oxidoreductase activity; P:cell differentiation; C:protein-containing complex; P:cellular nitrogen compound metabolic process; F:ion binding; P:anatomical structure development; P:cell motility; P:co…	EC:1.2.4.2	Oxoglutarate dehydrogenase (succinyl-transferring)	IPR005475 (SMART); G3DSA:1.10.287.1150 (GENE3D); IPR011603 (PIRSF); G3DSA:3.40.50.970 (GENE3D); G3DSA:1.10.287.1150 (GENE3D); IPR031717 (PFAM); IPR005475 (PFAM); IPR032106 (PFAM); IPR001017 (PFAM); IPR011603 (TIGRFAM); G3DSA:3.40.50.11610 (GENE3D); G3DSA:3.40.50.12470 (GENE3D); mobidb-lite (MOBIDB_LITE); IPR011603 (PANTHER); PTHR23152:SF7 (PANTHER); cd02016 (CDD); IPR029061 (SUPERFAMILY); IPR0290…	F:GO:0004591; P:GO:0006099; P:GO:0008152; F:GO:0016624; F:GO:0030976; P:GO:0055114	F:oxoglutarate dehydrogenase (succinyl-transferring) activity; P:tricarboxylic acid cycle; P:metabolic process; F:oxidoreductase activity, acting on the aldehyde or oxo group of donors, disulfide as acceptor; F:thiamine pyrophosphate binding; P:oxidation-reduction process
TRUE	[INTERPRO, BLASTED, MAPPED, GO-SLIM]	DERPT_G5668	: Full=Pyruvate dehydrogenase E1 component subunit beta	368	20	0	68.65	16	C:GO:0005618; C:GO:0005739; C:GO:0005886; P:GO:0005975; P:GO:0005975; P:GO:0006091; P:GO:0006520; P:GO:0006950; P:GO:0009056; P:GO:0009056; P:GO:0009058; P:GO:0009058; F:GO:0016491; C:GO:0032991; P:GO:0034641; P:GO:0051186	C:cell wall; C:mitochondrion; C:plasma membrane; P:carbohydrate metabolic process; P:carbohydrate metabolic process; P:generation of precursor metabolites and energy; P:cellular amino acid metabolic process; P:response to stress; P:catabolic process; P:catabolic process; P:biosynthetic process; P:biosynthetic process; F:oxidoreductase activity; C:protein-containing complex; P:cellular nitrogen co…	EC:1.2.4.4; EC:1.2.4.1	3-methyl-2-oxobutanoate dehydrogenase (2-methylpropanoyl-transferring); Pyruvate dehydrogenase (acetyl-transferring)	IPR005475 (SMART); IPR005475 (PFAM); IPR009014 (G3DSA:3.40.50.GENE3D); IPR033248 (PFAM); G3DSA:3.40.50.970 (GENE3D); PTHR42980:SF1 (PANTHER); PTHR42980 (PANTHER); cd07036 (CDD); IPR029061 (SUPERFAMILY); IPR009014 (SUPERFAMILY)	F:GO:0003824; P:GO:0008152	F:catalytic activity; P:metabolic process
TRUE	[INTERPRO, BLASTED, MAPPED, GO-SLIM]	DERPT_G366	: Full=Dihydropyrimidine dehydrogenase	1022	20	0	62.02	9	C:GO:0005829; P:GO:0006520; P:GO:0009058; P:GO:0009058; C:GO:0009536; F:GO:0016491; P:GO:0034655; F:GO:0043167; P:GO:0051186	C:cytosol; P:cellular amino acid metabolic process; P:biosynthetic process; P:biosynthetic process; C:plastid; F:oxidoreductase activity; P:nucleobase-containing compound catabolic process; F:ion binding; P:cofactor metabolic process	EC:1.3.1.2; EC:1.3.1.1	Dihydropyrimidine dehydrogenase (NADP(+)); Dihydrouracil dehydrogenase (NAD(+))	PR00419 (PRINTS); IPR005720 (TIGRFAM); G3DSA:3.30.70.20 (GENE3D); PF14697 (PFAM); G3DSA:3.30.70.20 (GENE3D); IPR036188 (G3DSA:3.50.50.GENE3D); IPR028261 (PFAM); IPR013785 (G3DSA:3.20.20.GENE3D); IPR023753 (PFAM); IPR036188 (G3DSA:3.50.50.GENE3D); IPR005720 (PFAM); IPR009051 (G3DSA:1.10.1060.GENE3D); PTHR43073:SF2 (PANTHER); PTHR43073 (PANTHER); IPR017900 (PROSITE_PATTERNS); IPR017896 (PROSITE_PRO…	F:GO:0003824; C:GO:0005737; F:GO:0016491; F:GO:0016627; F:GO:0051536; P:GO:0055114	F:catalytic activity; C:cytoplasm; F:oxidoreductase activity; F:oxidoreductase activity, acting on the CH-CH group of donors; F:iron-sulfur cluster binding; P:oxidation-reduction process
TRUE	[INTERPRO, BLASTED, MAPPED, GO-SLIM]	DERPT_G9733	: Full=Prostaglandin reductase 1 Short=PRG-1 ame: Full=15-oxoprostaglandin 13-reductase ame: Full=NADP-dependent leukotriene B4 12-hydroxydehydrogenase	344	20	3.7696e-76	52.4	5	C:GO:0005739; C:GO:0005777; P:GO:0006950; F:GO:0016491; P:GO:0030154	C:mitochondrion; C:peroxisome; P:response to stress; F:oxidoreductase activity; P:cell differentiation	EC:1.3.1.48	15-oxoprostaglandin 13-reductase	IPR020843 (SMART); IPR013154 (PFAM); G3DSA:3.90.180.10 (GENE3D); IPR013149 (PFAM); G3DSA:3.40.50.720 (GENE3D); PTHR43677:SF3 (PANTHER); PTHR43677 (PANTHER); IPR011032 (SUPERFAMILY); IPR036291 (SUPERFAMILY)	F:GO:0016491; P:GO:0055114	F:oxidoreductase activity; P:oxidation-reduction process
TRUE	[INTERPRO, BLASTED, MAPPED, GO-SLIM]	DERPT_G7149	: Full=Prostaglandin reductase-3 Short=PTGR-3 ame: Full=15-oxoprostaglandin 13-reductase ame: Full=Zinc-binding alcohol dehydrogenase domain-containing 2	341	20	2.12702e-86	50.67	6	F:GO:0003723; C:GO:0005739; C:GO:0005777; P:GO:0006950; F:GO:0016491; P:GO:0030154	F:RNA binding; C:mitochondrion; C:peroxisome; P:response to stress; F:oxidoreductase activity; P:cell differentiation	EC:1.3.1.48	15-oxoprostaglandin 13-reductase	IPR020843 (SMART); G3DSA:3.40.50.720 (GENE3D); IPR013149 (PFAM); IPR013154 (PFAM); G3DSA:3.90.180.10 (GENE3D); PTHR43677:SF3 (PANTHER); PTHR43677 (PANTHER); IPR011032 (SUPERFAMILY); IPR036291 (SUPERFAMILY)	F:GO:0016491; P:GO:0055114	F:oxidoreductase activity; P:oxidation-reduction process
TRUE	[INTERPRO, BLASTED, MAPPED, GO-SLIM]	DERPT_G7537	: Full=Peroxisomal acyl-coenzyme A oxidase 1 Short=AOX ame: Full=Palmitoyl- oxidase	756	20	0	50.27	10	C:GO:0005739; C:GO:0005777; P:GO:0006629; P:GO:0006790; P:GO:0009056; P:GO:0009056; F:GO:0016491; F:GO:0043167; P:GO:0044281; P:GO:0051186	C:mitochondrion; C:peroxisome; P:lipid metabolic process; P:sulfur compound metabolic process; P:catabolic process; P:catabolic process; F:oxidoreductase activity; F:ion binding; P:small molecule metabolic process; P:cofactor metabolic process	EC:1.3.3.6	Acyl-CoA oxidase	G3DSA:1.20.140.10 (GENE3D); IPR006091 (PFAM); IPR012258 (PIRSF); G3DSA:1.20.140.10 (GENE3D); G3DSA:2.40.110.10 (GENE3D); IPR002655 (PFAM); PTHR10909 (PANTHER); PTHR10909:SF315 (PANTHER); PTHR10909 (PANTHER); IPR036250 (SUPERFAMILY); IPR036250 (SUPERFAMILY); IPR009100 (SUPERFAMILY)	F:GO:0003997; C:GO:0005777; P:GO:0006631; P:GO:0006635; F:GO:0016627; P:GO:0055114; F:GO:0071949	F:acyl-CoA oxidase activity; C:peroxisome; P:fatty acid metabolic process; P:fatty acid beta-oxidation; F:oxidoreductase activity, acting on the CH-CH group of donors; P:oxidation-reduction process; F:FAD binding
TRUE	[INTERPRO, BLASTED, MAPPED, GO-SLIM]	DERPT_G966	: Full=Succinate dehydrogenase	297	20	1.89614e-137	81.18	14	C:GO:0005576; C:GO:0005654; C:GO:0005739; C:GO:0005773; C:GO:0005856; C:GO:0005886; P:GO:0006091; P:GO:0006810; F:GO:0016491; C:GO:0032991; P:GO:0034641; F:GO:0043167; P:GO:0044281; P:GO:0048856	C:extracellular region; C:nucleoplasm; C:mitochondrion; C:vacuole; C:cytoskeleton; C:plasma membrane; P:generation of precursor metabolites and energy; P:transport; F:oxidoreductase activity; C:protein-containing complex; P:cellular nitrogen compound metabolic process; F:ion binding; P:small molecule metabolic process; P:anatomical structure development	EC:1.3.99.1; EC:1.3.5.1	Deleted entry; Succinate dehydrogenase (quinone)	IPR025192 (PFAM); IPR009051 (G3DSA:1.10.1060.GENE3D); IPR012675 (G3DSA:3.10.20.GENE3D); IPR004489 (TIGRFAM); PF13534 (PFAM); mobidb-lite (MOBIDB_LITE); PTHR11921:SF29 (PANTHER); PTHR11921 (PANTHER); IPR006058 (PROSITE_PATTERNS); IPR017900 (PROSITE_PATTERNS); IPR017896 (PROSITE_PROFILES); IPR001041 (PROSITE_PROFILES); IPR001041 (CDD); IPR036010 (SUPERFAMILY); IPR009051 (SUPERFAMILY)	P:GO:0006099; F:GO:0009055; F:GO:0016491; F:GO:0051536; F:GO:0051537; P:GO:0055114	P:tricarboxylic acid cycle; F:electron transfer activity; F:oxidoreductase activity; F:iron-sulfur cluster binding; F:2 iron, 2 sulfur cluster binding; P:oxidation-reduction process
TRUE	[INTERPRO, BLASTED, MAPPED, GO-SLIM]	DERPT_G11094	: Full=Isovaleryl- mitochondrial Short=IVD Flags: Precursor	455	20	2.1879e-156	59.64	9	C:GO:0005634; C:GO:0005739; P:GO:0006520; P:GO:0006629; P:GO:0009056; P:GO:0009056; F:GO:0016491; P:GO:0042592; F:GO:0043167	C:nucleus; C:mitochondrion; P:cellular amino acid metabolic process; P:lipid metabolic process; P:catabolic process; P:catabolic process; F:oxidoreductase activity; P:homeostatic process; F:ion binding	EC:1.3.99.10; EC:1.3.99.3	Acting on the CH-CH group of donors; Acting on the CH-CH group of donors	IPR037069 (G3DSA:1.10.540.GENE3D); IPR006091 (PFAM); G3DSA:1.20.140.10 (GENE3D); IPR013786 (PFAM); IPR009075 (PFAM); G3DSA:2.40.110.10 (GENE3D); mobidb-lite (MOBIDB_LITE); PTHR43884 (PANTHER); PTHR43884:SF18 (PANTHER); IPR006089 (PROSITE_PATTERNS); IPR006089 (PROSITE_PATTERNS); IPR009100 (SUPERFAMILY); IPR036250 (SUPERFAMILY)	F:GO:0003995; F:GO:0016627; F:GO:0050660; P:GO:0055114	F:acyl-CoA dehydrogenase activity; F:oxidoreductase activity, acting on the CH-CH group of donors; F:flavin adenine dinucleotide binding; P:oxidation-reduction process
TRUE	[INTERPRO, BLASTED, MAPPED, GO-SLIM]	DERPT_G4880	: Full=Short-chain specific acyl- mitochondrial Short=SCAD ame: Full=Butyryl- dehydrogenase Flags: Precursor	776	20	3.7165e-123	55.99	15	C:GO:0005739; P:GO:0006629; P:GO:0006790; P:GO:0006950; P:GO:0009056; P:GO:0009056; P:GO:0009058; P:GO:0009058; F:GO:0016491; P:GO:0034641; P:GO:0042592; F:GO:0043167; P:GO:0044281; P:GO:0048856; P:GO:0051186	C:mitochondrion; P:lipid metabolic process; P:sulfur compound metabolic process; P:response to stress; P:catabolic process; P:catabolic process; P:biosynthetic process; P:biosynthetic process; F:oxidoreductase activity; P:cellular nitrogen compound metabolic process; P:homeostatic process; F:ion binding; P:small molecule metabolic process; P:anatomical structure development; P:cofactor metabolic …	EC:1.3.99.13; EC:1.3.99.3; EC:1.3.3.6	Acting on the CH-CH group of donors; Acting on the CH-CH group of donors; Acyl-CoA oxidase	IPR037069 (G3DSA:1.10.540.GENE3D); G3DSA:2.40.110.10 (GENE3D); IPR006091 (PFAM); IPR013083 (G3DSA:3.30.40.GENE3D); G3DSA:1.20.140.10 (GENE3D); IPR009075 (PFAM); IPR013786 (PFAM); PTHR43516 (PANTHER); PTHR43516:SF6 (PANTHER); IPR006089 (PROSITE_PATTERNS); IPR006089 (PROSITE_PATTERNS); NON_CYTOPLASMIC_DOMAIN (PHOBIUS); TRANSMEMBRANE (PHOBIUS); NON_CYTOPLASMIC_DOMAIN (PHOBIUS); TRANSMEMBRANE (PHOBIU…	F:GO:0003995; F:GO:0016627; F:GO:0050660; P:GO:0055114	F:acyl-CoA dehydrogenase activity; F:oxidoreductase activity, acting on the CH-CH group of donors; F:flavin adenine dinucleotide binding; P:oxidation-reduction process
TRUE	[INTERPRO, BLASTED, MAPPED, GO-SLIM]	DERPT_G3774	: Full=Electron transfer flavo subunit mitochondrial Short=Alpha-ETF Flags: Precursor	348	20	5.44558e-138	70.74	15	C:GO:0005576; C:GO:0005618; C:GO:0005739; C:GO:0005829; C:GO:0005886; P:GO:0006629; P:GO:0006810; P:GO:0009056; P:GO:0009056; F:GO:0016491; C:GO:0032991; P:GO:0042592; F:GO:0043167; P:GO:0044281; P:GO:0048856	C:extracellular region; C:cell wall; C:mitochondrion; C:cytosol; C:plasma membrane; P:lipid metabolic process; P:transport; P:catabolic process; P:catabolic process; F:oxidoreductase activity; C:protein-containing complex; P:homeostatic process; F:ion binding; P:small molecule metabolic process; P:anatomical structure development	EC:1.3.99.3	Acting on the CH-CH group of donors	IPR014730 (SMART); IPR014729 (G3DSA:3.40.50.GENE3D); IPR014730 (PFAM); G3DSA:3.40.50.1220 (GENE3D); IPR014731 (PFAM); IPR001308 (PIRSF); PTHR43153 (PANTHER); PTHR43153:SF1 (PANTHER); IPR018206 (PROSITE_PATTERNS); SIGNAL_PEPTIDE_H_REGION (PHOBIUS); SIGNAL_PEPTIDE_N_REGION (PHOBIUS); NON_CYTOPLASMIC_DOMAIN (PHOBIUS); SIGNAL_PEPTIDE (PHOBIUS); SIGNAL_PEPTIDE_C_REGION (PHOBIUS); IPR033947 (CDD); Sign…	F:GO:0009055; F:GO:0050660	F:electron transfer activity; F:flavin adenine dinucleotide binding
TRUE	[INTERPRO, BLASTED, MAPPED, GO-SLIM]	DERPT_G3623	: Full=Probable acyl- dehydrogenase fadE25	424	20	1.28678e-163	59.71	16	C:GO:0005618; C:GO:0005739; C:GO:0005829; C:GO:0005886; P:GO:0006629; P:GO:0006950; P:GO:0009056; P:GO:0009056; P:GO:0009058; F:GO:0016491; P:GO:0030154; P:GO:0034641; P:GO:0042592; F:GO:0043167; P:GO:0044281; P:GO:0048856	C:cell wall; C:mitochondrion; C:cytosol; C:plasma membrane; P:lipid metabolic process; P:response to stress; P:catabolic process; P:catabolic process; P:biosynthetic process; F:oxidoreductase activity; P:cell differentiation; P:cellular nitrogen compound metabolic process; P:homeostatic process; F:ion binding; P:small molecule metabolic process; P:anatomical structure development	EC:1.3.99.3	Acting on the CH-CH group of donors	IPR009075 (PFAM); IPR013786 (PFAM); G3DSA:2.40.110.10 (GENE3D); IPR037069 (G3DSA:1.10.540.GENE3D); PIRSF016578 (PIRSF); G3DSA:1.20.140.10 (GENE3D); IPR006091 (PFAM); PTHR43831 (PANTHER); IPR036250 (SUPERFAMILY); IPR009100 (SUPERFAMILY)	F:GO:0016627; F:GO:0050660; P:GO:0055114	F:oxidoreductase activity, acting on the CH-CH group of donors; F:flavin adenine dinucleotide binding; P:oxidation-reduction process
TRUE	[INTERPRO, BLASTED, MAPPED, GO-SLIM]	DERPT_G3079	: Full=Very long-chain specific acyl- mitochondrial Short=VLCAD Flags: Precursor	621	20	1.25865e-146	44.48	6	C:GO:0005739; P:GO:0006629; P:GO:0009056; P:GO:0009056; F:GO:0016491; P:GO:0044281	C:mitochondrion; P:lipid metabolic process; P:catabolic process; P:catabolic process; F:oxidoreductase activity; P:small molecule metabolic process	EC:1.3.99.3	Acting on the CH-CH group of donors	IPR009075 (PFAM); G3DSA:1.20.140.10 (GENE3D); G3DSA:2.40.110.20 (GENE3D); IPR006091 (PFAM); PTHR42707:SF2 (PANTHER); PTHR42707 (PANTHER); IPR036250 (SUPERFAMILY); IPR009100 (SUPERFAMILY)	F:GO:0016627; P:GO:0055114	F:oxidoreductase activity, acting on the CH-CH group of donors; P:oxidation-reduction process
TRUE	[INTERPRO, BLASTED, MAPPED, GO-SLIM]	DERPT_G7589	: Full=Glutaryl- mitochondrial Short=GCD Flags: Precursor	985	20	0	63.26	15	P:GO:0000003; C:GO:0005739; C:GO:0005777; P:GO:0006520; P:GO:0006629; P:GO:0006790; P:GO:0009056; P:GO:0009056; P:GO:0009058; P:GO:0009790; F:GO:0016491; P:GO:0034641; P:GO:0042592; F:GO:0043167; P:GO:0051186	P:reproduction; C:mitochondrion; C:peroxisome; P:cellular amino acid metabolic process; P:lipid metabolic process; P:sulfur compound metabolic process; P:catabolic process; P:catabolic process; P:biosynthetic process; P:embryo development; F:oxidoreductase activity; P:cellular nitrogen compound metabolic process; P:homeostatic process; F:ion binding; P:cofactor metabolic process	EC:1.3.99.3; EC:1.3.3.6; EC:1.3.99.7	Acting on the CH-CH group of donors; Acyl-CoA oxidase; Acting on the CH-CH group of donors	IPR006091 (PFAM); IPR037069 (G3DSA:1.10.540.GENE3D); IPR009075 (PFAM); IPR013786 (PFAM); G3DSA:2.40.110.10 (GENE3D); G3DSA:1.20.140.10 (GENE3D); IPR009637 (PFAM); PTHR42807 (PANTHER); IPR006089 (PROSITE_PATTERNS); NON_CYTOPLASMIC_DOMAIN (PHOBIUS); TRANSMEMBRANE (PHOBIUS); TRANSMEMBRANE (PHOBIUS); TRANSMEMBRANE (PHOBIUS); NON_CYTOPLASMIC_DOMAIN (PHOBIUS); TRANSMEMBRANE (PHOBIUS); TRANSMEMBRANE (PH…	F:GO:0003995; C:GO:0016021; F:GO:0016627; F:GO:0050660; P:GO:0055114	F:acyl-CoA dehydrogenase activity; C:integral component of membrane; F:oxidoreductase activity, acting on the CH-CH group of donors; F:flavin adenine dinucleotide binding; P:oxidation-reduction process
TRUE	[INTERPRO, BLASTED, MAPPED, GO-SLIM]	DERPT_G4239	: Full=Very long-chain specific acyl- mitochondrial Short=VLCAD Flags: Precursor	645	20	0	59.33	16	C:GO:0005618; C:GO:0005730; C:GO:0005739; C:GO:0005829; C:GO:0005886; P:GO:0006629; P:GO:0006950; P:GO:0009056; P:GO:0009056; P:GO:0009058; P:GO:0009058; F:GO:0016491; P:GO:0042592; F:GO:0043167; P:GO:0044281; P:GO:0065003	C:cell wall; C:nucleolus; C:mitochondrion; C:cytosol; C:plasma membrane; P:lipid metabolic process; P:response to stress; P:catabolic process; P:catabolic process; P:biosynthetic process; P:biosynthetic process; F:oxidoreductase activity; P:homeostatic process; F:ion binding; P:small molecule metabolic process; P:protein-containing complex assembly	EC:1.3.99; EC:1.3.99.13; EC:1.3.99.3	Acting on the CH-CH group of donors; Acting on the CH-CH group of donors; Acting on the CH-CH group of donors	IPR037069 (G3DSA:1.10.540.GENE3D); G3DSA:2.40.110.10 (GENE3D); IPR009075 (PFAM); IPR006091 (PFAM); G3DSA:1.20.140.10 (GENE3D); IPR013786 (PFAM); G3DSA:1.20.140.10 (GENE3D); PTHR43884 (PANTHER); PTHR43884:SF11 (PANTHER); IPR006089 (PROSITE_PATTERNS); IPR006089 (PROSITE_PATTERNS); IPR036250 (SUPERFAMILY); IPR009100 (SUPERFAMILY)	F:GO:0003995; F:GO:0016627; F:GO:0050660; P:GO:0055114	F:acyl-CoA dehydrogenase activity; F:oxidoreductase activity, acting on the CH-CH group of donors; F:flavin adenine dinucleotide binding; P:oxidation-reduction process
TRUE	[INTERPRO, BLASTED, MAPPED, GO-SLIM]	DERPT_G842	: Full=Medium-chain specific acyl- mitochondrial Short=MCAD Flags: Precursor	430	20	0	68.81	28	C:GO:0005576; C:GO:0005618; C:GO:0005634; C:GO:0005739; C:GO:0005777; C:GO:0005811; C:GO:0005829; C:GO:0005856; C:GO:0005886; P:GO:0005975; P:GO:0005975; P:GO:0006091; P:GO:0006629; P:GO:0006950; P:GO:0009056; P:GO:0009056; P:GO:0009058; P:GO:0009058; F:GO:0016491; F:GO:0016853; P:GO:0030154; C:GO:0032991; P:GO:0034641; P:GO:0042592; F:GO:0043167; P:GO:0044281; P:GO:0048856; P:GO:0065003	C:extracellular region; C:cell wall; C:nucleus; C:mitochondrion; C:peroxisome; C:lipid droplet; C:cytosol; C:cytoskeleton; C:plasma membrane; P:carbohydrate metabolic process; P:carbohydrate metabolic process; P:generation of precursor metabolites and energy; P:lipid metabolic process; P:response to stress; P:catabolic process; P:catabolic process; P:biosynthetic process; P:biosynthetic process; …	EC:1.3.99; EC:1.3.99.3	Acting on the CH-CH group of donors; Acting on the CH-CH group of donors	G3DSA:2.40.110.10 (GENE3D); G3DSA:1.20.140.10 (GENE3D); PIRSF016578 (PIRSF); IPR013786 (PFAM); IPR006091 (PFAM); IPR037069 (G3DSA:1.10.540.GENE3D); IPR009075 (PFAM); PTHR43516:SF5 (PANTHER); PTHR43516 (PANTHER); IPR006089 (PROSITE_PATTERNS); IPR009100 (SUPERFAMILY); IPR036250 (SUPERFAMILY)	F:GO:0003995; F:GO:0016627; F:GO:0050660; P:GO:0055114	F:acyl-CoA dehydrogenase activity; F:oxidoreductase activity, acting on the CH-CH group of donors; F:flavin adenine dinucleotide binding; P:oxidation-reduction process
TRUE	[INTERPRO, BLASTED, MAPPED, GO-SLIM]	DERPT_G3529	: Full=Medium-chain specific acyl- mitochondrial Short=MCAD Flags: Precursor	565	20	0	68.95	28	C:GO:0005576; C:GO:0005618; C:GO:0005634; C:GO:0005739; C:GO:0005777; C:GO:0005811; C:GO:0005829; C:GO:0005856; C:GO:0005886; P:GO:0005975; P:GO:0005975; P:GO:0006091; P:GO:0006629; P:GO:0006950; P:GO:0009056; P:GO:0009056; P:GO:0009058; P:GO:0009058; F:GO:0016491; F:GO:0016853; P:GO:0030154; C:GO:0032991; P:GO:0034641; P:GO:0042592; F:GO:0043167; P:GO:0044281; P:GO:0048856; P:GO:0065003	C:extracellular region; C:cell wall; C:nucleus; C:mitochondrion; C:peroxisome; C:lipid droplet; C:cytosol; C:cytoskeleton; C:plasma membrane; P:carbohydrate metabolic process; P:carbohydrate metabolic process; P:generation of precursor metabolites and energy; P:lipid metabolic process; P:response to stress; P:catabolic process; P:catabolic process; P:biosynthetic process; P:biosynthetic process; …	EC:1.3.99; EC:1.3.99.3	Acting on the CH-CH group of donors; Acting on the CH-CH group of donors	IPR013786 (PFAM); G3DSA:1.20.140.10 (GENE3D); IPR009075 (PFAM); IPR037069 (G3DSA:1.10.540.GENE3D); G3DSA:2.40.110.10 (GENE3D); IPR006091 (PFAM); PTHR43516 (PANTHER); PTHR43516:SF5 (PANTHER); IPR006089 (PROSITE_PATTERNS); IPR006089 (PROSITE_PATTERNS); IPR009100 (SUPERFAMILY); IPR036250 (SUPERFAMILY)	F:GO:0003995; F:GO:0016627; F:GO:0050660; P:GO:0055114	F:acyl-CoA dehydrogenase activity; F:oxidoreductase activity, acting on the CH-CH group of donors; F:flavin adenine dinucleotide binding; P:oxidation-reduction process
TRUE	[INTERPRO, BLASTED, MAPPED, GO-SLIM]	DERPT_G1322	: Full=Short-chain specific acyl- mitochondrial Short=SCAD ame: Full=Butyryl- dehydrogenase Flags: Precursor	421	20	0	67.12	14	C:GO:0005576; C:GO:0005618; C:GO:0005739; C:GO:0005829; C:GO:0005886; P:GO:0006629; P:GO:0006790; P:GO:0009056; P:GO:0009056; F:GO:0016491; P:GO:0042592; F:GO:0043167; P:GO:0044281; P:GO:0051186	C:extracellular region; C:cell wall; C:mitochondrion; C:cytosol; C:plasma membrane; P:lipid metabolic process; P:sulfur compound metabolic process; P:catabolic process; P:catabolic process; F:oxidoreductase activity; P:homeostatic process; F:ion binding; P:small molecule metabolic process; P:cofactor metabolic process	EC:1.3.99; EC:1.3.99.3	Acting on the CH-CH group of donors; Acting on the CH-CH group of donors	PIRSF016578 (PIRSF); IPR037069 (G3DSA:1.10.540.GENE3D); IPR013786 (PFAM); IPR009075 (PFAM); G3DSA:2.40.110.10 (GENE3D); IPR006091 (PFAM); G3DSA:1.20.140.10 (GENE3D); PTHR43884 (PANTHER); PTHR43884:SF1 (PANTHER); IPR006089 (PROSITE_PATTERNS); cd01158 (CDD); IPR036250 (SUPERFAMILY); IPR009100 (SUPERFAMILY)	F:GO:0003995; F:GO:0016627; F:GO:0050660; P:GO:0055114	F:acyl-CoA dehydrogenase activity; F:oxidoreductase activity, acting on the CH-CH group of donors; F:flavin adenine dinucleotide binding; P:oxidation-reduction process
TRUE	[INTERPRO, BLASTED, MAPPED, GO-SLIM]	DERPT_G10545	: Full=Glutamate synthase	2084	20	0	62.47	12	C:GO:0005576; C:GO:0005739; C:GO:0005829; C:GO:0005886; P:GO:0006520; P:GO:0009058; P:GO:0009058; C:GO:0009536; F:GO:0016491; P:GO:0040007; F:GO:0043167; P:GO:0071941	C:extracellular region; C:mitochondrion; C:cytosol; C:plasma membrane; P:cellular amino acid metabolic process; P:biosynthetic process; P:biosynthetic process; C:plastid; F:oxidoreductase activity; P:growth; F:ion binding; P:nitrogen cycle metabolic process	EC:1.4.1.14; EC:1.4.7.1	Glutamate synthase (NADH); Glutamate synthase (ferredoxin)	PR00419 (PRINTS); IPR023753 (PFAM); IPR009051 (G3DSA:1.10.1060.GENE3D); IPR036485 (G3DSA:2.160.20.GENE3D); IPR036188 (G3DSA:3.50.50.GENE3D); IPR013785 (G3DSA:3.20.20.GENE3D); IPR013785 (G3DSA:3.20.20.GENE3D); IPR006982 (PFAM); IPR028261 (PFAM); IPR002932 (PFAM); IPR029055 (G3DSA:3.60.20.GENE3D); IPR002489 (PFAM); IPR036188 (G3DSA:3.50.50.GENE3D); IPR006005 (TIGRFAM); IPR012220 (PIRSF); IPR017932 …	F:GO:0003824; F:GO:0005506; P:GO:0006537; P:GO:0006807; P:GO:0008152; F:GO:0010181; F:GO:0015930; F:GO:0016040; F:GO:0016491; F:GO:0016638; F:GO:0016639; F:GO:0050660; F:GO:0051536; P:GO:0055114	F:catalytic activity; F:iron ion binding; P:glutamate biosynthetic process; P:nitrogen compound metabolic process; P:metabolic process; F:FMN binding; F:glutamate synthase activity; F:glutamate synthase (NADH) activity; F:oxidoreductase activity; F:oxidoreductase activity, acting on the CH-NH2 group of donors; F:oxidoreductase activity, acting on the CH-NH2 group of donors, NAD or NADP as accepto…
TRUE	[INTERPRO, BLASTED, MAPPED, GO-SLIM]	DERPT_G9052	: Full=Glutamate dehydrogenase mitochondrial Short=GDH 2 Flags: Precursor	566	20	0	75.18	18	P:GO:0000003; C:GO:0005739; C:GO:0005773; C:GO:0005829; P:GO:0006520; P:GO:0006810; P:GO:0006810; P:GO:0006950; P:GO:0007267; P:GO:0009056; P:GO:0009056; P:GO:0009058; P:GO:0009058; F:GO:0016491; F:GO:0019899; P:GO:0034641; F:GO:0043167; P:GO:0051186	P:reproduction; C:mitochondrion; C:vacuole; C:cytosol; P:cellular amino acid metabolic process; P:transport; P:transport; P:response to stress; P:cell-cell signaling; P:catabolic process; P:catabolic process; P:biosynthetic process; P:biosynthetic process; F:oxidoreductase activity; F:enzyme binding; P:cellular nitrogen compound metabolic process; F:ion binding; P:cofactor metabolic process	EC:1.4.1.3; EC:1.4.1.2	Glutamate dehydrogenase (NAD(P)(+)); Glutamate dehydrogenase	IPR006095 (PRINTS); IPR006096 (SMART); G3DSA:3.40.50.10860 (GENE3D); IPR006096 (PFAM); IPR006097 (PFAM); G3DSA:1.10.287.140 (GENE3D); G3DSA:3.40.50.720 (GENE3D); PTHR11606:SF25 (PANTHER); PTHR11606 (PANTHER); IPR033524 (PROSITE_PATTERNS); IPR033922 (CDD); SignalP-TM (SIGNALP_GRAM_POSITIVE); SSF53223 (SUPERFAMILY); IPR036291 (SUPERFAMILY)	P:GO:0006520; F:GO:0016491; F:GO:0016639; P:GO:0055114	P:cellular amino acid metabolic process; F:oxidoreductase activity; F:oxidoreductase activity, acting on the CH-NH2 group of donors, NAD or NADP as acceptor; P:oxidation-reduction process
TRUE	[INTERPRO, BLASTED, MAPPED, GO-SLIM]	DERPT_G10548	: Full=D-amino-acid oxidase Short=DAAO Short=DAMOX Short=DAO	335	20	1.15515e-59	52.67	7	P:GO:0000003; C:GO:0005737; P:GO:0006520; P:GO:0009056; P:GO:0009056; F:GO:0016491; F:GO:0043167	P:reproduction; C:cytoplasm; P:cellular amino acid metabolic process; P:catabolic process; P:catabolic process; F:oxidoreductase activity; F:ion binding	EC:1.4.3.1; EC:1.4.3.3	D-aspartate oxidase; D-amino-acid oxidase	G3DSA:3.30.9.10 (GENE3D); G3DSA:3.40.50.720 (GENE3D); IPR023209 (PIRSF); IPR006076 (PFAM); PTHR11530:SF11 (PANTHER); IPR023209 (PANTHER); IPR006181 (PROSITE_PATTERNS); SIGNAL_PEPTIDE (PHOBIUS); SIGNAL_PEPTIDE_H_REGION (PHOBIUS); NON_CYTOPLASMIC_DOMAIN (PHOBIUS); SIGNAL_PEPTIDE_C_REGION (PHOBIUS); SIGNAL_PEPTIDE_N_REGION (PHOBIUS); SSF51971 (SUPERFAMILY); SSF54373 (SUPERFAMILY); TMhelix (TMHMM)	F:GO:0003884; F:GO:0016491; P:GO:0046416; P:GO:0055114; F:GO:0071949	F:D-amino-acid oxidase activity; F:oxidoreductase activity; P:D-amino acid metabolic process; P:oxidation-reduction process; F:FAD binding
TRUE	[INTERPRO, BLASTED, MAPPED, GO-SLIM]	DERPT_G1411	: Full=D-amino-acid oxidase Short=DAAO Short=DAMOX Short=DAO	865	20	3.61889e-57	53.14	12	P:GO:0000003; F:GO:0003677; C:GO:0005634; C:GO:0005737; P:GO:0006259; P:GO:0006520; P:GO:0009056; P:GO:0009056; P:GO:0009058; F:GO:0016491; F:GO:0016779; F:GO:0043167	P:reproduction; F:DNA binding; C:nucleus; C:cytoplasm; P:DNA metabolic process; P:cellular amino acid metabolic process; P:catabolic process; P:catabolic process; P:biosynthetic process; F:oxidoreductase activity; F:nucleotidyltransferase activity; F:ion binding	EC:1.4.3.1; EC:2.7.7.7; EC:1.4.3.3	D-aspartate oxidase; DNA-directed DNA polymerase; D-amino-acid oxidase	G3DSA:3.60.21.60 (GENE3D); IPR007185 (PFAM); IPR006076 (PFAM); G3DSA:3.30.9.10 (GENE3D); G3DSA:3.40.50.720 (GENE3D); PTHR11530:SF17 (PANTHER); IPR023209 (PANTHER); IPR006181 (PROSITE_PATTERNS); SSF51971 (SUPERFAMILY); SSF54373 (SUPERFAMILY)	F:GO:0003677; F:GO:0003884; F:GO:0003887; P:GO:0006260; F:GO:0016491; P:GO:0046416; P:GO:0055114; F:GO:0071949	F:DNA binding; F:D-amino-acid oxidase activity; F:DNA-directed DNA polymerase activity; P:DNA replication; F:oxidoreductase activity; P:D-amino acid metabolic process; P:oxidation-reduction process; F:FAD binding
TRUE	[INTERPRO, BLASTED, MAPPED, GO-SLIM]	DERPT_G4969	: Full=Amine oxidase	1082	20	0	66.88	5	C:GO:0005739; P:GO:0009056; F:GO:0016491; P:GO:0034641; F:GO:0043167	C:mitochondrion; P:catabolic process; F:oxidoreductase activity; P:cellular nitrogen compound metabolic process; F:ion binding	EC:1.4.3.21	Primary-amine oxidase	IPR001613 (PRINTS); IPR036188 (G3DSA:3.50.50.GENE3D); IPR036188 (G3DSA:3.50.50.GENE3D); G3DSA:3.90.660.10 (GENE3D); G3DSA:1.10.405.10 (GENE3D); G3DSA:3.90.660.10 (GENE3D); IPR002937 (PFAM); PTHR43563 (PANTHER); PTHR43563:SF3 (PANTHER); CYTOPLASMIC_DOMAIN (PHOBIUS); TRANSMEMBRANE (PHOBIUS); NON_CYTOPLASMIC_DOMAIN (PHOBIUS); SSF54373 (SUPERFAMILY); IPR036188 (SUPERFAMILY); SSF54373 (SUPERFAMILY); I…	F:GO:0016491; P:GO:0055114	F:oxidoreductase activity; P:oxidation-reduction process
TRUE	[INTERPRO, BLASTED, MAPPED, GO-SLIM]	DERPT_G8802	: Full=Pyridoxine pyridoxamine 5 -phosphate oxidase ame: Full=PNP PMP oxidase Short=PNPOx ame: Full=Pyridoxal 5 -phosphate synthase	224	20	7.43097e-63	62.32	8	C:GO:0005622; P:GO:0009058; P:GO:0009058; F:GO:0016491; P:GO:0034641; F:GO:0043167; C:GO:0043226; P:GO:0044281	C:intracellular; P:biosynthetic process; P:biosynthetic process; F:oxidoreductase activity; P:cellular nitrogen compound metabolic process; F:ion binding; C:organelle; P:small molecule metabolic process	EC:1.4.3.5	Pyridoxal 5'-phosphate synthase	IPR011576 (PFAM); IPR012349 (G3DSA:2.30.110.GENE3D); IPR000659 (PIRSF); IPR019576 (PFAM); IPR000659 (TIGRFAM); PTHR10851 (PANTHER); IPR000659 (PTHR10851:PANTHER); IPR000659 (HAMAP); SSF50475 (SUPERFAMILY)	F:GO:0004733; P:GO:0008615; F:GO:0010181; F:GO:0048037	F:pyridoxamine-phosphate oxidase activity; P:pyridoxine biosynthetic process; F:FMN binding; F:cofactor binding
TRUE	[INTERPRO, BLASTED, MAPPED, GO-SLIM]	DERPT_G11274	: Full=Pyridoxine pyridoxamine 5 -phosphate oxidase ame: Full=PNP PMP oxidase Short=PNPOx ame: Full=Pyridoxal 5 -phosphate synthase	389	20	6.88794e-56	62.71	9	C:GO:0005739; P:GO:0006810; P:GO:0006810; P:GO:0009058; P:GO:0009058; F:GO:0016491; P:GO:0034641; F:GO:0043167; P:GO:0044281	C:mitochondrion; P:transport; P:transport; P:biosynthetic process; P:biosynthetic process; F:oxidoreductase activity; P:cellular nitrogen compound metabolic process; F:ion binding; P:small molecule metabolic process	EC:1.4.3.5	Pyridoxal 5'-phosphate synthase	IPR019576 (PFAM); IPR012349 (G3DSA:2.30.110.GENE3D); IPR005336 (PFAM); IPR000659 (TIGRFAM); IPR011576 (PFAM); mobidb-lite (MOBIDB_LITE); PTHR10851 (PANTHER); IPR000659 (PTHR10851:PANTHER); IPR019740 (PROSITE_PATTERNS); NON_CYTOPLASMIC_DOMAIN (PHOBIUS); TRANSMEMBRANE (PHOBIUS); CYTOPLASMIC_DOMAIN (PHOBIUS); IPR000659 (HAMAP); SSF50475 (SUPERFAMILY)	F:GO:0004733; C:GO:0005743; P:GO:0006850; P:GO:0008615; F:GO:0010181; F:GO:0016638; F:GO:0048037; P:GO:0055114	F:pyridoxamine-phosphate oxidase activity; C:mitochondrial inner membrane; P:mitochondrial pyruvate transmembrane transport; P:pyridoxine biosynthetic process; F:FMN binding; F:oxidoreductase activity, acting on the CH-NH2 group of donors; F:cofactor binding; P:oxidation-reduction process
TRUE	[INTERPRO, BLASTED, MAPPED, GO-SLIM]	DERPT_G624	: Full=Glycine dehydrogenase (decarboxylating) mitochondrial ame: Full=Glycine cleavage system P ame: Full=Glycine decarboxylase ame: Full=Glycine dehydrogenase (aminomethyl-transferring) Flags: Precursor	1043	20	0	70	13	C:GO:0005576; C:GO:0005634; C:GO:0005739; C:GO:0005829; C:GO:0005886; P:GO:0006520; P:GO:0009056; P:GO:0009056; C:GO:0009536; C:GO:0009579; F:GO:0016491; F:GO:0019899; F:GO:0043167	C:extracellular region; C:nucleus; C:mitochondrion; C:cytosol; C:plasma membrane; P:cellular amino acid metabolic process; P:catabolic process; P:catabolic process; C:plastid; C:thylakoid; F:oxidoreductase activity; F:enzyme binding; F:ion binding	EC:1.4.4.2	Glycine dehydrogenase (aminomethyl-transferring)	IPR015421 (G3DSA:3.40.640.GENE3D); IPR003437 (TIGRFAM); IPR020581 (PFAM); IPR015422 (G3DSA:3.90.1150.GENE3D); IPR020581 (PANTHER); IPR020581 (CDD); IPR020581 (CDD); IPR015424 (SUPERFAMILY); IPR015424 (SUPERFAMILY)	F:GO:0003824; F:GO:0004375; P:GO:0006544; P:GO:0006546; P:GO:0055114	F:catalytic activity; F:glycine dehydrogenase (decarboxylating) activity; P:glycine metabolic process; P:glycine catabolic process; P:oxidation-reduction process
TRUE	[INTERPRO, BLASTED, MAPPED, GO-SLIM]	DERPT_G3552	: Full=1-pyrroline-5-carboxylate dehydrogenase Short=P5C dehydrogenase ame: Full=L-glutamate gamma-semialdehyde dehydrogenase	597	20	0	59.66	13	C:GO:0005739; P:GO:0005975; P:GO:0005975; P:GO:0006091; P:GO:0006520; P:GO:0006629; P:GO:0009056; P:GO:0009056; P:GO:0009058; P:GO:0009058; F:GO:0016491; P:GO:0034641; P:GO:0051186	C:mitochondrion; P:carbohydrate metabolic process; P:carbohydrate metabolic process; P:generation of precursor metabolites and energy; P:cellular amino acid metabolic process; P:lipid metabolic process; P:catabolic process; P:catabolic process; P:biosynthetic process; P:biosynthetic process; F:oxidoreductase activity; P:cellular nitrogen compound metabolic process; P:cofactor metabolic process	EC:1.5.1.12; EC:1.2.1.3	Acting on the CH-NH group of donors; Aldehyde dehydrogenase (NAD(+))	IPR005931 (TIGRFAM); IPR016162 (G3DSA:3.40.605.GENE3D); IPR016163 (G3DSA:3.40.309.GENE3D); IPR015590 (PFAM); PTHR42862 (PANTHER); IPR029510 (PROSITE_PATTERNS); IPR016160 (PROSITE_PATTERNS); IPR005931 (CDD); IPR016161 (SUPERFAMILY)	F:GO:0003842; P:GO:0008152; P:GO:0010133; F:GO:0016491; F:GO:0016620; P:GO:0055114	F:1-pyrroline-5-carboxylate dehydrogenase activity; P:metabolic process; P:proline catabolic process to glutamate; F:oxidoreductase activity; F:oxidoreductase activity, acting on the aldehyde or oxo group of donors, NAD or NADP as acceptor; P:oxidation-reduction process
TRUE	[INTERPRO, BLASTED, MAPPED, GO-SLIM]	DERPT_G3583	: Full= arginine N-methyltransferase 5 ame: Full=Histone-arginine N-methyltransferase PRMT5 ame: Full=Shk1 kinase-binding 1 homolog Short=SKB1 homolog	902	20	1.89613e-131	54.8	25	P:GO:0000003; F:GO:0000988; F:GO:0003677; C:GO:0005634; C:GO:0005654; C:GO:0005694; C:GO:0005829; C:GO:0005856; P:GO:0006464; P:GO:0006950; P:GO:0007049; P:GO:0007165; F:GO:0008168; P:GO:0009058; P:GO:0009058; P:GO:0009790; F:GO:0016491; P:GO:0021700; P:GO:0022607; P:GO:0030154; C:GO:0032991; P:GO:0034641; P:GO:0044281; P:GO:0051186; P:GO:0051276	P:reproduction; F:obsolete transcription factor activity, protein binding; F:DNA binding; C:nucleus; C:nucleoplasm; C:chromosome; C:cytosol; C:cytoskeleton; P:cellular protein modification process; P:response to stress; P:cell cycle; P:signal transduction; F:methyltransferase activity; P:biosynthetic process; P:biosynthetic process; P:embryo development; F:oxidoreductase activity; P:developmental…	EC:1.5.1.15; EC:1.5.1.5	Methylenetetrahydrofolate dehydrogenase (NAD(+)); Methylenetetrahydrofolate dehydrogenase (NADP(+))	G3DSA:3.40.50.150 (GENE3D); IPR020630 (PFAM); G3DSA:3.40.50.10860 (GENE3D); IPR007857 (PIRSF); G3DSA:2.70.160.11 (GENE3D); G3DSA:3.20.20.150 (GENE3D); IPR035248 (PFAM); IPR035247 (PFAM); IPR020631 (PFAM); IPR035075 (PFAM); G3DSA:3.40.50.720 (GENE3D); IPR007857 (PANTHER); IPR025799 (PROSITE_PROFILES); IPR029063 (SUPERFAMILY); SSF53223 (SUPERFAMILY); IPR036291 (SUPERFAMILY)	F:GO:0004488; P:GO:0006479; F:GO:0008168; P:GO:0035246; P:GO:0055114	F:methylenetetrahydrofolate dehydrogenase (NADP+) activity; P:protein methylation; F:methyltransferase activity; P:peptidyl-arginine N-methylation; P:oxidation-reduction process
TRUE	[INTERPRO, BLASTED, MAPPED, GO-SLIM]	DERPT_G10029	: Full=Bifunctional Includes: ame: Full=Methylenetetrahydrofolate dehydrogenase Includes: ame: Full=Methenyltetrahydrofolate cyclohydrolase	437	20	8.97766e-113	68.51	18	P:GO:0002376; C:GO:0005576; C:GO:0005739; C:GO:0005811; C:GO:0005829; P:GO:0006259; P:GO:0006520; P:GO:0006790; P:GO:0009058; P:GO:0009058; C:GO:0009536; P:GO:0009790; F:GO:0016491; F:GO:0016810; F:GO:0016874; P:GO:0042592; P:GO:0048646; P:GO:0051186	P:immune system process; C:extracellular region; C:mitochondrion; C:lipid droplet; C:cytosol; P:DNA metabolic process; P:cellular amino acid metabolic process; P:sulfur compound metabolic process; P:biosynthetic process; P:biosynthetic process; C:plastid; P:embryo development; F:oxidoreductase activity; F:hydrolase activity, acting on carbon-nitrogen (but not peptide) bonds; F:ligase activity; P:…	EC:1.5.1.15; EC:6.3.4.3; EC:3.5.4.9; EC:1.5.1.5	Methylenetetrahydrofolate dehydrogenase (NAD(+)); Formate--tetrahydrofolate ligase; Methenyltetrahydrofolate cyclohydrolase; Methylenetetrahydrofolate dehydrogenase (NADP(+))	IPR000672 (PRINTS); G3DSA:3.40.50.10860 (GENE3D); IPR020630 (PFAM); IPR020631 (PFAM); G3DSA:3.40.50.720 (GENE3D); PTHR43274:SF2 (PANTHER); PTHR43274 (PANTHER); IPR020867 (PROSITE_PATTERNS); IPR000672 (HAMAP); cd01080 (CDD); IPR036291 (SUPERFAMILY); SSF53223 (SUPERFAMILY)	F:GO:0003824; F:GO:0004488; P:GO:0055114	F:catalytic activity; F:methylenetetrahydrofolate dehydrogenase (NADP+) activity; P:oxidation-reduction process
TRUE	[INTERPRO, BLASTED, MAPPED, GO-SLIM]	DERPT_G10028	: Full=C-1-tetrahydrofolate cytoplasmic Short=C1-THF synthase Includes: ame: Full=Methylenetetrahydrofolate dehydrogenase Includes: ame: Full=Methenyltetrahydrofolate cyclohydrolase Includes: ame: Full=Formyltetrahydrofolate synthetase	640	20	0	72.05	21	P:GO:0002376; C:GO:0005576; C:GO:0005634; C:GO:0005739; C:GO:0005811; C:GO:0005829; C:GO:0005886; P:GO:0006520; P:GO:0006790; P:GO:0009058; P:GO:0009058; C:GO:0009536; P:GO:0009790; F:GO:0016491; F:GO:0016810; F:GO:0016874; P:GO:0034641; P:GO:0042592; F:GO:0043167; P:GO:0048646; P:GO:0051186	P:immune system process; C:extracellular region; C:nucleus; C:mitochondrion; C:lipid droplet; C:cytosol; C:plasma membrane; P:cellular amino acid metabolic process; P:sulfur compound metabolic process; P:biosynthetic process; P:biosynthetic process; C:plastid; P:embryo development; F:oxidoreductase activity; F:hydrolase activity, acting on carbon-nitrogen (but not peptide) bonds; F:ligase activit…	EC:1.5.1.15; EC:6.3.4.3; EC:3.5.4.9; EC:1.5.1.5	Methylenetetrahydrofolate dehydrogenase (NAD(+)); Formate--tetrahydrofolate ligase; Methenyltetrahydrofolate cyclohydrolase; Methylenetetrahydrofolate dehydrogenase (NADP(+))	G3DSA:1.10.8.770 (GENE3D); IPR000559 (PFAM); G3DSA:3.10.410.10 (GENE3D); PTHR43274 (PANTHER); IPR020628 (PROSITE_PATTERNS); IPR000559 (HAMAP); IPR000559 (CDD); IPR027417 (SUPERFAMILY)	F:GO:0004329; F:GO:0005524	F:formate-tetrahydrofolate ligase activity; F:ATP binding
TRUE	[INTERPRO, BLASTED, MAPPED, GO-SLIM]	DERPT_G7271	: Full=Pyrroline-5-carboxylate reductase 3 Short=P5C reductase 3 Short=P5CR 3 ame: Full=Pyrroline-5-carboxylate reductase	320	20	4.63016e-22	45.04	5	C:GO:0005737; P:GO:0006520; P:GO:0009058; P:GO:0009058; F:GO:0016491	C:cytoplasm; P:cellular amino acid metabolic process; P:biosynthetic process; P:biosynthetic process; F:oxidoreductase activity	EC:1.5.1.2	Pyrroline-5-carboxylate reductase	IPR028939 (PFAM); G3DSA:3.40.50.720 (GENE3D); IPR000304 (PIRSF); G3DSA:1.10.3730.10 (GENE3D); IPR029036 (PFAM); mobidb-lite (MOBIDB_LITE); PTHR11645 (PANTHER); IPR008927 (SUPERFAMILY); IPR036291 (SUPERFAMILY)	F:GO:0004735; P:GO:0006561; P:GO:0055114	F:pyrroline-5-carboxylate reductase activity; P:proline biosynthetic process; P:oxidation-reduction process
TRUE	[INTERPRO, BLASTED, MAPPED, GO-SLIM]	DERPT_G477	: Full=Pyrroline-5-carboxylate reductase 2 Short=P5C reductase 2 Short=P5CR 2	267	20	1.02105e-86	67.35	8	C:GO:0005618; C:GO:0005739; P:GO:0006520; P:GO:0006950; P:GO:0008219; P:GO:0009058; P:GO:0009058; F:GO:0016491	C:cell wall; C:mitochondrion; P:cellular amino acid metabolic process; P:response to stress; P:cell death; P:biosynthetic process; P:biosynthetic process; F:oxidoreductase activity	EC:1.5.1.2	Pyrroline-5-carboxylate reductase	G3DSA:3.40.50.720 (GENE3D); G3DSA:1.10.3730.10 (GENE3D); IPR028939 (PFAM); IPR029036 (PFAM); IPR000304 (PIRSF); IPR000304 (TIGRFAM); PTHR11645:SF46 (PANTHER); PTHR11645 (PANTHER); IPR000304 (HAMAP); IPR036291 (SUPERFAMILY); IPR008927 (SUPERFAMILY)	F:GO:0004735; P:GO:0006561; P:GO:0055114	F:pyrroline-5-carboxylate reductase activity; P:proline biosynthetic process; P:oxidation-reduction process
TRUE	[INTERPRO, BLASTED, MAPPED, GO-SLIM]	DERPT_G11847	: Full=Pyrroline-5-carboxylate reductase Short=P5C reductase Short=P5CR ame: Full=PCA reductase	298	20	5.48536e-43	52.04	6	C:GO:0005737; P:GO:0006520; P:GO:0006950; P:GO:0009058; P:GO:0009058; F:GO:0016491	C:cytoplasm; P:cellular amino acid metabolic process; P:response to stress; P:biosynthetic process; P:biosynthetic process; F:oxidoreductase activity	EC:1.5.1.2	Pyrroline-5-carboxylate reductase	IPR028939 (PFAM); G3DSA:1.10.3730.10 (GENE3D); IPR029036 (PFAM); IPR000304 (TIGRFAM); G3DSA:3.40.50.720 (GENE3D); IPR000304 (PIRSF); PTHR11645 (PANTHER); PTHR11645:SF0 (PANTHER); IPR000304 (PROSITE_PATTERNS); IPR000304 (HAMAP); IPR008927 (SUPERFAMILY); IPR036291 (SUPERFAMILY); TMhelix (TMHMM)	F:GO:0004735; P:GO:0006561; P:GO:0055114	F:pyrroline-5-carboxylate reductase activity; P:proline biosynthetic process; P:oxidation-reduction process
TRUE	[INTERPRO, BLASTED, MAPPED, GO-SLIM]	DERPT_G10878	: Full=Pyrroline-5-carboxylate reductase 3 Short=P5C reductase 3 Short=P5CR 3 ame: Full=Pyrroline-5-carboxylate reductase	466	20	6.80926e-33	46.76	6	C:GO:0005623; P:GO:0006520; P:GO:0006950; P:GO:0009058; P:GO:0009058; F:GO:0016491	C:cell; P:cellular amino acid metabolic process; P:response to stress; P:biosynthetic process; P:biosynthetic process; F:oxidoreductase activity	EC:1.5.1.2	Pyrroline-5-carboxylate reductase	Coil (COILS); IPR029036 (PFAM); G3DSA:3.40.50.720 (GENE3D); G3DSA:1.10.3730.10 (GENE3D); IPR028939 (PFAM); mobidb-lite (MOBIDB_LITE); PTHR11645:SF22 (PANTHER); PTHR11645 (PANTHER); IPR000304 (HAMAP); IPR008927 (SUPERFAMILY); IPR036291 (SUPERFAMILY)	F:GO:0004735; P:GO:0006561; P:GO:0055114	F:pyrroline-5-carboxylate reductase activity; P:proline biosynthetic process; P:oxidation-reduction process
TRUE	[INTERPRO, BLASTED, MAPPED, GO-SLIM]	DERPT_G10183	: Full=Pyrroline-5-carboxylate reductase 3 Short=P5C reductase 3 Short=P5CR 3 ame: Full=Pyrroline-5-carboxylate reductase	309	20	8.08088e-33	47.88	4	P:GO:0006520; P:GO:0009058; P:GO:0009058; F:GO:0016491	P:cellular amino acid metabolic process; P:biosynthetic process; P:biosynthetic process; F:oxidoreductase activity	EC:1.5.1.2	Pyrroline-5-carboxylate reductase	IPR028939 (PFAM); G3DSA:1.10.3730.10 (GENE3D); IPR000304 (PIRSF); G3DSA:3.40.50.720 (GENE3D); IPR029036 (PFAM); PTHR11645 (PANTHER); IPR000304 (HAMAP); IPR036291 (SUPERFAMILY); IPR008927 (SUPERFAMILY)	F:GO:0004735; P:GO:0006561; P:GO:0055114	F:pyrroline-5-carboxylate reductase activity; P:proline biosynthetic process; P:oxidation-reduction process
TRUE	[INTERPRO, BLASTED, MAPPED, GO-SLIM]	DERPT_G5264	: Full=Methylenetetrahydrofolate reductase	1131	20	0	55.72	13	C:GO:0005739; C:GO:0005829; C:GO:0005886; P:GO:0006520; P:GO:0006790; P:GO:0009058; P:GO:0009058; F:GO:0016491; F:GO:0022857; F:GO:0022857; F:GO:0022857; P:GO:0034641; P:GO:0051186	C:mitochondrion; C:cytosol; C:plasma membrane; P:cellular amino acid metabolic process; P:sulfur compound metabolic process; P:biosynthetic process; P:biosynthetic process; F:oxidoreductase activity; F:transmembrane transporter activity; F:transmembrane transporter activity; F:transmembrane transporter activity; P:cellular nitrogen compound metabolic process; P:cofactor metabolic process	EC:1.5.1.20	Methylenetetrahydrofolate reductase (NAD(P)H)	IPR004680 (PFAM); G3DSA:3.20.20.220 (GENE3D); IPR003171 (PFAM); PTHR21091 (PANTHER); PTHR21091:SF31 (PANTHER); TRANSMEMBRANE (PHOBIUS); NON_CYTOPLASMIC_DOMAIN (PHOBIUS); NON_CYTOPLASMIC_DOMAIN (PHOBIUS); CYTOPLASMIC_DOMAIN (PHOBIUS); CYTOPLASMIC_DOMAIN (PHOBIUS); TRANSMEMBRANE (PHOBIUS); NON_CYTOPLASMIC_DOMAIN (PHOBIUS); TRANSMEMBRANE (PHOBIUS); TRANSMEMBRANE (PHOBIUS); CYTOPLASMIC_DOMAIN (PHOBIU…	F:GO:0004489; P:GO:0006555; C:GO:0016021; P:GO:0055085; P:GO:0055114	F:methylenetetrahydrofolate reductase (NAD(P)H) activity; P:methionine metabolic process; C:integral component of membrane; P:transmembrane transport; P:oxidation-reduction process
TRUE	[INTERPRO, BLASTED, MAPPED, GO-SLIM]	DERPT_G9761	: Full=Dihydropteridine reductase ame: Full=HDHPR ame: Full=Quinoid dihydropteridine reductase	243	6	3.5637e-92	72.07	12	C:GO:0005576; C:GO:0005739; C:GO:0005829; P:GO:0006520; P:GO:0009056; P:GO:0009056; P:GO:0009058; P:GO:0009058; F:GO:0016491; P:GO:0034641; F:GO:0043167; P:GO:0051186	C:extracellular region; C:mitochondrion; C:cytosol; P:cellular amino acid metabolic process; P:catabolic process; P:catabolic process; P:biosynthetic process; P:biosynthetic process; F:oxidoreductase activity; P:cellular nitrogen compound metabolic process; F:ion binding; P:cofactor metabolic process	EC:1.5.1.34	6,7-dihydropteridine reductase	G3DSA:3.40.50.720 (GENE3D); IPR002347 (PFAM); PTHR15104 (PANTHER); IPR020904 (PROSITE_PATTERNS); cd05334 (CDD); IPR036291 (SUPERFAMILY)	F:GO:0016491	F:oxidoreductase activity
TRUE	[INTERPRO, BLASTED, MAPPED, GO-SLIM]	DERPT_G8328	: Full=Proline dehydrogenase mitochondrial ame: Full=Proline oxidase Flags: Precursor	629	16	0	56.29	10	C:GO:0005739; P:GO:0006520; P:GO:0006950; P:GO:0009056; P:GO:0009056; P:GO:0009058; P:GO:0009058; F:GO:0016491; P:GO:0040011; F:GO:0043167	C:mitochondrion; P:cellular amino acid metabolic process; P:response to stress; P:catabolic process; P:catabolic process; P:biosynthetic process; P:biosynthetic process; F:oxidoreductase activity; P:locomotion; F:ion binding	EC:1.5.99.8	Acting on the CH-NH group of donors	G3DSA:3.20.20.220 (GENE3D); IPR002872 (PFAM); IPR015659 (PANTHER); PTHR13914:SF0 (PANTHER); IPR029041 (SUPERFAMILY)	F:GO:0004657; P:GO:0006562	F:proline dehydrogenase activity; P:proline catabolic process
TRUE	[INTERPRO, BLASTED, MAPPED, GO-SLIM]	DERPT_G10191	: Full=Alanine dehydrogenase 2	1094	20	0	59.72	10	C:GO:0005739; C:GO:0005886; F:GO:0016491; F:GO:0022857; F:GO:0022857; F:GO:0022857; P:GO:0034641; F:GO:0043167; P:GO:0044281; P:GO:0051186	C:mitochondrion; C:plasma membrane; F:oxidoreductase activity; F:transmembrane transporter activity; F:transmembrane transporter activity; F:transmembrane transporter activity; P:cellular nitrogen compound metabolic process; F:ion binding; P:small molecule metabolic process; P:cofactor metabolic process	EC:1.6.1.2; EC:1.6.1.1	NAD(P)(+) transhydrogenase (Re/Si-specific); NAD(P)(+) transhydrogenase (Si-specific)	IPR007698 (SMART); IPR007886 (SMART); IPR034300 (PFAM); IPR007886 (PFAM); IPR024605 (PFAM); G3DSA:3.40.50.1220 (GENE3D); G3DSA:3.40.50.720 (GENE3D); G3DSA:3.40.50.720 (GENE3D); IPR007698 (PFAM); IPR026255 (TIGRFAM); mobidb-lite (MOBIDB_LITE); PTHR10160 (PANTHER); TRANSMEMBRANE (PHOBIUS); TRANSMEMBRANE (PHOBIUS); NON_CYTOPLASMIC_DOMAIN (PHOBIUS); CYTOPLASMIC_DOMAIN (PHOBIUS); NON_CYTOPLASMIC_DOMAI…	F:GO:0008746; P:GO:0055114; P:GO:1902600	F:NAD(P)+ transhydrogenase activity; P:oxidation-reduction process; P:proton transmembrane transport
TRUE	[INTERPRO, BLASTED, MAPPED, GO-SLIM]	DERPT_G1386	: Full=NADH-cytochrome b5 reductase 2 Short=	641	20	6.23591e-114	73.25	12	C:GO:0005576; C:GO:0005634; C:GO:0005739; C:GO:0005783; P:GO:0006605; P:GO:0006629; P:GO:0007005; P:GO:0009058; P:GO:0009058; F:GO:0016491; F:GO:0043167; P:GO:0044281	C:extracellular region; C:nucleus; C:mitochondrion; C:endoplasmic reticulum; P:protein targeting; P:lipid metabolic process; P:mitochondrion organization; P:biosynthetic process; P:biosynthetic process; F:oxidoreductase activity; F:ion binding; P:small molecule metabolic process	EC:1.6.2.2	Cytochrome-b5 reductase	IPR001834 (PRINTS); IPR001709 (PRINTS); G3DSA:2.40.30.10 (GENE3D); IPR001433 (PFAM); G3DSA:3.40.50.80 (GENE3D); G3DSA:3.40.50.80 (GENE3D); IPR008333 (PFAM); PTHR19370:SF108 (PANTHER); PTHR19370 (PANTHER); PTHR19370 (PANTHER); PTHR19370:SF108 (PANTHER); CYTOPLASMIC_DOMAIN (PHOBIUS); NON_CYTOPLASMIC_DOMAIN (PHOBIUS); TRANSMEMBRANE (PHOBIUS); TRANSMEMBRANE (PHOBIUS); CYTOPLASMIC_DOMAIN (PHOBIUS); TR…	F:GO:0016491; P:GO:0055114	F:oxidoreductase activity; P:oxidation-reduction process
TRUE	[INTERPRO, BLASTED, MAPPED, GO-SLIM]	DERPT_G10299	: Full=NADPH-dependent diflavin oxidoreductase 1 ame: Full=NADPH-dependent FMN and FAD-containing oxidoreductase	630	20	3.11223e-152	51.25	6	C:GO:0005634; C:GO:0005829; C:GO:0005856; P:GO:0008219; F:GO:0016491; F:GO:0043167	C:nucleus; C:cytosol; C:cytoskeleton; P:cell death; F:oxidoreductase activity; F:ion binding	EC:1.6.2.4	NADPH--hemoprotein reductase	IPR001709 (PRINTS); IPR001094 (PRINTS); IPR008254 (PFAM); IPR001433 (PFAM); G3DSA:2.40.30.10 (GENE3D); G3DSA:3.40.50.80 (GENE3D); IPR029039 (G3DSA:3.40.50.GENE3D); IPR023173 (G3DSA:1.20.990.GENE3D); IPR003097 (PFAM); PTHR19384 (PANTHER); PTHR19384:SF10 (PANTHER); IPR028879 (HAMAP); IPR008254 (PROSITE_PROFILES); IPR017927 (PROSITE_PROFILES); IPR017938 (SUPERFAMILY); IPR029039 (SUPERFAMILY); SSF523…	F:GO:0003958; F:GO:0010181; F:GO:0016491; P:GO:0055114	F:NADPH-hemoprotein reductase activity; F:FMN binding; F:oxidoreductase activity; P:oxidation-reduction process
TRUE	[INTERPRO, BLASTED, MAPPED, GO-SLIM]	DERPT_G10150	: Full=NADPH--cytochrome P450 reductase Short=CPR Short=P450R	678	20	0	65.72	20	C:GO:0005739; C:GO:0005783; C:GO:0005811; P:GO:0006464; P:GO:0006629; P:GO:0007165; P:GO:0008219; P:GO:0008283; P:GO:0009056; P:GO:0009056; P:GO:0009058; P:GO:0009058; F:GO:0016491; F:GO:0019899; P:GO:0030154; P:GO:0034641; P:GO:0040007; F:GO:0043167; P:GO:0044281; P:GO:0048856	C:mitochondrion; C:endoplasmic reticulum; C:lipid droplet; P:cellular protein modification process; P:lipid metabolic process; P:signal transduction; P:cell death; P:cell proliferation; P:catabolic process; P:catabolic process; P:biosynthetic process; P:biosynthetic process; F:oxidoreductase activity; F:enzyme binding; P:cell differentiation; P:cellular nitrogen compound metabolic process; P:grow…	EC:1.6.2.4; EC:1.14.12; EC:1.97.1; EC:1.14.12.17; EC:1.6.2.2; EC:1.16.1; EC:1.16.1.8; EC:1.9.99.1	NADPH--hemoprotein reductase; Acting on paired donors, with incorporation or reduction of molecular oxygen. The oxygen incorporated need not be derived from O(2); Other oxidoreductases; Nitric oxide dioxygenase; Cytochrome-b5 reductase; Oxidizing metal ions; [Methionine synthase] reductase; Acting on a heme group of donors	IPR001094 (PRINTS); IPR001709 (PRINTS); G3DSA:2.40.30.10 (GENE3D); IPR029039 (G3DSA:3.40.50.GENE3D); G3DSA:3.40.50.80 (GENE3D); IPR023173 (G3DSA:1.20.990.GENE3D); IPR001433 (PFAM); IPR023208 (PIRSF); IPR023173 (G3DSA:1.20.990.GENE3D); IPR003097 (PFAM); IPR008254 (PFAM); PTHR19384 (PANTHER); PTHR19384:SF17 (PANTHER); NON_CYTOPLASMIC_DOMAIN (PHOBIUS); CYTOPLASMIC_DOMAIN (PHOBIUS); TRANSMEMBRANE (PH…	F:GO:0003958; F:GO:0010181; F:GO:0016491; P:GO:0055114	F:NADPH-hemoprotein reductase activity; F:FMN binding; F:oxidoreductase activity; P:oxidation-reduction process
TRUE	[INTERPRO, BLASTED, MAPPED, MANUAL, GO-SLIM]	DERPT_G2468	Proposed Eur-Allergen, Allergen Homolog (Mal s 6, Cat r1, Asp f27, Sola 5): Full=Peptidyl-prolyl cis-trans isomerase H Short=PPIase H ame: Full=Rotamase H	176	20	1.93855e-69	72.49	33	P:GO:0000413; P:GO:0001932; F:GO:0003729; F:GO:0003755; F:GO:0003958; C:GO:0005741; C:GO:0005758; C:GO:0005774; C:GO:0005783; C:GO:0005794; C:GO:0005829; C:GO:0005886; P:GO:0006118; P:GO:0006457; P:GO:0006696; P:GO:0006810; P:GO:0006915; F:GO:0009055; C:GO:0009507; P:GO:0009585; P:GO:0009704; P:GO:0009735; P:GO:0009742; P:GO:0009785; F:GO:0016018; P:GO:0016575; P:GO:0030437; C:GO:0030445; C:GO:00…	P:protein peptidyl-prolyl isomerization; P:regulation of protein phosphorylation; F:mRNA binding; F:peptidyl-prolyl cis-trans isomerase activity; F:NADPH-hemoprotein reductase activity; C:mitochondrial outer membrane; C:mitochondrial intermembrane space; C:vacuolar membrane; C:endoplasmic reticulum; C:Golgi apparatus; C:cytosol; C:plasma membrane; P:obsolete electron transport; P:protein folding;…	EC:1.6.2.4; EC:5.2.1.8	NADPH--hemoprotein reductase; Peptidylprolyl isomerase	IPR002130 (PRINTS); IPR002130 (PFAM); IPR024936 (PIRSF); IPR029000 (G3DSA:2.40.100.GENE3D); IPR024936 (PANTHER); PTHR11071:SF263 (PANTHER); IPR020892 (PROSITE_PATTERNS); IPR002130 (PROSITE_PROFILES); IPR029000 (SUPERFAMILY)	P:GO:0000413; F:GO:0003755; P:GO:0006457	P:protein peptidyl-prolyl isomerization; F:peptidyl-prolyl cis-trans isomerase activity; P:protein folding
TRUE	[INTERPRO, BLASTED, MAPPED, GO-SLIM]	DERPT_G8690	: Full=Respiratory burst oxidase homolog B ame: Full=NADPH oxidase RBOHB Short=	1642	20	0	53.5	14	P:GO:0002376; C:GO:0005737; C:GO:0005886; P:GO:0006464; P:GO:0006950; P:GO:0007165; P:GO:0008219; P:GO:0009058; F:GO:0016491; P:GO:0021700; F:GO:0043167; C:GO:0043226; P:GO:0043473; P:GO:0048856	P:immune system process; C:cytoplasm; C:plasma membrane; P:cellular protein modification process; P:response to stress; P:signal transduction; P:cell death; P:biosynthetic process; F:oxidoreductase activity; P:developmental maturation; F:ion binding; C:organelle; P:pigmentation; P:anatomical structure development	EC:1.6.3.1; EC:1.11.1.7	NAD(P)H oxidase (H(2)O(2)-forming); Peroxidase	IPR019791 (PRINTS); IPR002048 (SMART); IPR013130 (PFAM); IPR013121 (PFAM); IPR002048 (PFAM); IPR002048 (PFAM); G3DSA:2.40.30.10 (GENE3D); IPR019791 (PFAM); IPR013112 (PFAM); IPR037120 (G3DSA:1.10.640.GENE3D); G3DSA:3.40.50.80 (GENE3D); G3DSA:1.10.238.10 (GENE3D),SFLDG01169 (SFLD); PTHR11972 (PANTHER); IPR029595 (PTHR11972:PANTHER); IPR018247 (PROSITE_PATTERNS); IPR018247 (PROSITE_PATTERNS); TRANS…	F:GO:0004601; F:GO:0005509; P:GO:0006979; F:GO:0016174; F:GO:0016491; F:GO:0020037; P:GO:0050665; P:GO:0055114	F:peroxidase activity; F:calcium ion binding; P:response to oxidative stress; F:NAD(P)H oxidase activity; F:oxidoreductase activity; F:heme binding; P:hydrogen peroxide biosynthetic process; P:oxidation-reduction process
TRUE	[INTERPRO, BLASTED, MAPPED, GO-SLIM]	DERPT_G7447	: Full=Respiratory burst oxidase homolog B ame: Full=NADPH oxidase RBOHB Short=	2298	20	0	51.21	11	P:GO:0002376; C:GO:0005737; C:GO:0005886; P:GO:0006950; P:GO:0007165; P:GO:0008219; P:GO:0009058; F:GO:0016491; F:GO:0043167; C:GO:0043226; P:GO:0048856	P:immune system process; C:cytoplasm; C:plasma membrane; P:response to stress; P:signal transduction; P:cell death; P:biosynthetic process; F:oxidoreductase activity; F:ion binding; C:organelle; P:anatomical structure development	EC:1.6.3.1; EC:1.11.1.7	NAD(P)H oxidase (H(2)O(2)-forming); Peroxidase	Coil (COILS); IPR019791 (PRINTS); IPR002048 (SMART); IPR000504 (SMART); G3DSA:3.40.50.80 (GENE3D); IPR037120 (G3DSA:1.10.640.GENE3D); IPR012677 (G3DSA:3.30.70.GENE3D); G3DSA:1.10.238.10 (GENE3D); IPR002048 (PFAM); IPR013130 (PFAM); IPR013121 (PFAM); IPR019791 (PFAM); IPR013112 (PFAM); G3DSA:1.20.5.170 (GENE3D); G3DSA:2.40.30.10 (GENE3D); IPR000504 (PFAM); mobidb-lite (MOBIDB_LITE); mobidb-lite (M…	F:GO:0003676; F:GO:0004601; F:GO:0005509; P:GO:0006979; F:GO:0016174; F:GO:0016491; F:GO:0020037; P:GO:0050665; P:GO:0055114	F:nucleic acid binding; F:peroxidase activity; F:calcium ion binding; P:response to oxidative stress; F:NAD(P)H oxidase activity; F:oxidoreductase activity; F:heme binding; P:hydrogen peroxide biosynthetic process; P:oxidation-reduction process
TRUE	[INTERPRO, BLASTED, MAPPED, GO-SLIM]	DERPT_G8449	: Full=3-phenylpropionate cinnamic acid dioxygenase ferredoxin--NAD(+) reductase component	595	20	6.813e-128	47.66	16	F:GO:0003677; C:GO:0005634; C:GO:0005739; C:GO:0005829; P:GO:0006091; P:GO:0006259; P:GO:0006950; P:GO:0007005; P:GO:0007165; P:GO:0008219; F:GO:0016491; P:GO:0030154; P:GO:0034655; F:GO:0043167; P:GO:0044281; P:GO:0048856	F:DNA binding; C:nucleus; C:mitochondrion; C:cytosol; P:generation of precursor metabolites and energy; P:DNA metabolic process; P:response to stress; P:mitochondrion organization; P:signal transduction; P:cell death; F:oxidoreductase activity; P:cell differentiation; P:nucleobase-containing compound catabolic process; F:ion binding; P:small molecule metabolic process; P:anatomical structure deve…	EC:1.6.3.1; EC:1.5.5.1	NAD(P)H oxidase (H(2)O(2)-forming); Electron-transferring-flavoprotein dehydrogenase	PR00368 (PRINTS); PR00411 (PRINTS); SM01353 (SMART); IPR016156 (G3DSA:3.30.390.GENE3D); IPR029324 (PFAM); IPR023753 (PFAM); IPR036188 (G3DSA:3.50.50.GENE3D); IPR036188 (G3DSA:3.50.50.GENE3D); PTHR43557 (PANTHER); PTHR43557:SF4 (PANTHER); NON_CYTOPLASMIC_DOMAIN (PHOBIUS); CYTOPLASMIC_DOMAIN (PHOBIUS); TRANSMEMBRANE (PHOBIUS); IPR036188 (SUPERFAMILY); IPR016156 (SUPERFAMILY); IPR036188 (SUPERFAMILY…	F:GO:0016491; F:GO:0046983; F:GO:0050660; P:GO:0055114	F:oxidoreductase activity; F:protein dimerization activity; F:flavin adenine dinucleotide binding; P:oxidation-reduction process
TRUE	[INTERPRO, BLASTED, MAPPED, GO-SLIM]	DERPT_G9862	: Full=NADH dehydrogenase	416	14	4.94901e-72	51.2	6	C:GO:0005739; P:GO:0006091; F:GO:0016491; C:GO:0032991; P:GO:0034641; P:GO:0044281	C:mitochondrion; P:generation of precursor metabolites and energy; F:oxidoreductase activity; C:protein-containing complex; P:cellular nitrogen compound metabolic process; P:small molecule metabolic process	EC:1.6.99.3	NADH dehydrogenase	IPR015828 (PIRSF); G3DSA:3.40.50.300 (GENE3D); IPR031314 (PFAM); PTHR10513 (PANTHER); PTHR10513:SF15 (PANTHER); IPR027417 (SUPERFAMILY)	C:GO:0005747; P:GO:0006120	C:mitochondrial respiratory chain complex I; P:mitochondrial electron transport, NADH to ubiquinone
TRUE	[INTERPRO, BLASTED, MAPPED, GO-SLIM]	DERPT_G3763	: Full=NADH dehydrogenase	421	10	3.44868e-73	58.29	6	C:GO:0005654; C:GO:0005739; P:GO:0006950; F:GO:0016491; C:GO:0032991; P:GO:0044281	C:nucleoplasm; C:mitochondrion; P:response to stress; F:oxidoreductase activity; C:protein-containing complex; P:small molecule metabolic process	EC:1.6.99.3	NADH dehydrogenase	IPR016040 (PFAM); G3DSA:3.40.50.720 (GENE3D); PTHR12126:SF7 (PANTHER); PTHR12126 (PANTHER); cd05271 (CDD); IPR036291 (SUPERFAMILY)	no GO terms	no GO terms
TRUE	[INTERPRO, BLASTED, MAPPED, GO-SLIM]	DERPT_G10940	: Full=NADH dehydrogenase	190	10	7.74372e-45	67.12	17	C:GO:0005739; P:GO:0006091; P:GO:0006464; P:GO:0006810; P:GO:0006810; P:GO:0007005; P:GO:0007165; P:GO:0008283; P:GO:0009058; P:GO:0009058; F:GO:0016491; C:GO:0032991; P:GO:0034641; P:GO:0044281; P:GO:0048856; P:GO:0051186; P:GO:0065003	C:mitochondrion; P:generation of precursor metabolites and energy; P:cellular protein modification process; P:transport; P:transport; P:mitochondrion organization; P:signal transduction; P:cell proliferation; P:biosynthetic process; P:biosynthetic process; F:oxidoreductase activity; C:protein-containing complex; P:cellular nitrogen compound metabolic process; P:small molecule metabolic process; P…	EC:1.6.99.5; EC:1.16.1; EC:1.16.1.7; EC:1.6.99.3; EC:1.6.5.3	Acting on NADH or NADPH; Oxidizing metal ions; Ferric-chelate reductase (NADH); NADH dehydrogenase; NADH:ubiquinone reductase (H(+)-translocating)	IPR006885 (PFAM); IPR038532 (G3DSA:3.30.160.GENE3D); IPR006885 (PANTHER); PTHR12219:SF8 (PANTHER)	F:GO:0016651; P:GO:0022900	F:oxidoreductase activity, acting on NAD(P)H; P:electron transport chain
TRUE	[INTERPRO, BLASTED, MAPPED, GO-SLIM]	DERPT_G934	: Full=NADH dehydrogenase	210	20	1.97142e-103	83.89	17	C:GO:0005739; C:GO:0005886; P:GO:0006091; P:GO:0006810; P:GO:0006810; P:GO:0006950; P:GO:0007005; P:GO:0009058; P:GO:0009058; F:GO:0016491; C:GO:0032991; P:GO:0034641; F:GO:0043167; P:GO:0044281; P:GO:0048856; P:GO:0051186; P:GO:0065003	C:mitochondrion; C:plasma membrane; P:generation of precursor metabolites and energy; P:transport; P:transport; P:response to stress; P:mitochondrion organization; P:biosynthetic process; P:biosynthetic process; F:oxidoreductase activity; C:protein-containing complex; P:cellular nitrogen compound metabolic process; F:ion binding; P:small molecule metabolic process; P:anatomical structure developm…	EC:1.6.99.5; EC:1.6.99.3; EC:1.6.5.3	Acting on NADH or NADPH; NADH dehydrogenase; NADH:ubiquinone reductase (H(+)-translocating)	IPR017896 (PFAM); G3DSA:3.30.70.3270 (GENE3D); IPR010226 (TIGRFAM); PTHR10849 (PANTHER); PTHR10849:SF20 (PANTHER); IPR017900 (PROSITE_PATTERNS); IPR017900 (PROSITE_PATTERNS); IPR017896 (PROSITE_PROFILES); IPR017896 (PROSITE_PROFILES); IPR010226 (HAMAP); SSF54862 (SUPERFAMILY)	C:GO:0016020; F:GO:0016651; F:GO:0051539; P:GO:0055114	C:membrane; F:oxidoreductase activity, acting on NAD(P)H; F:4 iron, 4 sulfur cluster binding; P:oxidation-reduction process
TRUE	[INTERPRO, BLASTED, MAPPED, GO-SLIM]	DERPT_G8283	: Full=NADH dehydrogenase	164	9	9.73814e-16	56.19	14	C:GO:0005634; C:GO:0005739; P:GO:0006091; P:GO:0006810; P:GO:0006810; P:GO:0007165; P:GO:0008219; P:GO:0009058; P:GO:0009058; F:GO:0016491; C:GO:0032991; P:GO:0034641; P:GO:0044281; P:GO:0051186	C:nucleus; C:mitochondrion; P:generation of precursor metabolites and energy; P:transport; P:transport; P:signal transduction; P:cell death; P:biosynthetic process; P:biosynthetic process; F:oxidoreductase activity; C:protein-containing complex; P:cellular nitrogen compound metabolic process; P:small molecule metabolic process; P:cofactor metabolic process	EC:1.6.99.5; EC:1.6.99.3; EC:1.6.5.3	Acting on NADH or NADPH; NADH dehydrogenase; NADH:ubiquinone reductase (H(+)-translocating)	IPR009346 (PFAM); IPR009346 (PANTHER); NON_CYTOPLASMIC_DOMAIN (PHOBIUS); CYTOPLASMIC_DOMAIN (PHOBIUS); TRANSMEMBRANE (PHOBIUS); TMhelix (TMHMM)	no GO terms	no GO terms
TRUE	[INTERPRO, BLASTED, MAPPED, GO-SLIM]	DERPT_G7490	: Full=NADH-ubiquinone oxidoreductase 75 kDa mitochondrial ame: Full=Complex I-75kD Short=CI-75kD Flags: Precursor	747	20	0	66.17	16	C:GO:0005739; P:GO:0006091; P:GO:0006810; P:GO:0006810; P:GO:0006950; P:GO:0007005; P:GO:0008219; P:GO:0009058; P:GO:0009058; C:GO:0009536; F:GO:0016491; C:GO:0032991; P:GO:0034641; P:GO:0044281; P:GO:0050877; P:GO:0051186	C:mitochondrion; P:generation of precursor metabolites and energy; P:transport; P:transport; P:response to stress; P:mitochondrion organization; P:cell death; P:biosynthetic process; P:biosynthetic process; C:plastid; F:oxidoreductase activity; C:protein-containing complex; P:cellular nitrogen compound metabolic process; P:small molecule metabolic process; P:nervous system process; P:cofactor met…	EC:1.6.99.5; EC:1.6.99.3; EC:1.6.5.3	Acting on NADH or NADPH; NADH dehydrogenase; NADH:ubiquinone reductase (H(+)-translocating)	IPR019574 (SMART); G3DSA:3.30.70.20 (GENE3D); IPR006656 (PFAM); PF13510 (PFAM); IPR019574 (PFAM); G3DSA:3.10.20.740 (GENE3D); IPR015405 (PFAM); IPR010228 (TIGRFAM); PTHR11615 (PANTHER); PTHR11615:SF115 (PANTHER); IPR000283 (PROSITE_PATTERNS); IPR000283 (PROSITE_PATTERNS); IPR000283 (PROSITE_PATTERNS); IPR019574 (PROSITE_PROFILES); IPR001041 (PROSITE_PROFILES); IPR006963 (PROSITE_PROFILES); IPR001…	F:GO:0008137; F:GO:0009055; C:GO:0016020; F:GO:0016491; F:GO:0016651; P:GO:0042773; F:GO:0051536; P:GO:0055114	F:NADH dehydrogenase (ubiquinone) activity; F:electron transfer activity; C:membrane; F:oxidoreductase activity; F:oxidoreductase activity, acting on NAD(P)H; P:ATP synthesis coupled electron transport; F:iron-sulfur cluster binding; P:oxidation-reduction process
TRUE	[INTERPRO, BLASTED, MAPPED, GO-SLIM]	DERPT_G7437	: Full=NADH dehydrogenase	116	10	2.42601e-36	63.95	12	C:GO:0005739; P:GO:0006091; P:GO:0006810; P:GO:0006810; P:GO:0009058; P:GO:0009058; C:GO:0009536; F:GO:0016491; C:GO:0032991; P:GO:0034641; P:GO:0044281; P:GO:0051186	C:mitochondrion; P:generation of precursor metabolites and energy; P:transport; P:transport; P:biosynthetic process; P:biosynthetic process; C:plastid; F:oxidoreductase activity; C:protein-containing complex; P:cellular nitrogen compound metabolic process; P:small molecule metabolic process; P:cofactor metabolic process	EC:1.6.99.5; EC:1.6.99.3; EC:1.6.5.3	Acting on NADH or NADPH; NADH dehydrogenase; NADH:ubiquinone reductase (H(+)-translocating)	IPR006806 (PFAM); PTHR12653 (PANTHER)	C:GO:0005743; F:GO:0016651; P:GO:0022904	C:mitochondrial inner membrane; F:oxidoreductase activity, acting on NAD(P)H; P:respiratory electron transport chain
TRUE	[INTERPRO, BLASTED, MAPPED, GO-SLIM]	DERPT_G7354	: Full=NADH dehydrogenase	235	20	6.41228e-103	84.89	19	P:GO:0000003; C:GO:0005739; C:GO:0005886; P:GO:0006091; P:GO:0006810; P:GO:0006810; P:GO:0007005; P:GO:0009058; P:GO:0009058; P:GO:0009790; F:GO:0016491; F:GO:0019899; C:GO:0032991; P:GO:0034641; P:GO:0040007; F:GO:0043167; P:GO:0044281; P:GO:0051186; P:GO:0065003	P:reproduction; C:mitochondrion; C:plasma membrane; P:generation of precursor metabolites and energy; P:transport; P:transport; P:mitochondrion organization; P:biosynthetic process; P:biosynthetic process; P:embryo development; F:oxidoreductase activity; F:enzyme binding; C:protein-containing complex; P:cellular nitrogen compound metabolic process; P:growth; F:ion binding; P:small molecule metabo…	EC:1.6.99.5; EC:1.6.99.3; EC:1.6.5.3	Acting on NADH or NADPH; NADH dehydrogenase; NADH:ubiquinone reductase (H(+)-translocating)	G3DSA:3.40.50.12280 (GENE3D); IPR006138 (TIGRFAM); IPR006137 (PFAM); PTHR11995:SF19 (PANTHER); PTHR11995 (PANTHER); IPR006138 (PROSITE_PATTERNS); IPR006138 (HAMAP); SSF56770 (SUPERFAMILY)	F:GO:0008137; F:GO:0048038; F:GO:0051536; F:GO:0051539; P:GO:0055114	F:NADH dehydrogenase (ubiquinone) activity; F:quinone binding; F:iron-sulfur cluster binding; F:4 iron, 4 sulfur cluster binding; P:oxidation-reduction process
TRUE	[INTERPRO, BLASTED, MAPPED, GO-SLIM]	DERPT_G6954	: Full=NADH-quinone oxidoreductase subunit C ame: Full=NADH dehydrogenase I subunit C ame: Full=NDH-1 subunit C	270	20	4.44337e-100	72.73	18	C:GO:0005634; C:GO:0005739; P:GO:0006091; P:GO:0006810; P:GO:0006810; P:GO:0007005; P:GO:0007165; P:GO:0008219; P:GO:0009058; P:GO:0009058; F:GO:0016491; C:GO:0032991; P:GO:0034641; P:GO:0040007; P:GO:0044281; P:GO:0048856; P:GO:0051186; P:GO:0065003	C:nucleus; C:mitochondrion; P:generation of precursor metabolites and energy; P:transport; P:transport; P:mitochondrion organization; P:signal transduction; P:cell death; P:biosynthetic process; P:biosynthetic process; F:oxidoreductase activity; C:protein-containing complex; P:cellular nitrogen compound metabolic process; P:growth; P:small molecule metabolic process; P:anatomical structure develo…	EC:1.6.99.5; EC:1.6.99.3; EC:1.6.5.3	Acting on NADH or NADPH; NADH dehydrogenase; NADH:ubiquinone reductase (H(+)-translocating)	IPR037232 (G3DSA:3.30.460.GENE3D); IPR001268 (PFAM); IPR010218 (TIGRFAM); PTHR10884 (PANTHER); PTHR10884:SF10 (PANTHER); IPR020396 (PROSITE_PATTERNS); IPR001268 (PRODOM); IPR010218 (HAMAP); IPR037232 (SUPERFAMILY)	F:GO:0008137; F:GO:0016651; P:GO:0055114	F:NADH dehydrogenase (ubiquinone) activity; F:oxidoreductase activity, acting on NAD(P)H; P:oxidation-reduction process
TRUE	[INTERPRO, BLASTED, MAPPED, GO-SLIM]	DERPT_G600	: Full=NADH dehydrogenase	792	20	0	81.58	16	C:GO:0005654; C:GO:0005739; P:GO:0006091; P:GO:0006810; P:GO:0006810; P:GO:0006950; P:GO:0009058; P:GO:0009058; F:GO:0016491; F:GO:0019899; C:GO:0032991; P:GO:0034641; F:GO:0043167; P:GO:0044281; P:GO:0048856; P:GO:0051186	C:nucleoplasm; C:mitochondrion; P:generation of precursor metabolites and energy; P:transport; P:transport; P:response to stress; P:biosynthetic process; P:biosynthetic process; F:oxidoreductase activity; F:enzyme binding; C:protein-containing complex; P:cellular nitrogen compound metabolic process; F:ion binding; P:small molecule metabolic process; P:anatomical structure development; P:cofactor …	EC:1.6.99.5; EC:1.6.99.3; EC:1.6.5.3	Acting on NADH or NADPH; NADH dehydrogenase; NADH:ubiquinone reductase (H(+)-translocating)	IPR001135 (PFAM); IPR022885 (TIGRFAM); IPR001926 (PFAM); IPR038290 (G3DSA:1.10.645.GENE3D); G3DSA:3.40.50.1100 (GENE3D); G3DSA:3.40.50.1100 (GENE3D); PTHR11993:SF10 (PANTHER); PTHR11993 (PANTHER); IPR000634 (PROSITE_PATTERNS); IPR014029 (PROSITE_PATTERNS); IPR022885 (HAMAP); IPR029014 (SUPERFAMILY); IPR036052 (SUPERFAMILY)	P:GO:0006520; F:GO:0016651; F:GO:0030170; F:GO:0048038; F:GO:0051287; P:GO:0055114	P:cellular amino acid metabolic process; F:oxidoreductase activity, acting on NAD(P)H; F:pyridoxal phosphate binding; F:quinone binding; F:NAD binding; P:oxidation-reduction process
TRUE	[INTERPRO, BLASTED, MAPPED, GO-SLIM]	DERPT_G5710	: Full=KH domain-containing akap-1	1074	4	1.22242e-44	50.61	12	F:GO:0003723; C:GO:0005739; P:GO:0006091; P:GO:0006810; P:GO:0006810; P:GO:0007165; P:GO:0009058; P:GO:0009058; F:GO:0016491; P:GO:0034641; P:GO:0044281; P:GO:0051186	F:RNA binding; C:mitochondrion; P:generation of precursor metabolites and energy; P:transport; P:transport; P:signal transduction; P:biosynthetic process; P:biosynthetic process; F:oxidoreductase activity; P:cellular nitrogen compound metabolic process; P:small molecule metabolic process; P:cofactor metabolic process	EC:1.6.99.5; EC:1.6.99.3; EC:1.6.5.3	Acting on NADH or NADPH; NADH dehydrogenase; NADH:ubiquinone reductase (H(+)-translocating)	IPR002999 (SMART); IPR004087 (SMART); G3DSA:2.30.30.140 (GENE3D); IPR002999 (PFAM); IPR035437 (G3DSA:2.40.50.GENE3D); IPR004088 (PFAM); IPR036612 (G3DSA:3.30.1370.GENE3D); IPR009947 (PFAM); mobidb-lite (MOBIDB_LITE); mobidb-lite (MOBIDB_LITE); mobidb-lite (MOBIDB_LITE); PTHR22948 (PANTHER); IPR033104 (PTHR22948:PANTHER); CYTOPLASMIC_DOMAIN (PHOBIUS); TRANSMEMBRANE (PHOBIUS); NON_CYTOPLASMIC_DOMAI…	F:GO:0003676; F:GO:0003723; C:GO:0005739; C:GO:0005743; F:GO:0008137; P:GO:0010738; F:GO:0034237; P:GO:0042773	F:nucleic acid binding; F:RNA binding; C:mitochondrion; C:mitochondrial inner membrane; F:NADH dehydrogenase (ubiquinone) activity; P:regulation of protein kinase A signaling; F:protein kinase A regulatory subunit binding; P:ATP synthesis coupled electron transport
TRUE	[INTERPRO, BLASTED, MAPPED, GO-SLIM]	DERPT_G3679	: Full=NADH dehydrogenase	149	12	1.03597e-48	58.79	13	C:GO:0005739; P:GO:0006091; P:GO:0006810; P:GO:0006810; P:GO:0006950; P:GO:0009058; P:GO:0009058; F:GO:0016491; C:GO:0032991; P:GO:0034641; F:GO:0043167; P:GO:0044281; P:GO:0051186	C:mitochondrion; P:generation of precursor metabolites and energy; P:transport; P:transport; P:response to stress; P:biosynthetic process; P:biosynthetic process; F:oxidoreductase activity; C:protein-containing complex; P:cellular nitrogen compound metabolic process; F:ion binding; P:small molecule metabolic process; P:cofactor metabolic process	EC:1.6.99.5; EC:1.6.99.3; EC:1.6.5.3	Acting on NADH or NADPH; NADH dehydrogenase; NADH:ubiquinone reductase (H(+)-translocating)	IPR007763 (PFAM); IPR007763 (PANTHER); PTHR12910:SF2 (PANTHER)	F:GO:0008137; F:GO:0009055; C:GO:0016020	F:NADH dehydrogenase (ubiquinone) activity; F:electron transfer activity; C:membrane
TRUE	[INTERPRO, BLASTED, MAPPED, GO-SLIM]	DERPT_G3343	: Full=NADH dehydrogenase	495	20	0	85.32	12	C:GO:0005739; P:GO:0006091; P:GO:0006810; P:GO:0006810; P:GO:0009058; P:GO:0009058; F:GO:0016491; C:GO:0032991; P:GO:0034641; F:GO:0043167; P:GO:0044281; P:GO:0051186	C:mitochondrion; P:generation of precursor metabolites and energy; P:transport; P:transport; P:biosynthetic process; P:biosynthetic process; F:oxidoreductase activity; C:protein-containing complex; P:cellular nitrogen compound metabolic process; F:ion binding; P:small molecule metabolic process; P:cofactor metabolic process	EC:1.6.99.5; EC:1.6.99.3; EC:1.6.5.3	Acting on NADH or NADPH; NADH dehydrogenase; NADH:ubiquinone reductase (H(+)-translocating)	IPR019575 (SMART); IPR019575 (PFAM); IPR011537 (TIGRFAM); IPR037225 (G3DSA:3.40.50.GENE3D); IPR011538 (PFAM); IPR037207 (G3DSA:1.20.1440.GENE3D); G3DSA:3.10.20.600 (GENE3D); IPR019554 (PFAM); PTHR11780:SF10 (PANTHER); PTHR11780 (PANTHER); IPR001949 (PROSITE_PATTERNS); IPR001949 (PROSITE_PATTERNS); NON_CYTOPLASMIC_DOMAIN (PHOBIUS); CYTOPLASMIC_DOMAIN (PHOBIUS); TRANSMEMBRANE (PHOBIUS); IPR037207 (…	F:GO:0008137; F:GO:0010181; F:GO:0016651; F:GO:0051287; F:GO:0051539; P:GO:0055114	F:NADH dehydrogenase (ubiquinone) activity; F:FMN binding; F:oxidoreductase activity, acting on NAD(P)H; F:NAD binding; F:4 iron, 4 sulfur cluster binding; P:oxidation-reduction process
TRUE	[INTERPRO, BLASTED, MAPPED, GO-SLIM]	DERPT_G3241	: Full=NADH dehydrogenase	130	8	6.1466e-21	59.79	13	C:GO:0005739; P:GO:0006091; P:GO:0006810; P:GO:0006810; P:GO:0007005; P:GO:0009058; P:GO:0009058; F:GO:0016491; C:GO:0032991; P:GO:0034641; P:GO:0044281; P:GO:0051186; P:GO:0065003	C:mitochondrion; P:generation of precursor metabolites and energy; P:transport; P:transport; P:mitochondrion organization; P:biosynthetic process; P:biosynthetic process; F:oxidoreductase activity; C:protein-containing complex; P:cellular nitrogen compound metabolic process; P:small molecule metabolic process; P:cofactor metabolic process; P:protein-containing complex assembly	EC:1.6.99.5; EC:1.6.99.3; EC:1.6.5.3	Acting on NADH or NADPH; NADH dehydrogenase; NADH:ubiquinone reductase (H(+)-translocating)	Coil (COILS); IPR008698 (PFAM); IPR008698 (PANTHER)	F:GO:0003954; C:GO:0005739; F:GO:0008137	F:NADH dehydrogenase activity; C:mitochondrion; F:NADH dehydrogenase (ubiquinone) activity
TRUE	[INTERPRO, BLASTED, MAPPED, GO-SLIM]	DERPT_G1704	: Full=NADH dehydrogenase	687	20	8.91881e-86	68.98	16	F:GO:0003735; C:GO:0005739; C:GO:0005840; C:GO:0005886; P:GO:0006091; P:GO:0006412; P:GO:0006810; P:GO:0006810; P:GO:0006950; F:GO:0016491; C:GO:0032991; P:GO:0042254; F:GO:0043167; P:GO:0044281; P:GO:0048856; P:GO:0051186	F:structural constituent of ribosome; C:mitochondrion; C:ribosome; C:plasma membrane; P:generation of precursor metabolites and energy; P:translation; P:transport; P:transport; P:response to stress; F:oxidoreductase activity; C:protein-containing complex; P:ribosome biogenesis; F:ion binding; P:small molecule metabolic process; P:anatomical structure development; P:cofactor metabolic process	EC:1.6.99.5; EC:1.6.99.3; EC:1.6.5.3	Acting on NADH or NADPH; NADH dehydrogenase; NADH:ubiquinone reductase (H(+)-translocating)	IPR001865 (PFAM); IPR000618 (PFAM); G3DSA:1.10.10.1590 (GENE3D); PF01257 (PFAM); G3DSA:3.40.30.10 (GENE3D); G3DSA:3.40.50.10490 (GENE3D); IPR002023 (TIGRFAM); mobidb-lite (MOBIDB_LITE); IPR002023 (PANTHER); PTHR10371:SF3 (PANTHER); IPR031311 (PROSITE_PATTERNS); IPR018130 (PROSITE_PATTERNS); SIGNAL_PEPTIDE_N_REGION (PHOBIUS); NON_CYTOPLASMIC_DOMAIN (PHOBIUS); SIGNAL_PEPTIDE_C_REGION (PHOBIUS); SIG…	F:GO:0003735; C:GO:0005622; C:GO:0005840; P:GO:0006412; C:GO:0015935; F:GO:0016491; F:GO:0042302; P:GO:0055114	F:structural constituent of ribosome; C:intracellular; C:ribosome; P:translation; C:small ribosomal subunit; F:oxidoreductase activity; F:structural constituent of cuticle; P:oxidation-reduction process
TRUE	[INTERPRO, BLASTED, MAPPED, GO-SLIM]	DERPT_G10951	: Full=NADH dehydrogenase	179	7	1.58112e-21	54.51	10	C:GO:0005739; P:GO:0006091; P:GO:0006810; P:GO:0006810; P:GO:0009058; P:GO:0009058; F:GO:0016491; P:GO:0034641; P:GO:0044281; P:GO:0051186	C:mitochondrion; P:generation of precursor metabolites and energy; P:transport; P:transport; P:biosynthetic process; P:biosynthetic process; F:oxidoreductase activity; P:cellular nitrogen compound metabolic process; P:small molecule metabolic process; P:cofactor metabolic process	EC:1.6.99.5; EC:1.6.99.3; EC:1.6.5.3	Acting on NADH or NADPH; NADH dehydrogenase; NADH:ubiquinone reductase (H(+)-translocating)	IPR008699 (PFAM); IPR008699 (PANTHER); CYTOPLASMIC_DOMAIN (PHOBIUS); TRANSMEMBRANE (PHOBIUS); NON_CYTOPLASMIC_DOMAIN (PHOBIUS); TMhelix (TMHMM)	F:GO:0003954; C:GO:0005739; F:GO:0008137	F:NADH dehydrogenase activity; C:mitochondrion; F:NADH dehydrogenase (ubiquinone) activity
TRUE	[INTERPRO, NO-BLAST, GO-SLIM]	DERPT_G4882	---NA---	182				10	C:GO:0005739; P:GO:0006091; P:GO:0006810; P:GO:0006810; P:GO:0009058; P:GO:0009058; F:GO:0016491; P:GO:0034641; P:GO:0044281; P:GO:0051186	C:mitochondrion; P:generation of precursor metabolites and energy; P:transport; P:transport; P:biosynthetic process; P:biosynthetic process; F:oxidoreductase activity; P:cellular nitrogen compound metabolic process; P:small molecule metabolic process; P:cofactor metabolic process	EC:1.6.99.5; EC:1.6.99.3; EC:1.6.5.3	Acting on NADH or NADPH; NADH dehydrogenase; NADH:ubiquinone reductase (H(+)-translocating)	IPR009423 (PFAM); TRANSMEMBRANE (PHOBIUS); NON_CYTOPLASMIC_DOMAIN (PHOBIUS); CYTOPLASMIC_DOMAIN (PHOBIUS); TRANSMEMBRANE (PHOBIUS); CYTOPLASMIC_DOMAIN (PHOBIUS); TMhelix (TMHMM)	C:GO:0005743; P:GO:0006120; F:GO:0008137	C:mitochondrial inner membrane; P:mitochondrial electron transport, NADH to ubiquinone; F:NADH dehydrogenase (ubiquinone) activity
TRUE	[INTERPRO, BLASTED, MAPPED, GO-SLIM]	DERPT_G5389	: Full=GMP reductase ame: Full=Guanosine 5 -monophosphate oxidoreductase Short=Guanosine monophosphate reductase	350	20	0	82.19	9	P:GO:0002376; C:GO:0005737; P:GO:0009790; F:GO:0016491; P:GO:0030154; P:GO:0034655; P:GO:0040007; F:GO:0043167; P:GO:0044281	P:immune system process; C:cytoplasm; P:embryo development; F:oxidoreductase activity; P:cell differentiation; P:nucleobase-containing compound catabolic process; P:growth; F:ion binding; P:small molecule metabolic process	EC:1.7.1.7	GMP reductase	SM01240 (SMART); IPR005993 (TIGRFAM); IPR001093 (PFAM); IPR005993 (PIRSF); IPR013785 (G3DSA:3.20.20.GENE3D); PTHR43170 (PANTHER); PTHR43170:SF3 (PANTHER); IPR015875 (PROSITE_PATTERNS); IPR005993 (HAMAP); IPR001093 (CDD); SSF51412 (SUPERFAMILY)	F:GO:0003824; F:GO:0003920; P:GO:0009117; F:GO:0016491; P:GO:0055114; C:GO:1902560	F:catalytic activity; F:GMP reductase activity; P:nucleotide metabolic process; F:oxidoreductase activity; P:oxidation-reduction process; C:GMP reductase complex
TRUE	[INTERPRO, BLASTED, MAPPED, GO-SLIM]	DERPT_G3520	: Full=Dihydrolipoyl mitochondrial ame: Full=Dihydrolipoamide dehydrogenase Flags: Precursor	512	20	0	78.32	32	P:GO:0000003; C:GO:0005576; C:GO:0005654; C:GO:0005739; C:GO:0005773; C:GO:0005794; C:GO:0005929; P:GO:0005975; P:GO:0005975; P:GO:0006091; P:GO:0006520; P:GO:0006629; P:GO:0006790; P:GO:0007568; P:GO:0009056; P:GO:0009056; P:GO:0009058; P:GO:0009058; C:GO:0009536; P:GO:0009790; P:GO:0016192; F:GO:0016491; P:GO:0021700; P:GO:0030154; C:GO:0031410; C:GO:0032991; P:GO:0034641; P:GO:0040011; P:GO:00…	P:reproduction; C:extracellular region; C:nucleoplasm; C:mitochondrion; C:vacuole; C:Golgi apparatus; C:cilium; P:carbohydrate metabolic process; P:carbohydrate metabolic process; P:generation of precursor metabolites and energy; P:cellular amino acid metabolic process; P:lipid metabolic process; P:sulfur compound metabolic process; P:aging; P:catabolic process; P:catabolic process; P:biosyntheti…	EC:1.8.1.4; EC:1.2.4.2; EC:1.4.4.2	Dihydrolipoyl dehydrogenase; Oxoglutarate dehydrogenase (succinyl-transferring); Glycine dehydrogenase (aminomethyl-transferring)	PR00411 (PRINTS); PR00368 (PRINTS); IPR036188 (G3DSA:3.50.50.GENE3D); IPR006258 (TIGRFAM); IPR036188 (G3DSA:3.50.50.GENE3D); IPR004099 (PFAM); IPR023753 (PFAM); IPR001100 (PIRSF); IPR016156 (G3DSA:3.30.390.GENE3D); PTHR22912 (PANTHER); PTHR22912:SF151 (PANTHER); IPR012999 (PROSITE_PATTERNS); IPR016156 (SUPERFAMILY); IPR036188 (SUPERFAMILY)	F:GO:0004148; F:GO:0009055; F:GO:0016491; F:GO:0016668; P:GO:0045454; F:GO:0050660; P:GO:0055114	F:dihydrolipoyl dehydrogenase activity; F:electron transfer activity; F:oxidoreductase activity; F:oxidoreductase activity, acting on a sulfur group of donors, NAD(P) as acceptor; P:cell redox homeostasis; F:flavin adenine dinucleotide binding; P:oxidation-reduction process
TRUE	[INTERPRO, BLASTED, MAPPED, GO-SLIM]	DERPT_G2871	: Full=Thioredoxin reductase cytoplasmic Short=TR ame: Full=Thioredoxin reductase TR1	677	20	1.02409e-170	59.5	23	P:GO:0002376; C:GO:0005634; C:GO:0005739; C:GO:0005829; C:GO:0005856; P:GO:0005975; P:GO:0005975; P:GO:0006790; P:GO:0006950; P:GO:0007568; P:GO:0008283; P:GO:0009058; P:GO:0009058; P:GO:0009790; F:GO:0016491; P:GO:0030154; C:GO:0032991; P:GO:0034641; P:GO:0042592; F:GO:0043167; P:GO:0044281; P:GO:0048646; P:GO:0050877	P:immune system process; C:nucleus; C:mitochondrion; C:cytosol; C:cytoskeleton; P:carbohydrate metabolic process; P:carbohydrate metabolic process; P:sulfur compound metabolic process; P:response to stress; P:aging; P:cell proliferation; P:biosynthetic process; P:biosynthetic process; P:embryo development; F:oxidoreductase activity; P:cell differentiation; C:protein-containing complex; P:cellular…	EC:1.8.1.7; EC:1.8.1.9	Glutathione-disulfide reductase; Thioredoxin-disulfide reductase	Coil (COILS); PR00368 (PRINTS); PR00411 (PRINTS); IPR001623 (SMART); IPR001623 (PFAM); IPR006338 (TIGRFAM); IPR036188 (G3DSA:3.50.50.GENE3D); IPR036869 (G3DSA:1.10.287.GENE3D); IPR004099 (PFAM); IPR001100 (PIRSF); IPR023753 (PFAM); PTHR43256:SF3 (PANTHER); PTHR43256 (PANTHER); IPR012999 (PROSITE_PATTERNS); IPR001623 (PROSITE_PROFILES); IPR001623 (CDD); IPR036188 (SUPERFAMILY); IPR016156 (SUPERFAM…	F:GO:0004791; F:GO:0009055; F:GO:0016491; F:GO:0016668; P:GO:0045454; F:GO:0050660; P:GO:0055114	F:thioredoxin-disulfide reductase activity; F:electron transfer activity; F:oxidoreductase activity; F:oxidoreductase activity, acting on a sulfur group of donors, NAD(P) as acceptor; P:cell redox homeostasis; F:flavin adenine dinucleotide binding; P:oxidation-reduction process
TRUE	[INTERPRO, BLASTED, MAPPED, GO-SLIM]	DERPT_G617	: Full=Nitrate reductase	587	20	4.19661e-158	54.9	8	C:GO:0005739; C:GO:0005777; P:GO:0006790; F:GO:0016491; F:GO:0043167; P:GO:0044281; P:GO:0051186; P:GO:0071941	C:mitochondrion; C:peroxisome; P:sulfur compound metabolic process; F:oxidoreductase activity; F:ion binding; P:small molecule metabolic process; P:cofactor metabolic process; P:nitrogen cycle metabolic process	EC:1.8.3.1; EC:1.7.99.4	Sulfite oxidase; Nitrate reductase	IPR008335 (PRINTS); IPR001199 (PRINTS); IPR001199 (SMART); IPR001199 (PFAM); IPR036374 (G3DSA:3.90.420.GENE3D); G3DSA:2.60.40.650 (GENE3D); IPR036400 (G3DSA:3.10.120.GENE3D); IPR000572 (PFAM); IPR005066 (PFAM); PTHR19372 (PANTHER); IPR022407 (PROSITE_PATTERNS); IPR018506 (PROSITE_PATTERNS); NON_CYTOPLASMIC_DOMAIN (PHOBIUS); SIGNAL_PEPTIDE (PHOBIUS); SIGNAL_PEPTIDE_H_REGION (PHOBIUS); SIGNAL_PEPTI…	F:GO:0016491; F:GO:0020037; F:GO:0030151; P:GO:0042128; F:GO:0043546; P:GO:0055114	F:oxidoreductase activity; F:heme binding; F:molybdenum ion binding; P:nitrate assimilation; F:molybdopterin cofactor binding; P:oxidation-reduction process
TRUE	[INTERPRO, BLASTED, MAPPED, GO-SLIM]	DERPT_G6602	: Full=Sulfhydryl oxidase 1 ame: Full=Quiescin Q6 Flags: Precursor	2055	12	1.10553e-172	48.29	5	C:GO:0005576; C:GO:0005634; P:GO:0006397; F:GO:0016491; P:GO:0042592	C:extracellular region; C:nucleus; P:mRNA processing; F:oxidoreductase activity; P:homeostatic process	EC:1.8.3.2	Thiol oxidase	Coil (COILS); Coil (COILS); Coil (COILS); Coil (COILS); Coil (COILS); Coil (COILS); Coil (COILS); Coil (COILS); Coil (COILS); IPR003034 (SMART); IPR006568 (SMART); IPR036361 (G3DSA:1.10.720.GENE3D); IPR007180 (PFAM); IPR017905 (PFAM); IPR036774 (G3DSA:1.20.120.GENE3D); G3DSA:1.20.120.1960 (GENE3D); G3DSA:3.40.30.10 (GENE3D); IPR013766 (PFAM); IPR006568 (PFAM); mobidb-lite (MOBIDB_LITE); mobidb-li…	F:GO:0005515; C:GO:0005634; F:GO:0016972; P:GO:0045454; P:GO:0055114	F:protein binding; C:nucleus; F:thiol oxidase activity; P:cell redox homeostasis; P:oxidation-reduction process
TRUE	[INTERPRO, BLASTED, MAPPED, GO-SLIM]	DERPT_G7601	: Full=Peptide methionine sulfoxide reductase Short= -methionine-S-oxide reductase ame: Full=Peptide-methionine (S)-S-oxide reductase Short=Peptide Met(O) reductase	206	20	3.65784e-40	57.78	7	P:GO:0000902; P:GO:0006464; P:GO:0006950; P:GO:0007568; P:GO:0008219; F:GO:0016491; P:GO:0030154	P:cell morphogenesis; P:cellular protein modification process; P:response to stress; P:aging; P:cell death; F:oxidoreductase activity; P:cell differentiation	EC:1.8.4.11	Peptide-methionine (S)-S-oxide reductase	IPR002569 (PFAM); IPR036509 (G3DSA:3.30.1060.GENE3D); IPR002569 (TIGRFAM); PTHR42799:SF2 (PANTHER); PTHR42799 (PANTHER); SIGNAL_PEPTIDE_N_REGION (PHOBIUS); NON_CYTOPLASMIC_DOMAIN (PHOBIUS); SIGNAL_PEPTIDE_C_REGION (PHOBIUS); SIGNAL_PEPTIDE (PHOBIUS); SIGNAL_PEPTIDE_H_REGION (PHOBIUS); IPR002569 (HAMAP); IPR036509 (SUPERFAMILY)	F:GO:0008113; P:GO:0055114	F:peptide-methionine (S)-S-oxide reductase activity; P:oxidation-reduction process
TRUE	[INTERPRO, BLASTED, MAPPED, GO-SLIM]	DERPT_G8140	: Full=Coatomer subunit beta ame: Full=Beta-coat Short=Beta-COP	1438	20	0	68.07	11	P:GO:0000902; P:GO:0002376; F:GO:0005198; C:GO:0005794; C:GO:0005829; P:GO:0006950; P:GO:0009790; P:GO:0016192; F:GO:0016491; C:GO:0031410; C:GO:0032991	P:cell morphogenesis; P:immune system process; F:structural molecule activity; C:Golgi apparatus; C:cytosol; P:response to stress; P:embryo development; P:vesicle-mediated transport; F:oxidoreductase activity; C:cytoplasmic vesicle; C:protein-containing complex	EC:1.8.4.12	Peptide-methionine (R)-S-oxide reductase	Coil (COILS); IPR002579 (TIGRFAM); G3DSA:2.170.150.20 (GENE3D); IPR011710 (PFAM); IPR029446 (PFAM); IPR011989 (G3DSA:1.25.10.GENE3D); IPR002579 (PFAM); IPR002553 (PFAM); mobidb-lite (MOBIDB_LITE); mobidb-lite (MOBIDB_LITE); mobidb-lite (MOBIDB_LITE); IPR016460 (PANTHER); IPR002579 (PROSITE_PROFILES); SignalP-TM (SIGNALP_GRAM_POSITIVE); IPR011057 (SUPERFAMILY); IPR016024 (SUPERFAMILY)	F:GO:0005198; F:GO:0005488; C:GO:0005737; P:GO:0006886; P:GO:0016192; C:GO:0030117; C:GO:0030126; F:GO:0033743; P:GO:0055114	F:structural molecule activity; F:binding; C:cytoplasm; P:intracellular protein transport; P:vesicle-mediated transport; C:membrane coat; C:COPI vesicle coat; F:peptide-methionine (R)-S-oxide reductase activity; P:oxidation-reduction process
TRUE	[INTERPRO, BLASTED, MAPPED, GO-SLIM]	DERPT_G7887	: Full=Thioredoxin Short=Trx	150	20	7.22366e-34	63.27	12	P:GO:0000003; C:GO:0005730; C:GO:0005739; P:GO:0006457; P:GO:0006464; P:GO:0006790; P:GO:0006950; P:GO:0007049; F:GO:0016491; P:GO:0042592; P:GO:0044281; P:GO:0048856	P:reproduction; C:nucleolus; C:mitochondrion; P:protein folding; P:cellular protein modification process; P:sulfur compound metabolic process; P:response to stress; P:cell cycle; F:oxidoreductase activity; P:homeostatic process; P:small molecule metabolic process; P:anatomical structure development	EC:1.8.4.12; EC:1.8.4.11	Peptide-methionine (R)-S-oxide reductase; Peptide-methionine (S)-S-oxide reductase	Coil (COILS); G3DSA:3.40.30.10 (GENE3D); IPR013766 (PFAM); IPR005746 (PIRSF); PTHR43601:SF3 (PANTHER); PTHR43601 (PANTHER); IPR017937 (PROSITE_PATTERNS); IPR013766 (PROSITE_PROFILES); cd02947 (CDD); IPR036249 (SUPERFAMILY)	P:GO:0006662; F:GO:0015035; P:GO:0045454	P:glycerol ether metabolic process; F:protein disulfide oxidoreductase activity; P:cell redox homeostasis
TRUE	[INTERPRO, BLASTED, MAPPED, GO-SLIM]	DERPT_G8642	: Full=5 -nucleotidase Short=5 -NT ame: Full=Ecto-5 -nucleotidase ame: CD_antigen=CD73 Flags: Precursor	756	20	8.20538e-41	45.01	9	C:GO:0005622; P:GO:0006091; F:GO:0016491; F:GO:0022857; F:GO:0022857; F:GO:0022857; C:GO:0032991; P:GO:0034655; P:GO:0044281	C:intracellular; P:generation of precursor metabolites and energy; F:oxidoreductase activity; F:transmembrane transporter activity; F:transmembrane transporter activity; F:transmembrane transporter activity; C:protein-containing complex; P:nucleobase-containing compound catabolic process; P:small molecule metabolic process	EC:1.9.3.1	Cytochrome-c oxidase	IPR006179 (PRINTS); IPR036907 (G3DSA:3.90.780.GENE3D); IPR008334 (PFAM); IPR036639 (G3DSA:1.10.442.GENE3D); IPR004843 (PFAM); IPR004203 (PFAM); IPR029052 (G3DSA:3.60.21.GENE3D); IPR006179 (PANTHER); PTHR11575:SF24 (PANTHER); NON_CYTOPLASMIC_DOMAIN (PHOBIUS); CYTOPLASMIC_DOMAIN (PHOBIUS); TRANSMEMBRANE (PHOBIUS); IPR004203 (CDD); cd07406 (CDD); SSF56300 (SUPERFAMILY); IPR036907 (SUPERFAMILY); IPR0…	F:GO:0004129; P:GO:0009166; F:GO:0016787	F:cytochrome-c oxidase activity; P:nucleotide catabolic process; F:hydrolase activity
TRUE	[INTERPRO, BLASTED, MAPPED, GO-SLIM]	DERPT_G8196	: Full=Cytochrome c oxidase subunit mitochondrial ame: Full=Cytochrome c oxidase polypeptide Vb Flags: Precursor	153	7	1.06928e-16	52.78	9	C:GO:0005739; P:GO:0006091; F:GO:0016491; F:GO:0022857; F:GO:0022857; F:GO:0022857; C:GO:0032991; P:GO:0034641; P:GO:0044281	C:mitochondrion; P:generation of precursor metabolites and energy; F:oxidoreductase activity; F:transmembrane transporter activity; F:transmembrane transporter activity; F:transmembrane transporter activity; C:protein-containing complex; P:cellular nitrogen compound metabolic process; P:small molecule metabolic process	EC:1.9.3.1	Cytochrome-c oxidase	IPR002124 (PFAM); IPR036972 (G3DSA:2.60.11.GENE3D); IPR002124 (PANTHER); IPR002124 (PRODOM); IPR002124 (PROSITE_PROFILES); SSF57802 (SUPERFAMILY)	F:GO:0004129; C:GO:0005740	F:cytochrome-c oxidase activity; C:mitochondrial envelope
TRUE	[INTERPRO, BLASTED, MAPPED, GO-SLIM]	DERPT_G6302	: Full=Cytochrome c oxidase subunit 6C ame: Full=Cytochrome c oxidase polypeptide VIc	78	12	1.11336e-09	57.41	9	C:GO:0005739; P:GO:0006091; F:GO:0016491; F:GO:0022857; F:GO:0022857; F:GO:0022857; C:GO:0032991; P:GO:0034641; P:GO:0044281	C:mitochondrion; P:generation of precursor metabolites and energy; F:oxidoreductase activity; F:transmembrane transporter activity; F:transmembrane transporter activity; F:transmembrane transporter activity; C:protein-containing complex; P:cellular nitrogen compound metabolic process; P:small molecule metabolic process	EC:1.9.3.1	Cytochrome-c oxidase	IPR037169 (G3DSA:4.10.93.GENE3D); IPR034884 (PFAM); TRANSMEMBRANE (PHOBIUS); CYTOPLASMIC_DOMAIN (PHOBIUS); NON_CYTOPLASMIC_DOMAIN (PHOBIUS); IPR004204 (PRODOM); IPR037169 (SUPERFAMILY)	F:GO:0004129	F:cytochrome-c oxidase activity
TRUE	[INTERPRO, BLASTED, MAPPED, GO-SLIM]	DERPT_G4370	: Full=Cytochrome c oxidase subunit mitochondrial ame: Full=Cytochrome c oxidase polypeptide Va Flags: Precursor	396	20	4.30629e-42	78.79	10	C:GO:0005576; C:GO:0005739; P:GO:0006091; F:GO:0016491; F:GO:0022857; F:GO:0022857; F:GO:0022857; C:GO:0032991; P:GO:0034641; P:GO:0044281	C:extracellular region; C:mitochondrion; P:generation of precursor metabolites and energy; F:oxidoreductase activity; F:transmembrane transporter activity; F:transmembrane transporter activity; F:transmembrane transporter activity; C:protein-containing complex; P:cellular nitrogen compound metabolic process; P:small molecule metabolic process	EC:1.9.3.1	Cytochrome-c oxidase	IPR003204 (PFAM); IPR036545 (G3DSA:1.25.40.GENE3D); mobidb-lite (MOBIDB_LITE); mobidb-lite (MOBIDB_LITE); IPR003204 (PANTHER); IPR003204 (CDD); IPR036545 (SUPERFAMILY)	F:GO:0004129; C:GO:0005743	F:cytochrome-c oxidase activity; C:mitochondrial inner membrane
TRUE	[INTERPRO, BLASTED, MAPPED, GO-SLIM]	DERPT_G4160	: Full=Heme A synthase Short=HAS ame: Full=Cytochrome aa3-controlling	1151	20	2.97032e-107	58.32	14	C:GO:0005739; P:GO:0006091; P:GO:0009058; P:GO:0009058; F:GO:0016491; F:GO:0016746; F:GO:0022857; F:GO:0022857; F:GO:0022857; C:GO:0032991; P:GO:0034641; P:GO:0044281; P:GO:0051186; P:GO:0065003	C:mitochondrion; P:generation of precursor metabolites and energy; P:biosynthetic process; P:biosynthetic process; F:oxidoreductase activity; F:transferase activity, transferring acyl groups; F:transmembrane transporter activity; F:transmembrane transporter activity; F:transmembrane transporter activity; C:protein-containing complex; P:cellular nitrogen compound metabolic process; P:small molecul…	EC:1.9.3.1	Cytochrome-c oxidase	IPR006621 (SMART); IPR003780 (PFAM); IPR002656 (PFAM); IPR023754 (PANTHER); PTHR23289:SF2 (PANTHER); CYTOPLASMIC_DOMAIN (PHOBIUS); CYTOPLASMIC_DOMAIN (PHOBIUS); CYTOPLASMIC_DOMAIN (PHOBIUS); NON_CYTOPLASMIC_DOMAIN (PHOBIUS); NON_CYTOPLASMIC_DOMAIN (PHOBIUS); TRANSMEMBRANE (PHOBIUS); CYTOPLASMIC_DOMAIN (PHOBIUS); CYTOPLASMIC_DOMAIN (PHOBIUS); TRANSMEMBRANE (PHOBIUS); TRANSMEMBRANE (PHOBIUS); TRANS…	P:GO:0006784; C:GO:0016020; C:GO:0016021; F:GO:0016627; F:GO:0016747; P:GO:0055114	P:heme a biosynthetic process; C:membrane; C:integral component of membrane; F:oxidoreductase activity, acting on the CH-CH group of donors; F:transferase activity, transferring acyl groups other than amino-acyl groups; P:oxidation-reduction process
TRUE	[INTERPRO, BLASTED, MAPPED, GO-SLIM]	DERPT_G3400	: Full=Cytochrome c oxidase subunit 6B1 ame: Full=Cytochrome c oxidase subunit VIb isoform 1 Short=COX VIb-1	96	17	2.30115e-28	67	15	C:GO:0005739; P:GO:0006091; P:GO:0006950; P:GO:0007005; C:GO:0009536; C:GO:0009579; F:GO:0016491; F:GO:0022857; F:GO:0022857; F:GO:0022857; C:GO:0032991; P:GO:0034641; F:GO:0043167; P:GO:0044281; P:GO:0065003	C:mitochondrion; P:generation of precursor metabolites and energy; P:response to stress; P:mitochondrion organization; C:plastid; C:thylakoid; F:oxidoreductase activity; F:transmembrane transporter activity; F:transmembrane transporter activity; F:transmembrane transporter activity; C:protein-containing complex; P:cellular nitrogen compound metabolic process; F:ion binding; P:small molecule metab…	EC:1.9.3.1	Cytochrome-c oxidase	IPR036549 (G3DSA:1.10.10.GENE3D); IPR003213 (PIRSF); IPR003213 (PFAM); PTHR11387:SF2 (PANTHER); IPR003213 (PANTHER); PD015172 (PRODOM); IPR003213 (CDD); IPR036549 (SUPERFAMILY)	C:GO:0005739	C:mitochondrion
TRUE	[INTERPRO, BLASTED, MAPPED, GO-SLIM]	DERPT_G5463	: Full=Vitamin D3 receptor Short=VDR ame: Full=1,25-dihydroxyvitamin D3 receptor ame: Full=Nuclear receptor subfamily 1 group I member 1	902	20	1.8583e-38	71.82	41	P:GO:0000003; C:GO:0000228; P:GO:0000902; P:GO:0002376; F:GO:0003677; F:GO:0003700; F:GO:0003700; F:GO:0004871; C:GO:0005654; C:GO:0005730; C:GO:0005829; C:GO:0005886; P:GO:0005975; P:GO:0005975; P:GO:0006091; P:GO:0006629; P:GO:0006914; P:GO:0006950; P:GO:0007155; P:GO:0007568; F:GO:0008134; P:GO:0008219; P:GO:0008283; F:GO:0008289; P:GO:0009058; P:GO:0009058; P:GO:0009790; P:GO:0016192; P:GO:00…	P:reproduction; C:nuclear chromosome; P:cell morphogenesis; P:immune system process; F:DNA binding; F:DNA-binding transcription factor activity; F:DNA-binding transcription factor activity; F:obsolete signal transducer activity; C:nucleoplasm; C:nucleolus; C:cytosol; C:plasma membrane; P:carbohydrate metabolic process; P:carbohydrate metabolic process; P:generation of precursor metabolites and en…	EC:1.97.1	Other oxidoreductases	IPR001628 (PRINTS); IPR001628 (SMART); IPR000536 (SMART); IPR001628 (PFAM); IPR013088 (G3DSA:3.30.50.GENE3D); IPR000536 (PFAM); G3DSA:1.10.565.10 (GENE3D); mobidb-lite (MOBIDB_LITE); mobidb-lite (MOBIDB_LITE); mobidb-lite (MOBIDB_LITE); PTHR24082 (PANTHER); PTHR24082:SF283 (PANTHER); IPR001628 (PROSITE_PATTERNS); IPR000536 (PROSITE_PROFILES); IPR001628 (PROSITE_PROFILES); cd06966 (CDD); IPR035500…	F:GO:0003700; C:GO:0005634; P:GO:0006355; F:GO:0008270; F:GO:0043565	F:DNA-binding transcription factor activity; C:nucleus; P:regulation of transcription, DNA-templated; F:zinc ion binding; F:sequence-specific DNA binding
TRUE	[INTERPRO, BLASTED, MAPPED, GO-SLIM]	DERPT_G11521	: Full=Galectin-9 Short=Gal-9	386	20	4.89859e-20	51.51	18	P:GO:0000003; P:GO:0002376; C:GO:0005576; C:GO:0005634; C:GO:0005737; C:GO:0005886; P:GO:0006464; P:GO:0006950; P:GO:0007155; P:GO:0007155; P:GO:0007165; P:GO:0008283; P:GO:0016192; F:GO:0019899; P:GO:0030154; F:GO:0030234; P:GO:0048856; P:GO:0048870	P:reproduction; P:immune system process; C:extracellular region; C:nucleus; C:cytoplasm; C:plasma membrane; P:cellular protein modification process; P:response to stress; P:cell adhesion; P:cell adhesion; P:signal transduction; P:cell proliferation; P:vesicle-mediated transport; F:enzyme binding; P:cell differentiation; F:enzyme regulator activity; P:anatomical structure development; P:cell motil…	EC:1.97.1	Other oxidoreductases	IPR001079 (SMART); IPR001079 (SMART); IPR001079 (PFAM); G3DSA:2.60.120.200 (GENE3D); mobidb-lite (MOBIDB_LITE); mobidb-lite (MOBIDB_LITE); PTHR11346 (PANTHER); TRANSMEMBRANE (PHOBIUS); NON_CYTOPLASMIC_DOMAIN (PHOBIUS); CYTOPLASMIC_DOMAIN (PHOBIUS); IPR001079 (PROSITE_PROFILES); IPR001079 (CDD); IPR013320 (SUPERFAMILY); TMhelix (TMHMM); TMhelix (TMHMM); TMhelix (TMHMM)	F:GO:0030246	F:carbohydrate binding
TRUE	[INTERPRO, BLASTED, MAPPED, GO-SLIM]	DERPT_G11171	: Full=Thioredoxin reductase cytoplasmic Short=TR ame: Full=Thioredoxin reductase TR1	972	20	6.66902e-177	65.39	31	P:GO:0002376; F:GO:0003735; C:GO:0005576; C:GO:0005654; C:GO:0005730; C:GO:0005739; C:GO:0005829; C:GO:0005840; C:GO:0005856; P:GO:0005975; P:GO:0005975; P:GO:0006412; P:GO:0006520; P:GO:0006790; P:GO:0006950; P:GO:0007568; P:GO:0008219; P:GO:0008283; P:GO:0009056; C:GO:0009536; P:GO:0009790; F:GO:0016491; P:GO:0030154; C:GO:0032991; P:GO:0042254; P:GO:0042592; F:GO:0043167; P:GO:0048646; P:GO:00…	P:immune system process; F:structural constituent of ribosome; C:extracellular region; C:nucleoplasm; C:nucleolus; C:mitochondrion; C:cytosol; C:ribosome; C:cytoskeleton; P:carbohydrate metabolic process; P:carbohydrate metabolic process; P:translation; P:cellular amino acid metabolic process; P:sulfur compound metabolic process; P:response to stress; P:aging; P:cell death; P:cell proliferation; …	EC:1.97.1.9; EC:1.6.3.1; EC:1.8.1.7; EC:1.8.1.9	Selenate reductase; NAD(P)H oxidase (H(2)O(2)-forming); Glutathione-disulfide reductase; Thioredoxin-disulfide reductase	Coil (COILS); PR00368 (PRINTS); PR00411 (PRINTS); IPR036188 (G3DSA:3.50.50.GENE3D); G3DSA:3.30.70.3370 (GENE3D); IPR001976 (PFAM); IPR023753 (PFAM); IPR036188 (G3DSA:3.50.50.GENE3D); IPR004099 (PFAM); IPR016156 (G3DSA:3.30.390.GENE3D); IPR006338 (TIGRFAM); mobidb-lite (MOBIDB_LITE); PTHR43256 (PANTHER); PTHR43256:SF3 (PANTHER); IPR018098 (PROSITE_PATTERNS); IPR012999 (PROSITE_PATTERNS); IPR001976…	F:GO:0003735; F:GO:0004791; C:GO:0005622; C:GO:0005840; P:GO:0006412; F:GO:0016491; F:GO:0016668; P:GO:0045454; F:GO:0050660; P:GO:0055114	F:structural constituent of ribosome; F:thioredoxin-disulfide reductase activity; C:intracellular; C:ribosome; P:translation; F:oxidoreductase activity; F:oxidoreductase activity, acting on a sulfur group of donors, NAD(P) as acceptor; P:cell redox homeostasis; F:flavin adenine dinucleotide binding; P:oxidation-reduction process
TRUE	[INTERPRO, BLASTED, MAPPED, GO-SLIM]	DERPT_G8302	: Full= nucleic acid deglycase DJ-1 ame: Full=Maillard deglycase ame: Full=Parkinson disease 7 homolog ame: Full=Parkinsonism-associated deglycase ame: Full= DJ-1 Short=DJ-1 Flags: Precursor	217	20	1.15054e-56	59.6	40	P:GO:0000003; F:GO:0000988; F:GO:0003677; F:GO:0003729; C:GO:0005576; C:GO:0005634; C:GO:0005654; C:GO:0005694; C:GO:0005739; C:GO:0005773; C:GO:0005783; C:GO:0005829; P:GO:0006091; P:GO:0006464; P:GO:0006520; P:GO:0006790; P:GO:0006913; P:GO:0006950; P:GO:0007005; P:GO:0007165; P:GO:0007267; F:GO:0008134; P:GO:0008219; F:GO:0008233; P:GO:0008283; P:GO:0009056; P:GO:0009056; P:GO:0009058; P:GO:00…	P:reproduction; F:obsolete transcription factor activity, protein binding; F:DNA binding; F:mRNA binding; C:extracellular region; C:nucleus; C:nucleoplasm; C:chromosome; C:mitochondrion; C:vacuole; C:endoplasmic reticulum; C:cytosol; P:generation of precursor metabolites and energy; P:cellular protein modification process; P:cellular amino acid metabolic process; P:sulfur compound metabolic proce…	EC:1.97.1; EC:1.11.1.15	Other oxidoreductases; Peroxiredoxin	IPR002818 (PFAM); IPR029062 (G3DSA:3.40.50.GENE3D); IPR006287 (TIGRFAM); PTHR43444:SF2 (PANTHER); PTHR43444 (PANTHER); cd03135 (CDD); IPR029062 (SUPERFAMILY)	no GO terms	no GO terms
TRUE	[INTERPRO, BLASTED, MAPPED, GO-SLIM]	DERPT_G627	: Full=Superoxide dismutase	355	20	1.36494e-26	58.91	11	P:GO:0000003; P:GO:0003013; C:GO:0005829; P:GO:0006950; P:GO:0009058; F:GO:0016491; P:GO:0034641; P:GO:0042592; F:GO:0043167; C:GO:0043226; P:GO:0048856	P:reproduction; P:circulatory system process; C:cytosol; P:response to stress; P:biosynthetic process; F:oxidoreductase activity; P:cellular nitrogen compound metabolic process; P:homeostatic process; F:ion binding; C:organelle; P:anatomical structure development	EC:1.97.1; EC:1.15.1.1	Other oxidoreductases; Superoxide dismutase	Coil (COILS); IPR001424 (PRINTS); IPR036423 (G3DSA:2.60.40.GENE3D); IPR001424 (PFAM); mobidb-lite (MOBIDB_LITE); IPR024134 (PANTHER); PTHR10003:SF59 (PANTHER); IPR018152 (PROSITE_PATTERNS); IPR001424 (CDD); IPR036423 (SUPERFAMILY)	F:GO:0004784; P:GO:0006801; F:GO:0046872; P:GO:0055114	F:superoxide dismutase activity; P:superoxide metabolic process; F:metal ion binding; P:oxidation-reduction process
TRUE	[INTERPRO, BLASTED, MAPPED, MANUAL, GO-SLIM]	DERPT_G8780	Der f30 like allergen: Full=Ferritin heavy chain Short=Ferritin H subunit Contains: ame: Full=Ferritin heavy N-terminally processed	180	20	5.85124e-84	79.46	15	F:GO:0004322; C:GO:0005634; C:GO:0005739; P:GO:0006880; P:GO:0006955; F:GO:0008199; P:GO:0008284; P:GO:0015994; C:GO:0044754; P:GO:0048147; P:GO:0055114; C:GO:0070062; P:GO:0097286; P:GO:1904231; P:GO:1904234	F:ferroxidase activity; C:nucleus; C:mitochondrion; P:intracellular sequestering of iron ion; P:immune response; F:ferric iron binding; P:positive regulation of cell proliferation; P:chlorophyll metabolic process; C:autolysosome; P:negative regulation of fibroblast proliferation; P:oxidation-reduction process; C:extracellular exosome; P:iron ion import; P:positive regulation of succinate dehydrog…	EC:1.97.1; EC:1.16.3.1; EC:1.16.3	Other oxidoreductases; Ferroxidase; Oxidizing metal ions	Coil (COILS); IPR012347 (G3DSA:1.20.1260.GENE3D); IPR008331 (PFAM); IPR001519 (PANTHER); IPR014034 (PROSITE_PATTERNS); IPR014034 (PROSITE_PATTERNS); IPR009040 (PROSITE_PROFILES); cd01056 (CDD); IPR009078 (SUPERFAMILY)	P:GO:0006826; P:GO:0006879; F:GO:0008199	P:iron ion transport; P:cellular iron ion homeostasis; F:ferric iron binding
TRUE	[INTERPRO, BLASTED, MAPPED, GO-SLIM]	DERPT_G755	: Full=2Fe-2S ferredoxin ame: Full=Adrenodoxin	1293	20	2.93794e-36	70.21	12	C:GO:0005739; P:GO:0006629; P:GO:0006790; P:GO:0009058; P:GO:0009058; F:GO:0016491; F:GO:0019899; P:GO:0022607; P:GO:0034641; F:GO:0043167; P:GO:0044281; P:GO:0051186	C:mitochondrion; P:lipid metabolic process; P:sulfur compound metabolic process; P:biosynthetic process; P:biosynthetic process; F:oxidoreductase activity; F:enzyme binding; P:cellular component assembly; P:cellular nitrogen compound metabolic process; F:ion binding; P:small molecule metabolic process; P:cofactor metabolic process	EC:1.97.1; EC:1.18.1.6; EC:1.14.15.6; EC:1.14.15	Other oxidoreductases; Adrenodoxin-NADP(+) reductase; Cholesterol monooxygenase (side-chain-cleaving); Acting on paired donors, with incorporation or reduction of molecular oxygen. The oxygen incorporated need not be derived from O(2)	Coil (COILS); Coil (COILS); Coil (COILS); Coil (COILS); Coil (COILS); Coil (COILS); IPR001055 (PRINTS); IPR012675 (G3DSA:3.10.20.GENE3D); IPR001041 (PFAM); mobidb-lite (MOBIDB_LITE); mobidb-lite (MOBIDB_LITE); mobidb-lite (MOBIDB_LITE); mobidb-lite (MOBIDB_LITE); PTHR23426:SF26 (PANTHER); PTHR23426 (PANTHER); IPR018298 (PROSITE_PATTERNS); CYTOPLASMIC_DOMAIN (PHOBIUS); TRANSMEMBRANE (PHOBIUS); SIG…	F:GO:0009055; F:GO:0051536; F:GO:0051537	F:electron transfer activity; F:iron-sulfur cluster binding; F:2 iron, 2 sulfur cluster binding
TRUE	[INTERPRO, BLASTED, MAPPED, GO-SLIM]	DERPT_G8431	: Full=Tyrosine- kinase CSK ame: Full=C-Src kinase	490	20	4.79576e-157	61.25	45	P:GO:0000003; P:GO:0000278; P:GO:0000902; P:GO:0002376; C:GO:0005576; C:GO:0005634; C:GO:0005829; C:GO:0005856; C:GO:0005886; P:GO:0005975; P:GO:0005975; P:GO:0006091; P:GO:0006464; P:GO:0006913; P:GO:0006950; P:GO:0007009; P:GO:0007010; P:GO:0007155; P:GO:0007155; P:GO:0007165; P:GO:0007267; P:GO:0007568; F:GO:0008092; P:GO:0008219; P:GO:0008283; P:GO:0009058; P:GO:0009790; P:GO:0016192; F:GO:00…	P:reproduction; P:mitotic cell cycle; P:cell morphogenesis; P:immune system process; C:extracellular region; C:nucleus; C:cytosol; C:cytoskeleton; C:plasma membrane; P:carbohydrate metabolic process; P:carbohydrate metabolic process; P:generation of precursor metabolites and energy; P:cellular protein modification process; P:nucleocytoplasmic transport; P:response to stress; P:plasma membrane org…	EC:1.97.1; EC:2.7.10; EC:2.7.10.2	Other oxidoreductases; Transferring phosphorus-containing groups; Non-specific protein-tyrosine kinase	IPR001245 (PRINTS); IPR000980 (PRINTS); IPR000980 (SMART); IPR020635 (SMART); PIRSF000615 (PIRSF); IPR036860 (G3DSA:3.30.505.GENE3D); IPR000980 (PFAM); IPR001245 (PFAM); G3DSA:1.10.510.10 (GENE3D); PTHR24418 (PANTHER); IPR035026 (PTHR24418:PANTHER); IPR017441 (PROSITE_PATTERNS); IPR008266 (PROSITE_PATTERNS); IPR000980 (PROSITE_PROFILES); IPR000719 (PROSITE_PROFILES); cd05039 (CDD); IPR035027 (CDD…	F:GO:0004672; F:GO:0004713; F:GO:0005524; P:GO:0006468	F:protein kinase activity; F:protein tyrosine kinase activity; F:ATP binding; P:protein phosphorylation
TRUE	[INTERPRO, BLASTED, MAPPED, GO-SLIM]	DERPT_G163	: Full=RAC-beta serine threonine- kinase ame: Full= kinase Akt-2 ame: Full= kinase B beta Short=PKB beta ame: Full=RAC-PK-beta	604	20	0	74.34	49	P:GO:0000003; P:GO:0000278; P:GO:0000902; P:GO:0002376; P:GO:0003013; C:GO:0005654; C:GO:0005739; C:GO:0005768; C:GO:0005794; C:GO:0005815; C:GO:0005829; C:GO:0005886; C:GO:0005929; P:GO:0005975; P:GO:0005975; P:GO:0006091; P:GO:0006259; P:GO:0006412; P:GO:0006464; P:GO:0006520; P:GO:0006605; P:GO:0006629; P:GO:0006913; P:GO:0006914; P:GO:0006950; P:GO:0007005; P:GO:0007009; P:GO:0007010; P:GO:00…	P:reproduction; P:mitotic cell cycle; P:cell morphogenesis; P:immune system process; P:circulatory system process; C:nucleoplasm; C:mitochondrion; C:endosome; C:Golgi apparatus; C:microtubule organizing center; C:cytosol; C:plasma membrane; C:cilium; P:carbohydrate metabolic process; P:carbohydrate metabolic process; P:generation of precursor metabolites and energy; P:DNA metabolic process; P:tra…	EC:1.97.1; EC:2.7.11; EC:2.7.12.1	Other oxidoreductases; Transferring phosphorus-containing groups; Dual-specificity kinase	IPR000961 (SMART); IPR000719 (SMART); IPR001849 (SMART); G3DSA:1.10.510.10 (GENE3D); IPR000719 (PFAM); IPR011993 (G3DSA:2.30.29.GENE3D); IPR001849 (PFAM); G3DSA:3.30.200.20 (GENE3D); IPR017892 (PFAM); mobidb-lite (MOBIDB_LITE); PTHR24356 (PANTHER); PTHR24356:SF176 (PANTHER); IPR008271 (PROSITE_PATTERNS); IPR017441 (PROSITE_PATTERNS); IPR000961 (PROSITE_PROFILES); IPR000719 (PROSITE_PROFILES); IPR…	F:GO:0004672; F:GO:0004674; F:GO:0005524; P:GO:0006468	F:protein kinase activity; F:protein serine/threonine kinase activity; F:ATP binding; P:protein phosphorylation
TRUE	[INTERPRO, BLASTED, MAPPED, GO-SLIM]	DERPT_G9527	: Full=Ras 1 Flags: Precursor	187	20	1.59844e-104	89.67	34	P:GO:0000003; P:GO:0000278; P:GO:0000902; P:GO:0002376; F:GO:0003924; C:GO:0005576; C:GO:0005739; C:GO:0005794; C:GO:0005829; C:GO:0005886; P:GO:0006464; P:GO:0006605; P:GO:0006913; P:GO:0006914; P:GO:0006950; P:GO:0007010; P:GO:0007165; P:GO:0007267; P:GO:0007568; P:GO:0008219; P:GO:0008283; P:GO:0009058; P:GO:0009790; P:GO:0016192; F:GO:0019899; P:GO:0021700; P:GO:0030154; P:GO:0034641; P:GO:00…	P:reproduction; P:mitotic cell cycle; P:cell morphogenesis; P:immune system process; F:GTPase activity; C:extracellular region; C:mitochondrion; C:Golgi apparatus; C:cytosol; C:plasma membrane; P:cellular protein modification process; P:protein targeting; P:nucleocytoplasmic transport; P:autophagy; P:response to stress; P:cytoskeleton organization; P:signal transduction; P:cell-cell signaling; P:…	EC:1.97.1; EC:3.6.1.15	Other oxidoreductases; Nucleoside-triphosphate phosphatase	PR00449 (PRINTS); SM00175 (SMART); SM00176 (SMART); SM00174 (SMART); SM00173 (SMART); IPR005225 (TIGRFAM); G3DSA:3.40.50.300 (GENE3D); IPR001806 (PFAM); mobidb-lite (MOBIDB_LITE); PTHR24070:SF186 (PANTHER); IPR020849 (PANTHER); IPR020849 (PROSITE_PROFILES); cd04138 (CDD); IPR027417 (SUPERFAMILY)	F:GO:0003924; F:GO:0005525; P:GO:0007165; C:GO:0016020	F:GTPase activity; F:GTP binding; P:signal transduction; C:membrane
TRUE	[INTERPRO, BLASTED, MAPPED, GO-SLIM]	DERPT_G5920	: Full=60S ribosomal L14	348	20	1.31831e-68	66.68	26	P:GO:0000003; F:GO:0003723; F:GO:0003735; C:GO:0005576; C:GO:0005635; C:GO:0005783; C:GO:0005829; C:GO:0005840; P:GO:0006412; P:GO:0006464; P:GO:0006520; P:GO:0006790; P:GO:0006914; P:GO:0007010; P:GO:0007049; P:GO:0007155; P:GO:0007165; F:GO:0008134; F:GO:0008168; P:GO:0008219; P:GO:0008283; P:GO:0009790; C:GO:0032991; P:GO:0040007; P:GO:0042254; P:GO:0051604	P:reproduction; F:RNA binding; F:structural constituent of ribosome; C:extracellular region; C:nuclear envelope; C:endoplasmic reticulum; C:cytosol; C:ribosome; P:translation; P:cellular protein modification process; P:cellular amino acid metabolic process; P:sulfur compound metabolic process; P:autophagy; P:cytoskeleton organization; P:cell cycle; P:cell adhesion; P:signal transduction; F:transc…	EC:2.1.1.100	Protein-S-isoprenylcysteine O-methyltransferase	IPR014722 (G3DSA:2.30.30.GENE3D); G3DSA:1.20.120.1630 (GENE3D); IPR002784 (PFAM); IPR007269 (PFAM); PTHR12714:SF9 (PANTHER); PTHR12714 (PANTHER); TRANSMEMBRANE (PHOBIUS); CYTOPLASMIC_DOMAIN (PHOBIUS); TRANSMEMBRANE (PHOBIUS); NON_CYTOPLASMIC_DOMAIN (PHOBIUS); CYTOPLASMIC_DOMAIN (PHOBIUS); NON_CYTOPLASMIC_DOMAIN (PHOBIUS); CYTOPLASMIC_DOMAIN (PHOBIUS); TRANSMEMBRANE (PHOBIUS); TRANSMEMBRANE (PHOBI…	F:GO:0003735; F:GO:0004671; C:GO:0005622; C:GO:0005783; C:GO:0005840; P:GO:0006412; P:GO:0006481; C:GO:0016021	F:structural constituent of ribosome; F:protein C-terminal S-isoprenylcysteine carboxyl O-methyltransferase activity; C:intracellular; C:endoplasmic reticulum; C:ribosome; P:translation; P:C-terminal protein methylation; C:integral component of membrane
TRUE	[INTERPRO, BLASTED, MAPPED, GO-SLIM]	DERPT_G5470	: Full=Demethylmenaquinone methyltransferase	270	20	8.62077e-84	51.83	11	P:GO:0000003; P:GO:0000902; C:GO:0005829; P:GO:0006629; F:GO:0008168; P:GO:0009058; P:GO:0009058; P:GO:0030154; P:GO:0034641; P:GO:0040007; P:GO:0040011	P:reproduction; P:cell morphogenesis; C:cytosol; P:lipid metabolic process; F:methyltransferase activity; P:biosynthetic process; P:biosynthetic process; P:cell differentiation; P:cellular nitrogen compound metabolic process; P:growth; P:locomotion	EC:2.1.1.103	Phosphoethanolamine N-methyltransferase	Coil (COILS); PF13489 (PFAM); G3DSA:3.40.50.150 (GENE3D); PTHR44307 (PANTHER); cd02440 (CDD); IPR029063 (SUPERFAMILY)	no GO terms	no GO terms
TRUE	[INTERPRO, BLASTED, MAPPED, GO-SLIM]	DERPT_G9735	: Full= arginine N-methyltransferase 1 ame: Full=Histone-arginine N-methyltransferase PRMT1	366	20	1.09387e-162	74.13	21	P:GO:0000902; P:GO:0002376; F:GO:0003677; C:GO:0005730; C:GO:0005829; C:GO:0005840; C:GO:0005886; P:GO:0006399; P:GO:0006464; P:GO:0006913; P:GO:0006950; P:GO:0007165; F:GO:0008168; P:GO:0009058; P:GO:0009790; F:GO:0019899; P:GO:0030154; C:GO:0032991; P:GO:0042254; P:GO:0042592; P:GO:0051276	P:cell morphogenesis; P:immune system process; F:DNA binding; C:nucleolus; C:cytosol; C:ribosome; C:plasma membrane; P:tRNA metabolic process; P:cellular protein modification process; P:nucleocytoplasmic transport; P:response to stress; P:signal transduction; F:methyltransferase activity; P:biosynthetic process; P:embryo development; F:enzyme binding; P:cell differentiation; C:protein-containing …	EC:2.1.1.124	Transferring one-carbon groups	G3DSA:2.70.160.11 (GENE3D); G3DSA:3.40.50.150 (GENE3D); PF06325 (PFAM); PTHR11006:SF54 (PANTHER); PTHR11006 (PANTHER); NON_CYTOPLASMIC_DOMAIN (PHOBIUS); CYTOPLASMIC_DOMAIN (PHOBIUS); TRANSMEMBRANE (PHOBIUS); IPR025799 (PROSITE_PROFILES); cd02440 (CDD); IPR029063 (SUPERFAMILY)	P:GO:0006479; F:GO:0008168	P:protein methylation; F:methyltransferase activity
TRUE	[INTERPRO, BLASTED, MAPPED, GO-SLIM]	DERPT_G841	: Full=Methionine synthase ame: Full=5-methyltetrahydrofolate--homocysteine methyltransferase ame: Full=Methionine vitamin-B12 dependent Short=MS	1252	20	0	69.4	13	C:GO:0005829; P:GO:0006259; P:GO:0006464; P:GO:0006520; P:GO:0006790; P:GO:0006950; F:GO:0008168; P:GO:0009058; P:GO:0009058; P:GO:0030154; F:GO:0043167; P:GO:0048856; P:GO:0051186	C:cytosol; P:DNA metabolic process; P:cellular protein modification process; P:cellular amino acid metabolic process; P:sulfur compound metabolic process; P:response to stress; F:methyltransferase activity; P:biosynthetic process; P:biosynthetic process; P:cell differentiation; F:ion binding; P:anatomical structure development; P:cofactor metabolic process	EC:2.1.1.13	Methionine synthase	IPR003759 (SMART); IPR036589 (G3DSA:3.20.20.GENE3D); IPR000489 (PFAM); G3DSA:1.10.288.10 (GENE3D); G3DSA:3.40.50.280 (GENE3D); IPR004223 (PFAM); IPR036594 (G3DSA:1.10.1240.GENE3D); IPR011822 (PIRSF); IPR037010 (G3DSA:3.10.196.GENE3D); IPR011822 (TIGRFAM); IPR006158 (PFAM); IPR003759 (PFAM); IPR011005 (G3DSA:3.20.20.GENE3D); IPR003726 (PFAM); PTHR21091 (PANTHER); PTHR21091:SF97 (PANTHER); IPR00615…	F:GO:0008270; F:GO:0008705; P:GO:0009086; F:GO:0031419; P:GO:0042558; P:GO:0044237; F:GO:0046872	F:zinc ion binding; F:methionine synthase activity; P:methionine biosynthetic process; F:cobalamin binding; P:pteridine-containing compound metabolic process; P:cellular metabolic process; F:metal ion binding
TRUE	[INTERPRO, BLASTED, MAPPED, GO-SLIM]	DERPT_G7476	: Full=tRNA (guanine-N(7)-)-methyltransferase ame: Full=tRNA (guanine(46)-N(7))-methyltransferase ame: Full=tRNA(m7G46)-methyltransferase	264	20	4.95992e-108	70.51	6	F:GO:0003723; C:GO:0005654; C:GO:0005730; C:GO:0005737; P:GO:0006399; F:GO:0008168	F:RNA binding; C:nucleoplasm; C:nucleolus; C:cytoplasm; P:tRNA metabolic process; F:methyltransferase activity	EC:2.1.1.33	tRNA (guanine(46)-N(7))-methyltransferase	G3DSA:3.40.50.150 (GENE3D); IPR003358 (TIGRFAM); PF02390 (PFAM); IPR025763 (PTHR23417:PANTHER); IPR003358 (PANTHER); IPR025763 (HAMAP); IPR003358 (PROSITE_PROFILES); IPR029063 (SUPERFAMILY)	P:GO:0006400; F:GO:0008176	P:tRNA modification; F:tRNA (guanine-N7-)-methyltransferase activity
TRUE	[INTERPRO, BLASTED, MAPPED, GO-SLIM]	DERPT_G765	: Full=Histone-lysine N- H3 lysine-36 specific ame: Full=SET domain-containing 2	313	20	2.07176e-25	48.01	17	P:GO:0000003; C:GO:0005634; C:GO:0005694; C:GO:0005737; P:GO:0006464; P:GO:0006950; P:GO:0007165; F:GO:0008134; F:GO:0008168; P:GO:0009058; P:GO:0009790; P:GO:0030154; C:GO:0032991; P:GO:0034641; P:GO:0048646; P:GO:0048870; P:GO:0051276	P:reproduction; C:nucleus; C:chromosome; C:cytoplasm; P:cellular protein modification process; P:response to stress; P:signal transduction; F:transcription factor binding; F:methyltransferase activity; P:biosynthetic process; P:embryo development; P:cell differentiation; C:protein-containing complex; P:cellular nitrogen compound metabolic process; P:anatomical structure formation involved in morp…	EC:2.1.1.43	Histone-lysine N-methyltransferase	IPR001214 (SMART); G3DSA:2.170.270.10 (GENE3D); IPR001214 (PFAM); PTHR22884 (PANTHER); PTHR22884:SF482 (PANTHER); IPR001214 (PROSITE_PROFILES); IPR003616 (PROSITE_PROFILES); SSF82199 (SUPERFAMILY)	F:GO:0005515	F:protein binding
TRUE	[INTERPRO, BLASTED, MAPPED, GO-SLIM]	DERPT_G764	: Full=Histone-lysine N- H3 lysine-36 specific ame: Full=SET domain-containing 2	455	20	3.50239e-23	46.8	14	P:GO:0000003; C:GO:0005634; C:GO:0005694; P:GO:0006464; P:GO:0007165; F:GO:0008134; F:GO:0008168; P:GO:0009058; P:GO:0009790; P:GO:0030154; C:GO:0032991; P:GO:0034641; P:GO:0048646; P:GO:0051276	P:reproduction; C:nucleus; C:chromosome; P:cellular protein modification process; P:signal transduction; F:transcription factor binding; F:methyltransferase activity; P:biosynthetic process; P:embryo development; P:cell differentiation; C:protein-containing complex; P:cellular nitrogen compound metabolic process; P:anatomical structure formation involved in morphogenesis; P:chromosome organization	EC:2.1.1.43	Histone-lysine N-methyltransferase	Coil (COILS); Coil (COILS); IPR001214 (SMART); IPR001214 (PFAM); G3DSA:2.170.270.10 (GENE3D); PTHR22884:SF482 (PANTHER); PTHR22884 (PANTHER); TRANSMEMBRANE (PHOBIUS); NON_CYTOPLASMIC_DOMAIN (PHOBIUS); CYTOPLASMIC_DOMAIN (PHOBIUS); IPR001214 (PROSITE_PROFILES); IPR003616 (PROSITE_PROFILES); SSF82199 (SUPERFAMILY)	F:GO:0005515	F:protein binding
TRUE	[INTERPRO, BLASTED, MAPPED, GO-SLIM]	DERPT_G7577	: Full=Serine threonine- phosphatase 6 regulatory ankyrin repeat subunit B Short=PP6-ARS-B Short=Serine threonine- phosphatase 6 regulatory subunit ARS-B ame: Full=Ankyrin repeat domain-containing 44	1777	20	1.80866e-31	45.72	19	P:GO:0003013; C:GO:0005654; C:GO:0005739; C:GO:0005856; C:GO:0005886; P:GO:0006464; P:GO:0006520; P:GO:0007009; P:GO:0007165; F:GO:0008168; P:GO:0009056; P:GO:0009056; P:GO:0009058; P:GO:0009790; P:GO:0030154; P:GO:0034641; P:GO:0042592; P:GO:0051276; P:GO:0055085	P:circulatory system process; C:nucleoplasm; C:mitochondrion; C:cytoskeleton; C:plasma membrane; P:cellular protein modification process; P:cellular amino acid metabolic process; P:plasma membrane organization; P:signal transduction; F:methyltransferase activity; P:catabolic process; P:catabolic process; P:biosynthetic process; P:embryo development; P:cell differentiation; P:cellular nitrogen com…	EC:2.1.1.43	Histone-lysine N-methyltransferase	Coil (COILS); Coil (COILS); IPR002110 (SMART); IPR020683 (PFAM); IPR036770 (G3DSA:1.25.40.GENE3D); PF13637 (PFAM); IPR036770 (G3DSA:1.25.40.GENE3D); mobidb-lite (MOBIDB_LITE); mobidb-lite (MOBIDB_LITE); mobidb-lite (MOBIDB_LITE); mobidb-lite (MOBIDB_LITE); mobidb-lite (MOBIDB_LITE); mobidb-lite (MOBIDB_LITE); mobidb-lite (MOBIDB_LITE); mobidb-lite (MOBIDB_LITE); PTHR24178:SF5 (PANTHER); PTHR24178…	F:GO:0005515	F:protein binding
TRUE	[INTERPRO, BLASTED, MAPPED, GO-SLIM]	DERPT_G750	: Full=N-lysine methyltransferase SMYD2 ame: Full=Histone methyltransferase SMYD2 ame: Full=SET and MYND domain-containing 2	933	20	8.88127e-24	46.35	8	C:GO:0005737; P:GO:0006464; P:GO:0006520; F:GO:0008168; P:GO:0009056; P:GO:0009056; P:GO:0048856; P:GO:0051276	C:cytoplasm; P:cellular protein modification process; P:cellular amino acid metabolic process; F:methyltransferase activity; P:catabolic process; P:catabolic process; P:anatomical structure development; P:chromosome organization	EC:2.1.1.43	Histone-lysine N-methyltransferase	Coil (COILS); Coil (COILS); IPR001214 (PFAM); IPR011990 (G3DSA:1.25.40.GENE3D); PTHR12197:SF246 (PANTHER); PTHR12197 (PANTHER); PTHR12197:SF246 (PANTHER); PTHR12197 (PANTHER); IPR001214 (PROSITE_PROFILES); SSF144232 (SUPERFAMILY); SSF82199 (SUPERFAMILY); IPR011990 (SUPERFAMILY)	F:GO:0005515	F:protein binding
TRUE	[INTERPRO, BLASTED, MAPPED, GO-SLIM]	DERPT_G6809	: Full=Histone-lysine N-methyltransferase EZH2 ame: Full=Enhancer of zeste homolog 2	621	20	2.24299e-147	66.13	23	P:GO:0000003; C:GO:0000228; P:GO:0000278; P:GO:0000902; F:GO:0003677; F:GO:0003723; C:GO:0005654; C:GO:0005737; P:GO:0006259; P:GO:0006464; P:GO:0006950; P:GO:0007165; F:GO:0008168; P:GO:0008283; P:GO:0009058; P:GO:0009790; P:GO:0030154; C:GO:0032991; P:GO:0040007; P:GO:0040011; P:GO:0042592; P:GO:0051276; P:GO:0051301	P:reproduction; C:nuclear chromosome; P:mitotic cell cycle; P:cell morphogenesis; F:DNA binding; F:RNA binding; C:nucleoplasm; C:cytoplasm; P:DNA metabolic process; P:cellular protein modification process; P:response to stress; P:signal transduction; F:methyltransferase activity; P:cell proliferation; P:biosynthetic process; P:embryo development; P:cell differentiation; C:protein-containing compl…	EC:2.1.1.43	Histone-lysine N-methyltransferase	Coil (COILS); IPR033467 (SMART); IPR001214 (SMART); G3DSA:2.170.270.10 (GENE3D); IPR001214 (PFAM); mobidb-lite (MOBIDB_LITE); IPR032926 (PTHR22884:PANTHER); IPR032926 (PTHR22884:PANTHER); PTHR22884 (PANTHER); PTHR22884 (PANTHER); IPR026489 (PROSITE_PROFILES); IPR001214 (PROSITE_PROFILES); SSF82199 (SUPERFAMILY)	F:GO:0005515; F:GO:0018024; P:GO:0070734	F:protein binding; F:histone-lysine N-methyltransferase activity; P:histone H3-K27 methylation
TRUE	[INTERPRO, BLASTED, MAPPED, GO-SLIM]	DERPT_G5960	: Full= dpy-30 homolog ame: Full=Dpy-30 Short=Dpy-30L	268	6	3.40086e-14	72.48	17	P:GO:0000003; C:GO:0005634; C:GO:0005654; C:GO:0005694; C:GO:0005737; C:GO:0005794; P:GO:0006464; P:GO:0006810; P:GO:0007267; F:GO:0008168; P:GO:0009058; P:GO:0009790; P:GO:0030154; P:GO:0034641; P:GO:0040007; P:GO:0040011; P:GO:0051276	P:reproduction; C:nucleus; C:nucleoplasm; C:chromosome; C:cytoplasm; C:Golgi apparatus; P:cellular protein modification process; P:transport; P:cell-cell signaling; F:methyltransferase activity; P:biosynthetic process; P:embryo development; P:cell differentiation; P:cellular nitrogen compound metabolic process; P:growth; P:locomotion; P:chromosome organization	EC:2.1.1.43	Histone-lysine N-methyltransferase	G3DSA:1.20.890.10 (GENE3D); IPR007858 (PFAM); mobidb-lite (MOBIDB_LITE); mobidb-lite (MOBIDB_LITE); IPR037870 (PTHR23356:PANTHER); IPR037870 (PTHR23356:PANTHER); PTHR23356 (PANTHER); PTHR23356 (PANTHER)	C:GO:0048188	C:Set1C/COMPASS complex
TRUE	[INTERPRO, BLASTED, MAPPED, GO-SLIM]	DERPT_G5646	: Full=Histone-lysine N- H3 lysine-36 specific ame: Full=SET domain-containing 2	1560	20	2.84337e-105	56.1	16	P:GO:0000003; C:GO:0005634; C:GO:0005694; C:GO:0005829; P:GO:0006259; P:GO:0006464; P:GO:0006950; P:GO:0007049; P:GO:0007165; F:GO:0008168; P:GO:0009058; P:GO:0009790; P:GO:0030154; P:GO:0048646; P:GO:0048870; P:GO:0051276	P:reproduction; C:nucleus; C:chromosome; C:cytosol; P:DNA metabolic process; P:cellular protein modification process; P:response to stress; P:cell cycle; P:signal transduction; F:methyltransferase activity; P:biosynthetic process; P:embryo development; P:cell differentiation; P:anatomical structure formation involved in morphogenesis; P:cell motility; P:chromosome organization	EC:2.1.1.43	Histone-lysine N-methyltransferase	Coil (COILS); Coil (COILS); IPR006560 (SMART); IPR001214 (SMART); IPR003616 (SMART); IPR001214 (PFAM); G3DSA:2.170.270.10 (GENE3D); IPR013257 (PFAM); IPR038190 (G3DSA:1.10.1740.GENE3D); mobidb-lite (MOBIDB_LITE); mobidb-lite (MOBIDB_LITE); mobidb-lite (MOBIDB_LITE); mobidb-lite (MOBIDB_LITE); mobidb-lite (MOBIDB_LITE); mobidb-lite (MOBIDB_LITE); mobidb-lite (MOBIDB_LITE); PTHR22884:SF468 (PANTHER…	F:GO:0005515; C:GO:0005634; C:GO:0005694; P:GO:0006355; F:GO:0018024; P:GO:0034968	F:protein binding; C:nucleus; C:chromosome; P:regulation of transcription, DNA-templated; F:histone-lysine N-methyltransferase activity; P:histone lysine methylation
TRUE	[INTERPRO, BLASTED, MAPPED, GO-SLIM]	DERPT_G4120	: Full=Polycomb eed	698	20	8.9677e-80	49.66	15	P:GO:0000003; C:GO:0000228; F:GO:0003677; C:GO:0005654; P:GO:0006464; P:GO:0006520; F:GO:0008168; P:GO:0009056; P:GO:0009056; P:GO:0009058; P:GO:0030154; C:GO:0032991; P:GO:0034641; P:GO:0048856; P:GO:0051276	P:reproduction; C:nuclear chromosome; F:DNA binding; C:nucleoplasm; P:cellular protein modification process; P:cellular amino acid metabolic process; F:methyltransferase activity; P:catabolic process; P:catabolic process; P:biosynthetic process; P:cell differentiation; C:protein-containing complex; P:cellular nitrogen compound metabolic process; P:anatomical structure development; P:chromosome or…	EC:2.1.1.43	Histone-lysine N-methyltransferase	IPR001680 (SMART); IPR015943 (G3DSA:2.130.10.GENE3D); IPR001680 (PFAM); mobidb-lite (MOBIDB_LITE); IPR037352 (PANTHER); PTHR10253:SF5 (PANTHER); IPR019775 (PROSITE_PATTERNS); IPR001680 (PROSITE_PROFILES); IPR001680 (PROSITE_PROFILES); IPR017986 (PROSITE_PROFILES); IPR036322 (SUPERFAMILY)	F:GO:0005515; P:GO:0016571; C:GO:0035098	F:protein binding; P:histone methylation; C:ESC/E(Z) complex
TRUE	[INTERPRO, BLASTED, MAPPED, GO-SLIM]	DERPT_G3471	: Full=Mitochondrial import inner membrane translocase subunit TIM44 Flags: Precursor	4114	20	4.75756e-150	61.4	27	P:GO:0000003; F:GO:0000988; P:GO:0002376; F:GO:0003677; C:GO:0005576; C:GO:0005654; C:GO:0005694; C:GO:0005739; C:GO:0005794; P:GO:0006259; P:GO:0006464; P:GO:0006605; P:GO:0006950; P:GO:0007005; P:GO:0007165; F:GO:0008134; F:GO:0008168; P:GO:0009058; P:GO:0009790; F:GO:0019899; P:GO:0030154; C:GO:0032991; F:GO:0043167; P:GO:0048646; P:GO:0048870; P:GO:0051276; P:GO:0055085	P:reproduction; F:obsolete transcription factor activity, protein binding; P:immune system process; F:DNA binding; C:extracellular region; C:nucleoplasm; C:chromosome; C:mitochondrion; C:Golgi apparatus; P:DNA metabolic process; P:cellular protein modification process; P:protein targeting; P:response to stress; P:mitochondrion organization; P:signal transduction; F:transcription factor binding; F…	EC:2.1.1.43	Histone-lysine N-methyltransferase	Coil (COILS); Coil (COILS); IPR007379 (SMART); IPR001214 (SMART); IPR001025 (SMART); IPR001965 (SMART); IPR003616 (SMART); IPR006560 (SMART); G3DSA:3.10.450.240 (GENE3D); IPR001025 (PFAM); IPR001214 (PFAM); G3DSA:2.170.270.10 (GENE3D); IPR013083 (G3DSA:3.30.40.GENE3D); IPR007379 (PFAM); IPR019787 (PFAM); mobidb-lite (MOBIDB_LITE); mobidb-lite (MOBIDB_LITE); mobidb-lite (MOBIDB_LITE); mobidb-lite …	F:GO:0003682; F:GO:0005515; C:GO:0005634; F:GO:0018024	F:chromatin binding; F:protein binding; C:nucleus; F:histone-lysine N-methyltransferase activity
TRUE	[INTERPRO, BLASTED, MAPPED, GO-SLIM]	DERPT_G142	: Full=WD repeat-containing 5B	410	20	0	78.53	30	P:GO:0000003; P:GO:0000278; P:GO:0000278; C:GO:0005634; C:GO:0005654; C:GO:0005737; C:GO:0005856; C:GO:0005886; P:GO:0005975; P:GO:0005975; P:GO:0006464; P:GO:0006950; P:GO:0007165; P:GO:0007568; F:GO:0008134; F:GO:0008168; P:GO:0008219; P:GO:0009056; P:GO:0009058; P:GO:0009058; P:GO:0009790; F:GO:0016746; P:GO:0030154; C:GO:0032991; P:GO:0034641; P:GO:0040007; F:GO:0042393; P:GO:0044281; P:GO:00…	P:reproduction; P:mitotic cell cycle; P:mitotic cell cycle; C:nucleus; C:nucleoplasm; C:cytoplasm; C:cytoskeleton; C:plasma membrane; P:carbohydrate metabolic process; P:carbohydrate metabolic process; P:cellular protein modification process; P:response to stress; P:signal transduction; P:aging; F:transcription factor binding; F:methyltransferase activity; P:cell death; P:catabolic process; P:bio…	EC:2.1.1.43; EC:2.3.1.48	Histone-lysine N-methyltransferase; Histone acetyltransferase	IPR020472 (PRINTS); IPR001680 (SMART); PIRSF002394 (PIRSF); IPR015943 (G3DSA:2.130.10.GENE3D); IPR001680 (PFAM); mobidb-lite (MOBIDB_LITE); PTHR22847 (PANTHER); IPR037834 (PTHR22847:PANTHER); IPR019775 (PROSITE_PATTERNS); IPR019775 (PROSITE_PATTERNS); IPR019775 (PROSITE_PATTERNS); IPR019775 (PROSITE_PATTERNS); IPR019775 (PROSITE_PATTERNS); IPR001680 (PROSITE_PROFILES); IPR001680 (PROSITE_PROFILES…	F:GO:0005515	F:protein binding
TRUE	[INTERPRO, BLASTED, MAPPED, GO-SLIM]	DERPT_G10008	: Full=Histone-lysine N- H3 lysine-4 specific ame: Full=COMPASS component SET1 ame: Full=SET domain-containing 1	4268	20	0	63.47	31	P:GO:0000003; P:GO:0000902; F:GO:0000988; P:GO:0002376; F:GO:0003677; F:GO:0003723; C:GO:0005634; C:GO:0005654; C:GO:0005694; C:GO:0005856; P:GO:0006259; P:GO:0006464; P:GO:0006950; P:GO:0007049; P:GO:0007165; P:GO:0007568; F:GO:0008168; P:GO:0008283; P:GO:0009058; P:GO:0009790; F:GO:0016746; F:GO:0019899; P:GO:0030154; C:GO:0032991; P:GO:0040007; P:GO:0042592; F:GO:0043167; P:GO:0048646; P:GO:00…	P:reproduction; P:cell morphogenesis; F:obsolete transcription factor activity, protein binding; P:immune system process; F:DNA binding; F:RNA binding; C:nucleus; C:nucleoplasm; C:chromosome; C:cytoskeleton; P:DNA metabolic process; P:cellular protein modification process; P:response to stress; P:cell cycle; P:signal transduction; P:aging; F:methyltransferase activity; P:cell proliferation; P:bio…	EC:2.1.1.43; EC:2.3.1.48	Histone-lysine N-methyltransferase; Histone acetyltransferase	Coil (COILS); Coil (COILS); Coil (COILS); IPR001965 (SMART); IPR003889 (SMART); IPR003616 (SMART); IPR003888 (SMART); IPR001214 (SMART); IPR019787 (PFAM); IPR003889 (PFAM); IPR013083 (G3DSA:3.30.40.GENE3D); G3DSA:2.60.120.650 (GENE3D); G3DSA:2.170.270.10 (GENE3D); IPR003888 (PFAM); IPR013083 (G3DSA:3.30.40.GENE3D); IPR036910 (G3DSA:1.10.30.GENE3D); IPR001214 (PFAM); IPR013083 (G3DSA:3.30.40.GENE3…	F:GO:0005515; C:GO:0005634; F:GO:0042800; C:GO:0044666	F:protein binding; C:nucleus; F:histone methyltransferase activity (H3-K4 specific); C:MLL3/4 complex
TRUE	[INTERPRO, BLASTED, MAPPED, GO-SLIM]	DERPT_G6600	: Full=Myotrophin	125	20	1.22662e-33	60.49	27	P:GO:0000003; C:GO:0000228; F:GO:0003677; C:GO:0005576; C:GO:0005635; C:GO:0005815; C:GO:0005829; P:GO:0006259; P:GO:0006412; P:GO:0006464; P:GO:0006520; P:GO:0007010; P:GO:0007049; P:GO:0007165; P:GO:0007267; F:GO:0008168; P:GO:0009056; P:GO:0009056; F:GO:0016757; F:GO:0019899; P:GO:0030154; C:GO:0032991; P:GO:0040007; P:GO:0042592; P:GO:0048856; P:GO:0051276; P:GO:0065003	P:reproduction; C:nuclear chromosome; F:DNA binding; C:extracellular region; C:nuclear envelope; C:microtubule organizing center; C:cytosol; P:DNA metabolic process; P:translation; P:cellular protein modification process; P:cellular amino acid metabolic process; P:cytoskeleton organization; P:cell cycle; P:signal transduction; P:cell-cell signaling; F:methyltransferase activity; P:catabolic proce…	EC:2.1.1.43; EC:2.4.2.30	Histone-lysine N-methyltransferase; NAD(+) ADP-ribosyltransferase	IPR002110 (PRINTS); IPR002110 (SMART); IPR036770 (G3DSA:1.25.40.GENE3D); PF13637 (PFAM); PTHR24189 (PANTHER); IPR002110 (PROSITE_PROFILES); IPR002110 (PROSITE_PROFILES); IPR020683 (PROSITE_PROFILES); IPR020683 (CDD); IPR036770 (SUPERFAMILY)	F:GO:0005515	F:protein binding
TRUE	[INTERPRO, BLASTED, MAPPED, GO-SLIM]	DERPT_G5431	: Full=Thymidylate synthase Short=TS Short=TSase	289	20	1.25896e-155	79.79	13	F:GO:0003729; C:GO:0005730; C:GO:0005739; P:GO:0006412; F:GO:0008168; C:GO:0009536; F:GO:0016491; P:GO:0030154; F:GO:0043167; P:GO:0044281; P:GO:0048856; P:GO:0050877; P:GO:0051186	F:mRNA binding; C:nucleolus; C:mitochondrion; P:translation; F:methyltransferase activity; C:plastid; F:oxidoreductase activity; P:cell differentiation; F:ion binding; P:small molecule metabolic process; P:anatomical structure development; P:nervous system process; P:cofactor metabolic process	EC:2.1.1.45; EC:1.5.1.3	Thymidylate synthase; Dihydrofolate reductase	IPR000398 (PRINTS); IPR023451 (PFAM); IPR000398 (TIGRFAM); IPR036926 (G3DSA:3.30.572.GENE3D); PTHR11548 (PANTHER); IPR020940 (PROSITE_PATTERNS); IPR000398 (HAMAP); IPR023451 (CDD); IPR036926 (SUPERFAMILY)	F:GO:0004799; P:GO:0006231	F:thymidylate synthase activity; P:dTMP biosynthetic process
TRUE	[INTERPRO, BLASTED, MAPPED, GO-SLIM]	DERPT_G7587	: Full= -L-isoaspartate(D-aspartate) O-methyltransferase Short=PIMT ame: Full=L-isoaspartyl carboxyl methyltransferase ame: Full= L-isoaspartyl D-aspartyl methyltransferase ame: Full= -beta-aspartate methyltransferase	270	20	1.55839e-100	69.5	15	C:GO:0005615; C:GO:0005634; C:GO:0005829; C:GO:0005886; P:GO:0006464; P:GO:0006520; P:GO:0006790; P:GO:0006914; P:GO:0006950; P:GO:0007568; F:GO:0008168; P:GO:0008219; P:GO:0034641; P:GO:0048856; P:GO:0051186	C:extracellular space; C:nucleus; C:cytosol; C:plasma membrane; P:cellular protein modification process; P:cellular amino acid metabolic process; P:sulfur compound metabolic process; P:autophagy; P:response to stress; P:aging; F:methyltransferase activity; P:cell death; P:cellular nitrogen compound metabolic process; P:anatomical structure development; P:cofactor metabolic process	EC:2.1.1.77	Protein-L-isoaspartate(D-aspartate) O-methyltransferase	IPR000682 (TIGRFAM); PF01135 (PFAM); G3DSA:3.40.50.150 (GENE3D); IPR000682 (PANTHER); PTHR11579:SF6 (PANTHER); cd02440 (CDD); IPR029063 (SUPERFAMILY)	F:GO:0004719; P:GO:0006464	F:protein-L-isoaspartate (D-aspartate) O-methyltransferase activity; P:cellular protein modification process
TRUE	[INTERPRO, BLASTED, MAPPED, GO-SLIM]	DERPT_G4431	: Full=Serine cytosolic Short=SHMT ame: Full=Glycine hydroxymethyltransferase ame: Full=Serine methylase	1927	20	4.70708e-137	65.5	15	F:GO:0003729; F:GO:0004386; C:GO:0005730; C:GO:0005739; C:GO:0005777; C:GO:0005829; C:GO:0005886; P:GO:0006520; P:GO:0009058; P:GO:0009058; C:GO:0009536; C:GO:0032991; P:GO:0034641; F:GO:0043167; P:GO:0051186	F:mRNA binding; F:helicase activity; C:nucleolus; C:mitochondrion; C:peroxisome; C:cytosol; C:plasma membrane; P:cellular amino acid metabolic process; P:biosynthetic process; P:biosynthetic process; C:plastid; C:protein-containing complex; P:cellular nitrogen compound metabolic process; F:ion binding; P:cofactor metabolic process	EC:2.1.2.1; EC:3.6.1.15	Glycine hydroxymethyltransferase; Nucleoside-triphosphate phosphatase	IPR001650 (SMART); IPR014001 (SMART); IPR015422 (G3DSA:3.90.1150.GENE3D); G3DSA:3.40.50.300 (GENE3D); IPR011545 (PFAM); G3DSA:3.40.50.300 (GENE3D); IPR001650 (PFAM); G3DSA:1.10.238.10 (GENE3D); IPR015421 (G3DSA:3.40.640.GENE3D); PF00464 (PFAM); mobidb-lite (MOBIDB_LITE); mobidb-lite (MOBIDB_LITE); mobidb-lite (MOBIDB_LITE); PTHR11680 (PANTHER); PTHR11680:SF21 (PANTHER); IPR019798 (PROSITE_PATTERN…	F:GO:0003676; F:GO:0003824; F:GO:0004372; F:GO:0005524; P:GO:0019264; F:GO:0030170; P:GO:0035999	F:nucleic acid binding; F:catalytic activity; F:glycine hydroxymethyltransferase activity; F:ATP binding; P:glycine biosynthetic process from serine; F:pyridoxal phosphate binding; P:tetrahydrofolate interconversion
TRUE	[INTERPRO, BLASTED, MAPPED, GO-SLIM]	DERPT_G5473	: Full=Glycine cleavage system H	137	20	2.20917e-48	72.41	12	F:GO:0005198; C:GO:0005739; P:GO:0006520; F:GO:0008168; P:GO:0009056; P:GO:0009056; F:GO:0016491; F:GO:0019899; P:GO:0030198; C:GO:0031012; F:GO:0043167; P:GO:0048856	F:structural molecule activity; C:mitochondrion; P:cellular amino acid metabolic process; F:methyltransferase activity; P:catabolic process; P:catabolic process; F:oxidoreductase activity; F:enzyme binding; P:extracellular matrix organization; C:extracellular matrix; F:ion binding; P:anatomical structure development	EC:2.1.2.10; EC:1.4.4.2	Aminomethyltransferase; Glycine dehydrogenase (aminomethyl-transferring)	IPR017453 (TIGRFAM); IPR033753 (PFAM); G3DSA:2.40.50.100 (GENE3D); PTHR11715:SF3 (PANTHER); IPR002930 (PANTHER); IPR003016 (PROSITE_PATTERNS); IPR000089 (PROSITE_PROFILES); IPR002930 (HAMAP); IPR033753 (CDD); IPR011053 (SUPERFAMILY)	C:GO:0005960; P:GO:0019464	C:glycine cleavage complex; P:glycine decarboxylation via glycine cleavage system
TRUE	[INTERPRO, BLASTED, MAPPED, GO-SLIM]	DERPT_G3121	: Full= mitochondrial ame: Full=Glycine cleavage system T Short=GCVT Flags: Precursor	415	20	2.2753e-122	62.04	13	C:GO:0005576; C:GO:0005739; C:GO:0005829; C:GO:0005840; P:GO:0006520; F:GO:0008168; F:GO:0008289; P:GO:0009056; P:GO:0009056; C:GO:0009536; C:GO:0009579; F:GO:0016491; F:GO:0043167	C:extracellular region; C:mitochondrion; C:cytosol; C:ribosome; P:cellular amino acid metabolic process; F:methyltransferase activity; F:lipid binding; P:catabolic process; P:catabolic process; C:plastid; C:thylakoid; F:oxidoreductase activity; F:ion binding	EC:2.1.2.10; EC:1.4.4.2	Aminomethyltransferase; Glycine dehydrogenase (aminomethyl-transferring)	Coil (COILS); IPR006222 (PFAM); G3DSA:4.10.1250.10 (GENE3D); IPR027266 (G3DSA:3.30.1360.GENE3D); G3DSA:2.40.30.110 (GENE3D); IPR013977 (PFAM); IPR028896 (PIRSF); IPR006223 (TIGRFAM); G3DSA:3.30.70.1400 (GENE3D); PTHR43757:SF2 (PANTHER); PTHR43757 (PANTHER); IPR029043 (SUPERFAMILY); SSF103025 (SUPERFAMILY)	F:GO:0004047; F:GO:0005515; P:GO:0006546	F:aminomethyltransferase activity; F:protein binding; P:glycine catabolic process
TRUE	[INTERPRO, BLASTED, MAPPED, GO-SLIM]	DERPT_G3573	: Full=Trifunctional purine biosynthetic adenosine-3 Includes: ame: Full=Phosphoribosylamine--glycine ligase ame: Full=Glycinamide ribonucleotide synthetase Short=GARS ame: Full=Phosphoribosylglycinamide synthetase Includes: ame: Full=Phosphoribosylformylglycinamidine cyclo-ligase ame: Full=AIR synthase Short=AIRS ame: Full=Phosphoribosyl-aminoimidazole synthetase Includes: ame: Full=Phosphoribos…	2959	20	0	63.33	12	C:GO:0005576; C:GO:0005737; P:GO:0006464; P:GO:0006520; F:GO:0008233; P:GO:0009058; P:GO:0009058; F:GO:0016874; P:GO:0034641; F:GO:0043167; C:GO:0043226; P:GO:0051186	C:extracellular region; C:cytoplasm; P:cellular protein modification process; P:cellular amino acid metabolic process; F:peptidase activity; P:biosynthetic process; P:biosynthetic process; F:ligase activity; P:cellular nitrogen compound metabolic process; F:ion binding; C:organelle; P:cofactor metabolic process	EC:2.1.2.2; EC:6.3.4.13; EC:6.3.3.1; EC:3.4.19.12	Phosphoribosylglycinamide formyltransferase; Phosphoribosylamine--glycine ligase; Phosphoribosylformylglycinamidine cyclo-ligase; Ubiquitinyl hydrolase 1	Coil (COILS); IPR013087 (SMART); SM01209 (SMART); IPR020560 (SMART); G3DSA:3.40.50.20 (GENE3D); IPR016188 (PFAM); IPR020560 (PFAM); IPR020562 (PFAM); IPR010918 (PFAM); IPR020561 (PFAM); G3DSA:3.40.50.170 (GENE3D); G3DSA:3.30.470.20 (GENE3D); IPR000115 (TIGRFAM); G3DSA:3.30.160.60 (GENE3D); PF00096 (PFAM); IPR037123 (G3DSA:3.90.600.GENE3D); IPR036676 (G3DSA:3.90.650.GENE3D); IPR001394 (PFAM); IPR0…	F:GO:0003676; F:GO:0004637; F:GO:0004641; F:GO:0004644; F:GO:0005515; F:GO:0005524; C:GO:0005737; P:GO:0006189; P:GO:0006511; P:GO:0009058; P:GO:0009113; P:GO:0016579; F:GO:0016742; F:GO:0036459; F:GO:0046872	F:nucleic acid binding; F:phosphoribosylamine-glycine ligase activity; F:phosphoribosylformylglycinamidine cyclo-ligase activity; F:phosphoribosylglycinamide formyltransferase activity; F:protein binding; F:ATP binding; C:cytoplasm; P:'de novo' IMP biosynthetic process; P:ubiquitin-dependent protein catabolic process; P:biosynthetic process; P:purine nucleobase biosynthetic process; P:protein deu…
TRUE	[INTERPRO, BLASTED, MAPPED, GO-SLIM]	DERPT_G1150	: Full=Glutamate formimidoyltransferase ame: Full=5-formyltetrahydrofolate cyclo-ligase ame: Full=Glutamate formiminotransferase ame: Full=Glutamate formyltransferase	544	10	0	66.6	14	C:GO:0005576; C:GO:0005783; C:GO:0005794; C:GO:0005829; C:GO:0005856; P:GO:0006520; P:GO:0007010; F:GO:0008092; P:GO:0009056; P:GO:0009056; F:GO:0016829; C:GO:0032991; P:GO:0034641; F:GO:0043167	C:extracellular region; C:endoplasmic reticulum; C:Golgi apparatus; C:cytosol; C:cytoskeleton; P:cellular amino acid metabolic process; P:cytoskeleton organization; F:cytoskeletal protein binding; P:catabolic process; P:catabolic process; F:lyase activity; C:protein-containing complex; P:cellular nitrogen compound metabolic process; F:ion binding	EC:2.1.2.5; EC:4.3.1.4	Glutamate formimidoyltransferase; Formimidoyltetrahydrofolate cyclodeaminase	IPR012886 (SMART); IPR013802 (SMART); IPR004227 (TIGRFAM); IPR037070 (G3DSA:3.30.70.GENE3D); IPR036178 (G3DSA:1.20.120.GENE3D); IPR037064 (G3DSA:3.30.990.GENE3D); IPR013802 (PFAM); IPR012886 (PFAM); IPR007044 (PFAM); PTHR12234:SF0 (PANTHER); PTHR12234 (PANTHER); IPR022384 (SUPERFAMILY); IPR022384 (SUPERFAMILY); IPR036178 (SUPERFAMILY)	F:GO:0003824; F:GO:0005542; P:GO:0008152; F:GO:0016740; P:GO:0044237	F:catalytic activity; F:folic acid binding; P:metabolic process; F:transferase activity; P:cellular metabolic process
TRUE	[INTERPRO, BLASTED, MAPPED, GO-SLIM]	DERPT_G1426	: Full=Molybdopterin molybdenumtransferase Short=MPT Mo-transferase	626	20	2.38056e-106	53.07	12	C:GO:0005829; C:GO:0005886; P:GO:0007165; P:GO:0009058; P:GO:0009058; F:GO:0016779; P:GO:0034641; F:GO:0043167; P:GO:0044281; P:GO:0051186; P:GO:0061024; P:GO:0061024	C:cytosol; C:plasma membrane; P:signal transduction; P:biosynthetic process; P:biosynthetic process; F:nucleotidyltransferase activity; P:cellular nitrogen compound metabolic process; F:ion binding; P:small molecule metabolic process; P:cofactor metabolic process; P:membrane organization; P:membrane organization	EC:2.10.1.1; EC:2.7.7.75	Molybdopterin molybdotransferase; Molybdopterin adenylyltransferase	IPR001453 (SMART); IPR005111 (PFAM); G3DSA:2.170.190.11 (GENE3D); IPR001453 (TIGRFAM); IPR036425 (G3DSA:3.40.980.GENE3D); IPR001453 (PFAM); IPR036688 (G3DSA:2.40.340.GENE3D); IPR036425 (G3DSA:3.40.980.GENE3D); G3DSA:3.90.105.10 (GENE3D); IPR005110 (PFAM); PTHR10192:SF5 (PANTHER); IPR038987 (PANTHER); IPR038987 (PANTHER); PTHR10192:SF5 (PANTHER); IPR008284 (PROSITE_PATTERNS); IPR038987 (CDD); IPR0…	P:GO:0006777; P:GO:0032324	P:Mo-molybdopterin cofactor biosynthetic process; P:molybdopterin cofactor biosynthetic process
TRUE	[INTERPRO, BLASTED, MAPPED, GO-SLIM]	DERPT_G8420	: Full=Transketolase Short=TK	623	20	0	65.86	16	C:GO:0005576; C:GO:0005654; C:GO:0005777; C:GO:0005783; P:GO:0005975; P:GO:0005975; P:GO:0006790; P:GO:0009056; P:GO:0009056; P:GO:0009058; P:GO:0009058; P:GO:0034641; P:GO:0040007; F:GO:0043167; P:GO:0044281; P:GO:0051186	C:extracellular region; C:nucleoplasm; C:peroxisome; C:endoplasmic reticulum; P:carbohydrate metabolic process; P:carbohydrate metabolic process; P:sulfur compound metabolic process; P:catabolic process; P:catabolic process; P:biosynthetic process; P:biosynthetic process; P:cellular nitrogen compound metabolic process; P:growth; F:ion binding; P:small molecule metabolic process; P:cofactor metabo…	EC:2.2.1.1	Transketolase	IPR005475 (SMART); IPR005474 (PFAM); IPR033248 (PFAM); G3DSA:3.40.50.970 (GENE3D); IPR009014 (G3DSA:3.40.50.GENE3D); G3DSA:3.40.50.970 (GENE3D); IPR005475 (PFAM); PTHR43195:SF1 (PANTHER); PTHR43195 (PANTHER); IPR020826 (PROSITE_PATTERNS); cd07033 (CDD); cd02012 (CDD); IPR009014 (SUPERFAMILY); IPR029061 (SUPERFAMILY); IPR029061 (SUPERFAMILY)	F:GO:0003824; P:GO:0008152	F:catalytic activity; P:metabolic process
TRUE	[INTERPRO, BLASTED, MAPPED, GO-SLIM]	DERPT_G4688	: Full=Transketolase Short=TK	673	20	4.10005e-168	57.16	7	F:GO:0003674; C:GO:0005634; P:GO:0006950; C:GO:0009536; P:GO:0034641; P:GO:0044281; P:GO:0051186	F:molecular_function; C:nucleus; P:response to stress; C:plastid; P:cellular nitrogen compound metabolic process; P:small molecule metabolic process; P:cofactor metabolic process	EC:2.2.1.1	Transketolase	IPR005475 (SMART); IPR009014 (G3DSA:3.40.50.GENE3D); IPR005475 (PFAM); IPR005474 (PFAM); G3DSA:3.40.50.970 (GENE3D); G3DSA:3.40.50.970 (GENE3D); PTHR43522:SF2 (PANTHER); IPR033247 (PANTHER); IPR005474 (PROSITE_PATTERNS); IPR020826 (PROSITE_PATTERNS); cd02012 (CDD); cd07033 (CDD); IPR009014 (SUPERFAMILY); IPR029061 (SUPERFAMILY); IPR029061 (SUPERFAMILY)	F:GO:0003824; P:GO:0008152	F:catalytic activity; P:metabolic process
TRUE	[INTERPRO, BLASTED, MAPPED, MANUAL, GO-SLIM]	DERPT_G10227	Proposed Stren-Allergen: Full=Transaldolase	326	20	1.25566e-141	74.24	10	F:GO:0003674; C:GO:0005576; C:GO:0005634; C:GO:0005829; P:GO:0005975; P:GO:0006950; P:GO:0007568; P:GO:0034641; P:GO:0044281; P:GO:0051186	F:molecular_function; C:extracellular region; C:nucleus; C:cytosol; P:carbohydrate metabolic process; P:response to stress; P:aging; P:cellular nitrogen compound metabolic process; P:small molecule metabolic process; P:cofactor metabolic process	EC:2.2.1.2	Transaldolase	IPR001585 (PFAM); IPR013785 (G3DSA:3.20.20.GENE3D); IPR004730 (TIGRFAM); IPR004730 (PTHR10683:PANTHER); IPR001585 (PANTHER); IPR018225 (PROSITE_PATTERNS); IPR018225 (PROSITE_PATTERNS); IPR004730 (HAMAP); IPR004730 (CDD); SSF51569 (SUPERFAMILY)	F:GO:0003824; F:GO:0004801; C:GO:0005737; P:GO:0005975; P:GO:0006098	F:catalytic activity; F:sedoheptulose-7-phosphate:D-glyceraldehyde-3-phosphate glyceronetransferase activity; C:cytoplasm; P:carbohydrate metabolic process; P:pentose-phosphate shunt
TRUE	[INTERPRO, BLASTED, MAPPED, GO-SLIM]	DERPT_G1570	: Full=Dihydrolipoyllysine-residue acetyltransferase component of pyruvate dehydrogenase complex ame: Full=Dihydrolipoamide acetyltransferase component of pyruvate dehydrogenase complex ame: Full=E2	514	20	1.0133e-175	63.02	16	C:GO:0005739; P:GO:0005975; P:GO:0005975; P:GO:0006091; P:GO:0006790; P:GO:0009056; P:GO:0009056; P:GO:0009058; P:GO:0009058; C:GO:0009536; F:GO:0016491; F:GO:0016746; P:GO:0034641; F:GO:0043167; P:GO:0044281; P:GO:0051186	C:mitochondrion; P:carbohydrate metabolic process; P:carbohydrate metabolic process; P:generation of precursor metabolites and energy; P:sulfur compound metabolic process; P:catabolic process; P:catabolic process; P:biosynthetic process; P:biosynthetic process; C:plastid; F:oxidoreductase activity; F:transferase activity, transferring acyl groups; P:cellular nitrogen compound metabolic process; F…	EC:2.3.1.12	Dihydrolipoyllysine-residue acetyltransferase	IPR006257 (TIGRFAM); IPR001078 (PFAM); IPR036625 (G3DSA:4.10.320.GENE3D); IPR000089 (PFAM); G3DSA:2.40.50.100 (GENE3D); IPR004167 (PFAM); IPR023213 (G3DSA:3.30.559.GENE3D); mobidb-lite (MOBIDB_LITE); PTHR23151 (PANTHER); PTHR23151:SF9 (PANTHER); IPR003016 (PROSITE_PATTERNS); IPR004167 (PROSITE_PROFILES); IPR000089 (PROSITE_PROFILES); cd06849 (CDD); IPR036625 (SUPERFAMILY); SSF52777 (SUPERFAMILY);…	F:GO:0004742; P:GO:0006090; P:GO:0008152; F:GO:0016746; C:GO:0045254	F:dihydrolipoyllysine-residue acetyltransferase activity; P:pyruvate metabolic process; P:metabolic process; F:transferase activity, transferring acyl groups; C:pyruvate dehydrogenase complex
TRUE	[INTERPRO, BLASTED, MAPPED, GO-SLIM]	DERPT_G1499	: Full=Dihydrolipoyllysine-residue acetyltransferase component of pyruvate dehydrogenase complex ame: Full=Dihydrolipoamide acetyltransferase component of pyruvate dehydrogenase complex ame: Full=E2	435	20	2.29701e-110	57.24	16	C:GO:0005739; P:GO:0005975; P:GO:0005975; P:GO:0006091; P:GO:0006790; P:GO:0009056; P:GO:0009056; P:GO:0009058; P:GO:0009058; C:GO:0009536; F:GO:0016491; F:GO:0016746; P:GO:0034641; F:GO:0043167; P:GO:0044281; P:GO:0051186	C:mitochondrion; P:carbohydrate metabolic process; P:carbohydrate metabolic process; P:generation of precursor metabolites and energy; P:sulfur compound metabolic process; P:catabolic process; P:catabolic process; P:biosynthetic process; P:biosynthetic process; C:plastid; F:oxidoreductase activity; F:transferase activity, transferring acyl groups; P:cellular nitrogen compound metabolic process; F…	EC:2.3.1.12	Dihydrolipoyllysine-residue acetyltransferase	IPR023213 (G3DSA:3.30.559.GENE3D); IPR036625 (G3DSA:4.10.320.GENE3D); IPR001078 (PFAM); G3DSA:2.40.50.100 (GENE3D); IPR004167 (PFAM); IPR000089 (PFAM); PTHR23151:SF57 (PANTHER); PTHR23151 (PANTHER); IPR003016 (PROSITE_PATTERNS); IPR000089 (PROSITE_PROFILES); IPR004167 (PROSITE_PROFILES); cd06849 (CDD); SSF52777 (SUPERFAMILY); IPR036625 (SUPERFAMILY); IPR011053 (SUPERFAMILY)	P:GO:0008152; F:GO:0016746	P:metabolic process; F:transferase activity, transferring acyl groups
TRUE	[INTERPRO, BLASTED, MAPPED, GO-SLIM]	DERPT_G4146	: Full=Probable acetyl- acyltransferase ame: Full=Acetoacetyl- thiolase	399	20	6.51716e-175	67.55	18	C:GO:0005576; C:GO:0005739; P:GO:0006520; P:GO:0006629; P:GO:0006790; P:GO:0006810; P:GO:0006950; P:GO:0007005; P:GO:0007165; P:GO:0008219; P:GO:0009056; P:GO:0009056; P:GO:0009058; P:GO:0009058; F:GO:0016746; P:GO:0051186; P:GO:0061024; P:GO:0061024	C:extracellular region; C:mitochondrion; P:cellular amino acid metabolic process; P:lipid metabolic process; P:sulfur compound metabolic process; P:transport; P:response to stress; P:mitochondrion organization; P:signal transduction; P:cell death; P:catabolic process; P:catabolic process; P:biosynthetic process; P:biosynthetic process; F:transferase activity, transferring acyl groups; P:cofactor …	EC:2.3.1.16	Acetyl-CoA C-acyltransferase	IPR016039 (G3DSA:3.40.47.GENE3D); IPR002155 (TIGRFAM); IPR020617 (PFAM); IPR020616 (PFAM); IPR016039 (G3DSA:3.40.47.GENE3D); IPR002155 (PIRSF); PTHR18919:SF107 (PANTHER); PTHR18919 (PANTHER); IPR020615 (PROSITE_PATTERNS); IPR020613 (PROSITE_PATTERNS); IPR020610 (PROSITE_PATTERNS); IPR002155 (CDD); IPR016039 (SUPERFAMILY); IPR016039 (SUPERFAMILY)	F:GO:0003824; P:GO:0008152; F:GO:0016747	F:catalytic activity; P:metabolic process; F:transferase activity, transferring acyl groups other than amino-acyl groups
TRUE	[INTERPRO, BLASTED, MAPPED, GO-SLIM]	DERPT_G508	: Full=Acetyl- mitochondrial ame: Full=Acetoacetyl- thiolase Flags: Precursor	416	20	1.77545e-152	67.59	24	P:GO:0000003; P:GO:0000902; C:GO:0005576; C:GO:0005634; C:GO:0005739; C:GO:0005777; C:GO:0005829; C:GO:0005886; P:GO:0006520; P:GO:0006629; P:GO:0006790; P:GO:0009056; P:GO:0009056; P:GO:0009058; P:GO:0009058; F:GO:0016746; F:GO:0016829; F:GO:0016874; F:GO:0019899; P:GO:0030154; P:GO:0034641; P:GO:0040007; P:GO:0051186; P:GO:0065003	P:reproduction; P:cell morphogenesis; C:extracellular region; C:nucleus; C:mitochondrion; C:peroxisome; C:cytosol; C:plasma membrane; P:cellular amino acid metabolic process; P:lipid metabolic process; P:sulfur compound metabolic process; P:catabolic process; P:catabolic process; P:biosynthetic process; P:biosynthetic process; F:transferase activity, transferring acyl groups; F:lyase activity; F:…	EC:2.3.1.16; EC:2.3.1.9	Acetyl-CoA C-acyltransferase; Acetyl-CoA C-acetyltransferase	IPR020616 (PFAM); IPR002155 (TIGRFAM); IPR016039 (G3DSA:3.40.47.GENE3D); IPR020617 (PFAM); IPR016039 (G3DSA:3.40.47.GENE3D); IPR002155 (PIRSF); PTHR18919:SF81 (PANTHER); PTHR18919 (PANTHER); IPR020610 (PROSITE_PATTERNS); IPR020613 (PROSITE_PATTERNS); IPR002155 (CDD); IPR016039 (SUPERFAMILY); IPR016039 (SUPERFAMILY)	F:GO:0003824; P:GO:0008152; F:GO:0016747	F:catalytic activity; P:metabolic process; F:transferase activity, transferring acyl groups other than amino-acyl groups
TRUE	[INTERPRO, BLASTED, MAPPED, GO-SLIM]	DERPT_G4114	: Full=Acetyl- mitochondrial ame: Full=Acetoacetyl- thiolase Flags: Precursor	400	20	8.95299e-177	71.68	24	P:GO:0000003; P:GO:0000902; C:GO:0005576; C:GO:0005634; C:GO:0005739; C:GO:0005777; C:GO:0005829; C:GO:0005886; P:GO:0006520; P:GO:0006629; P:GO:0006790; P:GO:0009056; P:GO:0009056; P:GO:0009058; P:GO:0009058; F:GO:0016746; F:GO:0016829; F:GO:0016874; F:GO:0019899; P:GO:0030154; P:GO:0034641; P:GO:0040007; P:GO:0051186; P:GO:0065003	P:reproduction; P:cell morphogenesis; C:extracellular region; C:nucleus; C:mitochondrion; C:peroxisome; C:cytosol; C:plasma membrane; P:cellular amino acid metabolic process; P:lipid metabolic process; P:sulfur compound metabolic process; P:catabolic process; P:catabolic process; P:biosynthetic process; P:biosynthetic process; F:transferase activity, transferring acyl groups; F:lyase activity; F:…	EC:2.3.1.16; EC:2.3.1.9	Acetyl-CoA C-acyltransferase; Acetyl-CoA C-acetyltransferase	IPR016039 (G3DSA:3.40.47.GENE3D); IPR002155 (PIRSF); IPR020616 (PFAM); IPR016039 (G3DSA:3.40.47.GENE3D); IPR002155 (TIGRFAM); IPR020617 (PFAM); PTHR18919:SF81 (PANTHER); PTHR18919 (PANTHER); IPR020613 (PROSITE_PATTERNS); IPR020610 (PROSITE_PATTERNS); IPR002155 (CDD); IPR016039 (SUPERFAMILY); IPR016039 (SUPERFAMILY)	F:GO:0003824; P:GO:0008152; F:GO:0016747	F:catalytic activity; P:metabolic process; F:transferase activity, transferring acyl groups other than amino-acyl groups
TRUE	[INTERPRO, BLASTED, MAPPED, GO-SLIM]	DERPT_G11710	: Full=Acetyl- mitochondrial ame: Full=Acetoacetyl- thiolase Flags: Precursor	393	20	3.01058e-168	71.49	25	P:GO:0000003; P:GO:0000902; C:GO:0005576; C:GO:0005634; C:GO:0005739; C:GO:0005777; C:GO:0005829; C:GO:0005886; P:GO:0006520; P:GO:0006629; P:GO:0006790; P:GO:0009056; P:GO:0009056; P:GO:0009058; P:GO:0009058; P:GO:0009790; F:GO:0016746; F:GO:0016829; F:GO:0016874; F:GO:0019899; P:GO:0030154; P:GO:0034641; P:GO:0040007; P:GO:0051186; P:GO:0065003	P:reproduction; P:cell morphogenesis; C:extracellular region; C:nucleus; C:mitochondrion; C:peroxisome; C:cytosol; C:plasma membrane; P:cellular amino acid metabolic process; P:lipid metabolic process; P:sulfur compound metabolic process; P:catabolic process; P:catabolic process; P:biosynthetic process; P:biosynthetic process; P:embryo development; F:transferase activity, transferring acyl groups…	EC:2.3.1.16; EC:2.3.1.9	Acetyl-CoA C-acyltransferase; Acetyl-CoA C-acetyltransferase	IPR020617 (PFAM); IPR002155 (TIGRFAM); IPR020616 (PFAM); IPR016039 (G3DSA:3.40.47.GENE3D); IPR002155 (PIRSF); IPR016039 (G3DSA:3.40.47.GENE3D); PTHR18919:SF81 (PANTHER); PTHR18919 (PANTHER); IPR020613 (PROSITE_PATTERNS); IPR020610 (PROSITE_PATTERNS); IPR020615 (PROSITE_PATTERNS); IPR002155 (CDD); IPR016039 (SUPERFAMILY); IPR016039 (SUPERFAMILY)	F:GO:0003824; P:GO:0008152; F:GO:0016747	F:catalytic activity; P:metabolic process; F:transferase activity, transferring acyl groups other than amino-acyl groups
TRUE	[INTERPRO, BLASTED, MAPPED, GO-SLIM]	DERPT_G8366	: Full=Diacylglycerol O-acyltransferase 1 ame: Full=Acyl- retinol O-fatty-acyltransferase Short=ARAT Short=Retinol O-fatty-acyltransferase ame: Full=Diglyceride acyltransferase	498	20	7.98585e-63	47.91	6	C:GO:0005783; P:GO:0006629; P:GO:0009058; P:GO:0009058; F:GO:0016746; P:GO:0044281	C:endoplasmic reticulum; P:lipid metabolic process; P:biosynthetic process; P:biosynthetic process; F:transferase activity, transferring acyl groups; P:small molecule metabolic process	EC:2.3.1.20	Diacylglycerol O-acyltransferase	IPR004299 (PFAM); IPR014371 (PIRSF); mobidb-lite (MOBIDB_LITE); IPR027251 (PTHR10408:PANTHER); IPR014371 (PANTHER); NON_CYTOPLASMIC_DOMAIN (PHOBIUS); NON_CYTOPLASMIC_DOMAIN (PHOBIUS); TRANSMEMBRANE (PHOBIUS); TRANSMEMBRANE (PHOBIUS); NON_CYTOPLASMIC_DOMAIN (PHOBIUS); CYTOPLASMIC_DOMAIN (PHOBIUS); NON_CYTOPLASMIC_DOMAIN (PHOBIUS); CYTOPLASMIC_DOMAIN (PHOBIUS); TRANSMEMBRANE (PHOBIUS); TRANSMEMBRAN…	F:GO:0004144; F:GO:0008374; P:GO:0019432	F:diacylglycerol O-acyltransferase activity; F:O-acyltransferase activity; P:triglyceride biosynthetic process
TRUE	[INTERPRO, BLASTED, MAPPED, GO-SLIM]	DERPT_G7443	: Full=Diacylglycerol O-acyltransferase 2 ame: Full=Acyl- retinol O-fatty-acyltransferase Short=ARAT Short=Retinol O-fatty-acyltransferase ame: Full=Diglyceride acyltransferase 2	270	20	1.107e-85	65.29	12	C:GO:0005739; C:GO:0005783; C:GO:0005811; P:GO:0006629; P:GO:0006790; P:GO:0006810; P:GO:0009058; P:GO:0009058; F:GO:0016746; P:GO:0042592; P:GO:0048856; P:GO:0051186	C:mitochondrion; C:endoplasmic reticulum; C:lipid droplet; P:lipid metabolic process; P:sulfur compound metabolic process; P:transport; P:biosynthetic process; P:biosynthetic process; F:transferase activity, transferring acyl groups; P:homeostatic process; P:anatomical structure development; P:cofactor metabolic process	EC:2.3.1.20; EC:2.3.1.22	Diacylglycerol O-acyltransferase; 2-acylglycerol O-acyltransferase	IPR007130 (PFAM); PTHR12317 (PANTHER); PTHR12317:SF14 (PANTHER); cd07987 (CDD)	F:GO:0016747	F:transferase activity, transferring acyl groups other than amino-acyl groups
TRUE	[INTERPRO, BLASTED, MAPPED, GO-SLIM]	DERPT_G7442	: Full=Diacylglycerol O-acyltransferase 2 ame: Full=Diglyceride acyltransferase 2	624	20	1.31042e-104	64.31	12	C:GO:0005739; C:GO:0005783; C:GO:0005811; P:GO:0006629; P:GO:0006790; P:GO:0006810; P:GO:0009058; P:GO:0009058; F:GO:0016746; P:GO:0042592; P:GO:0048856; P:GO:0051186	C:mitochondrion; C:endoplasmic reticulum; C:lipid droplet; P:lipid metabolic process; P:sulfur compound metabolic process; P:transport; P:biosynthetic process; P:biosynthetic process; F:transferase activity, transferring acyl groups; P:homeostatic process; P:anatomical structure development; P:cofactor metabolic process	EC:2.3.1.20; EC:2.3.1.22	Diacylglycerol O-acyltransferase; 2-acylglycerol O-acyltransferase	IPR007130 (PFAM); PTHR12317 (PANTHER); PTHR12317 (PANTHER); PTHR12317:SF26 (PANTHER); PTHR12317:SF26 (PANTHER); TRANSMEMBRANE (PHOBIUS); NON_CYTOPLASMIC_DOMAIN (PHOBIUS); NON_CYTOPLASMIC_DOMAIN (PHOBIUS); TRANSMEMBRANE (PHOBIUS); CYTOPLASMIC_DOMAIN (PHOBIUS); cd07987 (CDD); cd07987 (CDD); TMhelix (TMHMM); TMhelix (TMHMM)	F:GO:0016747	F:transferase activity, transferring acyl groups other than amino-acyl groups
TRUE	[INTERPRO, BLASTED, MAPPED, GO-SLIM]	DERPT_G3077	: Full=Diacylglycerol O-acyltransferase 1 ame: Full=Acyl- retinol O-fatty-acyltransferase Short=ARAT Short=Retinol O-fatty-acyltransferase ame: Full=Diglyceride acyltransferase	1330	20	1.17481e-124	54.97	9	C:GO:0005783; P:GO:0006629; P:GO:0006790; F:GO:0008289; P:GO:0009058; P:GO:0009058; F:GO:0016746; P:GO:0042592; P:GO:0051186	C:endoplasmic reticulum; P:lipid metabolic process; P:sulfur compound metabolic process; F:lipid binding; P:biosynthetic process; P:biosynthetic process; F:transferase activity, transferring acyl groups; P:homeostatic process; P:cofactor metabolic process	EC:2.3.1.20; EC:2.3.1.22	Diacylglycerol O-acyltransferase; 2-acylglycerol O-acyltransferase	Coil (COILS); IPR019734 (SMART); IPR019412 (PFAM); IPR011990 (G3DSA:1.25.40.GENE3D); IPR004299 (PFAM); mobidb-lite (MOBIDB_LITE); mobidb-lite (MOBIDB_LITE); IPR014371 (PANTHER); IPR027251 (PTHR10408:PANTHER); IPR014371 (PANTHER); IPR027251 (PTHR10408:PANTHER); TRANSMEMBRANE (PHOBIUS); TRANSMEMBRANE (PHOBIUS); CYTOPLASMIC_DOMAIN (PHOBIUS); TRANSMEMBRANE (PHOBIUS); NON_CYTOPLASMIC_DOMAIN (PHOBIUS);…	F:GO:0004144; F:GO:0005515; F:GO:0008374; P:GO:0019432	F:diacylglycerol O-acyltransferase activity; F:protein binding; F:O-acyltransferase activity; P:triglyceride biosynthetic process
TRUE	[INTERPRO, BLASTED, MAPPED, GO-SLIM]	DERPT_G3130	: Full=tRNA N6-adenosine threonylcarbamoyltransferase ame: Full=N6-L-threonylcarbamoyladenine synthase Short=t(6)A synthase ame: Full=t(6)A37 threonylcarbamoyladenosine biosynthesis kae1 ame: Full=tRNA threonylcarbamoyladenosine biosynthesis kae1	680	20	2.3204e-179	79.93	13	C:GO:0000228; F:GO:0003677; C:GO:0005737; P:GO:0006259; P:GO:0006399; P:GO:0006412; F:GO:0016746; P:GO:0030154; C:GO:0032991; P:GO:0042592; F:GO:0043167; P:GO:0048856; P:GO:0051276	C:nuclear chromosome; F:DNA binding; C:cytoplasm; P:DNA metabolic process; P:tRNA metabolic process; P:translation; F:transferase activity, transferring acyl groups; P:cell differentiation; C:protein-containing complex; P:homeostatic process; F:ion binding; P:anatomical structure development; P:chromosome organization	EC:2.3.1.234	N(6)-L-threonylcarbamoyladenine synthase	IPR017861 (PRINTS); IPR001878 (SMART); IPR000571 (SMART); G3DSA:3.30.420.40 (GENE3D); IPR000905 (PFAM); PF15663 (PFAM); G3DSA:4.10.1000.10 (GENE3D); IPR001878 (PFAM); G3DSA:4.10.60.10 (GENE3D); G3DSA:4.10.1000.10 (GENE3D); G3DSA:3.30.420.40 (GENE3D); IPR017861 (TIGRFAM); mobidb-lite (MOBIDB_LITE); IPR034680 (PTHR11735:PANTHER); IPR000905 (PANTHER); IPR001878 (PROSITE_PROFILES); IPR000571 (PROSITE…	C:GO:0000408; P:GO:0002949; F:GO:0003676; F:GO:0008270; F:GO:0046872	C:EKC/KEOPS complex; P:tRNA threonylcarbamoyladenosine modification; F:nucleic acid binding; F:zinc ion binding; F:metal ion binding
TRUE	[INTERPRO, BLASTED, MAPPED, GO-SLIM]	DERPT_G5539	: Full=Histone acetyltransferase KAT7 ame: Full=Histone acetyltransferase binding to ORC1 ame: Full=Lysine acetyltransferase 7 ame: Full= YBF2 SAS2 and TIP60 2 Short=MYST-2	1720	20	6.69769e-88	62.01	25	C:GO:0000228; F:GO:0000988; P:GO:0002376; F:GO:0003729; C:GO:0005654; C:GO:0005737; P:GO:0006259; P:GO:0006464; P:GO:0006520; P:GO:0006950; P:GO:0007049; P:GO:0007165; P:GO:0007267; F:GO:0008134; P:GO:0008219; P:GO:0009056; P:GO:0009056; P:GO:0009058; P:GO:0009790; F:GO:0016746; F:GO:0019899; C:GO:0032991; F:GO:0043167; P:GO:0051276; P:GO:0065003	C:nuclear chromosome; F:obsolete transcription factor activity, protein binding; P:immune system process; F:mRNA binding; C:nucleoplasm; C:cytoplasm; P:DNA metabolic process; P:cellular protein modification process; P:cellular amino acid metabolic process; P:response to stress; P:cell cycle; P:signal transduction; P:cell-cell signaling; F:transcription factor binding; P:cell death; P:catabolic pr…	EC:2.3.1.32; EC:2.3.1.48	Lysine N-acetyltransferase; Histone acetyltransferase	IPR001965 (SMART); G3DSA:3.30.60.60 (GENE3D); IPR013083 (G3DSA:3.30.40.GENE3D); G3DSA:3.40.630.30 (GENE3D); IPR036388 (G3DSA:1.10.10.GENE3D); IPR013083 (G3DSA:3.30.40.GENE3D); IPR002717 (PFAM); mobidb-lite (MOBIDB_LITE); mobidb-lite (MOBIDB_LITE); mobidb-lite (MOBIDB_LITE); mobidb-lite (MOBIDB_LITE); mobidb-lite (MOBIDB_LITE); mobidb-lite (MOBIDB_LITE); mobidb-lite (MOBIDB_LITE); mobidb-lite (MOB…	F:GO:0004402; P:GO:0006355; P:GO:0016573	F:histone acetyltransferase activity; P:regulation of transcription, DNA-templated; P:histone acetylation
TRUE	[INTERPRO, BLASTED, MAPPED, GO-SLIM]	DERPT_G3410	: Full=Histone acetyltransferase GCN5	2316	20	4.39976e-137	62.21	40	P:GO:0000003; P:GO:0000902; F:GO:0000988; P:GO:0002376; F:GO:0003677; F:GO:0003700; C:GO:0005634; C:GO:0005654; C:GO:0005694; C:GO:0005829; C:GO:0005856; P:GO:0005975; P:GO:0005975; P:GO:0006464; P:GO:0006520; P:GO:0006790; P:GO:0006810; P:GO:0006950; P:GO:0007005; P:GO:0007049; P:GO:0007165; F:GO:0008134; P:GO:0008283; P:GO:0009056; P:GO:0009056; P:GO:0009058; P:GO:0009058; P:GO:0009790; F:GO:00…	P:reproduction; P:cell morphogenesis; F:obsolete transcription factor activity, protein binding; P:immune system process; F:DNA binding; F:DNA-binding transcription factor activity; C:nucleus; C:nucleoplasm; C:chromosome; C:cytosol; C:cytoskeleton; P:carbohydrate metabolic process; P:carbohydrate metabolic process; P:cellular protein modification process; P:cellular amino acid metabolic process; …	EC:2.3.1.32; EC:2.3.1.48	Lysine N-acetyltransferase; Histone acetyltransferase	Coil (COILS); Coil (COILS); Coil (COILS); IPR001487 (PRINTS); IPR001487 (SMART); IPR001965 (SMART); IPR018501 (SMART); IPR018501 (PFAM); IPR013083 (G3DSA:3.30.40.GENE3D); IPR001487 (PFAM); IPR013083 (G3DSA:3.30.40.GENE3D); IPR013083 (G3DSA:3.30.40.GENE3D); IPR036427 (G3DSA:1.20.920.GENE3D); IPR019787 (PFAM); mobidb-lite (MOBIDB_LITE); mobidb-lite (MOBIDB_LITE); mobidb-lite (MOBIDB_LITE); mobidb-l…	F:GO:0005515; C:GO:0016589; F:GO:0035064	F:protein binding; C:NURF complex; F:methylated histone binding
TRUE	[INTERPRO, BLASTED, MAPPED, GO-SLIM]	DERPT_G1438	: Full=Histone acetyltransferase ESA1	1418	20	0	69.51	27	C:GO:0000228; F:GO:0000988; P:GO:0002376; F:GO:0003729; C:GO:0005654; C:GO:0005730; C:GO:0005829; P:GO:0006259; P:GO:0006464; P:GO:0006520; P:GO:0006914; P:GO:0006950; P:GO:0007049; P:GO:0007165; P:GO:0007267; F:GO:0008134; P:GO:0008219; P:GO:0009058; F:GO:0016301; F:GO:0016746; F:GO:0019899; P:GO:0030154; C:GO:0032991; F:GO:0042393; F:GO:0043167; P:GO:0048856; P:GO:0051276	C:nuclear chromosome; F:obsolete transcription factor activity, protein binding; P:immune system process; F:mRNA binding; C:nucleoplasm; C:nucleolus; C:cytosol; P:DNA metabolic process; P:cellular protein modification process; P:cellular amino acid metabolic process; P:autophagy; P:response to stress; P:cell cycle; P:signal transduction; P:cell-cell signaling; F:transcription factor binding; P:ce…	EC:2.3.1.32; EC:2.3.1.48	Lysine N-acetyltransferase; Histone acetyltransferase	IPR000719 (SMART); IPR000719 (PFAM); IPR002717 (PFAM); G3DSA:2.30.30.140 (GENE3D); G3DSA:3.40.630.30 (GENE3D); G3DSA:3.30.200.20 (GENE3D); IPR025995 (PFAM); G3DSA:1.10.510.10 (GENE3D); IPR036388 (G3DSA:1.10.10.GENE3D); G3DSA:3.30.60.60 (GENE3D); mobidb-lite (MOBIDB_LITE); mobidb-lite (MOBIDB_LITE); mobidb-lite (MOBIDB_LITE); mobidb-lite (MOBIDB_LITE); mobidb-lite (MOBIDB_LITE); PTHR10615 (PANTHER…	F:GO:0004402; F:GO:0004672; F:GO:0005524; P:GO:0006355; P:GO:0006468; P:GO:0016573; C:GO:0072487	F:histone acetyltransferase activity; F:protein kinase activity; F:ATP binding; P:regulation of transcription, DNA-templated; P:protein phosphorylation; P:histone acetylation; C:MSL complex
TRUE	[INTERPRO, BLASTED, MAPPED, GO-SLIM]	DERPT_G816	: Full=Histone acetyltransferase GCN5	1041	20	4.62259e-99	61.55	44	P:GO:0000003; C:GO:0000228; P:GO:0000278; P:GO:0000902; F:GO:0000988; P:GO:0002376; P:GO:0003013; F:GO:0003677; F:GO:0003723; C:GO:0005654; C:GO:0005730; C:GO:0005829; C:GO:0005856; P:GO:0005975; P:GO:0005975; P:GO:0006259; P:GO:0006464; P:GO:0006520; P:GO:0006790; P:GO:0006810; P:GO:0006950; P:GO:0007005; P:GO:0007165; P:GO:0007267; F:GO:0008134; P:GO:0008283; P:GO:0009056; P:GO:0009056; P:GO:00…	P:reproduction; C:nuclear chromosome; P:mitotic cell cycle; P:cell morphogenesis; F:obsolete transcription factor activity, protein binding; P:immune system process; P:circulatory system process; F:DNA binding; F:RNA binding; C:nucleoplasm; C:nucleolus; C:cytosol; C:cytoskeleton; P:carbohydrate metabolic process; P:carbohydrate metabolic process; P:DNA metabolic process; P:cellular protein modifi…	EC:2.3.1.32; EC:3.6.1.3; EC:2.3.1.48; EC:3.6.1.15	Lysine N-acetyltransferase; Adenosinetriphosphatase; Histone acetyltransferase; Nucleoside-triphosphate phosphatase	IPR001487 (PRINTS); IPR001487 (SMART); G3DSA:3.40.630.30 (GENE3D); IPR001487 (PFAM); IPR000182 (PFAM); IPR009464 (PFAM); IPR036427 (G3DSA:1.20.920.GENE3D); mobidb-lite (MOBIDB_LITE); IPR037800 (PTHR22880:PANTHER); PTHR22880 (PANTHER); IPR037800 (PTHR22880:PANTHER); PTHR22880 (PANTHER); IPR018359 (PROSITE_PATTERNS); IPR001487 (PROSITE_PROFILES); IPR000182 (PROSITE_PROFILES); cd04301 (CDD); IPR0364…	F:GO:0004402; F:GO:0005515; C:GO:0005634; P:GO:0006355	F:histone acetyltransferase activity; F:protein binding; C:nucleus; P:regulation of transcription, DNA-templated
TRUE	[INTERPRO, BLASTED, MAPPED, GO-SLIM]	DERPT_G8648	: Full=5-aminolevulinate erythroid- mitochondrial Short=ALAS-E ame: Full=5-aminolevulinic acid synthase 2 ame: Full=Delta-ALA synthase 2 ame: Full=Delta-aminolevulinate synthase 2 Flags: Precursor	1649	20	6.50696e-174	68.84	15	P:GO:0002376; F:GO:0003924; C:GO:0005739; P:GO:0006520; P:GO:0006950; P:GO:0007165; P:GO:0009058; P:GO:0009058; P:GO:0009790; F:GO:0016746; P:GO:0030154; P:GO:0034641; P:GO:0042592; F:GO:0043167; P:GO:0051186	P:immune system process; F:GTPase activity; C:mitochondrion; P:cellular amino acid metabolic process; P:response to stress; P:signal transduction; P:biosynthetic process; P:biosynthetic process; P:embryo development; F:transferase activity, transferring acyl groups; P:cell differentiation; P:cellular nitrogen compound metabolic process; P:homeostatic process; F:ion binding; P:cofactor metabolic p…	EC:2.3.1.37; EC:3.6.1.15	5-aminolevulinate synthase; Nucleoside-triphosphate phosphatase	Coil (COILS); Coil (COILS); Coil (COILS); Coil (COILS); Coil (COILS); PR00449 (PRINTS); SM00175 (SMART); SM00173 (SMART); SM00174 (SMART); SM00176 (SMART); IPR024646 (PFAM); IPR015421 (G3DSA:3.40.640.GENE3D); IPR001806 (PFAM); G3DSA:3.40.50.300 (GENE3D); IPR005225 (TIGRFAM); IPR015422 (G3DSA:3.90.1150.GENE3D); IPR010961 (TIGRFAM); IPR004839 (PFAM); mobidb-lite (MOBIDB_LITE); mobidb-lite (MOBIDB_L…	F:GO:0003824; F:GO:0003870; F:GO:0003924; F:GO:0005525; P:GO:0007165; P:GO:0009058; C:GO:0016020; F:GO:0030170; P:GO:0032486; P:GO:0033014	F:catalytic activity; F:5-aminolevulinate synthase activity; F:GTPase activity; F:GTP binding; P:signal transduction; P:biosynthetic process; C:membrane; F:pyridoxal phosphate binding; P:Rap protein signal transduction; P:tetrapyrrole biosynthetic process
TRUE	[INTERPRO, BLASTED, MAPPED, GO-SLIM]	DERPT_G9721	: Full=DDB1- and CUL4-associated factor 8 ame: Full=WD repeat-containing 42A	985	20	1.95192e-100	44.81	8	C:GO:0005634; C:GO:0005654; C:GO:0005739; P:GO:0006464; P:GO:0009058; F:GO:0016746; C:GO:0032991; P:GO:0051276	C:nucleus; C:nucleoplasm; C:mitochondrion; P:cellular protein modification process; P:biosynthetic process; F:transferase activity, transferring acyl groups; C:protein-containing complex; P:chromosome organization	EC:2.3.1.48	Histone acetyltransferase	Coil (COILS); IPR001680 (SMART); IPR001680 (PFAM); IPR015943 (G3DSA:2.130.10.GENE3D); IPR015943 (G3DSA:2.130.10.GENE3D); IPR015943 (G3DSA:2.130.10.GENE3D); mobidb-lite (MOBIDB_LITE); mobidb-lite (MOBIDB_LITE); mobidb-lite (MOBIDB_LITE); PTHR15574 (PANTHER); PTHR15574:SF43 (PANTHER); IPR017986 (PROSITE_PROFILES); IPR017986 (PROSITE_PROFILES); IPR001680 (PROSITE_PROFILES); IPR001680 (PROSITE_PROFIL…	F:GO:0005515	F:protein binding
TRUE	[INTERPRO, BLASTED, MAPPED, GO-SLIM]	DERPT_G6338	: Full=TATA-box-binding ame: Full=TATA sequence-binding ame: Full=TATA-binding factor ame: Full=TATA-box factor ame: Full=Transcription initiation factor TFIID TBP subunit	772	20	5.8122e-106	76.09	21	C:GO:0000228; F:GO:0000988; F:GO:0003677; F:GO:0003700; F:GO:0003700; F:GO:0003723; C:GO:0005654; C:GO:0005730; C:GO:0005737; P:GO:0006259; P:GO:0006464; F:GO:0008134; P:GO:0009058; P:GO:0009790; F:GO:0016746; F:GO:0019899; P:GO:0032196; C:GO:0032991; P:GO:0034655; P:GO:0051276; P:GO:0065003	C:nuclear chromosome; F:obsolete transcription factor activity, protein binding; F:DNA binding; F:DNA-binding transcription factor activity; F:DNA-binding transcription factor activity; F:RNA binding; C:nucleoplasm; C:nucleolus; C:cytoplasm; P:DNA metabolic process; P:cellular protein modification process; F:transcription factor binding; P:biosynthetic process; P:embryo development; F:transferase…	EC:2.3.1.48	Histone acetyltransferase	IPR000814 (PRINTS); G3DSA:2.60.200.20 (GENE3D); IPR025999 (PFAM); IPR012295 (G3DSA:3.30.310.GENE3D); IPR012295 (G3DSA:3.30.310.GENE3D); IPR000814 (PFAM); IPR037912 (PANTHER); PTHR13233:SF0 (PANTHER); IPR000253 (PROSITE_PROFILES); IPR033710 (CDD); IPR000253 (CDD); SSF55945 (SUPERFAMILY); IPR008984 (SUPERFAMILY); SSF55945 (SUPERFAMILY)	F:GO:0002151; F:GO:0003677; F:GO:0005515; P:GO:0006352; C:GO:0031011; C:GO:0071339	F:G-quadruplex RNA binding; F:DNA binding; F:protein binding; P:DNA-templated transcription, initiation; C:Ino80 complex; C:MLL1 complex
TRUE	[INTERPRO, BLASTED, MAPPED, GO-SLIM]	DERPT_G4225	: Full=Histone acetyltransferase type B catalytic subunit	523	20	1.09063e-89	47.65	8	C:GO:0005634; C:GO:0005654; P:GO:0006464; P:GO:0006950; P:GO:0009058; F:GO:0016746; P:GO:0034641; P:GO:0051276	C:nucleus; C:nucleoplasm; P:cellular protein modification process; P:response to stress; P:biosynthetic process; F:transferase activity, transferring acyl groups; P:cellular nitrogen compound metabolic process; P:chromosome organization	EC:2.3.1.48	Histone acetyltransferase	Coil (COILS); IPR037113 (G3DSA:3.90.360.GENE3D); IPR019467 (PFAM); IPR013523 (G3DSA:1.10.10.GENE3D); G3DSA:3.40.630.30 (GENE3D); IPR017380 (PANTHER); IPR016181 (SUPERFAMILY)	F:GO:0004402; C:GO:0005634; P:GO:0006325; P:GO:0006348; P:GO:0016573; F:GO:0042393	F:histone acetyltransferase activity; C:nucleus; P:chromatin organization; P:chromatin silencing at telomere; P:histone acetylation; F:histone binding
TRUE	[INTERPRO, BLASTED, MAPPED, GO-SLIM]	DERPT_G345	: Full=WD40 repeat-containing SMU1 ame: Full=Smu-1 suppressor of mec-8 and unc-52 homolog	515	20	0	63.9	12	P:GO:0000278; C:GO:0005634; C:GO:0005654; C:GO:0005737; P:GO:0006464; P:GO:0009058; F:GO:0016746; P:GO:0030154; C:GO:0032991; P:GO:0034641; P:GO:0048856; P:GO:0051276	P:mitotic cell cycle; C:nucleus; C:nucleoplasm; C:cytoplasm; P:cellular protein modification process; P:biosynthetic process; F:transferase activity, transferring acyl groups; P:cell differentiation; C:protein-containing complex; P:cellular nitrogen compound metabolic process; P:anatomical structure development; P:chromosome organization	EC:2.3.1.48	Histone acetyltransferase	IPR020472 (PRINTS); IPR006595 (SMART); IPR006594 (SMART); IPR001680 (SMART); IPR024977 (PFAM); IPR015943 (G3DSA:2.130.10.GENE3D); IPR001680 (PFAM); PTHR22848 (PANTHER); PTHR22848:SF0 (PANTHER); IPR019775 (PROSITE_PATTERNS); IPR019775 (PROSITE_PATTERNS); IPR001680 (PROSITE_PROFILES); IPR001680 (PROSITE_PROFILES); IPR001680 (PROSITE_PROFILES); IPR001680 (PROSITE_PROFILES); IPR017986 (PROSITE_PROFIL…	F:GO:0005515	F:protein binding
TRUE	[INTERPRO, BLASTED, MAPPED, GO-SLIM]	DERPT_G1709	: Full=WD repeat-containing 26	1113	20	0	55.22	9	C:GO:0005634; C:GO:0005654; C:GO:0005737; P:GO:0006464; P:GO:0009058; F:GO:0016746; C:GO:0032991; P:GO:0048856; P:GO:0051276	C:nucleus; C:nucleoplasm; C:cytoplasm; P:cellular protein modification process; P:biosynthetic process; F:transferase activity, transferring acyl groups; C:protein-containing complex; P:anatomical structure development; P:chromosome organization	EC:2.3.1.48	Histone acetyltransferase	IPR001680 (SMART); IPR001680 (PFAM); IPR015943 (G3DSA:2.130.10.GENE3D); mobidb-lite (MOBIDB_LITE); mobidb-lite (MOBIDB_LITE); mobidb-lite (MOBIDB_LITE); mobidb-lite (MOBIDB_LITE); mobidb-lite (MOBIDB_LITE); mobidb-lite (MOBIDB_LITE); PTHR22838:SF0 (PANTHER); PTHR22838 (PANTHER); IPR006595 (PROSITE_PROFILES); IPR017986 (PROSITE_PROFILES); IPR001680 (PROSITE_PROFILES); IPR001680 (PROSITE_PROFILES);…	F:GO:0005515	F:protein binding
TRUE	[INTERPRO, BLASTED, MAPPED, GO-SLIM]	DERPT_G11683	: Full=Autophagy-related 16-1 ame: Full=APG16-like 1	560	20	4.19655e-88	48.66	16	P:GO:0000003; C:GO:0005634; C:GO:0005654; C:GO:0005737; P:GO:0006464; P:GO:0006914; P:GO:0006950; P:GO:0009058; F:GO:0016746; P:GO:0022607; P:GO:0030154; C:GO:0032991; P:GO:0034641; P:GO:0044403; P:GO:0048856; P:GO:0051276	P:reproduction; C:nucleus; C:nucleoplasm; C:cytoplasm; P:cellular protein modification process; P:autophagy; P:response to stress; P:biosynthetic process; F:transferase activity, transferring acyl groups; P:cellular component assembly; P:cell differentiation; C:protein-containing complex; P:cellular nitrogen compound metabolic process; P:symbiont process; P:anatomical structure development; P:chr…	EC:2.3.1.48	Histone acetyltransferase	Coil (COILS); Coil (COILS); Coil (COILS); Coil (COILS); Coil (COILS); IPR020472 (PRINTS); IPR001680 (SMART); IPR015943 (G3DSA:2.130.10.GENE3D); IPR015943 (G3DSA:2.130.10.GENE3D); IPR013923 (PFAM); IPR001680 (PFAM); mobidb-lite (MOBIDB_LITE); PTHR19878 (PANTHER); PTHR19878:SF8 (PANTHER); IPR019775 (PROSITE_PATTERNS); IPR019775 (PROSITE_PATTERNS); IPR001680 (PROSITE_PROFILES); IPR001680 (PROSITE_PR…	F:GO:0005515	F:protein binding
TRUE	[INTERPRO, BLASTED, MAPPED, GO-SLIM]	DERPT_G3616	: Full=Ubiquitin thioesterase OTU1	467	20	3.86062e-74	62.4	23	F:GO:0000988; F:GO:0003677; F:GO:0003700; F:GO:0003729; C:GO:0005576; C:GO:0005654; C:GO:0005730; C:GO:0005737; P:GO:0006464; P:GO:0006629; P:GO:0006950; P:GO:0007165; F:GO:0008168; F:GO:0008233; P:GO:0009056; P:GO:0009056; P:GO:0009058; F:GO:0016746; F:GO:0019899; P:GO:0030154; C:GO:0032991; P:GO:0034641; P:GO:0048856	F:obsolete transcription factor activity, protein binding; F:DNA binding; F:DNA-binding transcription factor activity; F:mRNA binding; C:extracellular region; C:nucleoplasm; C:nucleolus; C:cytoplasm; P:cellular protein modification process; P:lipid metabolic process; P:response to stress; P:signal transduction; F:methyltransferase activity; F:peptidase activity; P:catabolic process; P:catabolic p…	EC:2.3.1.48; EC:3.4.19.12	Histone acetyltransferase; Ubiquitinyl hydrolase 1	IPR001387 (SMART); G3DSA:3.90.70.80 (GENE3D); IPR001387 (PFAM); IPR013729 (PFAM); G3DSA:3.10.20.90 (GENE3D); G3DSA:1.10.260.40 (GENE3D); PTHR13312:SF0 (PANTHER); PTHR13312 (PANTHER); PTHR13312 (PANTHER); PTHR13312:SF0 (PANTHER); IPR001387 (PROSITE_PROFILES); IPR003323 (PROSITE_PROFILES); IPR001387 (CDD); IPR010982 (SUPERFAMILY); IPR038765 (SUPERFAMILY); IPR029071 (SUPERFAMILY)	F:GO:0003677; F:GO:0043565	F:DNA binding; F:sequence-specific DNA binding
TRUE	[INTERPRO, BLASTED, MAPPED, GO-SLIM]	DERPT_G11672	: Full=Serine palmitoyltransferase 2 ame: Full=Long chain base biosynthesis 2 Short=LCB 2 ame: Full=Long chain base biosynthesis 2a Short=LCB2a ame: Full=Serine-palmitoyl- transferase 2 Short=SPT 2	775	20	0	64.93	13	C:GO:0005739; C:GO:0005773; C:GO:0005783; P:GO:0006629; P:GO:0006914; P:GO:0008219; P:GO:0009058; P:GO:0009058; F:GO:0016746; P:GO:0034641; F:GO:0043167; P:GO:0044281; P:GO:0048856	C:mitochondrion; C:vacuole; C:endoplasmic reticulum; P:lipid metabolic process; P:autophagy; P:cell death; P:biosynthetic process; P:biosynthetic process; F:transferase activity, transferring acyl groups; P:cellular nitrogen compound metabolic process; F:ion binding; P:small molecule metabolic process; P:anatomical structure development	EC:2.3.1.50	Serine C-palmitoyltransferase	IPR015421 (G3DSA:3.40.640.GENE3D); IPR015422 (G3DSA:3.90.1150.GENE3D); IPR004839 (PFAM); PTHR13693:SF56 (PANTHER); PTHR13693 (PANTHER); IPR001917 (PROSITE_PATTERNS); TRANSMEMBRANE (PHOBIUS); NON_CYTOPLASMIC_DOMAIN (PHOBIUS); NON_CYTOPLASMIC_DOMAIN (PHOBIUS); CYTOPLASMIC_DOMAIN (PHOBIUS); TRANSMEMBRANE (PHOBIUS); cd06454 (CDD); IPR015424 (SUPERFAMILY); TMhelix (TMHMM)	F:GO:0003824; P:GO:0008152; P:GO:0009058; F:GO:0016740; F:GO:0030170	F:catalytic activity; P:metabolic process; P:biosynthetic process; F:transferase activity; F:pyridoxal phosphate binding
TRUE	[INTERPRO, BLASTED, MAPPED, GO-SLIM]	DERPT_G550	: Full=Glycerol-3-phosphate acyltransferase 3 Short=GPAT-3 ame: Full=1-acyl-sn-glycerol-3-phosphate O-acyltransferase 9 Short=1-AGP acyltransferase 9 Short=1-AGPAT 9 ame: Full=Lysophosphatidic acid acyltransferase theta Short=LPAAT-theta	1659	20	2.72945e-129	61.68	15	C:GO:0005783; P:GO:0006629; P:GO:0006790; P:GO:0006810; P:GO:0006810; P:GO:0007165; P:GO:0009058; P:GO:0009058; F:GO:0016746; P:GO:0021700; P:GO:0030154; P:GO:0040007; P:GO:0044281; P:GO:0048856; P:GO:0051186	C:endoplasmic reticulum; P:lipid metabolic process; P:sulfur compound metabolic process; P:transport; P:transport; P:signal transduction; P:biosynthetic process; P:biosynthetic process; F:transferase activity, transferring acyl groups; P:developmental maturation; P:cell differentiation; P:growth; P:small molecule metabolic process; P:anatomical structure development; P:cofactor metabolic process	EC:2.3.1.51; EC:2.3.1.15	1-acylglycerol-3-phosphate O-acyltransferase; Glycerol-3-phosphate 1-O-acyltransferase	IPR002123 (SMART); IPR002123 (PFAM); IPR000073 (PFAM); IPR029058 (G3DSA:3.40.50.GENE3D); IPR006693 (PFAM); PTHR11005 (PANTHER); PTHR11005:SF78 (PANTHER); PTHR11005 (PANTHER); PTHR11005:SF78 (PANTHER); CYTOPLASMIC_DOMAIN (PHOBIUS); TRANSMEMBRANE (PHOBIUS); TRANSMEMBRANE (PHOBIUS); CYTOPLASMIC_DOMAIN (PHOBIUS); TRANSMEMBRANE (PHOBIUS); TRANSMEMBRANE (PHOBIUS); NON_CYTOPLASMIC_DOMAIN (PHOBIUS); NON_…	P:GO:0006629; P:GO:0008152; F:GO:0016746	P:lipid metabolic process; P:metabolic process; F:transferase activity, transferring acyl groups
TRUE	[INTERPRO, BLASTED, MAPPED, GO-SLIM]	DERPT_G10195	: Full=Glycerol-3-phosphate acyltransferase 3 Short=GPAT-3 ame: Full=1-acyl-sn-glycerol-3-phosphate O-acyltransferase 9 Short=1-AGP acyltransferase 9 Short=1-AGPAT 9 ame: Full=Lysophosphatidic acid acyltransferase theta Short=LPAAT-theta	552	20	2.38497e-135	56.97	13	C:GO:0005783; P:GO:0006629; P:GO:0006810; P:GO:0006810; P:GO:0007165; P:GO:0009058; P:GO:0009058; F:GO:0016746; P:GO:0021700; P:GO:0030154; P:GO:0040007; P:GO:0044281; P:GO:0048856	C:endoplasmic reticulum; P:lipid metabolic process; P:transport; P:transport; P:signal transduction; P:biosynthetic process; P:biosynthetic process; F:transferase activity, transferring acyl groups; P:developmental maturation; P:cell differentiation; P:growth; P:small molecule metabolic process; P:anatomical structure development	EC:2.3.1.51; EC:2.3.1.15	1-acylglycerol-3-phosphate O-acyltransferase; Glycerol-3-phosphate 1-O-acyltransferase	Coil (COILS); IPR002123 (SMART); IPR002123 (PFAM); mobidb-lite (MOBIDB_LITE); mobidb-lite (MOBIDB_LITE); mobidb-lite (MOBIDB_LITE); PTHR23063 (PANTHER); PTHR23063:SF2 (PANTHER); NON_CYTOPLASMIC_DOMAIN (PHOBIUS); TRANSMEMBRANE (PHOBIUS); TRANSMEMBRANE (PHOBIUS); CYTOPLASMIC_DOMAIN (PHOBIUS); NON_CYTOPLASMIC_DOMAIN (PHOBIUS); TRANSMEMBRANE (PHOBIUS); CYTOPLASMIC_DOMAIN (PHOBIUS); TRANSMEMBRANE (PHO…	P:GO:0008152; F:GO:0016746	P:metabolic process; F:transferase activity, transferring acyl groups
TRUE	[INTERPRO, BLASTED, MAPPED, GO-SLIM]	DERPT_G7682	: Full=Dihydrolipoyllysine-residue succinyltransferase component of 2-oxoglutarate dehydrogenase complex ame: Full=2-oxoglutarate dehydrogenase complex component E2 Short=OGDC-E2 ame: Full=Dihydrolipoamide succinyltransferase component of 2-oxoglutarate dehydrogenase complex	1575	20	2.02375e-159	66.77	19	C:GO:0005576; C:GO:0005634; C:GO:0005739; C:GO:0005794; C:GO:0005829; C:GO:0005840; C:GO:0005886; P:GO:0006091; P:GO:0006520; P:GO:0006950; P:GO:0007005; F:GO:0008135; P:GO:0009056; P:GO:0009056; P:GO:0016192; F:GO:0016746; C:GO:0032991; F:GO:0043167; P:GO:0051186	C:extracellular region; C:nucleus; C:mitochondrion; C:Golgi apparatus; C:cytosol; C:ribosome; C:plasma membrane; P:generation of precursor metabolites and energy; P:cellular amino acid metabolic process; P:response to stress; P:mitochondrion organization; F:translation factor activity, RNA binding; P:catabolic process; P:catabolic process; P:vesicle-mediated transport; F:transferase activity, tra…	EC:2.3.1.61	Dihydrolipoyllysine-residue succinyltransferase	Coil (COILS); IPR003890 (SMART); IPR016021 (G3DSA:1.25.40.GENE3D); IPR023213 (G3DSA:3.30.559.GENE3D); G3DSA:3.30.450.70 (GENE3D); IPR016021 (G3DSA:1.25.40.GENE3D); IPR000089 (PFAM); IPR006722 (PFAM); IPR006255 (TIGRFAM); IPR003307 (PFAM); G3DSA:2.40.50.100 (GENE3D); IPR016021 (G3DSA:1.25.40.GENE3D); IPR001078 (PFAM); IPR003890 (PFAM); mobidb-lite (MOBIDB_LITE); mobidb-lite (MOBIDB_LITE); mobidb-l…	F:GO:0003723; F:GO:0004149; F:GO:0005488; F:GO:0005515; C:GO:0005622; P:GO:0006099; P:GO:0006888; P:GO:0008152; F:GO:0016746; C:GO:0045252	F:RNA binding; F:dihydrolipoyllysine-residue succinyltransferase activity; F:binding; F:protein binding; C:intracellular; P:tricarboxylic acid cycle; P:ER to Golgi vesicle-mediated transport; P:metabolic process; F:transferase activity, transferring acyl groups; C:oxoglutarate dehydrogenase complex
TRUE	[INTERPRO, BLASTED, MAPPED, GO-SLIM]	DERPT_G736	: Full=Fatty acid synthase Includes: ame: Full=[Acyl-carrier- ] S-acetyltransferase Includes: ame: Full=[Acyl-carrier- ] S-malonyltransferase Includes: ame: Full=3-oxoacyl-[acyl-carrier- ] synthase Includes: ame: Full=3-oxoacyl-[acyl-carrier- ] reductase Includes: ame: Full=3-hydroxyacyl-[acyl-carrier- ] dehydratase Includes: ame: Full=Enoyl-[acyl-carrier- ] reductase Includes: ame: Full=Oleoyl-	2620	20	0	49.47	12	P:GO:0002376; C:GO:0005739; C:GO:0005829; P:GO:0006629; P:GO:0009058; P:GO:0009058; F:GO:0016491; F:GO:0016746; P:GO:0030154; C:GO:0032991; P:GO:0044281; P:GO:0048856	P:immune system process; C:mitochondrion; C:cytosol; P:lipid metabolic process; P:biosynthetic process; P:biosynthetic process; F:oxidoreductase activity; F:transferase activity, transferring acyl groups; P:cell differentiation; C:protein-containing complex; P:small molecule metabolic process; P:anatomical structure development	EC:2.3.1.85	Fatty-acid synthase	SM00822 (SMART); IPR020843 (SMART); IPR020801 (SMART); IPR020841 (SMART); IPR014031 (PFAM); IPR001227 (G3DSA:3.40.366.GENE3D); G3DSA:3.10.129.110 (GENE3D); G3DSA:3.30.70.3290 (GENE3D); G3DSA:3.90.180.10 (GENE3D); IPR016039 (G3DSA:3.40.47.GENE3D); IPR036736 (G3DSA:1.10.1200.GENE3D); IPR009081 (PFAM); IPR020807 (PFAM); IPR013968 (PFAM); IPR014030 (PFAM); IPR032821 (PFAM); G3DSA:3.40.50.720 (GENE3D)…	F:GO:0003824; P:GO:0008152; F:GO:0016491; F:GO:0016740; P:GO:0055114	F:catalytic activity; P:metabolic process; F:oxidoreductase activity; F:transferase activity; P:oxidation-reduction process
TRUE	[INTERPRO, BLASTED, MAPPED, GO-SLIM]	DERPT_G4356	: Full=Elongation of very long chain fatty acids 5 ame: Full=3-keto acyl- synthase ELOVL5 ame: Full=ELOVL fatty acid elongase 5 Short=ELOVL FA elongase 5 ame: Full=Very long chain 3-ketoacyl- synthase 5 ame: Full=Very long chain 3-oxoacyl- synthase 5	267	20	1.7504e-43	53.24	6	C:GO:0005783; P:GO:0006629; P:GO:0009058; P:GO:0009058; F:GO:0016746; P:GO:0044281	C:endoplasmic reticulum; P:lipid metabolic process; P:biosynthetic process; P:biosynthetic process; F:transferase activity, transferring acyl groups; P:small molecule metabolic process	EC:2.3.1.85	Fatty-acid synthase	IPR002076 (PFAM); IPR002076 (PANTHER); PTHR11157:SF47 (PANTHER); CYTOPLASMIC_DOMAIN (PHOBIUS); TRANSMEMBRANE (PHOBIUS); TRANSMEMBRANE (PHOBIUS); CYTOPLASMIC_DOMAIN (PHOBIUS); NON_CYTOPLASMIC_DOMAIN (PHOBIUS); TRANSMEMBRANE (PHOBIUS); CYTOPLASMIC_DOMAIN (PHOBIUS); TRANSMEMBRANE (PHOBIUS); NON_CYTOPLASMIC_DOMAIN (PHOBIUS); CYTOPLASMIC_DOMAIN (PHOBIUS); NON_CYTOPLASMIC_DOMAIN (PHOBIUS); TRANSMEMBRAN…	C:GO:0016021	C:integral component of membrane
TRUE	[INTERPRO, BLASTED, MAPPED, GO-SLIM]	DERPT_G3589	: Full=Elongation of very long chain fatty acids 5 ame: Full=3-keto acyl- synthase Elovl5 ame: Full=ELOVL fatty acid elongase 5 Short=ELOVL FA elongase 5 ame: Full=Very long chain 3-ketoacyl- synthase 5 ame: Full=Very long chain 3-oxoacyl- synthase 5	348	20	9.21392e-63	52.41	6	C:GO:0005783; P:GO:0006629; P:GO:0009058; P:GO:0009058; F:GO:0016746; P:GO:0044281	C:endoplasmic reticulum; P:lipid metabolic process; P:biosynthetic process; P:biosynthetic process; F:transferase activity, transferring acyl groups; P:small molecule metabolic process	EC:2.3.1.85	Fatty-acid synthase	IPR002076 (PFAM); IPR002076 (PANTHER); PTHR11157:SF17 (PANTHER); CYTOPLASMIC_DOMAIN (PHOBIUS); NON_CYTOPLASMIC_DOMAIN (PHOBIUS); CYTOPLASMIC_DOMAIN (PHOBIUS); TRANSMEMBRANE (PHOBIUS); TRANSMEMBRANE (PHOBIUS); NON_CYTOPLASMIC_DOMAIN (PHOBIUS); TRANSMEMBRANE (PHOBIUS); TRANSMEMBRANE (PHOBIUS); NON_CYTOPLASMIC_DOMAIN (PHOBIUS); TRANSMEMBRANE (PHOBIUS); TRANSMEMBRANE (PHOBIUS); TRANSMEMBRANE (PHOBIUS…	C:GO:0016021	C:integral component of membrane
TRUE	[INTERPRO, BLASTED, MAPPED, GO-SLIM]	DERPT_G11394	: Full=Inhibitor of growth 4 ame: Full=p29ING4	627	20	5.68248e-58	56.19	11	C:GO:0005654; C:GO:0005783; P:GO:0006464; P:GO:0006629; P:GO:0008219; P:GO:0009058; P:GO:0009058; F:GO:0016746; P:GO:0034641; P:GO:0044281; P:GO:0051276	C:nucleoplasm; C:endoplasmic reticulum; P:cellular protein modification process; P:lipid metabolic process; P:cell death; P:biosynthetic process; P:biosynthetic process; F:transferase activity, transferring acyl groups; P:cellular nitrogen compound metabolic process; P:small molecule metabolic process; P:chromosome organization	EC:2.3.1.85	Fatty-acid synthase	Coil (COILS); IPR001965 (SMART); IPR024610 (SMART); IPR002076 (PFAM); IPR024610 (PFAM); IPR013083 (G3DSA:3.30.40.GENE3D); mobidb-lite (MOBIDB_LITE); mobidb-lite (MOBIDB_LITE); IPR002076 (PANTHER); PTHR11157:SF17 (PANTHER); TRANSMEMBRANE (PHOBIUS); TRANSMEMBRANE (PHOBIUS); TRANSMEMBRANE (PHOBIUS); TRANSMEMBRANE (PHOBIUS); TRANSMEMBRANE (PHOBIUS); CYTOPLASMIC_DOMAIN (PHOBIUS); TRANSMEMBRANE (PHOBIU…	C:GO:0016021	C:integral component of membrane
TRUE	[INTERPRO, BLASTED, MAPPED, GO-SLIM]	DERPT_G11216	: Full=Fatty acid synthase Includes: ame: Full=[Acyl-carrier- ] S-acetyltransferase Includes: ame: Full=[Acyl-carrier- ] S-malonyltransferase Includes: ame: Full=3-oxoacyl-[acyl-carrier- ] synthase Includes: ame: Full=3-oxoacyl-[acyl-carrier- ] reductase Includes: ame: Full=3-hydroxyacyl-[acyl-carrier- ] dehydratase Includes: ame: Full=Enoyl-[acyl-carrier- ] reductase Includes: ame: Full=Oleoyl-	3184	20	0	49.29	13	P:GO:0002376; C:GO:0005739; C:GO:0005829; P:GO:0006629; P:GO:0009058; P:GO:0009058; F:GO:0016491; F:GO:0016746; P:GO:0030154; C:GO:0032991; F:GO:0043167; P:GO:0044281; P:GO:0048856	P:immune system process; C:mitochondrion; C:cytosol; P:lipid metabolic process; P:biosynthetic process; P:biosynthetic process; F:oxidoreductase activity; F:transferase activity, transferring acyl groups; P:cell differentiation; C:protein-containing complex; F:ion binding; P:small molecule metabolic process; P:anatomical structure development	EC:2.3.1.85	Fatty-acid synthase	IPR002347 (PRINTS); IPR002347 (PRINTS); IPR020843 (SMART); IPR020841 (SMART); SM00822 (SMART); IPR020801 (SMART); IPR007867 (PFAM); IPR001227 (G3DSA:3.40.366.GENE3D); G3DSA:3.40.50.720 (GENE3D); G3DSA:3.90.180.10 (GENE3D); G3DSA:3.30.70.3290 (GENE3D); PF13561 (PFAM); IPR036188 (G3DSA:3.50.50.GENE3D); G3DSA:3.40.50.150 (GENE3D); G3DSA:3.10.129.110 (GENE3D); IPR020807 (PFAM); G3DSA:3.30.560.10 (GEN…	F:GO:0003824; P:GO:0008152; F:GO:0016491; F:GO:0016614; F:GO:0016740; F:GO:0050660; P:GO:0055114	F:catalytic activity; P:metabolic process; F:oxidoreductase activity; F:oxidoreductase activity, acting on CH-OH group of donors; F:transferase activity; F:flavin adenine dinucleotide binding; P:oxidation-reduction process
TRUE	[INTERPRO, BLASTED, MAPPED, GO-SLIM]	DERPT_G11364	: Full=3-oxoacyl-[acyl-carrier- ] synthase 2 ame: Full=3-oxoacyl-	449	20	1.19671e-137	59.89	12	P:GO:0000003; C:GO:0005739; C:GO:0005829; P:GO:0006629; P:GO:0006950; P:GO:0009058; P:GO:0009058; C:GO:0009536; P:GO:0009790; F:GO:0016746; C:GO:0032991; P:GO:0044281	P:reproduction; C:mitochondrion; C:cytosol; P:lipid metabolic process; P:response to stress; P:biosynthetic process; P:biosynthetic process; C:plastid; P:embryo development; F:transferase activity, transferring acyl groups; C:protein-containing complex; P:small molecule metabolic process	EC:2.3.1.85; EC:2.3.1.41	Fatty-acid synthase; Beta-ketoacyl-[acyl-carrier-protein] synthase I	IPR020841 (SMART); IPR016039 (G3DSA:3.40.47.GENE3D); IPR016039 (G3DSA:3.40.47.GENE3D); IPR014031 (PFAM); IPR017568 (PIRSF); IPR014030 (PFAM); PTHR11712:SF299 (PANTHER); PTHR11712 (PANTHER); IPR018201 (PROSITE_PATTERNS); cd00834 (CDD); IPR016039 (SUPERFAMILY); IPR016039 (SUPERFAMILY)	F:GO:0003824; P:GO:0006633; P:GO:0008152; F:GO:0016747	F:catalytic activity; P:fatty acid biosynthetic process; P:metabolic process; F:transferase activity, transferring acyl groups other than amino-acyl groups
TRUE	[INTERPRO, BLASTED, MAPPED, GO-SLIM]	DERPT_G4775	: Full=Phthiocerol synthesis polyketide synthase type I ame: Full=Beta-ketoacyl-acyl-carrier- synthase I	9958	20	1.5837e-114	53.69	14	C:GO:0005618; C:GO:0005829; C:GO:0005886; P:GO:0006629; P:GO:0006810; P:GO:0009058; P:GO:0009058; F:GO:0016491; F:GO:0016746; P:GO:0022607; C:GO:0032991; F:GO:0043167; P:GO:0044281; P:GO:0071554	C:cell wall; C:cytosol; C:plasma membrane; P:lipid metabolic process; P:transport; P:biosynthetic process; P:biosynthetic process; F:oxidoreductase activity; F:transferase activity, transferring acyl groups; P:cellular component assembly; C:protein-containing complex; F:ion binding; P:small molecule metabolic process; P:cell wall organization or biogenesis	EC:2.3.1.85; EC:2.3.1.41; EC:1.1.1.100	Fatty-acid synthase; Beta-ketoacyl-[acyl-carrier-protein] synthase I; 3-oxoacyl-[acyl-carrier-protein] reductase	Coil (COILS); SM01294 (SMART); IPR020843 (SMART); IPR020841 (SMART); SM00822 (SMART); IPR020806 (SMART); IPR020801 (SMART); IPR013120 (PFAM); G3DSA:3.40.50.720 (GENE3D); PF13469 (PFAM); G3DSA:3.10.129.110 (GENE3D); G3DSA:3.40.50.300 (GENE3D); IPR013149 (PFAM); IPR013968 (PFAM); G3DSA:3.40.50.720 (GENE3D); IPR014043 (PFAM); IPR014031 (PFAM); IPR009081 (PFAM); IPR016039 (G3DSA:3.40.47.GENE3D); G3DS…	F:GO:0003824; P:GO:0008152; F:GO:0016491; F:GO:0016740; F:GO:0031177; P:GO:0055114	F:catalytic activity; P:metabolic process; F:oxidoreductase activity; F:transferase activity; F:phosphopantetheine binding; P:oxidation-reduction process
TRUE	[INTERPRO, BLASTED, MAPPED, GO-SLIM]	DERPT_G8000	: Full=Fatty acid synthase Includes: ame: Full=[Acyl-carrier- ] S-acetyltransferase Includes: ame: Full=[Acyl-carrier- ] S-malonyltransferase Includes: ame: Full=3-oxoacyl-[acyl-carrier- ] synthase Includes: ame: Full=3-oxoacyl-[acyl-carrier- ] reductase Includes: ame: Full=3-hydroxyacyl-[acyl-carrier- ] dehydratase Includes: ame: Full=Enoyl-[acyl-carrier- ] reductase Includes: ame: Full=Oleoyl-	2702	20	0	50.2	16	P:GO:0002376; C:GO:0005739; C:GO:0005829; P:GO:0006629; P:GO:0006790; P:GO:0009058; P:GO:0009058; F:GO:0016491; F:GO:0016746; F:GO:0016829; P:GO:0030154; C:GO:0032991; F:GO:0043167; P:GO:0044281; P:GO:0048856; P:GO:0051186	P:immune system process; C:mitochondrion; C:cytosol; P:lipid metabolic process; P:sulfur compound metabolic process; P:biosynthetic process; P:biosynthetic process; F:oxidoreductase activity; F:transferase activity, transferring acyl groups; F:lyase activity; P:cell differentiation; C:protein-containing complex; F:ion binding; P:small molecule metabolic process; P:anatomical structure development…	EC:2.3.1.85; EC:3.1.2.14	Fatty-acid synthase; Oleoyl-[acyl-carrier-protein] hydrolase	Coil (COILS); IPR020843 (SMART); IPR020801 (SMART); IPR020841 (SMART); IPR020806 (SMART); SM00822 (SMART); G3DSA:3.40.50.150 (GENE3D); G3DSA:3.10.129.110 (GENE3D); IPR014030 (PFAM); G3DSA:3.90.180.10 (GENE3D); IPR029058 (G3DSA:3.40.50.GENE3D); IPR014031 (PFAM); IPR013968 (PFAM); IPR023102 (G3DSA:1.10.1470.GENE3D); G3DSA:3.30.70.3290 (GENE3D); IPR020807 (PFAM); IPR032821 (PFAM); G3DSA:3.40.50.720 …	F:GO:0003824; F:GO:0004312; P:GO:0008152; P:GO:0009058; F:GO:0016491; F:GO:0016740; F:GO:0016788; F:GO:0031177; P:GO:0055114	F:catalytic activity; F:fatty acid synthase activity; P:metabolic process; P:biosynthetic process; F:oxidoreductase activity; F:transferase activity; F:hydrolase activity, acting on ester bonds; F:phosphopantetheine binding; P:oxidation-reduction process
TRUE	[INTERPRO, BLASTED, MAPPED, GO-SLIM]	DERPT_G5674	: Full=Fatty acid synthase Includes: ame: Full=[Acyl-carrier- ] S-acetyltransferase Includes: ame: Full=[Acyl-carrier- ] S-malonyltransferase Includes: ame: Full=3-oxoacyl-[acyl-carrier- ] synthase Includes: ame: Full=3-oxoacyl-[acyl-carrier- ] reductase Includes: ame: Full=3-hydroxyacyl-[acyl-carrier- ] dehydratase Includes: ame: Full=Enoyl-[acyl-carrier- ] reductase Includes: ame: Full=Oleoyl-	2515	20	0	52.1	16	P:GO:0002376; C:GO:0005739; C:GO:0005829; P:GO:0006629; P:GO:0006790; P:GO:0009058; P:GO:0009058; F:GO:0016491; F:GO:0016746; F:GO:0016829; P:GO:0030154; C:GO:0032991; F:GO:0043167; P:GO:0044281; P:GO:0048856; P:GO:0051186	P:immune system process; C:mitochondrion; C:cytosol; P:lipid metabolic process; P:sulfur compound metabolic process; P:biosynthetic process; P:biosynthetic process; F:oxidoreductase activity; F:transferase activity, transferring acyl groups; F:lyase activity; P:cell differentiation; C:protein-containing complex; F:ion binding; P:small molecule metabolic process; P:anatomical structure development…	EC:2.3.1.85; EC:3.1.2.14	Fatty-acid synthase; Oleoyl-[acyl-carrier-protein] hydrolase	Coil (COILS); SM00822 (SMART); IPR020841 (SMART); IPR020801 (SMART); IPR020807 (SMART); IPR020843 (SMART); IPR020806 (SMART); IPR020807 (PFAM); IPR023102 (G3DSA:1.10.1470.GENE3D); G3DSA:3.10.129.110 (GENE3D); G3DSA:3.30.70.3290 (GENE3D); IPR014043 (PFAM); IPR013149 (PFAM); G3DSA:3.40.50.720 (GENE3D); IPR013968 (PFAM); IPR014030 (PFAM); G3DSA:3.90.180.10 (GENE3D); IPR014031 (PFAM); IPR001227 (G3DS…	F:GO:0003824; F:GO:0004312; P:GO:0008152; P:GO:0009058; F:GO:0016491; F:GO:0016740; F:GO:0016788; F:GO:0031177; P:GO:0055114	F:catalytic activity; F:fatty acid synthase activity; P:metabolic process; P:biosynthetic process; F:oxidoreductase activity; F:transferase activity; F:hydrolase activity, acting on ester bonds; F:phosphopantetheine binding; P:oxidation-reduction process
TRUE	[INTERPRO, BLASTED, MAPPED, GO-SLIM]	DERPT_G294	: Full=Fatty acid synthase Includes: ame: Full=[Acyl-carrier- ] S-acetyltransferase Includes: ame: Full=[Acyl-carrier- ] S-malonyltransferase Includes: ame: Full=3-oxoacyl-[acyl-carrier- ] synthase Includes: ame: Full=3-oxoacyl-[acyl-carrier- ] reductase Includes: ame: Full=3-hydroxyacyl-[acyl-carrier- ] dehydratase Includes: ame: Full=Enoyl-[acyl-carrier- ] reductase Includes: ame: Full=Oleoyl-	3353	20	0	56.35	25	P:GO:0000003; P:GO:0002376; C:GO:0005739; C:GO:0005829; C:GO:0005886; P:GO:0006629; P:GO:0007165; P:GO:0007267; P:GO:0008283; P:GO:0009058; P:GO:0009058; P:GO:0009790; F:GO:0016491; F:GO:0016746; F:GO:0016829; F:GO:0016853; P:GO:0022607; F:GO:0022857; P:GO:0030154; C:GO:0032991; P:GO:0034330; P:GO:0042592; F:GO:0043167; P:GO:0044281; P:GO:0048646	P:reproduction; P:immune system process; C:mitochondrion; C:cytosol; C:plasma membrane; P:lipid metabolic process; P:signal transduction; P:cell-cell signaling; P:cell proliferation; P:biosynthetic process; P:biosynthetic process; P:embryo development; F:oxidoreductase activity; F:transferase activity, transferring acyl groups; F:lyase activity; F:isomerase activity; P:cellular component assembly…	EC:2.3.1.85; EC:5.3.99.3; EC:2.3.1.41; EC:4.2.1.61; EC:3.1.2.14; EC:2.3.1.38; EC:4.2.1.59; EC:1.1.1.100; EC:2.3.1.39; EC:1.3.1.10	Fatty-acid synthase; Prostaglandin-E synthase; Beta-ketoacyl-[acyl-carrier-protein] synthase I; Carbon-oxygen lyases; Oleoyl-[acyl-carrier-protein] hydrolase; [Acyl-carrier-protein] S-acetyltransferase; 3-hydroxyacyl-[acyl-carrier-protein] dehydratase; 3-oxoacyl-[acyl-carrier-protein] reductase; [Acyl-carrier-protein] S-malonyltransferase; Enoyl-[acyl-carrier-protein] reductase (NADPH, Si-specifi…	IPR000990 (PRINTS); IPR020806 (SMART); IPR020801 (SMART); IPR020843 (SMART); SM00822 (SMART); IPR020841 (SMART); IPR000990 (PFAM); IPR004045 (PFAM); IPR016039 (G3DSA:3.40.47.GENE3D); IPR023102 (G3DSA:1.10.1470.GENE3D); G3DSA:3.40.30.10 (GENE3D); IPR029058 (G3DSA:3.40.50.GENE3D); IPR014030 (PFAM); G3DSA:3.40.50.720 (GENE3D); IPR036736 (G3DSA:1.10.1200.GENE3D); IPR032821 (PFAM); G3DSA:3.10.129.110 …	F:GO:0003824; F:GO:0004312; F:GO:0005515; C:GO:0005921; P:GO:0008152; F:GO:0009055; F:GO:0015035; F:GO:0016491; F:GO:0016740; F:GO:0031177; P:GO:0045454; F:GO:0050220; P:GO:0055114	F:catalytic activity; F:fatty acid synthase activity; F:protein binding; C:gap junction; P:metabolic process; F:electron transfer activity; F:protein disulfide oxidoreductase activity; F:oxidoreductase activity; F:transferase activity; F:phosphopantetheine binding; P:cell redox homeostasis; F:prostaglandin-E synthase activity; P:oxidation-reduction process
TRUE	[INTERPRO, BLASTED, MAPPED, GO-SLIM]	DERPT_G9752	: Full=N-alpha-acetyltransferase auxiliary subunit ame: Full=NMDA receptor-regulated 1 Short=NARG1	971	9	0	57.73	9	C:GO:0005576; C:GO:0005634; C:GO:0005737; P:GO:0006464; P:GO:0008219; P:GO:0009058; F:GO:0016746; C:GO:0032991; P:GO:0034641	C:extracellular region; C:nucleus; C:cytoplasm; P:cellular protein modification process; P:cell death; P:biosynthetic process; F:transferase activity, transferring acyl groups; C:protein-containing complex; P:cellular nitrogen compound metabolic process	EC:2.3.1.88	Acyltransferases	Coil (COILS); IPR019734 (SMART); IPR019734 (PFAM); G3DSA:1.25.40.1010 (GENE3D); IPR021183 (PFAM); IPR021183 (PIRSF); PTHR22767:SF5 (PANTHER); PTHR22767 (PANTHER); IPR013026 (PROSITE_PROFILES); IPR013026 (PROSITE_PROFILES); IPR011990 (SUPERFAMILY); IPR011990 (SUPERFAMILY)	F:GO:0005515	F:protein binding
TRUE	[INTERPRO, BLASTED, MAPPED, GO-SLIM]	DERPT_G3063	: Full=N-alpha-acetyltransferase 20 ame: Full=Methionine N-acetyltransferase ame: Full=N-acetyltransferase 5 ame: Full=N-terminal acetyltransferase B complex catalytic subunit NAA20 ame: Full=N-terminal acetyltransferase B complex catalytic subunit NAT5 Short= complex subunit NAT5 ame: Full= catalytic subunit	183	20	1.25061e-96	70.38	11	P:GO:0000003; C:GO:0005730; C:GO:0005829; C:GO:0005840; P:GO:0006464; P:GO:0007568; P:GO:0009058; P:GO:0009790; F:GO:0016746; P:GO:0034641; P:GO:0051276	P:reproduction; C:nucleolus; C:cytosol; C:ribosome; P:cellular protein modification process; P:aging; P:biosynthetic process; P:embryo development; F:transferase activity, transferring acyl groups; P:cellular nitrogen compound metabolic process; P:chromosome organization	EC:2.3.1.88	Acyltransferases	IPR000182 (PFAM); G3DSA:3.40.630.30 (GENE3D); mobidb-lite (MOBIDB_LITE); PTHR23091 (PANTHER); PTHR23091:SF282 (PANTHER); IPR000182 (PROSITE_PROFILES); cd04301 (CDD); IPR016181 (SUPERFAMILY)	no GO terms	no GO terms
TRUE	[INTERPRO, BLASTED, MAPPED, GO-SLIM]	DERPT_G9317	: Full=Glycylpeptide N-tetradecanoyltransferase ame: Full=Myristoyl- : N-myristoyltransferase Short=NMT ame: Full=Peptide N-myristoyltransferase	513	20	3.8263e-171	66.05	19	P:GO:0000003; P:GO:0000902; C:GO:0005794; C:GO:0005829; C:GO:0005840; C:GO:0005856; C:GO:0005886; P:GO:0006464; P:GO:0006629; F:GO:0008168; P:GO:0009058; P:GO:0009058; P:GO:0009790; F:GO:0016746; P:GO:0030154; P:GO:0034641; P:GO:0040007; P:GO:0040011; P:GO:0050877	P:reproduction; P:cell morphogenesis; C:Golgi apparatus; C:cytosol; C:ribosome; C:cytoskeleton; C:plasma membrane; P:cellular protein modification process; P:lipid metabolic process; F:methyltransferase activity; P:biosynthetic process; P:biosynthetic process; P:embryo development; F:transferase activity, transferring acyl groups; P:cell differentiation; P:cellular nitrogen compound metabolic pro…	EC:2.3.1.97; EC:2.1.1.103	Glycylpeptide N-tetradecanoyltransferase; Phosphoethanolamine N-methyltransferase	Coil (COILS); G3DSA:3.40.630.170 (GENE3D); IPR000903 (PIRSF); IPR022677 (PFAM); IPR022676 (PFAM); mobidb-lite (MOBIDB_LITE); IPR000903 (PANTHER); IPR022678 (PROSITE_PATTERNS); IPR022678 (PROSITE_PATTERNS); IPR016181 (SUPERFAMILY); IPR016181 (SUPERFAMILY)	F:GO:0004379; P:GO:0006499	F:glycylpeptide N-tetradecanoyltransferase activity; P:N-terminal protein myristoylation
TRUE	[INTERPRO, BLASTED, MAPPED, GO-SLIM]	DERPT_G1627	: Full= -glutamine gamma-glutamyltransferase K ame: Full=Epidermal TGase ame: Full=Transglutaminase K Short=TG(K) Short=TGK Short=TGase K ame: Full=Transglutaminase-1 Short=TGase-1	794	20	0	53.48	7	C:GO:0005737; C:GO:0005886; P:GO:0006464; P:GO:0006950; F:GO:0016746; P:GO:0030154; P:GO:0048856	C:cytoplasm; C:plasma membrane; P:cellular protein modification process; P:response to stress; F:transferase activity, transferring acyl groups; P:cell differentiation; P:anatomical structure development	EC:2.3.2.13	Protein-glutamine gamma-glutamyltransferase	IPR002931 (SMART); IPR001102 (PFAM); IPR036985 (G3DSA:3.90.260.GENE3D); IPR013783 (G3DSA:2.60.40.GENE3D); IPR013783 (G3DSA:2.60.40.GENE3D); IPR013783 (G3DSA:2.60.40.GENE3D); IPR008958 (PFAM); IPR023608 (PIRSF); IPR002931 (PFAM); mobidb-lite (MOBIDB_LITE); PTHR11590 (PANTHER); PTHR11590:SF69 (PANTHER); IPR036238 (SUPERFAMILY); IPR036238 (SUPERFAMILY); IPR038765 (SUPERFAMILY); IPR014756 (SUPERFAMIL…	F:GO:0003810; P:GO:0018149	F:protein-glutamine gamma-glutamyltransferase activity; P:peptide cross-linking
TRUE	[INTERPRO, BLASTED, MAPPED, GO-SLIM]	DERPT_G10444	: Full= -glutamine gamma-glutamyltransferase K ame: Full=Epidermal TGase ame: Full=Transglutaminase K Short=TG(K) Short=TGK Short=TGase K ame: Full=Transglutaminase-1 Short=TGase-1	974	20	0	54.51	13	C:GO:0005576; C:GO:0005737; C:GO:0005886; P:GO:0006464; P:GO:0006950; P:GO:0007165; F:GO:0016746; P:GO:0030154; P:GO:0042592; F:GO:0043167; C:GO:0043226; P:GO:0048856; P:GO:0065003	C:extracellular region; C:cytoplasm; C:plasma membrane; P:cellular protein modification process; P:response to stress; P:signal transduction; F:transferase activity, transferring acyl groups; P:cell differentiation; P:homeostatic process; F:ion binding; C:organelle; P:anatomical structure development; P:protein-containing complex assembly	EC:2.3.2.13	Protein-glutamine gamma-glutamyltransferase	IPR002931 (SMART); IPR013783 (G3DSA:2.60.40.GENE3D); IPR013783 (G3DSA:2.60.40.GENE3D); IPR013783 (G3DSA:2.60.40.GENE3D); IPR002931 (PFAM); IPR001102 (PFAM); IPR036985 (G3DSA:3.90.260.GENE3D); IPR008958 (PFAM); mobidb-lite (MOBIDB_LITE); CYTOPLASMIC_DOMAIN (PHOBIUS); NON_CYTOPLASMIC_DOMAIN (PHOBIUS); TRANSMEMBRANE (PHOBIUS); IPR036238 (SUPERFAMILY); IPR038765 (SUPERFAMILY); IPR014756 (SUPERFAMILY)…	F:GO:0003810; P:GO:0018149	F:protein-glutamine gamma-glutamyltransferase activity; P:peptide cross-linking
TRUE	[INTERPRO, BLASTED, MAPPED, GO-SLIM]	DERPT_G6991	: Full=Gamma-glutamylcyclotransferase	154	4	1.28297e-16	51.52	3	P:GO:0006790; F:GO:0016746; P:GO:0034641	P:sulfur compound metabolic process; F:transferase activity, transferring acyl groups; P:cellular nitrogen compound metabolic process	EC:2.3.2.4	Acyltransferases	G3DSA:3.10.490.10 (GENE3D); PF13772 (PFAM); PTHR12935:SF0 (PANTHER); IPR017939 (PANTHER); IPR013024 (CDD); IPR036568 (SUPERFAMILY)	F:GO:0003839	F:gamma-glutamylcyclotransferase activity
TRUE	[INTERPRO, BLASTED, MAPPED, GO-SLIM]	DERPT_G10140	: Full=Glutaminyl-peptide cyclotransferase ame: Full=Glutaminyl cyclase Short=QC ame: Full=Glutaminyl-tRNA cyclotransferase Flags: Precursor	359	14	7.07345e-82	60.51	6	C:GO:0005576; C:GO:0005737; P:GO:0006464; F:GO:0016746; F:GO:0043167; C:GO:0043226	C:extracellular region; C:cytoplasm; P:cellular protein modification process; F:transferase activity, transferring acyl groups; F:ion binding; C:organelle	EC:2.3.2.5	Glutaminyl-peptide cyclotransferase	IPR007484 (PFAM); G3DSA:3.40.630.10 (GENE3D); PTHR12283 (PANTHER); CYTOPLASMIC_DOMAIN (PHOBIUS); NON_CYTOPLASMIC_DOMAIN (PHOBIUS); TRANSMEMBRANE (PHOBIUS); IPR037457 (CDD); SSF53187 (SUPERFAMILY); TMhelix (TMHMM)	F:GO:0016603	F:glutaminyl-peptide cyclotransferase activity
[truncated: 3,634 more rows]
