# Supplementary material for: Proteome and allergenome of the European house dust mite Dermatophagoides pteronyssinus
Source: PLoS One. 2019 May 1;14(5):e0216171. doi: 10.1371/journal.pone.0216171 (PMC6493757; doi:10.1371/journal.pone.0216171)
Supplement: S9 Data — A) Proteomic results of all D. pteronyssinus airmid proteins (n = 1,849) identified from the mite body through combined proteomic strategy of whole extract protein analysis and gel filtration protein extract fractionation, followed by LC-MS/MS. B) List of the most specific GO terms (n = 167) differentially represented between the representative proteome and mite body proteome (<0.05 FDR) illustrating sample enrichment for proteins associated with mite body processes. C) List of enzyme names (n = 2) differentially represented between the representative proteome and mite body proteome (<0.05 FDR) illustrating sample enrichment for enzymes associated with mite body processes. D) List of InterPro IDs (n = 57) differentially represented between the representative proteome and mite body proteome (<0.05 FDR) illustrating sample enrichment of proteins with functional domains associated with mite body processes. (XLSX) [file pone.0216171.s013.xlsx]

## Sheet: A
T: Majority protein IDs	T: Fasta headers	Fractions	WE	LFQ intensity WC_A	LFQ intensity WC_B	LFQ intensity WC_C	LFQ intensity WC_D	LFQ intensity WC_E	LFQ intensity WC_F	LFQ intensity WC_G	LFQ intensity WC_H	LFQ intensity WC_I	LFQ intensity WC_J	LFQ intensity WC_K	LFQ intensity WC_L	LFQ intensity WC_M	LFQ intensity WC_O	LFQ intensity WC_P	LFQ intensity WC_Q	LFQ intensity WC_R	LFQ intensity WC_S	LFQ intensity WC_T	LFQ intensity WC_U	LFQ intensity WC_Y+1	LFQ intensity WC_Y+2	LFQ intensity WC_Y+3	LFQ intensity WC_Y+4	N: Peptides	N: Unique peptides	N: Sequence coverage [%]	N: Mol. weight [kDa]	N: Q-value	N: Score	N: Intensity	N: MS/MS count
DERPT_G9820	Der p14 Allergen;Proposed Sten-Allergen, Allergen Homolog (Der p14, Sar s14, Eur m14, Der f14) Full=Apolipo B-100 Short=Apo B-100 Contains: ame: Full=Apolipo B-48 Short=Apo B-48 Flags: Precursor extracellular space,vesicle,protein-containing complex,intra	20	4	35.3262	35.6074	36.2271	36.1113	36.6492	35.3892	32.7312	30.3095	28.8017	28.5954	28.4188	28.5848	29.7528	30.5653	30.3721	31.6937	32.3148	32.3498	32.4321	32.1357	34.8494	34.4759	35.3709	34.7125	261	261	88.8	191.41	0	323.31	2240000000000	4729
DERPT_G8046	Full=Myosin-7 ame: Full=Myosin heavy chain 7 ame: Full=Myosin heavy chain slow isoform Short= -slow ame: Full=Myosin heavy cardiac muscle beta isoform Short= -beta stress fiber,striated muscle myosin thick filament,intercalated disc,Z disc,A band,microfila	20	4	35.0777	35.7454	35.1256	34.0935	33.3758	33.3268	34.756	34.7251	33.9695	33.5528	34.2552	33.9104	33.0023	32.3358	32.2814	32.7794	32.5089	32.1076	32.0585	31.5293	31.9048	32.6426	32.4468	32.0739	297	297	76.2	249.02	0	323.31	1102900000000	3554
DERPT_G11558	Full=ATP synthase subunit mitochondrial Flags: Precursor mitochondrial proton-transporting ATP synthase complex, catalytic core F(1),nucleus,Golgi apparatus,lipid droplet,cytosol,cell surface,extracellular matrix,mitochondrial nucleoid,myelin sheath,extrac	20	4	30.5918	29.5882	32.3044	35.7492	34.5763	32.4149	32.5077	33.1776	31.2649	29.5001	29.0894	28.7697	28.904	30.2824	29.7515	30.2115	30.4099	30.1294	30.4521	30.0974	33.2531	32.6365	33.6051	33.2072	47	47	79.6	56.454	0	323.31	757480000000	1101
DERPT_G8792	Der p 2 Allergen;Proposed Mon-Allergen, Allergen Homolog (Der f2, Eur m2, Der s2)Full=Mite group 2 allergen Gly d ame: Allergen=Gly d protein binding,cholesterol transport,intracellular sterol transport	20	4	27.985	28.6477	29.3088	27.9142	27.8879	28.4884	28.1456	28.7603	30.32	33.9674	35.6527	35.5375	34.1804	31.877	31.8569	32.4649	32.4626	32.336	32.3228	32.3351	33.2008	32.7928	33.6066	33.0509	20	20	76.7	15.894	0	323.31	669970000000	419
DERPT_G8780	Der f30 like allergen: Full=Ferritin heavy chain Short=Ferritin H subunit Contains: ame: Full=Ferritin heavy N-terminally processed nucleus,mitochondrion,autolysosome,extracellular exosome,ferroxidase activity,ferric iron binding,intracellular sequestering	20	4	32.4257	34.3414	34.974	35.5171	34.7066	32.7481	29.9997	28.1593	28.1925	26.986	26.9123	27.9553	28.3421	28.8149	29.0981	30.6173	30.2507	30.5642	30.2741	29.7199	32.2873	31.1696	32.632	31.7713	27	27	99.4	20.774	0	323.31	601180000000	572
DERPT_G8047	Der p10 Allergen;Proposed Pan-Allergen, Allergen Homolog (Der p10, Aca s10, Pso o10, Sar s10, Blo t10): Full=Tropomyosin	20	4	29.9311	31.8981	34.0692	35.2268	33.6968	32.6968	32.4036	31.9473	31.1945	31.853	32.8581	34.1508	33.8646	32.3454	31.4963	31.5738	31.3522	30.6237	30.7595	30.0033	29.5098	30.6977	30.228	29.7707	51	51	81.7	32.972	0	323.31	540490000000	923
DERPT_G749	Allergen Homolog (Sal s3, Thua3): Full=Fructose-bisphosphate aldolase C ame: Full=Brain-type aldolase extracellular space,nuclear heterochromatin,mitochondrion,cytosol,cell-cell adherens junction,chloroplast,actin cytoskeleton,membrane,Z disc,axon,M band,s	20	4	29.0557	30.5375	32.2124	33.0235	33.5021	34.8944	33.87	31.3151	29.4423	28.4435	27.7474	28.6461	29.1988	29.6937	29.1133	30.0305	30.7964	30.7042	31.3105	31.2849	32.3109	32.1917	32.679	32.3942	42	42	85.9	39.351	0	323.31	493810000000	667
DERPT_G8381	Der p11 Allergen;Proposed StenAllergen, Allergen Homolog (Ani s2, Blo t11, Der f11, Der p11):Full=Paramyosin myosin complex,RNA binding,motor activity,pseudouridine synthase activity,pseudouridine synthesis,mesoderm development,myofibril assembly	20	4	35.2764	36.1694	35.0296	33.4764	32.4992	32.2808	32.3307	31.1465	30.3886	30.5762	31.0854	31.0617	30.2471	28.4389	27.3117	28.3991	28.2342	27.9841	28.1307	27.114	31.6425	31.8164	31.9582	31.5219	173	173	48.9	183.99	0	323.31	465740000000	1822
DERPT_G5156	Der f aldehyde dehydrogenase like allergen;Allergen homolog (Tyr p 35, Cla h3): Full=Retinal dehydrogenase 2 Short=RALDH 2 Short= 2 ame: Full=Aldehyde dehydrogenase family 1 member A2 ame: Full=Retinaldehyde-specific dehydrogenase type 2 Short=RALDH(II) n	20	4	28.486	30.1984	32.4928	33.6835	34.6511	34.426	31.7718	29.295	27.8003	26.9129	27.8297	27.7226	29.2016	28.8895	28.3266	29.7891	28.6513	29.6192	28.7776	28.1599	32.136	32.3196	32.2823	32.271	69	68	95.9	54.092	0	323.31	432420000000	840
DERPT_G3392	Allergen homolog (Tri a34, Asp vGAPDH): Full=Glyceraldehyde-3-phosphate dehydrogenase Short=GAPDH ame: Full=Peptidyl-cysteine S-nitrosylase GAPDH mitochondrion,lipid droplet,cytosol,microtubule associated complex,plasma membrane,Z disc,ribonucleoprotein co	20	4	27.2969	25.7627	27.7767	27.889	29.4574	33.6028	34.4519	31.7992	29.2216	25.1415	24.2064	23.6319	26.3027	28.4103	29.6008	28.9721	29.391	28.6014	28.6256	28.074	32.7744	32.6348	32.802	32.4794	53	52	98.5	35.734	0	323.31	395190000000	674
DERPT_G59	Der p20 Allergen;Allergen Homolog (Der f20, Lit v2, Chi o3) Proposed Pan-Allergen: Full=Arginine kinase Short=AK extracellular region,cytosol,plasma membrane,nucleotide binding,arginine kinase activity,phosphorylation,arginine metabolic process,proline me	20	4	29.0278	27.1343	28.7138	29.272	29.144	29.8674	30.3573	31.6785	34.4148	33.4161	31.1215	30.4082	31.1948	30.8963	29.8544	30.3306	30.1115	29.7597	29.8629	28.4287	32.6289	32.6692	31.8716	32.7031	57	40	85.1	43.828	0	323.31	365670000000	727
DERPT_G8007	Full=Myosin light chain kinase 3 ame: Full=Cardiac- -C-associated Ca kinase Short=Cardiac-MLCK nucleus,cytosol,endomembrane system,dendrite,A band,cell projection part,extracellular exosome,presynapse,postsynapse,calmodulin-dependent protein kinase activit	20	4	33.1586	33.825	34.9605	33.277	32.4762	31.9244	31.1681	31.3637	31.6653	30.5996	29.1506	27.9177	26.9522	26.5959	26.807	25.7419	24.4725	24.4906	23.7644	26.3956	32.1082	31.793	32.2393	31.7327	641	641	72	1001.6	0	323.31	354520000000	3580
DERPT_G3494	Full=Actin-1 Flags: Precursor lipid droplet,striated muscle thin filament,microtubule associated complex,actin filament,cell cortex,Ino80 complex,brahma complex,membrane raft,structural constituent of cytoskeleton,ATP binding,mitotic cytokinesis,nematode l	20	4	33.7825	32.5578	32.0153	31.7801	31.8892	32.0331	31.9679	32.6903	31.6063	29.4204	29.9411	30.5847	32.8564	33.8578	34.4915	33.5352	32.9891	32.1491	31.9967	31.7907	31.67	33.2088	31.9073	32.1811	53	24	86.2	41.596	0	323.31	353180000000	858
DERPT_G9697	Full=Sucrase- intestinal Contains: ame: Full=Sucrase Contains: ame: Full=Isomaltase extracellular region,cell wall,lysosome,membrane,alpha-1,4-glucosidase activity,carbohydrate binding,regulation of the force of heart contraction,diaphragm contraction,hear	20	4	25.9309	26.2528	28.7	29.328	30.3269	30.8963	31.6199	32.3606	32.8837	32.2135	31.788	32.1876	31.7897	30.3775	30.3217	30.8218	31.619	31.2026	31.5733	30.3403	32.982	32.5993	32.7351	32.4635	119	113	63.1	202.06	0	323.31	348340000000	1247
DERPT_G9149	Full=Lysosomal alpha-mannosidase Short=Laman ame: Full=Lysosomal acid alpha-mannosidase ame: Full=Mannosidase alpha class 2B member 1 ame: Full=Mannosidase alpha-B Flags: Precursor vacuolar membrane,plant-type cell wall,Golgi apparatus part,apoplast,alpha-	17	4	26.9631	28.8013	30.308	33.022	35.1631	33.5278	30.5882	26.604	24.0497	NaN	NaN	NaN	24.9679	25.5132	25.9459	25.6444	27.4929	25.8899	25.6362	25.6184	31.5089	30.9887	31.9317	31.2068	83	83	73.1	118.28	0	323.31	342020000000	826
DERPT_G1126	Full=60 kDa heat shock mitochondrial ame: Full=60 kDa chaperonin ame: Full=Chaperonin 60 Short=CPN60 ame: Full=Heat shock 60 Short=HSP-60 Short=Hsp60 Flags: Precursor extracellular space,mitochondrial matrix,early endosome,vacuolar membrane,peroxisomal mat	20	4	30.3435	33.1559	34.3552	34.3989	32.1642	30.2273	28.2452	25.932	25.924	26.1408	26.7975	26.6425	28.0442	28.2091	28.711	28.6045	29.0799	28.5987	29.2721	29.0172	31.5198	31.4385	31.8267	31.4795	75	75	86	63.091	0	323.31	277490000000	865
DERPT_G3346	Full=Peroxiredoxin-1 extracellular space,nuclear euchromatin,nucleolus,mitochondrial matrix,peroxisomal matrix,smooth endoplasmic reticulum,cytosol,microtubule associated complex,cell-cell adherens junction,extracellular matrix,melanosome,myelin sheath,ext	20	4	28.9918	29.7704	31.4552	33.4159	34.0507	32.722	30.6253	30.7922	31.1721	29.2285	27.2569	24.7085	27.1375	27.0969	27.4182	28.084	28.7536	28.2652	28.5334	28.5304	31.7728	31.4418	32.1926	31.4921	33	32	62.7	33.647	0	323.31	277210000000	465
DERPT_G7165	Full=ATP synthase subunit mitochondrial Flags: Precursor mitochondrial proton-transporting ATP synthase, catalytic core,lipid droplet,microtubule associated complex,COP9 signalosome,integral component of membrane,extracellular matrix,mitochondrial nucleoid	20	4	29.1804	26.4208	30.7889	34.6242	32.9974	30.4306	27.3938	23.1589	23.5492	26.0481	27.7418	27.3274	29.0362	29.1588	28.0321	27.8189	27.4673	27.2625	26.9753	26.711	31.9932	31.4916	32.6928	32.0168	59	59	72.5	60.409	0	323.31	274580000000	563
DERPT_G1283	Der p 1 Allergen, Proposed StenAllergenAllergen Homolog (Der f1, Der m1, Pso o1) : Full=Cathepsin L ase Flags: Precursor vacuole,cysteine-type peptidase activity,proteolysis,aging,response to hormone,response to carbohydrate	20	4	29.2072	28.4398	28.2969	27.3422	29.5673	30.5583	29.5332	29.8588	30.395	32.0187	33.0456	34.5869	35.2535	34.1029	34.6103	34.5933	34.5435	33.2085	33.4092	33.3511	32.2261	31.4521	31.4955	31.717	28	28	32.2	96.017	0	323.31	271200000000	966
DERPT_G7750	Proposed Pan-Allergen, Allergen Homolog (Tyr p 28, Der f28, Pen c19, Cla h4, Cor a10, Alt a3) Full=Heat shock cognate 71 kDa ame: Full=Heat shock 70 kDa 8 ubiquitin ligase complex,Prp19 complex,photoreceptor inner segment,perichromatin fibrils,nucleolus,m	20	4	26.3988	25.5896	28.1702	29.1239	30.6217	31.9567	33.3874	32.5476	33.8843	32.1661	30.1226	29.2996	29.0584	28.7301	29.0301	29.2699	29.7678	29.6849	29.9376	28.7563	30.6574	31.4701	29.0908	31.2713	68	26	48.7	112.63	0	323.31	260820000000	770
DERPT_G6183	Proposed StenAllergen, Allergen Homolog (Asp f MDH, Mal f4, Cit iMDH): Full=Malate mitochondrial Flags: Precursor cell wall,nucleoplasm,mitochondrial inner membrane,mitochondrial matrix,vacuolar membrane,Golgi apparatus,cytosol,plasma membrane,chloroplast	20	4	26.2677	25.264	25.9763	26.461	28.0408	29.3941	30.3213	33.6988	32.7955	30.4118	27.3894	26.7294	27.0943	27.8272	27.6635	28.1168	28.933	28.4836	27.8507	26.1641	32.2836	31.913	32.4244	31.9563	38	38	87.5	36.075	0	323.31	251100000000	446
DERPT_G5247	Der f EF elongation factor like Allergen: Full=Elongation factor 2 Short=EF-2 nucleus,lipid droplet,cytosol,microtubule associated complex,plasma membrane,cell-cell adherens junction,cell surface,aggresome,yeast-form cell wall,extracellular matrix,polysoma	20	4	27.3626	25.0114	24.9957	24.7338	26.485	27.9293	28.7111	30.5459	33.2403	33.5398	31.4866	29.4853	30.0247	30.1875	30.095	29.6349	30.5603	29.7612	29.9651	29.317	31.9538	31.8775	32.2826	32.0931	72	68	78.2	94.65	0	323.31	241030000000	765
DERPT_G12026	Der f enolase like Allergen;Allergen homolog (Bla g Enolase, Sal s 2, Bos D Enolase), LEA homology, Proposed Pan-Allergen: Full=Enolase ame: Full=2-phospho-D-glycerate hydro-lyase ame: Full=2-phosphoglycerate dehydratase phosphopyruvate hydratase complex,	20	4	24.9838	23.8443	26.5828	25.9528	26.1868	28.6224	31.8347	33.5466	32.0455	28.8631	26.2476	26.7281	27.4199	27.1229	26.4181	27.9576	28.5426	29.0405	28.8646	26.3556	32.2595	32.2545	31.7488	32.2357	52	51	84.3	47.394	0	323.31	238330000000	597
DERPT_G6623	---NA---	19	4	26.0871	23.5877	30.2547	32.1306	31.7974	33.6328	33.2104	31.6232	29.8176	29.5232	28.3339	26.0293	26.6192	26.325	26.2637	27.1293	25.8982	25.4499	26.6625	NaN	30.7801	30.355	31.8835	30.8316	30	30	70.1	27.811	0	323.31	229240000000	389
DERPT_G10989	kDa bacteriolytic enzyme	20	4	23.7961	24.7189	25.9322	24.9388	24.5816	25.2474	25.8799	26.1306	25.433	28.1341	31.1539	33.8826	35.1001	33.9788	32.56	32.6781	32.6022	31.8457	31.8328	31.9546	32.235	31.7589	32.1443	31.385	10	10	37	30.902	0	323.31	218940000000	320
DERPT_G10997	Allergen Homolog (Der p20, Der f20, Lit v2, Met e2, Bomb m1, Scy pa2, Plo t1, Bla g9, Per a 9): Full=Arginine kinase Short=AK extracellular region,cytosol,plasma membrane,LUBAC complex,arginine kinase activity,ubiquitin-protein transferase activity,ATP bin	20	4	29.5342	27.9631	28.4492	28.6222	29.1527	30.1437	30.2801	30.9943	33.0643	32.1774	30.3959	30.7284	30.8197	30.7254	29.9454	30.2132	30.0974	29.6796	29.6973	29.0859	31.9664	31.9054	30.4014	31.9988	55	38	15.1	251.69	0	323.31	207320000000	599
DERPT_G8964	Der p13 Allergen;Proposed StenAllergen, Allergen Homolog (Der p13, Der f13, Lep d13,Blo t13, Tyr p13, Aca s13) Full=Fatty acid-binding muscle ame: Full=M-FABP nucleoplasm,cytosol,cell-cell junction,cell projection,neuronal cell body,cell periphery,fatty a	20	4	26.9376	23.2434	24.2455	25.1403	22.761	23.0457	22.9663	22.8277	27.2849	31.8582	34.2688	34.039	31.985	30.1087	29.7474	29.7333	29.4347	28.1797	27.3321	27.5748	31.212	30.8176	31.6213	31.4885	24	24	90.8	14.981	0	323.31	197600000000	387
DERPT_G7520	Full=D-3-phosphoglycerate dehydrogenase Short=3-PGDH ame: Full=2-oxoglutarate reductase ame: Full=Malate dehydrogenase nucleus,mitochondrion,cytosol,chloroplast stroma,membrane,myelin sheath,phosphoglycerate dehydrogenase activity,protein binding,ATP bindi	20	4	27.5529	28.2901	30.7667	33.02	33.2524	31.7894	29.6701	28.058	26.6483	24.3448	24.2125	23.7212	25.0268	26.9715	25.6233	25.8007	24.8609	26.8136	26.6917	23.9688	31.4981	31.1493	32.0412	31.2445	51	51	88.1	57.312	0	323.31	192410000000	553
DERPT_G9110	Der f Actinin like allergen;Allergen Homolog (Der f24 )Full=Alpha-actinin-1 ame: Full=Alpha-actinin cytoskeletal isoform ame: Full=F-actin cross-linking ame: Full=Non-muscle alpha-actinin-1 stress fiber,ruffle,extracellular space,nucleus,cytosol,striated	20	4	28.0549	29.647	33.1034	34.2837	32.8711	30.1864	27.0498	25.4831	29.6698	29.845	28.6463	26.5437	26.3233	25.3835	23.1363	23.6285	26.1233	25.6219	26.6484	24.092	30.213	30.5064	30.4108	30.5296	108	108	62.1	149.56	0	323.31	192400000000	841
DERPT_G7424	Full=14-3-3 zeta mitochondrion,cytosol,microtubule associated complex,plasma membrane,cell-cell adherens junction,focal adhesion,cell cortex,postsynaptic density,cell leading edge,nuclear membrane,melanosome,mast cell granule,germline ring canal,perinuclea	20	4	28.2902	27.2165	28.2831	28.5823	29.2086	30.9289	33.5808	33.5647	31.0128	28.5232	27.9972	27.2731	28.3184	28.1661	28.7536	30.5627	30.9349	30.7006	31.6738	31.2249	30.2509	28.642	28.9639	28.899	40	38	92	31.425	0	323.31	186810000000	417
DERPT_G360	Der p4 allergen, Proposed StenAllergen Allergen homolog (Der f4, Blo t4, Aca s4, Eur m4): Full=Alpha-amylase-related Flags: Precursor extracellular space,extracellular exosome,alpha-amylase activity,protein binding,metal ion binding,digestion,starch metabo	20	4	21.1323	20.711	25.0591	23.2832	21.4781	22.6906	24.4211	26.3148	30.7778	32.8346	31.4251	30.9743	28.4133	27.5754	26.8083	28.477	28.167	26.5397	26.5995	24.3031	32.0967	31.9581	32.8259	31.6517	47	45	76.9	60.289	0	323.31	180190000000	410
DERPT_G6676	Full=Acetylcholinesterase Short=A Flags: Precursor endoplasmic reticulum,plasma membrane,extracellular region part,intracellular organelle part,synapse,neuron part,cholinesterase activity,protein binding,neurotransmitter metabolic process,response to chemi	17	4	19.086	18.9137	27.8024	32.0059	33.7613	32.4653	29.0901	23.5588	18.2225	19.755	21.5581	24.7593	22.4802	22.435	23.7269	NaN	23.2275	21.96	NaN	NaN	31.1877	30.8515	31.6237	31.1508	64	64	44.7	178.19	0	323.31	176510000000	620
DERPT_G7876	Full=Alpha-actinin-3 ame: Full=Alpha-actinin skeletal muscle isoform 3 ame: Full=F-actin cross-linking stress fiber,nucleus,cytosol,actin filament,brush border,fascia adherens,postsynaptic density,Z disc,secretory granule,dendrite,axolemma,M band,cuticular	20	4	25.9432	26.4288	29.7681	31.0835	32.7039	32.4364	31.6266	30.9917	31.0434	30.1793	28.9872	26.458	26.4899	26.1932	26.5132	25.5843	25.5601	26.6088	25.8407	25.6593	31.399	31.0899	31.1999	31.0947	147	147	69	175.28	0	323.31	172410000000	1040
DERPT_G3105	Glu1: Full=Beta-glucanase ame: Full=1,3-1,4-beta-D-glucan 4-glucanohydrolase ame: Full=Endo-beta-1,3-1,4 glucanase ame: Full=Lichenase Flags: Precursor hydrolase activity, hydrolyzing O-glycosyl compounds,carbohydrate metabolic process	17	4	22.1744	NaN	22.3378	NaN	NaN	21.5209	21.288	21.8017	22.6309	25.1658	31.2634	34.2879	33.3856	30.0352	29.2728	30.514	31.0193	28.3664	28.2571	27.8142	31.4295	31.1614	32.0316	30.9634	27	27	77.9	31.724	0	323.31	159130000000	374
DERPT_G5615	Der f16 like allergen: Full=Villin-1 extracellular space,cytosol,actin filament,filopodium,cell leading edge,phospholipid binding,actin filament binding,system process,phagocytosis,positive regulation of gene expression,regulation of neuron projection deve	20	4	30.324	29.5361	29.3811	29.2098	29.4692	30.5685	31.431	32.3444	31.9889	31.0508	30.0182	29.2742	29.3779	29.4438	28.8672	28.8893	29.4053	28.8162	28.4824	28.1473	31.0724	31.3292	29.6386	31.0839	69	69	92.1	55.424	0	323.31	154610000000	718
DERPT_G5294	Full=Vitellogenin-3 Flags: Precursor lipid transporter activity,lipid transport	20	4	30.3523	30.017	31.0898	31.8749	32.2953	32.303	30.1807	27.8745	29.8737	30.3473	27.9103	28.7366	28.5217	28.6694	27.6229	27.5414	25.8978	27.5265	26.2975	24.7329	31.0784	30.5632	31.2541	31.4164	142	142	66.7	219.53	0	323.31	151130000000	1084
DERPT_G8125	Full=Serpin B8 extracellular space,cytoplasm,membrane,membrane-bounded organelle,protein binding,negative regulation of biosynthetic process,positive regulation of signal transduction,response to organic substance,regulation of lipid metabolic process,nega	20	4	23.8779	21.9899	19.8939	21.7974	21.8207	24.614	27.8803	32.1222	33.3182	30.7861	26.9094	25.061	26.4262	27.4228	26.8909	25.6733	27.9861	25.8078	25.9678	25.0742	31.1026	31.0494	31.6036	31.1267	41	40	46.7	88.409	0	323.31	147090000000	422
DERPT_G5877	Proposed Pan-Allergen, Allergen Homolog (Aed a8, Cor a10, Der f28, Pen c19, Gly d10, Blo t10): Full=78 kDa glucose-regulated Short=GRP-78 ame: Full=Heat shock 70 kDa 5 ame: Full=Immunoglobulin heavy chain-binding Short= Flags: Precursor extracellular space	20	4	22.1919	24.5634	27.2645	28.7251	30.2904	31.8709	32.9216	31.8409	32.1387	30.3559	27.2021	23.6707	27.0702	27.3182	26.7637	26.7791	27.6183	27.2856	27.5734	27.1049	30.191	30.5002	28.4788	30.6574	59	32	64.4	73.409	0	323.31	141150000000	589
DERPT_G8938	Full=Probable cytosol aminopeptidase ame: Full=Leucine aminopeptidase Short=LAP ame: Full=Leucyl aminopeptidase nucleoplasm,mitochondrion,trans-Golgi network,focal adhesion,extracellular exosome,aminopeptidase activity,metalloexopeptidase activity,manganes	19	4	27.5051	29.2219	31.1948	32.2959	32.9349	31.451	29.4662	28.1566	26.5116	24.8893	NaN	25.3494	27.1947	28.3974	28.9232	30.2254	30.655	30.4055	30.2797	30.1433	30.9461	30.7545	31.0081	30.793	46	46	73.1	61.988	0	323.31	137690000000	480
DERPT_G9515	Full=Inosine-5 -monophosphate dehydrogenase Short=IMP dehydrogenase Short=IMPD Short=IMPDH nucleoplasm,peroxisomal membrane,cell junction,extracellular exosome,nucleotide binding,DNA binding,mRNA binding,IMP dehydrogenase activity,metal ion binding,eye dev	19	4	26.6676	28.2462	30.1506	32.9548	33.4684	31.7746	28.1829	24.9238	21.931	22.3191	NaN	23.3534	23.0396	25.4271	25.5255	25.9656	26.4549	23.528	26.8923	23.7822	30.23	29.8077	30.3601	29.7794	41	41	68.6	56.432	0	323.31	132220000000	363
DERPT_G7009	Full=S phase cyclin A-associated in the endoplasmic reticulum Short=S phase cyclin A-associated in the ER ame: Full=Zinc finger 291 catalytic activity,acetyl-CoA metabolic process	18	4	31.1995	29.2346	30.457	31.332	31.1981	32.1509	30.7587	28.3019	27.1029	24.346	NaN	NaN	26.2504	25.4409	26.7651	28.2544	27.9625	27.9174	28.6103	28.952	31.0568	30.6101	31.6008	30.7931	29	29	22.5	184.68	0	323.31	129560000000	468
DERPT_G114	Proposed StenAllergen, Allergen Homolog (ole e5, Sola 1 SOD): Full=Superoxide dismutase extracellular space,nucleus,mitochondrion,cytosol,plasma membrane,extracellular matrix,cytoplasmic vesicle,dendrite cytoplasm,neuronal cell body,protein-containing comp	18	4	NaN	NaN	22.0831	21.21	20.7073	22.4887	25.3945	28.6473	32.906	33.1719	30.4699	27.3361	27.0136	25.9566	24.9399	27.1724	26.7737	26.2477	26.0869	26.2827	31.1941	30.4526	31.4749	30.6162	14	14	96.1	15.713	0	323.31	127370000000	177
DERPT_G11532	Full=Probable cytosol aminopeptidase ame: Full=Leucine aminopeptidase Short=LAP ame: Full=Leucyl aminopeptidase cytoplasm,aminopeptidase activity,metalloexopeptidase activity,manganese ion binding,proteolysis	14	4	24.2052	26.1267	30.2663	33.4117	32.7744	29.7127	25.7214	23.8301	NaN	NaN	NaN	21.8408	NaN	22.1056	NaN	NaN	23.4744	26.0457	25.4897	21.2337	30.5355	30.3793	31.0811	30.4381	56	56	70.1	57.429	0	323.31	125940000000	414
DERPT_G8795	Allergen Homolog (Der f13): Full=Myelin P2 membrane-bounded organelle,cell body,intracellular part,fatty acid binding,startle response,nervous system development,cell proliferation,cell differentiation,regulation of response to external stimulus,negative r	20	4	26.7036	24.4483	24.0972	24.7233	24.0269	21.9925	24.4389	25.1516	27.8043	32.7626	33.8371	31.9416	30.8415	29.9682	29.0743	29.7251	29.9096	28.7155	28.67	28.6332	30.837	30.2263	30.1046	29.8989	31	31	92.3	16.479	0	323.31	123840000000	275
DERPT_G11084	Full=Actin-3 Flags: Precursor lipid droplet,striated muscle thin filament,microtubule associated complex,actin filament,plasma membrane,focal adhesion,cell cortex,Ino80 complex,brahma complex,membrane raft,dense body,structural constituent of cytoskeleton,	20	4	31.734	31.0379	29.4608	29.5037	29.6111	30.5654	30.4922	31.7427	30.7517	28.3103	27.2843	28.4143	29.5696	29.8908	29.8668	29.2555	29.8609	30.0304	30.446	30.1893	30.7982	31.4699	30.4145	31.0889	51	31	94.4	41.793	0	323.31	120470000000	423
DERPT_G9315	Full=Beta-galactosidase ame: Full=Acid beta-galactosidase Short=Lactase Flags: Precursor extracellular space,cytoplasm,intracellular membrane-bounded organelle,hydrolase activity, hydrolyzing O-glycosyl compounds,carbohydrate metabolic process	20	4	24.4104	25.0913	26.4876	26.3591	26.9024	28.4291	30.6626	32.3809	31.062	28.0688	24.8606	26.0794	26.8409	26.4337	26.326	26.2665	27.6962	27.3677	27.2959	25.8353	31.2163	30.8564	31.5042	30.8835	55	55	58.1	113.42	0	323.31	118060000000	412
DERPT_G11215	Full=3-oxoacyl- peroxisomal membrane,nuclear membrane,extracellular exosome,3-keto sterol reductase activity,carbonyl reductase (NADPH) activity,signaling receptor binding,serine-type peptidase activity,oxidoreductase activity, acting on NAD(P)H, quinone o	20	4	26.6602	26.3682	28.4031	29.9005	30.8391	31.4327	32.5718	30.5596	27.1038	23.187	25.6561	25.7426	26.4822	24.7895	22.463	23.4788	25.032	25.2804	24.8188	25.3714	30.8148	30.7427	30.8773	30.8274	82	82	79.7	110.9	0	323.31	117870000000	553
DERPT_G9052	Full=Glutamate dehydrogenase mitochondrial Short=GDH 2 Flags: Precursor mitochondrial inner membrane,mitochondrial matrix,vacuolar membrane,cytosol,glutamate dehydrogenase (NAD+) activity,glutamate dehydrogenase [NAD(P)+] activity,copper ion binding,ATP bi	11	4	21.7393	22.6383	30.5288	33.9585	31.468	29.0427	22.3811	19.712	NaN	NaN	NaN	NaN	22.5053	24.4558	NaN	NaN	23.7943	NaN	NaN	NaN	29.7192	29.9137	30.4576	29.5236	58	58	84.8	63.344	0	323.31	115760000000	377
DERPT_G10213	Full=Glutamate receptor kainate 3 Short= 3 ame: Full=Glutamate receptor 7 Short= -7 Short= 7 Flags: Precursor endoplasmic reticulum,synaptic vesicle,postsynaptic density,axon,AMPA glutamate receptor complex,kainate selective glutamate receptor complex,pres	15	4	23.5083	22.7905	25.9029	25.6286	27.8665	31.9958	32.053	30.5332	27.6706	27.0884	27.6747	28.0235	28.5151	27.1246	NaN	25.3302	NaN	NaN	NaN	NaN	30.8926	30.6754	31.3512	30.1473	30	30	36.4	99.772	0	323.31	111470000000	470
DERPT_G3387	Full=Myosin-4 ame: Full=Myosin heavy chain 2b Short= -2b ame: Full=Myosin heavy chain 4 striated muscle myosin thick filament,microfilament motor activity,double-stranded RNA binding,structural constituent of muscle,actin filament binding,muscle contractio	20	4	32.7111	33.3675	32.4425	31.4124	30.4103	30.215	30.7269	31.3081	30.5245	30.6867	31.2661	31.2335	29.7486	27.9679	25.9755	26.3314	26.2874	24.5951	24.8209	24.7827	28.7131	28.3516	29.3739	28.6854	127	127	77.1	112.08	0	323.31	110640000000	1216
DERPT_G3350	Der p15 Allergen: Full=PRKCA-binding ame: Full= interacting with C kinase 1 ame: Full= kinase C-alpha-binding extracellular region,mitochondrion,endoplasmic reticulum,Golgi apparatus,postsynaptic density,dendrite,presynaptic membrane,protein-containing com	15	4	NaN	20.5816	27.6017	30.6518	32.843	31.5498	28.5832	24.2271	24.8913	NaN	22.6138	NaN	NaN	22.0502	23.0166	24.4556	23.9249	22.5058	NaN	22.813	30.9351	30.5486	31.0967	30.4989	45	45	26.3	183.41	0	323.31	110200000000	398
DERPT_G7060	Full=Phosphoribosylaminoimidazole-succinocarboxamide synthase ame: Full=SAICAR synthetase cytosol,phosphoribosylaminoimidazolesuccinocarboxamide synthase activity,binding,carboxy-lyase activity,inter-male aggressive behavior,de novo IMP biosynthetic proc	16	4	23.7698	24.422	31.272	33.1842	31.2877	28.8552	24.3924	20.6744	20.389	NaN	NaN	21.8629	23.7091	22.9133	21.9096	22.8841	22.0418	22.5768	NaN	NaN	30.6103	31.2418	30.6437	30.7917	47	47	60	61.459	0	323.31	109790000000	358
DERPT_G9256	Full=Laminin subunit beta-1 ame: Full=Laminin B1 chain ame: Full=Laminin-1 subunit beta ame: Full=Laminin-10 subunit beta ame: Full=Laminin-12 subunit beta ame: Full=Laminin-2 subunit beta ame: Full=Laminin-6 subunit beta ame: Full=Laminin-8 subunit beta F	20	4	34.617	34.0877	32.6044	31.1116	29.706	28.8734	29.5432	29.3471	29.6746	28.833	26.5873	26.2756	26.4997	24.171	28.363	27.2713	26.7484	26.3195	26.1293	24.5318	29.7592	29.5906	29.6155	29.4713	138	138	57.8	221.9	0	323.31	102860000000	839
DERPT_G6990	Der f25 like Allergen, Proposed Pan-Allergen: Full=Triosephosphate isomerase Short=TIM ame: Full=Triose-phosphate isomerase extracellular space,nucleus,cytosol,Z disc,M band,extracellular exosome,triose-phosphate isomerase activity,ubiquitin protein ligase	18	4	NaN	21.7906	23.942	23.7527	22.1943	24.2143	27.1222	31.4381	32.5912	30.3121	27.3798	24.8286	26.3494	26.7717	27.2243	25.8516	25.8776	28.0554	25.2967	NaN	30.9945	30.3951	31.2587	30.534	29	29	80	30.037	0	323.31	100280000000	293
DERPT_G9544	Full= disulfide-isomerase Short=PDI ame: Full=Cellular thyroid hormone-binding ame: Full=Prolyl 4-hydroxylase subunit beta ame: Full=p55 Flags: Precursor extracellular space,nuclear envelope,mitochondrion,vacuolar membrane,rough endoplasmic reticulum,endop	20	4	26.3899	22.7624	21.9117	23.1786	22.9691	26.8525	29.2956	32.4947	31.8035	30.3942	29.7372	28.7778	28.5005	27.1446	27.6413	28.9152	27.9436	25.5684	25.6183	26.3149	30.282	29.7174	31.3133	30.2596	55	55	26.8	186.47	0	323.31	93743000000	391
DERPT_G5338	782800EAT35948.1 AAEL011931-PA	20	4	28.4427	28.8949	29.0909	27.0973	26.6292	26.9146	27.0324	28.0182	30.8189	33.6842	32.295	30.0859	27.7529	27.7443	27.954	28.4305	28.9326	29.2188	29.2124	29.071	28.1265	27.8284	28.871	27.8934	35	35	78	27.436	0	323.31	93084000000	311
DERPT_G9650	Full=Filamin-C Short=FLN-C ame: Full=ABP-280 ame: Full=ABP-L ame: Full=Actin-binding ame: Full=Filamin-2 ame: Full=Gamma-filamin nucleus,trans-Golgi network,cytosol,brush border,adherens junction,sarcoplasm,Z disc,growth cone,filamentous actin,actin filame	13	4	NaN	NaN	NaN	NaN	NaN	23.7185	23.9329	24.3553	28.0156	31.6605	31.6341	31.1782	29.9487	28.0727	27.9579	27.7595	26.9142	25.666	NaN	NaN	30.9068	31.386	31.1358	31.2999	20	20	96.8	19.925	0	323.31	92725000000	204
DERPT_G11726	Full=Laminin subunit alpha-1 ame: Full=Laminin A chain ame: Full=Laminin-1 subunit alpha ame: Full=Laminin-3 subunit alpha ame: Full=S-laminin subunit alpha Short=S-LAM alpha Flags: Precursor laminin-1 complex,laminin-3 complex,extracellular space,cell-cel	18	4	35.1996	32.9264	32.047	29.6371	27.0632	27.7436	26.3077	24.7407	25.0381	23.4012	26.7817	24.7502	26.6353	26.5079	23.3055	23.096	23.1657	23.7414	NaN	NaN	29.2952	29.5656	28.4297	28.9927	200	192	60.3	338.65	0	323.31	91777000000	950
DERPT_G6328	Full=Uncharacterized UDP-glucosyltransferase UDP-glucosyltransferase activity,protein localization to paranode region of axon,cytoskeleton organization,steroid metabolic process,glycolipid biosynthetic process,paranodal junction assembly,neuron projection	20	4	26.4074	23.3684	24.2138	24.2284	24.6476	25.5722	27.4511	30.4895	31.9363	29.7093	27.0367	25.5801	27.1894	27.774	28.6555	28.033	29.3106	28.9833	27.6162	26.5211	31.2969	31.2955	30.9071	30.77	37	37	86.6	51.596	0	323.31	91226000000	376
DERPT_G11074	EGF-like domain-containing 2	16	4	34.4857	33.144	32.8745	30.8414	29.2002	28.4779	26.5729	24.553	25.0315	24.8988	21.2208	21.5109	NaN	23.3453	NaN	NaN	22.0626	20.9466	24.7091	NaN	29.401	29.0065	30.0197	29.0331	56	56	22.6	191.54	0	323.31	90769000000	524
DERPT_G4236	Full=Bifunctional purine biosynthesis Includes: ame: Full=Phosphoribosylaminoimidazolecarboxamide formyltransferase ame: Full=AICAR transformylase Includes: ame: Full=IMP cyclohydrolase ame: Full=ATIC ame: Full=IMP synthase ame: Full=Inosinicase cytosol,pl	20	4	27.4451	25.6985	27.3322	28.3006	28.5744	31.3528	32.5934	30.0765	28.7031	27.4527	26.2805	28.0651	28.775	28.663	29.4372	28.813	28.5388	25.9892	25.7626	24.8549	30.4713	30.719	28.2726	30.5563	63	63	86.8	64.835	0	323.31	90503000000	471
DERPT_G6717	Full= disulfide-isomerase A3 ame: Full=58 kDa glucose-regulated ame: Full=58 kDa microsomal Short=p58 ame: Full=Disulfide isomerase ER-60 ame: Full=Endoplasmic reticulum resident 57 Short=ER 57 Short=ERp57 ame: Full=Endoplasmic reticulum resident 60 Short=	19	4	23.0646	NaN	23.0479	23.969	23.1276	26.7278	30.5724	31.9723	30.9212	29.9787	30.839	31.1915	30.3351	29.3442	28.6956	28.0747	28.1861	27.1174	27.3283	26.6893	30.3712	30.4623	28.9842	30.6543	55	55	81	57.248	0	323.31	90319000000	427
DERPT_G3095	Full=Phosphatidylethanolamine-binding 1 Short=PEBP-1 ame: Full=HCNPpp Contains: ame: Full=Hippocampal cholinergic neurostimulating peptide Short=HCNP extracellular space,nucleus,mitochondrial outer membrane,rough endoplasmic reticulum,Golgi apparatus,cytos	15	4	NaN	NaN	21.7423	22.8221	NaN	NaN	NaN	24.462	28.2115	32.5812	32.5527	31.0276	29.383	27.7799	28.1332	26.2081	27.7178	26.212	25.4555	25.6792	30.7497	29.9505	30.9639	30.7178	23	23	68.6	26.653	0	323.31	90163000000	221
DERPT_G4157	---NA---	17	4	27.5302	24.8155	24.6424	23.7653	NaN	NaN	NaN	25.6708	29.9278	32.3186	32.1732	31.4515	29.9869	28.116	28.2547	28.8284	28.1757	28.635	28.1725	28.2715	30.604	29.9973	30.937	29.7939	11	11	73.3	24.512	0	323.31	88446000000	216
DERPT_G3359	Full=Phosphoribosylformylglycinamidine synthase Short=FGAM synthase Short=FGAMS ame: Full=Formylglycinamide ribonucleotide amidotransferase Short=FGAR amidotransferase Short=FGAR-AT mitochondrion,chloroplast stroma,phosphoribosylformylglycinamidine synthas	19	4	21.7699	21.303	25.5041	28.4245	29.193	31.7986	32.2433	29.6393	25.4027	21.5071	21.5411	21.7337	22.2016	23.4043	NaN	22.5622	24.8502	25.063	22.738	26.8816	30.6246	30.2383	28.8363	30.4511	91	91	71.7	148.24	0	323.31	85024000000	575
DERPT_G8785	Full=Acetylcholinesterase Short=A Flags: Precursor extracellular space,nuclear envelope,endoplasmic reticulum,plasma membrane,synapse,intracellular organelle lumen,neuron part,cholinesterase activity,protein binding,nervous system development,acetylcholine	12	4	22.4137	NaN	21.47	NaN	21.1469	25.724	30.733	31.9841	29.9936	24.2141	21.2793	21.9823	NaN	NaN	NaN	NaN	22.6508	22.9767	NaN	NaN	30.9638	30.8507	30.825	30.4049	38	33	70.9	62.315	0	323.31	84871000000	332
DERPT_G7120	Full=Enoyl- mitochondrial ame: Full=Enoyl- hydratase 1 ame: Full=Short-chain enoyl- hydratase Short=SCEH Flags: Precursor cell wall,mitochondrial matrix,plasma membrane,extracellular exosome,enoyl-CoA hydratase activity,protein binding,fatty acid beta-oxid	18	4	24.3987	25.0072	28.743	30.0221	30.1624	32.3337	32.171	29.3903	26.2252	25.0828	23.9284	23.6257	23.5412	23.247	NaN	22.9728	23.1443	25.0556	23.6161	NaN	29.7543	28.5588	30.5982	29.4428	38	38	86	31.4	0	323.31	84863000000	307
DERPT_G6611	Full=Cellular retinoic acid-binding 1 ame: Full=Cellular retinoic acid-binding I Short=CRABP-I cytosol,axon,intracellular membrane-bounded organelle,cell body fiber,retinoic acid binding,protein binding,embryonic forelimb morphogenesis,retinoic acid metabo	19	4	24.8673	NaN	20.4935	22.9473	23.4392	23.2711	24.1627	25.2052	27.4636	31.7319	32.4647	31.6614	30.443	30.054	26.7339	28.5024	27.9939	27.3295	26.4466	26.8445	30.1334	29.5375	30.8781	29.8379	19	19	31	47.076	0	323.31	84311000000	332
DERPT_G9486	Proposed Pan-Allergen, Allergen Homolog (Bla g6, Per a6, Tyr p24): Full=Calmodulin Short= spindle,cytosol,vesicle,cation channel complex,supramolecular fiber,calcium ion binding,enzyme binding,troponin I binding,reproduction,nematode larval development,mus	20	4	28.2035	28.23	27.601	27.6146	27.9666	27.945	29.6835	31.1033	32.8678	32.476	31.6441	29.9054	29.828	30.3281	29.6081	29.8885	29.4155	29.4769	30.0184	29.259	27.6589	27.7178	27.7323	27.7418	22	22	99.3	17.623	0	323.31	80027000000	307
DERPT_G791	Full=Calponin-2 ame: Full=Calponin smooth muscle ame: Full=Neutral calponin intracellular organelle,actin binding,cell adhesion,regulation of cell shape,regulation of gene expression,actomyosin structure organization,regulation of localization,regulation o	19	4	27.9263	25.9726	26.0013	NaN	24.9619	24.7979	24.5349	24.9416	27.8156	31.8056	32.7076	31.4704	30.1127	30.6554	29.7841	29.1446	28.1886	27.2548	26.2618	25.6541	30.0042	29.498	30.1428	29.3847	24	24	72.1	25.063	0	323.31	79922000000	265
DERPT_G1601	Allergen Homolog (Der p8): Full=Glutathione S-transferase 1-1 ame: Full=DDT-dehydrochlorinase ame: Full=GST class-theta glutathione transferase activity,protein binding,glutathione metabolic process,obsolete glutathione conjugation reaction	20	4	27.0166	24.8216	26.3871	26.7945	26.6036	27.7461	28.7126	31.2911	32.736	29.9171	28.0329	26.7933	27.8034	28.4658	28.7831	28.8944	28.9352	28.6002	27.9313	27.0618	30.2233	29.1257	30.7455	29.8358	31	31	92.5	26.651	0	323.31	78694000000	272
DERPT_G10535	Allergen homolog (Der p8, Der f8, tyr p8): Full=Glutathione S-transferase Mu 2 ame: Full=GST class-mu 2 ame: Full=GSTM2-2 extracellular region,myelin sheath,membrane-bounded organelle,cytoplasmic part,glutathione transferase activity,enzyme binding,protein	20	4	27.382	24.1612	25.9121	24.5086	24.6651	25.4734	26.0957	29.4529	32.4377	29.5394	28.1063	29.6039	28.9054	28.7323	28.5316	29.7473	29.8591	28.7754	27.8304	26.7551	31.4849	29.7712	29.9799	30.1521	36	36	97.2	25.621	0	323.31	78510000000	321
DERPT_G11832	Full=Malate cytoplasmic ame: Full=Cytosolic malate dehydrogenase extracellular space,nucleus,mitochondrion,vacuolar membrane,Golgi apparatus,centrosome,cytosol,plasma membrane,plasmodesma,chloroplast stroma,myelin sheath,apoplast,extracellular exosome,prot	19	4	23.3869	NaN	24.4963	25.0281	26.8719	28.5428	30.3817	32.1774	30.3799	26.1172	22.6123	22.0678	22.3233	25.0639	26.3972	22.3055	23.2463	25.3612	26.2256	22.9842	30.7235	30.2033	29.3532	30.2416	30	30	81.3	35.586	0	323.31	78418000000	273
DERPT_G404	LEA homology: Full=Laminin subunit gamma-1 ame: Full=Laminin B2 chain ame: Full=Laminin-1 subunit gamma ame: Full=Laminin-10 subunit gamma ame: Full=Laminin-11 subunit gamma ame: Full=Laminin-2 subunit gamma ame: Full=Laminin-3 subunit gamma ame: Full=Lami	17	4	34.4559	34.8706	33.0436	30.6422	28.3774	28.0751	27.3134	28.8724	28.5343	27.5378	28.4655	27.6652	27.4952	25.1798	25.597	NaN	24.0245	NaN	NaN	28.0547	30.0895	30.2709	29.3448	29.8823	122	122	60.1	188.07	0	323.31	78401000000	746
DERPT_G10061	Proposed Mon-Allergen, Allergen homolog (Bea b Ald, Typ 35, Cla h 10, ALTA10) : Full=Retinal dehydrogenase 2 Short=RALDH 2 Short= 2 ame: Full=Aldehyde dehydrogenase family 1 member A2 ame: Full=Retinaldehyde-specific dehydrogenase type 2 Short=RALDH(II) mi	19	4	25.7177	27.1169	29.6223	30.3978	31.971	32.4568	29.8994	26.328	22.4968	NaN	22.6051	24.106	24.6014	24.528	25.6007	26.2279	26.32	27.1269	27.2923	23.7968	29.8326	29.2862	30.0501	29.8096	36	35	28.6	147.99	0	323.31	77914000000	378
DERPT_G10871	---NA---	20	4	29.9776	27.3207	26.6749	24.1723	25.5967	26.5848	27.2182	28.1529	30.0435	31.5276	32.382	32.5376	32.3293	30.9529	29.9591	29.3323	29.2681	28.7262	28.4734	27.454	28.5893	29.0179	29.1794	28.0739	14	14	39.1	33.842	0	323.31	77773000000	213
DERPT_G10181	Full=Glutamine synthetase Short=GS ame: Full=Glutamate decarboxylase ame: Full=Glutamate--ammonia ligase nucleus,mitochondrion,rough endoplasmic reticulum,lipid droplet,perikaryon,myelin sheath,axon terminus,extracellular exosome,glial cell projection,magn	18	4	27.1236	27.8024	29.4218	30.3122	30.9007	29.9256	27.5531	22.3473	21.3964	NaN	NaN	25.6857	25.1344	25.541	25.6371	24.1367	22.316	23.7856	22.7009	24.3819	30.7011	31.342	29.3047	31.0387	31	28	90.1	40.599	0	323.31	70014000000	362
DERPT_G10570	Full=Aconitate mitochondrial Short=Aconitase ame: Full=Citrate hydro-lyase Flags: Precursor nucleus,cytosol,mitochondrial nucleoid,myelin sheath,double-stranded DNA binding,single-stranded DNA binding,aconitate hydratase activity,iron ion binding,3 iron, 4	18	4	26.2265	23.2469	21.098	20.8032	22.789	23.7742	29.0522	31.4557	29.615	24.3954	25.0107	28.4504	29.632	29.4589	25.9492	25.4132	25.0766	24.9428	NaN	NaN	30.9923	31.2551	28.5551	31.0186	55	55	66.2	85.617	0	323.31	68267000000	346
DERPT_G7725	Full=4-hydroxyphenylpyruvate dioxygenase ame: Full=4-hydroxyphenylpyruvic acid oxidase Short=4HPPD Short=HPD Short=HPPDase Golgi membrane,mitochondrion,endoplasmic reticulum membrane,cytosol,PML body,extracellular exosome,DNA binding,4-hydroxyphenylpyruvat	20	4	19.6839	19.7254	19.1476	19.3556	17.9771	24.0142	30.299	31.2821	28.9792	19.5058	19.6255	20.8229	22.2706	19.4275	22.1068	20.7382	21.9947	21.3787	20.5506	23.1806	30.8002	30.3955	30.9229	30.2116	46	46	15.3	253.31	0	323.31	67171000000	279
DERPT_G3626	--NA--	10	4	21.4143	NaN	21.5795	21.096	NaN	NaN	NaN	21.2759	25.8155	24.8685	26.0631	27.8843	24.7253	23.22	NaN	NaN	NaN	NaN	NaN	NaN	30.9466	29.646	31.8355	30.5544	15	15	16.1	99.156	0	323.31	64415000000	199
DERPT_G4158	Full=Leucine aminopeptidase 2 ame: Full=Leucyl aminopeptidase 2 Short=LAP2 Flags: Precursor extracellular space,lysosome,endoplasmic reticulum,Golgi apparatus,plasma membrane,integral component of membrane,extracellular exosome,carboxypeptidase activity,pr	11	4	NaN	24.4118	26.0335	26.6742	29.0555	31.4034	31.6361	30.1448	27.5975	24.0968	23.0301	NaN	NaN	24.2953	NaN	NaN	NaN	NaN	NaN	NaN	29.7794	29.23	30.5794	29.1136	28	28	60.1	53.733	0	323.31	64126000000	245
DERPT_G3669	Full=3-oxoacyl- cell wall,mitochondrial inner membrane,endoplasmic reticulum,lipid droplet,cytosol,microtubule associated complex,plasma membrane,chloroplast,mitochondrial nucleoid,amyloid-beta binding,3-hydroxyacyl-CoA dehydrogenase activity,estradiol 17-	13	4	23.6639	24.1159	25.9653	26.0058	27.2395	29.1158	31.8324	30.6033	27.5838	23.2256	22.3128	NaN	NaN	NaN	25.2487	NaN	NaN	25.2904	NaN	NaN	29.9123	29.8193	30.6108	29.7737	26	26	87.1	27.039	0	323.31	64100000000	218
DERPT_G249	Full=Adenosylhomocysteinase Short= cyase ame: Full=S-adenosyl-L-homocysteine hydrolase nucleus,cytosol,melanosome,neuron projection,extracellular exosome,nucleic acid binding,adenosylhomocysteinase activity,copper ion binding,ATP binding,identical protein	18	4	24.4204	24.278	28.5478	28.4204	30.2037	32.2256	29.7969	27.9698	26.6245	21.3944	NaN	20.9559	22.1595	20.7588	21.3518	22.1358	22.6605	24.131	NaN	22.5544	29.9335	29.6128	29.4561	30.1269	42	42	36.7	116.07	0	323.31	62981000000	301
DERPT_G9217	Allergen Homolog (Cand aPGCK): Full=Phosphoglycerate kinase 1 nucleus,cytosol,Z disc,M band,sperm fibrous sheath,membrane raft,extracellular exosome,phosphoglycerate kinase activity,protein binding,ATP binding,ADP binding,gluconeogenesis,chemical synaptic	20	4	28.7479	25.65	27.3531	27.8643	27.5896	28.1674	28.987	30.6735	30.8935	28.3149	23.651	23.7788	26.5483	26.488	25.999	22.8618	23.0388	24.4772	22.7273	22.4596	30.4351	30.401	30.489	30.0483	36	36	88.7	46.314	0	323.31	62002000000	344
DERPT_G3520	Full=Dihydrolipoyl mitochondrial ame: Full=Dihydrolipoamide dehydrogenase Flags: Precursor nucleoplasm,mitochondrial respiratory chain complex I,Golgi apparatus,cilium,glycine cleavage complex,mitochondrial pyruvate dehydrogenase complex,mitochondrial oxog	9	4	22.5571	NaN	21.4814	23.2744	24.6325	28.8868	32.2197	29.5844	26.8477	NaN	NaN	NaN	NaN	NaN	NaN	21.4702	NaN	NaN	NaN	NaN	29.9348	29.6058	30.1582	29.8411	45	45	79.7	54.905	0	323.31	61147000000	330
DERPT_G8042	Der p7 Allergen;Allergen homolog (Der f7) Full=Mite allergen Der p 7 ame: Full=Allergen Der p VII ame: Allergen=Der p 7 Flags: Precursor	18	4	26.485	25.823	26.4274	25.2487	24.7458	25.5157	25.9444	28.4045	31.6046	30.3249	28.4232	28.7378	28.5637	25.9831	24.3844	26.7345	24.6046	26.1809	NaN	NaN	29.5255	30.0119	30.8838	29.8656	13	13	53.7	28.549	0	323.31	59558000000	273
DERPT_G218	Full=Alpha-2-macroglobulin Short=Alpha-2-M Flags: Precursor extracellular space,endopeptidase inhibitor activity,growth factor binding,cytokine binding,cell differentiation,negative regulation of cellular protein metabolic process,animal organ development	12	4	25.6114	24.8659	26.9777	28.1375	31.4644	32.1774	29.6382	25.6188	21.9635	NaN	NaN	NaN	24.1136	24.6889	23.3538	NaN	NaN	NaN	NaN	NaN	29.7428	29.3471	29.4565	29.3264	67	67	48.6	178.84	0	323.31	58521000000	438
DERPT_G9816	---NA---	12	4	NaN	NaN	NaN	NaN	NaN	25.4927	NaN	NaN	NaN	26.1688	30.4891	33.2563	32.5162	31.2639	31.006	31.9192	31.6973	30.3272	29.8051	29.4783	30.0383	29.6467	28.6189	29.1799	9	9	71.1	16.736	0	323.31	58439000000	131
DERPT_G5606	Full=Glucose 1-dehydrogenase membrane,oxidoreductase activity, acting on the CH-OH group of donors, NAD or NADP as acceptor,xylulose metabolic process	15	4	25.7648	24.4225	27.2296	27.271	28.455	30.9753	31.9676	28.4237	24.7746	22.5752	22.4106	21.5758	23.7516	22.3971	NaN	NaN	NaN	24.9509	NaN	NaN	29.5035	29.6795	30.0797	28.9907	39	38	79.3	55.944	0	323.31	57561000000	303
DERPT_G7237	Full=Adenosine kinase Short=AK ame: Full=Adenosine 5 -phosphotransferase nucleoplasm,cytosol,plasma membrane,adenosine kinase activity,copper ion binding,carbohydrate kinase activity,carbohydrate metabolic process,adenosine salvage,dATP biosynthetic proces	19	4	24.5893	24.3881	25.5821	25.3704	24.4957	26.475	26.4345	26.7812	30.4203	30.166	28.8841	27.8651	27.265	27.8059	27.8455	28.6662	29.4003	28.4317	27.0237	NaN	30.6176	30.1435	30.8534	30.3072	33	33	84.9	40.484	0	323.31	57517000000	361
DERPT_G6423	Allergen Homolog (Cur i3): Full=Cytochrome c nucleus,mitochondrial inner membrane,mitochondrial intermembrane space,mitochondrial matrix,cytosol,respiratory chain,heme binding,electron transporter, transferring electrons from CoQH2-cytochrome c reductase c	13	4	NaN	NaN	21.3991	NaN	NaN	NaN	NaN	NaN	23.991	28.4379	32.4333	31.7134	31.0166	28.7483	28.6109	28.5292	27.7912	26.5278	26.9278	26.7783	29.8669	28.2804	30.7453	29.1759	17	17	76.4	11.757	0	323.31	56209000000	158
DERPT_G7108	Full=Isocitrate dehydrogenase mitochondrial inner membrane,peroxisome,cytosol,plasma membrane,cell-cell adherens junction,chloroplast,extracellular exosome,magnesium ion binding,isocitrate dehydrogenase (NADP+) activity,signaling receptor binding,protein h	18	4	NaN	22.8129	26.6947	27.9356	29.6303	30.3024	31.1448	30.7881	28.2712	21.6729	NaN	21.3993	22.1636	22.7003	21.6418	22.3728	25.6523	22.8761	22.6316	23.9213	29.9097	29.5669	29.9158	30.2055	39	36	76.5	46.495	0	323.31	55896000000	304
DERPT_G4309	Full=Dipeptidyl peptidase 3 ame: Full=Dipeptidyl aminopeptidase III ame: Full=Dipeptidyl arylamidase III ame: Full=Dipeptidyl peptidase III Short=DPP III ame: Full=Enkephalinase B nucleus,endoplasmic reticulum,cytosol,plasma membrane,integral component of	15	4	22.8059	NaN	23.4656	25.8334	26.8208	28.1515	30.4737	31.1458	28.0049	23.5612	NaN	NaN	23.4405	23.3795	22.1518	23.0865	22.9386	23.22	NaN	NaN	29.6019	30.5968	30.3128	29.575	62	62	38.5	171.51	0	323.31	55619000000	363
DERPT_G5921	Full=Calreticulin Flags: Precursor acrosomal vesicle,extracellular space,nucleus,smooth endoplasmic reticulum,Golgi apparatus,lipid droplet,cytosol,polysome,focal adhesion,external side of plasma membrane,midbody,extracellular matrix,sarcoplasmic reticulum	20	4	26.5502	24.3388	25.9645	24.811	27.3719	29.4364	30.6388	30.4504	29.5303	29.3357	29.4145	30.0802	28.7553	29.7742	30.6767	30.7129	29.2867	28.3948	27.4738	27.5222	30.1846	30.1714	30.2745	30.6586	42	42	24.6	135.38	0	323.31	55501000000	315
DERPT_G11610	Full=GILT Flags: Precursor intracellular part,oxidoreductase activity,immune system process	18	4	25.6673	NaN	NaN	22.2062	23.3539	22.5186	23.1689	25.5989	26.8509	30.7723	32.2826	31.927	30.243	29.3457	29.4885	29.6389	30.5762	29.2121	29.3812	29.865	29.175	28.7113	30.1331	28.6385	34	32	68	58.763	0	323.31	55471000000	283
DERPT_G8619	Full=3-hydroxyisobutyrate mitochondrial Short=HIBADH Flags: Precursor mitochondrion,lipid droplet,phosphogluconate dehydrogenase (decarboxylating) activity,3-hydroxyisobutyrate dehydrogenase activity,NAD binding,L-serine catabolic process,valine catabolic	12	4	NaN	22.827	26.0266	26.5912	27.3659	30.8376	31.8362	28.7235	25.2009	22.0139	NaN	23.0531	24.9968	27.0073	NaN	NaN	NaN	NaN	NaN	NaN	29.552	29.2135	30.2959	29.3123	30	30	90.9	35.514	0	323.31	55156000000	256
DERPT_G1693	Full=Succinate dehydrogenase assembly factor 2- mitochondrial Short=SDH assembly factor 2-A Short=SDHAF2-A Flags: Precursor mitochondrion,peroxisome,membrane,extracellular exosome,signaling receptor binding,copper ion binding,delta3,5-delta2,4-dienoyl-CoA	12	4	23.7338	24.8706	24.7353	26.9846	30.4622	32.068	31.1775	27.4279	22.1654	NaN	NaN	NaN	NaN	NaN	NaN	24.1806	24.5427	NaN	22.4983	NaN	29.4159	29.0346	29.9237	29.271	24	24	44.2	51.113	0	323.31	55056000000	165
DERPT_G7196	Full=Diaminopimelate decarboxylase Short=DAP decarboxylase Short=DAPDC diaminopimelate decarboxylase activity,lysine biosynthetic process via diaminopimelate	14	4	22.5248	23.4756	27.1813	27.6693	29.942	31.6729	30.865	27.5122	23.0893	NaN	NaN	NaN	22.6272	23.2471	NaN	22.7753	22.6142	23.3169	NaN	NaN	29.5695	29.0681	30.1312	29.0465	45	45	77.2	61.315	0	323.31	52432000000	326
DERPT_G5605	Der f32 like allergen: Full=Inorganic pyrophosphatase ame: Full=Pyrophosphate phospho-hydrolase Short=PPase mitochondrion,vacuole,cytosol,NURF complex,neuron projection,extracellular exosome,magnesium ion binding,cholinesterase activity,inorganic diphospha	19	4	20.1928	NaN	20.1671	22.9477	24.2332	26.7149	29.5819	32.4259	31.014	26.0601	22.8252	21.1607	24.2408	25.3304	23.4505	23.9905	24.7258	21.3117	21.8482	22.4081	28.1694	28.866	24.928	28.8075	59	59	37.3	166.87	0	323.31	52170000000	286
DERPT_G10233	Allergen homolog (Bos d AATr): Full=Aspartate cytoplasmic Short=c ame: Full=Cysteine cytoplasmic ame: Full=Cysteine cytoplasmic Short=cCAT ame: Full=Glutamate oxaloacetate transaminase 1 ame: Full=Transaminase A cell wall,nucleus,mitochondrion,lysosome,vac	17	4	NaN	NaN	21.245	22.2541	23.8791	27.5295	31.1611	31.4037	28.0752	22.8565	21.945	21.7989	24.8306	25.9623	NaN	22.5301	22.3321	22.5452	23.0161	22.2842	29.1894	29.4689	30.2019	29.6994	31	31	73.8	45.93	0	323.31	52124000000	185
DERPT_G9116	Full=Cathepsin B Contains: ame: Full=Cathepsin B light chain Contains: ame: Full=Cathepsin B heavy chain Flags: Precursor extracellular space,nucleolus,mitochondrion,lysosome,caveola,external side of plasma membrane,apical plasma membrane,sarcolemma,perinu	20	4	24.3836	24.4218	25.3164	24.9964	25.5872	26.5166	29.5689	29.9421	29.5684	31.2058	31.0991	29.3106	26.4266	26.3473	26.9893	28.1702	27.9773	28.5373	28.1307	28.1597	29.4973	28.7494	29.6229	29.1905	21	21	33	74.957	0	323.31	51966000000	248
DERPT_G7578	Full=Laminin subunit alpha-5 ame: Full=Laminin-10 subunit alpha ame: Full=Laminin-11 subunit alpha ame: Full=Laminin-15 subunit alpha Flags: Precursor laminin complex,cell part,protein binding,reproduction,cell morphogenesis involved in differentiation,res	17	4	32.5867	31.9137	31.6703	29.6248	28.8377	29.2492	28.3321	25.7781	29.2774	27.4601	26.4295	25.7392	25.7924	25.9581	25.1901	24.4348	22.5677	NaN	NaN	NaN	29.154	29.1835	28.8939	29.0488	189	189	52.8	423.5	0	323.31	51687000000	892
DERPT_G3683	Full=Glutamate receptor delta-2 Short= 2 Short= delta-2 subunit Flags: Precursor axon,kainate selective glutamate receptor complex,presynaptic membrane,neuronal cell body,dendritic spine,membrane-bounded organelle,intracellular part,postsynaptic membrane,i	20	4	27.5043	30.173	29.7516	28.5115	27.6579	28.2066	27.9446	28.9374	31.7091	31.3951	29.124	27.1832	27.805	27.4304	26.8055	26.3558	27.3709	26.1061	25.4156	22.9259	29.1331	29.006	27.9374	28.7728	36	36	76.9	32.754	0	323.31	50944000000	326
DERPT_G8859	Der p3 Allergen, Proposed StenAllergen, Allergen Homolog (Der p3, Der f3, Eur m3, Blo t3, Tyr p3) Full=Trypsin Flags: Precursor serine-type endopeptidase activity,proteolysis	18	4	28.7092	29.5513	29.5216	29.3832	30.1642	28.2401	28.1804	31.0202	30.5852	29.4159	26.6798	22.8798	NaN	NaN	25.797	25.0764	24.6996	24.6901	26.2068	26.3389	28.9715	28.7982	30.2604	28.2772	26	26	66.7	28.075	0	323.31	50704000000	250
DERPT_G3686	Full=Alpha-aminoadipic semialdehyde dehydrogenase Short=Alpha-AASA dehydrogenase ame: Full=Aldehyde dehydrogenase family 7 member A1 ame: Full=Antiquitin-1 ame: Full=Betaine aldehyde dehydrogenase ame: Full=Delta1-piperideine-6-carboxylate dehydrogenase Sh	19	4	22.1385	23.2287	28.5975	29.3912	30.3211	32.0882	30.5602	27.7499	24.7199	21.6799	NaN	22.531	23.5267	24.5904	25.9306	26.2325	26.6055	26.7096	27.0802	26.3888	29.2846	28.5633	28.9287	28.8777	38	38	77.9	56.27	0	323.31	50657000000	272
DERPT_G10574	Full=Hemicentin-1 ame: Full=Fibulin-6 Short=FIBL-6 Flags: Precursor extracellular region,sarcomere,membrane-bounded organelle,intracellular organelle part,protein kinase activity,Rho guanyl-nucleotide exchange factor activity,ATP binding,cytoskeletal prote	16	4	23.3639	24.3871	28.5675	29.1645	30.3807	29.5359	30.1539	28.9905	28.957	29.1696	27.7912	26.7146	26.5507	25.1953	25.4344	NaN	NaN	NaN	26.2843	NaN	29.6606	29.7612	29.4894	29.2733	157	157	35.7	575.82	0	323.31	50603000000	597
DERPT_G5601	secreted salivary gland [Ixodes scapularis] salivary [Ixodes scapularis] secreted salivary gland	20	4	24.2663	23.0966	24.2474	22.7449	23.4017	20.6432	22.2034	25.0177	29.6627	32.6761	31.4767	29.6185	27.9184	28.2076	26.27	27.8625	28.2233	28.6636	28.3236	27.5804	28.7957	28.6296	29.4108	28.671	19	17	28.9	58.572	0	323.31	49870000000	170
DERPT_G9653	Full=Dipeptidyl peptidase 1 ame: Full=Cathepsin C ame: Full=Cathepsin J ame: Full=Dipeptidyl peptidase I Short=DPP-I Short=DPPI ame: Full=Dipeptidyl transferase Contains: ame: Full=Dipeptidyl peptidase 1 exclusion domain chain ame: Full=Dipeptidyl peptidas	19	4	25.1762	NaN	22.331	24.4663	22.6028	27.9906	30.4883	29.6026	27.9512	25.154	28.1537	31.1893	32.8344	30.9766	29.7525	28.7179	28.5524	27.5453	25.2534	24.8297	29.5175	29.373	29.5091	30.1992	31	31	59.4	57.164	0	323.31	48078000000	272
DERPT_G9115	Full=Cathepsin B Contains: ame: Full=Cathepsin B light chain Contains: ame: Full=Cathepsin B heavy chain Flags: Precursor extracellular space,nucleolus,mitochondrion,lysosome,caveola,external side of plasma membrane,apical plasma membrane,sarcolemma,perinu	19	4	22.6589	NaN	25.6007	24.0184	22.4849	24.8027	25.7928	27.0062	27.97	29.3982	31.1716	31.8829	29.7032	28.3751	28.8877	29.1295	28.8939	29.7617	28.5217	26.0649	29.9698	28.8543	29.7598	29.0269	20	20	29.1	76.588	0	323.31	47993000000	286
DERPT_G8510	Full=Citrate mitochondrial ame: Full=Citrate (Si)-synthase Flags: Precursor nucleus,mitochondrial matrix,microtubule associated complex,extracellular exosome,citrate (Si)-synthase activity,dipeptidase activity,carbohydrate metabolic process,acetyl-CoA meta	16	4	25.5627	21.985	22.4926	22.8166	20.8805	25.3714	30.8521	30.5197	27.7581	22.1487	NaN	22.9911	23.8011	25.7207	23.4265	NaN	22.1101	21.9215	NaN	NaN	29.8154	29.8142	30.3932	29.9025	39	39	31.8	127.3	0	323.31	47868000000	239
DERPT_G7935	Full=Fumarylacetoacetase Short=FAA ame: Full=Beta-diketonase ame: Full=Fumarylacetoacetate hydrolase extracellular exosome,fumarylacetoacetase activity,arginine catabolic process,aromatic amino acid family catabolic process,tyrosine metabolic process,styre	13	4	21.3988	NaN	23.7267	24.6257	25.9091	28.2591	31.3366	30.7355	26.3956	22.3621	NaN	21.5691	22.5353	NaN	NaN	NaN	23.8669	22.4588	NaN	NaN	29.5105	28.7701	30.043	29.1678	40	40	96.5	47.854	0	323.31	46803000000	274
DERPT_G3573	Full=Trifunctional purine biosynthetic adenosine-3 Includes: ame: Full=Phosphoribosylamine--glycine ligase ame: Full=Glycinamide ribonucleotide synthetase Short=GARS ame: Full=Phosphoribosylglycinamide synthetase Includes: ame: Full=Phosphoribosylformylgly	13	4	23.7082	NaN	22.7213	23.8308	26.3492	28.2283	28.1314	29.6884	30.5598	26.7913	22.6522	22.281	20.6567	NaN	NaN	NaN	NaN	24.7915	NaN	NaN	29.9807	30.5406	29.8173	29.792	73	73	26.3	333.35	0	323.31	46752000000	366
DERPT_G784	Der p18 Allergen;Allergen homolog (Der f18, Blo t15) Full=Chitotriosidase-1 ame: Full=Chitinase-1 Flags: Precursor extracellular region,membrane-bounded organelle,cytoplasmic part,hydrolase activity, hydrolyzing O-glycosyl compounds,chitin binding,positiv	17	4	NaN	NaN	23.3106	22.8752	19.8247	25.4374	29.4665	31.4439	30.7857	28.9226	27.5841	27.787	28.2893	27.2004	26.0348	26.1734	26.4592	25.4025	25.6034	NaN	29.2131	28.9897	29.1701	28.5259	21	21	45.3	63.144	0	323.31	46333000000	218
DERPT_G7149	Full=Prostaglandin reductase-3 Short=PTGR-3 ame: Full=15-oxoprostaglandin 13-reductase ame: Full=Zinc-binding alcohol dehydrogenase domain-containing 2 mitochondrion,peroxisome,RNA binding,oxidoreductase activity, acting on the CH-CH group of donors, NAD o	8	4	NaN	NaN	21.3546	NaN	22.1716	25.4474	29.5717	30.8537	28.9125	24.911	NaN	NaN	NaN	23.2142	NaN	NaN	NaN	NaN	NaN	NaN	30.343	29.6893	29.9743	29.8532	23	23	72.4	37.489	0	323.31	46200000000	195
DERPT_G7454	Full=Troponin cardiac muscle Short= c ame: Full=Cardiac muscle troponin T Short=c troponin complex,calcium ion binding,protein binding,cellular calcium ion homeostasis,regulation of muscle contraction,mitochondrion organization,axonal fasciculation,mesoder	20	4	26.9498	23.7504	25.1049	22.4693	22.2965	23.9855	27.6734	28.751	30.2372	30.4014	31.7323	32.3696	31.6482	31.2308	30.2575	30.4961	30.0337	29.3262	28.1903	28.0344	27.7205	27.5606	28.0374	27.4279	23	23	47.2	49.233	0	323.31	45550000000	206
DERPT_G7229	Full=Proteasome subunit alpha type-1 nucleoplasm,vacuolar membrane,centrosome,microtubule associated complex,plasma membrane,plasmodesma,proteasome core complex, alpha-subunit complex,cytosolic ribosome,proteasome storage granule,nuclear outer membrane-end	11	4	26.9987	31.185	33.0527	30.5647	26.3949	23.7816	22.1566	NaN	NaN	NaN	NaN	22.6687	21.5441	NaN	NaN	21.5397	NaN	24.6751	NaN	NaN	28.1863	27.0452	28.9786	28.3259	30	30	76.2	32.297	0	323.31	44880000000	204
DERPT_G3194	Full=3-hydroxybutyryl- dehydrogenase ame: Full=Beta-hydroxybutyryl- dehydrogenase Short=BHBD cell wall,mitochondrial inner membrane,cytosol,plasma membrane,intracellular organelle lumen,translation initiation factor activity,3-hydroxyacyl-CoA dehydrogenase	20	4	27.6838	26.5757	27.1119	27.6422	27.7687	28.1929	28.7352	29.7855	29.2617	28.2356	27.6131	27.7334	28.3711	28.2397	27.3965	27.5032	28.5128	28.1679	28.9259	29.0939	29.8169	29.9143	27.9748	29.829	30	30	24.2	156.9	0	323.31	44584000000	282
DERPT_G3240	Full=Succinyl- :3-ketoacid coenzyme A transferase mitochondrial ame: Full=3-oxoacid -transferase 1 ame: Full=Somatic-type succinyl- :3-oxoacid -transferase Short=SCOT-s Flags: Precursor mitochondrion,motile cilium,3-oxoacid CoA-transferase activity,protein	17	4	21.9767	NaN	19.9233	20.609	21.3716	26.1694	30.9591	29.1987	24.5844	20.5665	23.7094	26.2455	25.9324	22.8142	23.166	22.0313	21.1516	NaN	NaN	23.1774	30.2044	29.8173	30.6104	29.3829	39	39	86.6	55.661	0	323.31	44409000000	251
DERPT_G4297	---NA---	18	4	24.6256	24.964	25.2164	25.98	29.4706	32.0315	30.5236	27.6193	27.6134	28.0835	25.8483	24.655	25.0638	23.2297	NaN	24.5911	24.0112	22.8524	NaN	21.8128	28.8653	28.2103	28.7561	28.3882	21	21	82.9	29.843	0	323.31	44218000000	239
DERPT_G6930	Full=Probable Xaa-Pro aminopeptidase PEPP ame: Full=Aminoacylproline aminopeptidase ame: Full=Prolidase extracellular exosome,aminopeptidase activity,dipeptidase activity,manganese ion binding,macromolecule metabolic process	13	4	20.9236	NaN	21.6663	23.5353	25.2701	27.7736	30.2366	30.7749	29.716	26.0021	21.6639	NaN	24.0965	24.7436	23.4646	NaN	NaN	NaN	NaN	NaN	29.5456	29.2757	30.0601	29.5189	40	40	70.7	65.002	0	323.31	44025000000	296
DERPT_G6394	Full=Proteasome subunit alpha type-7-like nucleus,cytoplasm,microtubule associated complex,proteasome core complex, alpha-subunit complex,extracellular exosome,spermatoproteasome complex,threonine-type endopeptidase activity,identical protein binding,repro	12	4	27.5139	30.3173	33.2281	30.1806	26.5619	23.2905	21.7628	NaN	NaN	NaN	NaN	NaN	NaN	23.0476	23.8503	24.4758	24.9277	22.6089	NaN	NaN	28.0504	26.7662	28.2217	27.8159	28	28	82	27.53	0	323.31	43511000000	163
DERPT_G8420	Full=Transketolase Short=TK nucleoplasm,peroxisome,endoplasmic reticulum membrane,myelin sheath,extracellular exosome,magnesium ion binding,transketolase activity,thiamine pyrophosphate binding,protein homodimerization activity,monosaccharide binding,gluco	18	4	26.4936	23.8705	22.136	22.055	22.6841	27.9729	29.5695	24.8527	21.5609	23.3429	25.7211	27.5853	29.2066	26.8841	25.0375	NaN	24.5463	23.8753	26.4243	NaN	30.342	30.3869	30.2092	30.4604	45	45	84.3	67.96	0	323.31	43252000000	336
DERPT_G99	Full=Elongation factor 1-alpha 1 Short=EF-1-alpha-1 ame: Full=Elongation factor Tu Short=EF-Tu ame: Full=Eukaryotic elongation factor 1 A-1 Short=eEF1A-1 extracellular space,nucleolus,lipid droplet,cytosol,eukaryotic translation elongation factor 1 complex	20	4	29.6017	26.5447	26.9968	27.0932	27.1091	27.513	28.1708	29.0859	28.2886	26.7967	26.6036	27.4538	28.4226	29.6083	30.1845	29.3093	29.4232	29.1494	28.6405	27.3687	29.8391	30.9555	28.5154	30.5891	28	25	76.6	50.611	0	323.31	42379000000	216
DERPT_G10584	Full=2,3-bisphosphoglycerate-independent phosphoglycerate mutase Short=BPG-independent PGAM Short=Phosphoglyceromutase Short=iPGM cytoplasm,phosphoglycerate mutase activity,manganese ion binding,reproduction,glucose catabolic process,multicellular organism	11	4	24.2142	NaN	21.5881	23.6272	23.0946	24.0343	26.2045	30.398	31.5751	27.4382	NaN	24.226	NaN	NaN	NaN	24.4564	NaN	NaN	NaN	NaN	28.1318	29.1165	28.6151	29.5217	39	39	78	64.432	0	323.31	41659000000	237
DERPT_G210	Full=Pyruvate kinase Short=PK nucleus,mitochondrion,lipid droplet,cytosol,plasma membrane,cell-cell adherens junction,cilium,cell surface,yeast-form cell wall,hyphal cell wall,extracellular matrix,P granule,myelin sheath,extracellular exosome,magnesium ion	19	4	28.7293	28.2907	30.3287	30.4803	30.7314	29.6583	27.184	23.5228	21.7418	21.5004	NaN	21.2455	23.9616	22.2651	22.1644	24.2071	24.4523	23.0028	23.2171	22.8851	29.561	29.6958	27.3781	29.6892	45	43	81.6	58.099	0	323.31	41658000000	353
DERPT_G8393	Full=Alcohol dehydrogenase class-3 ame: Full=Alcohol dehydrogenase class-III ame: Full=Glutathione-dependent formaldehyde dehydrogenase Short=FALDH Short=FDH Short=GSH-FDH ame: Full=S-(hydroxymethyl)glutathione dehydrogenase cytoplasmic part,alcohol dehydr	14	4	25.4033	22.7624	25.7972	25.6011	25.7009	27.4878	29.7993	30.2701	29.0416	26.3621	NaN	24.1423	25.1686	NaN	NaN	NaN	24.5182	24.5964	NaN	NaN	29.7717	29.1729	30.5322	29.5903	31	31	52.2	86.298	0	323.31	41547000000	205
DERPT_G5395	Full=GMP synthase cytosol,GMP synthase activity,GMP synthase (glutamine-hydrolyzing) activity,ATP binding,pyrophosphatase activity,GMP biosynthetic process,purine nucleobase biosynthetic process,glutamate metabolic process	17	4	25.028	20.8123	22.3967	23.8715	24.8694	26.5169	30.1	31.3597	28.9189	24.3963	27.7842	27.8902	26.8832	24.2471	20.9779	23.2895	22.4217	NaN	NaN	NaN	28.9594	29.8465	26.694	29.3532	58	58	84.1	77.184	0	323.31	41061000000	323
DERPT_G961	Full=Endolysin ame: Full=Gene product 15 Short=gp15 ame: Full=Lysozyme ame: Full=Morphogenesis 2 ame: Full=Muramidase ame: Full= p15 extracellular region,intracellular,lysozyme activity,protein binding,carbohydrate binding,positive regulation of cytokine p	20	4	26.0614	24.4203	26.1361	26.5985	27.0603	29.9106	29.9425	29.0022	28.5732	28.9853	30.2925	32.1276	30.955	29.9289	29.5526	29.978	30.238	29.2858	28.9967	28.8167	28.9198	28.8655	28.2564	28.9039	30	30	62.8	58.648	0	323.31	41053000000	303
DERPT_G3104	Glu2: Full=Beta-1,3-glucan-binding Short=BGBP ame: Full=Beta-1,3-glucan recognition Short= Flags: Precursor hydrolase activity, hydrolyzing O-glycosyl compounds,carbohydrate metabolic process	11	4	NaN	NaN	NaN	NaN	NaN	NaN	NaN	25.1074	29.1261	28.8002	28.2369	28.1029	27.4344	26.0517	27.1717	27.2369	28.2496	25.8567	NaN	NaN	30.3989	30.2677	30.6261	30.1332	15	14	68.6	31.744	0	323.31	41045000000	137
DERPT_G11172	Allergen Homolog (Plo i2, Mala s 13): Full=Thioredoxin Short=Trx extracellular region,nucleus,mitochondrion,cytosol,somatodendritic compartment,neuron projection,protein binding,protein disulfide oxidoreductase activity,peptide disulfide oxidoreductase act	16	4	NaN	NaN	22.9668	NaN	NaN	23.459	22.0758	22.3061	24.8137	29.101	32.8502	32.104	31.1096	28.2764	28.0254	27.6395	25.4884	26.2226	26.3395	25.0638	27.7175	26.176	27.7225	26.1926	15	15	87.7	12.032	0	323.31	40809000000	127
DERPT_G9981	Full=Probable methylmalonate-semialdehyde dehydrogenase [acylating] mitochondrial Short=MMSDH Short=Malonate-semialdehyde dehydrogenase nucleoplasm,mitochondrion,extracellular exosome,fatty-acyl-CoA binding,3-chloroallyl aldehyde dehydrogenase activity,ald	19	4	26.8798	25.3801	27.8875	28.69	30.0436	30.7926	28.0297	25.078	22.2683	NaN	21.6207	23.5989	27.5836	27.8856	26.2263	24.406	24.9921	25.1506	24.0025	24.5052	29.9581	29.4445	29.9833	29.9841	33	33	61.7	58.943	0	323.31	40632000000	259
DERPT_G7727	Proposed Pan-Allergen, Allergen Homolog (Hom sNmSOD, Dro MnSOD, Hev b10, Alt a MnSOD: Full=Superoxide dismutase mitochondrial nucleoid,myelin sheath,extracellular exosome,mitochondrial respiratory chain supercomplex,DNA binding,superoxide dismutase activit	15	4	21.9482	21.5365	23.3369	24.7737	25.7804	27.8412	31.0607	31.0111	28.774	24.549	NaN	NaN	NaN	24.2152	24.8212	23.6595	25.2521	23.8061	NaN	NaN	28.8516	28.3096	29.7066	28.7862	13	13	77.1	25.847	0	323.31	40455000000	155
DERPT_G11279	Full=Proteasome subunit alpha ame: Full=20S proteasome alpha subunit ame: Full=Proteasome core P-body,mitochondrion,polysome,nuclear matrix,proteasome core complex, alpha-subunit complex,sarcomere,proteasome storage granule,nuclear outer membrane-endoplasm	16	4	27.122	32.3747	32.6464	29.8537	25.4845	23.8487	21.4392	20.3773	NaN	22.5385	22.1677	25.4484	24.8911	24.015	23.1765	22.9442	NaN	23.8902	NaN	NaN	27.4019	27.8532	29.3583	28.4839	30	30	97.1	27.228	0	323.31	40106000000	167
DERPT_G11317	Full=L-carnitine dehydrogenase Short=CDH Short=L-CDH nucleolus,Golgi apparatus,cytosol,plasma membrane,extracellular exosome,3-hydroxyacyl-CoA dehydrogenase activity,protein homodimerization activity,L-gulonate 3-dehydrogenase activity,NAD+ binding,carniti	14	4	NaN	NaN	NaN	20.6277	22.9426	25.0923	28.0686	31.5097	30.8951	27.4411	21.2901	20.7915	23.6829	NaN	NaN	22.4467	25.0115	24.2557	24.5735	NaN	29.1859	27.9955	29.8294	28.5664	35	7	81.7	35.579	0	323.31	40059000000	199
DERPT_G7580	Full=Proteasome subunit alpha type-3 nucleus,vacuolar membrane,microtubule associated complex,proteasome core complex, alpha-subunit complex,proteasome storage granule,nuclear outer membrane-endoplasmic reticulum membrane network,apoplast,extracellular exo	9	4	27.4961	30.0625	32.8046	30.1858	26.5835	22.6543	21.034	NaN	NaN	NaN	NaN	NaN	NaN	NaN	NaN	NaN	23.8647	23.4687	NaN	NaN	27.9771	27.4569	28.6264	27.52	34	34	29.5	104.57	0	323.31	39679000000	153
DERPT_G4091	Full=Polypyrimidine tract-binding 3 ame: Full=Regulator of differentiation 1 Short=Rod1 spliceosomal complex,peroxisome,membrane,growth cone,neuronal cell body,DNA binding,mRNA binding,lipid transporter activity,protein binding,oxidoreductase activity, act	20	4	29.8412	28.3816	28.7787	28.6194	28.3081	30.5098	28.4492	26.1755	28.0576	28.7894	25.5004	23.6395	27.4997	29.0648	29.3024	27.5217	26.1449	25.102	25.1143	24.7615	29.0279	29.6424	28.8306	30.0966	127	126	27.4	641.91	0	323.31	39474000000	471
DERPT_G1018	Full=Puromycin-sensitive aminopeptidase Short=PSA ame: Full=Cytosol alanyl aminopeptidase Short=AAP-S mitochondrial proton-transporting ATP synthase complex, coupling factor F(o),nucleus,cytosol,plasma membrane,endomembrane system,vesicle,periplasmic space	10	4	21.0365	NaN	21.9754	22.0154	23.1133	27.3989	30.7783	30.6395	25.438	23.4385	NaN	NaN	24.1025	NaN	NaN	NaN	NaN	NaN	NaN	NaN	29.3588	29.4452	28.8354	29.5414	76	76	75.3	101.5	0	323.31	39379000000	330
DERPT_G579	---NA---	10	4	NaN	23.6225	28.9606	31.9113	29.7175	28.9589	26.6203	27.026	26.849	23.7255	NaN	21.0965	NaN	NaN	NaN	NaN	NaN	NaN	NaN	NaN	28.4101	27.9708	29.7346	27.8405	20	20	53.9	31.563	0	323.31	38517000000	225
DERPT_G1529	Full=Phosphatidylinositol glycan anchor biosynthesis class U ame: Full=Cell division cycle 91-like 1 Short= CDC91-like 1 ame: Full=GPI transamidase component PIG-U nucleoplasm,proteasome core complex, beta-subunit complex,cytosolic ribosome,proteasome stor	8	4	27.4556	30.4449	32.6685	30.2044	27.0904	24.4726	NaN	23.9092	NaN	NaN	NaN	NaN	NaN	NaN	NaN	NaN	22.9605	NaN	NaN	NaN	28.7769	27.4876	29.5108	28.693	22	22	28.5	76.816	0	323.31	38219000000	149
DERPT_G11358	Full=Macrophage migration inhibitory factor Short=MIF ame: Full=L-dopachrome isomerase ame: Full=L-dopachrome tautomerase ame: Full=Phenylpyruvate tautomerase cell part,signaling receptor binding,positive regulation of protein phosphorylation,positive regu	18	4	NaN	NaN	22.8512	21.8879	22.6293	25.5491	29.2076	30.6425	30.6002	29.3272	28.4852	28.8392	31.4264	30.8956	29.2377	28.2088	28.8145	28.8213	29.9054	29.2263	28.7927	27.9673	29.2437	28.1991	14	14	98.4	14.477	0	323.31	38144000000	206
DERPT_G6360	Full=Proteasome subunit beta type-1 ame: Full=Macropain subunit C5 ame: Full=Multicatalytic endopeptidase complex subunit C5 ame: Full=Proteasome component C5 ame: Full=Proteasome gamma chain Flags: Precursor nucleoplasm,endoplasmic reticulum membrane,plas	9	4	26.2359	31.256	32.8759	29.9863	25.5312	23.2724	NaN	NaN	NaN	NaN	NaN	NaN	18.7965	19.6563	NaN	NaN	20.6927	NaN	NaN	NaN	26.4436	26.104	28.9633	26.7615	21	21	86.7	25.996	0	323.31	37885000000	152
DERPT_G10534	Der p 8 Allergen;Allergen homolog (Tyr p 8, Der f8) Full=Glutathione S-transferase Mu 2 ame: Full=GST class-mu 2 ame: Full=GSTM2-2 extracellular region,myelin sheath,membrane-bounded organelle,protein-containing complex,cytoplasmic part,glutathione transf	19	4	25.9855	22.8027	23.8018	23.5412	22.5158	24.3926	24.8195	27.6592	31.1725	28.1562	26.2302	26.9717	26.2914	26.034	26.1156	27.913	28.4415	27.8014	27.3982	NaN	30.3376	28.9313	29.388	29.8832	24	23	97.3	25.642	0	323.31	37618000000	165
DERPT_G11382	Full=Proteasome subunit alpha ame: Full=20S proteasome alpha subunit ame: Full=Proteasome core nucleoplasm,vacuolar membrane,plasma membrane,proteasome core complex, alpha-subunit complex,cytosolic ribosome,proteasome storage granule,nuclear outer membrane	14	4	25.764	31.2135	33	29.8099	25.6606	22.7444	NaN	20.344	NaN	20.6105	20.8462	NaN	21.207	NaN	21.0352	NaN	22.7601	20.4522	NaN	20.7099	26.6804	25.5079	27.2929	27.1478	28	28	83.8	26.428	0	323.31	37457000000	177
DERPT_G4267	Full=Isocitrate dehydrogenase nucleus,lipid droplet,microtubule associated complex,mitochondrial isocitrate dehydrogenase complex (NAD+),chloroplast,myelin sheath,apoplast,magnesium ion binding,isocitrate dehydrogenase (NAD+) activity,protein binding,ATP b	17	4	26.4831	27.5918	30.8686	31.4839	30.1055	27.5185	23.2738	21.9748	22.0981	24.8995	NaN	24.533	24.88	23.9126	22.0125	23.6214	22.5088	NaN	NaN	23.1359	29.3954	28.4943	29.1951	28.8364	35	35	56.9	41.037	0	323.31	36769000000	234
DERPT_G9401	Full=Nicotinate phosphoribosyltransferase Short=NAPRTase ame: Full=Nicotinate phosphoribosyltransferase domain-containing 1 endosome,cytosol,cilium,integral component of membrane,intrinsic component of plasma membrane,sarcolemma,membrane raft,SNARE binding	15	4	NaN	NaN	22.9474	25.2995	28.957	31.3839	30.2756	28.051	27.5467	21.9962	NaN	24.5431	25.5089	25.9276	27.177	26.2066	24.388	25.8636	NaN	NaN	29.1234	28.6366	28.6513	28.6488	43	43	11	478.27	0	323.31	36496000000	224
DERPT_G11928	Proposed Pan-Allergen, Allergen homolog (Aed a8, Tyr p 28, Der f28, Cla h 4, Cor a10): Full=Chaperone ame: Full=HSP70 ame: Full=Heat shock 70 kDa ame: Full=Heat shock 70 nucleolus,lipid droplet,microtubule associated complex,focal adhesion,extracellular ma	15	4	NaN	NaN	23.5842	25.2481	26.1456	27.6944	27.4155	29.1704	31.8766	30.6452	28.1215	25.3399	24.0629	NaN	NaN	23.1173	21.7404	22.2588	NaN	22.9046	27.6324	29.2556	26.4313	28.6565	48	40	60.5	75.984	0	323.31	36381000000	276
DERPT_G3794	Allergen homolog (Gal d GP, Asp fGPI): Full=Glucose-6-phosphate isomerase Short=GPI ame: Full=Phosphoglucose isomerase Short=PGI ame: Full=Phosphohexose isomerase Short=PHI extracellular space,nucleoplasm,lipid droplet,cytosol,neuron projection,myelin shea	10	4	22.9785	NaN	23.9487	26.025	26.8941	27.9672	30.6442	29.7649	26.5192	NaN	NaN	23.5608	24.1765	NaN	NaN	NaN	NaN	NaN	NaN	NaN	29.1768	29.495	28.0967	30.1436	45	45	74.1	66.683	0	323.31	35733000000	271
DERPT_G6323	Full=Alpha-actinin-4 ame: Full=Non-muscle alpha-actinin 4 lipid droplet,brush border,cell-cell junction,adherens junction,microtubule cytoskeleton,lateral plasma membrane,sarcoplasm,cell-substrate junction,axon,midbody,cortical actin cytoskeleton,cell proj	20	4	32.2674	31.4769	31.6249	30.0727	27.9578	26.852	25.0539	25.4467	25.5652	25.0084	25.6145	23.9835	25.3427	24.8271	23.9423	25.3486	24.9612	22.5913	25.1865	25.9691	27.7445	28.9132	29.0108	27.565	231	227	51	507.26	0	323.31	35032000000	854
DERPT_G4999	Allergen Homolog (Tyr p28, Der f28, Pen c19, Cor a10), Proposed Pan-Allergen: Full=Heat shock cognate 71 kDa ame: Full=Heat shock 70 kDa 8 ubiquitin ligase complex,Prp19 complex,photoreceptor inner segment,zona pellucida receptor complex,spliceosomal compl	15	4	NaN	NaN	24.6813	24.414	27.0049	29.1273	30.8853	29.951	30.5144	28.4994	24.937	24.2772	24.5261	24.0267	NaN	NaN	22.9206	23.64	NaN	25.8507	27.5974	29.2627	27.4419	27.9653	53	44	73.1	70.57	0	323.31	34716000000	282
DERPT_G5384	Full=Paired box Pax-6 nuclear chromatin,nucleoplasm,transcription factor complex,mitochondrion,peroxisome,fatty-acyl-CoA binding,RNA polymerase II proximal promoter sequence-specific DNA binding,RNA polymerase II core promoter sequence-specific DNA binding	15	4	24.1748	23.3056	26.0964	28.1233	29.8898	31.4928	30.3907	27.6182	23.9382	23.2661	23.3177	20.5625	NaN	NaN	NaN	24.8849	23.8245	NaN	25.3484	NaN	27.5179	27.0242	28.232	28.214	32	32	41.9	83.616	0	323.31	34546000000	209
DERPT_G8197	Full=Probable proteasome subunit beta type-4 nucleoplasm,vacuolar membrane,endoplasmic reticulum membrane,plasma membrane,proteasome core complex, beta-subunit complex,proteasome storage granule,apoplast,extracellular exosome,threonine-type endopeptidase a	8	4	26.4663	30.7716	32.8056	29.7635	27.0648	23.2211	NaN	NaN	NaN	NaN	NaN	21.3273	23.757	NaN	NaN	NaN	NaN	NaN	NaN	NaN	27.3713	26.3374	27.5872	27.2363	22	22	89.6	25.267	0	323.31	34205000000	137
DERPT_G341	Full=Proteasome subunit beta type-9 ame: Full=Low molecular mass 2 ame: Full=Macropain chain 7 ame: Full=Multicatalytic endopeptidase complex chain 7 ame: Full=Proteasome chain 7 ame: Full=Proteasome subunit beta-1i ame: Full=Really interesting new gene 12	6	4	27.5508	31.0233	32.3809	29.8301	27.2369	23.3799	NaN	NaN	NaN	NaN	NaN	NaN	NaN	NaN	NaN	NaN	NaN	NaN	NaN	NaN	28.4871	28.0297	28.6741	28.2459	21	21	70.9	25.73	0	323.31	34076000000	150
DERPT_G315	Full=Carbonic anhydrase 2 ame: Full=Carbonate dehydratase II ame: Full=Carbonic anhydrase II Short=CA-II mitochondrion,cytosol,plasma membrane,myelin sheath,extracellular region part,carbonate dehydratase activity,metal ion binding,positive regulation of d	17	4	26.0664	26.1934	27.0822	27.7532	26.7512	24.561	22.7143	25.8402	30.448	30.7645	28.3176	25.1804	25.654	25.5834	23.1678	NaN	23.2383	22.9037	NaN	NaN	29.2871	29.159	29.9156	29.2585	23	23	39.3	61.957	0	323.31	34060000000	178
DERPT_G603	Full=Phospholipid hydroperoxide glutathione mitochondrial Short=PHGPx ame: Full=Glutathione peroxidase 4 Short=GPx-4 Short=GSHPx-4 Flags: Precursor nuclear envelope,mitochondrial inner membrane,cytosol,plasma membrane,chloroplast,extracellular exosome,glut	18	4	23.2384	21.6942	21.3256	21.4872	NaN	NaN	20.7341	21.016	24.3871	31.3696	31.6622	29.0682	26.7813	25.9138	24.1258	22.2685	23.6493	21.9535	21.9838	21.9813	29.3604	28.9586	27.7724	29.5895	27	27	68.3	26.341	0	323.31	33973000000	150
DERPT_G7543	Full=NADP-dependent malic enzyme Short=NADP-ME cell wall,mitochondrion,vacuolar membrane,cytosol,plasma membrane,plasmodesma,chloroplast,apoplast,malate dehydrogenase (decarboxylating) (NAD+) activity,malate dehydrogenase (decarboxylating) (NADP+) activity	10	4	NaN	NaN	19.6503	18.7959	22.048	30.4893	30.9933	27.2924	20.8814	NaN	NaN	NaN	NaN	17.9232	18.3709	NaN	NaN	22.7452	NaN	NaN	27.996	28.885	29.3907	29.3494	44	44	54.5	86.975	0	323.31	33267000000	258
DERPT_G3666	Full=Sodium potassium-transporting ATPase subunit alpha-1 Short=Na(+) K(+) ATPase alpha-1 subunit ame: Full=Sodium pump subunit alpha-1 Flags: Precursor nucleus,endosome,endoplasmic reticulum,Golgi apparatus,cytosol,sodium:potassium-exchanging ATPase compl	16	4	28.599	22.6651	23.8114	NaN	25.0897	NaN	NaN	NaN	24.1881	25.5284	29.3837	30.9271	31.0726	30.1266	28.172	28.1398	27.6258	27.1394	27.1844	26.5352	29.5396	29.9625	27.9415	30.24	45	36	48.7	112.63	0	323.31	33257000000	280
DERPT_G10880	Full=Aspartate mitochondrial Short=m ame: Full=Fatty acid-binding Short=FABP-1 ame: Full=Glutamate oxaloacetate transaminase 2 ame: Full=Kynurenine aminotransferase 4 ame: Full=Kynurenine aminotransferase IV ame: Full=Kynurenine--oxoglutarate transaminase	13	4	24.498	NaN	21.8913	NaN	NaN	24.1362	29.3359	30.6552	28.8988	NaN	NaN	NaN	23.4995	24.9026	26.5746	22.4842	26.1864	22.3691	NaN	24.8776	29.6469	29.3843	27.4748	29.8755	34	34	30.7	123.66	0	323.31	33209000000	177
DERPT_G9373	Full=Glycogen muscle form ame: Full=Myophosphorylase plasma membrane,sarcoplasmic reticulum,Z disc,axon,protein-containing complex,extracellular exosome,purine nucleobase binding,ATP binding,drug binding,glycogen phosphorylase activity,AMP binding,vitamin	12	4	26.3395	25.1747	25.5582	26.1869	26.3232	29.615	27.7291	24.3997	23.4102	NaN	NaN	NaN	27.0133	25.5117	25.1316	NaN	NaN	NaN	NaN	NaN	29.7056	30.0856	28.1469	29.83	69	69	73.1	100.96	0	323.31	32930000000	279
DERPT_G8448	Full=Homogentisate 1,2-dioxygenase Short=HGDO ame: Full=Homogentisate oxygenase ame: Full=Homogentisic acid oxidase ame: Full=Homogentisicase cytosol,striated muscle dense body,extracellular exosome,homogentisate 1,2-dioxygenase activity,identical protein	13	4	21.4896	22.4288	27.4137	29.1942	30.5966	30.9931	30.3231	26.4379	22.7468	NaN	NaN	NaN	NaN	NaN	NaN	NaN	24.8252	26.2158	23.9811	23.5076	28.4005	28.3501	29.1245	27.6814	33	33	87.6	49.787	0	323.31	32833000000	229
DERPT_G7893	Full=Fumarate mitochondrial Short=Fumarase Flags: Precursor mitochondrial matrix,cytosol,tricarboxylic acid cycle enzyme complex,extracellular exosome,fumarate hydratase activity,protein binding,fumarate metabolic process,malate metabolic process,response	14	4	21.6223	NaN	20.9048	NaN	25.3259	31.2866	29.6653	23.7033	NaN	22.4273	22.5443	23.99	24.0916	22.5147	21.8421	24.1514	24.2547	NaN	NaN	NaN	29.2743	29.386	26.9147	29.344	35	35	67.9	59.722	0	323.31	32315000000	181
DERPT_G3628	Full=Glutamyl aminopeptidase Short=EAP ame: Full=Aminopeptidase A Short=AP-A ame: CD_antigen=CD249 endomembrane system,organelle membrane,cytoplasmic vesicle,intracellular membrane-bounded organelle,organelle lumen,intracellular organelle part,plasma membr	17	4	30.7968	29.6612	32.0512	29.1176	24.8574	24.8107	23.3134	20.5991	20.675	22.092	21.7467	23.3332	23.7585	22.4889	24.7647	24.1971	24.721	NaN	NaN	NaN	29.1842	29.4829	29.7076	28.9853	190	190	46.6	530.08	0	323.31	32309000000	708
DERPT_G4146	Full=Probable acetyl- acyltransferase ame: Full=Acetoacetyl- thiolase mitochondrial inner membrane,mitochondrial matrix,extracellular exosome,acetyl-CoA C-acyltransferase activity,acetyl-CoA metabolic process,fatty acid beta-oxidation,cellular response to	17	4	27.7679	25.1164	26.1511	25.987	24.6231	25.1982	25.3747	24.0879	21.9389	NaN	NaN	24.2481	26.0718	26.5381	25.0594	23.0868	24.5321	23.8214	NaN	24.7767	30.1993	29.9048	30.5395	29.8696	31	31	83.5	42.077	0	323.31	32241000000	211
DERPT_G4930	Full=Tubulin beta-1 chain ame: Full=Beta-1-tubulin nucleus,cytosol,axonemal microtubule,axon,dendrite,extracellular matrix,neuronal cell body,myelin sheath,tubulin complex,extracellular exosome,double-stranded RNA binding,GTPase activity,structural constit	16	4	30.0963	28.0933	27.2549	27.7986	27.5929	28.3567	27.7529	26.1767	25.5185	25.4851	27.2871	26.9027	28.6033	28.0331	27.4685	NaN	27.5907	NaN	NaN	NaN	29.3873	30.2621	28.5606	29.7795	32	17	74.2	50.086	0	323.31	31936000000	245
DERPT_G3272	Full=3-hydroxyisobutyryl- mitochondrial ame: Full=3-hydroxyisobutyryl-coenzyme A hydrolase Short=HIB- hydrolase Short=HIBYL- -H Flags: Precursor mitochondrion,cytosol,membrane,3-hydroxyisobutyryl-CoA hydrolase activity,valine catabolic process,response to	7	4	NaN	NaN	NaN	NaN	NaN	NaN	NaN	24.9827	31.012	29.0287	26.2564	22.0346	23.1016	22.3247	NaN	NaN	NaN	NaN	NaN	NaN	29.6322	29.4951	30.0434	29.1588	27	27	67.4	44.378	0	323.31	31895000000	148
DERPT_G10848	Full=Uncharacterized serine carboxypeptidase Flags: Precursor mitochondrion,vacuole,membrane,extracellular region part,serine-type carboxypeptidase activity,protein binding,proteolysis,regulation of protein stability,biological_process,negative regulation	11	4	NaN	NaN	24.0251	24.4546	25.8181	30.6413	30.5028	28.1695	25.4665	24.5869	NaN	22.9054	NaN	NaN	NaN	21.2091	21.6081	NaN	NaN	NaN	28.7233	28.2742	29.6173	28.6323	26	26	54.9	53.055	0	323.31	31881000000	163
DERPT_G9292	Full=Probable enoyl- hydratase echA8 mitochondrial matrix,cell periphery,mRNA 3-UTR binding,enoyl-CoA hydratase activity,methylglutaconyl-CoA hydratase activity,nuclear-transcribed mRNA catabolic process, deadenylation-dependent decay,fatty acid beta-oxid	13	4	30.3355	28.1904	29.0485	30.1554	29.6405	29.8287	27.5911	25.0373	25.6526	NaN	NaN	22.9765	26.4082	26.3961	25.0774	NaN	NaN	NaN	NaN	NaN	29.4409	29.0111	29.7257	29.6196	82	82	41	274.34	0	323.31	31874000000	408
DERPT_G11210	Full=Adenosine kinase Short=AK ame: Full=Adenosine 5 -phosphotransferase nucleoplasm,cytosol,plasma membrane,adenosine kinase activity,copper ion binding,carbohydrate kinase activity,organic cyclic compound binding,heterocyclic compound binding,purine nucl	19	4	22.8366	23.1116	25.0752	25.7083	26.3603	27.5563	28.1643	28.1265	30.3969	29.8105	26.0574	23.7129	24.0825	22.8909	24.7389	24.7252	23.5753	24.1213	NaN	23.2681	29.3198	29.1088	29.9488	28.8884	31	31	82.3	38.918	0	323.31	31619000000	193
DERPT_G11081	Full=Acetylcholinesterase Short=A Flags: Precursor nuclear envelope,endoplasmic reticulum,plasma membrane,extracellular region part,synapse,intracellular organelle lumen,neuron part,cholinesterase activity,protein binding,response to organonitrogen compoun	9	4	23.772	23.4804	25.7051	30.6714	30.6374	29.609	25.2293	21.4487	NaN	NaN	NaN	NaN	NaN	NaN	21.7614	NaN	NaN	NaN	NaN	NaN	28.5037	29.0605	29.617	28.2788	30	30	46.1	78.703	0	323.31	31575000000	185
DERPT_G8708	CG9896	20	4	23.8264	23.1336	25.4659	24.3661	23.8082	23.69	23.5543	27.003	30.0519	30.2114	29.2699	29.7003	29.3538	29.4692	29.0211	28.1139	28.554	29.1537	28.1969	23.4801	28.5723	27.8465	30.058	28.212	28	28	77.4	29.308	0	323.31	31021000000	234
DERPT_G716	Full=Cathepsin K Flags: Precursor extracellular space,nucleolus,microvillus,external side of plasma membrane,secretory granule,neuron projection,lysosomal lumen,perikaryon,fusome,apical part of cell,extracellular exosome,aminopeptidase activity,cysteine-ty	20	4	21.2346	20.8654	25.0708	28.1642	28.4637	27.8495	28.7034	30.0808	30.5597	30.1147	26.6632	23.6742	23.1506	23.9174	22.4824	24.6114	25.119	24.9232	22.4026	23.1719	28.374	27.7892	28.4127	28.2263	27	27	55.9	38.552	0	323.31	30693000000	211
DERPT_G9601	Full=14-3-3 epsilon Short=14-3-3E chromosome,mitochondrion,centrosome,kinesin complex,plasma membrane,cell-cell adherens junction,focal adhesion,cell surface,cytoplasmic stress granule,axon,yeast-form cell wall,melanosome,germline ring canal,extracellular	19	4	25.0677	23.0626	24.865	24.9367	25.884	28.313	31.4778	30.6623	27.7131	24.0639	23.2873	NaN	22.3623	24.0141	21.8732	25.843	26.6747	26.9655	28.092	26.6255	27.9618	27.0514	27.1605	26.62	33	31	13.6	256.31	0	323.31	30483000000	175
DERPT_G1317	Full=Glucosylceramidase ame: Full=Acid beta-glucosidase ame: Full=Beta-glucocerebrosidase ame: Full=D-glucosyl-N-acylsphingosine glucohydrolase Flags: Precursor extracellular space,lysosomal membrane,lysosomal lumen,glucosylceramidase activity,protein kina	12	4	NaN	NaN	20.9896	22.0311	22.7916	22.3195	23.9108	28.9389	30.746	26.8595	22.1527	21.8829	NaN	NaN	NaN	NaN	23.1061	24.5867	NaN	NaN	29.3393	28.8328	29.8669	28.8635	45	45	26	167.85	0	323.31	30157000000	236
DERPT_G3363	Full=Transmembrane 9 superfamily member 4 Flags: Precursor nucleus,vacuolar membrane,trans-Golgi network,cytosol,plasma membrane,plant-type cell wall,plasmodesma,endosome membrane,integral component of membrane,extracellular exosome,fructose 1,6-bisphospha	18	4	26.6099	25.5788	26.6366	27.4765	27.3181	28.5285	28.8336	27.8301	28.037	26.4452	23.666	NaN	25.4711	26.8146	25.6148	25.0917	25.0842	25.2127	24.8187	NaN	29.5038	29.1763	30.0287	29.3911	22	22	23.9	111.08	0	323.31	30083000000	201
DERPT_G873	Full=Filamin-A Short=FLN-A ame: Full=Actin-binding 280 Short=ABP-280 ame: Full=Alpha-filamin ame: Full=Endothelial actin-binding ame: Full=Filamin-1 ame: Full=Non-muscle filamin stress fiber,nucleolus,endoplasmic reticulum lumen,trans-Golgi network,cytosol	17	4	NaN	23.6847	25.9573	28.9448	29.8142	28.9371	28.9446	28.1085	27.0858	28.0289	29.0812	28.246	24.587	25.3772	24.2631	24.0741	23.019	22.7405	NaN	NaN	29.0444	29.036	26.732	29.0529	58	58	50.9	137.17	0	323.31	30073000000	354
DERPT_G9539	Full=Proteasome subunit alpha ame: Full=20S proteasome alpha subunit ame: Full=Proteasome core P-body,nucleus,chloroplast,proteasome core complex, alpha-subunit complex,proteasome storage granule,nuclear outer membrane-endoplasmic reticulum membrane networ	6	4	26.387	29.5063	32.4599	29.0777	24.8366	NaN	NaN	23.3192	NaN	NaN	NaN	NaN	NaN	NaN	NaN	NaN	NaN	NaN	NaN	NaN	27.9363	27.786	28.173	28.1219	18	18	74.4	25.954	0	323.31	30010000000	154
DERPT_G842	Full=Medium-chain specific acyl- mitochondrial Short=MCAD Flags: Precursor cell wall,nucleus,mitochondrial matrix,peroxisome,lipid droplet,cytosol,microtubule associated complex,plasma membrane,axon,mitochondrial membrane,extracellular exosome,fatty-acyl-C	17	4	24.9616	21.9355	24.8966	25.1818	28.7019	30.6001	27.0729	22.208	21.3604	22.4628	22.2663	24.2149	26.5656	25.2642	24.4461	22.057	22.1346	NaN	NaN	NaN	29.5864	29.9124	28.311	29.7703	32	26	77.7	46.874	0	323.31	29958000000	184
DERPT_G160	Full=Papilin Flags: Precursor extracellular matrix,extracellular matrix component,cell part,metalloendopeptidase activity,serine-type endopeptidase inhibitor activity,protein binding,chitin binding,zinc ion binding,reproduction,chitin metabolic process,pro	17	4	24.3354	28.9396	30.6944	27.9866	27.3328	27.7781	28.1413	28.5254	28.9088	29.5666	28.9224	29.2833	28.7405	28.9064	27.7241	26.314	25.9399	NaN	NaN	NaN	28.2856	27.8226	28.6519	27.9217	84	84	31.7	330.13	0	323.31	29568000000	387
DERPT_G9250	---NA---	20	4	27.2148	26.3056	26.3486	25.4957	25.9524	26.5651	27.397	28.9392	30.8339	30.169	28.9957	29.4089	28.2278	28.2086	28.9408	29.9383	29.2681	28.9756	27.2532	27.3459	27.849	27.6964	28.2602	27.3448	19	19	41.4	55.092	0	323.31	29341000000	173
DERPT_G4277	Full=Cathepsin L1 ame: Full=Cathepsin L Contains: ame: Full=Cathepsin L1 heavy chain Contains: ame: Full=Cathepsin L1 light chain Flags: Precursor extracellular space,nucleolus,cell surface,membrane,cytoplasmic vesicle,cell projection,lysosomal lumen,fusom	18	4	20.8576	21.049	22.7731	22.9403	24.1306	26.2494	28.0646	29.9535	30.61	29.0402	24.1899	22.8768	22.268	23.555	25.1603	23.4506	21.6778	21.3133	NaN	NaN	28.9111	28.2749	29.3678	29.02	27	27	37.8	66.9	0	323.31	28918000000	196
DERPT_G4150	Full=Transitional endoplasmic reticulum ATPase Short=TER ATPase ame: Full=15S Mg(2+)-ATPase p97 subunit ame: Full=Valosin-containing Short=VCP proteasome complex,Doa10p ubiquitin ligase complex,Hrd1p ubiquitin ligase ERAD-L complex,cell wall,nucleoplasm,nu	20	4	27.6893	29.4874	31.5756	30.2643	25.946	25.1911	23.9444	23.9352	27.2525	28.3173	26.3667	26.1401	26.8055	24.9971	24.5631	26.2319	26.4387	24.3356	24.5799	25.5721	28.8203	29.1785	27.8688	29.5099	66	65	70.7	99.73	0	323.31	28868000000	335
DERPT_G7048	Full=Fasciclin-1 ame: Full=Fasciclin I Short=FAS I Short=FCN Flags: Precursor	11	4	27.1717	27.261	27.9641	28.8063	26.6188	27.3212	30.2913	29.9973	27.6472	25.6024	24.0397	NaN	NaN	NaN	NaN	NaN	NaN	NaN	NaN	NaN	28.2932	28.4443	29.0847	28.425	42	42	51.3	90.519	0	323.31	28848000000	249
DERPT_G1370	Full=ATP synthase subunit mitochondrial ame: Full=F-ATPase gamma subunit Flags: Precursor cell wall,nucleolus,mitochondrial proton-transporting ATP synthase, central stalk,mitochondrial matrix,lipid droplet,chloroplast,myelin sheath,extracellular exosome,p	12	4	25.6237	20.2838	27.954	31.5441	29.7378	26.0995	22.3497	20.7146	20.4713	NaN	23.222	NaN	23.6717	NaN	NaN	NaN	NaN	22.5295	NaN	NaN	28.4342	27.5825	29.2105	28.4522	28	28	73.4	36.109	0	323.31	28565000000	185
DERPT_G3352	Full=Beta-hexosaminidase subunit alpha ame: Full=Beta-N-acetylhexosaminidase subunit alpha Short=Hexosaminidase subunit A ame: Full=N-acetyl-beta-glucosaminidase subunit alpha Flags: Precursor acrosomal vesicle,extracellular space,cell wall,lysosome,membra	7	4	NaN	NaN	24.0573	24.6051	26.6698	30.3295	30.2283	28.9833	27.0448	NaN	NaN	NaN	NaN	NaN	NaN	NaN	NaN	NaN	NaN	NaN	28.591	28.4962	28.9902	28.8958	30	30	34	107.85	0	323.31	28325000000	182
DERPT_G7218	Full=Glycerol-3-phosphate dehydrogenase mitochondrion,cytosol,plasma membrane,glycerol-3-phosphate dehydrogenase complex,extracellular exosome,glycerol-3-phosphate dehydrogenase [NAD+] activity,glycerol-3-phosphate dehydrogenase (quinone) activity,sodium c	11	4	24.4586	22.5914	25.168	26.3313	26.0049	27.6826	29.6765	30.3128	28.1012	23.6504	NaN	NaN	22.9094	NaN	NaN	NaN	NaN	NaN	NaN	NaN	28.8207	28.9392	28.6581	28.6378	28	28	66.6	44.521	0	323.31	27895000000	193
DERPT_G8830	Full=Ferritin heavy chain Short=Ferritin H subunit Contains: ame: Full=Ferritin heavy N-terminally processed insulin receptor binding,ferric iron binding,iron ion transport,cellular iron ion homeostasis,insulin receptor complex,signal transduction	10	4	25.7585	27.3736	31.286	31.3112	28.8441	25.9998	22.8549	22.1568	NaN	NaN	NaN	NaN	NaN	NaN	NaN	23.2839	23.1509	NaN	NaN	NaN	27.2753	26.514	27.6415	26.991	14	14	33	47.483	0	323.31	27780000000	122
DERPT_G10227	Proposed StenAllergen: Full=Transaldolase nucleus,cytosol,extracellular exosome,sedoheptulose-7-phosphate:D-glyceraldehyde-3-phosphate glyceronetransferase activity,monosaccharide binding,chronological cell aging,carbohydrate metabolic process,fructose 6-p	9	4	NaN	NaN	25.0766	26.209	27.0457	28.3734	30.2083	30.543	27.472	23.9079	NaN	24.3145	NaN	NaN	NaN	NaN	NaN	NaN	NaN	NaN	28.5238	27.7841	28.7926	28.7806	24	24	64.1	36.959	0	323.31	27687000000	160
DERPT_G6409	Allergen Homolog (Hev b HSP80, Asp f12): Full=Heat shock HSP 90-alpha polytene chromosome interband,mitochondrion,lysosomal membrane,lipid droplet,centrosome,cytosol,cell-cell adherens junction,COP9 signalosome,cell surface,inclusion body,basolateral plasm	17	4	27.2968	23.0059	25.69	25.7817	26.5636	28.0813	28.58	29.5401	29.716	26.9605	26.1407	27.8879	26.9084	27.5023	NaN	23.51	24.7776	NaN	26.1756	NaN	28.9047	29.1973	27.9298	29.5257	60	46	64.2	83.479	0	323.31	27606000000	316
DERPT_G10010	Full=Proteasome subunit alpha ame: Full=20S proteasome alpha subunit ame: Full=Proteasome core P-body,male germ cell nucleus,vacuole,microtubule associated complex,proteasome core complex, alpha-subunit complex,cytosolic ribosome,proteasome storage granule	6	4	24.0777	29.0228	32.3971	28.9909	24.2371	NaN	NaN	NaN	NaN	NaN	NaN	NaN	NaN	NaN	22.5321	NaN	NaN	NaN	NaN	NaN	28.1357	27.1393	27.9426	27.7589	29	29	77.6	31.324	0	323.31	27366000000	153
DERPT_G6881	Full=Proteasome subunit beta 2 ame: Full=20S proteasome beta subunit 2 ame: Full=Proteasome core 2 Flags: Precursor nucleoplasm,endoplasmic reticulum membrane,proteasome core complex, beta-subunit complex,proteasome storage granule,extracellular exosome,sp	11	4	25.9751	29.7278	32.3812	29.953	25.9505	NaN	NaN	NaN	23.6759	24.0581	NaN	NaN	23.7829	25.0428	NaN	NaN	22.4234	NaN	NaN	23.36	27.5891	27.1156	28.4642	27.7544	19	19	64	30.254	0	323.31	27357000000	133
DERPT_G8971	Full=Cytochrome b-c1 complex subunit mitochondrial ame: Full=Complex III subunit 1 ame: Full=Core I ame: Full=Ubiquinol-cytochrome-c reductase complex core 1 Flags: Precursor cell wall,nucleolus,mitochondrial outer membrane,mitochondrial respiratory chain	19	4	28.4567	22.6819	24.4074	24.2995	24.7818	26.1988	27.0918	28.7699	29.5208	26.9827	25.2613	26.1728	28.9705	29.4526	27.9748	25.9684	24.7186	NaN	23.9949	24.2215	29.2601	29.279	27.0036	29.5922	33	33	85.1	52.737	0	323.31	27166000000	221
DERPT_G9084	Full=Serine cytosolic Short=SHMT ame: Full=Glycine hydroxymethyltransferase ame: Full=Serine methylase mitochondrial respiratory chain complex I,plasma membrane,chloroplast thylakoid,chloroplast stroma,stromule,cytosolic ribosome,mitochondrial nucleoid,apo	15	4	26.8392	NaN	26.4888	27.4184	24.8543	26.2464	28.8238	26.8476	24.9819	23.8574	27.8845	27.5382	29.0828	27.862	25.8526	NaN	24.5616	NaN	NaN	NaN	28.8576	30.44	27.9487	29.5604	37	37	72.6	59.805	0	323.31	27146000000	202
DERPT_G7260	Der p5 Allergen;Allergen Homolog (Der f5): Full=Mite allergen Der p 5 ame: Full=Allergen Der P V ame: Full= -binding allergen ame: Allergen=Der p 5	16	4	NaN	NaN	23.3913	21.715	20.8009	21.8104	23.075	28.1568	30.7159	29.7917	29.2605	28.9758	28.8273	27.7218	28.0389	26.7549	24.6083	24.1608	NaN	NaN	28.8784	28.8499	29.393	28.2476	14	14	25.5	36.176	0	323.31	26661000000	188
DERPT_G11308	--NA--	10	4	NaN	NaN	NaN	NaN	NaN	23.5512	25.619	28.0503	30.5056	29.5151	28.6897	25.8583	25.6059	24.0418	23.9702	NaN	NaN	NaN	NaN	NaN	29.2669	27.9386	30.1402	27.6244	73	73	32.8	291.47	0	323.31	26616000000	265
DERPT_G6340	Full=Adenylosuccinate lyase Short=ASL ame: Full=Adenylosuccinase Short=ASase mitochondrion,cytosol,N6-(1,2-dicarboxyethyl)AMP AMP-lyase (fumarate-forming) activity,(S)-2-(5-amino-1-(5-phospho-D-ribosyl)imidazole-4-carboxamido)succinate AMP-lyase (fumarate-	16	4	28.9245	26.181	26.4874	28.1061	28.4112	29.9676	26.7154	23.3215	21.8852	NaN	NaN	NaN	25.0863	25.5176	25.5915	23.0376	24.8874	NaN	24.3323	25.3984	29.1232	29.0214	29.6024	29.0816	44	44	75.4	55.027	0	323.31	26590000000	268
DERPT_G4977	Full=Low-density lipo receptor-related 2 Short=LRP-2 ame: Full=Glyco 330 Short=gp330 ame: Full=Megalin Flags: Precursor extracellular matrix,mitochondrion,early endosome,caveola,somatodendritic compartment,cell projection,receptor complex,synapse part,plas	20	4	31.1781	30.4935	30.1059	27.1504	27.6181	29.2058	29.6372	27.9982	27.7845	26.9378	24.6242	25.1403	23.8792	21.6774	25.728	26.3398	26.8156	26.4312	27.2975	28.0211	28.291	28.9203	27.6261	28.4397	61	61	51.1	151.95	0	323.31	26391000000	370
DERPT_G4900	---NA---	13	4	NaN	NaN	24.5428	25.3273	25.4743	27.8054	29.8407	30.5525	30.2001	27.0362	25.4953	24.1489	27.2169	27.3269	27.6213	NaN	NaN	NaN	NaN	NaN	27.8339	26.2701	28.2243	26.1896	5	5	61.4	11.273	0	323.31	26124000000	84
DERPT_G577	---NA---	10	4	NaN	NaN	28.1087	31.7937	30.3673	28.5983	27.6461	27.0206	26.6826	26.133	23.4357	NaN	22.6966	NaN	NaN	NaN	NaN	NaN	NaN	NaN	24.2802	24.4427	25.3372	24.2872	15	15	63.3	23.75	0	323.31	25902000000	95
DERPT_G6148	Full=Formyl- :oxalate -transferase Short=FCOCT ame: Full=Formyl-coenzyme A transferase Short=Formyl- transferase mitochondrion,peroxisome,alpha-methylacyl-CoA racemase activity,bile acid metabolic process,isoprenoid catabolic process	7	4	NaN	NaN	21.8323	23.8281	25.8082	27.9142	30.7037	29.9432	26.8778	NaN	NaN	NaN	NaN	NaN	NaN	NaN	NaN	NaN	NaN	NaN	28.3391	27.9457	28.9121	27.9256	33	33	81.8	42.72	0	323.31	25822000000	192
DERPT_G10381	Full=N-acetylmuramoyl-L-alanine amidase ame: Full=Peptidoglycan recognition 2 ame: Full=Peptidoglycan recognition long Short=PGRP-L Flags: Precursor	10	4	29.1227	28.6585	30.1062	30.3968	28.2377	26.9242	28.2792	28.1309	26.3514	24.133	NaN	NaN	NaN	NaN	NaN	NaN	NaN	NaN	NaN	NaN	28.4148	28.6874	28.4895	28.666	47	47	51	94.438	0	323.31	25617000000	252
DERPT_G10112	Full=3-oxoacyl- endoplasmic reticulum,Golgi apparatus,integral component of membrane,intracellular organelle part,CMP-N-acetylneuraminate transmembrane transporter activity,GDP-fucose transmembrane transporter activity,GDP-mannose transmembrane transporter	12	4	22.8854	NaN	24.5065	23.0101	24.7992	27.1394	30.7543	29.7561	25.9817	NaN	NaN	NaN	NaN	NaN	NaN	NaN	24.1978	23.7476	25.6679	22.7269	28.6338	28.2307	28.7244	28.6726	23	23	34.5	75.331	0	323.31	25248000000	128
DERPT_G7070	Full=Biotinidase Short=Biotinase Flags: Precursor extracellular region,membrane,cell part,hydrolase activity, acting on carbon-nitrogen (but not peptide) bonds, in linear amides,nitrogen compound metabolic process,inflammatory response,cellular process	18	4	21.128	NaN	21.4837	20.6293	22.4914	25.578	28.5091	30.7083	29.6019	26.5233	21.7942	21.8447	21.9557	NaN	21.9804	21.2557	22.5695	24.0694	24.2346	22.1008	28.5134	28.3566	29.2477	28.196	32	32	60.6	61.307	0	323.31	24888000000	185
DERPT_G11214	Full=Acetylcholinesterase Short=A Flags: Precursor nuclear envelope,endoplasmic reticulum,plasma membrane,extracellular region part,membrane part,synapse,intracellular organelle lumen,neuron part,cholinesterase activity,protein binding,nervous system devel	6	4	NaN	NaN	NaN	NaN	22.3342	23.3415	28.2628	30.1229	29.9513	26.2136	NaN	NaN	NaN	NaN	NaN	NaN	NaN	NaN	NaN	NaN	28.6753	28.2603	28.948	28.1222	29	28	56	62.146	0	323.31	24858000000	157
DERPT_G3512	Full=Acyl- synthetase family member mitochondrial Flags: Precursor intracellular membrane-bounded organelle,cytoplasmic part,CoA-ligase activity,acid-thiol ligase activity,lipid metabolic process,monocarboxylic acid metabolic process	7	4	NaN	NaN	20.4331	21.4887	21.0126	29.3419	30.4472	26.0479	22.0422	NaN	NaN	NaN	NaN	NaN	NaN	NaN	NaN	NaN	NaN	NaN	29.2271	28.6591	28.965	29.0244	38	37	73.6	71.161	0	323.31	24498000000	199
DERPT_G10228	Full=Probable glutamate receptor ame: Full=Kainate-binding Flags: Precursor membrane,ionotropic glutamate receptor activity,extracellularly glutamate-gated ion channel activity,ion transport,signal transduction,chemical synaptic transmission	18	4	27.1429	26.824	27.6364	28.573	28.4187	25.7529	25.5738	28.3239	31.0185	30.3513	27.6359	24.7191	25.6492	23.9648	NaN	23.2707	24.366	24.635	23.7394	NaN	26.9573	26.5596	27.7567	26.694	17	17	52	40.127	0	323.31	23790000000	186
DERPT_G9187	Der f6 like allergen;Allergen Homolog (Blo t6)Full=Trypsin epsilon Flags: Precursor membrane,cell part,serine-type endopeptidase activity,Rho guanyl-nucleotide exchange factor activity,protein binding,proteolysis,regulation of Rho protein signal transduct	14	4	23.5231	NaN	24.4415	23.9171	NaN	24.3131	26.1103	28.2627	29.6827	29.1003	26.995	24.796	25.1094	25.161	NaN	22.1052	22.225	NaN	NaN	NaN	29.0594	29.2259	28.8564	28.8013	32	32	17.9	228.11	0	323.31	23765000000	192
DERPT_G3451	Full=Angiotensin-converting enzyme Short=ACE ame: Full=Dipeptidyl carboxypeptidase I ame: Full=Kininase II ame: CD_antigen=CD143 Contains: ame: Full=Angiotensin-converting soluble form Flags: Precursor extracellular space,basal plasma membrane,brush border	10	4	24.9786	25.0026	26.8695	27.7568	27.4654	31.097	28.7471	26.4953	22.2711	NaN	NaN	NaN	NaN	NaN	23.1838	NaN	NaN	NaN	NaN	NaN	28.3026	27.6707	28.5932	28.0473	61	61	60	123.98	0	323.31	23448000000	238
DERPT_G3234	Full=Staphylococcal nuclease domain-containing 1 ame: Full=100 kDa coactivator ame: Full=p100 co-activator nucleus,mitochondrion,endomembrane system,membrane,RISC complex,cytoplasmic vesicle,P granule,extracellular exosome,dense body,RNA binding,protein ki	12	4	20.448	NaN	NaN	NaN	NaN	NaN	22.4433	26.5747	31.09	30.1208	26.8764	24.1216	22.6333	23.9256	23.4545	NaN	21.7144	21.8284	NaN	NaN	28.5615	28.0508	28.4294	28.9597	53	53	57.5	101.21	0	323.31	23416000000	227
DERPT_G7487	Full=6-phosphogluconate decarboxylating nucleus,mitochondrion,cytosol,plasma membrane,extracellular exosome,phosphogluconate dehydrogenase (decarboxylating) activity,phosphogluconate 2-dehydrogenase activity,carbohydrate binding,carboxylic acid binding,NAD	16	4	26.5961	24.0573	25.9153	25.9661	26.5841	27.8704	27.9494	28.6818	27.4303	25.9693	23.6775	22.3021	24.0664	27.0382	28.281	27.1314	NaN	NaN	NaN	NaN	28.8097	29.2467	26.5697	29.3136	36	36	85.3	53.811	0	323.31	23280000000	224
DERPT_G8776	Full=Alpha-actinin-4 ame: Full=Non-muscle alpha-actinin 4 stress fiber,nucleolus,lipid droplet,cytosol,cell-cell adherens junction,spectrin,postsynaptic density,spectrin-associated cytoskeleton,apicolateral plasma membrane,lateral plasma membrane,nuclear m	15	4	26.2617	25.6868	27.7387	27.9503	27.6566	26.2868	25.7293	27.1395	28.3985	29.4992	30.1328	29.1635	28.3706	25.8865	24.4136	NaN	NaN	NaN	NaN	NaN	28.3016	28.8866	27.9082	28.185	129	129	57.1	273.08	0	323.31	23002000000	491
DERPT_G502	Full=Aldose reductase Short=AR ame: Full=Aldehyde reductase mitochondrial matrix,lysosome,cytosol,apical plasma membrane,cell projection,extracellular exosome,retinal dehydrogenase activity,alditol:NADP+ 1-oxidoreductase activity,estradiol 17-beta-dehydrog	16	4	23.7091	NaN	23.0907	23.19	22.2659	22.7919	25.3816	26.2815	30.2924	30.6133	28.0316	27.1327	27.1294	27.1247	24.7594	NaN	24.5934	24.5958	NaN	NaN	28.6989	27.6225	28.082	28.9912	26	26	31.7	96.248	0	323.31	22625000000	156
DERPT_G9704	---NA---	17	4	29.9513	30.3305	30.7444	29.2317	28.9451	28.3333	27.2874	25.549	27.0994	28.6147	27.5789	26.0117	24.6538	25.5046	24.6291	23.4769	27.133	NaN	NaN	NaN	27.4141	27.7212	27.4436	27.8372	26	26	37.6	109.03	0	323.31	22427000000	180
DERPT_G4145	Full=Vinculin ame: Full=Metavinculin stress fiber,podosome,mitochondrial inner membrane,brush border,zonula adherens,fascia adherens,focal adhesion,muscle tendon junction,Z disc,smooth muscle dense body,neuromuscular junction,sarcolemma,cell projection,cos	17	4	25.4932	23.2963	24.9203	26.3231	26.8904	29.1831	30.0532	29.8899	29.4161	27.4813	25.6981	24.5851	24.9223	24.7651	21.7942	NaN	23.482	24.3382	NaN	NaN	27.1057	27.5153	27.7215	27.17	57	57	57.3	113.69	0	323.31	22343000000	296
DERPT_G7100	Der p9 Allergen: Full=Trypsin theta Flags: Precursor serine-type endopeptidase activity,proteolysis	16	4	27.3988	27.9107	29.5071	28.8138	28.8094	26.9408	23.5693	26.7323	27.6431	25.4507	25.607	27.3211	23.486	NaN	24.8437	NaN	NaN	NaN	24.9776	24.8336	29.0673	28.8633	29.5691	28.0832	16	16	85.3	29.352	0	323.31	22307000000	162
DERPT_G10374	Full=Ribose-phosphate pyrophosphokinase 2 ame: Full=Phosphoribosyl pyrophosphate synthase II Short=PRS-II ribose phosphate diphosphokinase complex,nucleus,endoplasmic reticulum membrane,proteasome core complex, beta-subunit complex,proteasome storage granu	20	4	27.4444	25.5601	26.3248	26.3275	26.1901	27.6301	28.2636	28.8027	28.9731	27.3757	24.3329	24.1383	24.7405	23.8877	26.9215	25.9501	27.588	25.9746	25.9371	26.4801	29.378	29.1942	28.0385	28.836	25	25	65.4	36.627	0	323.31	22189000000	199
DERPT_G11097	Full=Spectrin alpha non-erythrocytic 1 ame: Full=Alpha-II spectrin ame: Full=Fodrin alpha chain nucleus,Golgi apparatus,lipid droplet,cytosol,fascia adherens,spectrin,spectrin-associated cytoskeleton,microtubule cytoskeleton,basolateral plasma membrane,lat	17	4	25.7887	24.2684	26.3587	25.247	26.3108	26.9698	28.4359	27.7172	27.4893	29.4271	29.6117	30.4187	31.5282	29.2769	26.4241	24.928	24.7467	NaN	NaN	NaN	27.6984	28.3802	27.3044	27.4553	110	110	51.6	283.6	0	323.31	21680000000	336
DERPT_G11864	Full= flp ame: Full= cell part	13	4	21.0383	22.1341	27.2875	29.6354	30.8531	29.5463	26.8342	23.5706	20.6422	NaN	NaN	NaN	NaN	NaN	22.3159	19.3946	23.0307	22.3691	NaN	NaN	27.4823	26.1047	27.7057	25.7329	15	15	35.5	49.082	0	323.31	20977000000	133
DERPT_G3552	Full=1-pyrroline-5-carboxylate dehydrogenase Short=P5C dehydrogenase ame: Full=L-glutamate gamma-semialdehyde dehydrogenase mitochondrial matrix,1-pyrroline-5-carboxylate dehydrogenase activity,aldehyde dehydrogenase (NAD) activity,identical protein bindin	11	4	NaN	NaN	26.6866	27.1761	27.4836	28.8884	29.7234	28.6601	25.2876	20.995	NaN	NaN	23.0816	22.1594	24.4912	NaN	NaN	NaN	NaN	NaN	28.7488	28.5558	28.5871	28.348	38	38	65	65.924	0	323.31	20938000000	207
DERPT_G209	Full=Ras-related Ral-A Flags: Precursor exocyst,autophagosome,cytosol,plasma membrane,cell-cell junction,focal adhesion,endocytic vesicle,midbody,cleavage furrow,myelin sheath,extracellular exosome,GTPase activity,MAP kinase kinase activity,protein tyrosin	12	4	NaN	NaN	23.8373	25.7822	27.262	28.9372	30.5455	29.1019	24.0846	22.3205	NaN	NaN	22.5817	NaN	NaN	26.3467	26.3752	26.4185	NaN	NaN	27.9448	27.8415	28.4584	27.8849	42	42	57.5	66.803	0	323.31	20744000000	223
DERPT_G11320	Full=2-oxoglutarate mitochondrial ame: Full=2-oxoglutarate dehydrogenase complex component E1 Short=OGDC-E1 ame: Full=Alpha-ketoglutarate dehydrogenase Flags: Precursor cytosol,mitochondrial oxoglutarate dehydrogenase complex,mitochondrial membrane,mitocho	13	4	24.7258	26.3525	27.3943	27.4542	28.0686	29.966	27.0128	24.065	NaN	NaN	NaN	NaN	24.6493	27.3896	27.8511	27.0352	26.9192	NaN	NaN	NaN	28.4239	29.3033	26.9417	29.0059	63	63	58.6	126.69	0	323.31	20709000000	215
DERPT_G5561	Full=Inositol-3-phosphate synthase Short=MIP synthase ame: Full=Myo-inositol 1-phosphate synthase Short=IPS Short=MI-1-P synthase cytoplasm,inositol-3-phosphate synthase activity,protein binding,inositol biosynthetic process,phospholipid biosynthetic proce	6	4	NaN	23.9538	26.5215	28.1413	30.1125	30.1657	26.4996	NaN	NaN	NaN	NaN	NaN	NaN	NaN	NaN	NaN	NaN	NaN	NaN	NaN	27.8053	27.846	28.387	28.4765	39	39	74.6	61.823	0	323.31	20206000000	191
DERPT_G8193	Full=Ribose-5-phosphate isomerase ame: Full=D-ribose-5-phosphate ketol-isomerase ame: Full=Phosphoriboisomerase nucleus,cytoplasm,ribose-5-phosphate isomerase activity,identical protein binding,monosaccharide binding,D-ribose metabolic process,pyridoxine b	6	4	NaN	NaN	NaN	24.0863	NaN	28.2285	30.2782	28.8214	26.0661	NaN	NaN	NaN	NaN	NaN	NaN	NaN	25.1227	NaN	NaN	NaN	28.5491	27.5973	29.2684	27.7699	25	25	84.1	25.601	0	323.31	20195000000	148
DERPT_G6343	Allergen Homolog (Hom s alpha-galactosidase): Full=Alpha-N-acetylgalactosaminidase ame: Full=Alpha-galactosidase B Flags: Precursor extracellular space,lysosome,plant-type cell wall,apoplast,alpha-galactosidase activity,protein binding,bone mineralization,	8	4	NaN	NaN	22.3734	24.6371	25.6863	28.8742	29.6124	27.3933	24.8932	NaN	NaN	22.5366	NaN	NaN	NaN	NaN	NaN	NaN	NaN	NaN	29.2286	28.8706	28.2357	28.6995	33	31	73.1	57.794	0	323.31	20065000000	162
DERPT_G11070	Full=WD repeat-containing 1 ame: Full=Actin-interacting 1 Short=AIP1 cytosol,membrane,sarcoplasm,myofibril,cell junction,cortical actin cytoskeleton,actomyosin, actin portion,cell projection,myelin sheath,membrane-bounded organelle,actin filament binding,n	16	4	24.3147	22.9645	25.8313	25.5825	22.8842	22.1162	21.0469	25.1227	27.2931	28.9315	26.2998	22.2682	25.8266	26.1778	24.8145	23.6061	NaN	NaN	NaN	NaN	29.4313	28.9965	28.5121	29.6569	37	37	70.8	68.19	0	323.31	20029000000	214
DERPT_G6231	Full=Glucosylceramidase ame: Full=Acid beta-glucosidase ame: Full=Beta-glucocerebrosidase ame: Full=D-glucosyl-N-acylsphingosine glucohydrolase Flags: Precursor extracellular space,nucleus,mitochondrial inner membrane,lysosomal membrane,lipid droplet,lysos	12	4	NaN	NaN	22.5729	22.0603	22.9851	26.8542	29.8718	28.4961	27.3499	20.7322	NaN	21.2455	22.1554	23.1457	NaN	NaN	NaN	22.3525	NaN	NaN	29.1192	29.0212	27.1578	28.8417	47	47	28	235.1	0	323.31	19869000000	177
DERPT_G10735	Full=Uncharacterized UDP-glucosyltransferase cytoplasm,intracellular membrane-bounded organelle,binding,transferase activity, transferring hexosyl groups,steroid metabolic process,antibiotic metabolic process,cellular process	12	4	NaN	NaN	20.9236	22.1257	23.1616	25.0421	26.0174	29.0932	30.0751	27.2473	24.7837	22.7534	NaN	23.1438	NaN	NaN	24.3393	NaN	NaN	NaN	29.0283	28.2266	27.6274	29.0406	32	32	70.5	51.419	0	323.31	19553000000	170
DERPT_G10644	Full=Dystrophin adherens junction,cell cortex,intercalated disc,actin cytoskeleton,microtubule cytoskeleton,basolateral plasma membrane,cell-substrate junction,A band,cell projection,nuclear part,endoplasmic reticulum part,intermediate filament cytoskeleto	18	4	30.2646	29.7136	30.635	30.3952	28.1792	27.9205	26.528	25.3475	23.5011	24.1531	26.3111	27.1857	25.891	25.679	24.2726	23.2666	22.8292	22.7248	NaN	NaN	27.6922	28.4898	27.1117	27.5739	183	179	44.6	510.79	0	323.31	19394000000	535
DERPT_G11121	Full=Prolyl endopeptidase Short=PE ame: Full=Post-proline cleaving enzyme nucleus,cytoplasmic part,serine-type endopeptidase activity,serine-type exopeptidase activity,proteolysis	6	4	NaN	NaN	NaN	23.6753	21.6317	25.7295	29.9287	29.7031	25.8218	NaN	NaN	NaN	NaN	NaN	NaN	NaN	NaN	NaN	NaN	NaN	28.5915	27.8903	27.6301	28.0967	44	44	77.9	88.301	0	323.31	19347000000	177
DERPT_G7538	Full=Beta-galactosidase Short=Beta-gal ame: Full=Lactase extracellular space,membrane,lysosomal lumen,extracellular exosome,beta-glucuronidase activity,signaling receptor binding,protein domain specific binding,hyaluronan catabolic process,starch metabolic	5	4	NaN	NaN	27.4524	30.6405	29.9278	27.6989	23.6579	NaN	NaN	NaN	NaN	NaN	NaN	NaN	NaN	NaN	NaN	NaN	NaN	NaN	28.0776	27.7199	28.3046	27.721	34	34	57.4	78.563	0	323.31	19288000000	173
DERPT_G9522	Full=Talin-1 ruffle,microtubule organizing center,cytosol,clathrin-coated pit,fascia adherens,focal adhesion,cellular bud,cell cortex,extrinsic component of plasma membrane,clathrin-coated vesicle,site of polarized growth,intracellular membrane-bounded org	16	4	24.6763	NaN	22.876	24.18	24.9669	27.0186	27.5478	27.9294	29.1749	29.2527	29.1115	28.3687	27.5332	26.7339	25.4591	23.8967	22.9963	NaN	NaN	NaN	28.3564	28.1677	28.8087	28.0501	85	85	47.3	286.92	0	323.31	19229000000	357
DERPT_G917	Full=Isocitrate dehydrogenase nucleoplasm,nucleolus,mitochondrial isocitrate dehydrogenase complex (NAD+),mitochondrial nucleoid,nucleotide binding,isocitrate dehydrogenase (NAD+) activity,zinc ion binding,tricarboxylic acid cycle,isocitrate metabolic proc	13	4	26.3982	27.7058	29.5295	30.9212	29.5277	27.1312	24.7979	NaN	22.2551	NaN	NaN	NaN	24.1923	NaN	NaN	NaN	24.3259	24.1527	25.2703	23.7942	27.024	27.1311	27.1222	27.0361	15	15	51.5	45.785	0	323.31	19011000000	131
DERPT_G4295	Proposed StenAllergen, Allergen Homolog (Blo t13, Der f13, Der p13, Aca s13): Full=Fatty acid-binding heart ame: Full=Fatty acid-binding 3 ame: Full=Heart-type fatty acid-binding Short=H-FABP nucleoplasm,cytosol,cell-cell junction,cell projection,neuronal	9	4	NaN	NaN	NaN	NaN	NaN	24.1155	NaN	NaN	NaN	29.5026	30.2071	30.2845	28.4314	26.315	25.4433	24.8402	24.0986	NaN	NaN	NaN	27.7029	27.6164	28.8829	28.1366	18	18	89.4	15.232	0	323.31	18935000000	117
DERPT_G7050	Full=Ornithine aminotransferase ame: Full=Ornithine--oxo-acid aminotransferase nucleus,mitochondrial matrix,cytosol,ornithine-oxo-acid transaminase activity,zinc ion binding,pyridoxal phosphate binding,identical protein binding,ornithine catabolic process,	8	4	NaN	NaN	NaN	26.8978	30.6225	29.9921	26.4255	23.0498	NaN	23.5417	23.2514	NaN	NaN	NaN	NaN	24.0692	NaN	NaN	NaN	NaN	27.4972	28.0423	26.4366	27.9855	32	32	74.1	49.186	0	323.31	18819000000	166
DERPT_G11449	Full=Palladin actin cytoskeleton,I band,cell projection,membrane-bounded organelle,cytoskeletal part,enzyme binding,actinin binding,heart development,myofibril assembly,epithelium development,biological regulation	14	4	24.3932	24.7902	NaN	23.2188	24.1282	25.52	25.0829	27.0092	26.7479	28.2404	29.8506	29.2166	27.6042	25.092	24.6564	NaN	NaN	NaN	NaN	NaN	27.9379	28.2836	29.5584	28.5272	147	140	8.8	3087.5	0	323.31	18210000000	437
DERPT_G11735	Full=Hexokinase-2 ame: Full=Hexokinase type II Short=HK II nucleus,mitochondrion,cytosol,cell cortex,intracellular organelle part,membrane raft,sperm principal piece,glucokinase activity,protein binding,ATP binding,glucose binding,cellular glucose homeosta	7	4	NaN	NaN	NaN	NaN	NaN	23.4184	26.2348	29.5162	30.0969	27.5149	24.5048	NaN	25.0503	NaN	NaN	NaN	NaN	NaN	NaN	NaN	28.1934	28.2317	26.4587	28.274	33	33	71.7	54.621	0	323.31	17994000000	166
DERPT_G8039	Full=Lysosomal alpha-mannosidase Short=Laman ame: Full=Lysosomal acid alpha-mannosidase ame: Full=Mannosidase alpha class 2B member 1 ame: Full=Mannosidase alpha-B Flags: Precursor extracellular region,cell wall,vacuole,Golgi apparatus,intracellular organe	5	4	NaN	NaN	26.4147	28.222	30.5704	29.2594	26.241	NaN	NaN	NaN	NaN	NaN	NaN	NaN	NaN	NaN	NaN	NaN	NaN	NaN	27.6625	27.624	28.4872	27.6546	50	50	62.3	119.03	0	323.31	17829000000	205
DERPT_G9236	CG9896	20	4	24.5026	23.9565	25.0623	21.3865	23.2526	23.029	24.5369	27.6095	29.6417	29.8449	28.5097	28.4583	27.0136	27.007	27.5273	24.657	26.7905	27.6628	27.4567	26.9927	28.6655	27.139	29.5299	28.1258	20	20	51.3	31.626	0	323.31	17292000000	174
DERPT_G11193	Full=Neutral alpha-glucosidase AB ame: Full=Alpha-glucosidase 2 ame: Full=Glucosidase II subunit alpha Flags: Precursor extracellular region,chloroplast,membrane,glucosidase II complex,alpha-1,4-glucosidase activity,protein binding,carbohydrate binding,N-g	6	4	NaN	NaN	NaN	25.7989	24.2339	27.2686	29.7128	28.4182	24.7006	NaN	NaN	NaN	NaN	NaN	NaN	NaN	NaN	NaN	NaN	NaN	28.4998	27.5958	29.0794	27.9139	44	44	56.6	108.87	0	323.31	17227000000	214
DERPT_G7931	Full=Proteasome subunit beta type-5 Flags: Precursor nucleoplasm,endoplasmic reticulum membrane,centrosome,proteasome core complex, beta-subunit complex,proteasome storage granule,extracellular exosome,spermatoproteasome complex,threonine-type endopeptidas	7	4	26.1606	29.1901	31.7	28.8575	25.8313	23.6044	NaN	NaN	NaN	NaN	NaN	NaN	NaN	NaN	22.5117	NaN	NaN	NaN	NaN	NaN	26.6744	26.461	26.7369	27.3496	24	24	70.2	31.166	0	323.31	17148000000	114
DERPT_G11422	Full=Chitotriosidase-1 ame: Full=Chitinase-1 Flags: Precursor extracellular region,endoplasmic reticulum,vesicle,chitinase activity,chitin binding,carbohydrate metabolic process,inflammatory response,activation of NF-kappaB-inducing kinase activity,positiv	9	4	NaN	NaN	NaN	NaN	NaN	22.1085	28.1382	30.2595	28.1027	24.1708	22.3773	NaN	22.0105	24.1364	24.1963	NaN	NaN	NaN	NaN	NaN	28.3426	28.2637	24.6493	28.2932	38	38	65.5	59.889	0	323.31	17138000000	166
DERPT_G4880	Full=Short-chain specific acyl- mitochondrial Short=SCAD ame: Full=Butyryl- dehydrogenase Flags: Precursor mitochondrial matrix,mitochondrial membrane,fatty-acyl-CoA binding,long-chain-acyl-CoA dehydrogenase activity,electron transfer activity,palmitoyl-Co	8	4	22.3013	NaN	NaN	NaN	26.3142	30.6477	29.3103	26.3814	23.1054	NaN	NaN	NaN	22.553	NaN	NaN	NaN	NaN	NaN	23.6402	NaN	27.318	26.8182	28.5107	26.838	24	24	37.4	88.27	0	323.31	17135000000	104
DERPT_G8185	Full=Rab GDP dissociation inhibitor alpha Short=Rab GDI alpha ame: Full=Guanosine diphosphate dissociation inhibitor 1 Short=GDI-1 Golgi apparatus,cytosol,focal adhesion,plasmodesma,membrane,midbody,neuron projection,myelin sheath,protein-containing comple	9	4	NaN	NaN	20.8324	21.152	20.2501	22.7736	23.5902	27.5292	28.9008	24.5554	NaN	21.2928	NaN	NaN	NaN	NaN	NaN	NaN	NaN	NaN	28.94	28.8483	28.7333	29.0161	32	32	76.1	50.419	0	323.31	17130000000	137
DERPT_G6766	Full=Polypeptide N-acetylgalactosaminyltransferase 1 ame: Full=Polypeptide c transferase 1 Short= c-T1 Short=pp- ase 1 ame: Full= -UDP acetylgalactosaminyltransferase 1 ame: Full=UDP- c:polypeptide N-acetylgalactosaminyltransferase 1 Contains: ame: Full=Po	10	4	NaN	NaN	NaN	NaN	NaN	21.4868	25.0766	29.4885	28.6075	24.1162	NaN	24.0884	24.9886	24.7418	NaN	24.6503	24.6487	NaN	NaN	NaN	28.4383	28.6659	28.1911	28.4353	26	23	29.6	136.63	0	323.31	17090000000	125
DERPT_G10545	Full=Glutamate synthase mitochondrion,cytosol,plasma membrane,chloroplast stroma,chloroplast envelope,apoplast,iron ion binding,protein binding,FMN binding,glutamate synthase (NADH) activity,glutamate synthase (ferredoxin) activity,flavin adenine dinucleot	11	4	22.8893	23.4188	23.6149	26.1578	28.4344	27.9257	22.7782	NaN	21.5451	NaN	NaN	NaN	24.1471	24.2112	23.7119	NaN	NaN	NaN	NaN	NaN	28.8909	29.685	26.6678	29.1388	95	95	59.7	233.48	0	323.31	16956000000	322
DERPT_G10254	Full=Ankyrin-3 Short=ANK-3 ame: Full=Ankyrin-G integral component of plasma membrane,bicellular tight junction,basal plasma membrane,cell surface,postsynaptic density,intercalated disc,spectrin-associated cytoskeleton,lateral plasma membrane,sarcoplasmic r	19	4	24.9044	26.2093	26.6102	27.1218	26.7781	26.9385	27.4081	29.2658	28.4304	26.955	25.6278	25.6754	25.5851	26.0745	26.3902	26.4077	27.6701	27.6865	27.8712	NaN	27.8563	28.216	28.23	27.631	45	45	19.6	325.52	0	323.31	16946000000	259
DERPT_G9982	Full=4-aminobutyrate aminotransferase ame: Full=GABA aminotransferase Short=GABA-AT ame: Full=Gamma-amino-N-butyrate transaminase Short=GABA transaminase mitochondrial matrix,cytosol,4-aminobutyrate transaminase complex,neuron projection,extracellular exos	9	4	NaN	NaN	22.5377	22.0248	22.3248	22.4204	28.4481	28.796	25.5084	NaN	21.17	NaN	23.0262	NaN	NaN	NaN	NaN	NaN	NaN	NaN	28.9123	28.2926	28.8715	28.7943	42	42	81.9	57.443	0	323.31	16799000000	179
DERPT_G3343	Full=NADH dehydrogenase mitochondrial respiratory chain complex I,protein binding,NADH dehydrogenase (ubiquinone) activity,FMN binding,metal ion binding,quinone binding,NAD binding,4 iron, 4 sulfur cluster binding,mitochondrial electron transport, NADH to	11	4	23.4457	NaN	21.948	22.6845	23.5665	25.9928	27.2861	29.1226	28.273	NaN	NaN	NaN	22.6353	24.6192	NaN	24.8956	NaN	NaN	NaN	NaN	28.8003	28.4697	28.5051	28.7249	29	29	67.9	54.464	0	323.31	16751000000	164
DERPT_G10829	Full=Iron-responsive element-binding 2 Short=IRE-BP 2 cell wall,mitochondrion,vacuolar membrane,endoplasmic reticulum,Golgi apparatus,cytosol,plasma membrane,plasmodesma,chloroplast stroma,apoplast,extracellular exosome,aconitate hydratase activity,copper	9	4	23.7709	NaN	19.3428	19.8363	21.5269	23.434	28.0534	27.9233	24.0048	NaN	NaN	NaN	NaN	NaN	NaN	NaN	NaN	NaN	NaN	22.97	28.9966	29.0154	27.758	29.146	44	44	60.8	115.2	0	323.31	16622000000	198
DERPT_G11310	Full=Periaxin membrane,intracellular organelle,cytoplasmic part,protein binding,nervous system development,cellular process	11	4	NaN	NaN	NaN	NaN	24.7677	23.6013	23.7304	25.7805	28.2903	30.0684	28.9652	28.7597	28.0635	25.3857	NaN	23.6016	NaN	NaN	NaN	NaN	27.4068	27.8111	29.1052	27.923	93	93	19.7	864.64	0	323.31	15897000000	265
DERPT_G9632	Full=Phosphoglucomutase-1 Short=PGM 1 ame: Full=Glucose phosphomutase 1 nucleus,cytosol,cell-cell adherens junction,chloroplast,actin cytoskeleton,dystrophin-associated glycoprotein complex,Z disc,cell-substrate junction,sarcolemma,plastid part,apoplast,ex	8	4	NaN	NaN	22.2256	22.9424	22.6617	25.9998	28.2854	29.53	27.4492	23.2463	NaN	NaN	NaN	NaN	NaN	NaN	NaN	NaN	NaN	NaN	28.2107	27.933	28.8515	27.8837	36	36	86.2	62.395	0	323.31	15846000000	204
DERPT_G3333	Full=Probable serine carboxypeptidase CPVL Flags: Precursor vacuole,extracellular exosome,serine-type carboxypeptidase activity,proteolysis involved in cellular protein catabolic process	9	4	24.8173	NaN	22.0819	NaN	21.0728	24.249	28.8724	29.662	27.6481	23.427	NaN	NaN	NaN	NaN	21.9154	NaN	NaN	NaN	NaN	NaN	27.8469	28.044	27.037	27.9519	23	23	62.9	53.846	0	323.31	15772000000	135
DERPT_G12021	Full=Hydroxysteroid dehydrogenase 2 mitochondrion,membrane,oxidoreductase activity,metabolic process	15	4	24.8204	NaN	23.6307	23.7419	25.3872	25.6998	27.9448	29.7462	28.732	23.2351	NaN	25.9321	27.9423	26.8909	25.8332	NaN	24.2034	23.947	NaN	NaN	28.1722	28.0051	26.7548	28.0446	32	32	56.8	64.189	0	323.31	15334000000	162
DERPT_G10000	Full=Lysosomal Pro-X carboxypeptidase ame: Full=Proline carboxypeptidase ame: Full=Prolylcarboxypeptidase Short=PRCP Flags: Precursor extracellular region,vesicle,intracellular membrane-bounded organelle,cytoplasmic part,basal part of cell,aminopeptidase a	9	4	NaN	NaN	22.5068	22.3945	24.4934	27.7585	29.3221	27.2281	22.4323	NaN	NaN	23.9024	NaN	NaN	22.7005	NaN	NaN	NaN	NaN	NaN	28.0396	29.1221	28.4171	27.7204	27	27	52.7	56.635	0	323.31	15103000000	143
DERPT_G1029	Full=3-oxoacyl- mitochondrial envelope,mitochondrial matrix,plasma membrane,3-hydroxyacyl-CoA dehydrogenase activity,estradiol 17-beta-dehydrogenase activity,protein binding,testosterone dehydrogenase (NAD+) activity,NAD binding,fatty acid biosynthetic pro	4	4	NaN	NaN	NaN	NaN	NaN	26.0382	30.094	28.9883	26.2306	NaN	NaN	NaN	NaN	NaN	NaN	NaN	NaN	NaN	NaN	NaN	27.5586	27.2801	28.0046	27.6484	21	21	89.2	26.549	0	323.31	15011000000	100
DERPT_G10626	Full=Regucalcin Short=RC ame: Full=Gluconolactonase Short=GNL ame: Full=Senescence marker 30 Short=SMP-30 nucleus,cytoplasm,hydrolase activity,metal ion binding,negative regulation of macromolecule metabolic process,regulation of phosphate metabolic proces	8	4	NaN	NaN	NaN	NaN	NaN	NaN	NaN	22.99	28.5538	29.8369	28.1357	25.2342	23.8978	22.9553	NaN	NaN	24.5333	NaN	NaN	NaN	28.6044	27.1673	28.7981	27.8277	28	28	51.6	53.061	0	323.31	14966000000	130
DERPT_G4970	Full=Ribokinase Short=RK extracellular exosome,ribokinase activity,protein binding,D-ribose metabolic process,pentose-phosphate shunt	7	4	NaN	NaN	NaN	20.0028	NaN	23.1146	27.3839	28.9153	25.9908	22.0618	22.2098	NaN	NaN	NaN	NaN	NaN	NaN	NaN	NaN	NaN	28.7204	28.2075	28.8469	28.0721	26	26	84.2	35.15	0	323.31	14747000000	149
DERPT_G3693	Full=V-type proton ATPase catalytic subunit A Short=V-ATPase subunit A ame: Full=V-ATPase 69 kDa subunit ame: Full=Vacuolar proton pump subunit alpha vacuolar proton-transporting V-type ATPase, V1 domain,plant-type vacuole,cell wall,mitochondrion,lysosomal	13	4	27.6449	26.3337	26.3977	25.3572	23.9562	24.1128	25.1774	NaN	NaN	NaN	23.8433	25.2714	26.5841	26.9842	25.94	25.2966	NaN	NaN	NaN	NaN	28.5686	29.3799	27.6006	29.2974	38	38	51	108.22	0	323.31	14744000000	179
DERPT_G10013	Full=Uroporphyrinogen decarboxylase Short=UPD Short=URO-D nucleoplasm,cytosol,uroporphyrinogen decarboxylase activity,ferrous iron binding,heme biosynthetic process,uroporphyrinogen III metabolic process,chlorophyll metabolic process	4	4	NaN	NaN	NaN	NaN	NaN	24.1223	28.8243	29.7179	26.3472	NaN	NaN	NaN	NaN	NaN	NaN	NaN	NaN	NaN	NaN	NaN	27.8785	27.1439	28.6384	27.8231	25	25	84.5	41.931	0	323.31	14726000000	130
DERPT_G3798	Full=Alcohol dehydrogenase class-3 ame: Full=Alcohol dehydrogenase class-III ame: Full=Glutathione-dependent formaldehyde dehydrogenase Short=FALDH Short=FDH Short=GSH-FDH ame: Full=S-(hydroxymethyl)glutathione dehydrogenase nucleus,mitochondrion,peroxisom	7	4	NaN	NaN	21.3666	NaN	22.3946	23.1308	28.2365	28.674	26.9053	NaN	NaN	NaN	22.891	NaN	NaN	NaN	NaN	NaN	NaN	NaN	28.576	28.0082	28.7206	28.2729	16	16	52.9	41.011	0	323.31	13955000000	107
DERPT_G9988	Full=Glucosamine-6-phosphate isomerase 1 ame: Full=Glucosamine-6-phosphate deaminase 1 Short=GNPDA 1 Short= 6P deaminase 1 ame: Full=Oscillin nucleus,cytoplasm,extracellular exosome,glucosamine-6-phosphate deaminase activity,hydrolase activity,fructose 6-p	6	4	NaN	NaN	27.1515	28.6232	29.0208	28.5379	25.4367	NaN	NaN	NaN	NaN	NaN	NaN	24.0117	NaN	NaN	NaN	NaN	NaN	NaN	27.855	27.7019	28.8414	28.2153	19	19	76.1	33.296	0	323.31	13926000000	134
DERPT_G5899	Full=FUN14 domain-containing 1 integral component of mitochondrial outer membrane,protein binding,autophagy of mitochondrion,response to hypoxia	11	4	27.5559	26.8673	29.4097	29.3457	26.8932	26.6551	28.2979	27.0736	24.2436	NaN	NaN	25.9623	25.4784	NaN	NaN	NaN	NaN	NaN	NaN	NaN	27.4626	27.2078	26.8304	27.1886	43	43	21.5	225.89	0	323.31	13845000000	221
DERPT_G4941	Full=Complement component 1 Q subcomponent-binding mitochondrial ame: Full=GC1q-R ame: Full=Glyco gC1qBP Short=C1qBP Flags: Precursor mitochondrial matrix,protein binding,regulation of cytokine production,regulation of immune effector process,regulation of	8	4	25.1182	NaN	NaN	NaN	NaN	25.8876	29.0628	27.259	25.8244	NaN	NaN	NaN	22.3092	22.6339	26.3549	NaN	NaN	NaN	NaN	NaN	27.9479	28.9281	26.7065	28.8227	13	13	69.4	28.983	0	323.31	13823000000	99
DERPT_G4155	--NA--	10	4	31.9704	28.5213	28.3846	27.8256	26.77	26.6157	22.8654	NaN	22.4852	22.6195	21.9435	NaN	NaN	NaN	NaN	NaN	NaN	NaN	NaN	NaN	27.2552	26.7641	26.9573	27.3987	84	83	49.9	198.98	0	323.31	13761000000	276
DERPT_G4250	---NA---	9	4	NaN	NaN	22.8612	NaN	NaN	23.9378	26.5373	28.256	29.3958	25.5455	NaN	22.3318	NaN	23.7729	NaN	24.5434	NaN	NaN	NaN	NaN	28.587	27.7197	27.6659	28.3212	27	27	61.4	50.382	0	323.31	13432000000	113
DERPT_G4185	Full=Pyruvate kinase Short=PK nucleus,mitochondrion,lipid droplet,cytosol,plasma membrane,cell-cell adherens junction,cilium,extracellular matrix,P granule,myelin sheath,extracellular exosome,magnesium ion binding,pyruvate kinase activity,MHC class II prot	11	4	23.4491	25.2046	27.4532	28.2544	28.632	28.7696	27.5171	25.9724	22.6813	NaN	NaN	NaN	23.8208	24.1764	NaN	NaN	NaN	NaN	NaN	NaN	27.8386	28.1895	24.6844	27.8569	38	36	79.3	55.645	0	323.31	13426000000	185
DERPT_G4241	Full=Oxidoreductase peroxisomal membrane,nuclear membrane,extracellular exosome,3-keto sterol reductase activity,carbonyl reductase (NADPH) activity,signaling receptor binding,oxidoreductase activity, acting on NAD(P)H, quinone or similar compound as accep	9	4	NaN	NaN	NaN	NaN	NaN	26.1988	30.0769	28.3413	25.7195	23.1061	NaN	NaN	24.9715	25.1227	23.8256	NaN	NaN	25.0968	NaN	NaN	27.646	27.356	26.8449	27.8996	20	20	61.5	31.377	0	323.31	13355000000	97
DERPT_G1524	Full=Tissue alpha-L-fucosidase ame: Full=Alpha-L-fucosidase I ame: Full=Alpha-L-fucoside fucohydrolase 1 Short=Alpha-L-fucosidase 1 Flags: Precursor extracellular space,lysosomal lumen,extracellular exosome,alpha-L-fucosidase activity,fucose binding,fucose	5	4	NaN	NaN	25.5762	28.6798	29.893	27.9413	24.1488	NaN	NaN	NaN	NaN	NaN	NaN	NaN	NaN	NaN	NaN	NaN	NaN	NaN	27.6465	27.4196	28.2466	27.1773	32	32	60.6	52.639	0	323.31	13263000000	142
DERPT_G10826	Full= argonaute-2 Short=Argonaute2 ame: Full=Argonaute RISC catalytic component 2 ame: Full=Eukaryotic translation initiation factor 2C 2 Short=eIF-2C 2 Short=eIF2C 2 ame: Full= slicer nucleus,ribonucleoprotein complex,cytoplasmic part,RNA binding,protein	11	4	20.6273	NaN	25.2785	26.3562	25.223	27.3441	28.188	27.741	23.4878	22.3196	22.3349	22.1539	NaN	NaN	NaN	NaN	NaN	NaN	NaN	NaN	27.9331	28.2238	28.5654	28.199	49	48	53.1	106.72	0	323.31	13012000000	217
DERPT_G3657	Full=Neural cell adhesion molecule 1 Short=N-CAM-1 Short=NCAM-1 ame: CD_antigen=CD56 Flags: Precursor extracellular region,membrane,sarcomere,cytoskeletal protein binding,muscle contraction,myofibril assembly,response to chemical,neuron development,cardiac	18	4	23.744	24.2265	24.6087	25.1129	22.6723	24.7712	29.297	28.7665	28.5524	27.6891	24.2094	23.8873	23.2435	NaN	NaN	25.8672	27.402	26.8933	29.1699	28.0405	28.9659	28.7578	28.3517	28.6903	22	22	68.4	48.039	0	323.31	12654000000	116
DERPT_G85	Full=Collagen alpha-1(IV) chain Contains: ame: Full=Arresten Flags: Precursor collagen type IV trimer,extracellular matrix structural constituent,morphogenesis of an epithelium,cell surface receptor signaling pathway,embryo development ending in birth or e	16	4	28.7088	28.9993	29.1594	28.2614	27.1916	28.4491	26.3425	21.9464	20.6173	22.0706	23.0367	24.7968	23.726	23.2302	23.2466	NaN	NaN	21.7467	NaN	NaN	27.0169	25.6406	26.838	26.0182	20	20	11	177.44	0	323.31	11961000000	173
DERPT_G9703	---NA---	16	4	29.919	30.083	29.8148	28.5424	27.4825	27.7565	25.9918	23.5882	24.466	26.2994	26.4671	26.3911	26.0809	26.671	26.6349	25.9003	NaN	NaN	NaN	NaN	26.4516	26.117	26.7686	26.3105	20	20	49.8	36.211	0	323.31	11950000000	154
DERPT_G11171	Full=Thioredoxin reductase cytoplasmic Short=TR ame: Full=Thioredoxin reductase TR1 nucleoplasm,nucleolus,mitochondrion,cytosol,ribosome,microtubule associated complex,chloroplast,neuron projection,neuronal cell body,extracellular exosome,structural consti	7	4	NaN	NaN	23.1631	22.723	23.6711	27.6084	28.4792	24.7533	24.6559	NaN	NaN	NaN	NaN	NaN	NaN	NaN	NaN	NaN	NaN	NaN	28.3447	27.8937	27.2342	28.4991	32	32	43.5	109.07	0	323.31	11707000000	133
DERPT_G3224	Full=Adenosine deaminase ame: Full=Adenosine aminohydrolase nucleus,cytosol,integral component of mitochondrial outer membrane,AMP deaminase activity,myosin heavy chain binding,ion binding,protein histidine kinase binding,guanine salvage,response to abscis	5	4	NaN	NaN	26.2615	28.5906	29.7854	27.9399	22.8859	NaN	NaN	NaN	NaN	NaN	NaN	NaN	NaN	NaN	NaN	NaN	NaN	NaN	27.6485	27.8063	26.6499	27.2368	36	36	50.5	90.862	0	323.31	11261000000	153
DERPT_G7593	---NA---	13	4	NaN	NaN	24.2376	NaN	NaN	NaN	NaN	NaN	25.4118	27.4571	29.5085	30.7692	30.3543	27.1778	27.466	26.7971	26.3825	25.2774	23.2173	22.9995	24.9466	24.6878	25.5813	24.2562	15	15	38	32.966	0	323.31	11209000000	61
DERPT_G3376	Full=Tryptophan 5-hydroxylase 1 ame: Full=Tryptophan 5-monooxygenase 1 nucleus,mitochondrion,smooth endoplasmic reticulum,lipid droplet,cytosol,synaptic vesicle,cytoplasmic side of plasma membrane,dendrite,melanosome membrane,terminal bouton,perikaryon,ext	12	4	NaN	NaN	23.6747	23.8466	27.4615	29.4254	25.2597	23.3224	26.6113	26.8742	NaN	24.0674	24.6218	24.4991	24.1147	NaN	NaN	NaN	NaN	NaN	27.314	27.5433	27.0938	28.1298	34	34	77.5	53.182	0	323.31	11112000000	141
DERPT_G5776	Full=Acetylcholinesterase Short=A Flags: Precursor endoplasmic reticulum,plasma membrane,integral component of membrane,organelle envelope,extracellular region part,synapse,neuron part,cholinesterase activity,protein binding,solute:proton antiporter activi	3	4	NaN	NaN	NaN	NaN	NaN	NaN	26.7288	28.6438	27.636	NaN	NaN	NaN	NaN	NaN	NaN	NaN	NaN	NaN	NaN	NaN	27.9716	27.6154	28.2516	27.9466	33	33	37.6	123.59	0	323.31	11025000000	156
DERPT_G6816	Full=Urocanate hydratase Short=Urocanase ame: Full=Imidazolonepropionate hydrolase cytosol,urocanate hydratase activity,glutamate metabolic process,histidine catabolic process	9	4	NaN	NaN	24.0059	23.6388	25.5739	28.2002	28.8688	26.5438	22.7331	NaN	NaN	NaN	NaN	NaN	NaN	NaN	22.3201	24.0234	NaN	NaN	27.7747	27.4507	28.2454	27.3485	38	38	60.3	75.719	0	323.31	10934000000	161
DERPT_G763	Full= disulfide-isomerase Short=PDI ame: Full=Cellular thyroid hormone-binding ame: Full=Prolyl 4-hydroxylase subunit beta ame: Full=p55 Flags: Precursor catalytic activity,protein binding,cell redox homeostasis	13	4	24.5517	NaN	25.5659	26.3425	26.2385	27.082	26.8567	26.5241	26.1792	27.2439	27.5863	24.8452	24.6357	25.8282	NaN	NaN	NaN	NaN	NaN	NaN	28.3664	27.5665	27.5377	27.8151	67	67	45.8	222.79	0	323.31	10923000000	284
DERPT_G214	Full=E3 ubiquitin- ligase MARCH5 ame: Full=Membrane-associated RING finger 5 ame: Full=Membrane-associated RING-CH V Short=MARCH-V ame: Full=RING-type E3 ubiquitin transferase MARCH5 organelle membrane,mitochondrial part,Golgi apparatus part,zinc ion bindi	10	4	NaN	NaN	NaN	NaN	NaN	NaN	NaN	27.4204	29.9012	26.9413	25.6416	23.9802	25.5994	23.0925	NaN	NaN	25.0611	24.4396	25.5227	NaN	28.1807	27.4956	27.7867	26.9886	35	35	24.2	138.08	0	323.31	10889000000	140
DERPT_G7856	Full=Histidine ammonia-lyase Short=Histidase cytoplasm,histidine ammonia-lyase activity,glutamate metabolic process,histidine catabolic process,zinc ion homeostasis,stress response to zinc ion	8	4	21.8533	21.3486	24.8726	26.3249	27.9964	29.2602	26.8695	22.3881	NaN	NaN	NaN	NaN	NaN	NaN	NaN	NaN	NaN	NaN	NaN	NaN	27.293	27.3912	27.8558	27.2059	32	32	65.6	74.772	0	323.31	10693000000	171
DERPT_G5858	Full=Dolichyl-diphosphooligosaccharide-- glycosyltransferase subunit 2 ame: Full=Dolichyl-diphosphooligosaccharide-- glycosyltransferase 63 kDa subunit ame: Full=Ribophorin II Short=RPN-II ame: Full=Ribophorin-2 Flags: Precursor oligosaccharyltransferase c	3	4	NaN	NaN	NaN	NaN	NaN	NaN	27.7839	27.9284	23.9864	NaN	NaN	NaN	NaN	NaN	NaN	NaN	NaN	NaN	NaN	NaN	28.4092	27.9735	25.7966	28.2466	36	36	69.1	71.88	0	323.31	10670000000	138
DERPT_G5860	Proposed Pan-Allergen, Allergen Homolog (Bomb m7, Aed a10, Dro m7, Der f10, Aca s10, Pso o10): Full=Tropomyosin striated muscle thin filament,actin filament binding,cytokinesis,nematode larval development,actin filament organization,embryo development endi	17	4	NaN	21.8654	24.4736	29.4423	29.154	26.6686	25.8497	25.983	23.8663	23.0973	26.4499	28.9527	29.9531	28.3603	24.5265	24.5921	21.2523	23.7126	NaN	NaN	23.6518	23.471	24.8942	23.3617	22	22	70.3	29.07	0	323.31	10550000000	142
DERPT_G9247	Full=Acetylcholinesterase Short=A Flags: Precursor endoplasmic reticulum,plasma membrane,extracellular region part,intracellular organelle part,synapse,neuron part,protein binding,carboxylic ester hydrolase activity,response to organonitrogen compound,cell	4	4	25.8066	23.7626	NaN	NaN	NaN	NaN	NaN	25.439	24.7076	NaN	NaN	NaN	NaN	NaN	NaN	NaN	NaN	NaN	NaN	NaN	28.6721	28.3266	27.4878	28.4332	27	27	40	103.22	0	323.31	10494000000	117
DERPT_G4123	Full=Delta 3 ame: Full=Drosophila Delta homolog 3 Short=Delta3 Flags: Precursor extracellular region,hydrolase activity, hydrolyzing O-glycosyl compounds,chitin binding,chitin metabolic process,macromolecule catabolic process,response to fungus,carbohydrat	11	4	31.7275	26.9379	26.6431	26.8846	26.3745	22.8921	24.3733	23.6409	25.1409	25.7497	22.6382	NaN	NaN	NaN	NaN	NaN	NaN	NaN	NaN	NaN	27.7675	27.6659	27.4918	26.8792	117	117	32.4	489.46	0	323.31	10158000000	290
DERPT_G899	Full=Contactin-4 ame: Full=Brain-derived immunoglobulin superfamily 2 Short=BIG-2 Flags: Precursor plasma membrane,pleated septate junction,cysteine-type endopeptidase activity,histone acetyltransferase activity,protein binding,regulation of transcription,	10	4	23.5212	NaN	NaN	24.5594	24.3217	23.2604	26.0629	25.2047	28.8978	28.8965	25.513	NaN	25.0127	NaN	NaN	NaN	NaN	NaN	NaN	NaN	27.319	28.0288	27.6339	27.8008	37	37	18.7	275.93	0	323.31	10046000000	118
DERPT_G8339	Full=Eukaryotic translation initiation factor 3 subunit D-1 Short=eIF3d-1 ame: Full=Eukaryotic translation initiation factor 3 subunit 7-1 ame: Full=Eukaryotic translation initiation factor 3 subunit p66 nucleus,cytosol,eukaryotic translation initiation fa	14	4	22.4663	NaN	NaN	NaN	NaN	NaN	24.4239	29.3299	29.0043	26.2505	24.2617	24.3935	26.4683	26.6171	26.4527	26.2814	26.7318	23.9537	22.6771	NaN	27.2233	27.3186	24.4634	27.1504	29	29	56	63.985	0	323.31	9954100000	124
DERPT_G10039	Full=Polyamine aminopropyltransferase ame: Full=Putrescine aminopropyltransferase Short=PAPT ame: Full=Spermidine synthase Short=SPDS Short=SPDSY spermine synthase activity,spermine biosynthetic process,arginine metabolic process,proline metabolic process,	8	4	NaN	24.2881	26.0946	26.8001	26.8434	28.4109	28.837	26.2519	23.1043	NaN	NaN	NaN	NaN	NaN	NaN	NaN	NaN	NaN	NaN	NaN	26.939	27.4796	24.6477	27.0324	30	30	77.6	46.09	0	323.31	9841000000	143
DERPT_G624	Full=Glycine dehydrogenase (decarboxylating) mitochondrial ame: Full=Glycine cleavage system P ame: Full=Glycine decarboxylase ame: Full=Glycine dehydrogenase (aminomethyl-transferring) Flags: Precursor nucleus,mitochondrial matrix,cytosol,plasma membrane,	1	4	NaN	NaN	NaN	NaN	NaN	NaN	NaN	NaN	NaN	NaN	NaN	NaN	NaN	25.8407	NaN	NaN	NaN	NaN	NaN	NaN	28.4984	28.5814	26.5547	28.5937	36	36	51.7	116.97	0	323.31	9796200000	133
DERPT_G5966	Full=Eukaryotic translation initiation factor 3 subunit B Short=eIF3b ame: Full=Eukaryotic translation initiation factor 3 subunit 9 nucleoplasm,extracellular exosome,translation preinitiation complex,eukaryotic translation initiation factor 3 complex, eIF	7	4	NaN	NaN	NaN	24.9214	27.9096	28.267	28.0457	27.2559	26.2723	24.2733	NaN	NaN	NaN	NaN	NaN	NaN	NaN	NaN	NaN	NaN	27.1554	27.6355	26.5988	27.1907	36	36	60	85.337	0	323.31	9613600000	134
DERPT_G3555	Full=Amidophosphoribosyltransferase Short=ATase ame: Full=Glutamine phosphoribosylpyrophosphate amidotransferase Short=GPATase Flags: Precursor amidophosphoribosyltransferase activity,binding,embryonic development via the syncytial blastoderm,determination	9	4	23.4595	NaN	24.8559	26.6579	28.0229	28.8794	27.1782	26.4425	25.9943	22.542	NaN	NaN	NaN	NaN	NaN	NaN	NaN	NaN	NaN	NaN	27.1666	26.901	27.5229	27.0455	29	29	64.3	65.795	0	323.31	9539200000	151
DERPT_G5674	Full=Fatty acid synthase Includes: ame: Full=[Acyl-carrier- ] S-acetyltransferase Includes: ame: Full=[Acyl-carrier- ] S-malonyltransferase Includes: ame: Full=3-oxoacyl-[acyl-carrier- ] synthase Includes: ame: Full=3-oxoacyl-[acyl-carrier- ] reductase Inc	5	4	NaN	NaN	NaN	NaN	NaN	NaN	NaN	NaN	24.629	24.7534	NaN	25.8468	27.4895	24.2823	NaN	NaN	NaN	NaN	NaN	NaN	27.0719	28.2812	24.9812	29.5309	80	80	48.5	281.23	0	323.31	9517100000	188
DERPT_G7646	Full=Pyruvate carboxylase ame: Full=Pyruvic carboxylase Short=PCB mitochondrial inner membrane,mitochondrial matrix,cytosol,DNA binding,biotin carboxylase activity,pyruvate carboxylase activity,ATP binding,biotin binding,metal ion binding,pyruvate metaboli	10	4	22.9736	20.4861	28.8689	29.0113	25.3705	23.309	NaN	NaN	20.3145	NaN	24.5223	23.0274	22.0339	NaN	NaN	NaN	NaN	NaN	NaN	NaN	26.9799	28.1369	23.1721	27.3714	57	57	63.7	133.43	0	323.31	9500500000	182
DERPT_G6847	Allergen Homolog (For t2): Full=Eukaryotic translation initiation factor 3 subunit I Short=eIF3i ame: Full=Eukaryotic translation initiation factor 3 subunit 2 ame: Full=TRIP-1 homolog cytosol,microtubule associated complex,extracellular exosome,translatio	7	4	NaN	NaN	23.9952	25.8141	27.684	27.5376	28.4209	28.0735	25.8162	NaN	NaN	NaN	NaN	NaN	NaN	NaN	NaN	NaN	NaN	NaN	27.0097	26.9833	26.6858	27.361	19	19	86.8	38.547	0	323.31	9451200000	116
DERPT_G6344	Full=Alpha-N-acetylgalactosaminidase ame: Full=Alpha-galactosidase B Flags: Precursor extracellular space,cell wall,lysosome,alpha-galactosidase activity,protein binding,bone mineralization,negative regulation of nitric oxide biosynthetic process,glycosylc	6	4	NaN	NaN	23.1365	27.2494	28.5256	28.8876	28.3225	26.0578	NaN	NaN	NaN	NaN	NaN	NaN	NaN	NaN	NaN	NaN	NaN	NaN	26.7281	26.722	26.2044	26.93	21	19	63.4	50.579	0	323.31	9390200000	138
DERPT_G5668	Full=Pyruvate dehydrogenase E1 component subunit beta cell wall,mitochondrial inner membrane,plasma membrane,mitochondrial alpha-ketoglutarate dehydrogenase complex,alpha-ketoacid dehydrogenase activity,3-methyl-2-oxobutanoate dehydrogenase (2-methylpropan	7	4	NaN	23.5386	25.7522	26.7216	26.7285	28.843	27.0992	22.4436	NaN	NaN	NaN	NaN	NaN	NaN	NaN	NaN	NaN	NaN	NaN	NaN	27.5754	27.6602	26.1089	27.3266	18	18	62	40.441	0	323.31	8392800000	93
DERPT_G11216	Full=Fatty acid synthase Includes: ame: Full=[Acyl-carrier- ] S-acetyltransferase Includes: ame: Full=[Acyl-carrier- ] S-malonyltransferase Includes: ame: Full=3-oxoacyl-[acyl-carrier- ] synthase Includes: ame: Full=3-oxoacyl-[acyl-carrier- ] reductase Inc	13	4	NaN	NaN	29.9937	26.2565	24.5449	25.4386	26.4986	25.5943	NaN	23.1252	23.55	23.272	24.3138	NaN	NaN	24.4003	NaN	25.5789	25.5716	NaN	26.2661	27.0002	25.8211	27.457	96	96	41.4	357.92	0	323.31	8231200000	214
DERPT_G4258	Full=Fatty acid oxidation complex subunit alpha Includes: ame: Full=Enoyl- hydratase 3-hydroxybutyryl- epimerase Includes: ame: Full=3-hydroxyacyl- dehydrogenase mitochondrial inner membrane,mitochondrial fatty acid beta-oxidation multienzyme complex,extra	13	4	27.2773	23.8165	21.7064	21.8626	NaN	NaN	NaN	23.1187	NaN	NaN	25.5183	25.5105	26.2595	27.0269	26.3302	24.6528	24.544	NaN	24.3905	NaN	27.4047	28.5171	25.9002	27.8144	40	40	59.3	89.489	0	323.31	8126600000	144
DERPT_G5443	Full=5-oxoprolinase ame: Full=5-oxo-L-prolinase Short=5-OPase ame: Full=Pyroglutamase cytosol,plasmodesma,5-oxoprolinase (ATP-hydrolyzing) activity,glutathione catabolic process	7	4	22.5025	22.3543	27.1439	28.3359	27.2514	25.8221	NaN	NaN	NaN	NaN	NaN	NaN	23.769	NaN	NaN	NaN	NaN	NaN	NaN	NaN	27.447	27.6054	26.6225	27.3243	47	47	54.2	140.94	0	323.31	7872500000	188
DERPT_G5631	---NA---	9	4	NaN	NaN	NaN	NaN	NaN	NaN	NaN	NaN	NaN	27.1817	30.1611	29.3255	28.337	27.0875	27.2101	26.0666	23.9242	NaN	NaN	26.556	25.0086	24.9371	25.8105	24.2832	15	15	42.1	26.116	0	323.31	7840400000	85
DERPT_G7634	Full=Histone-lysine N-methyltransferase setd3 ame: Full=SET domain-containing 3 nuclear chromatin,mitochondrion,extracellular exosome,RNA polymerase II activating transcription factor binding,transcription coactivator activity,arginase activity,histone met	10	4	NaN	NaN	26.2229	29.1492	27.3429	23.7552	NaN	24.4333	28.016	26.3256	24.5752	25.4552	25.4055	NaN	NaN	NaN	NaN	NaN	NaN	NaN	26.4234	26.973	25.0337	26.5617	37	37	56.7	91.105	0	323.31	7765200000	126
DERPT_G4269	Full=UDP-glucose:glyco glucosyltransferase Short=UGT Short=dUGT ame: Full=UDP--Glc:glyco glucosyltransferase Flags: Precursor nuclear envelope,endoplasmic reticulum lumen,rough endoplasmic reticulum,endoplasmic reticulum-Golgi intermediate compartment,UDP-	8	4	NaN	NaN	22.5839	24.2913	25.7843	29.4987	25.8732	21.8283	NaN	NaN	NaN	22.8362	22.9326	NaN	NaN	NaN	NaN	NaN	NaN	NaN	26.8879	27.4509	23.3588	26.9675	60	60	44.2	187.34	0	323.31	7428500000	157
DERPT_G9788	Full=Delta-aminolevulinic acid dehydratase Short=ALAD Short=ALADH ame: Full=Porphobilinogen synthase nucleus,cytoplasm,extracellular region part,porphobilinogen synthase activity,zinc ion binding,identical protein binding,heme biosynthetic process,response	6	4	NaN	NaN	26.0438	26.438	29.1206	27.8479	25.0194	24.5938	NaN	NaN	NaN	NaN	NaN	NaN	NaN	NaN	NaN	NaN	NaN	NaN	26.0677	25.9747	27.1391	25.9848	17	17	70.5	38.04	0	323.31	7268600000	97
DERPT_G7786	Full=Enoyl- nucleus,mitochondrion,microtubule associated complex,chloroplast,signaling receptor binding,copper ion binding,ATP binding,enoyl-[acyl-carrier-protein] reductase activity,fatty acid biosynthetic process,aerobic respiration,pronephric nephron tu	4	4	NaN	NaN	NaN	NaN	NaN	NaN	26.8999	28.2775	26.1301	NaN	NaN	NaN	NaN	NaN	NaN	NaN	NaN	NaN	24.6045	NaN	27.0095	27.1898	27.2367	27.3143	19	19	68.2	39.875	0	323.31	6958700000	79
DERPT_G8000	Full=Fatty acid synthase Includes: ame: Full=[Acyl-carrier- ] S-acetyltransferase Includes: ame: Full=[Acyl-carrier- ] S-malonyltransferase Includes: ame: Full=3-oxoacyl-[acyl-carrier- ] synthase Includes: ame: Full=3-oxoacyl-[acyl-carrier- ] reductase Inc	10	4	24.2837	NaN	24.1315	22.5376	NaN	NaN	NaN	NaN	NaN	NaN	20.9534	25.1704	25.4105	24.4747	24.9328	25.4137	24.7502	NaN	NaN	NaN	25.4475	27.4069	21.8938	29.2	81	81	40.9	306.03	0	323.31	6659800000	159
DERPT_G11125	Allergen homolog (Hev b HSP80): Full=Endoplasmin ame: Full=94 kDa glucose-regulated Short=GRP-94 ame: Full=Heat shock 90 kDa beta member 1 Flags: Precursor cell wall,nucleus,polytene chromosome interband,mitochondrion,vacuolar membrane,endoplasmic reticulu	12	4	25.2257	NaN	24.2604	24.5923	25.4592	26.5499	26.9149	26.3214	27.4062	26.3954	24.9832	24.3502	23.4425	NaN	NaN	NaN	NaN	NaN	NaN	NaN	26.7778	26.2004	26.3296	27.5839	38	36	42	101.81	0	323.31	6453900000	134
DERPT_G5361	Full=Succinate-semialdehyde mitochondrial ame: Full=Aldehyde dehydrogenase family 5 member A1 ame: Full=NAD(+)-dependent succinic semialdehyde dehydrogenase Flags: Precursor mitochondrial matrix,chloroplast stroma,aldehyde dehydrogenase (NAD) activity,succ	6	4	NaN	NaN	27.037	27.8129	27.4493	27.7819	25.9213	NaN	NaN	NaN	22.8176	NaN	NaN	NaN	NaN	NaN	NaN	NaN	NaN	NaN	26.3199	25.9502	27.1206	26.1022	25	25	51.1	60.287	0	323.31	6201100000	120
DERPT_G5277	Full=Pancreatic triacylglycerol lipase Short=PL Short=PTL Short=Pancreatic lipase Flags: Precursor extracellular region,protein binding,ATP binding,lipase activity,ATPase activity,metal ion binding,carboxylic ester hydrolase activity,glycerophospholipid me	8	4	NaN	22.1604	20.7542	21.7407	24.1458	29.2207	27.8487	24.0444	21.1989	NaN	NaN	NaN	NaN	NaN	NaN	NaN	NaN	NaN	NaN	NaN	26.4911	26.2736	26.1723	25.5951	26	26	12.9	270.68	0	323.31	6154400000	96
DERPT_G1392	Full=Chitosanase Flags: Precursor extracellular region,chitosanase activity,carbohydrate metabolic process,amino sugar metabolic process	4	4	NaN	NaN	NaN	NaN	NaN	NaN	NaN	NaN	24.9258	29.5027	28.835	25.965	NaN	NaN	NaN	NaN	NaN	NaN	NaN	NaN	25.8789	25.8787	24.5327	26.5286	27	27	75.4	29.231	0	323.31	5913100000	95
DERPT_G4888	Full=T-complex 1 subunit eta Short=TCP-1-eta ame: Full=CCT-eta zona pellucida receptor complex,mitochondrion,chaperonin-containing T-complex,microtubule,cell body,extracellular exosome,ATP binding,identical protein binding,protein binding involved in prote	15	4	27.3133	29.0441	28.5226	26.112	24.3372	22.2225	22.1603	NaN	25.9303	NaN	NaN	23.452	24.4393	26.0962	25.6492	24.1844	23.9815	25.741	NaN	NaN	25.6985	27.3481	24.3179	26.4962	33	33	46.6	92.924	0	323.31	5549900000	132
DERPT_G9825	Full=Cell cycle control 50A ame: Full=P4-ATPase flippase complex beta subunit TMEM30A ame: Full=Transmembrane 30A nucleoplasm,cytosol,plasma membrane,endomembrane system,cytoplasmic vesicle,UDP-N-acetylglucosamine diphosphorylase activity,UTP:glucose-1-pho	5	4	NaN	NaN	NaN	NaN	NaN	NaN	22.7573	26.6298	28.2604	26.487	23.3901	NaN	NaN	NaN	NaN	NaN	NaN	NaN	NaN	NaN	26.6296	26.8385	26.8437	26.3992	26	26	9.4	327.24	0	323.31	5432200000	90
DERPT_G3752	Full=Serine threonine- phosphatase CPPED1 ame: Full=Calcineurin-like phosphoesterase domain-containing 1 cytoplasm,plasma membrane,extracellular exosome,hydrolase activity	3	4	NaN	NaN	NaN	NaN	NaN	NaN	NaN	NaN	27.8123	28.0446	25.7343	NaN	NaN	NaN	NaN	NaN	NaN	NaN	NaN	NaN	26.5492	25.9528	26.8911	26.115	16	16	53.5	45.48	0	323.31	4943600000	60
DERPT_G7154	Full=26S proteasome non-ATPase regulatory subunit 2 nucleoplasm,endoplasmic reticulum,plasma membrane,proteasome regulatory particle, base subcomplex,plasmodesma,proteasome storage granule,extracellular exosome,endopeptidase activity,enzyme regulator activ	9	4	NaN	NaN	26.6611	29.0024	26.553	25.4807	24.0691	21.5691	NaN	NaN	NaN	NaN	23.969	23.6863	24.0895	NaN	NaN	NaN	NaN	NaN	25.1812	26.5	24.4714	25.7115	33	33	48.5	103.67	0	323.31	4819500000	106
DERPT_G9053	Full=Mitochondrial presequence protease Flags: Precursor mitochondrial intermembrane space,metalloendopeptidase activity,metal ion binding,proteolysis involved in cellular protein catabolic process	7	4	NaN	NaN	NaN	22.5689	22.5051	24.9631	27.6958	26.9183	21.8401	NaN	23.8121	NaN	NaN	NaN	NaN	NaN	NaN	NaN	NaN	NaN	26.4418	26.7919	25.3303	26.5371	39	39	48.2	123.9	0	323.31	4732400000	118
DERPT_G5522	Full=Neurogenic locus notch homolog 1 Short=Notch 1 Contains: ame: Full=Notch 1 extracellular truncation Short=NEXT Contains: ame: Full=Notch 1 intracellular domain Short=NICD Flags: Precursor plasma membrane,endomembrane system,extracellular matrix,cytopl	15	4	26.4248	28.3355	29.1262	25.2666	24.9281	25.324	24.1475	22.9643	22.5138	22.9498	22.7582	23.6622	NaN	23.568	24.2572	22.6609	NaN	NaN	NaN	NaN	24.7218	23.2107	26.1437	24.2375	88	88	21.4	698.47	0	323.31	3750800000	156
DERPT_G8302	Full= nucleic acid deglycase DJ-1 ame: Full=Maillard deglycase ame: Full=Parkinson disease 7 homolog ame: Full=Parkinsonism-associated deglycase ame: Full= DJ-1 Short=DJ-1 Flags: Precursor chromatin,mitochondrial respiratory chain complex I,mitochondrial i	5	4	NaN	NaN	NaN	NaN	NaN	NaN	NaN	24.1996	28.1983	27.1345	24.7717	NaN	23.546	NaN	NaN	NaN	NaN	NaN	NaN	NaN	25.8854	23.8937	27.0151	24.2484	16	16	70	24.455	0	323.31	3140400000	60
DERPT_G3562	783904EAT37868.1 AAEL010188-PA	5	4	NaN	NaN	NaN	23.3342	23.5998	NaN	NaN	26.4483	25.5809	24.129	NaN	NaN	NaN	NaN	NaN	NaN	NaN	NaN	NaN	NaN	24.559	24.6804	25.0671	25.2165	13	12	56.5	41.508	0	323.31	1694800000	37
DERPT_G3623	Full=Probable acyl- dehydrogenase fadE25 cell wall,mitochondrial matrix,cytosol,plasma membrane,mitochondrial membrane,intracellular non-membrane-bounded organelle,fatty-acyl-CoA binding,acyl-CoA dehydrogenase activity,electron transfer activity,flavin ade	4	4	NaN	NaN	NaN	23.3237	24.9805	27.6111	25.0008	NaN	NaN	NaN	NaN	NaN	NaN	NaN	NaN	NaN	NaN	NaN	NaN	NaN	26.9333	26.7864	26.598	26.9338	24	24	57.5	46.991	0	322.53	4749400000	81
DERPT_G6402	Full=T-complex 1 subunit delta Short=TCP-1-delta ame: Full=CCT-delta zona pellucida receptor complex,nucleoplasm,centrosome,chaperonin-containing T-complex,microtubule,cilium,melanosome,cell body,extracellular exosome,ATP binding,protein binding involved i	10	4	27.5068	28.7305	28.3166	25.5165	22.8698	22.8076	21.4004	21.7295	23.0202	NaN	NaN	NaN	NaN	21.7226	NaN	NaN	NaN	NaN	NaN	NaN	25.2626	27.8706	24.1667	27.5272	33	33	70.1	57.479	0	319.86	5856900000	126
DERPT_G10427	Full=Cyanate hydratase Short=Cyanase ame: Full=Cyanate hydrolase ame: Full=Cyanate lyase DNA binding,cyanate hydratase activity,cyanate metabolic process	6	4	NaN	NaN	26.6538	26.9895	27.674	29.0606	26.4066	23.9914	NaN	NaN	NaN	NaN	NaN	NaN	NaN	NaN	NaN	NaN	NaN	NaN	26.9018	26.5483	27.3116	26.1311	13	13	57.1	22.555	0	318.71	7383300000	54
DERPT_G683	Full=Alpha-tectorin Flags: Precursor extracellular region,membrane,cell part,binding,cell-matrix adhesion,multicellular organismal process,cellular process,developmental process,negative regulation of cellular process,anatomical structure development	9	4	28.6757	21.86	23.6612	21.1271	NaN	27.9242	27.1897	21.5275	NaN	NaN	NaN	NaN	22.3214	NaN	NaN	NaN	NaN	24.024	NaN	NaN	28.4143	28.6586	27.097	28.4092	52	52	50.4	134.3	0	315.22	11071000000	198
DERPT_G4118	Full=Nucleoside diphosphate kinase Short=NDK Short=NDP kinase nucleus,mitochondrial outer membrane,centrosome,cytosol,microtubule,microtubule associated complex,intermediate filament,focal adhesion,lamellipodium,ruffle membrane,myelin sheath,perinuclear re	20	4	24.3989	24.1636	25.4742	25.3051	26.1453	28.2443	32.132	32.19	30.246	28.2823	26.4458	25.775	26.0753	26.3733	26.7844	28.1693	28.3968	27.714	28.0579	26.9263	29.7909	28.7035	29.7802	28.9057	20	20	91.6	17.556	0	315.03	80261000000	253
DERPT_G7209	Full= ferric-chelate reductase 1 membrane,oxidoreductase activity	12	4	NaN	NaN	NaN	NaN	NaN	NaN	NaN	NaN	25.7856	28.2624	30.164	29.5038	28.9971	28.665	27.806	27.5461	28.4676	27.8018	28.2485	27.4104	27.584	27.2304	28.0926	27.2507	20	20	86.3	17.378	0	314.86	13991000000	116
DERPT_G1568	Full=Alpha-aminoadipic semialdehyde mitochondrial ame: Full=LKR SDH Includes: ame: Full=Lysine ketoglutarate reductase Short=LKR Short=LOR Includes: ame: Full=Saccharopine dehydrogenase Short=SDH Flags: Precursor mitochondrion,membrane,transcriptional repr	10	4	24.646	NaN	28.841	29.2834	25.6146	22.9823	NaN	NaN	NaN	NaN	NaN	23.0527	23.258	22.9745	23.6684	24.3736	NaN	NaN	NaN	NaN	28.4544	28.1291	24.7782	28.7634	43	43	24.7	262.99	0	314.64	11197000000	183
DERPT_G11365	Full=Sarcoplasmic endoplasmic reticulum calcium ATPase 1 Short=SERCA1 Short=SR Ca(2+)-ATPase 1 ame: Full=Calcium pump 1 ame: Full=Calcium-transporting ATPase sarcoplasmic reticulum fast twitch skeletal muscle isoform ame: Full=Endoplasmic reticulum class 1	11	4	24.7321	NaN	NaN	NaN	NaN	NaN	NaN	NaN	24.7074	25.6832	24.223	25.3197	27.5208	27.9715	27.9969	25.5948	26.1739	25.6193	NaN	NaN	27.3619	28.6419	26.3531	28.1121	36	36	36.1	120.44	0	314.44	7549500000	149
DERPT_G182	Full=Endopolyphosphatase extracellular region,lysosome,vesicle,membrane part,lytic vacuole membrane,sphingomyelin phosphodiesterase activity,binding,sphingomyelin catabolic process,negative regulation of signal transduction,regulation of defense response,s	16	4	NaN	NaN	NaN	NaN	23.3705	26.4179	29.661	29.4865	27.5336	25.6366	24.1366	24.9802	26.007	26.8054	26.4495	27.3917	27.9649	27.4368	27.6626	27.062	29.0343	28.377	29.2322	28.8593	29	29	53.9	71.701	0	313.45	24362000000	171
DERPT_G5473	Full=Glycine cleavage system H basement membrane,mitochondrion,glycine cleavage complex,aminomethyltransferase activity,glycine dehydrogenase (decarboxylating) activity,extracellular matrix structural constituent,ATP binding,enzyme binding,glycine decarbox	7	4	NaN	NaN	NaN	NaN	NaN	NaN	NaN	25.1645	26.6335	28.9214	27.9535	28.0093	26.1516	26.3381	NaN	NaN	NaN	NaN	NaN	NaN	28.8835	28.6649	29.4899	28.4	7	7	54.7	15.662	0	312.67	16134000000	62
DERPT_G1015	Full=Leukocyte elastase inhibitor ame: Full=Serpin B1 extracellular space,cytoplasm,membrane,extracellular vesicle,binding,regulation of blood coagulation,regulation of protein catabolic process,multicellular organismal process,negative regulation of prote	4	4	NaN	NaN	NaN	NaN	NaN	24.9901	24.2726	27.222	26.6988	NaN	NaN	NaN	NaN	NaN	NaN	NaN	NaN	NaN	NaN	NaN	26.746	25.4636	27.0769	28.0957	16	16	49.3	47.422	0	308.46	5554900000	56
DERPT_G10458	Full=Apolipophorins Contains: ame: Full=Apolipophorin-2 ame: Full=Apolipophorin II ame: Full=apoLp-2 Contains: ame: Full=Apolipophorin-1 ame: Full=Apolipophorin I ame: Full=apoLp-1 Flags: Precursor lipid transporter activity,lipid transport	9	4	27.0942	25.1088	23.3206	24.3654	NaN	NaN	25.1848	26.6168	26.2804	24.2353	NaN	NaN	NaN	NaN	24.968	NaN	NaN	NaN	NaN	NaN	26.7544	26.7804	26.7099	27.3276	54	54	25.1	359.36	0	307.8	5273100000	138
DERPT_G7292	Full=Beta-mannosidase A ame: Full=Mannanase A Short=Mannase A Flags: Precursor extracellular space,nuclear speck,motile cilium,cytoplasmic part,obsolete transcription factor activity, RNA polymerase II transcription factor binding,proximal promoter DNA-bin	4	4	NaN	NaN	NaN	NaN	23.3361	24.6488	27.208	25.9704	NaN	NaN	NaN	NaN	NaN	NaN	NaN	NaN	NaN	NaN	NaN	NaN	27.4351	26.8495	28.0199	27.0728	30	30	16.4	255.94	0	306.37	6423800000	96
DERPT_G8495	Full=Integrin alpha-8 Contains: ame: Full=Integrin alpha-8 heavy chain Contains: ame: Full=Integrin alpha-8 light chain Flags: Precursor focal adhesion,integrin complex,basal plasma membrane,cell surface,endomembrane system,cell projection membrane,vesicle	6	4	29.3397	24.5753	23.8846	NaN	NaN	NaN	23.7618	23.4723	NaN	NaN	NaN	22.7296	NaN	NaN	NaN	NaN	NaN	NaN	NaN	NaN	26.0482	26.9152	25.4919	26.0553	33	33	27.7	187.78	0	305.63	3436400000	83
DERPT_G3124	Full=Phosphoenolpyruvate carboxykinase mitochondrial matrix,cytosol,extracellular exosome,magnesium ion binding,nucleoside diphosphate kinase activity,phosphoenolpyruvate carboxykinase (GTP) activity,protein kinase activity,ATP binding,GTP binding,GDP bind	14	4	24.8225	NaN	23.7147	23.8776	23.0843	23.6982	25.6653	27.4699	26.1641	25.5984	24.2734	27.7573	29.397	28.2944	26.3314	NaN	NaN	NaN	NaN	NaN	28.8229	30.0492	26.8431	29.487	42	42	38.9	126.49	0	304.64	20445000000	203
DERPT_G9802	Allergen Homolog (Der f30): Full=Ferritin heavy chain Short=Ferritin H subunit Contains: ame: Full=Ferritin heavy N-terminally processed ferric iron binding,oxidoreductase activity,iron ion transport,cellular iron ion homeostasis,immune response,negative r	16	4	28.5956	30.7953	32.7884	33.1773	31.745	28.9669	25.9774	22.4382	21.7519	NaN	NaN	20.228	NaN	23.8523	21.946	24.6855	23.5438	24.6911	25.8044	NaN	30.419	29.3654	30.8216	29.2642	19	19	29.4	48.966	0	303.82	107330000000	236
DERPT_G3422	--NA--	12	4	31.5919	32.3459	31.1941	30.3044	29.8141	29.811	27.7392	25.1553	NaN	NaN	NaN	NaN	NaN	25.4109	NaN	NaN	22.4071	22.9794	NaN	22.5467	26.6002	25.4385	26.8646	26.3432	21	21	74.6	23.813	0	302.92	26233000000	165
DERPT_G5612	Full=Calcium calmodulin-dependent kinase type II subunit delta Short= kinase II subunit delta Short= -II subunit delta nucleus,mitochondrion,microtubule organizing center,cytosol,calcium- and calmodulin-dependent protein kinase complex,postsynaptic density	10	4	NaN	26.6967	26.0619	27.0445	27.6613	26.6579	25.2169	25.4546	27.4967	27.2301	24.8108	NaN	NaN	NaN	NaN	NaN	NaN	NaN	NaN	NaN	26.7406	26.2078	27.3102	26.6554	19	19	37.7	69.756	0	301.16	6740000000	100
DERPT_G8505	Full=Glutathione hydrolase 1 proenzyme ame: Full=Gamma-glutamyltransferase 1 ame: Full=Gamma-glutamyltranspeptidase 1 Short=GGT 1 ame: Full=Leukotriene-C4 hydrolase ame: CD_antigen=CD224 Contains: ame: Full=Glutathione hydrolase 1 heavy chain Contains: ame	9	4	28.1994	25.1884	26.4654	26.1851	22.8068	27.5753	29.2532	28.0221	24.2899	NaN	NaN	NaN	NaN	NaN	NaN	NaN	NaN	NaN	NaN	NaN	27.36	27.0327	27.5533	27.0134	27	27	45.5	68.847	0	299.38	10533000000	159
DERPT_G8668	Full=Succinyl-diaminopimelate desuccinylase Short=SDAP desuccinylase ame: Full=N-succinyl-LL-2,6-diaminoheptanedioate amidohydrolase nucleoplasm,mitochondrion,cytosol,ribosome,extracellular exosome,omega peptidase activity,zinc ion binding,metallodipeptida	12	4	24.7202	23.4817	19.5792	20.7439	NaN	22.2571	24.214	25.1678	27.8473	27.1967	23.6346	NaN	23.151	23.6744	NaN	NaN	NaN	NaN	NaN	NaN	27.6027	27.1451	26.9212	28.1385	25	25	63.2	53.216	0	299.09	7125200000	130
DERPT_G10897	---NA---	18	4	22.132	NaN	22.3623	23.8803	NaN	25.4102	30.2808	31.2703	29.5532	27.8033	26.9385	26.9335	26.6262	27.0271	27.5144	28.227	27.9981	27.2602	27.1629	25.3404	23.9795	23.9978	26.7225	23.7897	13	13	65.5	13.116	0	299.06	24308000000	103
DERPT_G3769	Full=Nucleosome assembly 1-like 4 nucleus,membrane,cytoplasmic part,cell periphery,neuron part,nucleic acid binding,protein binding,zinc ion binding,DNA repair,DNA recombination,nucleosome assembly,DNA integration,cell differentiation,positive regulation o	18	4	26.047	24.7015	26.1599	26.66	27.4171	28.9759	29.9981	28.2591	25.6838	23.9732	NaN	23.6707	26.1337	27.317	24.9474	25.4862	27.3937	24.9855	NaN	23.7712	27.5799	27.2493	25.0843	28.0141	22	22	9.8	229.5	0	298.89	16464000000	136
DERPT_G8894	Allergen Homolog (Tyr p33, Lep d): Full=Tubulin alpha-1B chain ame: Full=Alpha-tubulin ubiquitous ame: Full=Tubulin K-alpha-1 ame: Full=Tubulin alpha-ubiquitous chain Contains: ame: Full=Detyrosinated tubulin alpha-1B chain astral microtubule,nucleus,lipi	14	4	29.2587	26.43	27.5061	27.6867	27.0612	27.5825	26.6384	25.7339	NaN	NaN	NaN	25.1409	26.0723	26.9439	26.291	24.4522	NaN	24.0602	NaN	NaN	28.6652	29.128	27.8442	28.8466	23	9	61.3	50.054	0	296.69	17943000000	154
DERPT_G5915	Full=Beta-hexosaminidase subunit alpha ame: Full=Beta-N-acetylhexosaminidase subunit alpha Short=Hexosaminidase subunit A ame: Full=N-acetyl-beta-glucosaminidase subunit alpha Flags: Precursor acrosomal vesicle,extracellular space,cell wall,lysosome,membra	9	4	25.4514	22.9172	26.0568	25.8263	27.2883	29.8954	27.7167	22.9632	22.4615	NaN	NaN	NaN	NaN	NaN	NaN	NaN	NaN	NaN	NaN	NaN	26.5497	25.6516	26.7297	25.9414	20	20	36.3	66.555	0	294.1	8685900000	106
DERPT_G707	Full=Chitinase Flags: Precursor extracellular region,chitin binding,carbohydrate metabolic process,chitin metabolic process	8	4	NaN	NaN	NaN	NaN	NaN	22.8077	22.7056	26.0626	27.5777	26.2481	25.1163	24.4363	23.4807	NaN	NaN	NaN	NaN	NaN	NaN	NaN	28.1558	26.8225	28.6908	27.1362	18	18	54.6	45.837	0	293.53	8732500000	89
DERPT_G3141	Full=Alcohol dehydrogenase nucleus,mitochondrion,cytosol,apical plasma membrane,extracellular exosome,retinal dehydrogenase activity,alditol:NADP+ 1-oxidoreductase activity,estradiol 17-beta-dehydrogenase activity,protein binding,oxidoreductase activity, a	17	4	24.0134	NaN	21.4946	NaN	22.6621	22.7337	23.8903	25.0096	28.9308	29.3057	27.573	24.9885	24.908	25.2631	23.2141	23.6204	25.3612	23.9227	24.3434	NaN	28.4019	27.8246	26.5705	28.2752	30	30	81.1	36.158	0	293.16	12067000000	135
DERPT_G4865	Full=Ester hydrolase C11orf54 homolog nucleus,hydrolase activity, acting on ester bonds	5	4	NaN	NaN	NaN	NaN	NaN	NaN	NaN	24.3317	28.7395	27.9832	27.2006	24.3641	NaN	NaN	NaN	NaN	NaN	NaN	NaN	NaN	28.4732	28.2218	28.757	27.9037	20	20	69	36.237	0	291.99	12438000000	109
DERPT_G6879	Full=T-complex 1 subunit beta Short=TCP-1-beta ame: Full=CCT-beta zona pellucida receptor complex,cell wall,mitochondrion,chaperonin-containing T-complex,microtubule,extracellular matrix,myelin sheath,cell body,anchored component of plasma membrane,extrace	15	4	29.9208	33.0574	32.0185	29.3594	26.99	25.8183	25.098	26.1179	28.3139	27.4821	NaN	28.347	26.6295	26.221	NaN	NaN	NaN	28.6433	NaN	36.1498	30.3835	30.8841	29.005	31.3201	37	37	83.1	59.109	0	290.47	10864000000	141
DERPT_G8251	Full=Serine threonine- phosphatase 2A catalytic subunit alpha isoform Short=PP2A-alpha protein phosphatase type 2A complex,chromosome, centromeric region,spindle pole,nucleoplasm,nucleolus,centriole,cytosol,plasma membrane,postsynaptic density,neuronal cel	1	4	23.2942	NaN	NaN	NaN	NaN	NaN	NaN	NaN	NaN	NaN	NaN	NaN	NaN	NaN	NaN	NaN	NaN	NaN	NaN	NaN	27.3975	27.3197	27.867	27.3104	16	14	61.9	42.802	0	289.79	5846200000	71
DERPT_G7559	Full=Cystatin Flags: Precursor cysteine-type endopeptidase inhibitor activity	15	4	NaN	NaN	NaN	NaN	NaN	23.7297	25.7569	25.8569	29.4793	30.4146	31.328	32.3485	31.659	29.1862	29.0271	27.8944	27.9883	27.1684	27.0036	27.1766	29.6704	29.0121	30.1527	29.0946	9	9	72.6	13.553	0	288.25	55874000000	88
DERPT_G9352	Full=Clathrin heavy chain 1 mitochondrion,vacuolar membrane,trans-Golgi network,lipid droplet,cytosol,focal adhesion,cell cortex,synaptic vesicle,plasmodesma,chloroplast,cytoplasmic side of plasma membrane,apical plasma membrane,clathrin coat of trans-Golg	2	4	NaN	NaN	NaN	NaN	NaN	NaN	NaN	NaN	NaN	NaN	NaN	NaN	26.2788	26.1088	NaN	NaN	NaN	NaN	NaN	NaN	26.804	27.5031	25.9604	27.2892	48	48	44.1	192.63	0	287.08	4548100000	130
DERPT_G11904	Full=S-formylglutathione hydrolase Short=FGH cytoplasm,apoplast,extracellular exosome,S-formylglutathione hydrolase activity,identical protein binding,formaldehyde catabolic process,response to cadmium ion,methane metabolic process	9	4	NaN	NaN	22.9228	23.7556	24.9781	26.2632	26.9346	28.9362	27.5322	24.8035	NaN	NaN	NaN	NaN	NaN	26.6891	NaN	NaN	NaN	NaN	27.9086	27.4026	27.6686	27.7699	15	15	69.4	33.014	0	283.24	11639000000	122
DERPT_G4276	Full=Peptidyl-glycine alpha-amidating monooxygenase Short=PAM Includes: ame: Full=Peptidylglycine alpha-hydroxylating monooxygenase Short=PHM Includes: ame: Full=Peptidyl-alpha-hydroxyglycine alpha-amidating lyase ame: Full=Peptidylamidoglycolate lyase Sho	5	4	NaN	NaN	NaN	NaN	NaN	NaN	23.9797	26.4235	28.6717	27.2636	24.097	NaN	NaN	NaN	NaN	NaN	NaN	NaN	NaN	NaN	27.281	26.3821	27.8489	26.5202	13	13	40.8	45.251	0	282.76	7294600000	56
DERPT_G9248	---NA---	17	4	23.9407	NaN	NaN	NaN	24.5025	25.1988	25.0039	26.0464	28.6626	29.5567	28.469	27.3005	26.8243	26.3009	27.1394	26.3714	27.9066	28.4675	27.5452	27.1634	25.8242	25.7448	26.3007	26.092	14	14	27.1	54.299	0	278.72	7633100000	82
DERPT_G8678	Full=Calponin-1 ame: Full=Basic calponin ame: Full=Calponin smooth muscle somatodendritic compartment,membrane-bounded organelle,intracellular organelle,cytoskeletal protein binding,cell adhesion,regulation of cell shape,negative regulation of cellular pro	20	4	27.6091	23.7517	23.6806	23.0816	23.2092	25.4037	21.4981	20.0743	24.9047	28.8041	32.0971	30.9229	29.8479	27.298	27.7862	27.6442	27.2097	26.2465	25.9909	24.0366	29.7798	29.2291	28.6906	29.0427	18	18	41.1	35.547	0	276.59	41247000000	195
DERPT_G5053	Der f31 like allergen: Full=Cofilin ame: Full=Actin-depolymerizing factor 1 nucleoplasm,cytosol,microtubule associated complex,actin filament,plasma membrane,actin cortical patch,actin filament binding,mitotic cytokinesis,actomyosin contractile ring assemb	20	4	25.9815	23.1435	24.4502	24.7033	24.0187	26.2779	26.2925	27.6153	28.6456	31.4891	32.1134	30.0877	28.6135	27.0274	25.926	23.7773	24.3017	26.3317	24.9225	26.5714	28.648	27.5526	27.8996	27.6495	21	21	89.2	16.845	0	275.91	39109000000	154
DERPT_G10515	Full=26S proteasome regulatory subunit 4 Short=P26s4 ame: Full=26S proteasome AAA-ATPase subunit RPT2 ame: Full=Proteasome 26S subunit ATPase 1 nucleoplasm,microtubule associated complex,plasma membrane,proteasome regulatory particle, base subcomplex,inclu	5	4	NaN	NaN	NaN	NaN	NaN	23.4451	23.0842	27.5073	27.0665	NaN	NaN	24.5853	NaN	NaN	NaN	NaN	NaN	NaN	NaN	NaN	25.4731	25.936	26.2201	25.8043	37	37	37	163.54	0	273.95	3847200000	99
DERPT_G9201	Full=Kininogen-1 Contains: ame: Full=Kininogen-1 heavy chain Contains: ame: Full=Bradykinin Contains: ame: Full=Kininogen-1 light chain Flags: Precursor cysteine-type endopeptidase inhibitor activity,response to stress,regulation of proteolysis,regulation	10	4	NaN	NaN	NaN	NaN	NaN	25.3601	26.4142	26.1611	26.8393	28.1744	28.6971	26.9255	23.4237	21.6522	21.8303	NaN	NaN	NaN	NaN	NaN	26.0442	27.2154	27.0773	26.7193	17	17	65.1	27.884	0	273.28	7120500000	135
DERPT_G8888	Full=Serine threonine- phosphatase PP1-beta catalytic subunit Short=PP-1B protein phosphatase type 1 complex,condensed chromosome kinetochore,nuclear chromosome, telomeric region,nuclear chromatin,polytene chromosome,nucleolus,mitochondrial outer membrane,	13	4	24.7419	23.6976	22.8018	22.755	24.2676	23.9293	23.6246	25.8056	26.9578	25.9621	23.1678	NaN	NaN	NaN	NaN	NaN	NaN	NaN	24.0556	25.7992	28.2293	27.7299	28.3118	28.0853	20	20	80.6	36.985	0	272.46	9679700000	110
DERPT_G1000	Full=Transmembrane 184C ame: Full=Transmembrane 34 nucleoplasm,mitochondrion,endoplasmic reticulum membrane,Golgi apparatus,actin cytoskeleton,proteasome core complex, beta-subunit complex,proteasome storage granule,extracellular exosome,threonine-type end	9	4	27.4953	30.2772	31.9501	29.2649	25.6773	23.4812	NaN	21.6808	21.6888	NaN	NaN	NaN	NaN	NaN	NaN	NaN	NaN	24.3996	NaN	NaN	28.0014	26.9897	28.7837	27.2827	17	17	20.6	64.433	0	271.29	23835000000	111
DERPT_G7455	Full=Valine--tRNA ligase ame: Full=Valyl-tRNA synthetase Short= mitochondrion,cytosol,chloroplast,aminoacyl-tRNA editing activity,valine-tRNA ligase activity,ATP binding,valyl-tRNA aminoacylation,embryo development ending in seed dormancy,isoleucine biosyn	8	4	22.4598	NaN	NaN	NaN	22.0027	26.4418	28.1382	22.4394	NaN	NaN	NaN	22.7343	23.7106	22.271	NaN	NaN	NaN	NaN	NaN	NaN	24.3069	26.3633	22.2043	25.4691	39	39	45.2	124.7	0	270.41	3334500000	92
DERPT_G11952	Allergen homolog (Der f34): Full=2-iminobutanoate 2-iminopropanoate deaminase ame: Full=Enamine imine deaminase nucleus,mitochondrion,vacuole,peroxisome,cytosol,chloroplast stroma,thylakoid,chloroplast envelope,integral component of membrane,endoribonuclea	13	4	NaN	NaN	NaN	NaN	NaN	NaN	NaN	24.1727	28.9804	31.014	29.8057	27.3658	26.6986	26.8571	26.7318	26.8495	26.576	26.7081	27.4955	27.0985	27.2135	26.5394	27.1832	26.1534	13	9	29.1	41.218	0	269.5	16828000000	97
DERPT_G311	Full=Succinate dehydrogenase cell wall,mitochondrial respiratory chain complex II, succinate dehydrogenase complex (ubiquinone),Golgi apparatus,myelin sheath,L-iditol 2-dehydrogenase activity,ATP binding,succinate dehydrogenase (ubiquinone) activity,electr	9	4	23.6794	NaN	NaN	NaN	NaN	NaN	NaN	NaN	24.8722	24.1851	NaN	NaN	24.4512	26.9281	27.8603	27.0598	25.7244	24.2159	NaN	NaN	26.921	28.1151	24.9956	27.3957	26	26	33.5	115.76	0	267.49	4574800000	86
DERPT_G8048	Full=40S ribosomal SA ame: Full=37 kDa laminin receptor precursor Short=37LRP ame: Full=37 67 kDa laminin receptor Short=LRP LR ame: Full=67 kDa laminin receptor Short=67LR ame: Full=Laminin receptor 1 Short= ame: Full=Laminin-binding precursor p40 Short=L	20	4	26.2423	24.5129	25.6922	25.7007	25.5889	26.3485	26.7674	27.1078	28.9967	28.8177	28.0474	27.9905	28.1027	27.8731	27.3605	28.2442	28.4929	28.6616	28.5631	28.3488	27.7764	27.2047	28.3151	27.5904	15	15	54.4	31.64	0	267.48	13196000000	152
DERPT_G11654	557651WP_011435424.1 MULTISPECIES: hypothetical protein [Frankia] ABD10356.1 hypothetical protein Francci3_0972 [Frankia casuarinae] EYT91680.1 hypothetical protein ThrDRAFT_02685	14	4	NaN	NaN	NaN	22.8184	22.9213	23.2744	25.4309	27.5635	29.8602	28.6242	25.8308	NaN	NaN	27.5695	28.531	26.9201	25.5897	24.4679	NaN	24.3618	24.8932	24.9052	25.3554	25.441	7	7	21.4	55.086	0	265.65	6149200000	51
DERPT_G5842	Full=Methionine aminopeptidase 2 Short=MAP 2 Short= 2 ame: Full=Peptidase M nucleoplasm,nucleolus,cytoplasm,membrane,ribonucleoprotein complex,extracellular exosome,DNA binding,DNA-binding transcription factor activity,RNA binding,exopeptidase activity,ubi	11	4	22.5472	22.0498	22.2194	22.4527	22.7472	25.0431	26.0601	27.86	29.2833	26.3578	22.4473	NaN	NaN	NaN	NaN	NaN	NaN	NaN	NaN	NaN	27.802	27.8782	26.2202	28.2206	21	21	61.6	45.798	0	265.57	11195000000	113
DERPT_G8138	Full=Acetylcholinesterase Short=A Flags: Precursor extracellular space,nuclear envelope,endoplasmic reticulum,plasma membrane,synapse,intracellular organelle lumen,neuron part,cholinesterase activity,protein binding,response to acid chemical,acetylcholine	4	4	NaN	NaN	NaN	NaN	NaN	24.9344	26.8642	26.6788	25.0249	NaN	NaN	NaN	NaN	NaN	NaN	NaN	NaN	NaN	NaN	NaN	26.885	27.0952	25.83	26.9879	22	22	32.8	119.41	0	265.45	4788400000	87
DERPT_G921	Allergen Homolog (Sola ISOD, Ole5): Full=Superoxide dismutase extracellular space,nucleus,mitochondrion,lysosome,peroxisome,cytosol,plasma membrane,chloroplast,extracellular matrix,cytoplasmic vesicle,dendrite cytoplasm,neuronal cell body,protein-containin	12	4	NaN	NaN	NaN	NaN	NaN	NaN	NaN	25.0034	29.0162	31.0001	28.2206	25.0625	24.3685	23.7845	NaN	23.2164	22.3775	23.3705	23.913	23.4198	26.7665	26.3587	26.5878	26.882	9	9	7.5	194.29	0	264.73	13735000000	83
DERPT_G3301	Full=Uncharacterized oxidoreductase membrane,intracellular membrane-bounded organelle,organelle part,cytoplasmic part,oxidoreductase activity, acting on the CH-OH group of donors, NAD or NADP as acceptor,cellular lipid metabolic process	7	4	23.8559	NaN	20.9934	NaN	NaN	NaN	NaN	26.3446	28.4675	24.8285	NaN	NaN	25.7953	25.989	NaN	NaN	NaN	NaN	NaN	NaN	28.2973	29.5572	26.9075	28.4511	12	12	65.3	25.974	0	263.17	13377000000	87
DERPT_G6075	Full=Galectin-4 Short=Gal-4 ame: Full=L-36 lactose-binding Short=L36LBP ame: Full=Lactose-binding lectin 4 extracellular matrix,nucleus,cytoplasm,cell surface,plasma membrane part,protein binding,carbohydrate binding,positive regulation of cytokine product	13	4	28.334	25.643	26.7313	25.3215	23.3469	23.6548	NaN	22.7438	22.7319	NaN	23.2212	24.2118	23.6143	NaN	NaN	24.5092	NaN	24.5293	NaN	NaN	26.9844	26.6497	26.8121	27.0282	17	17	65.9	38.685	0	263.08	4575200000	77
DERPT_G162	Full=Leukotriene A-4 hydrolase homolog Short=LTA-4 hydrolase ame: Full=Leukotriene A(4) hydrolase nucleus,cytoplasm,aminopeptidase activity,protein binding,metallopeptidase activity,zinc ion binding,ether hydrolase activity,proteolysis,leukotriene metaboli	5	4	NaN	NaN	NaN	NaN	NaN	23.589	27.2165	28.8096	26.3179	NaN	NaN	NaN	NaN	NaN	NaN	NaN	NaN	24.1829	NaN	NaN	28.2421	27.2401	28.5418	28.1305	37	37	60.1	83.394	0	261.63	11895000000	158
DERPT_G5444	Full=Protease 3 ame: Full=Pitrilysin ame: Full=Protease III ame: Full=Protease pi Flags: Precursor extracellular region,nucleus,mitochondrion,peroxisome,cytosol,plasma membrane,extrinsic component of membrane,intracellular organelle part,intracellular orga	8	4	24.4306	NaN	26.2689	28.0573	28.7774	27.3451	23.8073	NaN	NaN	NaN	NaN	24.064	23.3785	NaN	NaN	NaN	NaN	NaN	NaN	NaN	27.1399	27.1754	26.5462	28.0182	46	46	49.6	115.19	0	260.84	9743000000	183
DERPT_G3328	Full=Plasma membrane proteolipid 3 plasma membrane,integral component of membrane,protein binding	6	4	26.0815	NaN	27.2979	28.2309	28.3926	26.0295	23.6849	NaN	NaN	NaN	NaN	NaN	NaN	NaN	NaN	NaN	NaN	NaN	NaN	NaN	27.9789	28.0279	28.2993	27.8404	26	26	40.6	112.95	0	259.87	11793000000	139
DERPT_G8437	Full=Serine incorporator 5 endoplasmic reticulum,Golgi apparatus,membrane part,intracellular organelle part,phospholipid metabolic process,positive regulation of transferase activity,organonitrogen compound metabolic process	8	4	23.5846	NaN	23.4576	23.7377	NaN	NaN	23.6723	25.8176	26.5861	25.1516	24.0916	NaN	NaN	NaN	NaN	NaN	NaN	NaN	NaN	NaN	23.9012	24.3272	24.3899	23.7378	17	17	19.3	184.51	0	259.42	1628600000	53
DERPT_G3109	Full=Galectin-4 Short=Gal-4 ame: Full=L-36 lactose-binding Short=L36LBP ame: Full=Lactose-binding lectin 4 nucleus,cytoplasm,cell surface,extracellular matrix,plasma membrane part,protein binding,carbohydrate binding,positive regulation of cytokine product	13	4	22.3814	23.4031	21.5691	NaN	23.0466	21.7905	23.2797	24.3671	25.5852	28.299	28.6966	27.333	25.769	NaN	21.9844	NaN	NaN	NaN	NaN	NaN	27.7777	27.3497	28.4493	27.6444	21	21	61.8	44.306	0	259.41	9719500000	137
DERPT_G10493	Full=Aldo-keto reductase family 1 member C1 homolog ame: Full=20-alpha-hydroxysteroid dehydrogenase Short=20-alpha-HSD ame: Full=Dihydrodiol dehydrogenase 1 Short=DD-1 Short=DD1 ame: Full=Indanol dehydrogenase nucleus,mitochondrial matrix,lysosome,cytosol,	20	4	20.318	20.1719	21.4373	20.5239	19.423	21.6193	25.5963	30.4684	31.2649	29.3542	25.4119	22.5092	22.4979	23.3431	23.4362	25.5885	26.1951	25.6932	22.4357	23.5449	28.0793	27.6479	28.9076	28.3659	32	32	12	191.03	0	258.5	28194000000	201
DERPT_G1362	Allergen Homolog (Bla g Rack1): Full=Guanine nucleotide-binding subunit beta kinetochore,phagocytic cup,nuclear envelope,nucleolus,mitochondrion,autophagosome,centrosome,heterotrimeric G-protein complex,microtubule associated complex,cell-cell adherens jun	3	4	27.9396	NaN	NaN	NaN	NaN	NaN	NaN	NaN	NaN	NaN	NaN	NaN	25.3065	NaN	24.2356	NaN	NaN	NaN	NaN	NaN	26.8546	28.1093	26.4827	27.5864	23	23	84.1	36.445	0	258.36	6063000000	82
DERPT_G6903	Full=Ras-related Rab-7a fungal-type vacuole membrane,autophagosome membrane,nucleus,Golgi apparatus,lipid droplet,cytosol,plasma membrane,phagocytic vesicle membrane,retromer complex,late endosome membrane,extrinsic component of lysosome membrane,melanosom	5	4	NaN	NaN	NaN	NaN	NaN	NaN	NaN	23.9158	25.7858	28.4617	28.4156	26.606	NaN	NaN	NaN	NaN	NaN	NaN	NaN	NaN	24.2878	26.902	22.8779	26.0966	15	15	63.3	23.197	0	256.97	4674700000	46
DERPT_G583	Full=Acetylcholinesterase Short=A Flags: Precursor extracellular space,plasma membrane,endomembrane system,intracellular membrane-bounded organelle,cytoplasmic part,synapse,neuron part,cholinesterase activity,protein binding,acetylcholine metabolic process	5	4	NaN	NaN	NaN	NaN	23.6819	25.8763	26.9949	25.928	22.7195	NaN	NaN	NaN	NaN	NaN	NaN	NaN	NaN	NaN	NaN	NaN	25.4953	25.1651	22.8539	25.7704	18	18	40	81.683	0	256.37	2641500000	85
DERPT_G8293	Full=Ubiquitin-like modifier-activating enzyme 1 ame: Full=Ubiquitin-activating enzyme E1 heterochromatin,nucleus,mitochondrion,lysosomal membrane,cytosol,plasma membrane,plasmodesma,endosome membrane,desmosome,rough endoplasmic reticulum membrane,extracel	6	4	22.6327	NaN	NaN	NaN	NaN	NaN	23.2209	24.3209	22.5502	NaN	NaN	NaN	25.5101	25.5658	NaN	NaN	NaN	NaN	NaN	NaN	26.5535	28.8841	24.0982	26.5384	33	33	44.2	129.72	0	256.29	5899400000	105
DERPT_G1058	Full=2,3-diketo-L-gulonate reductase Short=2,3-DKG reductase ame: Full=3-dehydro-L-gulonate 2-dehydrogenase oxidoreductase activity,oxidation-reduction process	9	4	NaN	NaN	19.8127	21.0523	21.509	23.3909	28.2567	28.6307	22.9366	NaN	NaN	NaN	21.0754	NaN	NaN	21.098	NaN	NaN	NaN	NaN	26.4378	26.8271	25.6729	26.8865	18	18	76.3	39.215	0	254.05	7049700000	87
DERPT_G7817	Full=Beta-galactosidase ame: Full=Acid beta-galactosidase Short=Lactase Flags: Precursor extracellular space,intracellular membrane-bounded organelle,cytoplasmic part,beta-galactosidase activity,galactose metabolic process,glycosaminoglycan catabolic proce	8	4	21.5183	NaN	24.8433	28.1584	29.7771	28.3808	26.4298	22.6774	NaN	NaN	NaN	NaN	NaN	NaN	NaN	NaN	NaN	22.2566	NaN	NaN	27.8853	27.5765	27.5396	27.4551	23	23	46.5	71.322	0	253.57	12623000000	136
DERPT_G7681	Full=V-type proton ATPase subunit B Short=V-ATPase subunit B ame: Full=Vacuolar proton pump subunit B vacuolar proton-transporting V-type ATPase, V1 domain,fungal-type vacuole membrane,ruffle,lysosomal membrane,early endosome,Golgi apparatus,cytosol,microv	13	4	26.6072	25.6904	26.0732	25.0288	24.6396	24.5534	22.7584	23.2146	23.1267	23.2681	NaN	23.5729	23.9397	25.9448	NaN	NaN	NaN	NaN	NaN	NaN	27.5584	27.6475	26.8108	28.2884	24	24	71.5	55.908	0	253.5	7378200000	121
DERPT_G5855	Full=Coatomer subunit beta ame: Full=Beta -coat Short=Beta -COP endoplasmic reticulum,cytosol,plasma membrane,COPI vesicle coat,alpha-1,3-mannosyltransferase activity,protein kinase C binding,structural molecule activity,ubiquitin binding,nematode larval d	7	4	NaN	NaN	22.6497	23.2257	22.7309	25.3032	25.4306	25.107	23.7469	NaN	NaN	NaN	NaN	NaN	NaN	NaN	NaN	NaN	NaN	NaN	27.2811	26.9729	25.2597	27.4646	24	24	28.4	159.48	0	253	4473900000	82
DERPT_G3727	Full=Versicolorin reductase nucleus,peroxisome,endomembrane system,organelle membrane,intracellular organelle part,oxidoreductase activity, acting on the CH-OH group of donors, NAD or NADP as acceptor,xylulose metabolic process,alcohol metabolic process,li	3	4	NaN	NaN	NaN	NaN	NaN	25.6667	27.9171	25.6676	NaN	NaN	NaN	NaN	NaN	NaN	NaN	NaN	NaN	NaN	NaN	NaN	25.8822	26.3072	25.9033	26.1116	12	9	66.8	28.925	0	250.29	4037800000	65
DERPT_G7298	Proposed Pan-Allergen, Allergen Homolog (Tyr p28, Der f28, Pen c19, Cla h4, Cor a10): Full=Heat shock cognate 71 kDa ame: Full=Heat shock 70 kDa 8 ubiquitin ligase complex,Prp19 complex,photoreceptor inner segment,perichromatin fibrils,nucleolus,mitochondr	18	4	NaN	NaN	24.7282	25.6163	27.0907	28.6786	29.9282	28.6238	29.4041	28.7997	29.8646	28.9675	27.677	26.5264	25.447	23.8735	24.9004	25.0349	24.358	24.329	28.2324	28.4867	27.0873	28.7207	59	17	68.2	64.644	0	249.92	28529000000	178
DERPT_G6671	Full=Negative elongation factor A NELF complex,nucleic acid binding,chromatin binding,protein binding,negative regulation of transcription elongation from RNA polymerase II promoter,chromatin	7	4	NaN	NaN	NaN	NaN	NaN	NaN	NaN	NaN	23.4274	28.3473	29.885	28.9065	27.1882	27.0053	25.7513	NaN	NaN	NaN	NaN	NaN	27.1439	26.8547	28.5711	26.9457	13	13	6	241.72	0	249.84	11289000000	80
DERPT_G10552	Full=ELKS Rab6-interacting CAST family member 1 Short=ERC-1 ame: Full=CAZ-associated structural 2 Short=CAST2 ame: Full=Rab6-interacting 2 plasma membrane,endomembrane system,neuron projection,intracellular membrane-bounded organelle,membrane part,cytoplas	13	1	24.7155	28.4216	28.8963	27.6582	26.6691	27.6527	26.7581	26.715	26.949	26.7601	25.5888	24.5368	25.4194	NaN	NaN	NaN	NaN	NaN	NaN	NaN	NaN	NaN	24.0806	NaN	60	59	23	341.68	0	248.19	6855400000	111
DERPT_G5284	Full=Phosphoserine aminotransferase ame: Full=Phosphohydroxythreonine aminotransferase Short=PSAT O-phospho-L-serine:2-oxoglutarate aminotransferase activity,L-serine biosynthetic process,glycine metabolic process,threonine metabolic process,vitamin B6 met	9	4	NaN	NaN	NaN	NaN	NaN	23.8366	28.3089	28.6594	25.1195	NaN	NaN	NaN	26.9995	27.0968	25.9841	25.2867	24.8359	NaN	NaN	NaN	26.8829	27.4109	25.0922	27.7134	26	26	78.8	42.898	0	248.18	8628300000	97
DERPT_G5278	Full=Pancreatic triacylglycerol lipase Short=PL Short=PTL Short=Pancreatic lipase Flags: Precursor extracellular region,cell part,protein binding,lipase activity,ion binding,carboxylic ester hydrolase activity,glycerophospholipid metabolic process,digestio	8	4	NaN	NaN	22.8765	23.3545	27.5934	28.9786	28.4081	26.0192	23.2946	NaN	NaN	NaN	25.0108	NaN	NaN	NaN	NaN	NaN	NaN	NaN	24.5855	25.7749	25.1242	25.4496	26	26	46.7	76.679	0	247.54	6366600000	88
DERPT_G8016	--NA--	5	4	NaN	NaN	NaN	NaN	NaN	NaN	22.5057	26.2436	25.8448	26.4807	24.0651	NaN	NaN	NaN	NaN	NaN	NaN	NaN	NaN	NaN	24.5265	25.1629	24.5898	25.1563	4	4	18.4	41.789	0	246.53	1901000000	28
DERPT_G7690	Full=Major facilitator superfamily domain-containing 4A ame: Full=Major facilitator superfamily domain-containing 4 integral component of membrane,transmembrane transport	7	4	NaN	NaN	NaN	NaN	NaN	NaN	20.278	23.9801	28.6388	29.8086	27.0312	21.8584	22.3615	NaN	NaN	NaN	NaN	NaN	NaN	NaN	23.4686	22.2653	25.3801	23.7145	16	16	27.9	69.072	0	243.89	5972400000	74
DERPT_G6828	Full=Beta-ureidopropionase ame: Full=Beta-alanine synthase ame: Full=N-carbamoyl-beta-alanine amidohydrolase cytosol,extracellular exosome,beta-ureidopropionase activity,zinc ion binding,liver development,uracil catabolic process,beta-alanine biosynthetic	8	4	NaN	NaN	25.7948	27.3889	27.8605	27.9672	26.6096	26.2863	23.7055	NaN	NaN	NaN	NaN	NaN	NaN	NaN	NaN	24.2876	NaN	NaN	26.2721	26.3038	26.375	26.2875	21	21	64.9	46.887	0	243.4	6564100000	79
DERPT_G11160	Full=Methylcrotonoyl- carboxylase beta mitochondrial Short=MCCase subunit beta ame: Full=3-methylcrotonyl- carboxylase 2 ame: Full=3-methylcrotonyl- carboxylase non-biotin-containing subunit ame: Full=3-methylcrotonyl- :carbon dioxide ligase subunit beta F	7	4	NaN	24.7645	25.0222	27.1345	27.0965	25.381	24.1271	25.4945	NaN	NaN	NaN	NaN	NaN	NaN	NaN	NaN	NaN	NaN	NaN	NaN	24.8232	24.4578	25.0135	24.4329	20	17	54.1	62.741	0	242.68	2683600000	61
DERPT_G8906	Full=Glutamine synthetase Short=GS ame: Full=Glutamate--ammonia ligase mitochondrion,rough endoplasmic reticulum,lipid droplet,nuclear periphery,perikaryon,myelin sheath,axon terminus,extracellular exosome,glial cell projection,magnesium ion binding,glutam	11	4	NaN	NaN	25.2797	25.6476	27.5772	26.9084	24.1847	NaN	NaN	NaN	NaN	25.4693	27.0161	27.3427	26.7556	26.6565	24.3259	NaN	NaN	NaN	27.3195	27.1619	24.4598	28.0706	20	19	8.6	302.03	0	242.39	5655200000	91
DERPT_G10029	Full=Bifunctional Includes: ame: Full=Methylenetetrahydrofolate dehydrogenase Includes: ame: Full=Methenyltetrahydrofolate cyclohydrolase mitochondrion,lipid droplet,cytosol,chloroplast,membrane,extracellular exosome,nucleotide binding,formate-tetrahydrofo	8	4	25.2151	NaN	NaN	NaN	NaN	NaN	NaN	25.8437	25.8042	24.1837	NaN	24.6618	27.3717	28.3101	27.0164	NaN	NaN	NaN	NaN	NaN	29.06	28.7419	28.9284	28.3936	19	19	57.2	48.745	0	242.06	12291000000	88
DERPT_G7101	Proposed StenAllergen, Allergen Homolog (Der f13, Blot 13, Aca s13): Full=Fatty acid-binding heart ame: Full=Fatty acid-binding 3 ame: Full=Heart-type fatty acid-binding Short=H-FABP nucleoplasm,cytosol,axon,cell body fiber,retinoic acid binding,embryonic	4	4	NaN	NaN	NaN	NaN	NaN	NaN	NaN	NaN	NaN	27.5692	28.9211	27.2595	24.9032	NaN	NaN	NaN	NaN	NaN	NaN	NaN	25.6962	25.0108	24.612	25.101	19	19	77.1	16.382	0	241.74	3978600000	56
DERPT_G10742	Proposed StenAllergen, Allergen homolog (Eur m1, Der f1, Der p1, Pso o1, Der m1)): Full=Peptidase 1 ame: Full=Allergen Eur m I ame: Full=Mite group 1 allergen Eur m 1 ame: Allergen=Eur m 1 Flags: Precursor vacuole,protein binding,cysteine-type peptidase ac	4	4	NaN	NaN	NaN	NaN	NaN	NaN	NaN	NaN	NaN	NaN	27.7257	28.6484	25.9937	23.8041	NaN	NaN	NaN	NaN	NaN	NaN	26.9164	26.3016	26.682	26.1499	15	15	59.6	38.222	0	240.37	4603700000	73
DERPT_G1479	Full=Elongation factor 1-beta Short=EF-1-beta nucleus,endoplasmic reticulum,lipid droplet,cytosol,eukaryotic translation elongation factor 1 complex,translation elongation factor activity,protein binding,nematode larval development,transcription, DNA-templ	15	4	24.6327	NaN	26.4793	27.0864	26.4338	24.8556	26.2592	27.3241	26.7882	28.6675	29.2671	28.2838	26.8553	26.2646	25.3544	NaN	NaN	25.4124	NaN	NaN	26.652	26.2945	26.1581	25.669	16	16	21.8	90.333	0	239.78	9917600000	100
DERPT_G4885	Full=Isocitrate dehydrogenase mitochondrial inner membrane,peroxisome,cytosol,plasma membrane,cell-cell adherens junction,plasmodesma,chloroplast stroma,apoplast,extracellular exosome,magnesium ion binding,isocitrate dehydrogenase (NADP+) activity,signalin	10	4	25.0875	23.0594	23.6166	25.6226	26.447	27.511	28.9178	26.8391	23.872	NaN	NaN	NaN	NaN	NaN	NaN	24.3987	NaN	NaN	NaN	NaN	26.7858	27.3091	25.9366	27.5031	25	22	69.6	52.4	0	239.42	8896900000	131
DERPT_G1398	Full=Acetyl- mitochondrial Short=ACC Includes: ame: Full=Biotin carboxylase Flags: Precursor nucleolus,mitochondrion,endoplasmic reticulum membrane,cytosol,plasma membrane,actin cytoskeleton,extracellular exosome,acetyl-CoA carboxylase activity,biotin carb	4	4	NaN	NaN	NaN	NaN	25.8154	25.1072	NaN	24.5144	23.6684	NaN	NaN	NaN	NaN	NaN	NaN	NaN	NaN	NaN	NaN	NaN	25.3393	25.2525	24.9883	25.9423	29	29	21.7	235.03	0	238.99	1874900000	77
DERPT_G10035	Full=26S proteasome regulatory subunit 7 ame: Full=26S proteasome AAA-ATPase subunit RPT1 ame: Full=Proteasome 26S subunit ATPase 2 P-body,transcription factor TFIIH holo complex,microtubule associated complex,plasma membrane,proteasome regulatory particle	6	3	NaN	NaN	25.7421	26.5688	26.3983	26.9478	25.2989	25.4054	NaN	NaN	NaN	NaN	NaN	NaN	NaN	NaN	NaN	NaN	NaN	NaN	25.2909	25.3739	NaN	25.6406	16	16	38.9	48.864	0	238.4	2736100000	53
DERPT_G10462	Full=Sorbitol dehydrogenase ame: Full=L-iditol 2-dehydrogenase nucleosome,nucleus,mitochondrion,cytosol,plasmodesma,membrane,motile cilium,DNA binding,L-iditol 2-dehydrogenase activity,sorbitol metabolic process,nucleosome assembly,alditol catabolic proces	19	4	27.7047	24.7149	26.6866	26.9009	27.062	28.7778	28.5512	28.2289	28.6633	26.448	23.0732	26.5662	28.2213	27.7083	25.8869	25.8594	25.2336	25.6633	NaN	26.3293	29.9624	30.9178	28.0397	30.5495	33	33	53.3	63.371	0	238.07	46321000000	252
DERPT_G7182	Full=Lamin-B1 Flags: Precursor nuclear inner membrane,lamin filament,nucleoplasm,lipid droplet,centrosome,microtubule associated complex,nuclear matrix,spindle envelope,mitotic spindle,structural molecule activity,histone binding,phospholipase binding,comp	14	4	22.9443	25.9662	27.2404	27.145	26.3832	26.3451	26.2989	26.1219	27.5469	28.285	27.2869	26.4374	25.3522	25.6727	NaN	NaN	NaN	NaN	NaN	NaN	26.0273	25.9679	26.5206	25.8331	34	34	42.3	85.295	0	237.09	7556000000	123
DERPT_G4365	Full=T-complex 1 subunit theta Short=TCP-1-theta ame: Full=CCT-theta zona pellucida receptor complex,nucleoplasm,centrosome,chaperonin-containing T-complex,microtubule,cell-cell adherens junction,plasmodesma,membrane,cell projection,cell body,intermediate	13	4	26.1542	28.3633	27.7874	25.5643	25.0983	24.5706	26.9043	25.8339	23.3016	NaN	NaN	NaN	23.8714	24.8517	23.793	NaN	NaN	25.1572	NaN	NaN	26.5569	27.8135	24.8289	27.3273	32	32	72.9	59.394	0	236.38	6439600000	117
DERPT_G366	Full=Dihydropyrimidine dehydrogenase cytosol,chloroplast stroma,uracil binding,dihydrouracil dehydrogenase (NAD+) activity,iron ion binding,dihydropyrimidine dehydrogenase (NADP+) activity,protein homodimerization activity,NADP binding,iron-sulfur cluster	4	4	NaN	NaN	NaN	23.1069	26.4345	27.8661	24.605	NaN	NaN	NaN	NaN	NaN	NaN	NaN	NaN	NaN	NaN	NaN	NaN	NaN	26.0289	26.3295	23.937	26.2805	30	30	41.1	112.59	0	235.96	3545400000	81
DERPT_G10983	Full=Follistatin-related 3 ame: Full=Follistatin 3 ame: Full=Follistatin-related gene Flags: Precursor laminin binding,G-protein coupled acetylcholine receptor signaling pathway,receptor clustering	4	3	29.9717	29.1239	27.1708	23.1793	NaN	NaN	NaN	NaN	NaN	NaN	NaN	NaN	NaN	NaN	NaN	NaN	NaN	NaN	NaN	NaN	21.7878	23.8821	NaN	22.1423	11	11	38.7	38.33	0	235.95	2322900000	42
DERPT_G5928	Full=Neural cell adhesion molecule 1 Short=N-CAM-1 Short=NCAM-1 ame: CD_antigen=CD56 Flags: Precursor sarcomere,cell projection,membrane-bounded organelle,plasma membrane region,cytoskeletal protein binding,enzyme binding,regulation of protein phosphorylat	14	4	23.8283	24.0486	25.0298	25.5204	24.6857	26.4913	30.5121	28.9442	26.6674	23.6431	21.5083	21.3548	21.8355	19.4677	NaN	NaN	NaN	NaN	NaN	NaN	26.3724	25.9601	26.8687	25.6166	29	29	44.7	59.994	0	235.5	13929000000	147
DERPT_G7316	Full=Glutathione peroxidase 3 Short=GPx-3 Short=GSHPx-3 ame: Full=Plasma glutathione peroxidase Short=GPx-P Short=GSHPx-P Flags: Precursor extracellular space,mitochondrion,sperm plasma membrane,glutathione peroxidase activity,protein binding,temperature h	14	4	27.7428	28.3171	26.4936	26.7187	27.7979	31.515	29.8261	26.7469	22.627	22.1827	22.4697	NaN	24.5667	NaN	22.0888	23.5923	NaN	NaN	NaN	NaN	27.2736	27.0812	27.9886	27.2523	19	19	54.4	33.107	0	235.07	26275000000	159
DERPT_G3065	Full=6-phosphogluconolactonase Short=6PGL chloroplast,intracellular organelle part,binding,6-phosphogluconolactonase activity,carbohydrate metabolic process,pentose-phosphate shunt,defense response to other organism	6	4	NaN	NaN	NaN	NaN	NaN	NaN	NaN	24.3007	27.3596	28.2131	27.3134	25.2614	23.1966	NaN	NaN	NaN	NaN	NaN	NaN	NaN	27.4168	26.3499	27.6012	26.7636	16	16	79.5	26.893	0	233.99	7311500000	72
DERPT_G7335	Full=Pyruvate dehydrogenase E1 component subunit alpha alpha-ketoacid dehydrogenase activity,3-methyl-2-oxobutanoate dehydrogenase (2-methylpropanoyl-transferring) activity,protein binding,2-dehydropantoate 2-reductase activity,lipid metabolic process,resp	6	4	NaN	NaN	24.6739	26.4467	27.0454	29.2809	27.3714	23.8718	NaN	NaN	NaN	NaN	NaN	NaN	NaN	NaN	NaN	NaN	NaN	NaN	26.5176	26.4615	24.8094	26.4617	26	26	57.9	56.175	0	232.29	6817500000	95
DERPT_G385	Full=Electron transfer flavo subunit beta Short=Beta-ETF mitochondrial electron transfer flavoprotein complex,extracellular exosome,electron transfer activity,leucine catabolic process,transport,chlorophyll catabolic process,fatty acid beta-oxidation using	7	4	NaN	NaN	NaN	NaN	NaN	NaN	24.4938	26.867	26.8069	24.8511	NaN	27.404	27.4767	26.0289	NaN	NaN	NaN	NaN	NaN	NaN	27.1134	26.6337	26.2432	27.13	16	16	68.2	27.932	0	231.93	5554500000	72
DERPT_G7959	Full=Ras-related Rab-11A Flags: Precursor Golgi membrane,spindle pole,mitochondrion,multivesicular body,vacuolar membrane,trans-Golgi network,centrosome,spindle pole body,kinetochore microtubule,cytosol,cell-cell adherens junction,aggresome,apical plasma m	7	4	24.3506	NaN	NaN	NaN	NaN	NaN	NaN	NaN	27.2858	28.7674	27.783	25.4132	24.7094	25.3883	NaN	NaN	NaN	NaN	NaN	NaN	25.0911	25.8313	23.9289	25.2058	14	14	11.3	141.3	0	231.82	4093300000	53
DERPT_G10796	Full=Alkaline tissue-nonspecific isozyme Short=AP-TNAP Short=TNSALP ame: Full=Alkaline phosphatase liver bone kidney isozyme Flags: Precursor extracellular matrix,plasma membrane,brush border,cell surface,myofibril,membrane part,extracellular membrane-boun	0	4	NaN	NaN	NaN	NaN	NaN	NaN	NaN	NaN	NaN	NaN	NaN	NaN	NaN	NaN	NaN	NaN	NaN	NaN	NaN	NaN	27.0684	27.384	25.3578	27.0209	15	15	26.2	122.66	0	230.3	3920400000	58
DERPT_G1649	Allergen Homolog (Bla g6): Full=Calmodulin Short= nucleoplasm,centriole,cytosol,microtubule associated complex,spindle microtubule,voltage-gated potassium channel complex,rhabdomere,sarcomere,midbody,myosin V complex,myosin VI complex,nuclear membrane,calc	7	4	NaN	NaN	NaN	NaN	NaN	NaN	NaN	25.8968	28.2472	27.9173	26.3298	27.4348	26.4356	26.8482	NaN	NaN	NaN	NaN	NaN	NaN	25.9423	25.6763	26.1039	24.9569	12	12	19.5	73.587	0	230.18	4876700000	62
DERPT_G11456	Full=Transcriptional activator Pur-alpha ame: Full=Purine-rich single-stranded DNA-binding alpha DNA replication factor A complex,dendrite,neuronal cell body,translation repressor activity, mRNA regulatory element binding,RNA polymerase II regulatory regio	13	4	24.6699	NaN	NaN	NaN	NaN	NaN	NaN	NaN	24.2096	24.3242	24.8347	25.4447	26.2315	26.3555	25.0376	24.9057	26.1369	25.7957	26.9989	26.6334	23.7032	23.4516	23.1099	23.7855	8	8	26.1	36.985	0	230.11	1616300000	40
DERPT_G4187	Full=Prosaposin ame: Full=Sulfated glyco 1 Short=SGP-1 Contains: ame: Full=Saposin-A Contains: ame: Full=Saposin-B-Val Contains: ame: Full=Saposin-B Contains: ame: Full=Saposin-C Contains: ame: Full=Saposin-D Flags: Precursor lysosome,sphingolipid metaboli	20	4	27.1648	25.4521	27.4483	27.2145	26.5565	25.4062	25.5657	25.7816	27.1945	27.117	28.4611	28.1529	26.9543	27.0698	28.3359	30.2332	30.208	31.0983	30.0099	28.228	25.2622	24.7819	25.3831	24.9414	23	23	43.5	62.392	0	230.08	10063000000	122
DERPT_G272	--NA--	9	4	NaN	NaN	NaN	NaN	NaN	NaN	NaN	23.2998	26.5862	30.4386	29.3208	26.3285	23.9707	NaN	NaN	22.9741	24.3395	23.6439	NaN	NaN	24.8671	24.0754	25.9131	24.8755	16	16	48.2	21.716	0	229.97	8450200000	61
DERPT_G6042	Full=Integrin alpha-3 ame: Full=CD49 antigen-like family member C ame: Full=Galacto B3 Short=GAPB3 ame: Full=VLA-3 subunit alpha ame: CD_antigen=CD49c Contains: ame: Full=Integrin alpha-3 heavy chain Contains: ame: Full=Integrin alpha-3 light chain Flags:	7	4	29.6374	24.5791	23.6479	NaN	NaN	22.0945	NaN	21.6393	22.3244	22.5551	NaN	NaN	NaN	NaN	NaN	NaN	NaN	NaN	NaN	NaN	25.0718	25.2612	25.1632	24.3095	38	38	44.2	120.9	0	229.35	2588800000	88
DERPT_G9337	Full=Sodium-driven chloride bicarbonate exchanger ame: Full=Solute carrier family 4 member 10 integral component of plasma membrane,basolateral plasma membrane,apical plasma membrane,cytoplasmic vesicle,neuronal cell body membrane,apical dendrite,basal den	17	4	25.6307	24.1451	25.5242	25.5686	24.7147	27.3939	28.2897	28.8238	29.4058	28.0478	25.3673	24.8238	25.6783	26.1379	25.0418	NaN	24.4636	NaN	NaN	23.8959	26.3343	27.0134	26.1426	26.4554	21	21	16.7	155.12	0	229.14	11865000000	124
DERPT_G4114	Full=Acetyl- mitochondrial ame: Full=Acetoacetyl- thiolase Flags: Precursor nucleus,mitochondrial inner membrane,mitochondrial matrix,peroxisome,cytosol,plasma membrane,extracellular exosome,acetyl-CoA C-acetyltransferase activity,carbon-carbon lyase activ	14	4	NaN	NaN	22.9976	25.3822	27.4596	29.6219	26.3023	23.9235	NaN	NaN	NaN	24.2081	26.5403	28.0265	29.0325	27.4054	27.1942	26.4412	25.7718	NaN	27.718	28.2053	26.8713	27.9621	21	21	56.5	42.678	0	224.72	9020400000	97
DERPT_G7763	Full= disulfide-isomerase A6 Flags: Precursor vacuolar membrane,endoplasmic reticulum lumen,endoplasmic reticulum membrane,smooth endoplasmic reticulum,endoplasmic reticulum-Golgi intermediate compartment,Golgi apparatus,lipid droplet,plasma membrane,plant	6	4	NaN	NaN	NaN	NaN	NaN	NaN	NaN	22.7287	25.222	26.7615	28.2733	27.7979	25.2264	NaN	NaN	NaN	NaN	NaN	NaN	NaN	26.4763	26.8507	26.5418	26.7209	19	19	56.3	48.548	0	224.5	5085000000	77
DERPT_G3682	Full=Glutamate receptor NMDA 2B Short= 2B ame: Full=Glutamate extracellular region,synaptic vesicle,cell surface,postsynaptic density,NMDA selective glutamate receptor complex,somatodendritic compartment,presynaptic membrane,neuron projection,postsynaptic	10	4	29.6082	30.0757	27.7513	24.425	NaN	24.9235	23.1056	24.2492	26.6636	25.9346	22.2236	NaN	NaN	NaN	NaN	NaN	NaN	NaN	NaN	NaN	24.6851	25.5356	25.6474	24.9615	16	16	45.5	43.905	0	223.64	4828900000	79
DERPT_G1219	Full=N-acetylgalactosamine-6-sulfatase ame: Full=Chondroitinsulfatase Short=Chondroitinase ame: Full=Galactose-6-sulfate sulfatase ame: Full=N-acetylgalactosamine-6-sulfate sulfatase Short= c6S sulfatase Flags: Precursor plasma membrane,endomembrane system	7	4	NaN	NaN	22.4909	21.6341	24.0933	28.581	28.8013	26.3217	24.3272	NaN	NaN	NaN	NaN	NaN	NaN	NaN	NaN	NaN	NaN	NaN	26.6079	25.978	27.3985	25.9846	23	23	12.4	199.9	0	223.28	7280900000	98
DERPT_G9901	Full=Acylpyruvase mitochondrial ame: Full=Fumarylacetoacetate hydrolase domain-containing 1 ame: Full=Oxaloacetate decarboxylase Short=OAA decarboxylase Flags: Precursor nucleoplasm,mitochondrial inner membrane,cytosol,oxaloacetate decarboxylase activity,a	4	4	25.1106	NaN	NaN	NaN	23.307	NaN	NaN	NaN	27.8534	26.6587	NaN	NaN	NaN	NaN	NaN	NaN	NaN	NaN	NaN	NaN	27.0669	26.4746	27.5198	26.6867	7	7	56.5	23.584	0	222.29	5369400000	41
DERPT_G9947	Full=Acid phosphatase type 7 ame: Full=Purple acid phosphatase long form Flags: Precursor acid phosphatase activity,protein binding,metal ion binding,riboflavin metabolic process,hexachlorocyclohexane metabolic process	8	4	NaN	NaN	NaN	NaN	18.5096	22.4751	24.9242	28.3751	29.8578	26.8085	23.8687	23.8477	NaN	NaN	NaN	NaN	NaN	NaN	NaN	NaN	27.4734	27.3326	27.3932	27.2593	31	31	18.4	225.28	0	222.1	11383000000	161
DERPT_G1503	Allergen Homolog (Der f7): Full=Mite allergen Lep d 7 ame: Allergen=Lep d 7 Flags: Precursor	9	4	26.8663	24.5487	24.0653	NaN	23.1195	NaN	NaN	25.0649	29.1966	28.3972	26.5783	NaN	24.3942	NaN	NaN	NaN	NaN	NaN	NaN	NaN	28.443	29.3243	28.0825	28.6297	13	13	53.5	23.611	0	221.92	16123000000	121
DERPT_G3382	Full=Coatomer subunit delta ame: Full=Archain ame: Full=Delta-coat Short=Delta-COP endoplasmic reticulum,cytosol,plasma membrane,plasmodesma,COPI vesicle coat,catalytic activity,zinc ion binding,protein kinase binding,positive regulation of cytokine produc	5	4	NaN	NaN	NaN	NaN	23.4838	NaN	24.3122	26.2766	28.3033	24.7644	NaN	NaN	NaN	NaN	NaN	NaN	NaN	NaN	NaN	NaN	26.9566	26.3562	27.2512	26.7992	15	15	19.1	99.328	0	221.82	5699800000	56
DERPT_G10649	---NA---	6	4	27.8755	27.1194	28.1592	27.4206	26.4688	26.5216	NaN	NaN	NaN	NaN	NaN	NaN	NaN	NaN	NaN	NaN	NaN	NaN	NaN	NaN	25.9734	25.5179	27.3668	25.4546	9	9	27.8	35.511	0	220.95	4484500000	53
DERPT_G8558	---NA---	19	4	24.291	23.5295	24.4395	24.9179	26.9151	30.5343	30.4078	29.9289	28.5795	28.7174	26.5508	26.6728	26.9231	NaN	24.293	25.1122	26.0969	26.5946	25.4602	25.7171	27.356	26.509	29.1687	27.2853	17	16	50.6	27.425	0	220.85	27930000000	161
DERPT_G1595	Full=Retinal dehydrogenase 2 Short=RALDH 2 Short= 2 ame: Full=Aldehyde dehydrogenase family 1 member A2 ame: Full=Retinaldehyde-specific dehydrogenase type 2 Short=RALDH(II) mitochondrion,retinal dehydrogenase activity,3-chloroallyl aldehyde dehydrogenase	7	4	24.9886	24.3625	26.6577	27.6553	27.245	25.8841	NaN	NaN	NaN	NaN	NaN	NaN	23.9739	NaN	NaN	NaN	NaN	NaN	NaN	NaN	26.7819	27.137	26.775	27.2162	23	23	55.4	55.959	0	218.71	6489200000	96
DERPT_G1365	Proposed Sten-Allergen, Allergen Homolog (Der f35, Pso o2, Blo t2, Lep d2, Gly d2,): Full=Mite group 2 allergen Gly d ame: Allergen=Gly d extracellular region,protein binding,lipid binding,carbohydrate derivative binding,steroid metabolic process,cellular	20	4	28.3051	28.8547	29.5869	27.7575	27.2105	27.3227	27.4447	28.1174	30.0445	33.2982	33.7876	33.4545	30.9905	30.2509	30.4869	31.0562	31.0917	31.6514	30.9399	30.1933	32.5173	32.2084	33.2961	31.921	15	15	82.5	15.587	0	218.55	324490000000	302
DERPT_G10028	Full=C-1-tetrahydrofolate cytoplasmic Short=C1-THF synthase Includes: ame: Full=Methylenetetrahydrofolate dehydrogenase Includes: ame: Full=Methenyltetrahydrofolate cyclohydrolase Includes: ame: Full=Formyltetrahydrofolate synthetase nucleus,mitochondrion,	5	4	NaN	NaN	NaN	NaN	NaN	24.4203	25.2081	NaN	NaN	NaN	NaN	25.3524	27.8851	25.0566	NaN	NaN	NaN	NaN	NaN	NaN	27.4903	27.5455	25.1512	27.6479	21	21	47.7	70.793	0	218.54	5749200000	94
DERPT_G10933	Full=T-complex 1 subunit gamma Short=TCP-1-gamma ame: Full=CCT-gamma zona pellucida receptor complex,chaperonin-containing T-complex,microtubule,microtubule associated complex,plasma membrane,myelin sheath,cell body,extracellular exosome,ATP binding,ATPase	8	4	26.8918	28.765	28.353	26.0133	23.3259	NaN	NaN	NaN	NaN	24.0817	24.0669	NaN	NaN	NaN	23.478	NaN	NaN	NaN	NaN	NaN	25.3799	26.4067	23.6764	26.2599	32	32	43.8	83.052	0	216.78	4057000000	104
DERPT_G1150	Full=Glutamate formimidoyltransferase ame: Full=5-formyltetrahydrofolate cyclo-ligase ame: Full=Glutamate formiminotransferase ame: Full=Glutamate formyltransferase Golgi membrane,endoplasmic reticulum-Golgi intermediate compartment,cytosol,smooth endoplas	6	4	NaN	NaN	29.496	27.1526	23.6339	NaN	NaN	NaN	NaN	NaN	23.0015	NaN	22.1647	NaN	22.7392	NaN	NaN	NaN	NaN	NaN	24.9809	25.709	22.6183	25.3523	27	27	69.5	60.892	0	216.23	4495600000	88
DERPT_G3529	Full=Medium-chain specific acyl- mitochondrial Short=MCAD Flags: Precursor cell wall,nucleus,mitochondrial matrix,peroxisome,lipid droplet,cytosol,microtubule associated complex,plasma membrane,axon,mitochondrial membrane,extracellular exosome,fatty-acyl-C	2	4	NaN	NaN	NaN	NaN	24.5167	25.998	NaN	NaN	NaN	NaN	NaN	NaN	NaN	NaN	NaN	NaN	NaN	NaN	NaN	NaN	26.0706	26.0377	24.1374	25.5378	20	14	48	63.408	0	215.83	2118700000	31
DERPT_G7490	Full=NADH-ubiquinone oxidoreductase 75 kDa mitochondrial ame: Full=Complex I-75kD Short=CI-75kD Flags: Precursor mitochondrial respiratory chain complex I,mitochondrial intermembrane space,chloroplast,myelin sheath,NADH dehydrogenase (ubiquinone) activity,	5	4	24.5028	NaN	NaN	NaN	NaN	NaN	NaN	NaN	NaN	NaN	NaN	25.5221	26.9628	26.9626	25.5378	NaN	NaN	NaN	NaN	NaN	26.0497	28.2985	23.765	27.7494	25	25	52.5	84.176	0	215.63	5074200000	78
DERPT_G6770	Full= serine threonine- kinase haspin homolog intracellular organelle,protein kinase activity,ATP binding,protein phosphorylation,covalent chromatin modification,biological_process	4	4	NaN	NaN	NaN	NaN	NaN	NaN	NaN	NaN	NaN	NaN	27.2122	29.9826	26.6626	NaN	NaN	NaN	NaN	25.2581	NaN	NaN	24.9792	23.4461	25.9722	24.6339	9	9	10.9	77.98	0	214.72	4374900000	38
DERPT_G9303	Full=ATP-dependent rRNA helicase RRP3 nucleolus,cytosol,membrane,RNA binding,ATP-dependent RNA helicase activity,ATP binding,cysteine-type peptidase activity,maturation of SSU-rRNA from tricistronic rRNA transcript (SSU-rRNA, 5.8S rRNA, LSU-rRNA),nematode	15	4	23.8239	NaN	23.3343	NaN	NaN	22.8001	25.4297	27.2072	29.3259	29.6465	28.3948	26.993	23.7085	24.9425	24.4629	25.8632	25.431	23.3898	NaN	NaN	27.7638	28.1497	26.7451	28.0591	29	29	31.7	153.08	0	213.66	14204000000	155
DERPT_G5436	Full=F-actin-capping subunit alpha-2 ame: Full= alpha-2 dynactin complex,brush border,cell-cell adherens junction,F-actin capping protein complex,apical plasma membrane,cortical cytoskeleton,extracellular exosome,WASH complex,protein heterodimerization act	5	4	NaN	NaN	NaN	NaN	NaN	24.2758	25.5856	28.179	26.0206	NaN	NaN	NaN	NaN	23.4142	NaN	NaN	NaN	NaN	NaN	NaN	26.2351	26.0523	24.8397	26.2587	19	19	76	34.091	0	212.89	4215800000	65
DERPT_G7617	Full=Cathepsin K Flags: Precursor extracellular space,nucleolus,lysosome,cytoplasmic vesicle,fusome,extracellular exosome,cysteine-type endopeptidase activity,methyltransferase activity,cysteine-type carboxypeptidase activity,histone binding,response to or	16	4	25.3403	NaN	23.9336	23.8376	24.0123	27.2531	28.2421	27.8979	26.7984	26.8827	25.2598	NaN	NaN	27.0399	27.5464	28.6578	30.4088	29.182	27.5522	NaN	27.4912	28.1274	25.7651	27.8974	21	21	31.7	106.24	0	212.5	6995600000	104
DERPT_G8546	Full=ATP synthase subunit mitochondrial ame: Full=F-ATPase delta subunit Flags: Precursor mitochondrial proton-transporting ATP synthase, central stalk,zinc ion binding,protein-containing complex binding,proton-transporting ATP synthase activity, rotationa	13	4	NaN	NaN	27.6604	31.644	30.9743	27.7655	25.135	23.2791	27.8499	28.0908	25.2421	NaN	24.1938	24.1587	23.7901	NaN	25.724	NaN	NaN	NaN	28.4338	27.1893	28.9832	28.3698	10	10	69.1	17.393	0	211.95	35260000000	162
DERPT_G245	Full=Programmed cell death 5 ame: Full=TF-1 cell apoptosis-related 19 Short= TFAR19 cytoplasm,membrane-bounded organelle,DNA binding,positive regulation of macromolecule metabolic process,positive regulation of mitochondrion organization,positive regulatio	5	3	NaN	NaN	NaN	NaN	NaN	NaN	NaN	NaN	25.0138	27.8999	26.8427	25.6588	NaN	24.809	NaN	NaN	NaN	NaN	NaN	NaN	24.1558	23.3713	24.7783	NaN	8	8	45.2	16.776	0	211.49	1786500000	28
DERPT_G3680	Full=Epoxide hydrolase 1 ame: Full=Epoxide hydratase ame: Full=Microsomal epoxide hydrolase Short=mEH plasma membrane,intracellular membrane-bounded organelle,organelle part,membrane part,cytoplasmic part,protein binding,ether hydrolase activity,alcohol me	4	4	27.5385	27.1333	26.4258	26.1184	NaN	NaN	NaN	NaN	NaN	NaN	NaN	NaN	NaN	NaN	NaN	NaN	NaN	NaN	NaN	NaN	27.5305	28.6948	26.4682	27.7759	22	22	28.8	129.78	0	211.34	6954400000	94
DERPT_G9529	Full=Dihydropyrimidinase Short=DHP Short=DHPase ame: Full=Dihydropyrimidine amidohydrolase ame: Full=Hydantoinase extracellular space,mitochondrion,cytosol,microtubule,membrane,lamellipodium,dendrite,growth cone,filamentous actin,neuronal cell body,termina	12	4	24.0721	NaN	NaN	21.9872	22.3265	25.6158	26.3894	24.1595	23.8412	NaN	23.3153	NaN	24.4801	24.7376	NaN	24.9777	25.7608	NaN	NaN	NaN	28.4321	28.2526	28.8041	28.4781	26	26	30.2	123.45	0	210.48	10167000000	124
DERPT_G8709	Proposed StenAllergen, Allergen Homolog (Blo t13, Tyr p13, Aca s13): Full=Fatty acid-binding heart ame: Full=Fatty acid-binding 3 ame: Full=Heart-type fatty acid-binding Short=H-FABP nucleoplasm,cytoplasm,long-chain fatty acid binding,cytokine production,n	8	4	NaN	NaN	NaN	NaN	NaN	NaN	NaN	NaN	25.8082	29.3818	30.0778	29.8893	28.3772	NaN	NaN	25.8019	26.1779	27.0898	NaN	NaN	28.7023	28.0762	29.9053	28.396	12	12	55.9	23.42	0	209.57	22869000000	75
DERPT_G8249	Full=Hypoxia up-regulated 1 Flags: Precursor smooth endoplasmic reticulum,integral component of membrane,endoplasmic reticulum chaperone complex,binding,symporter activity,response to ischemia,positive regulation of macromolecule metabolic process,regulati	4	4	NaN	NaN	NaN	NaN	NaN	NaN	26.2604	26.6098	24.5756	NaN	23.8168	NaN	NaN	NaN	NaN	NaN	NaN	NaN	NaN	NaN	25.8602	26.7186	24.4997	26.8559	19	19	18.7	171.45	0	209.35	3539300000	81
DERPT_G7104	Full= homolog subfamily C member 25 endoplasmic reticulum,membrane,calcium ion binding	8	4	NaN	NaN	NaN	NaN	24.3544	25.2362	26.0372	25.3543	27.4297	27.4158	26.0841	25.1108	NaN	NaN	NaN	NaN	NaN	NaN	NaN	NaN	26.4067	26.1122	25.5624	26.1579	12	12	17.4	84.054	0	208.98	4056200000	52
DERPT_G536	---NA---	15	4	25.3995	NaN	NaN	NaN	NaN	NaN	26.1296	25.0411	27.9018	29.6477	30.4877	30.3228	30.7734	32.435	32.7162	31.0482	30.1652	29.9654	29.1942	28.6469	26.3748	26.1911	28.3838	27.1554	6	6	19.3	43.866	0	207.85	16402000000	85
DERPT_G7564	Full=Moesin ame: Full=Membrane-organizing extension spike ruffle,immunological synapse,uropod,nucleolus,endosome,cytosol,actin filament,brush border,cell-cell adherens junction,focal adhesion,basolateral plasma membrane,extrinsic component of membrane,lame	10	0	NaN	NaN	NaN	NaN	NaN	23.6325	25.0608	26.9355	28.8698	28.2796	27.5407	23.0855	NaN	NaN	NaN	24.9206	24.1164	24.0497	NaN	NaN	NaN	NaN	NaN	NaN	27	27	40.9	68.264	0	207.65	5314200000	91
DERPT_G4239	Full=Very long-chain specific acyl- mitochondrial Short=VLCAD Flags: Precursor cell wall,nucleolus,mitochondrial inner membrane,cytosol,plasma membrane,mitochondrial nucleoid,fatty-acyl-CoA binding,electron transfer activity,very-long-chain-acyl-CoA dehydr	9	4	25.1746	NaN	23.45	23.9219	NaN	26.5209	25.2531	NaN	NaN	NaN	NaN	NaN	26.9181	27.1226	27.3988	27.8711	NaN	NaN	NaN	NaN	28.0497	28.292	27.4646	27.9593	31	31	60	71.796	0	206.82	7596600000	104
DERPT_G9736	Full=Tissue alpha-L-fucosidase ame: Full=Alpha-L-fucosidase I ame: Full=Alpha-L-fucoside fucohydrolase 1 Short=Alpha-L-fucosidase 1 Flags: Precursor lysosomal lumen,extracellular exosome,alpha-L-fucosidase activity,fucose binding,fucose metabolic process,m	5	4	NaN	NaN	23.8959	28.5319	29.8995	27.8034	23.5767	NaN	NaN	NaN	NaN	NaN	NaN	NaN	NaN	NaN	NaN	NaN	NaN	NaN	26.4587	26.0828	26.9988	25.628	17	17	38.6	53.276	0	206.4	9295900000	78
DERPT_G8799	Full=Glutamate ionotropic glutamate receptor complex,dendrite,intracellular membrane-bounded organelle,cytoplasmic part,synaptic membrane,presynapse,postsynapse,ionotropic glutamate receptor activity,extracellularly glutamate-gated ion channel activity,pro	14	4	26.0683	25.0998	26.1546	26.9069	26.2653	24.9545	26.4444	25.4564	24.5264	25.5897	27.0448	25.6043	24.8116	25.1839	NaN	NaN	NaN	NaN	NaN	NaN	26.2015	26.6264	25.9166	26.6151	22	22	13	213.77	0	205.17	5318500000	115
DERPT_G3636	Full=Peroxiredoxin-2 extracellular space,nucleus,mitochondrial matrix,early endosome,smooth endoplasmic reticulum,IkappaB kinase complex,melanosome,myelin sheath,extracellular exosome,protein C-terminus binding,thioredoxin peroxidase activity,selenium bind	12	4	24.5828	25.212	27.0868	28.4459	29.9847	28.5605	25.9621	27.0169	28.459	27.5911	24.4936	22.8413	NaN	NaN	NaN	NaN	NaN	NaN	NaN	NaN	27.4446	27.367	27.4386	27.6854	13	12	55.4	25.212	0	204.18	16064000000	109
DERPT_G6080	Full=Catalase extracellular space,mitochondrial intermembrane space,lysosome,peroxisomal membrane,peroxisomal matrix,endoplasmic reticulum,Golgi apparatus,cytosol,plasma membrane,focal adhesion,extracellular exosome,aminoacylase activity,catalase activity,	6	4	NaN	NaN	NaN	23.8888	26.8405	29.3865	26.5148	23.4216	22.6418	NaN	NaN	NaN	NaN	NaN	NaN	NaN	NaN	NaN	NaN	NaN	25.5103	25.4786	24.5131	25.6008	29	29	56	70.559	0	203.92	5672800000	84
DERPT_G9013	Allergen Homolog (Hom s eIF6): Full=Eukaryotic translation initiation factor 6 Short=eIF-6 lamin filament,nucleoplasm,nucleolus,cytosol,preribosome, large subunit precursor,extracellular exosome,translation initiation factor activity,ribosome binding,ribos	4	4	NaN	NaN	NaN	NaN	NaN	NaN	NaN	NaN	25.1903	27.9681	27.4795	24.5998	NaN	NaN	NaN	NaN	NaN	NaN	NaN	NaN	26.2939	25.9786	25.7488	26.043	10	10	70.3	27.026	0	203.92	3876000000	50
DERPT_G6331	---NA---	13	4	NaN	22.1153	25.6732	25.2513	25.7039	25.3242	27.3883	27.8707	28.497	28.7575	28.3589	26.2166	27.3029	22.7446	NaN	NaN	NaN	NaN	NaN	NaN	24.2051	23.5842	25.5514	24.2019	48	48	42.8	111.47	0	203.79	7394600000	141
DERPT_G3079	Full=Very long-chain specific acyl- mitochondrial Short=VLCAD Flags: Precursor mitochondrial part,intracellular organelle lumen,acyl-CoA dehydrogenase activity,binding,fatty acid catabolic process,regulation of lipid metabolic process,oxidation-reduction p	4	4	NaN	NaN	25.9976	26.075	25.4408	24.3554	NaN	NaN	NaN	NaN	NaN	NaN	NaN	NaN	NaN	NaN	NaN	NaN	NaN	NaN	25.4696	25.1844	25.8412	25.2955	22	22	52.8	70.9	0	203.44	2229300000	66
DERPT_G7682	Full=Dihydrolipoyllysine-residue succinyltransferase component of 2-oxoglutarate dehydrogenase complex ame: Full=2-oxoglutarate dehydrogenase complex component E2 Short=OGDC-E2 ame: Full=Dihydrolipoamide succinyltransferase component of 2-oxoglutarate dehy	2	4	NaN	NaN	NaN	NaN	NaN	NaN	NaN	NaN	NaN	NaN	NaN	25.6792	24.5291	NaN	NaN	NaN	NaN	NaN	NaN	NaN	27.1131	27.3408	26.3594	26.9242	10	10	10.7	178.24	0	203.34	4111600000	46
DERPT_G191	Full= flp ame: Full= mitochondrion	8	4	NaN	24.9155	27.9076	29.2514	30.0172	29.4441	26.9597	24.2882	NaN	NaN	NaN	NaN	NaN	NaN	NaN	NaN	24.883	NaN	NaN	NaN	28.1999	28.1102	28.6168	27.8316	20	20	61.8	46.924	0	202.04	20761000000	146
DERPT_G10370	Full=GDP-L-fucose synthase ame: Full=GDP-4-keto-6-deoxy-D-mannose-3,5-epimerase-4-reductase extracellular exosome,GDP-L-fucose synthase activity,coenzyme binding,GDP-mannose metabolic process,cytolysis,dsRNA transport,de novo GDP-L-fucose biosynthetic pr	3	4	NaN	NaN	NaN	NaN	NaN	NaN	26.6109	25.4233	23.8905	NaN	NaN	NaN	NaN	NaN	NaN	NaN	NaN	NaN	NaN	NaN	25.8015	25.9877	22.4209	25.9262	16	16	51	40.158	0	199.87	2251600000	47
DERPT_G11287	Full=Tripeptidyl-peptidase 2 Short=TPP-2 ame: Full=Tripeptidyl aminopeptidase ame: Full=Tripeptidyl-peptidase II Short=TPP-II vacuole,cytosol,membrane,serine-type endopeptidase activity,binding,tripeptidyl-peptidase activity,proteolysis,cellular process	5	4	NaN	NaN	22.0054	NaN	NaN	NaN	NaN	24.9098	NaN	NaN	NaN	23.9623	24.545	24.232	NaN	NaN	NaN	NaN	NaN	NaN	26.2649	27.2063	23.7164	27.0973	35	35	35.1	155.81	0	198.23	3102300000	70
DERPT_G6190	Full=Vesicle-fusing ATPase ame: Full=N-ethylmaleimide-sensitive fusion Short=NEM-sensitive fusion ame: Full=Vesicular-fusion NSF ER ubiquitin ligase complex,mitochondrion,lysosomal membrane,Golgi stack,cytosol,plasma membrane,synaptic vesicle,plasmodesma,p	4	4	NaN	NaN	NaN	NaN	NaN	NaN	NaN	NaN	23.5584	26.8621	26.7512	24.5491	NaN	NaN	NaN	NaN	NaN	NaN	NaN	NaN	25.5278	26.054	26.0571	25.8447	22	21	34.4	83.647	0	198.2	2805500000	59
DERPT_G8002	Full=Thyroglobulin Short=Tg Flags: Precursor extracellular region,plasma membrane part,protein binding,cellular process,hormone metabolic process,animal organ development,positive regulation of cellular process,response to stimulus	17	4	21.534	19.2626	21.9267	22.4913	23.6385	25.3397	27.6349	29.714	28.4105	25.3988	23.2624	25.0353	22.8906	NaN	NaN	23.2372	NaN	24.7019	24.1961	23.2758	25.5076	23.2111	26.3021	24.0493	11	11	65.2	17.287	0	197.66	8317900000	79
DERPT_G5265	Full=Myosin-10 ame: Full=Cellular myosin heavy type B ame: Full=Myosin heavy chain 10 ame: Full=Myosin heavy non-muscle IIb ame: Full=Non-muscle myosin heavy chain B Short=NMMHC-B ame: Full=Non-muscle myosin heavy chain IIb Short=NMMHC II-b Short=NMMHC-IIB	8	4	NaN	NaN	NaN	NaN	NaN	21.1988	23.8073	28.1372	26.8492	25.0634	25.257	26.0424	24.3158	NaN	NaN	NaN	NaN	NaN	NaN	NaN	23.0114	23.8479	23.5579	24.0088	30	30	17.7	232.44	0	197.08	2508900000	68
DERPT_G1073	Full=Heat shock 105 kDa ame: Full=Heat shock 110 kDa nucleus,cytoplasm,intracellular non-membrane-bounded organelle,intracellular organelle part,protein binding,negative regulation of protein phosphorylation,protein folding,multicellular organism developme	3	4	23.0204	NaN	NaN	NaN	NaN	22.525	23.3329	NaN	NaN	NaN	NaN	NaN	NaN	NaN	NaN	NaN	NaN	NaN	NaN	NaN	26.1715	27.4801	23.9009	27.5915	25	25	39.8	102.81	0	196.67	3936400000	85
DERPT_G9312	Full=Sodium potassium-transporting ATPase subunit alpha-1 Short=Na(+) K(+) ATPase alpha-1 subunit ame: Full=Sodium pump subunit alpha-1 Flags: Precursor nucleus,endosome,endoplasmic reticulum,Golgi apparatus,cytosol,sodium:potassium-exchanging ATPase compl	3	4	24.7391	NaN	NaN	NaN	NaN	NaN	NaN	NaN	22.2387	NaN	NaN	NaN	23.8944	NaN	NaN	NaN	NaN	NaN	NaN	NaN	25.9605	27.3865	24.3725	26.4787	36	30	32.8	152.8	0	196.51	2777500000	79
DERPT_G5897	Full=ATP-dependent RNA helicase eIF4A ame: Full=Eukaryotic initiation factor 4A Short=eIF-4A ame: Full=Translation initiation factor 1 nucleolus,cytosol,membrane,extracellular matrix,perinuclear region of cytoplasm,extracellular exosome,catalytic step 2 sp	9	4	26.9757	NaN	NaN	NaN	NaN	NaN	22.747	22.9799	24.57	26.9733	27.2094	25.9957	25.6898	NaN	NaN	NaN	NaN	NaN	NaN	24.5306	27.2156	27.9878	26.6988	27.6444	18	18	63.1	44.983	0	196.47	6686000000	82
DERPT_G10488	Full=Alcohol dehydrogenase mitochondrion,cytosol,apical plasma membrane,extracellular exosome,retinal dehydrogenase activity,alditol:NADP+ 1-oxidoreductase activity,estradiol 17-beta-dehydrogenase activity,protein binding,oxidoreductase activity, acting on	8	4	23.5787	NaN	NaN	NaN	NaN	NaN	21.3212	26.1468	29.5783	25.317	21.8334	NaN	21.2984	NaN	NaN	NaN	22.9048	NaN	NaN	NaN	27.3763	26.5671	27.2925	27.3838	20	20	54.9	38.625	0	196.09	8556400000	107
DERPT_G5571	Full=Cytochrome b-c1 complex subunit mitochondrial ame: Full=Complex III subunit 1 ame: Full=Core I ame: Full=Ubiquinol-cytochrome-c reductase complex core 1 Flags: Precursor cell wall,nucleolus,mitochondrial outer membrane,mitochondrial respiratory chain	5	4	NaN	NaN	22.7856	NaN	NaN	24.713	24.2852	25.2362	25.2177	NaN	NaN	NaN	NaN	NaN	NaN	NaN	NaN	NaN	NaN	NaN	26.7894	26.7149	24.3858	27.0942	18	18	60.3	54.774	0	195.96	3549900000	61
DERPT_G3110	---NA---	4	4	NaN	NaN	NaN	NaN	NaN	23.7454	28.216	27.1586	22.7613	NaN	NaN	NaN	NaN	NaN	NaN	NaN	NaN	NaN	NaN	NaN	24.1948	24.1266	24.7057	24.8072	17	17	40.5	53.343	0	194.55	3229900000	41
DERPT_G10030	Full= argonaute-2 Short=Argonaute2 ame: Full=Argonaute RISC catalytic component 2 ame: Full=Eukaryotic translation initiation factor 2C 2 Short=eIF-2C 2 Short=eIF2C 2 ame: Full= slicer nucleus,ribonucleoprotein complex,cytoplasmic part,RNA binding,protein	7	4	NaN	NaN	NaN	NaN	NaN	25.047	28.4906	27.96	24.9631	NaN	NaN	NaN	26.2138	25.0645	NaN	NaN	NaN	24.3421	NaN	NaN	26.8664	26.7809	27.1788	27.1134	43	42	53.4	105.29	0	193.88	7723000000	129
DERPT_G4903	---NA---	12	4	27.0633	24.0774	24.0295	24.1824	25.2002	24.7827	23.9108	26.8932	28.4966	25.6994	23.6886	NaN	NaN	NaN	25.5403	NaN	NaN	NaN	NaN	NaN	24.5181	24.472	24.5558	24.6934	10	10	28.9	31.085	0	193.39	3907600000	41
DERPT_G6380	Full=Integrin beta-1 ame: Full=Fibronectin receptor subunit beta ame: Full=VLA-4 subunit beta ame: CD_antigen=CD29 Flags: Precursor focal adhesion,muscle tendon junction,external side of plasma membrane,basal plasma membrane,endomembrane system,intercalate	8	4	29.3801	25.3279	26.1318	21.7199	21.8003	23.3275	23.2996	NaN	NaN	NaN	NaN	23.0996	NaN	NaN	NaN	NaN	NaN	NaN	NaN	NaN	26.5706	26.5163	25.6965	27.0297	26	26	37.5	95.438	0	193.02	4027700000	109
DERPT_G7596	Full=Single-stranded DNA-binding Short=SSB mitochondrial nucleoid,single-stranded DNA binding,DNA replication,mitochondrion morphogenesis	13	4	23.2901	NaN	NaN	23.7669	24.0805	27.9532	29.3154	26.2904	NaN	NaN	NaN	NaN	22.891	NaN	25.3872	26.2266	27.376	26.4358	27.1668	26.818	26.9271	26.8059	27.7999	26.7774	6	6	39.1	20.976	0	192.73	7977600000	43
DERPT_G8248	secreted salivary gland [Ixodes scapularis] salivary [Ixodes scapularis] secreted salivary gland	11	4	NaN	19.2396	18.4166	NaN	NaN	NaN	NaN	19.8766	23.7824	29.9331	28.9079	25.3799	20.8714	NaN	20.6522	21.1112	21.0201	NaN	NaN	NaN	22.8552	22.0527	23.5409	22.4984	16	16	60.5	27.95	0	192.32	5297900000	53
DERPT_G1125	Full=10 kDa chaperonin ame: Full= ame: Full= Cpn10 mitochondrial matrix,membrane,extracellular exosome,copper ion binding,unfolded protein binding,chaperone binding,organic cyclic compound binding,heterocyclic compound binding,osteoblast differentiation,re	16	4	21.5893	23.3101	23.0044	22.9382	24.9533	29.865	31.7956	29.4793	26.1632	24.1843	19.0464	24.3643	26.1115	27.5149	26.1357	23.4594	NaN	NaN	NaN	NaN	26.4146	24.9866	27.1941	26.0511	17	17	88.2	11.196	0	189.99	29025000000	116
DERPT_G8127	Der f27 like allergen; Full=Corticosteroid-binding globulin Short=CBG ame: Full=Serpin A6 ame: Full=Transcortin Flags: Precursor extracellular space,cell part,endopeptidase inhibitor activity,protein binding,negative regulation of biosynthetic process,positive regulation of sign	0	4	NaN	NaN	NaN	NaN	NaN	NaN	NaN	NaN	NaN	NaN	NaN	NaN	NaN	NaN	NaN	NaN	NaN	NaN	NaN	NaN	29.4581	28.8593	29.7631	29.1507	9	9	37.8	43.326	0	189.99	19688000000	54
DERPT_G1443	Full=Kynurenine--oxoglutarate transaminase 3 ame: Full=Cysteine-S-conjugate beta-lyase 2 ame: Full=Kynurenine aminotransferase 3 ame: Full=Kynurenine aminotransferase III Short=KATIII ame: Full=Kynurenine--glyoxylate transaminase ame: Full=Kynurenine--oxog	3	4	NaN	NaN	NaN	NaN	NaN	NaN	27.5271	27.7648	24.7856	NaN	NaN	NaN	NaN	NaN	NaN	NaN	NaN	NaN	NaN	NaN	27.5703	27.9931	27.7361	27.7935	22	22	35	78.821	0	189.49	8532100000	90
DERPT_G8150	Full=Succinate-- ligase cell wall,mitochondrial inner membrane,cytosol,plasma membrane,succinate-CoA ligase complex (GDP-forming),extracellular exosome,succinate-CoA ligase (ADP-forming) activity,succinate-CoA ligase (GDP-forming) activity,copper ion bindi	17	4	23.3761	NaN	21.7486	22.0496	22.0921	23.5182	25.4282	27.3144	29.1275	30.2201	27.0548	26.2493	27.075	26.663	25.8403	25.9076	25.7834	25.4152	NaN	NaN	28.8215	29.1455	27.0197	29.2387	18	18	43.9	35.677	0	189.18	20897000000	120
DERPT_G557	Full=Cytochrome b-c1 complex subunit mitochondrial ame: Full=Complex III subunit 2 ame: Full=Core II ame: Full=Ubiquinol-cytochrome-c reductase complex core 2 Flags: Precursor mitochondrial inner membrane,plastid,intracellular organelle lumen,respiratory c	12	4	24.6755	NaN	NaN	NaN	NaN	22.7865	23.5595	23.5943	21.5039	NaN	NaN	25.2996	27.5541	26.0829	27.2206	25.2597	23.3279	22.6366	NaN	NaN	28.4059	29.037	26.362	29.0096	19	19	71.6	49.54	0	188.19	11862000000	119
DERPT_G3807	Full=Alanine aminotransferase 2 Short=ALT2 ame: Full=Glutamate pyruvate transaminase 2 Short=GPT 2 ame: Full=Glutamic--alanine transaminase 2 ame: Full=Glutamic--pyruvic transaminase 2 extracellular space,nucleus,mitochondrion,peroxisome,cytosol,plant-type	6	4	NaN	NaN	NaN	NaN	NaN	22.3617	28.3451	27.943	23.2031	NaN	NaN	21.5325	24.955	NaN	NaN	NaN	NaN	NaN	NaN	NaN	26.301	26.0855	25.4344	26.0242	23	22	16.5	193.53	0	187.91	5032300000	75
DERPT_G5923	Full=Nuclear transport factor 2 Short=NTF-2 cytosol,plasma membrane,nuclear membrane,membrane part,protein transmembrane transporter activity,Ran GTPase binding,protein import into nucleus,multicellular organism development,regulation of biological process	8	4	NaN	NaN	NaN	NaN	NaN	NaN	NaN	NaN	27.3396	27.3347	26.4795	26.7468	26.0574	28.0698	27.493	NaN	26.1564	NaN	NaN	NaN	27.5354	26.5581	27.468	26.5603	7	7	95.3	14.665	0	187.73	7454400000	65
DERPT_G11509	Full=Probable Xaa-Pro aminopeptidase P Short=AMPP Short=Aminopeptidase P ame: Full=Aminoacylproline aminopeptidase ame: Full=Prolidase cytosol,extracellular exosome,manganese ion binding,protein homodimerization activity,metalloaminopeptidase activity,prot	4	4	NaN	NaN	NaN	24.2582	27.5144	27.2877	25.4572	NaN	NaN	NaN	NaN	NaN	NaN	NaN	NaN	NaN	NaN	NaN	NaN	NaN	25.7605	26.0859	25.4383	26.4066	25	25	26.6	147.8	0	187.49	3563500000	80
DERPT_G5389	Full=GMP reductase ame: Full=Guanosine 5 -monophosphate oxidoreductase Short=Guanosine monophosphate reductase cytoplasm,GMP reductase complex,GMP reductase activity,metal ion binding,nematode larval development,purine nucleobase metabolic process,embryo d	14	4	NaN	22.6081	22.9042	26.6649	28.741	29.0828	25.8963	23.3255	23.7083	22.1401	23.2524	24.5382	24.2488	21.7586	NaN	NaN	23.201	NaN	NaN	NaN	26.9809	26.559	27.2498	26.6573	28	28	88	38.3	0	186.87	8127000000	114
DERPT_G8988	---NA---	14	4	NaN	NaN	22.7139	NaN	NaN	NaN	NaN	23.9889	28.116	30.8971	29.8793	27.6777	29.5091	29.7673	28.3482	26.6818	27.1879	26.178	25.6257	24.967	23.9669	21.8816	26.2202	23.6163	7	6	45.6	21.931	0	184.55	12670000000	55
DERPT_G7319	Full=S-methyl-5 -thioadenosine phosphorylase ame: Full=5 -methylthioadenosine phosphorylase Short=MTA phosphorylase Short=MTAP Short=MTAPase intracellular organelle,cytoplasmic part,extracellular exosome,protein binding,antioxidant activity,oxidoreductase	10	4	NaN	NaN	NaN	24.3948	24.9019	26.3077	27.4589	28.604	27.5645	27.3317	25.5492	24.6888	24.7083	NaN	NaN	NaN	NaN	NaN	NaN	NaN	27.3993	26.9796	27.7636	27.0907	14	14	54.4	30.151	0	184.03	10067000000	88
DERPT_G10494	Full=UDP-glucuronosyltransferase 3A1 Short=UDPGT 3A1 Flags: Precursor membrane,membrane-bounded organelle,UDP-glycosyltransferase activity,transferase activity, transferring hexosyl groups,lipid metabolic process,nervous system development,cellular compone	0	4	NaN	NaN	NaN	NaN	NaN	NaN	NaN	NaN	NaN	NaN	NaN	NaN	NaN	NaN	NaN	NaN	NaN	NaN	NaN	NaN	26.741	26.9092	24.6008	26.8691	13	13	55.6	50.535	0	183.48	2938800000	59
DERPT_G3561	Full=Breast cancer anti-estrogen resistance 3 nucleus,cytoplasm,cell-cell junction,adherens junction,protein kinase activity,guanyl-nucleotide exchange factor activity,beta-catenin binding,protein binding, bridging,signaling adaptor activity,ion binding,sm	5	4	NaN	NaN	NaN	NaN	NaN	NaN	NaN	NaN	22.964	26.084	26.8687	24.9071	24.4227	NaN	NaN	NaN	NaN	NaN	NaN	NaN	24.2973	24.4631	25.0211	25.5583	9	9	13.3	93.364	0	183.39	1689700000	33
DERPT_G9264	Full=Methionine aminopeptidase 1 Short=MAP 1 Short= 1 ame: Full=Peptidase M 1 nucleus,mitochondrion,chloroplast,cytoplasmic stress granule,cytosolic ribosome,mRNA binding,iron ion binding,nickel cation binding,manganese ion binding,cobalt ion binding,metal	7	4	NaN	NaN	21.219	NaN	NaN	21.8689	24.1496	25.8479	28.309	27.3994	24.5533	NaN	NaN	NaN	NaN	NaN	NaN	NaN	NaN	NaN	25.6813	25.5377	25.3115	25.5135	19	19	70.1	43.658	0	183.23	3883700000	78
DERPT_G3121	Full= mitochondrial ame: Full=Glycine cleavage system T Short=GCVT Flags: Precursor mitochondrial inner membrane,chloroplast thylakoid,chloroplast stroma,chloroplast envelope,cytosolic ribosome,apoplast,aminomethyltransferase activity,glycine dehydrogenase	13	4	NaN	NaN	NaN	22.0962	NaN	22.4737	23.6152	26.1573	29.9855	27.4587	24.0787	22.0544	23.8293	22.748	22.1295	22.1901	22.0316	NaN	NaN	NaN	28.118	27.9918	26.6122	28.1321	24	24	51.6	45.924	0	182.25	11786000000	124
DERPT_G8650	Full=Dipeptidyl peptidase 2 ame: Full=Dipeptidyl aminopeptidase II ame: Full=Dipeptidyl peptidase 7 ame: Full=Dipeptidyl peptidase II Short=DPP II ame: Full=Quiescent cell proline dipeptidase Flags: Precursor endomembrane system,cytoplasmic vesicle,intrace	16	4	25.1638	NaN	26.3859	26.2695	27.0131	28.5287	29.144	28.9627	26.7098	26.13	24.9651	24.6489	26.1809	26.4704	27.303	24.3745	25.2391	NaN	NaN	NaN	27.9044	29.4227	26.9737	28.2746	28	28	52.1	57.216	0	182.08	18486000000	156
DERPT_G11629	Full=Dihydrolipoyllysine-residue acetyltransferase component of pyruvate dehydrogenase complex ame: Full=Dihydrolipoamide acetyltransferase component of pyruvate dehydrogenase complex ame: Full=E2 mitochondrial matrix,binding,acetyltransferase activity,S-a	7	4	NaN	23.2839	29.4757	27.2396	NaN	NaN	NaN	23.9825	NaN	NaN	23.4153	25.305	24.1521	NaN	NaN	NaN	NaN	NaN	NaN	NaN	25.7715	25.6614	25.7529	25.3168	11	11	27.8	59.322	0	181.86	4818400000	68
DERPT_G11743	Full=Long-chain-fatty-acid-- ligase ame: Full=Long-chain acyl- synthetase Short=Acyl- synthetase intracellular part,ligase activity, forming carbon-sulfur bonds,response to stress,response to fungus,monocarboxylic acid metabolic process,cellular biosynthet	7	4	NaN	NaN	22.2368	NaN	25.4458	24.543	25.4589	26.6196	27.3858	25.3615	NaN	NaN	NaN	NaN	NaN	NaN	NaN	NaN	NaN	NaN	27.8012	27.6723	27.7413	27.1173	18	18	22.7	136.29	0	181.61	7346500000	81
DERPT_G5020	Full=Arf-GAP with coiled- ANK repeat and PH domain-containing 2 ame: Full=Centaurin-beta-2 Short=Cnt-b2 annulate lamellae,nuclear pore,mitochondrion,endoplasmic reticulum membrane,endosome membrane,cytosolic ribosome,dendrite,neuronal cell body,extracellul	4	4	NaN	NaN	NaN	NaN	NaN	NaN	NaN	NaN	26.4001	27.6236	27.1139	26.3234	NaN	NaN	NaN	NaN	NaN	NaN	NaN	NaN	28.0049	28.5142	27.417	28.1362	14	14	11.6	111.96	0	181.55	10114000000	71
DERPT_G8335	Full=Septum formation Maf nucleoside-triphosphate diphosphatase activity,purine nucleobase metabolic process,pyrimidine nucleobase metabolic process	0	4	NaN	NaN	NaN	NaN	NaN	NaN	NaN	NaN	NaN	NaN	NaN	NaN	NaN	NaN	NaN	NaN	NaN	NaN	NaN	NaN	24.8845	24.5731	25.3401	24.4932	12	12	49.6	28.775	0	180.45	1448800000	30
DERPT_G10543	Full=Glutamate--cysteine ligase ame: Full=Gamma-ECS Short=GCS ame: Full=Gamma-glutamylcysteine synthetase nucleus,cytosol,glutamate-cysteine ligase complex,perinuclear region of cytoplasm,glutamate-cysteine ligase activity,purine ribonucleoside binding,ade	10	4	NaN	NaN	23.3188	25.711	26.5515	28.333	28.3626	26.4325	24.7343	23.3051	NaN	NaN	26.3517	26.0274	NaN	NaN	NaN	NaN	NaN	NaN	25.7447	25.8584	25.917	25.5631	26	26	34	86.626	0	180.38	6517700000	104
DERPT_G1043	Full=Proteasome-activating nucleotidase Short=PAN ame: Full=Proteasomal ATPase ame: Full=Proteasome regulatory ATPase ame: Full=Proteasome regulatory particle transcription factor TFIIH holo complex,microtubule associated complex,plasma membrane,proteasome	8	4	NaN	NaN	25.85	28.7548	27.4909	28.6304	24.5541	24.5212	NaN	NaN	NaN	26.4904	24.5691	NaN	NaN	NaN	NaN	NaN	NaN	NaN	24.5737	27.061	25.8898	25.126	16	16	45.8	45.388	0	179.16	6258800000	53
DERPT_G11336	Full=Proline--tRNA ligase ame: Full=Prolyl-tRNA synthetase Short= mitochondrion,proline-tRNA ligase activity,ATP binding,prolyl-tRNA aminoacylation,arginine metabolic process,proline metabolic process	7	4	NaN	NaN	24.6222	24.5043	26.9659	28.6859	25.795	NaN	NaN	NaN	NaN	22.9704	NaN	23.1943	NaN	NaN	NaN	NaN	NaN	NaN	25.2824	24.4913	25.0543	25.2597	26	26	48.2	69.309	0	178.95	3952100000	78
DERPT_G7161	Full=Threonine--tRNA cytoplasmic ame: Full=Threonyl-tRNA synthetase Short= cell wall,mitochondrion,Golgi apparatus,cytosol,plasma membrane,chloroplast,actin cytoskeleton,extracellular exosome,RNA binding,threonine-tRNA ligase activity,ATP binding,threonyl-	7	4	25.3993	NaN	23.6469	25.0791	25.0393	27.3966	26.4685	24.8056	NaN	NaN	NaN	NaN	NaN	NaN	NaN	NaN	NaN	NaN	NaN	NaN	26.8252	27.5868	25.9802	26.7098	30	28	24.2	180.09	0	178.85	6063800000	78
DERPT_G3774	Full=Electron transfer flavo subunit mitochondrial Short=Alpha-ETF Flags: Precursor cell wall,cytosol,plasma membrane,mitochondrial electron transfer flavoprotein complex,extracellular exosome,fatty-acyl-CoA binding,acyl-CoA dehydrogenase activity,copper i	5	4	NaN	NaN	NaN	NaN	NaN	NaN	25.6542	24.2148	22.1779	NaN	NaN	23.5775	24.5109	NaN	NaN	NaN	NaN	NaN	NaN	NaN	28.7702	28.5154	25.8006	28.7647	19	19	71.3	37.015	0	178.7	10295000000	118
DERPT_G388	Full=26S proteasome regulatory subunit rpn2 spindle pole,nuclear envelope,microtubule organizing center,plasma membrane,cell cortex,proteasome regulatory particle, base subcomplex,proteasome storage granule,extracellular exosome,endopeptidase activity,zinc	7	4	23.9765	NaN	24.7511	24.547	23.6543	24.9167	24.3456	24.2592	NaN	NaN	NaN	NaN	NaN	NaN	NaN	NaN	NaN	NaN	NaN	NaN	24.6733	26.186	23.6956	25.7203	20	20	17.2	216.6	0	177.77	2040000000	69
DERPT_G9506	Full=Glucose-6-phosphate 1-dehydrogenase Short=G6PD nucleus,centrosome,cytosol,chloroplast,cytoplasmic side of plasma membrane,extracellular exosome,glucose-6-phosphate dehydrogenase activity,glucose binding,protein homodimerization activity,NADP binding,a	9	4	24.58	NaN	23.8811	23.3643	24.4164	26.3708	27.5709	26.7783	23.8384	NaN	NaN	23.3235	NaN	NaN	NaN	NaN	NaN	NaN	NaN	NaN	27.1427	27.96	25.2648	27.5538	27	26	41.2	87.657	0	176.5	7540900000	91
DERPT_G5413	Full=40S ribosomal S5 nuclear chromosome,cell wall,nucleolus,vacuolar membrane,microtubule associated complex,plasma membrane,focal adhesion,plasmodesma,chloroplast,cytosolic small ribosomal subunit,90S preribosome,extracellular matrix,extracellular exosom	6	4	26.7898	24.1275	24.8329	24.3324	24.3426	22.236	NaN	NaN	NaN	NaN	NaN	NaN	NaN	NaN	NaN	NaN	NaN	NaN	NaN	NaN	24.9688	26.9792	24.5843	25.8296	12	8	53.1	23.229	0	176.04	3003300000	70
DERPT_G5450	Full=Sodium potassium-transporting ATPase subunit beta-1 ame: Full=Sodium potassium-dependent ATPase subunit beta-1 nucleus,sodium:potassium-exchanging ATPase complex,septate junction,axon,plasma membrane region,RNA binding,sodium:potassium-exchanging ATPa	18	4	29.0969	25.4581	25.4343	25.9996	25.0323	24.4003	NaN	24.1853	28.2341	27.3184	24.9839	25.6236	28.9226	30.4554	29.7288	28.9049	27.9598	26.7636	26.148	NaN	29.5028	31.0544	27.8831	30.273	25	25	28.6	85.879	0	175.45	31744000000	165
DERPT_G458	Full=T-complex 1 subunit alpha Short=TCP-1-alpha ame: Full=CCT-alpha pericentriolar material,acrosomal vesicle,zona pellucida receptor complex,nuclear heterochromatin,Golgi apparatus,chaperonin-containing T-complex,microtubule,microtubule associated comple	6	4	26.4296	28.0644	27.9935	25.2578	21.8825	NaN	NaN	NaN	NaN	NaN	NaN	NaN	NaN	21.8055	NaN	NaN	NaN	NaN	NaN	NaN	24.9077	26.3715	23.7481	25.1439	28	28	67.4	60.014	0	175.28	2843000000	97
DERPT_G1054	Full=Cystathionine gamma-synthase Short=CGS ame: Full=O-succinylhomoserine (thiol)-lyase nucleus,endoplasmic reticulum,cytosol,plasma membrane,extracellular exosome,cystathionine gamma-synthase activity,cystathionine beta-lyase activity,cystathionine gamma	6	4	21.4091	NaN	22.0231	23.9599	27.585	28.3805	22.9109	NaN	NaN	NaN	NaN	NaN	NaN	NaN	NaN	NaN	NaN	NaN	NaN	NaN	25.5882	25.5976	27.1279	26.6179	13	13	61.7	44.245	0	174.63	5313400000	57
DERPT_G1115	Full=Neutral ceramidase Short=N-CDase Short=NCDase ame: Full=Acylsphingosine deacylase 2 ame: Full=N-acylsphingosine amidohydrolase 2 Contains: ame: Full=Neutral ceramidase soluble form Golgi membrane,extracellular region,mitochondrion,endoplasmic reticulu	3	4	25.497	NaN	NaN	NaN	NaN	NaN	25.5041	25.7959	NaN	NaN	NaN	NaN	NaN	NaN	NaN	NaN	NaN	NaN	NaN	NaN	25.5919	25.8665	25.2771	25.6691	17	17	36.3	79.003	0	174.45	2282900000	44
DERPT_G6016	Proposed Eur-Allergen, Allergen homolog (Der f29 like allergen): Full=Peptidyl-prolyl cis-trans isomerase B Short=PPIase B ame: Full=Rotamase B Flags: Precursor nucleus,endoplasmic reticulum lumen,smooth endoplasmic reticulum,focal adhesion,membrane,endopl	8	4	25.3369	NaN	NaN	25.5695	24.7855	NaN	NaN	NaN	24.9897	28.4677	28.4537	25.4233	25.6898	NaN	NaN	NaN	NaN	NaN	NaN	NaN	26.8051	28.0236	26.8723	27.6935	11	11	58.5	21.976	0	174.39	8963900000	54
DERPT_G148	Full=Beta-phosphoglucomutase Short=Beta-PGM mitochondrion,cytosol,extracellular exosome,transferase activity, transferring phosphorus-containing groups,glycerol-3-phosphatase activity,metal ion binding,glycerol biosynthetic process,dephosphorylation,wound	5	4	NaN	NaN	NaN	NaN	NaN	NaN	NaN	23.8936	27.7286	27.3834	26.2449	NaN	26.2379	NaN	NaN	NaN	NaN	NaN	NaN	NaN	24.6019	25.6483	23.8162	25.5642	17	17	66	34.282	0	174.02	3149000000	57
DERPT_G11609	Full=Gamma-interferon-inducible lysosomal thiol reductase ame: Full=Gamma-interferon-inducible IP-30 ame: Full=Legumaturain Flags: Precursor cytoplasm,oxidoreductase activity,immune system process	13	4	NaN	NaN	23.7486	NaN	NaN	21.2936	21.9522	NaN	NaN	24.9146	29.3698	32.0122	30.5168	27.5399	26.6626	26.243	27.2175	26.9857	24.5559	NaN	29.065	28.85	29.6112	28.6534	8	6	57.6	21.485	0	173.22	29518000000	95
DERPT_G3119	Full=Viral cathepsin Short=V-cath ame: Full=Cysteine ase Short=CP Flags: Precursor extracellular region,vacuole,cytoplasmic ribonucleoprotein granule,cysteine-type peptidase activity,proteolysis,defense response to other organism	12	4	NaN	NaN	NaN	21.8268	23.4218	26.4259	25.029	24.7004	27.2835	27.0934	24.3095	24.5232	22.9971	NaN	NaN	NaN	23.3054	25.2867	NaN	NaN	27.3875	27.0817	26.6174	27.0043	9	9	32.4	42.124	0	173.07	5836400000	40
DERPT_G8296	Full=ATP-dependent RNA helicase DBP5 polysome,cellular bud tip,membrane,preribosome, large subunit precursor,chromatoid body,nuclear pore cytoplasmic filaments,inositol hexakisphosphate binding,RNA binding,ATP-dependent RNA helicase activity,ATP binding,tr	4	4	NaN	NaN	NaN	NaN	NaN	NaN	NaN	NaN	24.6095	27.0713	26.6153	25.3004	NaN	NaN	NaN	NaN	NaN	NaN	NaN	NaN	24.5974	25.1552	24.3004	25.2127	17	17	41.1	52.215	0	172.31	1930600000	38
DERPT_G11015	Full=AP-2 complex subunit beta ame: Full=AP105B ame: Full=Adaptor complex AP-2 subunit beta ame: Full=Adaptor-related complex 2 subunit beta ame: Full=Beta-2-adaptin ame: Full=Beta-adaptin ame: Full=Clathrin assembly complex 2 beta large chain ame: Full=Pl	3	4	NaN	NaN	NaN	NaN	NaN	NaN	NaN	NaN	NaN	27.1971	27.346	26.7841	NaN	NaN	NaN	NaN	NaN	NaN	NaN	NaN	27.091	27.1452	26.9769	27.2367	27	27	43.4	103.84	0	171.21	5858600000	75
DERPT_G6349	Full=Oxygen-dependent choline dehydrogenase Short=CDH Short=CHD ame: Full=Betaine aldehyde dehydrogenase Short=BADH oxidoreductase activity, acting on CH-OH group of donors,flavin adenine dinucleotide binding,oxidation-reduction process	5	4	NaN	NaN	25.2866	25.3795	27.0768	27.9984	25.652	NaN	NaN	NaN	NaN	NaN	NaN	NaN	NaN	NaN	NaN	NaN	NaN	NaN	25.7647	24.5897	26.9574	25.6373	9	9	25.7	67.795	0	171.18	3993900000	53
DERPT_G7031	Full=Omega-amidase NIT2 ame: Full=Nitrilase homolog 2 nucleus,mitochondrion,plastid,extracellular exosome,nitrilase activity,bis(5-adenosyl)-triphosphatase activity,response to cadmium ion,nitrile metabolic process,purine nucleobase metabolic process	2	4	NaN	NaN	NaN	NaN	NaN	NaN	25.9532	23.4322	NaN	NaN	NaN	NaN	NaN	NaN	NaN	NaN	NaN	NaN	NaN	NaN	25.8303	25.9763	24.6047	26.2134	18	18	16.3	180.21	0	170.57	2173900000	67
DERPT_G699	Full= Wnt-5b Flags: Precursor extracellular matrix,extracellular space,cytoplasm,cell surface,extracellular exosome,DNA-binding transcription factor activity,transcription corepressor activity,frizzled binding,receptor tyrosine kinase-like orphan receptor	5	4	23.0779	NaN	NaN	NaN	NaN	NaN	NaN	NaN	24.728	25.611	24.6579	23.8898	NaN	NaN	NaN	NaN	NaN	NaN	NaN	NaN	24.3466	23.9993	24.9136	23.6315	6	6	14.9	71.871	0	169.58	928980000	18
DERPT_G12526	: Full=Antithrombin-III Short=ATIII ame: Full=Serpin C1 Flags: Precursor extracellular space,cytoplasm,binding,peptidase inhibitor activity,regulation of protein metabolic process	5	4	23.4849	NaN	NaN	NaN	NaN	NaN	23.0353	24.9909	26.432	26.4153	NaN	NaN	NaN	NaN	NaN	NaN	NaN	NaN	NaN	NaN	30.0185	29.0862	30.4757	29.6726	13	12	76.7	27.312	0	168.23	29624000000	99
DERPT_G3317	Full=Glutamate--cysteine ligase regulatory subunit ame: Full=GCS light chain ame: Full=Gamma-ECS regulatory subunit ame: Full=Gamma-glutamylcysteine synthetase regulatory subunit ame: Full=Glutamate--cysteine ligase modifier subunit glutamate-cysteine liga	5	4	NaN	NaN	NaN	NaN	24.2086	25.792	25.5779	23.961	24.1125	NaN	NaN	NaN	NaN	NaN	NaN	NaN	NaN	NaN	NaN	NaN	24.7309	24.6679	24.8588	25.0752	8	8	48.9	31.073	0	167.96	1651100000	38
DERPT_G4212	Full=Glutamate decarboxylase 1 ame: Full=67 kDa glutamic acid decarboxylase Short=GAD-67 ame: Full=Glutamate decarboxylase 67 kDa isoform mitochondrion,Golgi apparatus,cytosol,plasma membrane,cell cortex,axon,synaptic vesicle membrane,anchored component of	8	4	22.6576	NaN	NaN	NaN	NaN	23.5235	27.7416	27.0632	22.9872	NaN	24.856	26.1234	25.8588	NaN	NaN	NaN	NaN	NaN	NaN	NaN	25.7212	26.3329	24.3015	26.6183	16	16	45.1	58.722	0	167.71	4330000000	74
DERPT_G10544	Full=Sensory neuron membrane 1 intracellular membrane-bounded organelle,cytoplasmic part,plasma membrane part,signaling receptor activity,binding,positive regulation of cytokine production,system process,lipid transport,signal transduction,positive regulat	5	4	29.5773	24.3565	23.9688	22.1161	NaN	NaN	NaN	NaN	NaN	NaN	NaN	NaN	21.0415	NaN	NaN	NaN	NaN	NaN	NaN	NaN	24.8051	24.4031	24.7603	24.4654	21	21	68.3	53.051	0	167.45	1924700000	56
DERPT_G11826	Full=Dolichyl-diphosphooligosaccharide-- glycosyltransferase subunit 1 ame: Full=Dolichyl-diphosphooligosaccharide-- glycosyltransferase 67 kDa subunit ame: Full=Ribophorin I Short=RPN-I ame: Full=Ribophorin-1 Flags: Precursor vacuolar membrane,rough endop	2	3	NaN	NaN	NaN	NaN	NaN	NaN	NaN	NaN	NaN	24.3529	23.6224	NaN	NaN	NaN	NaN	NaN	NaN	NaN	NaN	NaN	24.8034	25.8086	NaN	25.7516	16	16	48.2	53.936	0	167.18	1259200000	42
DERPT_G1481	Full=Mesencephalic astrocyte-derived neurotrophic factor homolog ame: Full=MANF CDNF Flags: Precursor extracellular space,nucleus,endoplasmic reticulum,ribonucleoprotein complex,calcium ion binding,protein binding,mRNA 3-UTR AU-rich region binding,vasocon	8	4	NaN	NaN	NaN	NaN	24.1611	NaN	24.396	21.7035	24.5034	28.7033	26.9691	27.3547	23.9944	NaN	NaN	NaN	NaN	NaN	NaN	NaN	24.6173	25.1641	24.8269	25.0587	12	12	18.9	68.526	0	167	3276100000	31
DERPT_G10356	Der f eukaryotic aspartyl protease like allergen;Allergen homolog (Blo t 2, Aed a 11): Full=Cathepsin D Flags: Precursor extracellular space,mitochondrion,lysosome,endosome,alveolar lamellar body,aspartic-type endopeptidase activity,protein homodimerizati	17	4	NaN	NaN	26.2092	26.5943	27.0256	26.1781	25.5416	26.2629	27.3699	24.5299	23.9745	25.2322	26.4272	27.8134	28.8803	29.445	28.8266	28.2908	28.5246	NaN	28.7666	28.6605	28.1812	28.9094	18	18	62.2	42.903	0	166.75	17964000000	137
DERPT_G1507	---NA---	9	4	22.9958	NaN	22.7802	NaN	21.7613	25.3087	28.2071	28.5025	26.3262	NaN	NaN	NaN	22.7259	23.8741	NaN	NaN	NaN	NaN	NaN	NaN	26.7608	25.8361	24.5821	26.0419	6	6	49.7	17.265	0	166.16	6074200000	62
DERPT_G11914	---NA---	5	4	NaN	NaN	NaN	NaN	NaN	NaN	NaN	NaN	24.602	25.6693	28.0458	28.1857	25.986	NaN	NaN	NaN	NaN	NaN	NaN	NaN	25.6472	25.7989	25.7012	25.6247	16	15	27.7	60.51	0	166.08	2984000000	51
DERPT_G10916	Full=Kynurenine formamidase Short=KFA Short=KFase ame: Full=Arylformamidase ame: Full=N-formylkynurenine formamidase Short=FKF arylformamidase activity,tryptophan catabolic process to kynurenine,glyoxylate metabolic process	3	4	NaN	NaN	NaN	24.4031	NaN	NaN	NaN	26.1985	24.65	NaN	NaN	NaN	NaN	NaN	NaN	NaN	NaN	NaN	NaN	NaN	25.9835	26.0448	26.981	25.9046	11	11	69	28.93	0	166	3061100000	53
DERPT_G10905	Full=40S ribosomal S21 cytosolic small ribosomal subunit,structural constituent of ribosome,ribosome binding,protein N-terminus binding,reproduction,endonucleolytic cleavage in ITS1 to separate SSU-rRNA from 5.8S rRNA and LSU-rRNA from tricistronic rRNA tr	14	4	NaN	NaN	23.7484	NaN	NaN	24.9913	22.7903	23.4244	27.3934	26.4269	25.3805	28.6286	29.0096	28.9279	27.6716	26.1724	26.3089	26.1821	NaN	NaN	25.399	25.1863	25.5636	25.1529	6	6	55.7	11.649	0	165.82	4538500000	37
DERPT_G9935	Full=ATP-dependent 6- muscle type Short=ATP-PFK Short=PFK-M ame: Full=6-phosphofructokinase type A ame: Full=Phosphofructo-1-kinase isozyme A Short=PFK-A ame: Full=Phosphohexokinase 6-phosphofructokinase complex,apical plasma membrane,extracellular exosome	0	4	NaN	NaN	NaN	NaN	NaN	NaN	NaN	NaN	NaN	NaN	NaN	NaN	NaN	NaN	NaN	NaN	NaN	NaN	NaN	NaN	24.5634	25.2839	24.0803	24.6431	15	15	34.2	92.01	0	164.52	917550000	38
DERPT_G2884	Allergen homolog (Pen c19, Tyr p28, Der f28, Cor a10), Proposed Pan-Allergen: Full=Heat shock cognate 71 kDa ame: Full=Heat shock 70 kDa 8 ubiquitin ligase complex,Prp19 complex,photoreceptor inner segment,zona pellucida receptor complex,spliceosomal compl	8	4	NaN	NaN	NaN	22.995	22.8458	24.2394	24.6322	24.7211	26.8867	25.8525	25.8321	NaN	NaN	NaN	NaN	NaN	NaN	NaN	NaN	NaN	23.7523	25.9242	23.4927	23.9893	25	19	43	70.617	0	164.28	1945300000	45
DERPT_G5603	Full=Trans-aconitate 2-methyltransferase	4	4	NaN	NaN	NaN	NaN	NaN	23.6379	27.5396	27.6634	23.4893	NaN	NaN	NaN	NaN	NaN	NaN	NaN	NaN	NaN	NaN	NaN	25.6455	24.2593	24.4904	25.1752	12	12	58.8	34.125	0	163.17	3158600000	39
DERPT_G6821	Full=Arylsulfatase I Short=ASI Flags: Precursor cell surface,endomembrane system,membrane,intracellular membrane-bounded organelle,cytoplasmic part,sulfuric ester hydrolase activity,nervous system development,response to chemical,primary metabolic process,	5	4	NaN	NaN	NaN	NaN	NaN	23.9759	25.3756	27.7809	28.1715	24.0036	NaN	NaN	NaN	NaN	NaN	NaN	NaN	NaN	NaN	NaN	26.6602	26.2145	27.1907	26.3102	23	23	32.3	90.945	0	161.5	6334100000	82
DERPT_G3304	Full=N-acetylglucosamine-6-phosphate deacetylase Short= c 6-P deacetylase nucleus,N-acetylglucosamine-6-phosphate deacetylase activity,metal ion binding,N-acetylglucosamine catabolic process,N-acetylneuraminate catabolic process	3	4	NaN	NaN	24.6998	26.3111	24.0972	NaN	NaN	NaN	NaN	NaN	NaN	NaN	NaN	NaN	NaN	NaN	NaN	NaN	NaN	NaN	25.2591	25.6854	24.3742	25.3889	14	14	52.5	44.904	0	160.4	1582700000	42
DERPT_G491	Full=Calsequestrin-2 ame: Full= cardiac muscle isoform Flags: Precursor sarcoplasmic reticulum,myofibril,endoplasmic reticulum part,intracellular organelle lumen,calcium ion binding,regulation of striated muscle contraction,regulation of heart contraction,	11	4	24.4188	NaN	NaN	NaN	25.3552	25.9851	26.133	24.8792	23.4764	26.7447	27.6247	26.2189	24.6991	24.8318	NaN	NaN	NaN	NaN	NaN	NaN	26.5737	26.1967	26.6668	26.5859	21	21	56	62.622	0	160.16	5120800000	73
DERPT_G11836	---NA---	9	4	NaN	NaN	22.9588	23.908	26.4084	27.0452	24.0423	NaN	NaN	25.5606	24.0299	24.4305	NaN	NaN	25.6011	NaN	NaN	NaN	NaN	NaN	27.4366	27.1722	27.8386	26.2807	17	17	33.7	64.922	0	159.57	6037500000	74
DERPT_G9732	Full=Gamma-interferon-inducible lysosomal thiol reductase ame: Full=Gamma-interferon-inducible IP-30 Flags: Precursor lysosome,membrane,oxidoreductase activity, acting on a sulfur group of donors,antigen processing and presentation of exogenous peptide ant	4	4	NaN	NaN	NaN	NaN	NaN	NaN	NaN	NaN	25.3281	27.4718	27.1633	26.9022	NaN	NaN	NaN	NaN	NaN	NaN	NaN	NaN	25.0575	24.5806	26.1294	25.0946	8	8	63.4	17.124	0	159.57	2808100000	45
DERPT_G1689	Full=Non-canonical poly(A) RNA polymerase PAPD5 ame: Full=PAP-associated domain-containing 5 ame: Full=Terminal uridylyltransferase 3 Short=TUTase 3 ame: Full=Topoisomerase-related function 4-2 Short=TRF4-2 nucleolus,cytosol,TRAMP complex,cytoplasmic ribon	4	4	25.2945	NaN	26.0283	27.6144	26.2702	NaN	NaN	NaN	NaN	NaN	NaN	NaN	NaN	NaN	NaN	NaN	NaN	NaN	NaN	NaN	25.7391	25.9465	26.0493	25.7147	22	22	21.6	160.19	0	158.83	3389400000	74
DERPT_G6689	Full=Imidazolonepropionase ame: Full=Imidazolone-5-propionate hydrolase cytoplasm,hydrolase activity, acting on carbon-nitrogen (but not peptide) bonds, in cyclic amides,histidine catabolic process to glutamate and formamide	1	4	NaN	NaN	NaN	NaN	NaN	NaN	NaN	20.9651	NaN	NaN	NaN	NaN	NaN	NaN	NaN	NaN	NaN	NaN	NaN	NaN	25.0696	25.7109	23.0119	25.3607	10	10	34.9	48.899	0	157.92	1154900000	38
DERPT_G9390	Full=Inositol monophosphatase 1 Short=IMP 1 Short=IMPase 1 ame: Full=D-galactose 1-phosphate phosphatase ame: Full=Inositol-1(or 4)-monophosphatase 1 ame: Full=Lithium-sensitive myo-inositol monophosphatase A1 cytosol,plasma membrane,axon,neuronal cell bod	5	4	NaN	NaN	NaN	NaN	NaN	NaN	23.6495	25.6432	25.4941	NaN	NaN	26.3023	24.9094	NaN	NaN	NaN	NaN	NaN	NaN	NaN	25.3444	25.2564	25.3437	24.8839	15	15	33.3	60.464	0	157.59	2186100000	44
DERPT_G1710	Full=Elongation factor 1-gamma Short=EF-1-gamma ame: Full=eEF-1B gamma nucleus,lipid droplet,eukaryotic translation elongation factor 1 complex,microtubule associated complex,cell-cell junction,endomembrane system,membrane,cell periphery,translation elonga	18	4	23.7746	NaN	26.0575	25.426	26.154	25.3445	24.442	25.2061	24.2807	NaN	23.0335	24.6551	28.5898	29.6244	29.4684	27.9082	26.477	28.454	24.906	24.5465	28.4219	28.8803	27.9416	28.9964	20	20	52.4	46.351	0	157.54	11868000000	117
DERPT_G11020	Full=60S ribosomal L8 nuclear chromosome,nucleolus,vacuolar membrane,Golgi apparatus,plasma membrane,focal adhesion,chloroplast,cytosolic large ribosomal subunit,preribosome, large subunit precursor,mRNA binding,structural constituent of ribosome,protein b	0	4	NaN	NaN	NaN	NaN	NaN	NaN	NaN	NaN	NaN	NaN	NaN	NaN	NaN	NaN	NaN	NaN	NaN	NaN	NaN	NaN	25.2043	26.0419	24.4496	25.7824	11	11	42.4	28.226	0	156.58	1470900000	32
DERPT_G1521	Full=Pre-mRNA-splicing factor RSE1 nucleoplasm,U12-type spliceosomal complex,nucleolus,small nuclear ribonucleoprotein complex,catalytic step 2 spliceosome,RNA binding,protein binding,mRNA splicing, via spliceosome,protein-containing complex assembly,negat	3	4	NaN	NaN	NaN	22.3901	NaN	27.0803	23.7321	NaN	NaN	NaN	NaN	NaN	NaN	NaN	NaN	NaN	NaN	NaN	NaN	NaN	26.38	25.5976	25.4735	25.2583	25	25	34.5	136.13	0	156.4	2594100000	56
DERPT_G9923	Der p29 Allergen, Proposed Eur-Allergen, Allergen Homolog (Mal s6, Sola i5, Hev bCYP, Bet v7, Asp f27, Cand aCYP): Full=Peptidyl-prolyl cis-trans isomerase A Short=PPIase A ame: Full=Cyclophilin A ame: Full=Cyclosporin A-binding ame: Full=Rotamase A Contai	12	4	25.2511	NaN	23.205	NaN	NaN	NaN	NaN	20.9987	22.7664	26.2621	31.3433	30.828	30.4298	29.5608	28.6663	27.2153	28.0035	NaN	NaN	NaN	31.0351	31.2565	27.7611	31.2009	13	13	27.7	40.816	0	155.96	48291000000	122
DERPT_G4960	Full=Actin cytoskeleton-regulatory complex PAN1 cytoskeleton,clathrin-coated pit,cell junction,site of polarized growth,cytoplasmic vesicle,protein-containing complex,intracellular organelle part,cell projection part,bounding membrane of organelle,plasma m	9	3	NaN	NaN	NaN	NaN	NaN	NaN	26.0295	NaN	NaN	NaN	25.2939	27.172	27.4073	28.8158	28.7156	27.9759	26.9961	26.4317	NaN	NaN	27.5256	27.4565	NaN	25.3477	16	16	15.5	142.62	0	155.68	1881900000	54
DERPT_G8126	Full=Serpin B10 extracellular space,cytoplasm,membrane-bounded organelle,response to organic substance	3	4	NaN	NaN	NaN	NaN	NaN	NaN	NaN	25.5657	26.236	24.2596	NaN	NaN	NaN	NaN	NaN	NaN	NaN	NaN	NaN	NaN	27.0967	25.832	26.9212	26.1778	19	18	35.7	77.074	0	155.3	3682000000	59
DERPT_G3092	Full=Isocitrate dehydrogenase mitochondrial isocitrate dehydrogenase complex (NAD+),membrane,nuclear lumen,mitochondrial nucleoid,apoplast,magnesium ion binding,isocitrate dehydrogenase (NAD+) activity,ionotropic glutamate receptor activity,extracellularly	8	4	26.272	27.1358	29.0973	30.0663	28.4768	26.5616	24.8953	NaN	NaN	NaN	NaN	NaN	NaN	NaN	NaN	23.2464	NaN	NaN	NaN	NaN	26.8825	26.9482	27.0707	27.2478	18	18	25.7	84.32	0	154.13	12878000000	118
DERPT_G11635	Full=Ubiquitin carboxyl-terminal hydrolase 13 ame: Full=Deubiquitinating enzyme 13 ame: Full=Ubiquitin thioesterase 13 ame: Full=Ubiquitin-specific-processing protease 13 nucleus,endosome,cytosol,membrane,intracellular organelle part,thiol-dependent ubiqui	3	4	NaN	NaN	NaN	NaN	NaN	25.598	26.1124	25.4378	NaN	NaN	NaN	NaN	NaN	NaN	NaN	NaN	NaN	NaN	NaN	NaN	25.3715	26.0745	25.0762	25.7657	18	18	25.7	100.56	0	153.73	2242000000	48
DERPT_G281	Full=Polyadenylate-binding cytoplasmic and nuclear Short=PABP Short=Poly(A)-binding ame: Full=Polyadenylate tail-binding lipid droplet,cytosol,microtubule associated complex,cytoplasmic ribonucleoprotein granule,precatalytic spliceosome,catalytic step 2 sp	4	3	NaN	NaN	NaN	NaN	NaN	NaN	NaN	NaN	NaN	NaN	25.9576	27.8806	23.8896	NaN	27.2759	NaN	NaN	NaN	NaN	NaN	23.6517	25.3416	NaN	25.3603	7	7	14.2	75.002	0	153.51	1698500000	26
DERPT_G9385	Full=Peptidase 1 ame: Full=Allergen Der f I ame: Full=Major mite fecal allergen Der f 1 ame: Allergen=Der f 1 Flags: Precursor cytoplasmic part,cysteine-type peptidase activity,proteolysis	12	4	NaN	NaN	23.4604	NaN	NaN	NaN	NaN	24.8172	28.2458	28.5174	26.3019	26.3413	NaN	24.5792	24.1381	25.8699	26.3102	24.9104	NaN	27.4864	29.0918	28.7029	29.243	29.3193	16	16	50.6	39.225	0	152.47	18386000000	90
DERPT_G9323	Full=Dehydrogenase reductase SDR family member 4 ame: Full=NADPH-dependent carbonyl reductase NADP-retinol dehydrogenase Short=CR Short=PHCR ame: Full=NADPH-dependent retinol dehydrogenase reductase Short=NDRD ame: Full=Peroxisomal short-chain alcohol dehy	16	4	NaN	NaN	NaN	NaN	25.4742	25.3294	26.8941	27.3931	25.8944	25.2632	24.6284	26.4076	27.194	27.3622	28.4372	29.1135	29.8619	30.1414	30.0999	29.5736	27.9938	28.5245	27.0166	27.6872	22	22	55.5	47.595	0	152.19	8081100000	142
DERPT_G9095	Full= oxidoreductase GLYR1 ame: Full=Glyoxylate reductase 1 homolog ame: Full=Nuclear NP60 cytosol,chloroplast,intracellular organelle part,3-hydroxybutyrate dehydrogenase activity,phosphogluconate dehydrogenase (decarboxylating) activity,NAD binding,respo	2	4	NaN	NaN	NaN	NaN	NaN	NaN	NaN	NaN	NaN	NaN	NaN	25.534	NaN	24.775	NaN	NaN	NaN	NaN	NaN	NaN	26.2735	26.3531	27.0811	25.7088	16	16	42	58.814	0	152.13	3032200000	62
DERPT_G11344	Full=Coatomer subunit beta ame: Full=Beta -coat Short=Beta -COP ame: Full=p102 Golgi membrane,extracellular space,nucleus,endoplasmic reticulum membrane,cytosol,plasma membrane,focal adhesion,lamellipodium,COPI vesicle coat,transport vesicle,extracellular	2	4	NaN	NaN	NaN	NaN	NaN	NaN	NaN	NaN	NaN	NaN	NaN	23.3155	24.59	NaN	NaN	NaN	NaN	NaN	NaN	NaN	25.0459	26.4643	24.3403	25.7855	27	27	20.5	211.09	0	151.59	1657100000	51
DERPT_G9605	Full=Ubiquitin carboxyl-terminal hydrolase 47 ame: Full=Deubiquitinating enzyme 47 ame: Full=Ubiquitin thioesterase 47 ame: Full=Ubiquitin-specific-processing protease 47 XY body,polytene chromosome,cytosol,nuclear body,SCF ubiquitin ligase complex,transcr	4	4	NaN	NaN	NaN	NaN	23.1186	NaN	25.0851	24.9974	23.5106	NaN	NaN	NaN	NaN	NaN	NaN	NaN	NaN	NaN	NaN	NaN	25.832	26.4097	22.8141	26.2122	29	29	41.7	124.04	0	151.37	2292400000	70
DERPT_G6020	Full=Maleylacetoacetate isomerase Short=MAAI mitochondrion,cytosol,glutathione transferase activity,glutathione peroxidase activity,maleylacetoacetate isomerase activity,protein homodimerization activity,L-phenylalanine catabolic process,tyrosine catabolic	5	4	NaN	NaN	NaN	NaN	NaN	NaN	NaN	22.7369	28.3522	24.6694	21.929	NaN	23.7248	NaN	NaN	NaN	NaN	NaN	NaN	NaN	27.0525	26.0294	26.3057	26.3597	17	17	78.3	25.62	0	150.4	4109200000	71
DERPT_G1399	Full=Acetyl- mitochondrial Short=ACC Includes: ame: Full=Biotin carboxylase Flags: Precursor nucleolus,mitochondrion,endoplasmic reticulum membrane,cytosol,plasma membrane,actin cytoskeleton,extracellular exosome,acetyl-CoA carboxylase activity,biotin carb	3	4	NaN	NaN	NaN	NaN	27.2861	25.8735	23.0919	NaN	NaN	NaN	NaN	NaN	NaN	NaN	NaN	NaN	NaN	NaN	NaN	NaN	25.0882	24.3204	24.5584	25.1238	21	21	37.2	85.007	0	150.07	1884500000	59
DERPT_G9232	Full=Calpain-1 catalytic subunit ame: Full=Calcium-activated neutral ase 1 Short=CANP 1 ame: Full=Calpain mu-type ame: Full=Calpain-1 large subunit ame: Full=Micromolar-calpain Short=muCANP chromatin,nucleus,mitochondrion,lysosome,endoplasmic reticulum,cyt	0	3	NaN	NaN	NaN	NaN	NaN	NaN	NaN	NaN	NaN	NaN	NaN	NaN	NaN	NaN	NaN	NaN	NaN	NaN	NaN	NaN	24.1412	25.6455	NaN	24.542	15	15	26.7	114.29	0	150.06	765310000	22
DERPT_G5470	Full=Demethylmenaquinone methyltransferase cytosol,phosphoethanolamine N-methyltransferase activity,phosphomethylethanolamine N-methyltransferase activity,phosphatidylcholine biosynthetic process,pollen development,pollen tube growth,pollen tube guidance,m	8	4	NaN	NaN	NaN	22.2985	NaN	NaN	NaN	24.117	27.7582	28.0087	26.1633	23.7872	24.3207	24.5132	NaN	NaN	NaN	NaN	NaN	NaN	26.6827	26.4474	24.4276	27.7766	22	22	80	31.858	0	149.87	5398600000	90
DERPT_G108	Full=Serpin B10 extracellular space,cytoplasmic vesicle,serine protease inhibitor complex,endopeptidase inhibitor activity,binding,regulation of cellular process,regulation of protein metabolic process	2	4	NaN	NaN	NaN	NaN	NaN	NaN	NaN	NaN	NaN	24.3975	25.5895	NaN	NaN	NaN	NaN	NaN	NaN	NaN	NaN	NaN	29.328	27.3487	28.3876	29.1397	19	19	46	42.54	0	149.42	12969000000	71
DERPT_G5744	Full=Glycogen debranching enzyme ame: Full=Glycogen debrancher Includes: ame: Full=4-alpha-glucanotransferase ame: Full=Oligo-1,4-1,4-glucantransferase Includes: ame: Full=Amylo-alpha-1,6-glucosidase Short=Amylo-1,6-glucosidase ame: Full=Dextrin 6-alpha-D-	0	4	NaN	NaN	NaN	NaN	NaN	NaN	NaN	NaN	NaN	NaN	NaN	NaN	NaN	NaN	NaN	NaN	NaN	NaN	NaN	NaN	24.7794	25.5345	24.0103	24.7583	20	20	19.6	180.41	0	148.72	951960000	30
DERPT_G2431	---NA---	7	4	29.1646	25.9925	25.2411	23.8456	NaN	NaN	NaN	22.3803	25.0471	NaN	NaN	NaN	NaN	22.6101	NaN	NaN	NaN	NaN	NaN	NaN	24.5851	24.5846	25.0755	24.1526	22	22	10.6	256.72	0	148.04	2030600000	56
DERPT_G11486	Full=Acid phosphatase type 7 ame: Full=Purple acid phosphatase long form Flags: Precursor cell part,acid phosphatase activity,metal ion binding,riboflavin metabolic process,hexachlorocyclohexane metabolic process	4	4	NaN	NaN	NaN	NaN	NaN	25.7095	28.5661	27.2983	24.8833	NaN	NaN	NaN	NaN	NaN	NaN	NaN	NaN	NaN	NaN	NaN	26.4234	26.0691	25.7799	27.1869	12	12	13.6	120.76	0	147.57	5875900000	64
DERPT_G5841	Full=Inositol monophosphatase 1 Short=IMP 1 Short=IMPase 1 ame: Full=D-galactose 1-phosphate phosphatase ame: Full=Inositol-1(or 4)-monophosphatase 1 ame: Full=Lithium-sensitive myo-inositol monophosphatase A1 nucleus,cytosol,plasma membrane,axon,neuronal	14	4	26.6655	25.0055	26.3989	26.9883	26.8125	27.5746	28.7654	29.6786	29.4076	26.5725	NaN	NaN	24.7615	NaN	NaN	23.6612	23.9916	23.1626	NaN	NaN	28.7045	28.4312	29.2176	28.6482	22	22	53.6	30.974	0	147.39	25556000000	168
DERPT_G1634	Full=Cystatin Flags: Precursor cysteine-type endopeptidase inhibitor activity,binding,hydrolase activity,regulation of biological quality	16	4	NaN	NaN	23.9739	NaN	NaN	24.2145	23.6599	26.2828	29.6389	30.4859	28.516	27.2073	28.3299	27.7781	27.9221	28.0527	28.3656	28.2996	28.9547	27.905	25.7422	25.6108	26.6082	25.269	18	18	13.6	119.71	0	146.75	12420000000	87
DERPT_G324	Full=Kynureninase ame: Full=L-kynurenine hydrolase mitochondrion,pyridoxal phosphate binding,kynureninase activity,tryptophan catabolic process,NAD biosynthetic process,benzene-containing compound metabolic process	3	4	NaN	NaN	NaN	NaN	NaN	25.7213	26.18	23.2669	NaN	NaN	NaN	NaN	NaN	NaN	NaN	NaN	NaN	NaN	NaN	NaN	24.2782	24.7135	23.8967	24.3786	14	14	33.1	63.948	0	146.5	1365800000	40
DERPT_G7483	Full=Guanine nucleotide-binding G(I) G(S) G(T) subunit beta-1 ame: Full=Transducin beta chain 1 photoreceptor inner segment,extracellular space,lysosomal membrane,heterotrimeric G-protein complex,microtubule associated complex,focal adhesion,dendrite,photo	10	4	25.6896	NaN	NaN	NaN	24.0195	NaN	24.375	24.5419	25.3934	25.6591	25.23	24.7042	25.3946	25.426	NaN	NaN	NaN	NaN	NaN	NaN	25.2375	25.9629	24.1084	25.6026	15	15	58.5	37.328	0	146.23	2830700000	56
DERPT_G3101	Full=Carbonic anhydrase 1 ame: Full=Carbonate dehydratase I ame: Full=Carbonic anhydrase I Short=CA-I mitochondrion,cytosol,carbonate dehydratase activity,positive regulation of defense response to virus by host,positive regulation of synaptic transmission	11	4	22.2257	NaN	22.5301	NaN	NaN	20.9291	22.7202	23.7211	25.6764	28.7447	26.5323	24.7821	NaN	NaN	26.2299	24.0459	NaN	NaN	NaN	NaN	28.2443	28.3938	26.732	28.2417	10	10	57.5	31.065	0	145.26	10596000000	77
DERPT_G11608	Full=Cytosolic 10-formyltetrahydrofolate dehydrogenase Short=10-FTHFDH Short=FDH ame: Full=Aldehyde dehydrogenase family 1 member L1 mitochondrion,protein-containing complex,extracellular exosome,retinal dehydrogenase activity,3-chloroallyl aldehyde dehydr	3	4	NaN	NaN	24.9675	24.5237	NaN	NaN	NaN	22.5057	NaN	NaN	NaN	NaN	NaN	NaN	NaN	NaN	NaN	NaN	NaN	NaN	23.6762	24.5949	22.2558	25.7861	23	23	40.9	102.28	0	143.54	1144100000	48
DERPT_G9513	---NA---	7	4	NaN	NaN	NaN	NaN	NaN	NaN	NaN	NaN	NaN	27.1944	28.9764	27.8171	25.4907	23.8437	25.0307	NaN	NaN	25.0311	NaN	NaN	25.2182	24.1744	26.8099	25.6487	16	16	75.6	19.039	0	142.2	4293600000	59
DERPT_G1685	Full=Phytanoyl- dioxygenase domain-containing 1 dioxygenase activity,metabolic process	1	4	NaN	NaN	NaN	NaN	NaN	NaN	NaN	NaN	NaN	NaN	NaN	24.2646	NaN	NaN	NaN	NaN	NaN	NaN	NaN	NaN	22.3746	23.4481	21.5925	22.9032	7	7	23.4	57.378	0	142.04	439950000	17
DERPT_G1164	Allergen homolog (Pen c24, Ech gr EF-1): Full=Elongation factor 1-beta Short=EF-1-beta nucleolus,endoplasmic reticulum,lipid droplet,cytosol,eukaryotic translation elongation factor 1 complex,cell-cell adherens junction,DNA binding,translation elongation f	20	4	23.1889	24.7421	26.0345	27.0321	27.0558	27.1671	26.6355	26.9605	26.5541	28.7783	30.7164	29.416	26.7908	26.6084	27.1793	28.015	28.2232	27.2288	26.7867	25.6877	26.5567	25.7305	25.6948	25.6908	19	19	68.4	25.116	0	140.95	16061000000	115
DERPT_G3391	Full=Spermidine synthase Short=SPDSY ame: Full=Putrescine aminopropyltransferase nucleus,cytosol,plasma membrane,spermidine synthase activity,spermine synthase activity,protein homodimerization activity,spermine biosynthetic process,spermidine biosynthetic	9	4	22.4783	NaN	23.7364	24.5479	24.9533	25.883	27.4971	28.252	27.9042	25.1693	NaN	NaN	NaN	NaN	NaN	NaN	NaN	NaN	NaN	NaN	26.497	25.5687	27.1073	26.049	14	14	60.8	34.678	0	140.27	7145300000	65
DERPT_G8629	Full=3-oxoacyl- mitochondrion,plasma membrane,microvillus,brush border,vesicle,intracellular organelle part,carbonyl reductase (NADPH) activity,protein self-association,L-xylulose reductase (NADP+) activity,xylulose catabolic process,glucose metabolic proc	10	4	25.9177	NaN	NaN	23.6271	24.1738	25.447	26.5518	26.525	25.5008	25.455	22.9095	23.8772	NaN	NaN	NaN	NaN	NaN	NaN	NaN	NaN	27.8009	27.4664	26.3629	27.5035	17	17	82.1	27.022	0	139.47	7135900000	81
DERPT_G6139	Full=4-hydroxyphenylpyruvate dioxygenase ame: Full=4-hydroxyphenylpyruvic acid oxidase Short=4HPPD Short=HPD Short=HPPDase endoplasmic reticulum,Golgi apparatus,membrane,intracellular organelle part,4-hydroxyphenylpyruvate dioxygenase activity,tyrosine cat	5	4	NaN	NaN	NaN	NaN	NaN	NaN	26.1854	29.0988	26.7261	NaN	NaN	NaN	NaN	NaN	26.1998	NaN	27.4155	NaN	NaN	NaN	27.281	27.1364	26.6424	27.923	20	20	72.7	43.138	0	139.31	14716000000	63
DERPT_G10790	Full=Acid sphingomyelinase-like phosphodiesterase 3a Short=ASM-like phosphodiesterase 3a Flags: Precursor lytic vacuole,vacuolar membrane,extracellular region part,membrane part,sphingomyelin phosphodiesterase activity,metal ion binding,sphingomyelin catab	3	4	NaN	NaN	NaN	NaN	NaN	NaN	25.898	26.5225	24.5731	NaN	NaN	NaN	NaN	NaN	NaN	NaN	NaN	NaN	NaN	NaN	23.5291	25.0231	24.5479	24.9331	13	13	32.5	73.425	0	139.16	1693600000	36
DERPT_G7879	Full=Pyruvate dehydrogenase E1 component subunit mitochondrial Short=PDHE1-B Flags: Precursor nucleoplasm,nucleolus,vacuolar membrane,Golgi apparatus,cytosol,mitochondrial pyruvate dehydrogenase complex,mitochondrial nucleoid,apoplast,extracellular exosome	4	4	NaN	NaN	NaN	NaN	NaN	27.0445	24.6652	NaN	NaN	NaN	NaN	NaN	25.6409	25.11	NaN	NaN	NaN	NaN	NaN	NaN	25.9972	27.0572	24.4815	26.5929	11	11	52	40.979	0	139.01	2909500000	47
DERPT_G7259	Der p21 Allergen;Allergen Homolog (Der f21, Lepd5) Full=Mite allergen Lep d 5 ame: Allergen=Lep d 5	18	4	21.9784	NaN	23.6532	22.694	22.6805	22.6639	23.8302	28.618	31.5284	29.3626	28.8159	28.0908	27.381	26.698	25.6997	27.3667	26.1984	25.7397	25.2745	NaN	27.0786	26.3426	27.8601	26.6099	19	19	70.7	16.531	0	138.58	22704000000	117
DERPT_G684	---NA---	2	4	NaN	NaN	NaN	NaN	NaN	NaN	NaN	NaN	NaN	NaN	28.0243	28.1035	NaN	NaN	NaN	NaN	NaN	NaN	NaN	NaN	24.5347	22.4934	24.6943	26.206	7	7	59.1	14.367	0	138.51	2275900000	23
DERPT_G5528	Full=UPF0462 clathrin coat of coated pit,cytoplasmic vesicle,intracellular organelle part,cell projection part,bounding membrane of organelle,plasma membrane region,calcium ion binding,protein binding,vesicle-mediated transport,cellular pro	2	4	NaN	NaN	NaN	NaN	NaN	NaN	NaN	NaN	NaN	NaN	NaN	25.2296	24.9322	NaN	NaN	NaN	NaN	NaN	NaN	NaN	24.9552	25.1815	24.9072	24.7332	13	13	20.8	106.71	0	138.24	1398400000	36
DERPT_G9202	---NA---	6	4	NaN	NaN	23.3729	NaN	NaN	23.9678	NaN	24.4804	25.7008	25.4408	24.3218	NaN	NaN	NaN	NaN	NaN	NaN	NaN	NaN	NaN	24.9715	24.3988	25.0217	24.4529	8	8	56.8	15.651	0	138.19	1534300000	23
DERPT_G10519	Der f26 like allergen, Proposed StenAllergen, Allergen homolog (der f30, Cra c 5, Art fr 5)Full=Mitochondrial RNA pseudouridine synthase Rpusd4 ame: Full=RNA pseudouridylate synthase domain-containing 4 Flags: Precursor mitochondrion,cytosol,striated muscl	20	4	29.4731	28.161	25.9114	24.4495	23.9862	23.8776	25.1562	25.3178	26.7074	28.7181	29.0683	30.8474	32.8529	31.9372	30.2491	28.151	26.3228	25.937	25.8935	24.4586	29.3967	29.0533	29.0071	28.5245	14	14	10.8	133.73	0	138.1	31297000000	134
DERPT_G1383	Full=N(4)-(beta-N-acetylglucosaminyl)-L-asparaginase ame: Full=Aspartylglucosaminidase Short=AGA ame: Full=Glycosylasparaginase ame: Full=N4-(N-acetyl-beta-glucosaminyl)-L-asparagine amidase Contains: ame: Full=Glycosylasparaginase alpha chain Contains: am	4	4	NaN	NaN	NaN	NaN	NaN	25.0082	26.435	27.2487	26.9911	NaN	NaN	NaN	NaN	NaN	NaN	NaN	NaN	NaN	NaN	NaN	25.1402	24.8134	25.9738	24.9409	7	7	36.5	37.285	0	137.99	3341700000	35
DERPT_G8359	Full=Stress-induced-phospho 1 Short=STI1 ame: Full=Hsc70 Hsp90-organizing Short=Hop nucleus,Golgi apparatus,cytosol,plasma membrane,myelin sheath,protein-containing complex,mRNA binding,protein C-terminus binding,Hsp70 protein binding,ATPase inhibitor acti	11	4	23.9525	NaN	NaN	NaN	24.5534	22.4059	23.7324	25.0327	27.5213	27.2682	26.8674	26.7802	26.8113	25.6572	NaN	NaN	NaN	NaN	NaN	NaN	24.7583	24.5146	24.7238	25.0835	16	16	49.8	37.398	0	137.78	3126600000	62
DERPT_G5967	Full=Rho GDP-dissociation inhibitor 1 Short=Rho GDI 1 ame: Full=Rho-GDI alpha immunological synapse,extracellular space,nucleus,cytosol,cellular bud tip,cellular bud neck,extracellular exosome,Rho GDP-dissociation inhibitor activity,fatty acid binding,prot	5	4	NaN	NaN	NaN	NaN	NaN	NaN	NaN	NaN	23.7163	27.2975	27.2234	27.3641	NaN	NaN	NaN	NaN	NaN	25.1203	NaN	NaN	27.7801	27.7483	26.8721	27.7318	13	13	57.1	23.375	0	137.51	7588800000	70
DERPT_G285	Full=D-2-hydroxyglutarate mitochondrial Flags: Precursor mitochondrial inner membrane,D-lactate dehydrogenase (cytochrome) activity,ATP binding,D-lactate dehydrogenase activity,glycolate oxidase activity,glycolate dehydrogenase activity,identical protein b	0	4	NaN	NaN	NaN	NaN	NaN	NaN	NaN	NaN	NaN	NaN	NaN	NaN	NaN	NaN	NaN	NaN	NaN	NaN	NaN	NaN	25.3422	25.1121	25.8605	25.1384	17	17	55.1	56.499	0	137.07	1216500000	43
DERPT_G3070	Full=UBX domain-containing 1 ame: Full=SAPK substrate 1 endoplasmic reticulum,membrane,intracellular organelle part,polyubiquitin modification-dependent protein binding,response to stress,response to organic substance,proteasome-mediated ubiquitin-dependen	5	4	NaN	NaN	NaN	NaN	NaN	NaN	NaN	NaN	NaN	NaN	25.1534	29.1968	28.6762	27.0031	27.3959	NaN	NaN	NaN	NaN	NaN	25.0057	23.9296	25.468	24.0169	6	6	34.2	30.705	0	136.95	3053700000	28
DERPT_G1703	Full= farnesyltransferase subunit beta Short=FTase-beta ame: Full=CAAX farnesyltransferase subunit beta ame: Full=Ras s prenyltransferase subunit beta cytosol,microtubule associated complex,protein farnesyltransferase complex,farnesyltranstransferase activ	0	4	NaN	NaN	NaN	NaN	NaN	NaN	NaN	NaN	NaN	NaN	NaN	NaN	NaN	NaN	NaN	NaN	NaN	NaN	NaN	NaN	24.4955	25.9012	23.1303	24.8407	7	7	42.9	45.812	0	136.9	965310000	22
DERPT_G8187	Full=Calnexin homolog Flags: Precursor nuclear envelope,mitochondrion,vacuolar membrane,endoplasmic reticulum membrane,smooth endoplasmic reticulum,plasma membrane,plant-type cell wall,plasmodesma,chloroplast,integral component of membrane,somatodendritic	11	4	NaN	NaN	NaN	23.8522	NaN	25.1169	27.0025	26.4288	27.0031	25.2427	25.4027	24.4519	27.3257	26.8777	26.9316	NaN	NaN	NaN	NaN	NaN	25.6596	27.0192	24.5753	26.2251	22	22	39.1	72.375	0	136.8	4591300000	79
DERPT_G1514	Full=Alpha-adducin ame: Full=Erythrocyte adducin subunit alpha condensed nuclear chromosome,lipid droplet,actin filament,brush border,cell-cell junction,cell cortex,postsynaptic density,lateral plasma membrane,female germline ring canal inner rim,fusome,sp	7	0	24.9297	NaN	NaN	NaN	NaN	NaN	23.3703	NaN	NaN	NaN	25.5102	25.4182	27.0895	27.5696	26.5411	NaN	NaN	NaN	NaN	NaN	NaN	NaN	NaN	NaN	17	17	30.4	80.223	0	136.25	1961500000	57
DERPT_G7979	Full=Sodium hydrogen exchanger 3 ame: Full=Na(+) H(+) exchanger 3 Short=NHE-3 ame: Full=Solute carrier family 9 member 3 nucleoplasm,mitochondrion,endoplasmic reticulum,integral component of plasma membrane,focal adhesion,cell surface,intercalated disc,bas	7	4	NaN	NaN	NaN	NaN	NaN	NaN	NaN	NaN	25.0607	25.3585	28.6085	28.2124	25.177	23.4692	NaN	NaN	26.3995	NaN	NaN	NaN	25.9729	25.4572	26.3304	25.636	11	11	10.4	176.65	0	135.71	4267100000	49
DERPT_G5267	Der f22 like Allergen;Allergen homolog (Hom sp2, Alt a6, Asp f8, Cla h3, Fus c1) Full=Mite group 2 allergen Gly d ame: Allergen=Gly d extracellular region,lipid binding,carbohydrate derivative binding,steroid metabolic process,cellular process,cholesterol	12	4	NaN	NaN	NaN	NaN	23.7475	NaN	23.0966	NaN	24.437	26.6193	30.8557	30.338	27.6935	26.2132	25.7354	NaN	NaN	25.1907	27.1139	25.7017	28.281	28.3123	29.5384	27.9995	8	8	65	15.649	0	135.32	20897000000	62
DERPT_G8157	Full=Acetylcholinesterase Short=A Flags: Precursor endoplasmic reticulum,plasma membrane,extracellular region part,intracellular organelle part,synapse,neuron part,cholinesterase activity,protein binding,neurotransmitter metabolic process,response to chemi	3	4	NaN	NaN	NaN	NaN	NaN	NaN	25.3394	27.1373	26.4491	NaN	NaN	NaN	NaN	NaN	NaN	NaN	NaN	NaN	NaN	NaN	26.5648	26.4726	26.8968	26.2739	16	14	43.5	62.139	0	135.29	4474100000	65
DERPT_G1076	Full=T-complex 1 subunit zeta Short=TCP-1-zeta ame: Full=CCT-zeta acrosomal vesicle,zona pellucida receptor complex,chaperonin-containing T-complex,microtubule,membrane,extracellular matrix,cell body,extracellular exosome,ATP binding,protein binding involv	16	4	26.2185	28.5989	28.0037	24.5294	22.7584	NaN	22.9341	22.4109	21.8377	22.8743	22.63	22.9496	25.151	25.5399	24.7884	22.6232	23.0378	NaN	NaN	NaN	24.5492	26.7571	23.241	26.1719	26	26	60	59.396	0	135.15	3541600000	105
DERPT_G11103	354787XP_003718913.1 hypothetical protein MGG_00202 [Magnaporthe oryzae 70-15] EHA49329.1 hypothetical protein MGG_00202 [Magnaporthe oryzae 70-15] ELQ34134.1 hypothetical protein OOU_Y34scaffold00793g16 [Magnaporthe oryzae Y34] ELQ68865.1 hypothetical pro	5	4	NaN	NaN	NaN	NaN	NaN	NaN	NaN	24.0601	26.1236	26.0021	23.8312	NaN	NaN	NaN	NaN	NaN	NaN	24.7597	NaN	NaN	23.9608	23.6532	24.6853	23.4276	7	7	24.1	36.884	0	135.09	1235100000	21
DERPT_G7243	Full=Ubiquitin-fold modifier 1 Flags: Precursor nucleus,endoplasmic reticulum,extracellular exosome,locomotion involved in locomotory behavior,regulation of intracellular estrogen receptor signaling pathway,response to endoplasmic reticulum stress,negative	3	4	NaN	NaN	NaN	NaN	NaN	NaN	NaN	NaN	NaN	NaN	26.9986	28.1367	27.3911	NaN	NaN	NaN	NaN	NaN	NaN	NaN	26.5635	25.7899	26.6338	26.5731	6	6	56.2	13.007	0	133.84	3185500000	24
DERPT_G4242	Full=3-ketoacyl- thiolase ame: Full=ACSs ame: Full=Acetyl- acyltransferase ame: Full=Acyl- ligase ame: Full=Beta-ketothiolase ame: Full=Fatty acid oxidation complex subunit beta mitochondrial outer membrane,mitochondrial inner membrane,endoplasmic reticulu	2	4	NaN	NaN	NaN	NaN	NaN	NaN	NaN	NaN	NaN	NaN	NaN	NaN	26.4564	26.0135	NaN	NaN	NaN	NaN	NaN	NaN	25.4399	26.3581	24.3509	25.8967	15	15	45.3	51.075	0	133.52	2105800000	47
DERPT_G5131	Full=Pyridoxal kinase Short=PL kinase nucleus,cytosol,nucleotide binding,pyridoxal kinase activity,alkali metal ion binding,anion binding,cellular bud site selection,pyridoxine biosynthetic process,pyridoxal 5-phosphate salvage,trichoblast differentiation	4	4	24.2673	NaN	NaN	NaN	NaN	NaN	23.55	25.7195	23.5525	NaN	NaN	NaN	NaN	NaN	NaN	NaN	NaN	NaN	NaN	NaN	26.2128	26.0196	27.0823	26.6686	16	16	73.9	34.781	0	133.43	3334400000	65
DERPT_G1570	Full=Dihydrolipoyllysine-residue acetyltransferase component of pyruvate dehydrogenase complex ame: Full=Dihydrolipoamide acetyltransferase component of pyruvate dehydrogenase complex ame: Full=E2 mitochondrial pyruvate dehydrogenase complex,chloroplast en	8	4	24.6836	26.2101	26.7099	24.0693	NaN	NaN	22.4239	NaN	NaN	26.1851	26.2075	25.6502	NaN	NaN	NaN	NaN	NaN	NaN	NaN	NaN	24.9866	24.9236	24.7886	24.7888	15	15	30.7	56.128	0	133.41	2235100000	54
DERPT_G8411	Full=ATPase mitochondrial ame: Full=Inhibitor of F(1)F(o)-ATPase Short=IF(1) Short=IF1 Flags: Precursor mitochondrion,calmodulin binding,5-formyltetrahydrofolate cyclo-ligase activity,ATPase inhibitor activity,protein homodimerization activity,ATPase bindi	20	2	19.4295	19.0722	25.681	30.3198	29.8328	26.397	24.1229	22.9226	24.9325	28.7132	30.473	25.873	23.4841	22.7252	23.1895	24.0164	23.68	20.6975	22.7164	19.8226	NaN	NaN	22.6367	19.9593	10	10	80.5	9.2651	0	133.15	16134000000	104
DERPT_G3713	Full=Propionyl- carboxylase beta mitochondrial Short=PCCase subunit beta ame: Full=Propanoyl- :carbon dioxide ligase subunit beta Flags: Precursor cell wall,mitochondrial matrix,plasma membrane,acetyl-CoA carboxylase complex,protein-containing complex,acet	0	4	NaN	NaN	NaN	NaN	NaN	NaN	NaN	NaN	NaN	NaN	NaN	NaN	NaN	NaN	NaN	NaN	NaN	NaN	NaN	NaN	24.3711	26.6276	22.3759	26.0826	17	17	53.9	60.503	0	133.04	1560500000	39
DERPT_G5721	Full=Coatomer subunit gamma-2 ame: Full=Gamma-2-coat Short=Gamma-2-COP Golgi membrane,endoplasmic reticulum membrane,cis-Golgi network,cytosol,plasma membrane,plasmodesma,chloroplast,COPI vesicle coat,transport vesicle,structural molecule activity,binding,	0	4	NaN	NaN	NaN	NaN	NaN	NaN	NaN	NaN	NaN	NaN	NaN	NaN	NaN	NaN	NaN	NaN	NaN	NaN	NaN	NaN	25.6061	25.6042	25.7126	25.7557	16	16	31.7	102.05	0	131.2	1584600000	58
DERPT_G7587	Full= -L-isoaspartate(D-aspartate) O-methyltransferase Short=PIMT ame: Full=L-isoaspartyl carboxyl methyltransferase ame: Full= L-isoaspartyl D-aspartyl methyltransferase ame: Full= -beta-aspartate methyltransferase extracellular space,nucleus,cytosol,baso	6	4	NaN	NaN	NaN	NaN	NaN	NaN	NaN	NaN	25.0558	28.2154	28.1475	26.6615	25.6972	25.4035	NaN	NaN	NaN	NaN	NaN	NaN	25.99	26.5688	25.1543	26.5519	13	13	56.7	29.689	0	130.48	4543700000	52
DERPT_G2912	Allergen homolog (Tri a34, Asp vGAPDH): Full=DNA-directed RNA polymerase II subunit rpb2 Short=RNA polymerase II subunit 2 Short=RNA polymerase II subunit B2 RNA polymerase II, core complex,mitochondrion,cytosol,plasmodesma,cytoplasmic stress granule,nucle	6	4	NaN	NaN	22.8924	22.9141	24.4528	27.4477	28.0084	23.7783	NaN	NaN	NaN	NaN	NaN	NaN	NaN	NaN	NaN	NaN	NaN	NaN	27.2381	27.4346	25.9385	26.7429	19	18	5.1	529.84	0	130.4	5974400000	77
DERPT_G11433	Full=Mucin-19 Short=MUC-19 Flags: Precursor extracellular region,chitin binding,chitin metabolic process	9	4	NaN	NaN	NaN	NaN	NaN	NaN	NaN	NaN	23.9283	26.2812	27.4754	26.9802	25.9144	25.3131	26.0374	26.6291	25.6531	NaN	NaN	NaN	25.8692	24.799	25.7556	24.0609	9	9	22.6	71.533	0	130.21	2444600000	43
DERPT_G129	Full=Adenylyl cyclase-associated 1 Short=CAP 1 extracellular space,postsynaptic density,cortical actin cytoskeleton,membrane-bounded organelle,nucleic acid binding,actin binding,zinc ion binding,cell morphogenesis,ameboidal-type cell migration,receptor-med	7	0	NaN	NaN	NaN	NaN	21.8996	25.7614	27.0884	25.1142	21.9465	23.2917	23.7759	NaN	NaN	NaN	NaN	NaN	NaN	NaN	NaN	NaN	NaN	NaN	NaN	NaN	14	14	34.1	63.2	0	127.75	2585100000	45
DERPT_G5768	Full=Mitochondrial-processing peptidase subunit alpha ame: Full=Alpha-MPP Flags: Precursor extracellular space,nucleus,mitochondrial inner membrane,mitochondrial processing peptidase complex,extracellular exosome,bounding membrane of organelle,whole membra	5	4	NaN	NaN	NaN	NaN	NaN	NaN	23.2763	24.0589	23.1214	NaN	NaN	NaN	23.5974	25.6273	NaN	NaN	NaN	NaN	NaN	NaN	24.9402	26.9312	22.341	26.2239	18	18	31.7	83.379	0	127.74	2060700000	59
DERPT_G1600	Allergen homolog (Der p8): Full=Glutathione S-transferase 1-1 ame: Full=DDT-dehydrochlorinase ame: Full=GST class-theta glutathione transferase activity,protein binding,DDT-dehydrochlorinase activity,glutathione metabolic process,obsolete glutathione conju	4	4	NaN	NaN	NaN	NaN	NaN	NaN	24.3496	27.7936	27.6251	NaN	NaN	23.6563	NaN	NaN	NaN	NaN	NaN	NaN	NaN	NaN	27.1155	25.6216	26.6178	25.572	12	12	67.1	26.769	0	127.54	4407100000	38
DERPT_G5772	Full=Oxygen-dependent coproporphyrinogen-III oxidase Short=CPO Short=Coprogen oxidase Short=Coproporphyrinogenase mitochondrial inner membrane,mitochondrial intermembrane space,cytosol,chloroplast stroma,apoplast,coproporphyrinogen oxidase activity,structu	3	4	NaN	NaN	NaN	NaN	NaN	NaN	27.1944	25.6156	22.4449	NaN	NaN	NaN	NaN	NaN	NaN	NaN	NaN	NaN	NaN	NaN	26.2907	25.5148	26.8154	25.9438	21	21	58.7	43.962	0	127.48	3409900000	69
DERPT_G11710	Full=Acetyl- mitochondrial ame: Full=Acetoacetyl- thiolase Flags: Precursor nucleus,mitochondrial inner membrane,mitochondrial matrix,peroxisome,cytosol,plasma membrane,extracellular exosome,acetyl-CoA C-acetyltransferase activity,carbon-carbon lyase activ	4	4	NaN	NaN	NaN	NaN	NaN	NaN	NaN	NaN	NaN	NaN	25.7022	26.3746	26.8905	25.1529	NaN	NaN	NaN	NaN	NaN	NaN	23.2737	24.5546	22.6373	24.5792	12	12	43.8	41.375	0	126.95	1243200000	36
DERPT_G1678	Full=Peptidase E ame: Full=Alpha-aspartyl dipeptidase ame: Full=Asp-specific dipeptidase ame: Full=Dipeptidase E serine-type peptidase activity,proteolysis	10	4	NaN	NaN	24.9482	25.1725	24.885	26.3307	26.9989	27.6832	26.6628	23.4105	NaN	22.5428	NaN	NaN	NaN	NaN	NaN	24.1516	NaN	NaN	26.9453	26.8224	26.9187	27.0432	17	17	86.3	30.354	0	126.78	6682100000	97
DERPT_G11514	Full=Beta-galactosidase ame: Full=Acid beta-galactosidase Short=Lactase Flags: Precursor cytoplasm,intracellular membrane-bounded organelle,extracellular region part,beta-galactosidase activity,galactose metabolic process,glycosaminoglycan catabolic proces	7	4	NaN	NaN	25.9739	27.7383	29.9245	29.9136	26.9734	22.8984	NaN	NaN	NaN	NaN	22.6738	NaN	NaN	NaN	NaN	NaN	NaN	NaN	26.8601	26.4674	27.9374	26.7831	22	22	33.9	82.052	0	126.18	14403000000	121
DERPT_G3691	Full=Peroxiredoxin-2 extracellular space,nucleus,mitochondrial matrix,early endosome,smooth endoplasmic reticulum,microtubule associated complex,IkappaB kinase complex,melanosome,myelin sheath,extracellular exosome,glutathione peroxidase activity,protein C	9	4	NaN	23.8994	28.5927	30.6066	27.9181	25.4621	NaN	23.5463	23.0815	NaN	22.2732	23.5522	NaN	NaN	NaN	NaN	NaN	NaN	NaN	NaN	26.5194	26.2769	27.0657	26.5532	12	12	53.4	29.915	0	125.47	12675000000	79
DERPT_G9564	Full=FK506-binding 2 ame: Full=Peptidyl-prolyl cis-trans isomerase Short=PPIase ame: Full=Rotamase Flags: Precursor vacuole,Golgi apparatus,cytosol,chloroplast,membrane,endoplasmic reticulum part,calcium ion binding,protein binding,isomerase activity,prote	7	4	NaN	NaN	NaN	NaN	NaN	NaN	NaN	22.6835	25.3978	27.4295	26.547	27.1123	26.165	24.6808	NaN	NaN	NaN	NaN	NaN	NaN	27.325	26.7801	27.2365	27.5201	19	19	72.5	23.368	0	125.47	6278100000	85
DERPT_G6775	Full=Translationally-controlled tumor homolog Short=TCTP extracellular space,nucleoplasm,polytene chromosome,plasma membrane,Ras guanyl-nucleotide exchange factor activity,transcription factor binding,double-strand break repair,mitotic G2 DNA damage checkp	3	4	NaN	NaN	NaN	NaN	NaN	NaN	NaN	NaN	NaN	NaN	NaN	25.4259	25.6142	25.9313	NaN	NaN	NaN	NaN	NaN	NaN	24.3088	24.3641	23.8238	24.5178	8	8	69.6	18.278	0	125.4	1178400000	29
DERPT_G8966	Full=Divalent-cation tolerance chloroplast,membrane,copper ion binding,protein localization,response to metal ion,protein homooligomerization	5	4	NaN	NaN	NaN	NaN	21.3791	NaN	NaN	22.2002	26.9451	27.5941	24.7026	NaN	NaN	NaN	NaN	NaN	NaN	NaN	NaN	NaN	24.5822	23.0582	25.1043	22.7623	6	6	56.1	12.995	0	125.29	1775600000	33
DERPT_G5805	Allergen Homolog (Der p8, Der f8, Tyr p8): Full=Glutathione S-transferase Mu 2 ame: Full=GST class-mu 2 ame: Full=GSTM2-2 extracellular region,cytosol,plasma membrane,myelin sheath,membrane-bounded organelle,protein-containing complex,glutathione transfera	14	4	23.691	22.635	24.0983	23.3521	24.6117	25.0268	25.7322	28.8736	29.1913	25.3889	21.3838	23.2558	22.1611	NaN	NaN	NaN	26.34	NaN	NaN	NaN	28.0716	26.1795	27.7082	26.8458	18	18	71.8	25.654	0	124.55	10968000000	97
DERPT_G9591	Full=Prohibitin-2 nucleolus,mitochondrial respiratory chain complex I,early endosome,vacuolar membrane,Golgi apparatus,lipid droplet,microtubule associated complex,integral component of plasma membrane,plant-type cell wall,plasmodesma,chloroplast,cell surf	0	4	NaN	NaN	NaN	NaN	NaN	NaN	NaN	NaN	NaN	NaN	NaN	NaN	NaN	NaN	NaN	NaN	NaN	NaN	NaN	NaN	24.851	25.9203	23.7048	25.1785	9	9	43.6	29.802	0	124.03	1198700000	24
DERPT_G7589	Full=Glutaryl- mitochondrial Short=GCD Flags: Precursor mitochondrial inner membrane,mitochondrial matrix,peroxisome,integral component of membrane,fatty-acyl-CoA binding,acyl-CoA oxidase activity,glutaryl-CoA dehydrogenase activity,electron transfer activ	18	4	25.146	23.5472	24.4781	26.5946	25.6641	26.4564	26.3568	25.1668	24.1984	24.7171	23.3811	25.1161	26.4485	26.9878	24.0749	25.758	25.8612	25.4286	NaN	NaN	27.6922	28.6842	26.4095	27.9963	20	20	23.9	112.43	0	123.84	9570600000	108
DERPT_G1701	Full=Macrophage migration inhibitory factor Short=MIF ame: Full=L-dopachrome isomerase ame: Full=L-dopachrome tautomerase ame: Full=Phenylpyruvate tautomerase extracellular space,myelin sheath,membrane-bounded organelle,cytokine activity,phenylpyruvate tau	10	4	NaN	NaN	NaN	NaN	NaN	NaN	NaN	NaN	25.9271	26.5044	26.4694	28.3176	31.0145	29.373	25.1705	25.3368	26.3315	25.0747	NaN	NaN	24.5111	24.108	26.183	24.5345	8	8	76.3	13.001	0	123.61	5710100000	45
DERPT_G212	Full=Polyubiquitin Contains: ame: Full=Ubiquitin Flags: Precursor extracellular space,cell wall,nucleus,vacuole,ribosome,microtubule associated complex,myelin sheath,extracellular exosome,protease binding,structural constituent of ribosome,calcium ion bind	19	4	26.7802	26.2952	24.6951	25.133	24.7652	25.0457	25.2687	25.8714	25.8162	25.8204	26.9301	30.1369	30.5886	28.0449	24.0849	NaN	23.6946	25.5259	25.7661	26.8673	28.3186	28.6419	28.2273	28.5359	19	19	22.5	287.21	0	123.53	15255000000	114
DERPT_G5162	Full=Solute carrier family 12 member 1 ame: Full=Bumetanide-sensitive sodium-(potassium)-chloride cotransporter 2 ame: Full=Kidney-specific Na-K-Cl symporter cytosol,endomembrane system,integral component of membrane,basolateral plasma membrane,apical plas	1	4	24.6716	NaN	NaN	NaN	NaN	NaN	NaN	NaN	NaN	NaN	NaN	NaN	NaN	NaN	NaN	NaN	NaN	NaN	NaN	NaN	26.9192	27.7734	24.7304	27.5225	29	29	28.8	116.81	0	123.36	4660000000	87
DERPT_G7622	Full=Dynein light chain cytoplasmic kinetochore,nuclear pore,mitochondrion,peroxisome,centriole,cytosol,cytoplasmic dynein complex,cytoplasmic microtubule,plasma membrane,COP9 signalosome,myosin complex,nuclear periphery,extracellular exosome,mitotic spind	5	4	NaN	NaN	NaN	NaN	NaN	NaN	NaN	NaN	NaN	25.505	27.2616	27.5873	26.299	25.1551	NaN	NaN	NaN	NaN	NaN	NaN	26.1845	25.9232	24.9578	25.4532	9	9	87.8	10.343	0	123.15	2151600000	40
DERPT_G104	Full=Aryl-hydrocarbon-interacting -like 1 photoreceptor inner segment,cytosol,membrane,aryl hydrocarbon receptor complex,intracellular membrane-bounded organelle,extracellular exosome,transcription coregulator activity,aryl hydrocarbon receptor binding,ret	1	4	NaN	NaN	NaN	NaN	NaN	NaN	NaN	NaN	NaN	NaN	NaN	NaN	NaN	NaN	25.636	NaN	NaN	NaN	NaN	NaN	24.826	25.1638	25.1173	24.8691	19	19	29.3	93.986	0	122.98	1075600000	43
DERPT_G10199	Full=Fibulin-1 Short=FIBL-1 Flags: Precursor basement membrane,extracellular space,membrane-bounded organelle,protein-containing complex,cell part,calcium ion binding,peptidase activator activity,protein-containing complex binding,heart development,negativ	11	4	NaN	24.4687	24.5624	24.1279	23.3407	25.443	25.3498	24.7466	NaN	NaN	24.734	26.1399	25.2437	NaN	24.8439	NaN	NaN	NaN	NaN	NaN	24.2399	24.248	24.2312	24.2676	10	10	16.9	98.496	0	122.76	1748300000	50
DERPT_G9243	Full= isoforms D E Flags: Precursor nuclear lamina,polytene chromosome,spindle,nuclear matrix,monooxygenase activity,structural molecule activity,metabolic process,spindle assembly	1	4	NaN	NaN	NaN	NaN	NaN	NaN	NaN	NaN	23.3221	NaN	NaN	NaN	NaN	NaN	NaN	NaN	NaN	NaN	NaN	NaN	26.5361	26.4662	25.7412	26.4681	13	13	19.7	127.9	0	122.42	2566300000	48
DERPT_G8145	Full=26S proteasome regulatory subunit 6B homolog cell wall,nucleoplasm,plasma membrane,proteasome regulatory particle, base subcomplex,plasmodesma,inclusion body,nuclear proteasome complex,cytosolic proteasome complex,ATP binding,TBP-class protein binding	9	4	22.5855	22.5825	25.7446	28.3247	27.6266	27.9355	24.3598	NaN	NaN	NaN	NaN	25.1578	23.4525	NaN	NaN	NaN	NaN	NaN	NaN	NaN	23.0003	23.7596	22.442	23.8694	14	14	49	47.255	0	121.93	3677400000	62
DERPT_G5557	---NA---	8	4	25.8292	NaN	NaN	NaN	NaN	NaN	NaN	NaN	NaN	NaN	NaN	NaN	NaN	26.1138	28.7877	28.767	29.0172	28.7924	29.233	28.9203	23.9491	24.8945	23.2648	25.4835	8	8	23.8	52.236	0	121.86	2032000000	47
DERPT_G5222	Full=40S ribosomal S6 nucleolus,polysome,cell surface,membrane,cytosolic small ribosomal subunit,dendrite,yeast-form cell wall,cytoplasmic ribonucleoprotein granule,cell body,perinuclear region of cytoplasm,mRNA binding,structural constituent of ribosome,p	5	4	26.851	NaN	NaN	NaN	NaN	24.3943	NaN	NaN	NaN	NaN	25.2633	28.1867	29.8949	NaN	NaN	NaN	NaN	NaN	NaN	NaN	26.0181	26.6594	25.227	26.866	16	16	46.7	28.134	0	121.39	5027000000	65
DERPT_G5151	Full=Isochorismatase domain-containing 2 nucleus,mitochondrion,peroxisome,extracellular exosome,catalytic activity,metabolic process,protein destabilization	5	4	NaN	NaN	NaN	NaN	NaN	23.5427	26.754	27.7941	26.2553	23.5729	NaN	NaN	NaN	NaN	NaN	NaN	NaN	NaN	NaN	NaN	25.8611	25.5029	26.1163	25.3828	11	11	59.4	22.946	0	121.39	3872400000	44
DERPT_G9291	Full=Alpha-N-acetylglucosaminidase ame: Full=N-acetyl-alpha-glucosaminidase Short=NAG Contains: ame: Full=Alpha-N-acetylglucosaminidase 82 kDa form Contains: ame: Full=Alpha-N-acetylglucosaminidase 77 kDa form Flags: Precursor lysosome,extracellular exosom	0	4	NaN	NaN	NaN	NaN	NaN	NaN	NaN	NaN	NaN	NaN	NaN	NaN	NaN	NaN	NaN	NaN	NaN	NaN	NaN	NaN	25.7213	25.5301	25.3334	25.6449	17	17	15.6	193.37	0	121.12	1589400000	50
DERPT_G3186	Full=UV excision repair RAD23 homolog B protein-containing complex,nuclear part,cytoplasmic part,damaged DNA binding,ubiquitin binding,nucleotide-excision repair,spermatogenesis,proteasome-mediated ubiquitin-dependent protein catabolic process,regulation o	3	4	NaN	NaN	NaN	NaN	NaN	NaN	NaN	NaN	NaN	NaN	27.1843	28.6542	27.689	NaN	NaN	NaN	NaN	NaN	NaN	NaN	23.645	23.2744	24.0184	23.8235	6	6	23.7	41.847	0	120.56	1955400000	20
DERPT_G10720	Full=Deoxyribonuclease-2-alpha ame: Full=Acid DNase ame: Full=Deoxyribonuclease II alpha Short=DNase II alpha ame: Full=Lysosomal DNase II Flags: Precursor membrane-bounded organelle,intracellular part,deoxyribonuclease II activity,DNA catabolic process,mu	7	4	NaN	NaN	17.4037	NaN	20.3868	18.0246	22.9775	27.6863	27.3616	25.0071	NaN	NaN	NaN	NaN	NaN	NaN	NaN	NaN	NaN	NaN	27.4472	27.4018	27.4669	27.0473	18	18	54.3	48.454	0	119.2	6031400000	70
DERPT_G9157	Full=Proteasome-activating nucleotidase Short=PAN ame: Full=Proteasomal ATPase ame: Full=Proteasome regulatory ATPase ame: Full=Proteasome regulatory particle P-body,plasma membrane,proteasome regulatory particle, base subcomplex,nuclear proteasome complex	0	4	NaN	NaN	NaN	NaN	NaN	NaN	NaN	NaN	NaN	NaN	NaN	NaN	NaN	NaN	NaN	NaN	NaN	NaN	NaN	NaN	23.1816	23.6748	22.7828	23.8576	14	14	39.3	47.506	0	119.2	978890000	34
DERPT_G5260	Full=E3 ubiquitin- ligase sina ame: Full=RING-type E3 ubiquitin transferase sina ame: Full=Seven in absentia ubiquitin ligase complex,basement membrane,extracellular space,nucleoplasm,mitochondrion,early endosome,cytosol,plasma membrane,beta-catenin destru	3	3	NaN	NaN	NaN	NaN	NaN	NaN	NaN	22.5064	24.9424	23.8595	NaN	NaN	NaN	NaN	NaN	NaN	NaN	NaN	NaN	NaN	23.1435	NaN	23.5071	22.5877	6	6	14.1	56.166	0	118.98	355810000	16
DERPT_G8058	Full=Farnesyl pyrophosphate synthase Short=FPP synthase Short=FPS ame: Full=(2E,6E)-farnesyl diphosphate synthase ame: Full=Dimethylallyltranstransferase ame: Full=Farnesyl diphosphate synthase ame: Full=Geranyltranstransferase mitochondrion,peroxisome,end	7	4	NaN	NaN	NaN	NaN	NaN	23.137	NaN	NaN	NaN	26.1997	29.2802	29.087	26.6134	24.9133	24.9999	NaN	NaN	NaN	NaN	NaN	26.4945	25.8621	26.1138	26.7853	16	16	18.4	64.349	0	118.72	6821300000	84
DERPT_G5598	Full=Di-N-acetylchitobiase Flags: Precursor extracellular region,hydrolase activity,carbohydrate metabolic process	6	4	NaN	NaN	22.6979	23.2733	22.4805	26.4444	28.4	26.0717	NaN	NaN	NaN	NaN	NaN	NaN	NaN	NaN	NaN	NaN	NaN	NaN	26.0497	26.1335	27.6914	25.8127	17	17	45.2	42.765	0	118.33	5499100000	62
DERPT_G3620	Full= snRNP Sm P-body,nucleoplasm,U6 snRNP,nucleolus,small nucleolar ribonucleoprotein complex,cytosol,U4/U6 x U5 tri-snRNP complex,precatalytic spliceosome,catalytic step 2 spliceosome,Lsm1-7-Pat1 complex,protein binding,U6 snRNA 3-end binding,mRNA splic	5	4	NaN	NaN	NaN	NaN	NaN	23.6703	27.2182	26.4135	24.9662	23.9697	NaN	NaN	NaN	NaN	NaN	NaN	NaN	NaN	NaN	NaN	24.6692	23.8992	24.2613	24.0959	6	6	76.5	11.819	0	118.26	2033700000	34
DERPT_G8825	Full=Phosphoglucosamine mutase nucleus,mitochondrion,cytosol,plasmodesma,phosphoacetylglucosamine mutase activity,phosphoglucomutase activity,photoreactive repair,UDP-N-acetylglucosamine biosynthetic process,protein glycosylation,spermatogenesis,response t	5	3	NaN	NaN	NaN	NaN	NaN	NaN	NaN	23.674	NaN	NaN	NaN	25.0339	27.0531	26.7814	25.357	NaN	NaN	NaN	NaN	NaN	25.0192	25.734	NaN	24.9948	16	16	39.5	59.448	0	118.17	1348600000	37
DERPT_G10145	Full=Lysosomal alpha-mannosidase Short=Laman ame: Full=Lysosomal acid alpha-mannosidase ame: Full=Mannosidase alpha class 2B member 1 ame: Full=Mannosidase alpha-B Flags: Precursor extracellular region,cell wall,vacuole,Golgi apparatus part,bounding membra	5	4	NaN	NaN	NaN	NaN	NaN	22.7411	25.5688	25.7825	23.0687	NaN	NaN	NaN	NaN	NaN	24.0236	NaN	NaN	NaN	NaN	NaN	25.4425	25.0517	25.187	25.7482	23	23	23.4	192.56	0	117.86	2091300000	64
DERPT_G11363	Full=Lactoylglutathione lyase ame: Full=Aldoketomutase ame: Full=Glyoxalase I Short=Glx I ame: Full=Ketone-aldehyde mutase ame: Full=Methylglyoxalase ame: Full=S-D-lactoylglutathione methylglyoxal lyase mitochondrion,cell-cell adherens junction,plastid,ext	5	4	NaN	NaN	NaN	NaN	NaN	NaN	NaN	22.2504	26.664	27.2008	24.6633	23.3848	NaN	NaN	NaN	NaN	NaN	NaN	NaN	NaN	26.4708	25.6351	26.1633	26.4169	14	14	61.5	34.295	0	117.25	3394200000	62
DERPT_G7921	Full=Vacuolar sorting-associated 26B ame: Full=Vesicle sorting 26B early endosome,late endosome,cytosol,endosome membrane,retromer, cargo-selective complex,intracellular membrane-bounded organelle,extracellular exosome,tubular endosome,protein binding,prot	0	4	NaN	NaN	NaN	NaN	NaN	NaN	NaN	NaN	NaN	NaN	NaN	NaN	NaN	NaN	NaN	NaN	NaN	NaN	NaN	NaN	25.13	24.8622	23.2621	24.9352	11	11	39.2	44.314	0	117.22	906070000	29
DERPT_G11461	Full=Testis-specific serine threonine- kinase 1 Short=TSK-1 Short=TSK1 Short=TSSK-1 Short=Testis-specific kinase 1 ame: Full=Serine threonine- kinase 22A acrosomal vesicle,centriole,motile cilium,magnesium ion binding,protein serine/threonine kinase activi	8	4	NaN	NaN	NaN	NaN	NaN	NaN	NaN	21.2392	26.7714	27.9374	27.4881	27.6607	25.5006	24.4011	NaN	NaN	NaN	25.0489	NaN	NaN	28.415	27.9031	28.4665	28.4488	26	26	29.3	120.96	0	117.12	11151000000	124
DERPT_G9698	Full=Lysosomal alpha-glucosidase ame: Full=Acid maltase Flags: Precursor extracellular region,cell wall,lysosome,membrane,alpha-1,4-glucosidase activity,carbohydrate binding,regulation of the force of heart contraction,diaphragm contraction,heart morphogen	3	4	NaN	NaN	NaN	NaN	NaN	24.6784	24.9548	23.8919	NaN	NaN	NaN	NaN	NaN	NaN	NaN	NaN	NaN	NaN	NaN	NaN	25.3605	25.0774	25.4246	25.1427	15	9	25.1	108.21	0	117.11	1536200000	31
DERPT_G1361	Full=Transmembrane 50B autophagosome,endoplasmic reticulum,membrane,recycling endosome,protein kinase binding,negative regulation of autophagy,regulation of GTPase activity,cellular process,recycling endosome to Golgi transport,regulation of cilium assembl	4	4	NaN	NaN	NaN	NaN	NaN	NaN	NaN	NaN	23.1725	25.7119	25.2409	25.2681	NaN	NaN	NaN	NaN	NaN	NaN	NaN	NaN	23.0128	23.2819	24.7948	23.3494	8	8	10.5	125.21	0	116.45	863950000	37
DERPT_G1704	Full=NADH dehydrogenase mitochondrial respiratory chain complex I,mitochondrial small ribosomal subunit,myelin sheath,plasma membrane respiratory chain complex I,structural constituent of ribosome,NADH dehydrogenase (ubiquinone) activity,zinc ion binding,s	8	4	NaN	NaN	23.1275	23.3847	24.277	25.4607	26.2792	27.9031	27.3311	23.6423	NaN	NaN	NaN	NaN	NaN	NaN	NaN	NaN	NaN	NaN	26.3947	26.3794	27.2039	27.051	14	14	28.5	76.776	0	116.4	6319300000	68
DERPT_G5262	Full=F-actin-capping subunit beta acrosomal vesicle,cytosol,dynactin complex,actin filament,plasma membrane,brush border,cell-cell adherens junction,cellular bud tip,F-actin capping protein complex,intercalated disc,Z disc,lamellipodium,actin cortical patc	6	4	NaN	NaN	NaN	NaN	25.0312	25.0036	27.173	28.357	26.5624	24.8178	NaN	NaN	NaN	NaN	NaN	NaN	NaN	NaN	NaN	NaN	27.3843	27.1691	26.2173	27.3577	16	16	61.4	30.835	0	116.33	7443300000	72
DERPT_G3746	Full=CUB domain-containing 2 Flags: Precursor membrane	4	4	NaN	NaN	NaN	NaN	NaN	NaN	NaN	NaN	NaN	26.1163	24.9321	NaN	25.2607	NaN	25.4275	NaN	NaN	NaN	NaN	NaN	25.1373	25.0685	25.7279	25.002	17	17	11.6	179.44	0	116.31	1616300000	43
DERPT_G11705	Full=T-complex 1 subunit epsilon Short=TCP-1-epsilon ame: Full=CCT-epsilon zona pellucida receptor complex,nucleolus,centrosome,chaperonin-containing T-complex,microtubule,plasma membrane,plasmodesma,myelin sheath,cell body,extracellular exosome,nucleic ac	12	4	27.2396	27.7313	28.2661	25.8144	24.437	22.9611	23.3639	NaN	NaN	NaN	NaN	26.1214	28.1856	28.2171	27.2685	NaN	25.9847	NaN	NaN	NaN	25.5203	26.8401	24.7465	26.4466	29	29	34.2	100.32	0	115.56	4063100000	87
DERPT_G1480	Full=Phenazine biosynthesis-like domain-containing catalytic activity,biosynthetic process,negative regulation of cellular process	8	4	23.268	NaN	23.1002	23.5243	22.7723	24.213	26.1633	25.6007	23.2233	NaN	NaN	NaN	NaN	NaN	NaN	NaN	NaN	NaN	NaN	NaN	25.5869	25.6112	24.4483	25.828	11	11	29.3	48.201	0	115.56	2243800000	48
DERPT_G6640	Full=Gamma-glutamyl phosphate reductase Short=GPR ame: Full=Glutamate-5-semialdehyde dehydrogenase ame: Full=Glutamyl-gamma-semialdehyde dehydrogenase Short=GSA dehydrogenase mitochondrial inner membrane,cytosol,plasmodesma,chloroplast,nucleotide binding,g	0	2	NaN	NaN	NaN	NaN	NaN	NaN	NaN	NaN	NaN	NaN	NaN	NaN	NaN	NaN	NaN	NaN	NaN	NaN	NaN	NaN	NaN	24.3366	NaN	23.4636	7	7	11.7	91.88	0	114.77	299080000	12
DERPT_G5906	Full=Glutathione S-transferase kappa 1 ame: Full=GST 13-13 ame: Full=GST class-kappa ame: Full=GSTK1-1 Short=mGSTK1 ame: Full=Glutathione S-transferase subunit 13 mitochondrial inner membrane,mitochondrial matrix,glutathione transferase activity,glutathion	4	4	NaN	NaN	NaN	NaN	NaN	NaN	23.0379	27.6927	27.866	24.3737	NaN	NaN	NaN	NaN	NaN	NaN	NaN	NaN	NaN	NaN	24.9062	24.1045	24.5194	24.5331	10	10	64.6	26.412	0	114.3	2968000000	31
DERPT_G11094	Full=Isovaleryl- mitochondrial Short=IVD Flags: Precursor nucleus,mitochondrial matrix,mitochondrial membrane,fatty-acyl-CoA binding,ATP binding,isovaleryl-CoA dehydrogenase activity,electron transfer activity,flavin adenine dinucleotide binding,oxidoreduc	0	4	NaN	NaN	NaN	NaN	NaN	NaN	NaN	NaN	NaN	NaN	NaN	NaN	NaN	NaN	NaN	NaN	NaN	NaN	NaN	NaN	25.8914	26.1331	24.7832	25.9527	16	16	56.7	51.358	0	114.17	1764200000	42
DERPT_G8368	Full=60S ribosome subunit biogenesis NIP7 homolog nucleolus,mitochondrion,preribosome, large subunit precursor,RNA binding,lipase activity,malate dehydrogenase activity,carboxylic ester hydrolase activity,malate metabolic process,ribosome assembly,ribosoma	5	4	NaN	NaN	NaN	23.4223	NaN	22.3102	24.5575	25.5582	23.1608	NaN	NaN	NaN	NaN	NaN	NaN	NaN	NaN	NaN	NaN	NaN	25.1793	26.7261	23.9871	25.1264	11	11	28.9	83.658	0	113.88	2159200000	46
DERPT_G5746	Allergen Homolog (Gal d7): Full=Myosin light chain 1 skeletal muscle isoform Short=MLC1 MLC3 Short=MLC1F MLC3F ame: Full=Myosin light chain alkali 1 2 Short=Myosin light chain A1 A2 cytosol,brush border,membrane,myosin II complex,extracellular matrix,myosi	3	4	NaN	NaN	NaN	NaN	NaN	NaN	NaN	NaN	NaN	NaN	25.0403	25.763	23.2421	NaN	NaN	NaN	NaN	NaN	NaN	NaN	24.4038	23.6189	24.6285	23.8192	7	7	16.2	63.326	0	113.32	668660000	16
DERPT_G9483	Full=Histone-binding RBBP7 ame: Full=Nucleosome-remodeling factor subunit RBAP46 ame: Full=Retinoblastoma-binding 7 Short=RBBP-7 transcription factor complex,polytene chromosome,Sin3 complex,NuRD complex,NURF complex,ACF complex,Myb complex,CAF-1 complex,E	6	3	NaN	NaN	NaN	NaN	NaN	NaN	25.1563	NaN	NaN	NaN	NaN	NaN	24.8018	26.2493	27.0785	27.6207	26.4621	NaN	NaN	NaN	25.4886	24.9749	NaN	24.4482	9	9	41.3	47.921	0	113.24	1039800000	29
DERPT_G8730	Full=Cysteine and glycine-rich 1 ame: Full=Cysteine-rich 1 Short=CRP Short=CRP1 stress fiber,nucleus,focal adhesion,Z disc,cell leading edge,AT DNA binding,zinc ion binding,DNA binding, bending,structural constituent of muscle,telethonin binding,peptide bi	20	4	26.7184	25.9083	25.9731	25.7553	25.6498	25.3579	25.2547	25.2563	25.5124	26.3638	27.123	28.8109	30.2912	30.674	30.642	29.1967	28.8384	28.9813	27.5237	27.3171	26.3887	26.2851	27.0113	26.2724	5	2	19	34.332	0	112.99	11313000000	90
DERPT_G10855	Full=Phosphoglucomutase Short=PGM ame: Full=Alpha-phosphoglucomutase ame: Full=Glucose phosphomutase cytoplasm,membrane-bounded organelle,phosphoglucomutase activity,glucose-1,6-bisphosphate synthase activity,purine ribonucleoside catabolic process,starch	6	4	22.5414	NaN	NaN	NaN	22.8773	NaN	23.567	26.4333	25.0125	NaN	NaN	NaN	NaN	25.6594	NaN	NaN	NaN	NaN	NaN	NaN	27.1457	27.2016	25.6955	27.1638	26	26	51.5	70.294	0	112.87	4436400000	82
DERPT_G8246	Allergen Homolog (Der p8, Der f8, Tyr p8): Full=Glutathione S-transferase Mu 2 ame: Full=GST class-mu 2 ame: Full=GSTM2-2 extracellular region,myelin sheath,membrane-bounded organelle,protein-containing complex,cytoplasmic part,glutathione transferase acti	19	4	26.1607	24.2594	24.5855	23.894	22.4044	23.3843	23.0869	26.3712	27.8887	25.6757	23.542	24.2291	23.0985	24.0466	NaN	23.8765	25.2694	23.8682	24.2282	23.7733	27.826	28.2539	27.4209	28.4324	16	15	85	25.54	0	112.62	8327600000	93
DERPT_G9885	Full=Mannose-6-phosphate isomerase ame: Full=Phosphohexomutase ame: Full=Phosphomannose isomerase Short=PMI cytoplasm,membrane-bounded organelle,mannose-6-phosphate isomerase activity,zinc ion binding,glycoprotein biosynthetic process,GDP-mannose biosynthe	12	4	24.8211	23.9653	21.8355	23.247	NaN	23.7621	25.0782	25.4026	27.2043	25.6827	23.2016	NaN	NaN	NaN	25.5279	NaN	25.8737	NaN	NaN	NaN	26.6668	26.9898	24.147	27.573	17	17	25.5	81.518	0	112.52	5318200000	60
DERPT_G11459	Full=Cytochrome P450 3A4 ame: Full=1,8-cineole 2-exo-monooxygenase ame: Full=Albendazole monooxygenase ame: Full=Albendazole sulfoxidase ame: Full=CYPIIIA3 ame: Full=CYPIIIA4 ame: Full=Cholesterol 25-hydroxylase ame: Full=Cytochrome P450 3A3 ame: Full=Cyto	0	4	NaN	NaN	NaN	NaN	NaN	NaN	NaN	NaN	NaN	NaN	NaN	NaN	NaN	NaN	NaN	NaN	NaN	NaN	NaN	NaN	26.2566	27.3463	25.1568	26.4976	21	21	42.1	81.991	0	112.46	3113300000	72
DERPT_G9200	--NA--	0	4	NaN	NaN	NaN	NaN	NaN	NaN	NaN	NaN	NaN	NaN	NaN	NaN	NaN	NaN	NaN	NaN	NaN	NaN	NaN	NaN	23.9794	23.9417	25.687	24.1025	7	7	49.3	15.503	0	112.45	999350000	19
DERPT_G9761	Full=Dihydropteridine reductase ame: Full=HDHPR ame: Full=Quinoid dihydropteridine reductase mitochondrion,cytosol,neuron projection,extracellular exosome,6,7-dihydropteridine reductase activity,electron transfer activity,protein homodimerization activity,	9	4	21.7061	NaN	NaN	NaN	NaN	NaN	NaN	24.8821	25.425	NaN	NaN	NaN	24.384	26.1212	26.7104	25.6217	23.8334	NaN	23.5853	NaN	26.5642	27.6747	23.8802	27.3609	14	14	56.4	26.565	0	112.44	4725100000	65
DERPT_G12	Full=Sorbitol dehydrogenase ame: Full=L-iditol 2-dehydrogenase mitochondrion,cytosol,plasmodesma,membrane,motile cilium,L-iditol 2-dehydrogenase activity,metal ion binding,sorbitol metabolic process,response to metal ion,flagellated sperm motility,biosynth	2	4	23.4482	NaN	NaN	NaN	NaN	NaN	NaN	NaN	NaN	NaN	NaN	NaN	NaN	NaN	24.788	NaN	NaN	NaN	NaN	NaN	26.2383	27.0621	24.5385	26.6327	26	26	51.9	78.501	0	112.34	2710700000	76
DERPT_G10548	Full=D-amino-acid oxidase Short=DAAO Short=DAMOX Short=DAO cytoplasmic part,D-aspartate oxidase activity,FAD binding,aspartate metabolic process,insemination,grooming behavior,D-amino acid catabolic process,hormone metabolic process,oxidation-reduction pro	6	4	NaN	NaN	NaN	25.1007	26.3018	25.674	26.7816	26.8127	24.4536	NaN	NaN	NaN	NaN	NaN	NaN	NaN	NaN	NaN	NaN	NaN	25.9704	25.1114	24.9327	25.0414	13	13	54.6	37.758	0	112.2	3313100000	47
DERPT_G10436	Full= transport SEC23 Golgi membrane,endoplasmic reticulum,COPII vesicle coat,perinuclear region of cytoplasm,protein binding,zinc ion binding,intracellular protein transport,pectoral fin morphogenesis,embryonic neurocranium morphogenesis,cartilage develop	0	4	NaN	NaN	NaN	NaN	NaN	NaN	NaN	NaN	NaN	NaN	NaN	NaN	NaN	NaN	NaN	NaN	NaN	NaN	NaN	NaN	24.1577	25.2285	22.2195	25.0381	14	14	26.9	86.967	0	111.83	1014700000	32
DERPT_G10665	Full=Probable methylthioribulose-1-phosphate dehydratase Short=MTRu-1-P dehydratase cytoplasm,zinc ion binding,identical protein binding,methylthioribulose 1-phosphate dehydratase activity,L-methionine salvage from S-adenosylmethionine,L-methionine salvage	1	4	NaN	NaN	NaN	NaN	NaN	NaN	24.0994	NaN	NaN	NaN	NaN	NaN	NaN	NaN	NaN	NaN	NaN	NaN	NaN	NaN	24.1538	24.1799	24.6909	24.2223	11	11	20.6	95.468	0	111.68	706370000	27
DERPT_G1132	Full=40S ribosomal S8 cell wall,nucleolus,Golgi apparatus,plasma membrane,focal adhesion,plasmodesma,chloroplast,cytosolic small ribosomal subunit,90S preribosome,extracellular exosome,mRNA binding,structural constituent of ribosome,reproduction,maturation	2	4	24.7378	NaN	NaN	NaN	NaN	NaN	NaN	NaN	NaN	NaN	NaN	NaN	NaN	NaN	27.256	NaN	NaN	NaN	NaN	NaN	25.557	26.6348	24.96	26.4156	13	13	54.8	26.448	0	111.64	3588300000	55
DERPT_G9603	Full=Coronin-1B ame: Full=Coronin-2 stress fiber,immunological synapse,early endosome,cytosol,actin filament,cell-cell adherens junction,focal adhesion,cell cortex,lateral plasma membrane,flotillin complex,lamellipodium,axon,phagocytic vesicle,perinuclear	3	4	NaN	NaN	NaN	NaN	NaN	NaN	NaN	NaN	NaN	NaN	22.2886	22.0653	18.7585	NaN	NaN	NaN	NaN	NaN	NaN	NaN	24.1286	26.9838	22.2779	25.724	16	16	52.7	56.698	0	111.27	1992700000	56
DERPT_G6647	Full=Cystatin-B ame: Full=Stefin-B cytoplasm,membrane-bounded organelle,extracellular region part,cysteine-type endopeptidase inhibitor activity,protein binding,adult locomotory behavior,negative regulation of endopeptidase activity	10	4	NaN	NaN	23.9455	NaN	NaN	23.9829	23.9813	24.3943	27.2567	26.7946	25.8098	25.4437	26.2208	25.7213	NaN	NaN	NaN	NaN	NaN	NaN	26.0148	25.0757	26.8472	25.9776	9	9	70.7	13.476	0	110.95	3943500000	48
DERPT_G6773	Full=C-terminal-binding 2 Short= 2 nucleoplasm,transcription factor complex,polytene chromosome,cytoplasm,transcriptional repressor complex,cell junction,ISWI-type complex,ribbon synapse,transcription corepressor activity,nucleic acid binding,chromatin bin	6	4	NaN	NaN	24.1971	24.0677	25.2224	25.4389	24.548	NaN	24.2048	NaN	NaN	NaN	NaN	NaN	NaN	NaN	NaN	NaN	NaN	NaN	26.0506	26.0761	24.9433	26.1099	13	13	45.9	46.012	0	110.15	2798300000	39
DERPT_G3320	Full=Adenylyl cyclase-associated 1 Short=CAP 1 extracellular space,postsynaptic density,actin cortical patch,mating projection tip,actin binding,adenylate cyclase binding,cell morphogenesis,ameboidal-type cell migration,receptor-mediated endocytosis,Ras pr	6	4	NaN	NaN	22.7033	23.8027	25.426	28.0972	26.7009	21.876	NaN	NaN	NaN	NaN	NaN	NaN	NaN	NaN	NaN	NaN	NaN	NaN	24.7632	24.1219	24.6046	24.3203	13	13	41.5	40.733	0	109.96	2683800000	47
DERPT_G10786	Full=Proliferating cell nuclear antigen Short=PCNA cyclin-dependent protein kinase holoenzyme complex,nuclear chromosome, telomeric region,nuclear lamina,nucleoplasm,nucleolus,centrosome,cytosol,microtubule associated complex,nuclear replication fork,PCNA	6	4	NaN	NaN	NaN	NaN	NaN	26.8418	27.9879	26.1118	25.9583	24.5246	NaN	23.4601	NaN	NaN	NaN	NaN	NaN	NaN	NaN	NaN	26.2664	26.0713	27.0359	26.184	8	8	43.3	29.615	0	109.18	5437900000	60
DERPT_G9216	Full=Pyruvate dehydrogenase E1 component subunit alpha mitochondrial alpha-ketoglutarate dehydrogenase complex,alpha-ketoacid dehydrogenase activity,3-methyl-2-oxobutanoate dehydrogenase (2-methylpropanoyl-transferring) activity,2-dehydropantoate 2-reducta	6	4	NaN	NaN	NaN	22.366	22.9682	26.4422	24.4192	NaN	NaN	NaN	NaN	NaN	22.0979	21.6538	NaN	NaN	NaN	NaN	NaN	NaN	23.6865	23.5635	21.7929	23.6219	16	16	39.2	56.291	0	109.07	912190000	36
DERPT_G1281	---NA---	6	4	23.9245	NaN	NaN	NaN	23.0153	27.1116	28.8993	25.4862	24.2547	NaN	NaN	NaN	NaN	NaN	NaN	NaN	NaN	NaN	NaN	NaN	26.2745	26.0297	26.4344	26.6838	11	11	39.6	28.821	0	109.04	6259800000	51
DERPT_G5458	Full=Probable bifunctional chitinase lysozyme Includes: ame: Full=Chitinase Includes: ame: Full=Lysozyme Flags: Precursor extracellular region,chitin binding,chitin metabolic process	5	4	NaN	NaN	NaN	NaN	NaN	NaN	NaN	23.8923	25.5295	25.0591	24.7172	24.1352	NaN	NaN	NaN	NaN	NaN	NaN	NaN	NaN	25.3224	25.1105	24.8452	25.6494	10	10	35.6	43.15	0	108.71	1770100000	38
DERPT_G1330	Full=Leucine carboxyl methyltransferase 1 ame: Full= phosphatase methyltransferase 1 ame: Full= mitochondrion,membrane part,intracellular organelle part,binding,methyltransferase activity,tRNA processing,methylation,macromolecule modification,cellular proc	0	4	NaN	NaN	NaN	NaN	NaN	NaN	NaN	NaN	NaN	NaN	NaN	NaN	NaN	NaN	NaN	NaN	NaN	NaN	NaN	NaN	24.1635	24.5326	23.4712	24.4602	19	19	13.3	221	0	108.38	1595700000	47
DERPT_G5696	Full=Voltage-dependent anion-selective channel 2 Short=VDAC-2 ame: Full=Outer mitochondrial membrane porin 2 mitochondrial outer membrane,mitochondrial inner membrane,lipid droplet,microtubule associated complex,endomembrane system,Nebenkern,vesicle,myelin	0	4	NaN	NaN	NaN	NaN	NaN	NaN	NaN	NaN	NaN	NaN	NaN	NaN	NaN	NaN	NaN	NaN	NaN	NaN	NaN	NaN	26.6893	27.7822	25.514	27.1173	15	15	31.1	55.157	0	107.89	4121300000	49
DERPT_G7872	Full= NDRG3 ame: Full=N-myc downstream-regulated gene 3 plasma membrane,microtubule cytoskeleton,membrane-bounded organelle,membrane part,cytoplasmic part,intracellular organelle part,protein binding,negative regulation of cell proliferation,neurogenesis,c	3	4	24.8124	NaN	NaN	NaN	NaN	NaN	NaN	NaN	24.0328	24.5093	NaN	NaN	NaN	NaN	NaN	NaN	NaN	NaN	NaN	NaN	25.7368	26.5447	25.1356	25.5502	16	16	51.4	42.321	0	107.48	2104200000	44
DERPT_G986	Full=Methylmalonyl- mitochondrial Short=MCM ame: Full=Methylmalonyl- isomerase Flags: Precursor mitochondrial matrix,plasma membrane,methylmalonyl-CoA mutase activity,cobalamin binding,metal ion binding,modified amino acid binding,post-embryonic developmen	5	4	NaN	NaN	NaN	NaN	NaN	26.6284	24.5136	22.415	NaN	23.0644	NaN	NaN	NaN	NaN	NaN	22.8667	NaN	NaN	NaN	NaN	24.4126	25.0766	23.7096	24.5478	21	21	43.7	83.188	0	107.38	1684700000	56
DERPT_G9188	---NA---	10	4	NaN	NaN	NaN	NaN	NaN	NaN	NaN	23.8011	26.8934	28.6705	27.6974	28.3074	29.8293	29.7804	27.7062	26.6818	26.4745	NaN	NaN	NaN	25.2696	24.847	25.4935	26.5672	8	8	21.4	45.736	0	107.28	5902000000	50
DERPT_G9742	Full=Probable ubiquitin carboxyl-terminal hydrolase creB ame: Full=Carbon catabolite repression B ame: Full=Deubiquitinating enzyme creB ame: Full=Ubiquitin thioesterase creB ame: Full=Ubiquitin-hydrolyzing enzyme creB ame: Full=Ubiquitin-specific-processi	0	4	NaN	NaN	NaN	NaN	NaN	NaN	NaN	NaN	NaN	NaN	NaN	NaN	NaN	NaN	NaN	NaN	NaN	NaN	NaN	NaN	23.7056	23.3953	23.6366	23.4996	5	5	7.4	76.08	0	107.17	861970000	12
DERPT_G933	Full=Zinc import ATP-binding nucleus,mitochondrion,eukaryotic translation initiation factor 3 complex,plasma membrane,cytosolic ribosome,preribosome, large subunit precursor,translation initiation factor activity,transporter activity,iron ion binding,ATP b	3	4	NaN	NaN	NaN	NaN	NaN	NaN	22.4558	23.9408	23.5698	NaN	NaN	NaN	NaN	NaN	NaN	NaN	NaN	NaN	NaN	NaN	23.5796	25.8689	23.0564	23.7336	19	19	37.3	68.962	0	107.13	930170000	27
DERPT_G7938	Full=Ribose-phosphate pyrophosphokinase 2 ame: Full=Phosphoribosyl pyrophosphate synthase II Short=PRS-II ribose phosphate diphosphokinase complex,protein-containing complex,magnesium ion binding,ribose phosphate diphosphokinase activity,kinase binding,enz	3	4	NaN	NaN	NaN	NaN	NaN	NaN	NaN	NaN	NaN	NaN	22.3629	24.2553	26.3736	NaN	NaN	NaN	NaN	NaN	NaN	NaN	24.0425	24.813	23.0042	24.1148	12	12	44.1	41.109	0	106.7	971480000	38
DERPT_G3284	Full=Plastin-3 ame: Full=T-plastin stress fiber,ruffle,phagocytic cup,podosome,extracellular space,cell wall,vacuole,cytosol,actin filament,brush border,focal adhesion,cellular bud tip,filopodium,actin cortical patch,mating projection tip,extracellular exo	3	4	26.5411	23.8785	23.9225	NaN	NaN	NaN	NaN	NaN	NaN	NaN	NaN	NaN	NaN	NaN	NaN	NaN	NaN	NaN	NaN	NaN	23.7359	25.3083	23.0154	25.0401	20	20	48	73.026	0	106.62	1022700000	50
DERPT_G6251	Full=Proto-oncogene tyrosine- kinase ROS ame: Full=Proto-oncogene c-Ros ame: Full=Proto-oncogene c-Ros-1 ame: Full=Receptor tyrosine kinase c-ros oncogene 1 ame: Full=c-Ros receptor tyrosine kinase Flags: Precursor lytic vacuole,nucleus,cell surface,integr	2	4	NaN	NaN	NaN	NaN	NaN	NaN	24.046	NaN	25.8919	NaN	NaN	NaN	NaN	NaN	NaN	NaN	NaN	NaN	NaN	NaN	24.7875	24.6506	25.6151	24.2902	5	5	5	189.38	0	106.59	1358600000	22
DERPT_G942	Full=Histone H4 nuclear chromosome, telomeric region,nuclear nucleosome,nucleoplasm,nucleolus,vacuolar membrane,Golgi apparatus,lipid droplet,cytosol,plasma membrane,plasmodesma,chloroplast,thylakoid,extracellular matrix,protein-containing complex,extracel	18	4	27.9999	25.6202	27.6843	28.5637	30.0308	28.6038	26.4538	23.5893	22.7625	NaN	NaN	25.0623	27.7775	27.0255	25.7637	25.8157	26.6462	27.1067	27.6622	27.3839	27.3878	27.2545	27.4811	26.8164	12	7	58.3	11.367	0	106.45	11686000000	93
DERPT_G6912	Proposed Eur-Allergen, Allergen Homolog (Asp f27, Mal s6, Der f29, Cand. aCYP): Full=Peptidyl-prolyl cis-trans isomerase B Short=PPIase B ame: Full=Rotamase B Flags: Precursor nucleus,endoplasmic reticulum lumen,smooth endoplasmic reticulum,focal adhesion,	0	4	NaN	NaN	NaN	NaN	NaN	NaN	NaN	NaN	NaN	NaN	NaN	NaN	NaN	NaN	NaN	NaN	NaN	NaN	NaN	NaN	25.2609	25.8095	24.4111	25.7356	5	5	38.2	22.549	0	105.22	1376100000	22
DERPT_G3292	Full=Contactin-associated -like 5 ame: Full=Cell recognition molecule Caspr5 Flags: Precursor integral component of plasma membrane,pleated septate junction,main axon,synapse,protein binding,heart process,dorsal closure,synaptic target recognition,axon ens	0	4	NaN	NaN	NaN	NaN	NaN	NaN	NaN	NaN	NaN	NaN	NaN	NaN	NaN	NaN	NaN	NaN	NaN	NaN	NaN	NaN	25.3905	25.4609	23.8719	25.1173	22	22	28	153.75	0	105.06	2560500000	48
DERPT_G11432	Full=Tryptophan 2,3-dioxygenase Short=TDO ame: Full= vermilion ame: Full=Tryptamin 2,3-dioxygenase ame: Full=Tryptophan oxygenase Short=TO Short=TRPO ame: Full=Tryptophan pyrrolase ame: Full=Tryptophanase extracellular region,tryptophan 2,3-dioxygenase act	4	4	NaN	NaN	NaN	23.5589	24.47	27.1714	24.924	NaN	NaN	NaN	NaN	NaN	NaN	NaN	NaN	NaN	NaN	NaN	NaN	NaN	24.7283	23.3868	24.5283	23.7274	14	14	9.2	205.98	0	103.52	1391400000	35
DERPT_G9845	Full=Proline--tRNA ligase ame: Full=Prolyl-tRNA synthetase Short= mitochondrion,cytosol,ribosome,plasmodesma,cytoplasmic stress granule,membrane,aminoacyl-tRNA synthetase multienzyme complex,methionyl glutamyl tRNA synthetase complex,GAIT complex,mRNA bind	6	4	NaN	NaN	NaN	NaN	NaN	NaN	NaN	NaN	24.0367	24.5854	27.809	27.038	26.1931	25.9072	NaN	NaN	NaN	NaN	NaN	NaN	25.767	26.7712	24.0687	26.3891	40	40	38.2	153.47	0	103.36	3702700000	101
DERPT_G4318	Full=Isoleucine--tRNA ligase ame: Full=Isoleucyl-tRNA synthetase Short= nucleoplasm,cytosol,membrane,extracellular exosome,tRNA binding,aminoacyl-tRNA editing activity,isoleucine-tRNA ligase activity,ATP binding,GTPase binding,osteoblast differentiation,is	7	4	21.6864	NaN	24.0212	24.7981	25.6779	27.3299	23.6517	NaN	NaN	22.5979	NaN	NaN	NaN	NaN	NaN	NaN	NaN	NaN	NaN	NaN	25.2327	26.2744	23.3988	26.3646	39	39	43.7	144.89	0	103.32	3029200000	94
DERPT_G8408	Full=Acyl- desaturase ame: Full=Delta(9)-desaturase Short=Delta-9 desaturase ame: Full=Fatty acid desaturase ame: Full=Stearoyl- desaturase extracellular region,integral component of endoplasmic reticulum membrane,hexokinase activity,stearoyl-CoA 9-desatur	2	4	NaN	NaN	NaN	NaN	NaN	NaN	21.7589	23.5814	NaN	NaN	NaN	NaN	NaN	NaN	NaN	NaN	NaN	NaN	NaN	NaN	26.7205	28.0192	22.7489	27.0703	15	15	18	151.53	0	103.18	4254400000	54
DERPT_G6962	Full=AP-2 complex subunit alpha-2 ame: Full=100 kDa coated vesicle C ame: Full=Adaptor complex AP-2 subunit alpha-2 ame: Full=Adaptor-related complex 2 subunit alpha-2 ame: Full=Alpha-adaptin C ame: Full=Alpha2-adaptin ame: Full=Clathrin assembly complex 2	3	4	NaN	NaN	NaN	NaN	NaN	NaN	NaN	NaN	24.6706	26.6454	24.3479	NaN	NaN	NaN	NaN	NaN	NaN	NaN	NaN	NaN	26.0556	26.2073	26.514	25.9719	18	18	33.6	105.82	0	102.38	2904100000	55
DERPT_G5399	Full=Katanin p60 ATPase-containing subunit A1 Short=Katanin p60 subunit A1 ame: Full=p60 katanin ESCRT III complex,spindle pole,nucleus,lysosome,early endosome,multivesicular body,vacuolar membrane,endoplasmic reticulum,centrosome,cytosol,plasma membrane,c	0	4	NaN	NaN	NaN	NaN	NaN	NaN	NaN	NaN	NaN	NaN	NaN	NaN	NaN	NaN	NaN	NaN	NaN	NaN	NaN	NaN	23.272	24.35	23.1779	23.7931	10	9	29.3	49.844	0	101.9	1133700000	25
DERPT_G6866	Full=Failed axon connections homolog cytoplasm,plasma membrane,axonogenesis,sensory perception of pain	0	4	NaN	NaN	NaN	NaN	NaN	NaN	NaN	NaN	NaN	NaN	NaN	NaN	NaN	NaN	NaN	NaN	NaN	NaN	NaN	NaN	25.2635	25.9409	24.8603	25.7443	16	16	50	48.379	0	101.87	1515800000	40
DERPT_G5672	Full=Superoxide dismutase 1 copper chaperone mitochondrion,membrane part,intracellular organelle part,copper ion binding,superoxide metabolic process,response to inorganic substance,metal ion transport,cellular response to oxidative stress,positive regulat	3	4	NaN	NaN	NaN	NaN	NaN	NaN	NaN	NaN	24.3348	26.3849	25.6239	NaN	NaN	NaN	NaN	NaN	NaN	NaN	NaN	NaN	25.2074	25.1035	25.684	24.8778	11	11	51.1	25.501	0	101.77	1481600000	25
DERPT_G9249	---NA---	6	4	NaN	NaN	NaN	NaN	NaN	NaN	22.5738	NaN	NaN	25.0223	25.7315	25.5073	24.2771	25.4603	NaN	NaN	NaN	NaN	NaN	NaN	23.9743	23.6888	24.9746	23.5546	7	7	24.5	42.742	0	101.76	1006000000	28
DERPT_G9649	Full=Filamin-C Short=FLN-C ame: Full=ABP-280 ame: Full=ABP-L ame: Full=Actin-binding ame: Full=Filamin-2 ame: Full=Gamma-filamin nucleus,actin filament,plasma membrane,adherens junction,myofibril,actin filament bundle,female germline ring canal,neuron proj	4	4	NaN	NaN	NaN	NaN	NaN	NaN	NaN	NaN	25.5064	27.3075	26.919	24.5262	NaN	NaN	NaN	NaN	NaN	NaN	NaN	NaN	25.7368	26.446	25.4136	26.3268	11	11	65.1	25.593	0	101.1	3315200000	45
DERPT_G10313	---NA---	17	4	22.9172	NaN	NaN	NaN	21.602	22.8953	23.4959	25.8554	27.9222	30.9475	30.7701	27.8482	26.6006	27.3209	26.8674	26.7763	25.2122	24.8837	24.9261	24.4738	26.0578	24.6436	26.8911	24.6389	10	6	19.5	58.179	0	100.44	15655000000	85
DERPT_G1248	Full=Pancreatic triacylglycerol lipase Short=PL Short=PTL Short=Pancreatic lipase Flags: Precursor lipase activity,carboxylic ester hydrolase activity,lipid digestion,cellular lipid metabolic process,lipid catabolic process	3	4	NaN	NaN	NaN	NaN	NaN	26.4282	27.5416	25.308	NaN	NaN	NaN	NaN	NaN	NaN	NaN	NaN	NaN	NaN	NaN	NaN	25.8593	25.3888	26.2128	25.4742	19	19	13.4	153.3	0	100.28	3056100000	50
DERPT_G5677	Full= kinase C zeta type ame: Full=nPKC-zeta intracellular signal transduction	3	4	NaN	NaN	NaN	NaN	NaN	NaN	NaN	23.3749	24.5612	25.1858	NaN	NaN	NaN	NaN	NaN	NaN	NaN	NaN	NaN	NaN	24.2771	23.9776	24.2251	23.7967	10	10	10.3	157.4	0	100.03	734850000	24
DERPT_G11915	---NA---	0	4	NaN	NaN	NaN	NaN	NaN	NaN	NaN	NaN	NaN	NaN	NaN	NaN	NaN	NaN	NaN	NaN	NaN	NaN	NaN	NaN	23.4486	23.8106	24.1622	23.2638	8	6	27.4	38.041	0	99.942	1488900000	22
DERPT_G5894	Der f profilin like allergen;Allergen Homolog (Tyr p36): Full=Profilin-2 ame: Full=Pollen allergen Ole e 2 ame: Allergen=Ole e 2 cell wall,nucleolus,spindle,cytosol,plasma membrane,plasmodesma,phragmoplast,apoplast,actin polymerization or depolymerization	6	4	NaN	NaN	NaN	NaN	NaN	NaN	NaN	NaN	NaN	25.9481	29.1848	29.7571	29.0018	27.2551	26.4329	NaN	NaN	NaN	NaN	NaN	28.1515	27.867	27.6522	27.4744	8	8	86.2	14.305	0	99.86	11582000000	67
DERPT_G9681	Full=Uncharacterized UDP-glucosyltransferase membrane,cell part,UDP-glycosyltransferase activity,transferase activity, transferring hexosyl groups,carbohydrate metabolic process,steroid metabolic process,cellular metabolic process,biosynthetic process,cell	2	4	NaN	NaN	NaN	NaN	NaN	NaN	NaN	NaN	NaN	NaN	NaN	25.0184	24.5387	NaN	NaN	NaN	NaN	NaN	NaN	NaN	26.1014	27.3776	23.9121	26.5397	16	16	45.3	52.284	0	99.83	3013100000	43
DERPT_G8101	Full=Regulator of microtubule dynamics 3 Short=RMD-3 ame: Full= FAM82A2 ame: Full= FAM82C spindle pole,mitochondrion,microtubule,membrane,protein binding,transferase activity, transferring glycosyl groups,cellular metabolic process,primary metabolic proces	6	4	NaN	NaN	NaN	NaN	NaN	NaN	NaN	NaN	25.6669	26.9634	28.1575	27.6649	24.6773	24.5166	NaN	NaN	NaN	NaN	NaN	NaN	25.9104	24.4616	24.8447	24.818	13	13	19.5	92.791	0	99.646	2940300000	40
DERPT_G1638	Full=Sjoegren syndrome scleroderma autoantigen 1 homolog ame: Full=Autoantigen p27 homolog ame: Full= C184L identical protein binding	3	0	NaN	NaN	NaN	NaN	24.0082	26.9355	26.146	NaN	NaN	NaN	NaN	NaN	NaN	NaN	NaN	NaN	NaN	NaN	NaN	NaN	NaN	NaN	NaN	NaN	3	3	26.1	18.577	0	99.603	980470000	10
DERPT_G5652	Full=Ras-related Rab-5A ruffle,mitochondrial outer membrane,lysosomal membrane,late endosome,endoplasmic reticulum,lipid droplet,cytosol,plasma membrane,synaptic vesicle,actin cytoskeleton,dendrite,phagocytic vesicle membrane,melanosome,zymogen granule mem	6	4	NaN	NaN	NaN	NaN	NaN	NaN	NaN	22.5401	25.2626	27.7464	28.3204	26.7829	24.9036	NaN	NaN	NaN	NaN	NaN	NaN	NaN	24.8283	25.4615	23.4057	24.9601	8	8	49.1	24.196	0	99.552	3083700000	39
DERPT_G1274	Full=UTP--glucose-1-phosphate uridylyltransferase ame: Full=UDP-glucose pyrophosphorylase Short=UDPGP Short=UGPase nucleus,cytosol,plasma membrane,cytoplasmic stress granule,extracellular exosome,pollen tube,UTP:glucose-1-phosphate uridylyltransferase acti	0	4	NaN	NaN	NaN	NaN	NaN	NaN	NaN	NaN	NaN	NaN	NaN	NaN	NaN	NaN	NaN	NaN	NaN	NaN	NaN	NaN	23.9	26.5581	22.3217	24.6983	20	20	54.9	57.214	0	99.513	1162200000	32
DERPT_G1127	Full=Alanine aminotransferase 2 Short=ALT2 ame: Full=Glutamate pyruvate transaminase 2 Short=GPT 2 ame: Full=Glutamic--alanine transaminase 2 ame: Full=Glutamic--pyruvic transaminase 2 extracellular space,nucleus,mitochondrion,peroxisome,cytosol,plant-type	3	4	NaN	NaN	NaN	NaN	NaN	24.8359	27.6951	25.5167	NaN	NaN	NaN	NaN	NaN	NaN	NaN	NaN	NaN	NaN	NaN	NaN	25.8141	26.4382	24.2358	26.2246	21	20	39.1	86.276	0	98.661	3411300000	45
DERPT_G4234	Full=Oxygen-dependent choline dehydrogenase Short=CDH Short=CHD ame: Full=Betaine aldehyde dehydrogenase Short=BADH cell part,oxidoreductase activity, acting on CH-OH group of donors,flavin adenine dinucleotide binding,oxidation-reduction process	4	0	NaN	24.5269	NaN	NaN	24.8658	26.1372	24.0345	NaN	NaN	NaN	NaN	NaN	NaN	NaN	NaN	NaN	NaN	NaN	NaN	NaN	NaN	NaN	NaN	NaN	12	12	30.2	69.352	0	98.656	868450000	20
DERPT_G6223	Full=Bis(5 -nucleosyl)- symmetrical ame: Full=Ap4A hydrolase ame: Full=Diadenosine 5 ,5 -P1,P4-tetraphosphate pyrophosphohydrolase ame: Full=Diadenosine tetraphosphatase intracellular part,peptidase activator activity,hydrolase activity,lysine-acetylated h	2	4	NaN	NaN	NaN	NaN	NaN	NaN	NaN	NaN	25.9732	25.6988	NaN	NaN	NaN	NaN	NaN	NaN	NaN	NaN	NaN	NaN	23.9924	23.7139	24.213	23.97	9	9	5	278.45	0	98.201	1024300000	26
DERPT_G10503	Full=Probable L-aspartate dehydrogenase oxidoreductase activity,NADP binding,NADP catabolic process,pyridine nucleotide biosynthetic process,oxidation-reduction process	5	4	22.0029	NaN	NaN	NaN	NaN	21.5991	23.3902	24.9156	21.4579	NaN	NaN	NaN	NaN	NaN	NaN	NaN	NaN	NaN	NaN	NaN	25.9434	25.9264	26.0974	25.9675	17	17	60.7	37.14	0	97.418	2148400000	55
DERPT_G8071	Full=Ganglioside GM2 activator ame: Full=Cerebroside sulfate activator ame: Full=GM2-AP ame: Full=Sphingolipid activator 3 Short=SAP-3 Flags: Precursor enzyme activator activity,ganglioside catabolic process	12	4	NaN	NaN	NaN	NaN	NaN	NaN	NaN	NaN	23.7979	27.1966	27.7189	24.9576	26.2225	25.9053	25.3469	25.6882	27.4606	26.9503	26.3389	25.8354	26.3192	25.9142	26.1916	25.202	7	7	40.8	23.231	0	96.845	3317000000	39
DERPT_G11313	Full=L-carnitine dehydrogenase Short=CDH Short=L-CDH nucleolus,Golgi apparatus,cytosol,plasma membrane,extracellular exosome,3-hydroxyacyl-CoA dehydrogenase activity,protein homodimerization activity,L-gulonate 3-dehydrogenase activity,NAD+ binding,oxidati	0	4	NaN	NaN	NaN	NaN	NaN	NaN	NaN	NaN	NaN	NaN	NaN	NaN	NaN	NaN	NaN	NaN	NaN	NaN	NaN	NaN	23.8311	23.7133	24.9604	23.6438	32	4	52	54.348	0	96.732	826290000	18
DERPT_G11395	Full=Phenylalanine--tRNA ligase beta subunit ame: Full=Phenylalanyl-tRNA synthetase beta subunit Short= cytosol,phenylalanine-tRNA ligase complex,membrane,magnesium ion binding,aminoacyl-tRNA editing activity,RNA binding,phenylalanine-tRNA ligase activity,	4	3	23.3529	NaN	NaN	NaN	22.3772	23.6695	23.6178	NaN	NaN	NaN	NaN	NaN	NaN	NaN	NaN	NaN	NaN	NaN	NaN	NaN	24.2801	25.7996	NaN	24.9476	13	13	27.7	68.403	0	96.702	1066000000	34
DERPT_G6998	Full=Prohibitin-2 nucleolus,mitochondrial outer membrane,mitochondrial respiratory chain complex I,vacuolar membrane,Golgi apparatus,lipid droplet,microtubule associated complex,plasma membrane,plant-type cell wall,plasmodesma,chloroplast,cell surface,inte	0	4	NaN	NaN	NaN	NaN	NaN	NaN	NaN	NaN	NaN	NaN	NaN	NaN	NaN	NaN	NaN	NaN	NaN	NaN	NaN	NaN	24.2117	25.5356	23.0027	24.994	8	8	38.1	32.118	0	96.653	840430000	29
DERPT_G8175	Full=60S ribosomal L5 nucleolus,focal adhesion,membrane,aminoacyl-tRNA synthetase multienzyme complex,cytosolic large ribosomal subunit,extracellular exosome,mRNA binding,structural constituent of ribosome,protein binding,5S rRNA binding,reproduction,ribos	8	4	24.1368	NaN	NaN	NaN	NaN	NaN	NaN	NaN	NaN	NaN	23.5066	26.2605	26.8359	26.3989	25.145	25.0352	23.8946	NaN	NaN	NaN	25.6189	26.723	24.6553	26.5159	14	14	41.3	34.723	0	96.313	2810400000	81
DERPT_G4231	Full=Acidic leucine-rich nuclear phospho 32 family member A Swr1 complex,nucleoplasm,nucleolus,endoplasmic reticulum,microtubule associated complex,cytoplasmic vesicle,perinuclear region of cytoplasm,extracellular exosome,microtubule binding,phosphatase in	0	4	NaN	NaN	NaN	NaN	NaN	NaN	NaN	NaN	NaN	NaN	NaN	NaN	NaN	NaN	NaN	NaN	NaN	NaN	NaN	NaN	25.4672	24.367	23.9659	24.8977	8	8	35.7	32.452	0	95.771	853470000	22
DERPT_G821	Full=Aspartate--tRNA(Asp Asn) ligase ame: Full=Aspartyl-tRNA synthetase Short= ame: Full=Non-discriminating aspartyl-tRNA synthetase Short=ND- mitochondrion,integral component of membrane,peroxidase activity,aminoacyl-tRNA ligase activity,ATP binding,heme	0	4	NaN	NaN	NaN	NaN	NaN	NaN	NaN	NaN	NaN	NaN	NaN	NaN	NaN	NaN	NaN	NaN	NaN	NaN	NaN	NaN	23.6078	22.8855	23.2826	23.7461	13	13	10.7	260.09	0	95.653	512280000	25
DERPT_G7610	Full=V-type proton ATPase subunit C 1 Short=V-ATPase subunit C 1 ame: Full=Vacuolar proton pump subunit C 1 vacuolar proton-transporting V-type ATPase, V1 domain,lysosomal membrane,cytoplasmic vesicle,plasma membrane proton-transporting V-type ATPase compl	0	4	NaN	NaN	NaN	NaN	NaN	NaN	NaN	NaN	NaN	NaN	NaN	NaN	NaN	NaN	NaN	NaN	NaN	NaN	NaN	NaN	23.5378	24.0973	23.6112	23.545	11	11	9.4	190.45	0	95.581	416830000	15
DERPT_G4364	Full=pH-response regulator palA RIM20 immunological synapse,microtubule organizing center,cytosol,focal adhesion,cytoplasmic vesicle,cell projection,myelin sheath,extracellular exosome,endoplasmic reticulum exit site,phosphatase activity,proteinase activat	10	4	23.9116	NaN	NaN	NaN	NaN	23.8678	23.5159	24.9457	27.0244	25.4386	27.004	25.531	24.3537	25.46	NaN	NaN	NaN	NaN	NaN	NaN	26.0827	26.7895	25.086	26.9858	33	33	41.6	91.96	0	95.481	4060400000	97
DERPT_G9905	Full=Propionyl- carboxylase alpha mitochondrial Short=PCCase subunit alpha ame: Full=Propanoyl- :carbon dioxide ligase subunit alpha Flags: Precursor mitochondrial inner membrane,apical part of cell,biotin carboxylase activity,propionyl-CoA carboxylase act	1	4	NaN	NaN	NaN	NaN	NaN	NaN	NaN	NaN	NaN	NaN	NaN	NaN	24.1938	NaN	NaN	NaN	NaN	NaN	NaN	NaN	24.2362	26.3655	22.6159	24.2415	17	17	6.2	466.74	0	95.382	1092800000	34
DERPT_G7389	Full=IDLSRF-like peptide Flags: Precursor protein binding	3	0	NaN	NaN	NaN	NaN	NaN	NaN	NaN	NaN	NaN	26.017	24.8372	23.189	NaN	NaN	NaN	NaN	NaN	NaN	NaN	NaN	NaN	NaN	NaN	NaN	4	4	31.3	30.66	0	95.355	398910000	14
DERPT_G1475	Full=Carboxypeptidase A1 Flags: Precursor metallocarboxypeptidase activity,zinc ion binding,proteolysis	0	4	NaN	NaN	NaN	NaN	NaN	NaN	NaN	NaN	NaN	NaN	NaN	NaN	NaN	NaN	NaN	NaN	NaN	NaN	NaN	NaN	26.6632	26.1292	26.9435	26.3481	14	14	40.4	50.092	0	95.29	3256000000	46
DERPT_G1615	Full=Phosphorylase b kinase regulatory subunit skeletal muscle isoform Short=Phosphorylase kinase alpha M subunit endoplasmic reticulum,cytosol,calcineurin complex,synaptic vesicle,sarcomere,sarcolemma,striated muscle dense body,calcium-dependent protein s	5	0	NaN	NaN	NaN	NaN	22.8475	23.4299	24.583	NaN	23.4215	23.2441	NaN	NaN	NaN	NaN	NaN	NaN	NaN	NaN	NaN	NaN	NaN	NaN	NaN	NaN	6	6	6.2	161.71	0	95.161	393650000	13
DERPT_G3218	Full=tRNA selenocysteine 1-associated 1 ame: Full=SECp43 ame: Full=tRNA selenocysteine-associated 1 nucleus,cytosol,cytoplasmic stress granule,mRNA binding,protein binding,selenocysteine incorporation,response to cytokinin	7	4	NaN	NaN	NaN	NaN	NaN	NaN	NaN	NaN	NaN	24.4376	27.9304	26.6051	24.3367	23.8738	23.9446	24.3406	NaN	NaN	NaN	NaN	24.0383	23.8331	24.2372	24.2162	5	5	24.5	30.387	0	95.137	1763400000	30
DERPT_G3519	Full=Acyl- synthetase family member mitochondrial Flags: Precursor CoA-ligase activity,acid-thiol ligase activity,lipid metabolic process	0	4	NaN	NaN	NaN	NaN	NaN	NaN	NaN	NaN	NaN	NaN	NaN	NaN	NaN	NaN	NaN	NaN	NaN	NaN	NaN	NaN	24.7977	25.1945	19.5754	24.9995	16	15	18.4	136.72	0	94.95	775660000	37
DERPT_G8155	Full=Neurofascin Flags: Precursor intracellular,pleated septate junction,lateral plasma membrane,filopodium,cytoneme,main axon,synapse,calcium ion binding,protein binding,neuron cell-cell adhesion,epidermal growth factor receptor signaling pathway,imaginal	9	4	NaN	NaN	NaN	25.1071	26.5767	25.9135	25.8177	25.4282	25.4022	NaN	NaN	23.1741	23.9318	25.1758	NaN	NaN	NaN	NaN	NaN	NaN	25.4026	26.3718	24.9952	25.6912	29	29	31.1	142.81	0	94.843	3414400000	68
DERPT_G5808	Full=Prolyl endopeptidase Short=PE ame: Full=Post-proline cleaving enzyme nucleus,cytoplasm,serine-type endopeptidase activity,serine-type exopeptidase activity,proteolysis	6	4	27.3312	26.8192	28.343	25.21	NaN	NaN	22.2551	22.5736	NaN	NaN	NaN	NaN	NaN	NaN	NaN	NaN	NaN	NaN	NaN	NaN	25.0799	24.3891	23.4648	24.5153	26	26	42.8	82.059	0	94.773	2235000000	70
DERPT_G10257	Full=GTP cyclohydrolase 1 type 2 homolog mitochondrion,protein binding,regulation of nucleic acid-templated transcription	5	4	NaN	NaN	25.5563	26.06	27.0044	25.8718	21.9345	NaN	NaN	NaN	NaN	NaN	NaN	NaN	NaN	NaN	NaN	NaN	NaN	NaN	24.6055	24.0948	24.7705	24.4348	14	14	55.4	38.106	0	94.611	1935000000	50
DERPT_G7984	Full=Endothelin-converting enzyme 1 Short=ECE-1 extracellular space,endoplasmic reticulum,Golgi apparatus,synaptic vesicle,external side of plasma membrane,integral component of membrane,axon,dendrite,neuron projection terminus,perinuclear region of cytopl	3	0	NaN	NaN	NaN	NaN	NaN	23.097	25.9797	23.8116	NaN	NaN	NaN	NaN	NaN	NaN	NaN	NaN	NaN	NaN	NaN	NaN	NaN	NaN	NaN	NaN	14	14	21.2	105.47	0	94.595	912570000	24
DERPT_G11982	Full=DNA-directed RNA polymerases and III subunit RPABC3 Short=RNA polymerases and III subunit ABC3 ame: Full=DNA-directed RNA polymerase II subunit H ame: Full=DNA-directed RNA polymerases and III kDa polypeptide ame: Full=RPB17 ame: Full=RPB8 homolog Sho	2	4	NaN	NaN	NaN	NaN	NaN	NaN	NaN	NaN	NaN	25.2052	24.9614	NaN	NaN	NaN	NaN	NaN	NaN	NaN	NaN	NaN	24.3806	24.6357	24.1802	23.8217	10	10	86.6	17.348	0	93.92	744020000	24
DERPT_G8325	Allergen Homolog (Bla g8, Lit v3): Full=Myosin regulatory light chain ventricular cardiac muscle isoform Short=MLC-2 Short=MLC-2v ame: Full=Myosin light chain slow skeletal ventricular muscle isoform Short=MLC-2s v stress fiber,mitochondrion,cytosol,brush	9	4	26.8867	NaN	23.6443	NaN	NaN	NaN	NaN	NaN	NaN	NaN	25.5995	26.1242	27.1872	26.2844	25.4786	25.8481	25.7165	NaN	NaN	NaN	25.9748	27.0722	26.1688	26.1692	15	14	73.7	22.32	0	93.371	3882200000	53
DERPT_G511	peritrophin 3 extracellular region,chitin binding,chitin metabolic process	9	4	NaN	NaN	NaN	NaN	NaN	NaN	NaN	22.286	24.5867	27.394	27.8344	25.7157	26.2908	23.7462	22.9955	23.9477	NaN	NaN	NaN	NaN	25.8203	24.5669	27.0407	25.3627	11	11	37.4	29.066	0	93.25	4408900000	50
DERPT_G3219	Full=Macrophage mannose receptor 1 Short=MMR ame: CD_antigen=CD206 Flags: Precursor	4	4	NaN	NaN	NaN	NaN	NaN	NaN	NaN	NaN	23.6212	25.3071	25.0703	23.1509	NaN	NaN	NaN	NaN	NaN	NaN	NaN	NaN	23.7748	23.8183	24.1916	23.0723	9	9	19.7	54.572	0	92.999	776370000	29
DERPT_G2496	Allergen Homolog (Der f EF): Full=Elongation factor 2 Short=EF-2 nucleus,lipid droplet,cytosol,microtubule associated complex,plasma membrane,cell-cell adherens junction,aggresome,extracellular matrix,polysomal ribosome,membrane raft,extracellular exosome,	2	4	NaN	NaN	NaN	NaN	NaN	NaN	NaN	NaN	24.4698	25.8534	NaN	NaN	NaN	NaN	NaN	NaN	NaN	NaN	NaN	NaN	23.8035	23.4331	23.974	23.6349	13	11	27.7	92.071	0	92.838	821960000	24
DERPT_G10261	Full=Mitochondrial import inner membrane translocase subunit tim16 ame: Full=Presequence translocated-associated motor subunit pam16 TIM23 mitochondrial import inner membrane translocase complex,hydrolase activity,reproduction,embryonic development via the	1	0	NaN	NaN	NaN	NaN	NaN	NaN	NaN	NaN	NaN	NaN	NaN	NaN	25.0693	NaN	NaN	NaN	NaN	NaN	NaN	NaN	NaN	NaN	NaN	NaN	2	2	6.3	50.348	0	92.429	262890000	4
DERPT_G9183	Full=Hydroxyacid oxidase 1 Short=HAOX1 ame: Full=Glycolate oxidase Short=GOX nucleus,mitochondrion,vacuole,peroxisome,plasmodesma,chloroplast stroma,membrane,cytosolic ribosome,apoplast,signaling receptor binding,glycolate oxidase activity,FMN binding,fatt	0	3	NaN	NaN	NaN	NaN	NaN	NaN	NaN	NaN	NaN	NaN	NaN	NaN	NaN	NaN	NaN	NaN	NaN	NaN	NaN	NaN	24.9383	24.7759	NaN	24.4191	9	9	40.6	44.021	0	92.39	813400000	25
DERPT_G10946	Full=Succinate-- ligase nucleus,microtubule organizing center,plasma membrane,succinate-CoA ligase complex (GDP-forming),succinate-CoA ligase (GDP-forming) activity,succinate-semialdehyde dehydrogenase (NAD+) activity,copper ion binding,ATP binding,GDP bin	5	4	23.4382	NaN	NaN	NaN	NaN	NaN	NaN	NaN	23.5308	23.8709	NaN	25.083	24.7107	NaN	NaN	NaN	NaN	NaN	NaN	NaN	25.0388	26.4472	23.5992	25.2664	18	18	51.1	47.917	0	92.059	1567600000	47
DERPT_G7579	Full=Mitogen-activated kinase 12 Short=MAP kinase 12 Short=MAPK 12 ame: Full=Extracellular signal-regulated kinase 6 Short=ERK-6 ame: Full=Mitogen-activated kinase p38 gamma Short=MAP kinase p38 gamma ame: Full=Stress-activated kinase 3 spindle pole,nucleo	0	4	NaN	NaN	NaN	NaN	NaN	NaN	NaN	NaN	NaN	NaN	NaN	NaN	NaN	NaN	NaN	NaN	NaN	NaN	NaN	NaN	23.939	25.4548	22.7037	24.5428	11	11	39.2	40.917	0	92.017	760230000	26
DERPT_G5266	Full=cAMP-dependent kinase type I-alpha regulatory subunit Contains: ame: Full=cAMP-dependent kinase type I-alpha regulatory N-terminally processed immunological synapse,cytosol,cAMP-dependent protein kinase complex,nucleotide-activated protein kinase comp	10	4	23.5913	NaN	NaN	NaN	NaN	NaN	23.7569	25.7972	28.5674	27.6304	25.7598	25.9501	26.6171	24.792	24.0713	NaN	NaN	NaN	NaN	NaN	27.5777	27.9758	25.8728	27.7279	20	20	44.8	43.843	0	91.776	8500700000	98
DERPT_G5028	Full=Cytochrome b5 mitochondrial inner membrane,vacuolar membrane,endoplasmic reticulum,lipid droplet,plasma membrane,chloroplast thylakoid membrane,integral component of membrane,stearoyl-CoA 9-desaturase activity,protein binding,instar larval development	11	4	21.8986	NaN	22.6584	22.9601	23.016	NaN	NaN	NaN	26.9978	29.6133	28.5917	27.3296	23.9449	23.8332	NaN	NaN	24.4197	NaN	NaN	NaN	26.1274	24.1881	27.1861	25.0138	5	5	10.9	67.327	0	91.725	7451500000	62
DERPT_G8788	Full=Sterol 3-beta-glucosyltransferase ame: Full=Autophagy-related 26 membrane-bounded organelle,intracellular part,transferase activity, transferring hexosyl groups,steroid metabolic process,antibiotic metabolic process	0	4	NaN	NaN	NaN	NaN	NaN	NaN	NaN	NaN	NaN	NaN	NaN	NaN	NaN	NaN	NaN	NaN	NaN	NaN	NaN	NaN	25.1573	26.8808	24.2027	26.2784	11	11	40.7	50.188	0	91.613	2009500000	26
DERPT_G103	Full=60S acidic ribosomal P0 ame: Full=60S ribosomal L10E nucleolus,Golgi apparatus,plasma membrane,focal adhesion,plasmodesma,chloroplast,cytosolic large ribosomal subunit,dendrite,90S preribosome,preribosome, large subunit precursor,cytoplasmic ribonucle	8	4	27.2608	24.7964	NaN	24.3588	NaN	NaN	NaN	NaN	NaN	NaN	25.7747	26.4701	29.1786	28.0399	27.0323	NaN	NaN	NaN	NaN	NaN	27.0904	27.9559	26.0446	27.227	12	12	40.6	34.814	0	91.532	6191700000	47
DERPT_G7614	Full=Serine--tRNA cytoplasmic ame: Full=Seryl-tRNA synthetase Short= ame: Full=Seryl-tRNA(Ser Sec) synthetase mitochondrion,cytosol,cytoplasmic stress granule,extracellular exosome,serine-tRNA ligase activity,ATP binding,negative regulation of transcriptio	4	4	NaN	NaN	NaN	NaN	NaN	NaN	NaN	NaN	NaN	NaN	22.5371	26.3546	27.2748	24.2914	NaN	NaN	NaN	NaN	NaN	NaN	24.6112	25.1049	24.306	23.9271	12	12	36.5	55.35	0	91.51	982080000	35
DERPT_G8256	Full=Cytosolic purine 5 -nucleotidase ame: Full=Cytosolic 5 -nucleotidase II mitochondrion,cytosol,receptor complex,binding,hydrolase activity,phosphate-containing compound metabolic process,nucleobase-containing small molecule metabolic process	5	4	NaN	NaN	NaN	NaN	24.9237	26.712	21.3427	NaN	NaN	NaN	NaN	NaN	22.1345	20.5985	NaN	NaN	NaN	NaN	NaN	NaN	23.4581	22.9857	22.3042	23.627	17	17	34.8	69.67	0	91.42	1051000000	40
DERPT_G3003	Full=Hydroxyacylglutathione hydrolase ame: Full=Glyoxalase II Short=Glx II nucleoplasm,mitochondrion,cytosol,hydroxyacylglutathione hydrolase activity,iron ion binding,glutathione thiolesterase activity,sulfur dioxygenase activity,glutathione metabolic pro	9	4	23.7042	NaN	NaN	NaN	NaN	24.3505	23.154	23.838	26.0006	27.4319	25.3689	26.5172	24.4999	NaN	NaN	NaN	NaN	NaN	NaN	NaN	25.1515	25.745	25.6497	25.5331	15	15	70.8	26.434	0	91.275	3245000000	51
DERPT_G11837	---NA---	5	4	NaN	NaN	NaN	22.376	NaN	24.1376	25.4952	23.7097	22.8893	NaN	NaN	NaN	NaN	NaN	NaN	NaN	NaN	NaN	NaN	NaN	25.5549	25.1704	23.1922	25.3485	16	16	26.2	82.59	0	90.908	1486900000	43
DERPT_G3781	Full=ATP-dependent (S)-NAD(P)H-hydrate dehydratase ame: Full=ATP-dependent NAD(P)HX dehydratase mitochondrion,endoplasmic reticulum,cytosol,chloroplast,ATP-dependent NAD(P)H-hydrate dehydratase activity,ADP-dependent NAD(P)H-hydrate dehydratase activity,NA	5	4	NaN	NaN	NaN	23.7741	24.5211	26.5558	25.0753	23.2545	NaN	NaN	NaN	NaN	NaN	NaN	NaN	NaN	NaN	NaN	NaN	NaN	25.8958	25.3879	26.5084	25.5383	15	15	59.9	38.761	0	90.555	2604500000	56
DERPT_G8886	Full=Golgi-associated plant pathogenesis-related 1 Short=GAPR-1 Short=Golgi-associated PR-1 ame: Full=Glioma pathogenesis-related 2 Short= 2 extracellular region,endomembrane system,intracellular membrane-bounded organelle,cytoplasmic part,intracellular or	5	4	23.7781	NaN	NaN	NaN	NaN	NaN	NaN	NaN	26.066	25.7737	24.0273	24.8943	NaN	NaN	NaN	NaN	NaN	NaN	NaN	NaN	22.6564	21.9774	23.4499	24.3178	12	12	16.2	111.46	0	90.241	1016800000	29
DERPT_G8693	Full=Actin-related 3 ame: Full=Actin 3 Golgi membrane,podosome,actin filament,Arp2/3 protein complex,brush border,cell-cell junction,focal adhesion,cell surface,integral component of membrane,lamellipodium,hemidesmosome,cytoplasmic vesicle,tubulobulbar com	0	4	NaN	NaN	NaN	NaN	NaN	NaN	NaN	NaN	NaN	NaN	NaN	NaN	NaN	NaN	NaN	NaN	NaN	NaN	NaN	NaN	24.8567	25.0756	24.7997	24.8543	14	14	4.4	660.65	0	90.232	1134100000	44
DERPT_G4287	Full= MEMO1 ame: Full=Mediator of 2-driven cell motility 1 Short=Memo-1 nucleus,cytosol,peptide binding,regulation of microtubule-based process	2	4	NaN	NaN	NaN	NaN	NaN	NaN	NaN	NaN	NaN	24.5188	NaN	23.3275	NaN	NaN	NaN	NaN	NaN	NaN	NaN	NaN	25.7358	25.7014	21.8475	26.0308	10	10	64.5	34.213	0	90.196	1451800000	40
DERPT_G3268	Full=RNA polymerase II-associated 3 nuclear envelope,cytosol,plasmodesma,integral component of endoplasmic reticulum membrane,phosphoprotein phosphatase activity,protein C-terminus binding,Hsp70 protein binding,tetrapyrrole binding,chaperone binding,BAT3 c	7	4	NaN	NaN	NaN	NaN	NaN	22.2523	24.0568	25.8377	25.9932	23.9885	NaN	25.7272	23.5896	NaN	NaN	NaN	NaN	NaN	NaN	NaN	24.8306	24.5083	23.4067	25.6361	11	11	43.4	36.172	0	90.156	1863300000	45
DERPT_G6117	Full=Probable phospholipase A1 magnifin Flags: Precursor lipase activity,carboxylic ester hydrolase activity,regulation of biological process,lipid catabolic process	0	3	NaN	NaN	NaN	NaN	NaN	NaN	NaN	NaN	NaN	NaN	NaN	NaN	NaN	NaN	NaN	NaN	NaN	NaN	NaN	NaN	24.4828	25.1817	NaN	25.0968	10	10	13.5	138.88	0	90.114	772410000	24
DERPT_G3468	Full=Synaptotagmin-1 ame: Full=Synaptotagmin I Short= ame: Full=p65 Golgi apparatus,cell junction,clathrin-coated vesicle,integral component of synaptic vesicle membrane,dense core granule,SNARE complex,neuromuscular junction,chromaffin granule membrane,pr	7	4	NaN	NaN	NaN	NaN	NaN	NaN	NaN	24.2507	25.2775	25.4029	NaN	24.7764	25.1785	25.5157	25.2393	NaN	NaN	NaN	NaN	NaN	24.886	24.9167	24.6477	24.4981	14	14	32.8	56.723	0	89.711	1598200000	40
DERPT_G3148	LEA homology: Full=GDP-mannose 4,6-dehydratase ame: Full=GDP-D-mannose dehydratase endoplasmic reticulum,Golgi apparatus,cytosol,sarcomere,striated muscle dense body,extracellular exosome,protein binding,GDP-mannose 4,6-dehydratase activity,NADP+ binding,N	0	4	NaN	NaN	NaN	NaN	NaN	NaN	NaN	NaN	NaN	NaN	NaN	NaN	NaN	NaN	NaN	NaN	NaN	NaN	NaN	NaN	23.8805	23.5134	23.8097	23.4925	9	9	38	44.549	0	89.709	528210000	21
DERPT_G1249	Full=Acetyl-coenzyme A synthetase Short= oA synthetase Short=Acs ame: Full=Acetate-- ligase ame: Full=Acyl-activating enzyme cytosol,chloroplast stroma,acetate-CoA ligase activity,protein binding,AMP binding,carboxylic ester hydrolase activity,fatty acid m	0	4	NaN	NaN	NaN	NaN	NaN	NaN	NaN	NaN	NaN	NaN	NaN	NaN	NaN	NaN	NaN	NaN	NaN	NaN	NaN	NaN	26.7166	26.6438	25.4653	26.6775	16	15	21.2	136.58	0	89.487	2761500000	54
DERPT_G9205	Full=Cystatin Flags: Precursor cysteine-type endopeptidase inhibitor activity	6	4	NaN	NaN	NaN	NaN	NaN	23.9886	24.9297	27.9911	27.6337	27.3784	25.7625	NaN	NaN	NaN	NaN	NaN	NaN	NaN	NaN	NaN	25.6598	25.3315	26.233	24.7031	7	7	16.9	39.75	0	88.914	4481100000	30
DERPT_G9174	Full=Papilin Flags: Precursor basement membrane,metalloendopeptidase activity,extracellular matrix structural constituent,zinc ion binding,extracellular matrix organization	16	4	23.767	NaN	21.8524	22.1363	22.3222	NaN	NaN	22.5789	24.933	27.005	27.918	28.6234	30.4472	28.1692	26.547	25.7435	25.5056	24.9591	25.2096	NaN	22.9443	23.5615	24.3356	23.4618	7	5	3.5	143.7	0	88.485	4979300000	58
DERPT_G508	Full=Acetyl- mitochondrial ame: Full=Acetoacetyl- thiolase Flags: Precursor nucleus,mitochondrial inner membrane,mitochondrial matrix,peroxisome,cytosol,plasma membrane,extracellular exosome,acetyl-CoA C-acetyltransferase activity,carbon-carbon lyase activ	3	3	NaN	NaN	NaN	NaN	23.7545	25.2772	23.0237	NaN	NaN	NaN	NaN	NaN	NaN	NaN	NaN	NaN	NaN	NaN	NaN	NaN	24.4249	24.671	NaN	24.1613	8	8	30	44.833	0	88.454	878390000	32
DERPT_G5737	Full=Deoxyuridine 5 -triphosphate nucleotidohydrolase Short=dUTPase ame: Full=dUTP pyrophosphatase nucleus,cytosol,magnesium ion binding,dUTP diphosphatase activity,dITP diphosphatase activity,identical protein binding,dUMP biosynthetic process,DNA repair,	5	4	NaN	NaN	NaN	NaN	NaN	NaN	23.2974	25.5621	27.8741	26.3689	24.2371	NaN	NaN	NaN	NaN	NaN	NaN	NaN	NaN	NaN	25.6789	25.2807	25.8644	25.8097	6	6	57.6	16.989	0	88.221	3123500000	33
DERPT_G723	trk-fused b [Xenopus laevis] Tfg protein binding	8	4	NaN	NaN	NaN	22.9391	22.8616	NaN	23.0041	NaN	22.4989	24.4364	25.5624	25.4692	25.1031	NaN	NaN	NaN	NaN	NaN	NaN	NaN	24.1002	24.448	23.6016	23.977	6	6	13.3	58.652	0	87.99	897960000	25
DERPT_G7263	Der f33 like allergen;Allergen Homolog (Tyr p33, Lep d)Full=Tubulin alpha-1 chain astral microtubule,nucleus,lipid droplet,centrosome,ciliary basal body,cytoplasmic ribonucleoprotein granule,myelin sheath,perinuclear region of cytoplasm,recycling endosom	1	3	23.6574	NaN	NaN	NaN	NaN	NaN	NaN	NaN	NaN	NaN	NaN	NaN	NaN	NaN	NaN	NaN	NaN	NaN	NaN	NaN	24.1562	25.3813	NaN	24.7603	10	8	38.3	51.432	0	87.829	756720000	21
DERPT_G4321	Full=Proteasome-activating nucleotidase Short=PAN ame: Full=Proteasomal ATPase ame: Full=Proteasome regulatory ATPase ame: Full=Proteasome regulatory particle cell wall,nucleolus,plasma membrane,proteasome regulatory particle, base subcomplex,plasmodesma,i	5	4	NaN	NaN	25.3432	27.8905	26.9916	26.3572	23.6295	NaN	NaN	NaN	NaN	NaN	NaN	NaN	NaN	NaN	NaN	NaN	NaN	NaN	24.3651	24.9569	23.5777	24.5545	8	8	28.9	44.343	0	87.405	2691200000	33
DERPT_G7456	Full=L-rhamnonate dehydratase Short= magnesium ion binding,galactarate dehydratase activity,L-fuconate dehydratase activity,L-altrarate dehydratase activity,cellular carbohydrate catabolic process,galactarate catabolic process,L-altrarate catabolic process	0	4	NaN	NaN	NaN	NaN	NaN	NaN	NaN	NaN	NaN	NaN	NaN	NaN	NaN	NaN	NaN	NaN	NaN	NaN	NaN	NaN	25.9018	25.7593	25.2225	25.5902	18	18	61.7	50.697	0	87.278	1588000000	53
DERPT_G8416	Full=E3 ubiquitin ligase complex SCF subunit sconC ame: Full=Sulfur controller C ame: Full=Sulfur metabolite repression control C kinetochore,centrosome,spindle,cytosol,phragmoplast,SCF ubiquitin ligase complex,Cul7-RING ubiquitin ligase complex,CBF3 compl	3	4	NaN	NaN	NaN	NaN	NaN	NaN	NaN	NaN	25.476	24.5226	22.0293	NaN	NaN	NaN	NaN	NaN	NaN	NaN	NaN	NaN	24.5273	23.5772	24.3314	23.6085	8	8	9.2	108.1	0	87.107	730170000	21
DERPT_G1534	Full=Acid sugar phosphatase intracellular part,extracellular exosome,magnesium ion binding,inorganic diphosphatase activity,protein histidine phosphatase activity,enzyme binding,protein dephosphorylation,oxidative phosphorylation	3	4	NaN	NaN	NaN	NaN	NaN	NaN	23.8668	26.9755	26.0687	NaN	NaN	NaN	NaN	NaN	NaN	NaN	NaN	NaN	NaN	NaN	25.1219	24.4259	25.4001	24.676	8	8	50	29.788	0	86.994	2020600000	27
DERPT_G3586	Full=ATP-binding cassette sub-family F member 3 nucleus,mitochondrion,microtubule associated complex,plasma membrane,cell-cell adherens junction,cytosolic ribosome,preribosome, large subunit precursor,chorion,peroxidase activity,ATP binding,heme binding,AT	4	4	NaN	NaN	NaN	NaN	NaN	NaN	22.7072	25.2887	25.5507	23.3827	NaN	NaN	NaN	NaN	NaN	NaN	NaN	NaN	NaN	NaN	23.5322	23.3982	24.1126	23.2384	9	9	11	169.87	0	86.838	902150000	28
DERPT_G5753	Full=Ubiquitin carboxyl-terminal hydrolase 2 ame: Full=41 kDa ubiquitin-specific protease ame: Full=Deubiquitinating enzyme 2 ame: Full=Ubiquitin thioesterase 2 ame: Full=Ubiquitin-specific-processing protease 2 acrosomal vesicle,nucleus,cytosol,glucosidas	4	4	NaN	NaN	NaN	NaN	NaN	NaN	NaN	NaN	NaN	26.4932	28.1144	27.3948	25.9508	NaN	NaN	NaN	NaN	NaN	NaN	NaN	25.6339	25.2346	26.1715	25.5975	9	9	8.1	167.73	0	86.673	3128100000	38
DERPT_G8909	Full= nap homolog 2 Short= nap2 ame: Full=Glioblastoma-amplified sequence mitochondrial inner membrane,integral component of plasma membrane,synaptic membrane,protein binding,neurotransmitter binding,oxidative phosphorylation,ATP biosynthetic process,senso	12	4	24.471	NaN	23.9022	24.7833	25.4596	25.2012	25.3517	25.0852	24.5147	25.2602	NaN	24.9378	25.4712	NaN	NaN	26.6803	NaN	NaN	NaN	NaN	24.9463	25.303	24.077	24.4679	8	8	48.9	32.528	0	86.665	2588400000	45
DERPT_G3132	Full=Ras-related Rab-2A Golgi membrane,nucleus,lysosomal membrane,early endosome,late endosome,endoplasmic reticulum membrane,rough endoplasmic reticulum,Golgi stack,cytosol,chloroplast,apical plasma membrane,trans-Golgi network transport vesicle,cytoplasm	3	0	NaN	NaN	NaN	NaN	NaN	NaN	NaN	NaN	22.3991	23.4887	24.5206	NaN	NaN	NaN	NaN	NaN	NaN	NaN	NaN	NaN	NaN	NaN	NaN	NaN	7	7	38.2	23.671	0	86.273	501090000	10
DERPT_G8653	Full=UBX domain-containing 7 nucleus,cytoplasm,protein binding,proteasome-mediated ubiquitin-dependent protein catabolic process	4	4	NaN	NaN	NaN	NaN	NaN	NaN	NaN	NaN	NaN	23.8325	25.6706	25.7937	25.2715	NaN	NaN	NaN	NaN	NaN	NaN	NaN	23.6231	23.3247	24.7978	23.8375	10	10	31.8	48.866	0	86.155	925400000	33
DERPT_G4895	Allergen Homolog (Der f30): Full=Ferritin heavy chain Short=Ferritin H subunit Contains: ame: Full=Ferritin heavy N-terminally processed intracellular membrane-bounded organelle,cytoplasmic part,ferric iron binding,oxidoreductase activity,iron ion transpor	3	0	NaN	NaN	26.5483	27.4103	25.038	NaN	NaN	NaN	NaN	NaN	NaN	NaN	NaN	NaN	NaN	NaN	NaN	NaN	NaN	NaN	NaN	NaN	NaN	NaN	6	6	33.3	19.965	0	86.143	1154500000	17
DERPT_G10673	Full=Probable E3 ubiquitin- ligase HERC4 ame: Full=HECT domain and RCC1-like domain-containing 4 ame: Full=HECT-type E3 ubiquitin transferase HERC4 cytoskeleton,intracellular membrane-bounded organelle,ciliary part,cytoplasmic part,intracellular organelle	0	3	NaN	NaN	NaN	NaN	NaN	NaN	NaN	NaN	NaN	NaN	NaN	NaN	NaN	NaN	NaN	NaN	NaN	NaN	NaN	NaN	24.7433	24.9487	NaN	24.8688	10	9	9.1	226.67	0	85.745	783130000	22
DERPT_G10318	Full=Angiotensin-converting enzyme Short=ACE ame: Full=Dipeptidyl carboxypeptidase I ame: Full=Kininase II ame: CD_antigen=CD143 Contains: ame: Full=Angiotensin-converting soluble form Flags: Precursor extracellular space,basal plasma membrane,cell surface	5	4	NaN	NaN	NaN	NaN	24.1769	25.6277	27.877	26.6816	24.025	NaN	NaN	NaN	NaN	NaN	NaN	NaN	NaN	NaN	NaN	NaN	25.6356	25.5991	24.2203	26.2633	27	27	42.4	80.632	0	85.731	3847900000	78
DERPT_G1592	Full=Sarcalumenin Flags: Precursor endoplasmic reticulum,lipid droplet,cytosol,caveola,cell-cell adherens junction,focal adhesion,plasmodesma,extrinsic component of membrane,ciliary pocket membrane,AP-2 adaptor complex,platelet dense tubular network membra	0	3	NaN	NaN	NaN	NaN	NaN	NaN	NaN	NaN	NaN	NaN	NaN	NaN	NaN	NaN	NaN	NaN	NaN	NaN	NaN	NaN	23.7824	24.8889	NaN	24.0366	20	20	38.1	64.039	0	85.32	1592000000	41
DERPT_G7887	Full=Thioredoxin Short=Trx nucleolus,mitochondrion,dendrite,neuronal cell body,peptide-methionine (S)-S-oxide reductase activity,protein disulfide oxidoreductase activity,protein-containing complex binding,peptide-methionine (R)-S-oxide reductase activity,	7	3	NaN	NaN	NaN	NaN	NaN	NaN	NaN	NaN	21.7135	24.7979	30.0285	28.5899	25.7227	24.9622	23.8569	NaN	NaN	NaN	NaN	NaN	23.6515	22.8674	23.0867	NaN	12	12	60.7	17.097	0	84.977	4255800000	46
DERPT_G5254	Full=Isopentenyl-diphosphate Delta-isomerase 1 ame: Full=Isopentenyl pyrophosphate isomerase 1 Short=IPP isomerase 1 Short=IPPI1 nucleus,mitochondrion,peroxisome,cytosol,chloroplast,magnesium ion binding,isopentenyl-diphosphate delta-isomerase activity,hyd	3	4	NaN	NaN	NaN	NaN	NaN	NaN	NaN	NaN	23.5311	26.2148	24.3361	NaN	NaN	NaN	NaN	NaN	NaN	NaN	NaN	NaN	24.3415	23.5185	24.7143	24.1302	10	10	48.3	30.533	0	84.898	880070000	27
DERPT_G8523	Full=Neuroendocrine convertase 2 Short=NEC 2 ame: Full=KEX2-like endoprotease 2 ame: Full=Prohormone convertase 2 ame: Full=Pro convertase 2 Short=PC2 Flags: Precursor extracellular space,early endosome,endoplasmic reticulum,trans-Golgi network transport v	3	4	NaN	NaN	NaN	NaN	22.4401	25.7677	24.5109	NaN	NaN	NaN	NaN	NaN	NaN	NaN	NaN	NaN	NaN	NaN	NaN	NaN	23.4609	22.8184	23.8087	22.9657	10	10	25.8	70.974	0	83.888	702210000	30
DERPT_G10730	Full=GILT Flags: Precursor cytoplasm,intracellular membrane-bounded organelle,oxidoreductase activity, acting on a sulfur group of donors,antigen processing and presentation of exogenous peptide antigen,biological regulation	6	4	NaN	NaN	NaN	23.7065	23.222	23.3081	NaN	NaN	25.4533	27.6965	24.0423	NaN	NaN	NaN	NaN	NaN	NaN	NaN	NaN	NaN	23.8392	24.599	24.0473	24.1613	8	8	16.7	48.397	0	83.673	1583100000	20
DERPT_G9018	Full=Hydroxyacylglutathione mitochondrial ame: Full=Glyoxalase II Short=Glx II Flags: Precursor mitochondrion,cytosol,hydroxyacylglutathione hydrolase activity,glutathione biosynthetic process,methylglyoxal catabolic process to D-lactate via S-lactoyl-glut	6	4	NaN	NaN	NaN	NaN	NaN	22.0833	NaN	21.2065	23.8462	28.0613	27.3591	23.7419	NaN	NaN	NaN	NaN	NaN	NaN	NaN	NaN	26.0223	25.6449	25.8446	25.8959	10	10	48.3	32.711	0	82.995	3936800000	62
DERPT_G5404	Full=60S ribosomal L27a nucleolus,plasmodesma,membrane,cytosolic large ribosomal subunit,preribosome, large subunit precursor,RNA binding,structural constituent of ribosome,cytoplasmic translation,flower development,inflorescence development,response to ch	0	4	NaN	NaN	NaN	NaN	NaN	NaN	NaN	NaN	NaN	NaN	NaN	NaN	NaN	NaN	NaN	NaN	NaN	NaN	NaN	NaN	25.5818	26.873	25.2222	26.3465	6	6	36.7	16.769	0	82.991	2357100000	18
DERPT_G4132	Full=Uridine phosphorylase 1 Short=UPase 1 Short= ase 1 cytoplasm,uridine phosphorylase activity,uridine catabolic process,pyrimidine nucleotide metabolic process,nucleotide catabolic process,pyrimidine nucleobase metabolic process	3	4	NaN	NaN	NaN	NaN	NaN	NaN	23.5506	25.949	24.0286	NaN	NaN	NaN	NaN	NaN	NaN	NaN	NaN	NaN	NaN	NaN	24.8306	25.0901	23.9274	24.762	11	11	45.4	38.205	0	82.389	1288600000	22
DERPT_G8580	Full=Glycogenin-1 Short=GN-1 Short=GN1 membrane,Golgi apparatus part,striated muscle dense body,extracellular exosome,glucose binding,glycogenin glucosyltransferase activity,glucuronosyltransferase activity,glycogen biosynthetic process,response to stress,	5	4	NaN	NaN	22.9436	NaN	NaN	NaN	23.8436	24.1541	24.2169	23.3058	NaN	NaN	NaN	NaN	NaN	NaN	NaN	NaN	NaN	NaN	25.4122	25.437	25.0462	25.729	10	10	51.5	36.944	0	82.261	1664600000	56
DERPT_G1633	Full=Adenylyltransferase and sulfurtransferase MOCS3 ame: Full=Molybdenum cofactor synthesis 3 Includes: ame: Full=Molybdopterin-synthase adenylyltransferase ame: Full=Adenylyltransferase MOCS3 ame: Full=Sulfur carrier MOCS2A adenylyltransferase Includes:	6	4	NaN	NaN	22.4493	NaN	22.7089	23.9833	23.9877	25.2262	23.9963	NaN	NaN	NaN	NaN	NaN	NaN	NaN	NaN	NaN	NaN	NaN	25.3566	25.6878	24.564	26.0746	8	8	37.7	44.867	0	82.201	1940500000	35
DERPT_G9848	Full= FAM186A	9	4	NaN	NaN	NaN	NaN	NaN	NaN	NaN	NaN	NaN	24.7038	27.929	27.569	29.969	29.4494	29.1406	27.9781	26.8126	25.5728	NaN	NaN	25.3867	25.4093	26.2909	25.9754	7	6	33.9	68.275	0	82.189	4257300000	52
DERPT_G8198	Full=Lissencephaly-1 homolog protein phosphatase type 2A complex,nucleoplasm,Golgi apparatus,cytoskeleton,plasma membrane,bicellular tight junction,somatodendritic compartment,neuron projection,postsynapse,DNA-binding transcription factor activity,estrogen	0	4	NaN	NaN	NaN	NaN	NaN	NaN	NaN	NaN	NaN	NaN	NaN	NaN	NaN	NaN	NaN	NaN	NaN	NaN	NaN	NaN	23.8937	23.5487	24.1292	24.2398	7	7	16.9	88.758	0	82.121	1905700000	23
DERPT_G5103	Full=Pseudouridine-5 -phosphatase ame: Full=Haloacid dehalogenase-like hydrolase domain-containing 1 ame: Full=Haloacid dehalogenase-like hydrolase domain-containing 1A ame: Full= GS1 ame: Full=Pseudouridine-5 -monophosphatase Short=5 - ase mitochondrion,c	4	4	NaN	NaN	NaN	NaN	NaN	NaN	NaN	NaN	25.5469	27.1897	26.2071	24.4725	NaN	NaN	NaN	NaN	NaN	NaN	NaN	NaN	25.4912	25.0671	24.2584	25.5899	7	7	60.8	27	0	81.547	2180100000	52
DERPT_G600	Full=NADH dehydrogenase nucleoplasm,mitochondrial respiratory chain complex I,NADH dehydrogenase (ubiquinone) activity,ubiquitin protein ligase binding,metal ion binding,quinone binding,NAD binding,4 iron, 4 sulfur cluster binding,mitochondrial electron tr	0	4	NaN	NaN	NaN	NaN	NaN	NaN	NaN	NaN	NaN	NaN	NaN	NaN	NaN	NaN	NaN	NaN	NaN	NaN	NaN	NaN	23.2877	25.4776	22.1506	24.8882	11	11	21.7	89.075	0	81.464	713290000	32
DERPT_G608	Full=ADP-sugar pyrophosphatase ame: Full=8-oxo-dGDP phosphatase ame: Full=Nuclear ATP-synthesis NUDIX5 ame: Full=Nucleoside diphosphate-linked moiety X motif 5 Short=Nudix motif 5 binding,pyrophosphatase activity,nucleobase-containing compound metabolic pr	6	4	NaN	NaN	22.2655	22.573	24.5471	23.9361	25.4658	26.1458	NaN	NaN	NaN	NaN	NaN	NaN	NaN	NaN	NaN	NaN	NaN	NaN	23.7103	23.7426	24.1703	24.3083	5	5	26.2	30.886	0	81.403	1286400000	22
DERPT_G243	Q5UNY4.1RecName: Full=Uncharacterized protein L728	3	4	NaN	NaN	NaN	NaN	NaN	25.3487	26.0688	26.05	NaN	NaN	NaN	NaN	NaN	NaN	NaN	NaN	NaN	NaN	NaN	NaN	24.1049	24.5403	25.1308	24.2002	19	19	36.8	76.551	0	81.332	1690200000	56
DERPT_G10555	Full=Cysteine synthase Short=CSase ame: Full=O-acetylserine (thiol)-lyase Short=OAS-TL ame: Full=O-acetylserine sulfhydrylase extracellular region,nucleus,mitochondrion,cytosol,cytoplasmic stress granule,striated muscle dense body,cell periphery,mRNA bindi	5	4	NaN	NaN	NaN	22.0103	23.8541	25.9271	26.8294	25.6567	NaN	NaN	NaN	NaN	NaN	NaN	NaN	NaN	NaN	NaN	NaN	NaN	25.6197	25.5208	24.8876	25.7976	19	19	38.6	82.497	0	81.172	2633000000	59
DERPT_G3002	Full=Ribulokinase kinase activity,protein kinase regulator activity,prenol kinase activity,carbohydrate metabolic process,regulation of protein kinase activity	2	4	NaN	NaN	NaN	NaN	NaN	25.0829	25.4556	NaN	NaN	NaN	NaN	NaN	NaN	NaN	NaN	NaN	NaN	NaN	NaN	NaN	23.9293	24.0974	23.8901	23.9541	9	9	22.4	63.751	0	81.097	916590000	31
DERPT_G546	Full=Sterol 3-beta-glucosyltransferase ame: Full=Autophagy-related 26 transferase activity, transferring hexosyl groups,lipid metabolic process,cellular process	6	0	NaN	NaN	NaN	NaN	NaN	NaN	NaN	NaN	NaN	NaN	NaN	25.5126	25.49	25.8987	25.7026	24.6148	24.7056	NaN	NaN	NaN	NaN	NaN	NaN	NaN	13	13	49	52.346	0	80.251	747690000	28
DERPT_G5306	Full=Reticulon-4 receptor-like 2 ame: Full=Nogo receptor-like 3 ame: Full=Nogo-66 receptor homolog 1 ame: Full=Nogo-66 receptor-related 2 Short= 2 Flags: Precursor membrane,cell part,multicellular organismal process,developmental process,anatomical structu	0	4	NaN	NaN	NaN	NaN	NaN	NaN	NaN	NaN	NaN	NaN	NaN	NaN	NaN	NaN	NaN	NaN	NaN	NaN	NaN	NaN	23.6902	24.3564	22.6731	26.0788	14	14	22.8	112.31	0	80.214	872270000	21
DERPT_G5469	Full=Low molecular weight -tyrosine-phosphatase ame: Full=Phosphotyrosine phosphatase A Short=PTPase A nucleus,cytoplasm,cytoplasmic side of plasma membrane,extracellular exosome,acid phosphatase activity,non-membrane spanning protein tyrosine phosphatase	5	0	23.911	NaN	NaN	NaN	NaN	22.4811	NaN	NaN	NaN	23.9605	24.9185	23.8073	NaN	NaN	NaN	NaN	NaN	NaN	NaN	NaN	NaN	NaN	NaN	NaN	5	5	52.2	18.228	0	80.108	527710000	20
DERPT_G6094	Full=Alpha-actinin-1 ame: Full=Alpha-actinin cytoskeletal isoform ame: Full=F-actin cross-linking ame: Full=Non-muscle alpha-actinin-1 nucleus,Golgi apparatus,lipid droplet,cytosol,fascia adherens,spectrin,spectrin-associated cytoskeleton,microtubule cytos	8	4	NaN	NaN	23.7633	23.2967	NaN	NaN	NaN	25.5118	26.1379	26.2548	26.7839	24.9633	26.3522	NaN	NaN	NaN	NaN	NaN	NaN	NaN	24.8508	26.8762	25.4474	25.1305	23	23	12.3	292.39	0	79.84	3840200000	55
DERPT_G8116	Full=Glucose 1-dehydrogenase membrane,oxidoreductase activity, acting on the CH-OH group of donors, NAD or NADP as acceptor,xylulose metabolic process	2	4	NaN	NaN	NaN	NaN	NaN	NaN	NaN	NaN	NaN	NaN	24.996	25.3558	NaN	NaN	NaN	NaN	NaN	NaN	NaN	NaN	25.6945	26.8057	25.1549	26.3433	8	8	35.8	29.26	0	79.835	2637400000	27
DERPT_G7482	Full=Procollagen-lysine,2-oxoglutarate 5-dioxygenase 1 ame: Full=Lysyl hydroxylase 1 Short=LH1 Flags: Precursor endoplasmic reticulum,UDP-glucose:glycoprotein glucosyltransferase activity,procollagen-lysine 5-dioxygenase activity,procollagen glucosyltransf	5	3	NaN	NaN	23.2347	25.5758	25.5649	24.4335	23.5739	NaN	NaN	NaN	NaN	NaN	NaN	NaN	NaN	NaN	NaN	NaN	NaN	NaN	23.392	23.2008	NaN	23.7424	10	10	32.5	52.569	0	79.567	923240000	29
DERPT_G3356	Full= homolog subfamily A member 1 Flags: Precursor ubiquitin ligase complex,cell wall,nucleolus,plasma membrane,plasmodesma,perinuclear region of cytoplasm,extracellular exosome,TRC complex,cytoplasmic side of endoplasmic reticulum membrane,G-protein coup	2	4	NaN	NaN	NaN	NaN	NaN	NaN	NaN	24.1735	26.1821	NaN	NaN	NaN	NaN	NaN	NaN	NaN	NaN	NaN	NaN	NaN	23.4086	23.9988	23.2814	23.9625	7	7	27	45.53	0	79.241	1217400000	25
DERPT_G434	---NA---	8	4	24.8487	23.1501	NaN	NaN	NaN	NaN	25.7158	27.8911	26.5997	25.4337	24.8541	24.2096	NaN	NaN	NaN	NaN	NaN	NaN	NaN	NaN	25.7328	25.0522	26.1071	25.4879	7	7	32.9	26.103	0	79.104	3847200000	41
DERPT_G11475	Full=Mite group 2 allergen Gly d ame: Allergen=Gly d	6	4	NaN	NaN	NaN	NaN	NaN	NaN	24.3309	26.811	27.8061	27.069	25.0362	NaN	NaN	NaN	NaN	NaN	NaN	25.0922	NaN	NaN	26.7619	26.8251	27.0204	26.7335	7	7	50.9	18.91	0	78.995	5652500000	38
DERPT_G8132	Full=Adult-specific rigid cuticular Short=ACP structural constituent of cuticle	8	0	NaN	NaN	NaN	NaN	NaN	NaN	NaN	NaN	NaN	NaN	NaN	NaN	24.8193	27.1511	28.8673	29.5544	28.9082	28.3017	27.1297	25.4784	NaN	NaN	NaN	NaN	7	7	18.9	40.554	0	78.661	638160000	37
DERPT_G7262	Full=Glutamate-rich WD repeat-containing 1 intracellular non-membrane-bounded organelle,protein-containing complex,nucleoplasm part,nucleic acid binding,protein binding,chromatin organization,multicellular organism development,ribosome biogenesis,macromole	0	4	NaN	NaN	NaN	NaN	NaN	NaN	NaN	NaN	NaN	NaN	NaN	NaN	NaN	NaN	NaN	NaN	NaN	NaN	NaN	NaN	24.4281	23.6722	24.345	24.2187	8	8	25.4	64.066	0	78.266	718540000	18
DERPT_G9147	Full=Splicing factor U2af large subunit B ame: Full=U2 auxiliary factor 65 kDa subunit B ame: Full=U2 small nuclear ribonucleo auxiliary factor large subunit B Short=U2 snRNP auxiliary factor large subunit B commitment complex,Prp19 complex,nuclear speck,a	12	4	NaN	NaN	NaN	NaN	NaN	NaN	NaN	23.7631	26.007	29.3842	29.3499	29.37	29.5616	28.2896	27.5655	27.0871	26.5191	26.2456	NaN	25.5606	24.468	22.7713	24.6209	23.7283	8	6	6.3	129.66	0	78.117	6307700000	56
DERPT_G8746	Full=PITH domain-containing 1 nucleus,disulfide oxidoreductase activity,cellular response to DNA damage stimulus,obsolete electron transport	3	4	NaN	NaN	NaN	NaN	NaN	NaN	NaN	NaN	24.0527	26.3121	24.3956	NaN	NaN	NaN	NaN	NaN	NaN	NaN	NaN	NaN	25.1002	24.5789	24.8396	24.697	9	9	40.7	23.981	0	77.836	1250700000	32
DERPT_G5052	Full=UPF0160 nucleus,cytoplasm,locomotory exploration behavior	4	4	NaN	NaN	NaN	NaN	NaN	24.8768	27.0859	26.263	24.2135	NaN	NaN	NaN	NaN	NaN	NaN	NaN	NaN	NaN	NaN	NaN	25.5258	25.2459	26.0324	25.5919	18	18	57.7	45.134	0	77.686	2734400000	51
DERPT_G5752	Full=Tropomodulin-1 ame: Full=Erythrocyte tropomodulin Short=E-Tmod cytosol,striated muscle thin filament,COP9 signalosome,membrane,M band,cell projection,cardiac myofibril,terminal web,tropomyosin binding,actin filament binding,nematode larval development	3	1	NaN	NaN	NaN	NaN	NaN	NaN	NaN	NaN	24.071	25.8451	25.9127	NaN	NaN	NaN	NaN	NaN	NaN	NaN	NaN	NaN	NaN	NaN	24.0638	NaN	11	11	18.2	54.367	0	76.548	765330000	23
DERPT_G6933	Full=26S proteasome regulatory subunit RPN8 nucleoplasm,eukaryotic translation initiation factor 3 complex,proteasome regulatory particle, lid subcomplex,membrane,dendrite,proteasome storage granule,extracellular exosome,thiol-dependent ubiquitinyl hydrola	2	4	NaN	NaN	22.8267	NaN	22.6648	NaN	NaN	NaN	NaN	NaN	NaN	NaN	NaN	NaN	NaN	NaN	NaN	NaN	NaN	NaN	23.6363	24.95	23.0397	24.842	10	10	51.6	39.127	0	76.447	733380000	31
DERPT_G11779	Full=Ras-related Rab-1B nucleus,mitochondrion,early endosome,vacuole,endoplasmic reticulum membrane,endoplasmic reticulum-Golgi intermediate compartment,cytosol,plasma membrane,cell-cell adherens junction,trans-Golgi network membrane,phagophore assembly si	10	4	NaN	23.4149	NaN	NaN	22.6809	22.4805	22.6	23.9279	24.4483	26.7073	25.5673	24.3202	NaN	NaN	22.8366	NaN	NaN	NaN	NaN	NaN	23.7805	25.2238	23.5077	24.8252	10	9	54.9	22.699	0	76.281	1563800000	31
DERPT_G7270	Full=Succinate-- ligase nucleus,Golgi apparatus,microtubule organizing center,plasma membrane,myelin sheath,succinate-CoA ligase complex (GDP-forming),extracellular exosome,succinate-CoA ligase (ADP-forming) activity,succinate-CoA ligase (GDP-forming) acti	3	4	NaN	NaN	NaN	NaN	NaN	NaN	NaN	24.6036	NaN	NaN	23.6703	26.1861	NaN	NaN	NaN	NaN	NaN	NaN	NaN	NaN	24.9858	27.3611	23.6559	26.5115	20	20	50.9	48.218	0	75.775	3103600000	51
DERPT_G9685	Full=Glutamate receptor kainate 3 Short= 3 ame: Full=Glutamate receptor 7 Short= -7 Short= 7 Flags: Precursor axon,dendrite,kainate selective glutamate receptor complex,presynaptic membrane,neuronal cell body,cell projection part,postsynaptic membrane,musc	4	4	NaN	NaN	NaN	NaN	NaN	NaN	NaN	22.6255	25.1088	27.5008	26.2418	NaN	NaN	NaN	NaN	NaN	NaN	NaN	NaN	NaN	24.518	24.4322	23.1016	24.2612	8	8	24.6	48.381	0	75.733	1554200000	27
DERPT_G787	Full=Phosphatidylinositide phosphatase SAC1 ame: Full=Suppressor of actin mutations 1 fungal-type vacuole membrane,endosome,endoplasmic reticulum,plasma membrane,integral component of membrane,nuclear periphery,PAS complex,phosphatidylinositol-3,5-bisphosp	3	0	NaN	NaN	NaN	NaN	NaN	NaN	NaN	NaN	NaN	22.2754	26.577	22.2262	NaN	NaN	NaN	NaN	NaN	NaN	NaN	NaN	NaN	NaN	NaN	NaN	2	2	1.5	109.35	0	75.164	327340000	5
DERPT_G8384	Full=Paramyosin	14	4	NaN	NaN	NaN	NaN	27.3078	27.7283	28.1619	25.4478	25.5001	NaN	NaN	25.1225	26.8586	27.0125	28.2683	27.8269	27.6848	25.6188	25.4586	25.5236	25.8599	25.7969	26.5179	26.0104	9	9	25.5	44.904	0	75.073	2097000000	30
DERPT_G7934	Full=Aspartate--tRNA cytoplasmic ame: Full=Aspartyl-tRNA synthetase Short= nucleus,endoplasmic reticulum,cytosol,plasmodesma,membrane,extracellular exosome,RNA binding,aspartate-tRNA ligase activity,protein binding,ATP binding,aspartyl-tRNA aminoacylation,	0	4	NaN	NaN	NaN	NaN	NaN	NaN	NaN	NaN	NaN	NaN	NaN	NaN	NaN	NaN	NaN	NaN	NaN	NaN	NaN	NaN	22.6656	25.0725	21.8499	24.0491	14	14	37.3	63.022	0	74.893	505620000	31
DERPT_G8466	Full=Adrenocorticotropic hormone receptor Short=ACTH receptor Short=ACTH-R ame: Full=Adrenocorticotropin receptor ame: Full=Melanocortin receptor 2 Short=MC2-R integral component of membrane,cytoplasmic part,G-protein coupled receptor activity,glycerophosp	6	4	NaN	NaN	21.0158	NaN	24.5816	28.1625	27.3677	23.9642	NaN	NaN	NaN	NaN	NaN	25.004	NaN	NaN	NaN	NaN	NaN	NaN	26.2456	27.6757	24.334	26.4915	17	17	20	100.1	0	74.796	5106900000	56
DERPT_G7657	Full=Histone deacetylase 1 Short=HD1 heterochromatin,replication fork,transcription factor complex,polytene chromosome interband,nucleolus,cytosol,chloroplast envelope,Sin3 complex,NuRD complex,Myb complex,Rpd3S complex,Rpd3L complex,nuclear periphery,ESC/	0	4	NaN	NaN	NaN	NaN	NaN	NaN	NaN	NaN	NaN	NaN	NaN	NaN	NaN	NaN	NaN	NaN	NaN	NaN	NaN	NaN	24.3611	25.0693	23.7959	25.163	11	11	34.7	58.48	0	74.446	813840000	29
DERPT_G1692	Full=60S ribosomal L7a nucleolus,vacuolar membrane,Golgi apparatus,cell-cell adherens junction,focal adhesion,plasmodesma,chloroplast,cytosolic large ribosomal subunit,polysomal ribosome,extracellular exosome,RNA binding,structural constituent of ribosome,	7	4	25.5831	NaN	NaN	NaN	24.4661	NaN	NaN	NaN	NaN	NaN	NaN	27.2952	26.9075	26.3128	25.7741	24.4136	NaN	NaN	NaN	NaN	24.2249	25.6341	24.4546	25.7453	16	16	23.7	75.699	0	74.251	2527500000	44
DERPT_G11333	Full=Motile sperm domain-containing 2 extracellular region,membrane,chitin binding,chitin metabolic process	6	4	23.4241	NaN	NaN	NaN	NaN	NaN	NaN	NaN	22.921	27.5555	27.0024	26.4424	23.6949	NaN	NaN	NaN	NaN	NaN	NaN	NaN	24.1306	24.1283	23.8658	24.4072	13	11	29.5	50.504	0	74.228	1942300000	44
DERPT_G6278	Full=Adenylosuccinate synthetase Short=AMPSase Short= ame: Full=IMP--aspartate ligase cytoplasm,membrane,magnesium ion binding,GTPase activity,adenylosuccinate synthase activity,GTP binding,protein homodimerization activity,actin filament binding,aspartate	7	4	NaN	NaN	22.2905	22.2851	23.2054	24.8578	25.8106	25.5238	21.8658	NaN	NaN	NaN	NaN	NaN	NaN	NaN	NaN	NaN	NaN	NaN	26.6224	26.6757	27.1186	25.8683	17	17	34.4	56.729	0	74.115	3507100000	60
DERPT_G7254	---NA---	5	4	NaN	NaN	NaN	NaN	NaN	NaN	NaN	NaN	25.1464	26.7468	27.119	NaN	26.154	26.3267	NaN	NaN	NaN	NaN	NaN	NaN	27.5513	26.9634	29.252	26.3548	10	6	52.5	21.897	0	74.109	11857000000	68
DERPT_G8949	Full=VIP36 ame: Full=Lectin mannose-binding 2-like Short=LMAN2 Flags: Precursor endoplasmic reticulum,endoplasmic reticulum-Golgi intermediate compartment,Golgi apparatus,integral component of membrane,vesicle,extracellular region part,intracellular organe	2	3	NaN	NaN	NaN	NaN	NaN	NaN	NaN	NaN	25.2774	24.2636	NaN	NaN	NaN	NaN	NaN	NaN	NaN	NaN	NaN	NaN	24.1925	24.1816	NaN	24.8066	8	8	26.7	38.691	0	73.68	723380000	19
DERPT_G7996	---NA---	3	4	NaN	NaN	NaN	NaN	NaN	NaN	NaN	NaN	NaN	24.6872	26.7599	27.0005	NaN	NaN	NaN	NaN	NaN	NaN	NaN	NaN	25.4987	25.0581	26.4957	25.4496	7	7	70	13.678	0	73.634	2395500000	40
DERPT_G6237	Full=Cytochrome b-c1 complex subunit mitochondrial ame: Full=Complex III subunit 5 ame: Full=Cytochrome b-c1 complex subunit 5 ame: Full=Rieske iron-sulfur Short=RISP ame: Full=Rieske UQCRFS1 ame: Full=Ubiquinol-cytochrome c reductase iron-sulfur subunit C	7	4	NaN	NaN	22.9542	NaN	NaN	NaN	NaN	NaN	23.3784	24.473	26.3762	25.344	22.7667	23.6926	NaN	NaN	NaN	NaN	NaN	NaN	27.1239	26.7389	28.7094	27.0296	12	12	55.1	31.21	0	73.616	6507600000	71
DERPT_G3763	Full=NADH dehydrogenase nucleoplasm,mitochondrial respiratory chain complex I,mitochondrial matrix,NADH dehydrogenase activity,protein-containing complex binding,response to salt stress,cellular metabolic process,small molecule metabolic process,cellular p	5	0	NaN	NaN	NaN	NaN	NaN	NaN	NaN	NaN	NaN	NaN	NaN	NaN	NaN	25.7555	26.5169	26.8164	26.4572	25.2847	NaN	NaN	NaN	NaN	NaN	NaN	12	12	41.3	47.621	0	73.43	480640000	23
DERPT_G7008	Full=ADP ATP translocase 2 ame: Full=ADP,ATP carrier 2 ame: Full=Adenine nucleotide translocator 2 Short=ANT 2 ame: Full=Solute carrier family 25 member 5 Contains: ame: Full=ADP ATP translocase N-terminally processed nucleus,mitochondrial outer membrane,m	3	4	NaN	NaN	22.6391	NaN	NaN	NaN	NaN	NaN	NaN	NaN	NaN	22.1743	25.7041	NaN	NaN	NaN	NaN	NaN	NaN	NaN	26.6621	28.3945	25.3654	28.0837	18	18	56.9	32.986	0	73.234	5924500000	57
DERPT_G1271	Full=Adenylyl-sulfate kinase ame: Full=ATP adenosine-5 -phosphosulfate 3 -phosphotransferase ame: Full=Adenosine-5 -phosphosulfate kinase Short=APS kinase mitochondrion,plasma membrane,sulfate adenylyltransferase complex (ATP),chloroplast stroma,adenylylsu	0	4	NaN	NaN	NaN	NaN	NaN	NaN	NaN	NaN	NaN	NaN	NaN	NaN	NaN	NaN	NaN	NaN	NaN	NaN	NaN	NaN	22.9758	25.2626	20.8574	25.191	14	14	31	73.76	0	72.862	684820000	26
DERPT_G5845	Full=Purine nucleoside phosphoramidase ame: Full=Histidine triad nucleotide binding Short=HIT histone deacetylase complex,nucleolus,mitochondrion,peroxisome,cytosol,plasma membrane,extracellular exosome,protein kinase C binding,zinc ion binding,adenylylsul	6	4	NaN	NaN	NaN	NaN	NaN	22.6385	23.9962	23.4594	24.9975	25.7738	25.3737	NaN	NaN	NaN	NaN	NaN	NaN	NaN	NaN	NaN	23.7454	22.8812	23.6736	23.3476	6	6	36.6	25.501	0	72.662	1103100000	26
DERPT_G7429	Full=1,2-dihydroxy-3-keto-5-methylthiopentene dioxygenase ame: Full=Acireductone dioxygenase (Fe(2+)-requiring) Short=ARD Short=Fe-ARD nucleus,cytosol,plasma membrane,iron ion binding,heteropolysaccharide binding,acireductone dioxygenase [iron(II)-requirin	5	4	NaN	NaN	NaN	NaN	NaN	NaN	NaN	NaN	23.8545	27.189	26.8598	25.9847	25.5591	NaN	NaN	NaN	NaN	NaN	NaN	NaN	25.2292	25.1084	24.7335	25.5777	12	12	80.7	21.757	0	72.497	2262000000	46
DERPT_G9968	Full=Histone H2B nuclear chromosome, telomeric region,nuclear nucleosome,extracellular space,nucleoplasm,cytoplasm,extracellular exosome,DNA binding,protein heterodimerization activity,innate immune response in mucosa,nucleosome assembly,antibacterial humo	15	4	28.9831	26.4477	26.8064	27.6899	29.0241	27.9011	24.9588	NaN	22.6022	NaN	NaN	NaN	27.5147	27.5851	27.9599	27.3874	27.1373	26.4067	27.0828	NaN	28.4385	28.8715	28.5124	28.7765	7	2	39.5	13.865	0	72.453	17497000000	71
DERPT_G7470	Full=Nephrin ame: Full=Renal glomerulus-specific cell adhesion receptor Flags: Precursor extracellular region,plasma membrane,sarcomere,cell projection,membrane part,cytoskeletal protein binding,enzyme binding,muscle system process,nervous system developme	4	2	NaN	NaN	27.0241	25.553	NaN	NaN	22.6441	NaN	24.2386	NaN	NaN	NaN	NaN	NaN	NaN	NaN	NaN	NaN	NaN	NaN	21.7102	NaN	21.5946	NaN	14	14	23.4	97.573	0	72.335	837140000	23
DERPT_G5569	Der f acidic ribosomal like allergen, Proposed Eur-Allergen: Full=60S acidic ribosomal P2 nucleus,focal adhesion,membrane,cytosolic large ribosomal subunit,preribosome, large subunit precursor,extracellular exosome,structural constituent of ribosome,large	10	0	24.8661	24.1621	NaN	24.9995	NaN	24.7696	24.3496	27.4378	26.5417	NaN	24.5401	NaN	NaN	NaN	24.7571	25.3423	NaN	NaN	NaN	NaN	NaN	NaN	NaN	NaN	5	5	45.1	11.473	0	71.984	2997800000	30
DERPT_G10047	Full=Amphiphysin nuclear envelope,nucleoplasm,cytosol,synaptic vesicle,proteasome regulatory particle, lid subcomplex,plasmodesma,terminal bouton,intracellular non-membrane-bounded organelle,main axon,plasma membrane part,extracellular exosome,zinc ion bin	3	4	NaN	NaN	NaN	NaN	NaN	NaN	NaN	NaN	NaN	NaN	NaN	25.1899	26.1443	25.495	NaN	NaN	NaN	NaN	NaN	NaN	25.2536	26.0142	25.0141	25.8012	12	12	18.2	109.79	0	71.834	679140000	25
DERPT_G523	Full=Cytoplasmic dynein 1 intermediate chain 2 ame: Full=Cytoplasmic dynein intermediate chain 2 ame: Full=Dynein intermediate chain cytosolic Short=DH IC-2 kinetochore,spindle pole,nucleus,cytoplasmic dynein complex,cilium,cytoplasmic ribonucleoprotein gr	0	4	NaN	NaN	NaN	NaN	NaN	NaN	NaN	NaN	NaN	NaN	NaN	NaN	NaN	NaN	NaN	NaN	NaN	NaN	NaN	NaN	24.6438	24.5918	25.0367	24.4404	7	7	18.1	84.062	0	71.392	861370000	23
DERPT_G4892	Full=Eukaryotic translation initiation factor 2A Short=eIF-2A ribosome,RNA binding,protein binding,translation,response to stress,positive regulation of gene expression,biological_process,positive regulation of cellular process,regulation of nitrogen compo	0	4	NaN	NaN	NaN	NaN	NaN	NaN	NaN	NaN	NaN	NaN	NaN	NaN	NaN	NaN	NaN	NaN	NaN	NaN	NaN	NaN	24.8019	24.8728	24.7301	24.9917	16	16	45.7	60.031	0	71.122	942910000	36
DERPT_G3547	Full=Peptidyl-prolyl cis-trans isomerase FKBP5 Short=PPIase FKBP5 ame: Full=51 kDa FK506-binding Short=51 kDa FKBP Short=FKBP-51 ame: Full=FK506-binding 5 Short=FKBP-5 ame: Full=Rotamase nucleus,endoplasmic reticulum,cytosol,inaD signaling complex,axonal g	6	4	NaN	NaN	NaN	NaN	NaN	NaN	24.551	26.6067	23.8214	24.0338	23.5199	24.046	NaN	NaN	NaN	NaN	NaN	NaN	NaN	NaN	25.3812	25.8775	22.8643	26.1782	15	15	40.5	54.271	0	71.026	2233200000	53
DERPT_G8749	Full=CAD Includes: ame: Full=Glutamine-dependent carbamoyl-phosphate synthase Includes: ame: Full=Aspartate carbamoyltransferase Includes: ame: Full=Dihydroorotase nucleoplasm,cytosol,carbamoyl-phosphate synthase complex,integral component of membrane,nucl	0	4	NaN	NaN	NaN	NaN	NaN	NaN	NaN	NaN	NaN	NaN	NaN	NaN	NaN	NaN	NaN	NaN	NaN	NaN	NaN	NaN	23.8897	23.614	24.2721	24.0756	10	10	5.2	253.59	0	70.88	569380000	21
DERPT_G4131	Full=Ribonuclease T2-like Short=RNase T2-like Flags: Precursor vacuole,cell periphery,RNA binding,ribonuclease T2 activity,response to stress,cell communication,RNA metabolic process,developmental process,regulation of cellular process,cellular response to	3	4	NaN	NaN	NaN	NaN	NaN	NaN	NaN	NaN	NaN	24.029	25.9263	25.5635	NaN	NaN	NaN	NaN	NaN	NaN	NaN	NaN	24.6827	24.8837	23.6628	25.0604	8	8	58.4	26.927	0	70.728	1384100000	26
DERPT_G6418	Full= pterin-4-alpha-carbinolamine dehydratase Short=PHS ame: Full=4-alpha-hydroxy-tetrahydropterin dehydratase ame: Full=Pterin carbinolamine dehydratase Short=PCD nucleoplasm,mitochondrion,cytosol,extracellular exosome,transcription coactivator activity,	7	4	NaN	NaN	NaN	NaN	22.461	24.5725	25.2984	27.4569	27.6542	26.1202	NaN	NaN	NaN	NaN	NaN	NaN	NaN	22.8074	NaN	NaN	24.7869	23.2737	24.9204	23.9249	8	8	35.8	23.369	0	70.668	3041500000	41
DERPT_G11468	Full=Lissencephaly-1 homolog nucleoplasm,microtubule cytoskeleton,protein-containing complex,cytoskeletal part,catalytic complex,protein binding,developmental process involved in reproduction,regulation of transcription by RNA polymerase II,organelle organ	0	4	NaN	NaN	NaN	NaN	NaN	NaN	NaN	NaN	NaN	NaN	NaN	NaN	NaN	NaN	NaN	NaN	NaN	NaN	NaN	NaN	25.2266	25.2736	23.6308	25.6197	16	16	31.7	89.898	0	70.558	1232200000	41
DERPT_G7185	Full=Ubiquilin autophagosome,endoplasmic reticulum,plasma membrane,cytoplasmic vesicle,nuclear proteasome complex,cytosolic proteasome complex,polyubiquitin modification-dependent protein binding,identical protein binding,negative regulation of toll-like r	4	4	NaN	NaN	NaN	NaN	NaN	NaN	NaN	NaN	NaN	NaN	25.1454	27.1048	27.0881	26.007	NaN	NaN	NaN	NaN	NaN	NaN	25.8848	25.1068	26.7451	25.7189	9	9	14.7	67.624	0	70.378	1269400000	30
DERPT_G9170	---NA---	18	3	NaN	NaN	21.1877	21.9556	22.6962	25.2633	23.6787	24.5205	26.6249	29.6057	30.4471	29.4569	29.813	27.8116	27.8911	26.6525	27.3647	26.1934	25.1707	24.593	NaN	20.8411	21.9519	20.4791	5	5	7.6	56.943	0	70.181	6693700000	56
DERPT_G9397	Full=Small ubiquitin-related modifier 1 Short=SUMO-1 Flags: Precursor heterochromatin,fibrillar center,XY body,cytoplasm,microtubule organizing center,spindle,voltage-gated potassium channel complex,PML body,nuclear speck,dendrite,nuclear membrane,synapse,	7	4	NaN	NaN	NaN	NaN	NaN	NaN	NaN	22.5839	23.2051	27.7043	29.09	28.708	26.8623	23.2877	NaN	NaN	NaN	NaN	NaN	NaN	26.0364	25.5479	25.9626	25.9055	8	8	49.5	11.261	0	70.037	5824900000	41
DERPT_G8235	Full=Multidrug resistance-associated 1 ame: Full=ATP-binding cassette sub-family C member 1 ame: Full=Leukotriene C(4) transporter Short=LTC4 transporter vacuolar membrane,integral component of plasma membrane,lipid transporter activity,protein binding,ATP	1	4	25.6567	NaN	NaN	NaN	NaN	NaN	NaN	NaN	NaN	NaN	NaN	NaN	NaN	NaN	NaN	NaN	NaN	NaN	NaN	NaN	24.4528	24.8801	24.8748	24.6042	17	17	18.8	154.71	0	69.692	793940000	35
DERPT_G246	Full=26S proteasome non-ATPase regulatory subunit 13 ame: Full=26S proteasome regulatory subunit RPN9 ame: Full=26S proteasome regulatory subunit S11 ame: Full=26S proteasome regulatory subunit nucleus,proteasome regulatory particle, lid subcomplex,actin c	0	4	NaN	NaN	NaN	NaN	NaN	NaN	NaN	NaN	NaN	NaN	NaN	NaN	NaN	NaN	NaN	NaN	NaN	NaN	NaN	NaN	22.9502	23.6371	21.6006	23.4288	10	10	13.8	107.71	0	69.672	269360000	16
DERPT_G3650	---NA---	11	4	NaN	NaN	NaN	NaN	NaN	22.0268	22.808	23.3611	26.2367	28.9854	29.4726	27.4805	23.0452	22.7889	24.0777	23.8886	NaN	NaN	NaN	NaN	25.0077	20.7808	26.6276	24.1623	10	10	39.5	25.07	0	69.52	5916700000	46
DERPT_G4126	Full=Vacuolar-sorting snf7 ame: Full=Vacuolar -sorting-associated 32 ESCRT III complex,nuclear envelope,cytosol,cell-cell adherens junction,cytoplasmic side of plasma membrane,membrane coat,late endosome membrane,extracellular exosome,Flemming body,protein	5	4	23.3033	NaN	NaN	NaN	NaN	NaN	NaN	21.8659	24.5106	23.9968	24.3407	NaN	NaN	NaN	NaN	NaN	NaN	NaN	NaN	NaN	23.3342	23.2634	23.8405	23.1181	7	7	41.7	24.775	0	69.291	618790000	23
DERPT_G6860	Full=Acyl- thioesterase 1 mitochondrion,cytosol,lipase activity,carboxylic ester hydrolase activity,protein depalmitoylation,negative regulation of Golgi to plasma membrane protein transport,lipid catabolic process	6	4	NaN	NaN	NaN	NaN	NaN	NaN	NaN	21.9808	22.5866	24.6263	27.813	26.4929	25.2334	NaN	NaN	NaN	NaN	NaN	NaN	NaN	25.3547	25.2925	25.8922	26.5996	14	14	60.5	23.63	0	69.274	3112600000	39
DERPT_G10856	Full=Sorting nexin-1 nucleus,cell-cell adherens junction,retromer complex,extrinsic component of cytoplasmic side of plasma membrane,cell leading edge,extrinsic component of endosome membrane,early endosome membrane,macropinocytic cup,tubular endosome,dyna	0	4	NaN	NaN	NaN	NaN	NaN	NaN	NaN	NaN	NaN	NaN	NaN	NaN	NaN	NaN	NaN	NaN	NaN	NaN	NaN	NaN	22.6552	22.0905	22.5804	22.7003	13	13	33	49.105	0	69.132	770540000	25
DERPT_G3000	Full=Phospholipid hydroperoxide glutathione mitochondrial Short=PHGPx ame: Full=Glutathione peroxidase 4 Short=GPx-4 Short=GSHPx-4 Flags: Precursor nuclear envelope,mitochondrial inner membrane,cytosol,plasma membrane,chloroplast,apoplast,glutathione perox	10	4	NaN	NaN	NaN	NaN	24.1583	NaN	NaN	23.9043	25.1173	26.6926	25.6566	NaN	25.7939	26.5662	25.839	NaN	25.1212	25.0749	NaN	NaN	25.3286	26.6407	24.8897	26.0802	11	11	53.4	25.062	0	69.043	2026300000	38
DERPT_G6236	Full=Inositol monophosphatase 3 Short=IMP 3 Short=IMPase 3 ame: Full=Golgi 3-prime phosphoadenosine 5-prime phosphate 3-prime phosphatase Short=Golgi-resident PAP phosphatase Short=gPAPP ame: Full=Inositol monophosphatase domain-containing 1 ame: Full=Inos	2	4	NaN	NaN	NaN	23.5076	NaN	NaN	NaN	22.2286	NaN	NaN	NaN	NaN	NaN	NaN	NaN	NaN	NaN	NaN	NaN	NaN	24.9178	25.6797	23.6444	25.7121	12	12	43.7	35.133	0	68.859	1302200000	38
DERPT_G9203	novel human cystatin cysteine-type endopeptidase inhibitor activity	6	4	NaN	NaN	NaN	25.4993	26.6344	26.5936	25.6814	NaN	NaN	NaN	25.4034	26.6081	NaN	NaN	NaN	NaN	NaN	NaN	NaN	NaN	25.2544	24.4942	25.6142	24.6272	7	7	26.6	25.726	0	68.683	2611500000	24
DERPT_G497	Full=Golgi-associated plant pathogenesis-related 1 Short=GAPR-1 Short=Golgi-associated PR-1 ame: Full=Glioma pathogenesis-related 2 Short= 2 fungal-type vacuole,extracellular region,nuclear envelope,endoplasmic reticulum,fungal-type cell wall,membrane,magn	4	4	NaN	NaN	NaN	NaN	NaN	NaN	NaN	NaN	NaN	25.0989	26.468	27.6995	25.802	NaN	NaN	NaN	NaN	NaN	NaN	NaN	25.574	26.0368	23.7114	25.8335	10	10	62.6	22.296	0	68.68	2425900000	31
DERPT_G5922	Full=Vesicle-associated membrane -associated A Short=VAMP-A Short=VAMP-associated A Short=VAP-A ame: Full=33 kDa VAMP-associated Short=VAP-33 plant-type vacuole,Golgi apparatus,cytosol,plasma membrane,cell-cell adherens junction,bicellular tight junction,c	3	4	NaN	NaN	NaN	NaN	NaN	NaN	NaN	NaN	NaN	25.2662	25.7204	25.6802	NaN	NaN	NaN	NaN	NaN	NaN	NaN	NaN	25.9161	25.5917	25.9682	25.7214	12	12	14.6	82.998	0	68.46	2091600000	41
DERPT_G7533	Full=Low-density lipo receptor-related 2 Short=LRP-2 ame: Full=Glyco 330 Short=gp330 ame: Full=Megalin Flags: Precursor endosome,endoplasmic reticulum,Golgi-associated vesicle,caveola,clathrin-coated pit,integral component of membrane,apical plasma membran	6	4	23.9809	25.6449	24.2613	22.9575	23.2745	23.6758	NaN	NaN	NaN	NaN	NaN	NaN	NaN	NaN	NaN	NaN	NaN	NaN	NaN	NaN	24.7339	24.3376	23.4907	25.7637	26	26	8.2	533.94	0	68.304	877380000	45
DERPT_G10341	Full=Coatomer subunit epsilon ame: Full=Epsilon-coat Short=Epsilon-COP nucleoplasm,mitochondrion,vacuolar membrane,cytosol,COPI vesicle coat,structural molecule activity,protein binding,ER to Golgi vesicle-mediated transport,retrograde vesicle-mediated tra	0	3	NaN	NaN	NaN	NaN	NaN	NaN	NaN	NaN	NaN	NaN	NaN	NaN	NaN	NaN	NaN	NaN	NaN	NaN	NaN	NaN	23.0821	23.143	NaN	22.4273	4	4	20.8	34.384	0	67.515	203290000	8
DERPT_G5944	Full=Ubiquinone menaquinone biosynthesis C-methyltransferase ame: Full=2-methoxy-6-polyprenyl-1,4-benzoquinol methylase ame: Full=Demethylmenaquinone methyltransferase methyltransferase activity,metabolic process	4	4	NaN	NaN	NaN	NaN	NaN	NaN	NaN	NaN	24.7873	25.7109	26.2658	24.8983	NaN	NaN	NaN	NaN	NaN	NaN	NaN	NaN	26.0294	26.54	25.6409	26.1277	12	12	68.5	27.104	0	67.502	2926500000	54
DERPT_G8694	Full=Lysine--tRNA ligase ame: Full=Lysyl-tRNA synthetase Short= mitochondrion,cytosol,plasmodesma,microtubule cytoskeleton,aminoacyl-tRNA synthetase multienzyme complex,tRNA binding,mRNA binding,lysine-tRNA ligase activity,ATP binding,amino acid binding,me	0	4	NaN	NaN	NaN	NaN	NaN	NaN	NaN	NaN	NaN	NaN	NaN	NaN	NaN	NaN	NaN	NaN	NaN	NaN	NaN	NaN	24.5362	26.0662	23.733	24.9195	18	18	34	73.847	0	67.496	1352300000	29
DERPT_G8890	Full=Ubiquitin-conjugating enzyme E2 L3 ame: Full=E2 ubiquitin-conjugating enzyme L3 ame: Full=Ubiquitin carrier L3 ame: Full=Ubiquitin- ligase L3 proteasome complex,nucleus,cytoplasm,plasma membrane,extracellular exosome,transcription coactivator activity	0	4	NaN	NaN	NaN	NaN	NaN	NaN	NaN	NaN	NaN	NaN	NaN	NaN	NaN	NaN	NaN	NaN	NaN	NaN	NaN	NaN	23.4198	23.3494	22.8147	23.0939	6	6	51	18.416	0	67.304	563350000	17
DERPT_G7219	Full=Glutamine--tRNA ligase ame: Full=Glutaminyl-tRNA synthetase Short= mitochondrion,cytosol,microtubule associated complex,aminoacyl-tRNA synthetase multienzyme complex,mRNA binding,glutamine-tRNA ligase activity,ATP binding,glutaminyl-tRNA aminoacylatio	1	4	NaN	NaN	NaN	NaN	NaN	NaN	NaN	23.9512	NaN	NaN	NaN	NaN	NaN	NaN	NaN	NaN	NaN	NaN	NaN	NaN	25.1373	25.5366	22.6068	25.7356	17	17	32.6	89.171	0	66.936	1218400000	35
DERPT_G7986	Full=Motile sperm domain-containing 2 prospore membrane,mitochondrion,endosome,lipid droplet,cytosol,phosphatidylcholine transporter activity,phosphatidylinositol transporter activity,hydrolase activity,phospholipid transport,Golgi to plasma membrane prote	0	4	NaN	NaN	NaN	NaN	NaN	NaN	NaN	NaN	NaN	NaN	NaN	NaN	NaN	NaN	NaN	NaN	NaN	NaN	NaN	NaN	24.4013	25.1214	24.2862	25.1418	15	15	56.5	31.893	0	66.758	908240000	41
DERPT_G165	Full=L-2-hydroxyglutarate mitochondrial Flags: Precursor mitochondrion,integral component of membrane,protein binding,2-hydroxyglutarate dehydrogenase activity,cellular protein metabolic process,oxidation-reduction process	5	4	NaN	NaN	NaN	NaN	NaN	20.7338	23.308	28.0601	26.4425	21.926	NaN	NaN	NaN	NaN	NaN	NaN	NaN	NaN	NaN	NaN	24.7692	22.8446	25.0096	23.5649	12	12	20.4	75.463	0	66.694	2397000000	35
DERPT_G4931	Full=Zinc finger FYVE domain-containing 26 lysosome,membrane,cytoskeletal part,endopeptidase activity,protein binding,cysteine-type peptidase activity,peptidase activator activity involved in apoptotic process,phosphatidylinositol-3-phosphate binding,metal	9	4	24.8341	NaN	NaN	NaN	NaN	NaN	NaN	24.4543	25.6831	25.6429	26.0084	27.4126	27.1628	26.4409	25.0152	NaN	NaN	NaN	NaN	NaN	24.8908	25.5106	24.3687	24.7194	11	11	3.4	360.52	0	66.516	2277800000	44
DERPT_G10307	Full=40S ribosomal S16 cell wall,nucleolus,Golgi apparatus,focal adhesion,plasmodesma,chloroplast,membrane,cytosolic small ribosomal subunit,extracellular matrix,extracellular exosome,mRNA binding,structural constituent of ribosome,reproduction,maturation	0	4	NaN	NaN	NaN	NaN	NaN	NaN	NaN	NaN	NaN	NaN	NaN	NaN	NaN	NaN	NaN	NaN	NaN	NaN	NaN	NaN	25.8342	26.954	25.522	26.5434	13	13	62.6	16.805	0	65.794	2741100000	33
DERPT_G10073	Full=Importin subunit alpha-7 ame: Full=Karyopherin subunit alpha-6 nuclear exosome (RNase complex),fungal-type vacuole,nuclear pore,nucleoplasm,nucleolus,cytosol,fungal-type cell wall,integral component of membrane,dendrite,structural constituent of cell	0	4	NaN	NaN	NaN	NaN	NaN	NaN	NaN	NaN	NaN	NaN	NaN	NaN	NaN	NaN	NaN	NaN	NaN	NaN	NaN	NaN	23.268	24.803	22.5406	23.5581	11	11	8.9	205.14	0	65.517	487990000	25
DERPT_G7601	Full=Peptide methionine sulfoxide reductase Short= -methionine-S-oxide reductase ame: Full=Peptide-methionine (S)-S-oxide reductase Short=Peptide Met(O) reductase peptide-methionine (S)-S-oxide reductase activity,determination of adult lifespan,cellular re	3	4	NaN	NaN	NaN	NaN	NaN	NaN	NaN	NaN	NaN	26.4223	25.7967	24.5039	NaN	NaN	NaN	NaN	NaN	NaN	NaN	NaN	25.3103	25.9197	24.17	25.9862	8	8	48.1	23.253	0	65.338	2080000000	29
DERPT_G9386	Allergen Homolog (Der p1, Der f1): Full=Cathepsin K Flags: Precursor vacuole,cysteine-type peptidase activity,proteolysis,biological_process,response to stimulus	3	4	NaN	NaN	NaN	NaN	NaN	NaN	NaN	NaN	25.1979	25.3074	23.7864	NaN	NaN	NaN	NaN	NaN	NaN	NaN	NaN	NaN	24.5313	24.6558	23.6555	24.6786	6	6	24.8	47.674	0	65.237	918000000	16
DERPT_G9602	Full=Desumoylating isopeptidase 1 Short= -1 ame: Full=PPPDE peptidase domain-containing 2 ame: Full= FAM152B nucleoplasm,cytoplasm,microtubule cytoskeleton,microprocessor complex,double-stranded RNA binding,ribonuclease III activity,heme binding,protein ho	1	4	NaN	NaN	NaN	NaN	NaN	NaN	NaN	NaN	25.8592	NaN	NaN	NaN	NaN	NaN	NaN	NaN	NaN	NaN	NaN	NaN	25.7653	25.4401	24.0698	25.1429	10	10	12.6	133.11	0	64.625	1477600000	32
DERPT_G5700	Full=Malignant T-cell-amplified sequence 1 Short=MCT-1 plasma membrane,cytosolic small ribosomal subunit,protein-containing complex,RNA binding,formation of translation preinitiation complex,translation reinitiation,IRES-dependent translational initiation	4	4	NaN	NaN	NaN	NaN	NaN	NaN	NaN	NaN	NaN	25.0406	25.0755	NaN	26.4495	27.9857	NaN	NaN	NaN	NaN	NaN	NaN	24.6782	24.886	24.7257	25.6251	7	7	57.7	20.618	0	64.34	1681200000	29
DERPT_G4339	Full=Probable small nuclear ribonucleo G Short=snRNP-G ame: Full=Sm G Short=Sm-G Short= U5 snRNP,U1 snRNP,U6 snRNP,U12-type spliceosomal complex,nucleolus,small nucleolar ribonucleoprotein complex,cytosol,P granule,U4/U6 x U5 tri-snRNP complex,U2-type pres	3	4	NaN	NaN	NaN	NaN	NaN	NaN	25.4982	25.0789	25.64	NaN	NaN	NaN	NaN	NaN	NaN	NaN	NaN	NaN	NaN	NaN	24.8369	25.3566	25.9327	25.0559	5	5	59.4	11.812	0	64.112	1786000000	25
DERPT_G1322	Full=Short-chain specific acyl- mitochondrial Short=SCAD ame: Full=Butyryl- dehydrogenase Flags: Precursor cell wall,mitochondrial matrix,cytosol,plasma membrane,mitochondrial membrane,extracellular exosome,fatty-acyl-CoA binding,electron transfer activity	0	4	NaN	NaN	NaN	NaN	NaN	NaN	NaN	NaN	NaN	NaN	NaN	NaN	NaN	NaN	NaN	NaN	NaN	NaN	NaN	NaN	26.4055	27.0378	24.868	26.5165	18	18	54.9	46.282	0	64.04	2726400000	56
DERPT_G8974	Full=ATP-dependent RNA helicase DHH1 heterochromatin,P-body,outer dense fiber,nucleolus,mitochondrion,cytosol,microtubule associated complex,cell-cell adherens junction,cytoplasmic stress granule,membrane,RISC complex,P granule,sperm annulus,chromatin bind	0	4	NaN	NaN	NaN	NaN	NaN	NaN	NaN	NaN	NaN	NaN	NaN	NaN	NaN	NaN	NaN	NaN	NaN	NaN	NaN	NaN	24.9296	26.0149	24.2455	25.7903	10	10	34.5	49.158	0	63.773	1345600000	25
DERPT_G5715	Full=Growth factor receptor-bound 2 ame: Full=Adapter GRB2 ame: Full=SH2 SH3 adapter GRB2 nucleoplasm,nucleolus,endosome,Golgi apparatus,cytosol,cell-cell junction,COP9 signalosome,vesicle membrane,extracellular exosome,Grb2-EGFR complex,nucleotide binding	6	4	NaN	NaN	NaN	NaN	NaN	NaN	NaN	NaN	NaN	24.6757	25.8042	26.6794	26.2271	25.0118	26.5973	NaN	NaN	NaN	NaN	NaN	24.1323	23.6313	24.1658	24.5503	13	13	57.7	25.078	0	63.614	1367400000	36
DERPT_G11565	Full=60S ribosomal L9 nucleolus,vacuolar membrane,Golgi apparatus,plasma membrane,focal adhesion,plasmodesma,chloroplast envelope,cytosolic large ribosomal subunit,extracellular matrix,structural constituent of ribosome,rRNA binding,cytoplasmic translation	1	4	25.4563	NaN	NaN	NaN	NaN	NaN	NaN	NaN	NaN	NaN	NaN	NaN	NaN	NaN	NaN	NaN	NaN	NaN	NaN	NaN	24.8922	26.0657	24.5275	25.3579	12	12	64.7	21.181	0	63.569	1453300000	39
DERPT_G4251	Full=Luciferin 4-monooxygenase Short=Luciferase intracellular membrane-bounded organelle,cytoplasmic part,catalytic activity,auxin metabolic process,response to stimulus,monocarboxylic acid biosynthetic process	9	4	NaN	NaN	24.2516	NaN	NaN	24.1279	24.5443	26.2598	25.2513	NaN	26.014	25.8472	27.0685	NaN	25.8388	NaN	NaN	NaN	NaN	NaN	26.0244	26.9401	24.5659	26.5748	19	19	43.5	64	0	63.453	2943500000	51
DERPT_G8140	Full=Coatomer subunit beta ame: Full=Beta-coat Short=Beta-COP cytosol,plasmodesma,COPI vesicle coat,structural molecule activity,protein binding,peptide-methionine (R)-S-oxide reductase activity,cell morphogenesis,intracellular protein transport,ER to Golg	0	4	NaN	NaN	NaN	NaN	NaN	NaN	NaN	NaN	NaN	NaN	NaN	NaN	NaN	NaN	NaN	NaN	NaN	NaN	NaN	NaN	24.8411	25.9637	23.7338	25.8045	10	10	11	159.92	0	63.316	1269100000	26
DERPT_G3541	Full=60S ribosomal L10 ame: Full=Ribosomal L10 nucleolus,vacuolar membrane,endoplasmic reticulum,Golgi apparatus,polysome,chloroplast envelope,cytosolic large ribosomal subunit,neuronal cell body,mRNA binding,structural constituent of ribosome,protein bind	1	4	26.0222	NaN	NaN	NaN	NaN	NaN	NaN	NaN	NaN	NaN	NaN	NaN	NaN	NaN	NaN	NaN	NaN	NaN	NaN	NaN	25.9197	26.9434	25.1942	26.4133	7	7	32.3	25.404	0	63.131	2537900000	38
DERPT_G10179	Full=Zonadhesin Flags: Precursor protein binding	16	4	27.2014	27.7131	28.0592	26.8156	25.5774	24.9372	24.4418	23.5608	23.6296	25.2047	27.0136	26.2998	26.1496	24.6645	25.2965	25.0426	NaN	NaN	NaN	NaN	26.118	25.9997	27.4458	25.8884	22	22	19.8	117.82	0	63.057	6338500000	81
DERPT_G1090	Full=Metallo-beta-lactamase domain-containing 1	0	4	NaN	NaN	NaN	NaN	NaN	NaN	NaN	NaN	NaN	NaN	NaN	NaN	NaN	NaN	NaN	NaN	NaN	NaN	NaN	NaN	24.0397	23.7211	24.7111	23.7064	8	8	58.8	22.217	0	62.728	659720000	19
DERPT_G11242	Full=Adipocyte plasma membrane-associated membrane,intracellular membrane-bounded organelle,cytoplasmic part,strictosidine synthase activity,response to stimulus,terpenoid biosynthetic process,indole biosynthetic process	0	4	NaN	NaN	NaN	NaN	NaN	NaN	NaN	NaN	NaN	NaN	NaN	NaN	NaN	NaN	NaN	NaN	NaN	NaN	NaN	NaN	23.8741	25.4154	23.1727	24.0539	9	9	30.4	48.881	0	62.694	708070000	18
DERPT_G10471	Full=Acid phosphatase type 7 ame: Full=Purple acid phosphatase long form Flags: Precursor nucleus,focal adhesion,dendrite,cell body,cytoskeletal part,cytoplasmic part,plasma membrane region,acid phosphatase activity,protein tyrosine kinase activity,obsolet	0	4	NaN	NaN	NaN	NaN	NaN	NaN	NaN	NaN	NaN	NaN	NaN	NaN	NaN	NaN	NaN	NaN	NaN	NaN	NaN	NaN	24.9656	25.4006	25.058	24.4841	12	12	6.5	263.66	0	62.434	1126200000	31
DERPT_G1118	Full=26S proteasome non-ATPase regulatory subunit 12 ame: Full=26S proteasome regulatory subunit RPN5 ame: Full=26S proteasome regulatory subunit p55 nucleoplasm,COP9 signalosome,proteasome regulatory particle, lid subcomplex,plasmodesma,membrane,nuclear p	0	3	NaN	NaN	NaN	NaN	NaN	NaN	NaN	NaN	NaN	NaN	NaN	NaN	NaN	NaN	NaN	NaN	NaN	NaN	NaN	NaN	24.7157	25.5239	NaN	25.4208	14	14	7.4	302.14	0	62.272	936290000	31
DERPT_G1228	Full=Prostaglandin E synthase 3 ame: Full=Cytosolic prostaglandin E2 synthase Short=cPGES intracellular non-membrane-bounded organelle,nuclear part,cytoplasmic part,supramolecular fiber,protein binding,protein folding,fatty acid metabolic process,positive	6	4	23.7874	NaN	NaN	NaN	NaN	NaN	NaN	NaN	NaN	26.9233	28.5875	26.4959	25.8485	25.6791	NaN	NaN	NaN	NaN	NaN	NaN	26.5643	25.1514	26.3959	25.6112	11	11	57.7	22.826	0	62.146	3888300000	40
DERPT_G9862	Full=NADH dehydrogenase mitochondrial respiratory chain complex I,NADH dehydrogenase activity,mitochondrial electron transport, NADH to ubiquinone,obsolete electron transport	4	4	NaN	NaN	NaN	NaN	NaN	NaN	NaN	NaN	NaN	NaN	NaN	23.7944	26.6153	27.1356	26.7862	NaN	NaN	NaN	NaN	NaN	25.0678	26.5759	24.883	25.2583	8	8	31.5	49.199	0	61.508	837770000	23
DERPT_G5504	Full=Glutamine synthetase Short=GS ame: Full=Glutamate decarboxylase ame: Full=Glutamate--ammonia ligase nucleus,mitochondrion,rough endoplasmic reticulum,lipid droplet,perikaryon,myelin sheath,axon terminus,extracellular exosome,glial cell projection,magn	0	4	NaN	NaN	NaN	NaN	NaN	NaN	NaN	NaN	NaN	NaN	NaN	NaN	NaN	NaN	NaN	NaN	NaN	NaN	NaN	NaN	22.8556	24.8804	22.7285	23.0563	9	8	34.1	48.989	0	61.373	419640000	12
DERPT_G10863	Full=Pyrroline-5-carboxylate reductase 3 Short=P5C reductase 3 Short=P5CR 3 ame: Full=Pyrroline-5-carboxylate reductase cytoplasm,catalytic activity,response to stress,cellular amino acid biosynthetic process,heterocycle metabolic process,oxidation-reducti	0	4	NaN	NaN	NaN	NaN	NaN	NaN	NaN	NaN	NaN	NaN	NaN	NaN	NaN	NaN	NaN	NaN	NaN	NaN	NaN	NaN	24.1437	24.8862	24.3154	24.4727	9	9	28.6	48.362	0	61.307	734850000	25
DERPT_G1541	Full=Ubiquitin-60S ribosomal L40 ame: Full=Ubiquitin A-52 residue ribosomal fusion product 1 Contains: ame: Full=Ubiquitin Contains: ame: Full=60S ribosomal L40 ame: Full=CEP52 Flags: Precursor nucleoplasm,microtubule associated complex,plasma membrane,sma	3	4	NaN	NaN	NaN	NaN	NaN	NaN	NaN	NaN	NaN	NaN	25.8622	27.477	27.3016	NaN	NaN	NaN	NaN	NaN	NaN	NaN	24.8197	24.0138	25.7793	24.6383	3	3	15.3	25.1	0	61.079	1563500000	19
DERPT_G3103	Full=Choline kinase alpha Short=CK ame: Full=CHETK-alpha ame: Full=Ethanolamine kinase Short=EK cell part,binding,kinase activity,phosphotransferase activity, alcohol group as acceptor,glycerophospholipid biosynthetic process,system development,ammonium io	2	4	NaN	NaN	NaN	NaN	NaN	NaN	25.0754	24.7179	NaN	NaN	NaN	NaN	NaN	NaN	NaN	NaN	NaN	NaN	NaN	NaN	24.7463	25.1357	25.6416	24.6564	12	12	40.8	46.385	0	60.972	1413800000	31
DERPT_G11417	Full=Neural cell adhesion molecule L1 Short=N-CAM-L1 Short=NCAM-L1 ame: CD_antigen=CD171 Flags: Precursor cell part,protein binding,axonogenesis,animal organ development,response to stimulus	4	4	NaN	NaN	NaN	NaN	NaN	25.5742	NaN	24.898	24.8625	25.0863	NaN	NaN	NaN	NaN	NaN	NaN	NaN	NaN	NaN	NaN	25.1624	25.4482	24.9848	25.0667	19	19	27.8	93.632	0	60.858	2103000000	54
DERPT_G3522	---NA---	5	0	NaN	NaN	NaN	NaN	NaN	NaN	NaN	NaN	24.3429	26.4394	26.5548	24.9962	24.7785	NaN	NaN	NaN	NaN	NaN	NaN	NaN	NaN	NaN	NaN	NaN	6	6	10.9	51.539	0	60.73	803200000	16
DERPT_G3449	Full=Neuroglobin neuronal cell body,peroxidase activity,heme binding,nitrite reductase activity,response to chemical,cellular process,negative regulation of biological process,obsolete peroxidase reaction,response to oxidative stress	11	4	23.4798	NaN	23.9833	24.7122	24.107	NaN	NaN	NaN	23.981	26.1607	25.0471	26.1465	26.1826	25.5045	NaN	23.6904	NaN	NaN	NaN	NaN	23.7282	23.9392	23.677	22.6371	10	10	80.6	18.028	0	60.682	1432900000	37
DERPT_G9530	Full=60S ribosomal L12 nucleolus,vacuole,Golgi apparatus,focal adhesion,plasmodesma,chloroplast,membrane,cytosolic large ribosomal subunit,preribosome, large subunit precursor,extracellular matrix,extracellular exosome,structural constituent of ribosome,pr	20	4	25.6463	25.6909	26.4609	26.9496	27.042	27.5585	27.3974	26.761	25.9677	25.033	26.9188	28.3353	28.4985	27.461	25.7174	25.7422	26.0513	25.7515	25.6281	25.7319	24.6174	25.5113	25.0356	25.4516	8	8	58.8	17.844	0	60.529	6400300000	54
DERPT_G11754	Full=Purine nucleoside phosphorylase Short=PNP ame: Full=Inosine phosphorylase ame: Full=Inosine-guanosine phosphorylase nucleus,cytosol,extracellular exosome,nucleoside binding,purine nucleobase binding,purine-nucleoside phosphorylase activity,drug bindin	2	4	NaN	NaN	NaN	NaN	NaN	24.3819	26.0374	NaN	NaN	NaN	NaN	NaN	NaN	NaN	NaN	NaN	NaN	NaN	NaN	NaN	25.2123	25.3589	24.9496	25.4795	10	10	44.4	37.835	0	60.372	1723900000	42
DERPT_G11123	Full=VIP36 ame: Full=Lectin mannose-binding 2-like Short=LMAN2 Flags: Precursor endoplasmic reticulum,endoplasmic reticulum-Golgi intermediate compartment,Golgi apparatus,integral component of membrane,sarcomere,COPII-coated ER to Golgi transport vesicle,e	0	3	NaN	NaN	NaN	NaN	NaN	NaN	NaN	NaN	NaN	NaN	NaN	NaN	NaN	NaN	NaN	NaN	NaN	NaN	NaN	NaN	24.5863	25.9766	NaN	24.984	11	11	32.7	61.239	0	60.28	1247200000	21
DERPT_G5714	Full=FK506-binding 2 ame: Full=Peptidyl-prolyl cis-trans isomerase Short=PPIase ame: Full=Rotamase Flags: Precursor fungal-type vacuole,nucleus,endoplasmic reticulum membrane,Golgi apparatus,cytosol,chloroplast thylakoid lumen,extracellular exosome,peptidy	2	2	NaN	NaN	NaN	NaN	NaN	NaN	NaN	NaN	NaN	NaN	25.4918	21.6029	NaN	NaN	NaN	NaN	NaN	NaN	NaN	NaN	NaN	NaN	22.0413	21.9517	3	3	21.2	14.542	0	60.257	206510000	12
DERPT_G5756	Full=Protease 3 ame: Full=Pitrilysin ame: Full=Protease III ame: Full=Protease pi Flags: Precursor membrane,intracellular membrane-bounded organelle,cytoplasmic part,protein binding,peptidase activity,peptide binding,metal ion binding,protein metabolic pro	1	3	NaN	NaN	NaN	NaN	NaN	NaN	NaN	23.0772	NaN	NaN	NaN	NaN	NaN	NaN	NaN	NaN	NaN	NaN	NaN	NaN	23.3418	24.7305	NaN	24.267	15	15	20.8	134.19	0	60.223	773450000	26
DERPT_G6093	Full=Regucalcin Short=RC ame: Full=Gluconolactonase Short=GNL ame: Full=Senescence marker 30 Short=SMP-30 nucleus,mitochondrion,hydrolase activity,metal ion binding,negative regulation of macromolecule metabolic process,regulation of phosphate metabolic pr	4	4	NaN	NaN	NaN	NaN	NaN	NaN	NaN	24.441	25.8904	25.3994	23.5821	NaN	NaN	NaN	NaN	NaN	NaN	NaN	NaN	NaN	25.4785	25.8784	24.5698	25.7797	15	15	34	64.26	0	60.188	1975200000	39
DERPT_G174	Full=Calcium channel flower integral component of synaptic vesicle membrane,spanning component of plasma membrane,calcium channel activity,structural constituent of cuticle,calcium ion transport,cell competition in a multicellular organism,positive regulat	5	0	NaN	NaN	NaN	NaN	NaN	NaN	NaN	NaN	NaN	NaN	NaN	NaN	26.1116	26.3169	26.8213	24.2428	24.4842	NaN	NaN	NaN	NaN	NaN	NaN	NaN	6	6	19.7	60.943	0	59.896	585790000	19
DERPT_G8916	Full=Prolyl 3-hydroxylase OGFOD1 ame: Full=2-oxoglutarate and iron-dependent oxygenase domain-containing 1 ame: Full=uS12 prolyl 3-hydroxylase cytoplasm,intracellular organelle,iron ion binding,L-ascorbic acid binding,peptidyl-proline dioxygenase activity,	2	4	NaN	NaN	NaN	NaN	NaN	26.4157	25.8946	NaN	NaN	NaN	NaN	NaN	NaN	NaN	NaN	NaN	NaN	NaN	NaN	NaN	23.4229	22.9658	23.2371	23.2567	8	8	17.8	83.592	0	59.684	1076700000	22
DERPT_G10737	Full=Serine threonine- phosphatase 2B catalytic subunit alpha isoform ame: Full=CAM-PRP catalytic subunit ame: Full=Calmodulin-dependent calcineurin A subunit alpha isoform nucleoplasm,mitochondrion,cytosol,calcineurin complex,synaptic vesicle,Z disc,T-tub	5	4	NaN	NaN	NaN	23.4684	23.4092	24.3098	25.0819	23.9963	NaN	NaN	NaN	NaN	NaN	NaN	NaN	NaN	NaN	NaN	NaN	NaN	24.4154	24.4016	23.4308	24.1827	11	11	34.6	55.837	0	59.649	1069000000	27
DERPT_G8559	32989XP_001349661.1 conserved Plasmodium protein [Plasmodium falciparum 3D7] CZT98169.1 conserved Plasmodium protein, unknown function	5	4	NaN	NaN	NaN	NaN	25.1626	26.8911	26.2296	25.2499	27.1804	NaN	NaN	NaN	NaN	NaN	NaN	NaN	NaN	NaN	NaN	NaN	25.4384	24.9648	27.0281	25.2197	3	3	16.3	43.319	0	59.453	3724100000	26
DERPT_G9190	Full=Viral cathepsin Short=V-cath ame: Full=Cysteine ase Short=CP Flags: Precursor cysteine-type peptidase activity,proteolysis,response to organic substance	4	4	NaN	NaN	NaN	NaN	NaN	NaN	NaN	23.6645	25.2353	26.6014	24.7795	NaN	NaN	NaN	NaN	NaN	NaN	NaN	NaN	NaN	25.0239	24.6349	25.6209	25.2712	7	7	23.8	46.328	0	59.341	1664300000	30
DERPT_G3725	Full=Glucose 1-dehydrogenase nucleus,peroxisome,endomembrane system,organelle membrane,intracellular organelle part,oxidoreductase activity, acting on the CH-OH group of donors, NAD or NADP as acceptor,xylulose metabolic process,alcohol metabolic process,l	3	4	NaN	NaN	NaN	NaN	NaN	24.6586	27.3173	25.1045	NaN	NaN	NaN	NaN	NaN	NaN	NaN	NaN	NaN	NaN	NaN	NaN	24.7704	24.505	24.6597	24.6509	6	5	38.9	30.322	0	59.244	1989300000	27
DERPT_G72	Full=Endoribonuclease LACTB2 ame: Full=Beta-lactamase 2 mitochondrion,RNA binding,endonuclease activity,metal ion binding	3	4	NaN	NaN	NaN	NaN	NaN	NaN	NaN	NaN	24.1831	25.3486	25.3708	NaN	NaN	NaN	NaN	NaN	NaN	NaN	NaN	NaN	24.6268	24.9545	25.3749	24.7409	15	15	70.9	34.056	0	59.233	1443600000	37
DERPT_G10184	Full=S-adenosylmethionine synthase Short= et synthase ame: Full=Methionine adenosyltransferase Short=MAT cytosol,cytoplasmic stress granule,nuclear matrix,methionine adenosyltransferase complex,magnesium ion binding,methionine adenosyltransferase activity,	0	4	NaN	NaN	NaN	NaN	NaN	NaN	NaN	NaN	NaN	NaN	NaN	NaN	NaN	NaN	NaN	NaN	NaN	NaN	NaN	NaN	24.2643	24.4582	23.8726	24.552	10	10	32.8	47.176	0	59.12	690290000	27
DERPT_G10780	543916AAY66643.1 unknown	0	4	NaN	NaN	NaN	NaN	NaN	NaN	NaN	NaN	NaN	NaN	NaN	NaN	NaN	NaN	NaN	NaN	NaN	NaN	NaN	NaN	25.837	25.9826	25.6018	25.625	5	5	23	19.639	0	59.087	3131500000	30
DERPT_G3253	Full=ATP-dependent RNA helicase DDX1 ame: Full=DEAD box 1 acrosomal vesicle,endosome,cytosol,plasma membrane,synaptic vesicle,cytoplasmic stress granule,terminal bouton,perinuclear region of cytoplasm,presynaptic active zone,cleavage body,tRNA-splicing lig	1	4	NaN	NaN	NaN	NaN	NaN	NaN	NaN	NaN	NaN	NaN	NaN	23.5886	NaN	NaN	NaN	NaN	NaN	NaN	NaN	NaN	23.6326	23.8899	22.5892	23.1002	5	5	6.2	106.23	0	58.604	1884800000	24
DERPT_G795	Full=Polypeptide N-acetylgalactosaminyltransferase 1 ame: Full=Polypeptide c transferase 1 Short= c-T1 Short=pp- ase 1 ame: Full= -UDP acetylgalactosaminyltransferase 1 ame: Full=UDP- c:polypeptide N-acetylgalactosaminyltransferase 1 Contains: ame: Full=Po	3	4	NaN	NaN	NaN	NaN	NaN	NaN	23.2048	26.2581	23.7667	NaN	NaN	NaN	NaN	NaN	NaN	NaN	NaN	NaN	NaN	NaN	24.6278	24.3983	23.9774	25.0644	15	15	21.4	121.6	0	58.529	1294900000	33
DERPT_G11568	Full=ADP-ribosylation factor 1 Golgi membrane,nucleus,late endosome,vacuole,peroxisomal membrane,endoplasmic reticulum,Golgi stack,trans-Golgi network,cytosol,focal adhesion,postsynaptic density,sarcomere,COPI-coated vesicle,cell leading edge,cleavage furr	0	4	NaN	NaN	NaN	NaN	NaN	NaN	NaN	NaN	NaN	NaN	NaN	NaN	NaN	NaN	NaN	NaN	NaN	NaN	NaN	NaN	24.8348	25.6178	24.2241	25.4234	10	8	75.1	20.624	0	58.333	1106100000	32
DERPT_G9733	Full=Prostaglandin reductase 1 Short=PRG-1 ame: Full=15-oxoprostaglandin 13-reductase ame: Full=NADP-dependent leukotriene B4 12-hydroxydehydrogenase mitochondrion,peroxisome,13-prostaglandin reductase activity,response to oxidative stress,negative regulat	0	4	NaN	NaN	NaN	NaN	NaN	NaN	NaN	NaN	NaN	NaN	NaN	NaN	NaN	NaN	NaN	NaN	NaN	NaN	NaN	NaN	24.2632	25.5165	24.5773	25.0057	8	8	35.2	38.157	0	58.219	927720000	23
DERPT_G10387	Full=Neural cell adhesion molecule 1 Short=N-CAM-1 Short=NCAM-1 ame: CD_antigen=CD56 Flags: Precursor extracellular region,neuron projection,organelle,cytoplasmic part,synaptic membrane,presynapse,protein binding,cell adhesion,axon guidance,learning or mem	7	4	NaN	NaN	NaN	NaN	25.1461	26.2355	25.1251	24.9959	23.9523	24.4028	25.4268	NaN	NaN	NaN	NaN	NaN	NaN	NaN	NaN	NaN	25.008	24.0829	25.7221	24.5687	18	18	11.5	196.07	0	58.149	1827200000	48
DERPT_G7670	Full=Ufm1-specific protease 2 Short= 2 nucleus,endoplasmic reticulum,protein-containing complex,protein binding,thiolester hydrolase activity,UFM1 hydrolase activity,proteolysis,sleep,regulation of intracellular estrogen receptor signaling pathway,response	0	4	NaN	NaN	NaN	NaN	NaN	NaN	NaN	NaN	NaN	NaN	NaN	NaN	NaN	NaN	NaN	NaN	NaN	NaN	NaN	NaN	24.2771	24.8738	22.3348	25.4162	14	14	36.9	67.967	0	57.528	899360000	30
DERPT_G8414	Full=Oxidation resistance 1 nucleoplasm,extracellular exosome,tRNA-splicing ligase complex,nuclear receptor transcription coactivator activity,nuclear hormone receptor binding,tRNA splicing, via endonucleolytic cleavage and ligation,response to oxidative s	0	4	NaN	NaN	NaN	NaN	NaN	NaN	NaN	NaN	NaN	NaN	NaN	NaN	NaN	NaN	NaN	NaN	NaN	NaN	NaN	NaN	23.0087	23.1378	23.0013	23.088	7	7	8	141.15	0	57.201	306410000	23
DERPT_G8483	Full=COP9 signalosome complex subunit 2 Short=Signalosome subunit 2 nucleoplasm,microtubule associated complex,proteasome regulatory particle, lid subcomplex,plasmodesma,chloroplast,membrane,proteasome storage granule,extracellular exosome,structural molec	0	2	NaN	NaN	NaN	NaN	NaN	NaN	NaN	NaN	NaN	NaN	NaN	NaN	NaN	NaN	NaN	NaN	NaN	NaN	NaN	NaN	NaN	24.131	NaN	23.3577	6	6	18.4	48.506	0	57.181	311150000	11
DERPT_G9817	Full=m7 diphosphatase ame: Full=DCS-1 ame: Full=Decapping scavenger enzyme ame: Full=Hint-related 7meGMP-directed hydrolase ame: Full=Histidine triad nucleotide-binding 5 ame: Full=Histidine triad member 5 Short=HINT-5 ame: Full=Scavenger mRNA-decapping en	0	4	NaN	NaN	NaN	NaN	NaN	NaN	NaN	NaN	NaN	NaN	NaN	NaN	NaN	NaN	NaN	NaN	NaN	NaN	NaN	NaN	23.9437	23.1312	24.1175	24.0743	7	7	35.1	38.424	0	56.881	513350000	15
DERPT_G6921	Full=Alanine--tRNA cytoplasmic ame: Full=Alanyl-tRNA synthetase Short= mitochondrion,cytosol,chloroplast,membrane,extracellular exosome,tRNA binding,aminoacyl-tRNA editing activity,alanine-tRNA ligase activity,protein binding,ATP binding,amino acid binding	0	3	NaN	NaN	NaN	NaN	NaN	NaN	NaN	NaN	NaN	NaN	NaN	NaN	NaN	NaN	NaN	NaN	NaN	NaN	NaN	NaN	23.8617	24.9073	NaN	24.1453	20	20	31.7	109.32	0	56.694	683980000	32
DERPT_G8987	---NA---	9	3	NaN	NaN	NaN	NaN	NaN	NaN	NaN	23.6694	26.9608	29.1	28.9536	26.37	26.2411	25.1415	24.619	25.0235	NaN	NaN	NaN	NaN	25.028	NaN	24.6227	25.008	5	4	24.2	27.292	0	56.159	4845700000	32
DERPT_G5137	Full=Eukaryotic translation initiation factor 3 subunit M Short=eIF3m ame: Full=Transport and Golgi organization 7 Short=Tango-7 Golgi apparatus,microtubule associated complex,apoptosome,investment cone,eukaryotic translation initiation factor 3 complex, e	0	3	NaN	NaN	NaN	NaN	NaN	NaN	NaN	NaN	NaN	NaN	NaN	NaN	NaN	NaN	NaN	NaN	NaN	NaN	NaN	NaN	22.366	23.0761	NaN	23.4578	8	8	30.9	43.921	0	56.135	273740000	10
DERPT_G3022	---NA---	3	4	NaN	NaN	NaN	NaN	NaN	NaN	NaN	NaN	NaN	NaN	NaN	NaN	25.679	26.8165	26.0906	NaN	NaN	NaN	NaN	NaN	25.0549	24.0407	24.5583	24.0309	6	6	28.4	19.119	0	55.943	941400000	21
DERPT_G1629	Full=3-hydroxyanthranilate 3,4-dioxygenase ame: Full=3-hydroxyanthranilate oxygenase Short=3-HAO ame: Full=3-hydroxyanthranilic acid dioxygenase Short=HAD membrane-bounded organelle,cytoplasmic part,3-hydroxyanthranilate 3,4-dioxygenase activity,iron ion b	4	4	NaN	NaN	NaN	NaN	NaN	NaN	24.1177	22.9579	25.1094	23.7648	NaN	NaN	NaN	NaN	NaN	NaN	NaN	NaN	NaN	NaN	26.4684	27.2178	23.8498	26.569	15	15	53.8	34.861	0	55.893	3193300000	42
DERPT_G4203	Full=60S ribosomal L4 cell wall,nucleolus,mitochondrial large ribosomal subunit,vacuolar membrane,plasma membrane,focal adhesion,plasmodesma,chloroplast,cytosolic large ribosomal subunit,A band,extracellular exosome,mRNA binding,structural constituent of r	3	4	26.3507	NaN	NaN	NaN	NaN	NaN	NaN	NaN	NaN	NaN	NaN	NaN	NaN	28.1515	NaN	NaN	27.3324	NaN	NaN	NaN	25.8947	26.8896	24.9868	26.2266	20	20	15.5	139.98	0	55.795	3018800000	52
DERPT_G1445	Full=V-type proton ATPase subunit H Short=V-ATPase subunit H ame: Full=Vacuolar proton pump subunit H vacuolar proton-transporting V-type ATPase, V1 domain,plant-type vacuole,Golgi apparatus,chloroplast,plasma membrane proton-transporting V-type ATPase com	0	4	NaN	NaN	NaN	NaN	NaN	NaN	NaN	NaN	NaN	NaN	NaN	NaN	NaN	NaN	NaN	NaN	NaN	NaN	NaN	NaN	23.3074	24.0664	23.183	24.4471	9	9	26.9	49.869	0	55.587	526940000	15
DERPT_G6136	Full=Uridine 5 -monophosphate synthase Short=UMP synthase Includes: ame: Full=Orotate phosphoribosyltransferase Short=OPRTase Includes: ame: Full=Orotidine 5 -phosphate decarboxylase ame: Full=OMPdecase cytosol,microtubule associated complex,orotate phosph	0	4	NaN	NaN	NaN	NaN	NaN	NaN	NaN	NaN	NaN	NaN	NaN	NaN	NaN	NaN	NaN	NaN	NaN	NaN	NaN	NaN	25.0072	25.3196	24.7268	25.3641	16	16	43.4	55.457	0	55.131	1118900000	40
DERPT_G4955	Full=Integrin-linked kinase stress fiber,nucleoplasm,endosome,endoplasmic reticulum,cell-cell junction,focal adhesion,integrin complex,basal plasma membrane,lamellipodium,M band,neuronal cell body,costamere,terminal bouton,dendritic shaft,Golgi apparatus p	1	4	24.5721	NaN	NaN	NaN	NaN	NaN	NaN	NaN	NaN	NaN	NaN	NaN	NaN	NaN	NaN	NaN	NaN	NaN	NaN	NaN	24.2003	25.0868	23.851	24.5812	13	13	36.9	51.397	0	54.766	805830000	35
DERPT_G11138	Allergen Homolog (Der f34): Full=2-iminobutanoate 2-iminopropanoate deaminase ame: Full=Enamine imine deaminase nucleus,mitochondrion,vacuole,peroxisome,cytosol,chloroplast stroma,thylakoid,chloroplast envelope,endoribonuclease activity, producing 3-phosp	2	0	NaN	NaN	NaN	NaN	NaN	NaN	NaN	NaN	NaN	27.0963	26.5451	NaN	NaN	NaN	NaN	NaN	NaN	NaN	NaN	NaN	NaN	NaN	NaN	NaN	10	6	78.9	14.098	0	54.584	1211300000	15
DERPT_G7501	Full=Protocatechuate 3,4-dioxygenase beta chain ame: Full=3,4-PCD ferric iron binding,oxidoreductase activity, acting on single donors with incorporation of molecular oxygen, incorporation of two atoms of oxygen,cellular aromatic compound metabolic process	4	4	NaN	NaN	NaN	NaN	NaN	NaN	NaN	NaN	25.8057	27.772	25.6483	NaN	22.1941	NaN	NaN	NaN	NaN	NaN	NaN	NaN	24.0553	24.9689	23.7055	24.3657	13	13	41.5	28.175	0	54.542	1741000000	35
DERPT_G2797	Full=Heat shock cognate 71 kDa ame: Full=Heat shock 70 kDa 8 synaptonemal complex,male germ cell nucleus,zona pellucida receptor complex,extracellular space,cell wall,mitochondrion,lysosomal membrane,late endosome,endoplasmic reticulum lumen,endoplasmic re	5	4	NaN	NaN	NaN	NaN	NaN	23.906	24.7786	25.0291	25.8381	23.9081	NaN	NaN	NaN	NaN	NaN	NaN	NaN	NaN	NaN	NaN	23.3516	24.2207	23.9697	23.4852	17	17	7.3	366.17	0	54.503	1089200000	23
DERPT_G3757	Full=Aldose 1-epimerase ame: Full=Galactose mutarotase cytoplasm,racemase and epimerase activity, acting on carbohydrates and derivatives,carbohydrate binding,galactose metabolic process	2	4	NaN	NaN	NaN	NaN	NaN	NaN	NaN	NaN	24.2145	24.9008	NaN	NaN	NaN	NaN	NaN	NaN	NaN	NaN	NaN	NaN	25.6826	25.0201	25.5648	25.049	14	14	41.5	42.441	0	54.454	1365400000	43
[truncated: 927 more rows]

## Sheet: B
cellular	GO ID	GO Name	GO Category	FDR	P-Value	Nr Test	Nr Reference	Non Annot Test	Non Annot Reference
[OVER]	GO:0005829	cytosol	CELLULAR_COMPONENT	7.76114e-46	5.33901e-49	627	318	1165	1821
[OVER]	GO:0005739	mitochondrion	CELLULAR_COMPONENT	6.18811e-30	8.5138e-33	476	251	1316	1888
[OVER]	GO:0016491	oxidoreductase activity	MOLECULAR_FUNCTION	2.33489e-21	4.28321e-24	248	100	1544	2039
[truncated: 164 more rows]

## Sheet: C
Tags	Annotation	FDR	P-Value	Nr Test	Nr Reference	Non Annot Test	Non Annot Reference
[truncated: 2 more rows]

[truncated: 1 more sheets: D]
